# Supplementary material for: Unbiased analysis of senescence associated secretory phenotype (SASP) to identify common components following different genotoxic stresses
Source: Aging (Albany NY). 2016 Jun 9;8(7):1316–27. doi: 10.18632/aging.100971 (PMC4993333; doi:10.18632/aging.100971)
Supplement: Supplementary file 2 [file aging-08-1316-s002.xlsx]

## Sheet: BM MSC REP sample 151027
N	Unused	Total	%Cov	%Cov(50)	%Cov(95)	Accession	Name	Species	Peptides(95%)	Accession			Molecular Function	PANTHER ID
1	199.74	199.74	47.34	40.07	36.17	sp|P12111|CO6A3_HUMAN	Collagen alpha-3(VI) chain OS=Homo sapiens GN=COL6A3 PE=1 SV=5	HUMAN	122	sp	P12111	CO6A3_HUMAN
2	195.32	195.32	58.76	50.75	47.95	sp|P02751|FINC_HUMAN	Fibronectin OS=Homo sapiens GN=FN1 PE=1 SV=4	HUMAN	264	sp	P02751	FINC_HUMAN
3	147.78	147.78	81.77	76.28	73.28	sp|P08123|CO1A2_HUMAN	Collagen alpha-2(I) chain OS=Homo sapiens GN=COL1A2 PE=1 SV=7	HUMAN	330	sp	P08123	CO1A2_HUMAN
4	143.42	143.42	41.3	34.8	28.21	sp|Q99715|COCA1_HUMAN	Collagen alpha-1(XII) chain OS=Homo sapiens GN=COL12A1 PE=1 SV=2	HUMAN	76	sp	Q99715	COCA1_HUMAN
5	126.68	129.16	77.94	70.29	63.66	sp|P02452|CO1A1_HUMAN	Collagen alpha-1(I) chain OS=Homo sapiens GN=COL1A1 PE=1 SV=5	HUMAN	413	sp	P02452	CO1A1_HUMAN
6	125.54	125.54	74.53	66.46	63.66	sp|P04264|K2C1_HUMAN	Keratin, type II cytoskeletal 1 OS=Homo sapiens GN=KRT1 PE=1 SV=6	HUMAN	96	sp	P04264	K2C1_HUMAN
7	90	103.6	85.29	82.47	71.36	sp|P35908|K22E_HUMAN	Keratin, type II cytoskeletal 2 epidermal OS=Homo sapiens GN=KRT2 PE=1 SV=2	HUMAN	64	sp	P35908	K22E_HUMAN
8	84.78	84.78	62.33	62.16	62.16	sp|P13645|K1C10_HUMAN	Keratin, type I cytoskeletal 10 OS=Homo sapiens GN=KRT10 PE=1 SV=6	HUMAN	75	sp	P13645	K1C10_HUMAN
9	77.79	77.8	24.25	11.87	8.775	sp|Q15149|PLEC_HUMAN	Plectin OS=Homo sapiens GN=PLEC PE=1 SV=3	HUMAN	39	sp	Q15149	PLEC_HUMAN
10	76.84	76.84	32.03	22.75	18.64	tr|Q5HY54|Q5HY54_HUMAN	Filamin-A OS=Homo sapiens GN=FLNA PE=1 SV=1	HUMAN	40	tr	Q5HY54	Q5HY54_HUMAN
11	70.27	72.51	85.19	75.97	63.52	sp|P08670|VIME_HUMAN	Vimentin OS=Homo sapiens GN=VIM PE=1 SV=4	HUMAN	57	sp	P08670	VIME_HUMAN
12	69.81	73.87	70.47	57.62	55.7	sp|P35527|K1C9_HUMAN	Keratin, type I cytoskeletal 9 OS=Homo sapiens GN=KRT9 PE=1 SV=3	HUMAN	49	sp	P35527	K1C9_HUMAN
13	66.7	66.7	52.91	51.83	49.54	sp|P11021|GRP78_HUMAN	78 kDa glucose-regulated protein OS=Homo sapiens GN=HSPA5 PE=1 SV=2	HUMAN	42	sp	P11021	GRP78_HUMAN
14	60.3	60.3	51.05	45.78	42.92	sp|P02545|LMNA_HUMAN	Prelamin-A/C OS=Homo sapiens GN=LMNA PE=1 SV=1	HUMAN	33	sp	P02545	LMNA_HUMAN
15	53.63	54.77	27.86	20.51	15.26	sp|P35579|MYH9_HUMAN	Myosin-9 OS=Homo sapiens GN=MYH9 PE=1 SV=4	HUMAN	27	sp	P35579	MYH9_HUMAN
16	50.56	50.56	55.64	52.87	44.36	sp|P30101|PDIA3_HUMAN	Protein disulfide-isomerase A3 OS=Homo sapiens GN=PDIA3 PE=1 SV=4	HUMAN	31	sp	P30101	PDIA3_HUMAN
17	48.07	48.12	61.87	44	36.36	sp|P02461|CO3A1_HUMAN	Collagen alpha-1(III) chain OS=Homo sapiens GN=COL3A1 PE=1 SV=4	HUMAN	98	sp	P02461	CO3A1_HUMAN
18	47.79	47.79	52.17	47.83	44.82	sp|P14618|KPYM_HUMAN	Pyruvate kinase PKM OS=Homo sapiens GN=PKM PE=1 SV=4	HUMAN	31	sp	P14618	KPYM_HUMAN
19	47.38	47.38	72.8	69.33	61.07	sp|P63261|ACTG_HUMAN	Actin, cytoplasmic 2 OS=Homo sapiens GN=ACTG1 PE=1 SV=1	HUMAN	47	sp	P63261	ACTG_HUMAN
20	46.73	46.78	65.55	57.09	50	sp|P07237|PDIA1_HUMAN	Protein disulfide-isomerase OS=Homo sapiens GN=P4HB PE=1 SV=3	HUMAN	29	sp	P07237	PDIA1_HUMAN
21	46.35	46.35	63.82	61.52	56.22	sp|P06733|ENOA_HUMAN	Alpha-enolase OS=Homo sapiens GN=ENO1 PE=1 SV=2	HUMAN	27	sp	P06733	ENOA_HUMAN
22	45.62	52.04	28.84	16.77	12.7	sp|Q14315|FLNC_HUMAN	Filamin-C OS=Homo sapiens GN=FLNC PE=1 SV=3	HUMAN	26	sp	Q14315	FLNC_HUMAN
23	42.99	42.99	40.61	34.83	34.83	sp|P29401|TKT_HUMAN	Transketolase OS=Homo sapiens GN=TKT PE=1 SV=3	HUMAN	28	sp	P29401	TKT_HUMAN
24	42.47	42.47	62.83	55.75	47.79	sp|P07355|ANXA2_HUMAN	Annexin A2 OS=Homo sapiens GN=ANXA2 PE=1 SV=2	HUMAN	23	sp	P07355	ANXA2_HUMAN
25	41.39	41.39	28.55	24.62	19.4	sp|P07996|TSP1_HUMAN	Thrombospondin-1 OS=Homo sapiens GN=THBS1 PE=1 SV=2	HUMAN	22	sp	P07996	TSP1_HUMAN
26	40.65	42.77	51.99	44.85	43.69	sp|Q07065|CKAP4_HUMAN	Cytoskeleton-associated protein 4 OS=Homo sapiens GN=CKAP4 PE=1 SV=2	HUMAN	24	sp	Q07065	CKAP4_HUMAN
27	40.12	40.12	36.49	30.51	26.03	sp|P14625|ENPL_HUMAN	Endoplasmin OS=Homo sapiens GN=HSP90B1 PE=1 SV=1	HUMAN	20	sp	P14625	ENPL_HUMAN
28	39.32	40.44	22.8	15.64	12.61	tr|A0A0A0MTC7|A0A0A0MTC7_HUMAN	Laminin subunit alpha-4 OS=Homo sapiens GN=LAMA4 PE=1 SV=1	HUMAN	21	tr	A0A0A0MTC7	A0A0A0MTC7_HUMAN
29	37.27	37.27	22.43	14.09	11.05	tr|G3XAI2|G3XAI2_HUMAN	Laminin subunit beta-1 OS=Homo sapiens GN=LAMB1 PE=1 SV=1	HUMAN	20	tr	G3XAI2	G3XAI2_HUMAN
30	36.34	36.34	70.16	56.05	54.84	sp|P67936|TPM4_HUMAN	Tropomyosin alpha-4 chain OS=Homo sapiens GN=TPM4 PE=1 SV=3	HUMAN	19	sp	P67936	TPM4_HUMAN
31	36.05	36.05	26.04	15.29	12.31	sp|P11047|LAMC1_HUMAN	Laminin subunit gamma-1 OS=Homo sapiens GN=LAMC1 PE=1 SV=3	HUMAN	20	sp	P11047	LAMC1_HUMAN
32	35.18	35.18	41.58	34.55	31.92	sp|Q15582|BGH3_HUMAN	Transforming growth factor-beta-induced protein ig-h3 OS=Homo sapiens GN=TGFBI PE=1 SV=1	HUMAN	22	sp	Q15582	BGH3_HUMAN
33	35.02	43.34	59.32	48.52	47.25	sp|P02533|K1C14_HUMAN	Keratin, type I cytoskeletal 14 OS=Homo sapiens GN=KRT14 PE=1 SV=4	HUMAN	28	sp	P02533	K1C14_HUMAN
34	34.21	34.59	38.45	34.42	31.01	sp|P13667|PDIA4_HUMAN	Protein disulfide-isomerase A4 OS=Homo sapiens GN=PDIA4 PE=1 SV=2	HUMAN	21	sp	P13667	PDIA4_HUMAN
35	33.14	33.14	54.89	43.21	40.22	tr|J3KPS3|J3KPS3_HUMAN	Fructose-bisphosphate aldolase OS=Homo sapiens GN=ALDOA PE=1 SV=1	HUMAN	20	tr	J3KPS3	J3KPS3_HUMAN
36	32.58	32.58	47.74	41.23	39.78	sp|P25705|ATPA_HUMAN	ATP synthase subunit alpha, mitochondrial OS=Homo sapiens GN=ATP5A1 PE=1 SV=1	HUMAN	21	sp	P25705	ATPA_HUMAN
37	31.5	31.5	52.74	47.26	42.72	sp|P06576|ATPB_HUMAN	ATP synthase subunit beta, mitochondrial OS=Homo sapiens GN=ATP5B PE=1 SV=3	HUMAN	19	sp	P06576	ATPB_HUMAN
38	31.42	31.42	58.73	53.92	45.78	sp|P00338|LDHA_HUMAN	L-lactate dehydrogenase A chain OS=Homo sapiens GN=LDHA PE=1 SV=2	HUMAN	22	sp	P00338	LDHA_HUMAN
39	31.28	31.28	41.62	23.2	21.83	tr|A0A087X0S5|A0A087X0S5_HUMAN	Collagen alpha-1(VI) chain OS=Homo sapiens GN=COL6A1 PE=1 SV=1	HUMAN	19	tr	A0A087X0S5	A0A087X0S5_HUMAN
40	31.18	31.45	29.33	25.37	22.03	tr|B1ALD9|B1ALD9_HUMAN	Periostin OS=Homo sapiens GN=POSTN PE=1 SV=1	HUMAN	22	tr	B1ALD9	B1ALD9_HUMAN
41	30.78	31.04	36.77	26.13	22.83	sp|O43707|ACTN4_HUMAN	Alpha-actinin-4 OS=Homo sapiens GN=ACTN4 PE=1 SV=2	HUMAN	17	sp	O43707	ACTN4_HUMAN
42	30.19	37.95	43.19	33.75	31.27	sp|P11142|HSP7C_HUMAN	Heat shock cognate 71 kDa protein OS=Homo sapiens GN=HSPA8 PE=1 SV=1	HUMAN	22	sp	P11142	HSP7C_HUMAN
43	29.89	29.89	33.17	20.51	16.49	sp|P12110|CO6A2_HUMAN	Collagen alpha-2(VI) chain OS=Homo sapiens GN=COL6A2 PE=1 SV=4	HUMAN	21	sp	P12110	CO6A2_HUMAN
44	29.71	29.71	48.49	41.21	36.43	sp|P07093|GDN_HUMAN	Glia-derived nexin OS=Homo sapiens GN=SERPINE2 PE=1 SV=1	HUMAN	17	sp	P07093	GDN_HUMAN
45	29.25	29.25	49.39	29.98	24.44	sp|P26038|MOES_HUMAN	Moesin OS=Homo sapiens GN=MSN PE=1 SV=3	HUMAN	15	sp	P26038	MOES_HUMAN
46	28.58	28.58	66.2	62.5	59.26	sp|P23284|PPIB_HUMAN	Peptidyl-prolyl cis-trans isomerase B OS=Homo sapiens GN=PPIB PE=1 SV=2	HUMAN	27	sp	P23284	PPIB_HUMAN
47	28.5	29.71	32.65	27.6	19.13	sp|P07900|HS90A_HUMAN	Heat shock protein HSP 90-alpha OS=Homo sapiens GN=HSP90AA1 PE=1 SV=5	HUMAN	14	sp	P07900	HS90A_HUMAN
48	26.81	26.81	51.96	38.38	32.64	sp|P36222|CH3L1_HUMAN	Chitinase-3-like protein 1 OS=Homo sapiens GN=CHI3L1 PE=1 SV=2	HUMAN	21	sp	P36222	CH3L1_HUMAN
49	26.63	26.63	35.45	26.52	24.24	sp|P08253|MMP2_HUMAN	72 kDa type IV collagenase OS=Homo sapiens GN=MMP2 PE=1 SV=2	HUMAN	17	sp	P08253	MMP2_HUMAN
50	26.41	26.41	37.7	31.41	28.8	sp|P10809|CH60_HUMAN	60 kDa heat shock protein, mitochondrial OS=Homo sapiens GN=HSPD1 PE=1 SV=2	HUMAN	15	sp	P10809	CH60_HUMAN
51	26.12	30.28	19.41	9.531	6.341	sp|O75369|FLNB_HUMAN	Filamin-B OS=Homo sapiens GN=FLNB PE=1 SV=2	HUMAN	15	sp	O75369	FLNB_HUMAN
52	25.97	26.15	24.05	19.17	17.27	sp|Q14697|GANAB_HUMAN	Neutral alpha-glucosidase AB OS=Homo sapiens GN=GANAB PE=1 SV=3	HUMAN	13	sp	Q14697	GANAB_HUMAN
53	25.54	25.65	43.68	22	16.58	sp|P02768|ALBU_HUMAN	Serum albumin OS=Homo sapiens GN=ALB PE=1 SV=2	HUMAN	30	sp	P02768	ALBU_HUMAN
54	24.63	24.63	39.67	36.15	32.16	tr|Q5JP53|Q5JP53_HUMAN	Tubulin beta chain OS=Homo sapiens GN=TUBB PE=1 SV=1	HUMAN	15	tr	Q5JP53	Q5JP53_HUMAN
55	24.38	24.38	47.55	28.83	21.25	sp|P08133|ANXA6_HUMAN	Annexin A6 OS=Homo sapiens GN=ANXA6 PE=1 SV=3	HUMAN	12	sp	P08133	ANXA6_HUMAN
56	24.28	24.29	49.13	42.77	40.17	sp|P04083|ANXA1_HUMAN	Annexin A1 OS=Homo sapiens GN=ANXA1 PE=1 SV=2	HUMAN	14	sp	P04083	ANXA1_HUMAN
57	23.49	23.54	45.7	40.95	29.97	sp|P37837|TALDO_HUMAN	Transaldolase OS=Homo sapiens GN=TALDO1 PE=1 SV=2	HUMAN	14	sp	P37837	TALDO_HUMAN
58	21.61	22.12	39.5	29.29	24.66	tr|F5H5D3|F5H5D3_HUMAN	Tubulin alpha-1C chain OS=Homo sapiens GN=TUBA1C PE=1 SV=1	HUMAN	13	tr	F5H5D3	F5H5D3_HUMAN
59	21.47	22.59	19.91	10.79	7.675	sp|P55268|LAMB2_HUMAN	Laminin subunit beta-2 OS=Homo sapiens GN=LAMB2 PE=1 SV=2	HUMAN	13	sp	P55268	LAMB2_HUMAN
60	21.33	21.33	57.31	44.12	39.81	sp|P00558|PGK1_HUMAN	Phosphoglycerate kinase 1 OS=Homo sapiens GN=PGK1 PE=1 SV=3	HUMAN	14	sp	P00558	PGK1_HUMAN
61	21.14	21.14	47.13	40.43	36.12	sp|P50454|SERPH_HUMAN	Serpin H1 OS=Homo sapiens GN=SERPINH1 PE=1 SV=2	HUMAN	12	sp	P50454	SERPH_HUMAN
62	20.77	35.92	48.14	34.41	27.46	sp|P13647|K2C5_HUMAN	Keratin, type II cytoskeletal 5 OS=Homo sapiens GN=KRT5 PE=1 SV=3	HUMAN	23	sp	P13647	K2C5_HUMAN
63	20.28	20.28	39.27	29.67	19.9	tr|A0A0A0MTS2|A0A0A0MTS2_HUMAN	Glucose-6-phosphate isomerase (Fragment) OS=Homo sapiens GN=GPI PE=1 SV=1	HUMAN	12	tr	A0A0A0MTS2	A0A0A0MTS2_HUMAN
64	20.06	20.06	24.2	17.17	13.13	sp|P15144|AMPN_HUMAN	Aminopeptidase N OS=Homo sapiens GN=ANPEP PE=1 SV=4	HUMAN	13	sp	P15144	AMPN_HUMAN
65	19.69	19.69	50.63	42.19	33.44	sp|P08758|ANXA5_HUMAN	Annexin A5 OS=Homo sapiens GN=ANXA5 PE=1 SV=2	HUMAN	14	sp	P08758	ANXA5_HUMAN
66	19.61	19.61	45.52	28.67	20.97	sp|P00367|DHE3_HUMAN	Glutamate dehydrogenase 1, mitochondrial OS=Homo sapiens GN=GLUD1 PE=1 SV=2	HUMAN	14	sp	P00367	DHE3_HUMAN
67	19.6	19.6	32.45	25.54	22.57	sp|P04843|RPN1_HUMAN	Dolichyl-diphosphooligosaccharide--protein glycosyltransferase subunit 1 OS=Homo sapiens GN=RPN1 PE=1 SV=1	HUMAN	10	sp	P04843	RPN1_HUMAN
68	19.58	19.6	40.49	40.49	35.63	sp|P61981|1433G_HUMAN	14-3-3 protein gamma OS=Homo sapiens GN=YWHAG PE=1 SV=2	HUMAN	10	sp	P61981	1433G_HUMAN
69	18.47	18.47	45.89	30.95	25.11	sp|P68104|EF1A1_HUMAN	Elongation factor 1-alpha 1 OS=Homo sapiens GN=EEF1A1 PE=1 SV=1	HUMAN	10	sp	P68104	EF1A1_HUMAN
70	18.42	18.42	21.54	17.26	15.38	sp|Q08380|LG3BP_HUMAN	Galectin-3-binding protein OS=Homo sapiens GN=LGALS3BP PE=1 SV=1	HUMAN	9	sp	Q08380	LG3BP_HUMAN
71	18.37	18.37	36.88	34.98	32.32	sp|P25786|PSA1_HUMAN	Proteasome subunit alpha type-1 OS=Homo sapiens GN=PSMA1 PE=1 SV=1	HUMAN	10	sp	P25786	PSA1_HUMAN
72	18.34	18.34	32.41	24.12	22.73	tr|A0A087WSY9|A0A087WSY9_HUMAN	Thioredoxin reductase 1, cytoplasmic OS=Homo sapiens GN=TXNRD1 PE=1 SV=1	HUMAN	11	tr	A0A087WSY9	A0A087WSY9_HUMAN
73	17.5	17.5	39.45	27.64	23	sp|P48637|GSHB_HUMAN	Glutathione synthetase OS=Homo sapiens GN=GSS PE=1 SV=1	HUMAN	9	sp	P48637	GSHB_HUMAN
74	17.39	17.39	36.98	32.54	31.07	sp|P51884|LUM_HUMAN	Lumican OS=Homo sapiens GN=LUM PE=1 SV=2	HUMAN	11	sp	P51884	LUM_HUMAN
75	17.38	17.39	41.42	37.57	37.57	sp|P40926|MDHM_HUMAN	Malate dehydrogenase, mitochondrial OS=Homo sapiens GN=MDH2 PE=1 SV=3	HUMAN	12	sp	P40926	MDHM_HUMAN
76	17.37	17.38	25.08	14.04	8.923	tr|A0A087WXW9|A0A087WXW9_HUMAN	Collagen alpha-1(V) chain OS=Homo sapiens GN=COL5A1 PE=1 SV=1	HUMAN	12	tr	A0A087WXW9	A0A087WXW9_HUMAN
77	17.31	17.31	54.77	52.26	41.21	sp|Q06830|PRDX1_HUMAN	Peroxiredoxin-1 OS=Homo sapiens GN=PRDX1 PE=1 SV=1	HUMAN	12	sp	Q06830	PRDX1_HUMAN
78	17.2	17.2	58.09	48.96	41.91	sp|P20618|PSB1_HUMAN	Proteasome subunit beta type-1 OS=Homo sapiens GN=PSMB1 PE=1 SV=2	HUMAN	9	sp	P20618	PSB1_HUMAN
79	17.02	17.02	45.52	33.58	25.37	sp|P05121|PAI1_HUMAN	Plasminogen activator inhibitor 1 OS=Homo sapiens GN=SERPINE1 PE=1 SV=1	HUMAN	11	sp	P05121	PAI1_HUMAN
80	16.77	16.77	43.75	36.41	23.64	sp|P21810|PGS1_HUMAN	Biglycan OS=Homo sapiens GN=BGN PE=1 SV=2	HUMAN	8	sp	P21810	PGS1_HUMAN
81	16.68	16.68	12.77	6.406	4.861	sp|P24821|TENA_HUMAN	Tenascin OS=Homo sapiens GN=TNC PE=1 SV=3	HUMAN	10	sp	P24821	TENA_HUMAN
82	16.66	16.66	44.78	44.78	36.72	sp|P04406|G3P_HUMAN	Glyceraldehyde-3-phosphate dehydrogenase OS=Homo sapiens GN=GAPDH PE=1 SV=3	HUMAN	18	sp	P04406	G3P_HUMAN
83	16.59	16.59	55.24	50.7	33.92	sp|P60174|TPIS_HUMAN	Triosephosphate isomerase OS=Homo sapiens GN=TPI1 PE=1 SV=3	HUMAN	11	sp	P60174	TPIS_HUMAN
84	16.43	16.43	28.48	15.17	10.67	sp|P18206|VINC_HUMAN	Vinculin OS=Homo sapiens GN=VCL PE=1 SV=4	HUMAN	9	sp	P18206	VINC_HUMAN
85	16.4	16.4	23.03	15.53	14.32	sp|O00391|QSOX1_HUMAN	Sulfhydryl oxidase 1 OS=Homo sapiens GN=QSOX1 PE=1 SV=3	HUMAN	8	sp	O00391	QSOX1_HUMAN
86	16.24	16.28	37.8	22.49	21.53	sp|P36955|PEDF_HUMAN	Pigment epithelium-derived factor OS=Homo sapiens GN=SERPINF1 PE=1 SV=4	HUMAN	9	sp	P36955	PEDF_HUMAN
87	16.22	16.22	31.75	18.98	16.61	sp|P50990|TCPQ_HUMAN	T-complex protein 1 subunit theta OS=Homo sapiens GN=CCT8 PE=1 SV=4	HUMAN	8	sp	P50990	TCPQ_HUMAN
88	15.98	16.01	41.59	28.88	22.84	sp|P01008|ANT3_HUMAN	Antithrombin-III OS=Homo sapiens GN=SERPINC1 PE=1 SV=1	HUMAN	19	sp	P01008	ANT3_HUMAN
89	15.94	21.03	50.9	46.11	44.31	sp|P07195|LDHB_HUMAN	L-lactate dehydrogenase B chain OS=Homo sapiens GN=LDHB PE=1 SV=2	HUMAN	22	sp	P07195	LDHB_HUMAN
90	15.88	15.88	30.31	20.91	14.98	sp|P21589|5NTD_HUMAN	5'-nucleotidase OS=Homo sapiens GN=NT5E PE=1 SV=1	HUMAN	8	sp	P21589	5NTD_HUMAN
91	15.76	15.76	37.14	33.5	25.73	sp|P07339|CATD_HUMAN	Cathepsin D OS=Homo sapiens GN=CTSD PE=1 SV=1	HUMAN	9	sp	P07339	CATD_HUMAN
92	15.72	17.82	61.82	61.82	43.64	sp|P62937|PPIA_HUMAN	Peptidyl-prolyl cis-trans isomerase A OS=Homo sapiens GN=PPIA PE=1 SV=2	HUMAN	11	sp	P62937	PPIA_HUMAN
93	15.71	15.72	42.39	29.22	26.54	tr|E9PEX6|E9PEX6_HUMAN	Dihydrolipoyl dehydrogenase, mitochondrial OS=Homo sapiens GN=DLD PE=1 SV=1	HUMAN	10	tr	E9PEX6	E9PEX6_HUMAN
94	15.54	15.54	16.81	10.26	10.26	sp|P05023|AT1A1_HUMAN	Sodium/potassium-transporting ATPase subunit alpha-1 OS=Homo sapiens GN=ATP1A1 PE=1 SV=1	HUMAN	9	sp	P05023	AT1A1_HUMAN
95	15.54	15.54	35.38	22.84	22.84	sp|P07585|PGS2_HUMAN	Decorin OS=Homo sapiens GN=DCN PE=1 SV=1	HUMAN	9	sp	P07585	PGS2_HUMAN
96	15.45	15.45	52.57	39.34	30.88	sp|P35232|PHB_HUMAN	Prohibitin OS=Homo sapiens GN=PHB PE=1 SV=1	HUMAN	8	sp	P35232	PHB_HUMAN
97	15.43	15.45	22.88	21.05	15.1	sp|P26641|EF1G_HUMAN	Elongation factor 1-gamma OS=Homo sapiens GN=EEF1G PE=1 SV=3	HUMAN	8	sp	P26641	EF1G_HUMAN
98	15.23	15.23	14.18	9.47	5.837	tr|A0A087WVQ6|A0A087WVQ6_HUMAN	Clathrin heavy chain OS=Homo sapiens GN=CLTC PE=1 SV=1	HUMAN	9	tr	A0A087WVQ6	A0A087WVQ6_HUMAN
99	15.18	15.18	34.52	28.51	26.28	sp|P10909|CLUS_HUMAN	Clusterin OS=Homo sapiens GN=CLU PE=1 SV=1	HUMAN	8	sp	P10909	CLUS_HUMAN
100	15.04	15.04	31.25	21.88	19.17	sp|O43854|EDIL3_HUMAN	EGF-like repeat and discoidin I-like domain-containing protein 3 OS=Homo sapiens GN=EDIL3 PE=1 SV=1	HUMAN	9	sp	O43854	EDIL3_HUMAN
101	14.94	15.6	37.31	21.48	16.7	sp|Q02818|NUCB1_HUMAN	Nucleobindin-1 OS=Homo sapiens GN=NUCB1 PE=1 SV=4	HUMAN	8	sp	Q02818	NUCB1_HUMAN
102	14.81	28.19	34.3	27.58	20.18	sp|P12814|ACTN1_HUMAN	Alpha-actinin-1 OS=Homo sapiens GN=ACTN1 PE=1 SV=2	HUMAN	15	sp	P12814	ACTN1_HUMAN
103	14.65	14.65	31.59	26.59	23.18	sp|Q15084|PDIA6_HUMAN	Protein disulfide-isomerase A6 OS=Homo sapiens GN=PDIA6 PE=1 SV=1	HUMAN	8	sp	Q15084	PDIA6_HUMAN
104	14.58	14.58	50.57	49.05	37.64	sp|P28074|PSB5_HUMAN	Proteasome subunit beta type-5 OS=Homo sapiens GN=PSMB5 PE=1 SV=3	HUMAN	7	sp	P28074	PSB5_HUMAN
105	14.56	18.34	51.84	48.57	35.1	sp|P63104|1433Z_HUMAN	14-3-3 protein zeta/delta OS=Homo sapiens GN=YWHAZ PE=1 SV=1	HUMAN	13	sp	P63104	1433Z_HUMAN
106	14.55	14.55	40.93	28.6	24.49	sp|P78371|TCPB_HUMAN	T-complex protein 1 subunit beta OS=Homo sapiens GN=CCT2 PE=1 SV=4	HUMAN	11	sp	P78371	TCPB_HUMAN
107	14.39	14.4	23.18	12.88	8.735	sp|Q14764|MVP_HUMAN	Major vault protein OS=Homo sapiens GN=MVP PE=1 SV=4	HUMAN	8	sp	Q14764	MVP_HUMAN
108	14.21	14.21	28.29	15.76	10.67	sp|P55072|TERA_HUMAN	Transitional endoplasmic reticulum ATPase OS=Homo sapiens GN=VCP PE=1 SV=4	HUMAN	7	sp	P55072	TERA_HUMAN
109	13.97	17.41	58.43	43.92	32.94	sp|P62258|1433E_HUMAN	14-3-3 protein epsilon OS=Homo sapiens GN=YWHAE PE=1 SV=1	HUMAN	14	sp	P62258	1433E_HUMAN
110	13.93	13.93	53.44	52.91	44.44	sp|Q99497|PARK7_HUMAN	Protein deglycase DJ-1 OS=Homo sapiens GN=PARK7 PE=1 SV=2	HUMAN	8	sp	Q99497	PARK7_HUMAN
111	13.87	13.87	31.37	19.15	16.79	sp|P38646|GRP75_HUMAN	Stress-70 protein, mitochondrial OS=Homo sapiens GN=HSPA9 PE=1 SV=2	HUMAN	10	sp	P38646	GRP75_HUMAN
112	12.97	12.97	46.89	43.15	43.15	sp|O00299|CLIC1_HUMAN	Chloride intracellular channel protein 1 OS=Homo sapiens GN=CLIC1 PE=1 SV=4	HUMAN	8	sp	O00299	CLIC1_HUMAN
113	12.79	12.79	48.29	40.17	38.03	sp|P25787|PSA2_HUMAN	Proteasome subunit alpha type-2 OS=Homo sapiens GN=PSMA2 PE=1 SV=2	HUMAN	8	sp	P25787	PSA2_HUMAN
114	12.71	28.63	45.63	36.03	26.2	sp|P13646|K1C13_HUMAN	Keratin, type I cytoskeletal 13 OS=Homo sapiens GN=KRT13 PE=1 SV=4	HUMAN	19	sp	P13646	K1C13_HUMAN
115	12.6	34.54	51.8	40.38	36.15	sp|P08779|K1C16_HUMAN	Keratin, type I cytoskeletal 16 OS=Homo sapiens GN=KRT16 PE=1 SV=4	HUMAN	22	sp	P08779	K1C16_HUMAN
116	12.46	12.46	43.64	31.82	31.82	sp|P81605|DCD_HUMAN	Dermcidin OS=Homo sapiens GN=DCD PE=1 SV=2	HUMAN	7	sp	P81605	DCD_HUMAN
117	12.43	12.43	40.39	29.8	26.27	sp|P25788|PSA3_HUMAN	Proteasome subunit alpha type-3 OS=Homo sapiens GN=PSMA3 PE=1 SV=2	HUMAN	8	sp	P25788	PSA3_HUMAN
118	12.39	12.39	56.15	38.5	30.48	sp|P30086|PEBP1_HUMAN	Phosphatidylethanolamine-binding protein 1 OS=Homo sapiens GN=PEBP1 PE=1 SV=3	HUMAN	8	sp	P30086	PEBP1_HUMAN
119	12.38	40.32	54.79	31.74	26.24	sp|P02538|K2C6A_HUMAN	Keratin, type II cytoskeletal 6A OS=Homo sapiens GN=KRT6A PE=1 SV=3	HUMAN	24	sp	P02538	K2C6A_HUMAN
120	12.28	12.28	37.91	19.53	17.21	sp|P00505|AATM_HUMAN	Aspartate aminotransferase, mitochondrial OS=Homo sapiens GN=GOT2 PE=1 SV=3	HUMAN	7	sp	P00505	AATM_HUMAN
121	12.06	12.06	69.74	53.29	43.42	sp|P62269|RS18_HUMAN	40S ribosomal protein S18 OS=Homo sapiens GN=RPS18 PE=1 SV=3	HUMAN	8	sp	P62269	RS18_HUMAN
122	11.94	11.94	5.944	1.936	1.754	sp|P98160|PGBM_HUMAN	Basement membrane-specific heparan sulfate proteoglycan core protein OS=Homo sapiens GN=HSPG2 PE=1 SV=4	HUMAN	7	sp	P98160	PGBM_HUMAN
123	11.89	11.89	57.21	49.75	44.28	sp|Q01995|TAGL_HUMAN	Transgelin OS=Homo sapiens GN=TAGLN PE=1 SV=4	HUMAN	10	sp	Q01995	TAGL_HUMAN
124	11.85	12.03	16.13	10.41	6.399	sp|P35442|TSP2_HUMAN	Thrombospondin-2 OS=Homo sapiens GN=THBS2 PE=1 SV=2	HUMAN	6	sp	P35442	TSP2_HUMAN
125	11.67	11.67	39.64	28.95	19.38	sp|Q15113|PCOC1_HUMAN	Procollagen C-endopeptidase enhancer 1 OS=Homo sapiens GN=PCOLCE PE=1 SV=2	HUMAN	8	sp	Q15113	PCOC1_HUMAN
126	11.56	11.56	57.14	52.38	52.38	sp|P09211|GSTP1_HUMAN	Glutathione S-transferase P OS=Homo sapiens GN=GSTP1 PE=1 SV=2	HUMAN	7	sp	P09211	GSTP1_HUMAN
127	11.49	11.79	18.8	8.858	6.89	sp|Q9Y6C2|EMIL1_HUMAN	EMILIN-1 OS=Homo sapiens GN=EMILIN1 PE=1 SV=2	HUMAN	6	sp	Q9Y6C2	EMIL1_HUMAN
128	11.49	11.49	29.55	11.34	11.34	sp|Q96AY3|FKB10_HUMAN	Peptidyl-prolyl cis-trans isomerase FKBP10 OS=Homo sapiens GN=FKBP10 PE=1 SV=1	HUMAN	7	sp	Q96AY3	FKB10_HUMAN
129	11.48	11.48	47.72	31.98	25.38	tr|A0A0B4J2A4|A0A0B4J2A4_HUMAN	3-ketoacyl-CoA thiolase, mitochondrial OS=Homo sapiens GN=ACAA2 PE=4 SV=1	HUMAN	7	tr	A0A0B4J2A4	A0A0B4J2A4_HUMAN
130	11.44	12.32	24.7	17.68	15.55	sp|Q96D15|RCN3_HUMAN	Reticulocalbin-3 OS=Homo sapiens GN=RCN3 PE=1 SV=1	HUMAN	7	sp	Q96D15	RCN3_HUMAN
131	11.27	11.27	33.09	20.14	14.87	sp|P27797|CALR_HUMAN	Calreticulin OS=Homo sapiens GN=CALR PE=1 SV=1	HUMAN	7	sp	P27797	CALR_HUMAN
132	11.25	11.27	57.61	46.91	24.69	sp|P23396|RS3_HUMAN	40S ribosomal protein S3 OS=Homo sapiens GN=RPS3 PE=1 SV=2	HUMAN	6	sp	P23396	RS3_HUMAN
133	11.14	11.15	13.37	9.157	9.157	sp|P09871|C1S_HUMAN	Complement C1s subcomponent OS=Homo sapiens GN=C1S PE=1 SV=1	HUMAN	7	sp	P09871	C1S_HUMAN
134	11.13	11.13	22.38	7.459	7.459	sp|P13639|EF2_HUMAN	Elongation factor 2 OS=Homo sapiens GN=EEF2 PE=1 SV=4	HUMAN	6	sp	P13639	EF2_HUMAN
135	11.12	11.12	29.4	16.15	14.7	sp|P52209|6PGD_HUMAN	6-phosphogluconate dehydrogenase, decarboxylating OS=Homo sapiens GN=PGD PE=1 SV=3	HUMAN	6	sp	P52209	6PGD_HUMAN
136	10.95	10.95	52.05	38.7	32.88	tr|Q32Q12|Q32Q12_HUMAN	Nucleoside diphosphate kinase OS=Homo sapiens GN=NME1-NME2 PE=1 SV=1	HUMAN	7	tr	Q32Q12	Q32Q12_HUMAN
137	10.86	33.42	39.92	29.83	23.34	sp|P08238|HS90B_HUMAN	Heat shock protein HSP 90-beta OS=Homo sapiens GN=HSP90AB1 PE=1 SV=4	HUMAN	17	sp	P08238	HS90B_HUMAN
138	10.71	10.71	33.05	33.05	29.29	sp|P28072|PSB6_HUMAN	Proteasome subunit beta type-6 OS=Homo sapiens GN=PSMB6 PE=1 SV=4	HUMAN	7	sp	P28072	PSB6_HUMAN
139	10.49	10.49	17.33	14.99	8.116	sp|Q02809|PLOD1_HUMAN	Procollagen-lysine,2-oxoglutarate 5-dioxygenase 1 OS=Homo sapiens GN=PLOD1 PE=1 SV=2	HUMAN	5	sp	Q02809	PLOD1_HUMAN
140	10.45	10.45	27.73	17.61	13.16	sp|O60701|UGDH_HUMAN	UDP-glucose 6-dehydrogenase OS=Homo sapiens GN=UGDH PE=1 SV=1	HUMAN	5	sp	O60701	UGDH_HUMAN
141	10.42	10.42	26.24	26.24	22.05	tr|G3V3M6|G3V3M6_HUMAN	DNA-(apurinic or apyrimidinic site) lyase (Fragment) OS=Homo sapiens GN=APEX1 PE=1 SV=1	HUMAN	6	tr	G3V3M6	G3V3M6_HUMAN
142	10.41	10.69	33.62	14.94	9.273	sp|P05997|CO5A2_HUMAN	Collagen alpha-2(V) chain OS=Homo sapiens GN=COL5A2 PE=1 SV=3	HUMAN	11	sp	P05997	CO5A2_HUMAN
143	10.4	10.4	27.94	25.71	22.86	tr|D3DQH8|D3DQH8_HUMAN	SPARC OS=Homo sapiens GN=SPARC PE=1 SV=1	HUMAN	11	tr	D3DQH8	D3DQH8_HUMAN
144	10.3	10.3	29.28	29.28	29.28	tr|F8WCF6|F8WCF6_HUMAN	Protein ARPC4-TTLL3 OS=Homo sapiens GN=ARPC4-TTLL3 PE=1 SV=1	HUMAN	6	tr	F8WCF6	F8WCF6_HUMAN
145	10.29	10.29	49.7	42.42	38.18	sp|P30050|RL12_HUMAN	60S ribosomal protein L12 OS=Homo sapiens GN=RPL12 PE=1 SV=1	HUMAN	6	sp	P30050	RL12_HUMAN
146	10.27	10.27	28.74	21.26	21.26	sp|P40925|MDHC_HUMAN	Malate dehydrogenase, cytoplasmic OS=Homo sapiens GN=MDH1 PE=1 SV=4	HUMAN	7	sp	P40925	MDHC_HUMAN
147	10.25	10.25	27.78	20.37	20.37	tr|A0A0A0MT30|A0A0A0MT30_HUMAN	Aldo-keto reductase family 1 member C1 OS=Homo sapiens GN=AKR1C1 PE=1 SV=1	HUMAN	6	tr	A0A0A0MT30	A0A0A0MT30_HUMAN
148	10.22	10.22	45.98	29.02	25.89	sp|P30041|PRDX6_HUMAN	Peroxiredoxin-6 OS=Homo sapiens GN=PRDX6 PE=1 SV=3	HUMAN	6	sp	P30041	PRDX6_HUMAN
149	10.2	10.2	50.71	50.71	50.71	sp|P07737|PROF1_HUMAN	Profilin-1 OS=Homo sapiens GN=PFN1 PE=1 SV=2	HUMAN	6	sp	P07737	PROF1_HUMAN
150	10.17	10.17	29.62	13.37	10.88	sp|P40939|ECHA_HUMAN	Trifunctional enzyme subunit alpha, mitochondrial OS=Homo sapiens GN=HADHA PE=1 SV=2	HUMAN	5	sp	P40939	ECHA_HUMAN
151	10.15	10.18	37.1	26.61	24.19	sp|O14818|PSA7_HUMAN	Proteasome subunit alpha type-7 OS=Homo sapiens GN=PSMA7 PE=1 SV=1	HUMAN	5	sp	O14818	PSA7_HUMAN
152	10.11	10.11	14.12	9.807	9.807	sp|Q6EMK4|VASN_HUMAN	Vasorin OS=Homo sapiens GN=VASN PE=1 SV=1	HUMAN	5	sp	Q6EMK4	VASN_HUMAN
153	10.09	10.09	32.55	18.12	14.77	sp|P05141|ADT2_HUMAN	ADP/ATP translocase 2 OS=Homo sapiens GN=SLC25A5 PE=1 SV=7	HUMAN	5	sp	P05141	ADT2_HUMAN
154	10.04	10.04	43.18	30.68	27.27	sp|P28070|PSB4_HUMAN	Proteasome subunit beta type-4 OS=Homo sapiens GN=PSMB4 PE=1 SV=4	HUMAN	7	sp	P28070	PSB4_HUMAN
155	9.99	10.03	39.89	33.71	29.78	sp|P62913|RL11_HUMAN	60S ribosomal protein L11 OS=Homo sapiens GN=RPL11 PE=1 SV=2	HUMAN	7	sp	P62913	RL11_HUMAN
156	9.98	9.98	12.54	6.83	6.014	sp|O94985|CSTN1_HUMAN	Calsyntenin-1 OS=Homo sapiens GN=CLSTN1 PE=1 SV=1	HUMAN	5	sp	O94985	CSTN1_HUMAN
157	9.83	9.83	28.6	14.8	12	sp|P05155|IC1_HUMAN	Plasma protease C1 inhibitor OS=Homo sapiens GN=SERPING1 PE=1 SV=2	HUMAN	5	sp	P05155	IC1_HUMAN
158	9.79	9.79	11.02	6.105	5.314	tr|G3V511|G3V511_HUMAN	Latent-transforming growth factor beta-binding protein 2 OS=Homo sapiens GN=LTBP2 PE=1 SV=1	HUMAN	8	tr	G3V511	G3V511_HUMAN
159	9.41	9.41	37.5	31.48	31.48	sp|P51148|RAB5C_HUMAN	Ras-related protein Rab-5C OS=Homo sapiens GN=RAB5C PE=1 SV=2	HUMAN	6	sp	P51148	RAB5C_HUMAN
160	9.27	9.27	20.09	14.57	11.26	sp|P36957|ODO2_HUMAN	Dihydrolipoyllysine-residue succinyltransferase component of 2-oxoglutarate dehydrogenase complex, mitochondrial OS=Homo sapiens GN=DLST PE=1 SV=4	HUMAN	5	sp	P36957	ODO2_HUMAN
161	9.19	9.19	46.23	35.18	29.65	sp|P37802|TAGL2_HUMAN	Transgelin-2 OS=Homo sapiens GN=TAGLN2 PE=1 SV=3	HUMAN	7	sp	P37802	TAGL2_HUMAN
162	9.19	9.19	26.47	21.18	19.12	tr|H7C3G9|H7C3G9_HUMAN	N-acetyl-D-glucosamine kinase OS=Homo sapiens GN=NAGK PE=1 SV=2	HUMAN	5	tr	H7C3G9	H7C3G9_HUMAN
163	9.14	9.14	26.99	20	13.01	sp|P11413|G6PD_HUMAN	Glucose-6-phosphate 1-dehydrogenase OS=Homo sapiens GN=G6PD PE=1 SV=4	HUMAN	6	sp	P11413	G6PD_HUMAN
164	9.02	9.02	21.74	11.04	11.04	tr|H7C410|H7C410_HUMAN	Glypican-1 (Fragment) OS=Homo sapiens GN=GPC1 PE=1 SV=1	HUMAN	5	tr	H7C410	H7C410_HUMAN
165	8.98	9.11	26.19	11.51	9.722	sp|P34897|GLYM_HUMAN	Serine hydroxymethyltransferase, mitochondrial OS=Homo sapiens GN=SHMT2 PE=1 SV=3	HUMAN	5	sp	P34897	GLYM_HUMAN
166	8.97	8.97	21.09	17.69	13.27	sp|P06748|NPM_HUMAN	Nucleophosmin OS=Homo sapiens GN=NPM1 PE=1 SV=2	HUMAN	4	sp	P06748	NPM_HUMAN
167	8.92	8.92	28.04	18.82	14.9	sp|P07954|FUMH_HUMAN	Fumarate hydratase, mitochondrial OS=Homo sapiens GN=FH PE=1 SV=3	HUMAN	5	sp	P07954	FUMH_HUMAN
168	8.91	8.92	35.91	19.55	19.09	sp|P16035|TIMP2_HUMAN	Metalloproteinase inhibitor 2 OS=Homo sapiens GN=TIMP2 PE=1 SV=2	HUMAN	6	sp	P16035	TIMP2_HUMAN
169	8.72	8.72	18.04	16.14	16.14	sp|P15121|ALDR_HUMAN	Aldose reductase OS=Homo sapiens GN=AKR1B1 PE=1 SV=3	HUMAN	6	sp	P15121	ALDR_HUMAN
170	8.64	8.64	59.21	40.13	34.87	tr|J3KND3|J3KND3_HUMAN	Myosin light polypeptide 6 OS=Homo sapiens GN=MYL6 PE=1 SV=1	HUMAN	4	tr	J3KND3	J3KND3_HUMAN
171	8.58	8.58	9.617	2.795	1.739	sp|Q07954|LRP1_HUMAN	Prolow-density lipoprotein receptor-related protein 1 OS=Homo sapiens GN=LRP1 PE=1 SV=2	HUMAN	6	sp	Q07954	LRP1_HUMAN
172	8.51	8.51	45.18	36.14	27.11	tr|U3KQK0|U3KQK0_HUMAN	Histone H2B OS=Homo sapiens GN=HIST1H2BN PE=1 SV=1	HUMAN	8	tr	U3KQK0	U3KQK0_HUMAN
173	8.48	8.48	67.65	50	50	sp|P61604|CH10_HUMAN	10 kDa heat shock protein, mitochondrial OS=Homo sapiens GN=HSPE1 PE=1 SV=2	HUMAN	6	sp	P61604	CH10_HUMAN
174	8.47	8.47	51.46	51.46	51.46	sp|P62805|H4_HUMAN	Histone H4 OS=Homo sapiens GN=HIST1H4A PE=1 SV=2	HUMAN	7	sp	P62805	H4_HUMAN
175	8.43	8.43	44.32	18.56	15.91	sp|P61247|RS3A_HUMAN	40S ribosomal protein S3a OS=Homo sapiens GN=RPS3A PE=1 SV=2	HUMAN	5	sp	P61247	RS3A_HUMAN
176	8.4	8.4	23.01	6.168	5.101	sp|P11216|PYGB_HUMAN	Glycogen phosphorylase, brain form OS=Homo sapiens GN=PYGB PE=1 SV=5	HUMAN	4	sp	P11216	PYGB_HUMAN
177	8.39	8.39	52.74	33.33	33.33	sp|P49721|PSB2_HUMAN	Proteasome subunit beta type-2 OS=Homo sapiens GN=PSMB2 PE=1 SV=1	HUMAN	7	sp	P49721	PSB2_HUMAN
178	8.36	8.36	11.74	7.686	4.059	sp|Q8IUX7|AEBP1_HUMAN	Adipocyte enhancer-binding protein 1 OS=Homo sapiens GN=AEBP1 PE=1 SV=1	HUMAN	4	sp	Q8IUX7	AEBP1_HUMAN
179	8.36	8.36	36.75	26.15	18.73	sp|P21796|VDAC1_HUMAN	Voltage-dependent anion-selective channel protein 1 OS=Homo sapiens GN=VDAC1 PE=1 SV=2	HUMAN	5	sp	P21796	VDAC1_HUMAN
180	8.33	8.33	25.58	9.406	7.921	sp|O75083|WDR1_HUMAN	WD repeat-containing protein 1 OS=Homo sapiens GN=WDR1 PE=1 SV=4	HUMAN	4	sp	O75083	WDR1_HUMAN
181	8.28	8.28	23.53	17.03	17.03	tr|A0A0A6YY95|A0A0A6YY95_HUMAN	C-type lectin domain family 11 member A OS=Homo sapiens GN=CLEC11A PE=1 SV=1	HUMAN	5	tr	A0A0A6YY95	A0A0A6YY95_HUMAN
182	8.28	8.28	18.58	12.84	12.84	sp|P00390|GSHR_HUMAN	Glutathione reductase, mitochondrial OS=Homo sapiens GN=GSR PE=1 SV=2	HUMAN	5	sp	P00390	GSHR_HUMAN
183	8.27	9.34	20.69	9.579	9.579	tr|A6XMV9|A6XMV9_HUMAN	Protease serine 2 preproprotein OS=Homo sapiens GN=PRSS3P2 PE=2 SV=1	HUMAN	8	tr	A6XMV9	A6XMV9_HUMAN
184	8.2	8.2	23.78	14.86	12.24	sp|Q16555|DPYL2_HUMAN	Dihydropyrimidinase-related protein 2 OS=Homo sapiens GN=DPYSL2 PE=1 SV=1	HUMAN	6	sp	Q16555	DPYL2_HUMAN
185	8.04	8.04	13.89	4.436	4.436	sp|Q14112|NID2_HUMAN	Nidogen-2 OS=Homo sapiens GN=NID2 PE=1 SV=3	HUMAN	5	sp	Q14112	NID2_HUMAN
186	8.03	8.03	24.78	23.89	23.89	sp|P16401|H15_HUMAN	Histone H1.5 OS=Homo sapiens GN=HIST1H1B PE=1 SV=3	HUMAN	6	sp	P16401	H15_HUMAN
187	8.01	8.01	24.33	20.53	20.53	tr|C9J9K3|C9J9K3_HUMAN	40S ribosomal protein SA (Fragment) OS=Homo sapiens GN=RPSA PE=1 SV=4	HUMAN	4	tr	C9J9K3	C9J9K3_HUMAN
188	7.99	7.99	26.95	24.47	16.31	sp|Q16270|IBP7_HUMAN	Insulin-like growth factor-binding protein 7 OS=Homo sapiens GN=IGFBP7 PE=1 SV=1	HUMAN	4	sp	Q16270	IBP7_HUMAN
189	7.94	7.94	25	25	17.06	tr|G3V5Z7|G3V5Z7_HUMAN	Proteasome subunit alpha type OS=Homo sapiens GN=PSMA6 PE=1 SV=1	HUMAN	5	tr	G3V5Z7	G3V5Z7_HUMAN
190	7.87	7.87	55.37	33.22	17.45	tr|J3KPX7|J3KPX7_HUMAN	Prohibitin-2 OS=Homo sapiens GN=PHB2 PE=1 SV=2	HUMAN	4	tr	J3KPX7	J3KPX7_HUMAN
191	7.87	7.87	28.65	12.52	10.82	sp|P04040|CATA_HUMAN	Catalase OS=Homo sapiens GN=CAT PE=1 SV=3	HUMAN	5	sp	P04040	CATA_HUMAN
192	7.83	7.89	11.72	4.995	4.087	sp|P53396|ACLY_HUMAN	ATP-citrate synthase OS=Homo sapiens GN=ACLY PE=1 SV=3	HUMAN	4	sp	P53396	ACLY_HUMAN
193	7.77	7.77	55.47	46.09	41.41	sp|P62987|RL40_HUMAN	Ubiquitin-60S ribosomal protein L40 OS=Homo sapiens GN=UBA52 PE=1 SV=2	HUMAN	7	sp	P62987	RL40_HUMAN
194	7.68	7.68	22.99	15.33	11.49	sp|P25789|PSA4_HUMAN	Proteasome subunit alpha type-4 OS=Homo sapiens GN=PSMA4 PE=1 SV=1	HUMAN	4	sp	P25789	PSA4_HUMAN
195	7.66	7.66	18.72	7.463	6.377	sp|O00469|PLOD2_HUMAN	Procollagen-lysine,2-oxoglutarate 5-dioxygenase 2 OS=Homo sapiens GN=PLOD2 PE=1 SV=2	HUMAN	4	sp	O00469	PLOD2_HUMAN
196	7.62	7.63	36.28	33.95	30.23	sp|O75396|SC22B_HUMAN	Vesicle-trafficking protein SEC22b OS=Homo sapiens GN=SEC22B PE=1 SV=4	HUMAN	5	sp	O75396	SC22B_HUMAN
197	7.55	8.29	13.32	12.38	11.21	sp|O14498|ISLR_HUMAN	Immunoglobulin superfamily containing leucine-rich repeat protein OS=Homo sapiens GN=ISLR PE=1 SV=1	HUMAN	5	sp	O14498	ISLR_HUMAN
198	7.48	7.48	14.27	8.79	6.333	sp|P22314|UBA1_HUMAN	Ubiquitin-like modifier-activating enzyme 1 OS=Homo sapiens GN=UBA1 PE=1 SV=3	HUMAN	5	sp	P22314	UBA1_HUMAN
199	7.37	7.37	33.33	21.27	18.41	sp|O43852|CALU_HUMAN	Calumenin OS=Homo sapiens GN=CALU PE=1 SV=2	HUMAN	5	sp	O43852	CALU_HUMAN
200	7.25	7.25	54.79	36.99	36.99	sp|P62249|RS16_HUMAN	40S ribosomal protein S16 OS=Homo sapiens GN=RPS16 PE=1 SV=2	HUMAN	6	sp	P62249	RS16_HUMAN
201	7.17	7.17	43.41	34.15	34.15	sp|P49720|PSB3_HUMAN	Proteasome subunit beta type-3 OS=Homo sapiens GN=PSMB3 PE=1 SV=2	HUMAN	5	sp	P49720	PSB3_HUMAN
202	7.11	7.11	16.43	10.14	10.14	sp|Q16658|FSCN1_HUMAN	Fascin OS=Homo sapiens GN=FSCN1 PE=1 SV=3	HUMAN	5	sp	Q16658	FSCN1_HUMAN
203	7.09	7.09	22.71	12.93	12.93	sp|P63244|GBLP_HUMAN	Guanine nucleotide-binding protein subunit beta-2-like 1 OS=Homo sapiens GN=GNB2L1 PE=1 SV=3	HUMAN	4	sp	P63244	GBLP_HUMAN
204	7.08	7.08	24.22	19.53	16.8	sp|P30048|PRDX3_HUMAN	Thioredoxin-dependent peroxide reductase, mitochondrial OS=Homo sapiens GN=PRDX3 PE=1 SV=3	HUMAN	4	sp	P30048	PRDX3_HUMAN
205	7.04	7.04	40	18.65	11.46	sp|P50395|GDIB_HUMAN	Rab GDP dissociation inhibitor beta OS=Homo sapiens GN=GDI2 PE=1 SV=2	HUMAN	5	sp	P50395	GDIB_HUMAN
206	6.89	6.89	9.825	7.281	5.702	sp|Q16531|DDB1_HUMAN	DNA damage-binding protein 1 OS=Homo sapiens GN=DDB1 PE=1 SV=1	HUMAN	5	sp	Q16531	DDB1_HUMAN
207	6.84	6.84	20	9.907	7.477	tr|K7ELL7|K7ELL7_HUMAN	Glucosidase 2 subunit beta OS=Homo sapiens GN=PRKCSH PE=1 SV=1	HUMAN	5	tr	K7ELL7	K7ELL7_HUMAN
208	6.8	7.03	34.84	16.76	7.91	sp|P40227|TCPZ_HUMAN	T-complex protein 1 subunit zeta OS=Homo sapiens GN=CCT6A PE=1 SV=3	HUMAN	4	sp	P40227	TCPZ_HUMAN
209	6.78	6.78	45.52	31.72	31.72	sp|P61254|RL26_HUMAN	60S ribosomal protein L26 OS=Homo sapiens GN=RPL26 PE=1 SV=1	HUMAN	5	sp	P61254	RL26_HUMAN
210	6.76	6.76	46.48	30.52	18.31	sp|P48047|ATPO_HUMAN	ATP synthase subunit O, mitochondrial OS=Homo sapiens GN=ATP5O PE=1 SV=1	HUMAN	4	sp	P48047	ATPO_HUMAN
211	6.75	6.75	33.51	29.26	25.53	tr|Q5JR95|Q5JR95_HUMAN	40S ribosomal protein S8 OS=Homo sapiens GN=RPS8 PE=1 SV=1	HUMAN	5	tr	Q5JR95	Q5JR95_HUMAN
212	6.75	6.75	25.31	20.33	20.33	sp|P28066|PSA5_HUMAN	Proteasome subunit alpha type-5 OS=Homo sapiens GN=PSMA5 PE=1 SV=3	HUMAN	4	sp	P28066	PSA5_HUMAN
213	6.72	8.85	35.86	26.77	18.69	sp|P32119|PRDX2_HUMAN	Peroxiredoxin-2 OS=Homo sapiens GN=PRDX2 PE=1 SV=5	HUMAN	7	sp	P32119	PRDX2_HUMAN
214	6.52	6.52	28	22.46	16.62	sp|P14550|AK1A1_HUMAN	Alcohol dehydrogenase [NADP(+)] OS=Homo sapiens GN=AKR1A1 PE=1 SV=3	HUMAN	5	sp	P14550	AK1A1_HUMAN
215	6.52	6.52	21.39	15.96	13.86	sp|Q53FA7|QORX_HUMAN	Quinone oxidoreductase PIG3 OS=Homo sapiens GN=TP53I3 PE=1 SV=2	HUMAN	4	sp	Q53FA7	QORX_HUMAN
216	6.48	6.49	47.58	21.77	21.77	sp|P18124|RL7_HUMAN	60S ribosomal protein L7 OS=Homo sapiens GN=RPL7 PE=1 SV=1	HUMAN	5	sp	P18124	RL7_HUMAN
217	6.43	13.95	54.47	46.75	28.46	sp|P31946|1433B_HUMAN	14-3-3 protein beta/alpha OS=Homo sapiens GN=YWHAB PE=1 SV=3	HUMAN	7	sp	P31946	1433B_HUMAN
218	6.39	6.41	50.27	38.5	24.6	tr|H0Y7A7|H0Y7A7_HUMAN	Calmodulin (Fragment) OS=Homo sapiens GN=CALM2 PE=1 SV=1	HUMAN	3	tr	H0Y7A7	H0Y7A7_HUMAN
219	6.37	6.37	37.07	21.46	13.17	sp|P04792|HSPB1_HUMAN	Heat shock protein beta-1 OS=Homo sapiens GN=HSPB1 PE=1 SV=2	HUMAN	3	sp	P04792	HSPB1_HUMAN
220	6.35	8.42	22.59	11.3	7.037	sp|Q16610|ECM1_HUMAN	Extracellular matrix protein 1 OS=Homo sapiens GN=ECM1 PE=1 SV=2	HUMAN	4	sp	Q16610	ECM1_HUMAN
221	6.35	7.07	13.05	11.08	4.926	sp|Q9NRN5|OLFL3_HUMAN	Olfactomedin-like protein 3 OS=Homo sapiens GN=OLFML3 PE=2 SV=1	HUMAN	3	sp	Q9NRN5	OLFL3_HUMAN
222	6.33	7.42	17.93	5.315	2.862	sp|P08572|CO4A2_HUMAN	Collagen alpha-2(IV) chain OS=Homo sapiens GN=COL4A2 PE=1 SV=4	HUMAN	4	sp	P08572	CO4A2_HUMAN
223	6.25	6.25	17.73	2.695	2.128	tr|A0A0A0MRV0|A0A0A0MRV0_HUMAN	Ribosome-binding protein 1 OS=Homo sapiens GN=RRBP1 PE=1 SV=1	HUMAN	3	tr	A0A0A0MRV0	A0A0A0MRV0_HUMAN
224	6.25	6.25	28.27	12.66	6.118	sp|P55084|ECHB_HUMAN	Trifunctional enzyme subunit beta, mitochondrial OS=Homo sapiens GN=HADHB PE=1 SV=3	HUMAN	3	sp	P55084	ECHB_HUMAN
225	6.22	6.22	40.2	22.06	18.14	tr|E9PK25|E9PK25_HUMAN	Cofilin-1 OS=Homo sapiens GN=CFL1 PE=1 SV=1	HUMAN	3	tr	E9PK25	E9PK25_HUMAN
226	6.21	6.21	21.01	18.99	15.19	tr|A0A087X1N8|A0A087X1N8_HUMAN	Serpin B6 OS=Homo sapiens GN=SERPINB6 PE=1 SV=1	HUMAN	5	tr	A0A087X1N8	A0A087X1N8_HUMAN
227	6.2	11.58	44.72	33.74	24.8	sp|Q04917|1433F_HUMAN	14-3-3 protein eta OS=Homo sapiens GN=YWHAH PE=1 SV=4	HUMAN	6	sp	Q04917	1433F_HUMAN
228	6.19	6.2	15.66	6.767	6.015	sp|P05556|ITB1_HUMAN	Integrin beta-1 OS=Homo sapiens GN=ITGB1 PE=1 SV=2	HUMAN	4	sp	P05556	ITB1_HUMAN
229	6.15	6.15	26.33	13.27	9.956	sp|P49411|EFTU_HUMAN	Elongation factor Tu, mitochondrial OS=Homo sapiens GN=TUFM PE=1 SV=2	HUMAN	3	sp	P49411	EFTU_HUMAN
230	6.13	6.18	7.57	3.551	2.991	sp|Q13308|PTK7_HUMAN	Inactive tyrosine-protein kinase 7 OS=Homo sapiens GN=PTK7 PE=1 SV=2	HUMAN	3	sp	Q13308	PTK7_HUMAN
231	6.13	6.13	24.12	18.2	11.84	sp|Q9Y265|RUVB1_HUMAN	RuvB-like 1 OS=Homo sapiens GN=RUVBL1 PE=1 SV=1	HUMAN	4	sp	Q9Y265	RUVB1_HUMAN
232	6.13	6.13	30.27	24.15	10.2	sp|P45880|VDAC2_HUMAN	Voltage-dependent anion-selective channel protein 2 OS=Homo sapiens GN=VDAC2 PE=1 SV=2	HUMAN	3	sp	P45880	VDAC2_HUMAN
233	6.12	6.12	32.62	21.65	21.65	sp|Q13011|ECH1_HUMAN	Delta(3,5)-Delta(2,4)-dienoyl-CoA isomerase, mitochondrial OS=Homo sapiens GN=ECH1 PE=1 SV=2	HUMAN	4	sp	Q13011	ECH1_HUMAN
234	6.12	6.12	18.64	12.6	9.711	sp|P26022|PTX3_HUMAN	Pentraxin-related protein PTX3 OS=Homo sapiens GN=PTX3 PE=1 SV=3	HUMAN	3	sp	P26022	PTX3_HUMAN
235	6.09	6.09	12.66	6.639	4.564	tr|B4DR61|B4DR61_HUMAN	Protein transport protein Sec61 subunit alpha isoform 1 OS=Homo sapiens GN=SEC61A1 PE=1 SV=1	HUMAN	3	tr	B4DR61	B4DR61_HUMAN
236	6.09	6.09	43.05	17.88	17.88	sp|P62263|RS14_HUMAN	40S ribosomal protein S14 OS=Homo sapiens GN=RPS14 PE=1 SV=3	HUMAN	3	sp	P62263	RS14_HUMAN
237	6.04	6.04	20.21	7.917	6.042	sp|Q92743|HTRA1_HUMAN	Serine protease HTRA1 OS=Homo sapiens GN=HTRA1 PE=1 SV=1	HUMAN	3	sp	Q92743	HTRA1_HUMAN
238	6.03	6.04	21.75	14.5	13.29	sp|Q15293|RCN1_HUMAN	Reticulocalbin-1 OS=Homo sapiens GN=RCN1 PE=1 SV=1	HUMAN	4	sp	Q15293	RCN1_HUMAN
239	6.01	17.2	74.01	50.66	34.8	tr|A0A087WWU8|A0A087WWU8_HUMAN	Tropomyosin alpha-3 chain OS=Homo sapiens GN=TPM3 PE=1 SV=1	HUMAN	9	tr	A0A087WWU8	A0A087WWU8_HUMAN
240	6	6	16	10.6	7.8	tr|E7ER27|E7ER27_HUMAN	Peroxisomal multifunctional enzyme type 2 OS=Homo sapiens GN=HSD17B4 PE=1 SV=3	HUMAN	3	tr	E7ER27	E7ER27_HUMAN
241	6	6	32.42	18.72	14.16	sp|P10412|H14_HUMAN	Histone H1.4 OS=Homo sapiens GN=HIST1H1E PE=1 SV=2	HUMAN	3	sp	P10412	H14_HUMAN
242	6	6	20.97	10.64	10.64	sp|Q14914|PTGR1_HUMAN	Prostaglandin reductase 1 OS=Homo sapiens GN=PTGR1 PE=1 SV=2	HUMAN	3	sp	Q14914	PTGR1_HUMAN
243	6	6	12.31	7.127	7.127	sp|Q9Y230|RUVB2_HUMAN	RuvB-like 2 OS=Homo sapiens GN=RUVBL2 PE=1 SV=3	HUMAN	3	sp	Q9Y230	RUVB2_HUMAN
244	6	6	29.07	29.07	29.07	sp|P80723|BASP1_HUMAN	Brain acid soluble protein 1 OS=Homo sapiens GN=BASP1 PE=1 SV=2	HUMAN	3	sp	P80723	BASP1_HUMAN
245	5.95	5.95	42.64	35.66	30.23	sp|Q9BTM1|H2AJ_HUMAN	Histone H2A.J OS=Homo sapiens GN=H2AFJ PE=1 SV=1	HUMAN	3	sp	Q9BTM1	H2AJ_HUMAN
246	5.84	5.86	25.91	21.26	21.26	sp|P00387|NB5R3_HUMAN	NADH-cytochrome b5 reductase 3 OS=Homo sapiens GN=CYB5R3 PE=1 SV=3	HUMAN	4	sp	P00387	NB5R3_HUMAN
247	5.82	5.82	14.03	7.014	7.014	sp|Q9BRK3|MXRA8_HUMAN	Matrix-remodeling-associated protein 8 OS=Homo sapiens GN=MXRA8 PE=2 SV=1	HUMAN	3	sp	Q9BRK3	MXRA8_HUMAN
248	5.82	5.82	30.25	22.69	22.69	sp|P60866|RS20_HUMAN	40S ribosomal protein S20 OS=Homo sapiens GN=RPS20 PE=1 SV=1	HUMAN	3	sp	P60866	RS20_HUMAN
249	5.81	5.81	16.01	4.885	4.885	tr|C9JIF9|C9JIF9_HUMAN	Acylamino-acid-releasing enzyme OS=Homo sapiens GN=APEH PE=1 SV=1	HUMAN	3	tr	C9JIF9	C9JIF9_HUMAN
250	5.78	5.78	60.8	28	28	sp|P62851|RS25_HUMAN	40S ribosomal protein S25 OS=Homo sapiens GN=RPS25 PE=1 SV=1	HUMAN	4	sp	P62851	RS25_HUMAN
251	5.77	5.77	35.19	25.93	25.93	tr|H3BQB1|H3BQB1_HUMAN	Adenine phosphoribosyltransferase (Fragment) OS=Homo sapiens GN=APRT PE=1 SV=1	HUMAN	4	tr	H3BQB1	H3BQB1_HUMAN
252	5.69	5.69	43.73	17.49	9.886	sp|P62701|RS4X_HUMAN	40S ribosomal protein S4, X isoform OS=Homo sapiens GN=RPS4X PE=1 SV=2	HUMAN	3	sp	P62701	RS4X_HUMAN
253	5.68	5.68	8.29	2.264	1.602	sp|P35555|FBN1_HUMAN	Fibrillin-1 OS=Homo sapiens GN=FBN1 PE=1 SV=3	HUMAN	5	sp	P35555	FBN1_HUMAN
254	5.62	5.62	38.42	14.04	10.84	sp|P60842|IF4A1_HUMAN	Eukaryotic initiation factor 4A-I OS=Homo sapiens GN=EIF4A1 PE=1 SV=1	HUMAN	3	sp	P60842	IF4A1_HUMAN
255	5.6	5.6	9.642	2.44	1.299	sp|Q9Y490|TLN1_HUMAN	Talin-1 OS=Homo sapiens GN=TLN1 PE=1 SV=3	HUMAN	3	sp	Q9Y490	TLN1_HUMAN
256	5.59	5.59	14.5	4.58	3.381	sp|P19367|HXK1_HUMAN	Hexokinase-1 OS=Homo sapiens GN=HK1 PE=1 SV=3	HUMAN	3	sp	P19367	HXK1_HUMAN
257	5.59	5.59	29.59	12.88	9.315	sp|P30447|1A23_HUMAN	HLA class I histocompatibility antigen, A-23 alpha chain OS=Homo sapiens GN=HLA-A PE=1 SV=1	HUMAN	3	sp	P30447	1A23_HUMAN
258	5.52	5.52	12.99	7.91	7.91	tr|E7ER44|E7ER44_HUMAN	Lactotransferrin OS=Homo sapiens GN=LTF PE=1 SV=1	HUMAN	5	tr	E7ER44	E7ER44_HUMAN
259	5.52	5.52	27.99	18.07	11.45	sp|Q99536|VAT1_HUMAN	Synaptic vesicle membrane protein VAT-1 homolog OS=Homo sapiens GN=VAT1 PE=1 SV=2	HUMAN	3	sp	Q99536	VAT1_HUMAN
260	5.49	5.49	20.49	11.97	10.75	sp|Q12805|FBLN3_HUMAN	EGF-containing fibulin-like extracellular matrix protein 1 OS=Homo sapiens GN=EFEMP1 PE=1 SV=2	HUMAN	5	sp	Q12805	FBLN3_HUMAN
261	5.47	5.47	38.65	22.22	16.91	sp|P51149|RAB7A_HUMAN	Ras-related protein Rab-7a OS=Homo sapiens GN=RAB7A PE=1 SV=1	HUMAN	3	sp	P51149	RAB7A_HUMAN
262	5.47	5.47	35.15	20	20	tr|A0A087WZH7|A0A087WZH7_HUMAN	Myristoylated alanine-rich C-kinase substrate OS=Homo sapiens GN=MARCKS PE=1 SV=1	HUMAN	3	tr	A0A087WZH7	A0A087WZH7_HUMAN
263	5.47	5.47	20	13.52	9.577	sp|P04899|GNAI2_HUMAN	Guanine nucleotide-binding protein G(i) subunit alpha-2 OS=Homo sapiens GN=GNAI2 PE=1 SV=3	HUMAN	3	sp	P04899	GNAI2_HUMAN
264	5.42	5.42	31.05	18.95	18.95	tr|J3QQ67|J3QQ67_HUMAN	60S ribosomal protein L18 (Fragment) OS=Homo sapiens GN=RPL18 PE=1 SV=1	HUMAN	3	tr	J3QQ67	J3QQ67_HUMAN
265	5.39	5.39	36.49	19.59	18.92	tr|J3KMX5|J3KMX5_HUMAN	40S ribosomal protein S13 OS=Homo sapiens GN=RPS13 PE=1 SV=1	HUMAN	3	tr	J3KMX5	J3KMX5_HUMAN
266	5.35	5.35	14.12	8.471	8.471	tr|D6RGI3|D6RGI3_HUMAN	Septin 11, isoform CRA_b OS=Homo sapiens GN=SEPT11 PE=1 SV=1	HUMAN	3	tr	D6RGI3	D6RGI3_HUMAN
267	5.33	5.33	12.5	10.53	6.798	sp|P39656|OST48_HUMAN	Dolichyl-diphosphooligosaccharide--protein glycosyltransferase 48 kDa subunit OS=Homo sapiens GN=DDOST PE=1 SV=4	HUMAN	3	sp	P39656	OST48_HUMAN
268	5.31	5.31	24.75	24.75	15.15	tr|H3BSC1|H3BSC1_HUMAN	Ras-related protein Rab-11A OS=Homo sapiens GN=RAB11A PE=1 SV=1	HUMAN	3	tr	H3BSC1	H3BSC1_HUMAN
269	5.25	5.25	19.49	12.82	12.82	sp|Q6NZI2|PTRF_HUMAN	Polymerase I and transcript release factor OS=Homo sapiens GN=PTRF PE=1 SV=1	HUMAN	3	sp	Q6NZI2	PTRF_HUMAN
270	5.24	5.24	31.44	22.16	13.4	sp|P46781|RS9_HUMAN	40S ribosomal protein S9 OS=Homo sapiens GN=RPS9 PE=1 SV=3	HUMAN	3	sp	P46781	RS9_HUMAN
271	5.2	5.2	31.43	31.43	22.86	sp|P10599|THIO_HUMAN	Thioredoxin OS=Homo sapiens GN=TXN PE=1 SV=3	HUMAN	3	sp	P10599	THIO_HUMAN
272	5.17	5.17	29.14	24.57	24.57	sp|P02792|FRIL_HUMAN	Ferritin light chain OS=Homo sapiens GN=FTL PE=1 SV=2	HUMAN	4	sp	P02792	FRIL_HUMAN
273	5.15	5.17	13.97	7.278	4.512	sp|P21980|TGM2_HUMAN	Protein-glutamine gamma-glutamyltransferase 2 OS=Homo sapiens GN=TGM2 PE=1 SV=2	HUMAN	3	sp	P21980	TGM2_HUMAN
274	5.15	5.15	24.21	5.927	4.161	sp|Q05682|CALD1_HUMAN	Caldesmon OS=Homo sapiens GN=CALD1 PE=1 SV=3	HUMAN	3	sp	Q05682	CALD1_HUMAN
275	5.14	5.14	22.6	13.25	10.65	sp|P35613|BASI_HUMAN	Basigin OS=Homo sapiens GN=BSG PE=1 SV=2	HUMAN	3	sp	P35613	BASI_HUMAN
276	5.13	5.15	23.92	18.04	18.04	sp|P38117|ETFB_HUMAN	Electron transfer flavoprotein subunit beta OS=Homo sapiens GN=ETFB PE=1 SV=3	HUMAN	4	sp	P38117	ETFB_HUMAN
277	5.13	5.13	37.68	24.64	14.98	sp|P01033|TIMP1_HUMAN	Metalloproteinase inhibitor 1 OS=Homo sapiens GN=TIMP1 PE=1 SV=1	HUMAN	6	sp	P01033	TIMP1_HUMAN
278	5.1	5.1	17.17	17.17	13.73	tr|B5MDF5|B5MDF5_HUMAN	GTP-binding nuclear protein Ran OS=Homo sapiens GN=RAN PE=1 SV=1	HUMAN	3	tr	B5MDF5	B5MDF5_HUMAN
279	5.08	5.08	22.63	10.02	8.163	sp|P50991|TCPD_HUMAN	T-complex protein 1 subunit delta OS=Homo sapiens GN=CCT4 PE=1 SV=4	HUMAN	4	sp	P50991	TCPD_HUMAN
280	5.07	5.07	13.57	11.24	11.24	sp|P22692|IBP4_HUMAN	Insulin-like growth factor-binding protein 4 OS=Homo sapiens GN=IGFBP4 PE=1 SV=2	HUMAN	3	sp	P22692	IBP4_HUMAN
281	5.04	5.63	8.235	4.429	2.699	sp|Q6YHK3|CD109_HUMAN	CD109 antigen OS=Homo sapiens GN=CD109 PE=1 SV=2	HUMAN	3	sp	Q6YHK3	CD109_HUMAN
282	5.03	5.05	45.55	34.52	21	tr|F8VWS0|F8VWS0_HUMAN	60S acidic ribosomal protein P0 OS=Homo sapiens GN=RPLP0 PE=1 SV=1	HUMAN	4	tr	F8VWS0	F8VWS0_HUMAN
283	5.03	5.03	13.96	5.495	2.198	sp|Q7KZF4|SND1_HUMAN	Staphylococcal nuclease domain-containing protein 1 OS=Homo sapiens GN=SND1 PE=1 SV=1	HUMAN	2	sp	Q7KZF4	SND1_HUMAN
284	5.03	5.03	50.63	18.99	10.76	sp|P62280|RS11_HUMAN	40S ribosomal protein S11 OS=Homo sapiens GN=RPS11 PE=1 SV=3	HUMAN	3	sp	P62280	RS11_HUMAN
285	5.03	5.03	39.51	32.68	9.268	sp|P62820|RAB1A_HUMAN	Ras-related protein Rab-1A OS=Homo sapiens GN=RAB1A PE=1 SV=3	HUMAN	2	sp	P62820	RAB1A_HUMAN
286	4.99	7.7	13.67	9.892	9.892	sp|P17987|TCPA_HUMAN	T-complex protein 1 subunit alpha OS=Homo sapiens GN=TCP1 PE=1 SV=1	HUMAN	5	sp	P17987	TCPA_HUMAN
287	4.99	5.28	11.24	4.651	3.876	sp|Q9Y4K0|LOXL2_HUMAN	Lysyl oxidase homolog 2 OS=Homo sapiens GN=LOXL2 PE=1 SV=1	HUMAN	3	sp	Q9Y4K0	LOXL2_HUMAN
288	4.95	4.95	30.99	30.99	23.24	sp|P69905|HBA_HUMAN	Hemoglobin subunit alpha OS=Homo sapiens GN=HBA1 PE=1 SV=2	HUMAN	3	sp	P69905	HBA_HUMAN
289	4.92	4.92	12.35	5.902	2.732	tr|E9PLK3|E9PLK3_HUMAN	Puromycin-sensitive aminopeptidase OS=Homo sapiens GN=NPEPPS PE=1 SV=1	HUMAN	2	tr	E9PLK3	E9PLK3_HUMAN
290	4.9	4.9	36.46	19.49	10.83	sp|Q99436|PSB7_HUMAN	Proteasome subunit beta type-7 OS=Homo sapiens GN=PSMB7 PE=1 SV=1	HUMAN	4	sp	Q99436	PSB7_HUMAN
291	4.89	4.89	21.19	4.762	3.214	sp|P34932|HSP74_HUMAN	Heat shock 70 kDa protein 4 OS=Homo sapiens GN=HSPA4 PE=1 SV=4	HUMAN	2	sp	P34932	HSP74_HUMAN
292	4.87	4.87	31.29	23.81	23.81	sp|P68871|HBB_HUMAN	Hemoglobin subunit beta OS=Homo sapiens GN=HBB PE=1 SV=2	HUMAN	6	sp	P68871	HBB_HUMAN
293	4.83	4.83	25.61	20.07	13.49	sp|P00491|PNPH_HUMAN	Purine nucleoside phosphorylase OS=Homo sapiens GN=PNP PE=1 SV=2	HUMAN	3	sp	P00491	PNPH_HUMAN
294	4.82	4.82	47.06	37.65	37.65	tr|F5GXX5|F5GXX5_HUMAN	Dolichyl-diphosphooligosaccharide--protein glycosyltransferase subunit DAD1 OS=Homo sapiens GN=DAD1 PE=1 SV=1	HUMAN	4	tr	F5GXX5	F5GXX5_HUMAN
295	4.79	4.79	34.29	26.67	18.1	sp|P31949|S10AB_HUMAN	Protein S100-A11 OS=Homo sapiens GN=S100A11 PE=1 SV=2	HUMAN	4	sp	P31949	S10AB_HUMAN
296	4.75	4.75	30.19	14.01	14.01	sp|O75874|IDHC_HUMAN	Isocitrate dehydrogenase [NADP] cytoplasmic OS=Homo sapiens GN=IDH1 PE=1 SV=2	HUMAN	4	sp	O75874	IDHC_HUMAN
297	4.74	4.74	17.57	11.5	5.64	sp|P13489|RINI_HUMAN	Ribonuclease inhibitor OS=Homo sapiens GN=RNH1 PE=1 SV=2	HUMAN	2	sp	P13489	RINI_HUMAN
298	4.73	4.73	31.82	25	15.15	tr|K7EK07|K7EK07_HUMAN	Histone H3 (Fragment) OS=Homo sapiens GN=H3F3B PE=1 SV=1	HUMAN	4	tr	K7EK07	K7EK07_HUMAN
299	4.72	4.72	16.2	9.346	9.346	tr|B5MCX3|B5MCX3_HUMAN	Septin-2 OS=Homo sapiens GN=SEPT2 PE=1 SV=1	HUMAN	3	tr	B5MCX3	B5MCX3_HUMAN
300	4.72	4.72	16.61	10.86	10.86	sp|Q9HC38|GLOD4_HUMAN	Glyoxalase domain-containing protein 4 OS=Homo sapiens GN=GLOD4 PE=1 SV=1	HUMAN	3	sp	Q9HC38	GLOD4_HUMAN
301	4.68	4.68	15.12	5.649	4.175	sp|Q86YZ3|HORN_HUMAN	Hornerin OS=Homo sapiens GN=HRNR PE=1 SV=2	HUMAN	2	sp	Q86YZ3	HORN_HUMAN
302	4.68	4.68	44.8	23.98	20.36	tr|D6RAF8|D6RAF8_HUMAN	Heterogeneous nuclear ribonucleoprotein D0 (Fragment) OS=Homo sapiens GN=HNRNPD PE=1 SV=1	HUMAN	2	tr	D6RAF8	D6RAF8_HUMAN
303	4.66	20.04	31.83	19.81	18.1	sp|P08107|HSP71_HUMAN	Heat shock 70 kDa protein 1A/1B OS=Homo sapiens GN=HSPA1A PE=1 SV=5	HUMAN	12	sp	P08107	HSP71_HUMAN
304	4.64	4.64	20.33	17.43	17.43	sp|P78417|GSTO1_HUMAN	Glutathione S-transferase omega-1 OS=Homo sapiens GN=GSTO1 PE=1 SV=2	HUMAN	4	sp	P78417	GSTO1_HUMAN
305	4.64	4.64	23.35	16.74	16.74	sp|Q92520|FAM3C_HUMAN	Protein FAM3C OS=Homo sapiens GN=FAM3C PE=1 SV=1	HUMAN	4	sp	Q92520	FAM3C_HUMAN
306	4.6	6.45	18.56	10.31	8.591	sp|P17936|IBP3_HUMAN	Insulin-like growth factor-binding protein 3 OS=Homo sapiens GN=IGFBP3 PE=1 SV=2	HUMAN	3	sp	P17936	IBP3_HUMAN
307	4.58	4.58	10.61	5.108	3.733	tr|H3BS10|H3BS10_HUMAN	Beta-hexosaminidase OS=Homo sapiens GN=HEXA PE=1 SV=1	HUMAN	2	tr	H3BS10	H3BS10_HUMAN
308	4.54	4.54	28.89	23.33	11.67	sp|P18085|ARF4_HUMAN	ADP-ribosylation factor 4 OS=Homo sapiens GN=ARF4 PE=1 SV=3	HUMAN	3	sp	P18085	ARF4_HUMAN
309	4.5	4.5	20.17	10.22	7.735	sp|Q00325|MPCP_HUMAN	Phosphate carrier protein, mitochondrial OS=Homo sapiens GN=SLC25A3 PE=1 SV=2	HUMAN	4	sp	Q00325	MPCP_HUMAN
310	4.5	4.5	20.44	14.44	14.44	tr|B4DXW1|B4DXW1_HUMAN	Actin-related protein 3 OS=Homo sapiens GN=ACTR3 PE=1 SV=1	HUMAN	4	tr	B4DXW1	B4DXW1_HUMAN
311	4.47	4.47	12.65	4.694	2.999	tr|A0A0A0MT01|A0A0A0MT01_HUMAN	Gelsolin OS=Homo sapiens GN=GSN PE=1 SV=1	HUMAN	3	tr	A0A0A0MT01	A0A0A0MT01_HUMAN
312	4.39	5.26	33.6	20.55	11.86	sp|Q9Y696|CLIC4_HUMAN	Chloride intracellular channel protein 4 OS=Homo sapiens GN=CLIC4 PE=1 SV=4	HUMAN	4	sp	Q9Y696	CLIC4_HUMAN
313	4.37	4.37	17.88	12.69	10.19	sp|P55809|SCOT1_HUMAN	Succinyl-CoA:3-ketoacid coenzyme A transferase 1, mitochondrial OS=Homo sapiens GN=OXCT1 PE=1 SV=1	HUMAN	4	sp	P55809	SCOT1_HUMAN
314	4.37	4.37	8.635	7.229	7.229	tr|X6R8A1|X6R8A1_HUMAN	Carboxypeptidase OS=Homo sapiens GN=CTSA PE=1 SV=1	HUMAN	3	tr	X6R8A1	X6R8A1_HUMAN
315	4.36	4.36	31.21	31.21	26.01	sp|Q969H8|CS010_HUMAN	UPF0556 protein C19orf10 OS=Homo sapiens GN=C19orf10 PE=1 SV=1	HUMAN	4	sp	Q969H8	CS010_HUMAN
316	4.32	4.32	17.72	8.861	8.861	sp|P31153|METK2_HUMAN	S-adenosylmethionine synthase isoform type-2 OS=Homo sapiens GN=MAT2A PE=1 SV=1	HUMAN	3	sp	P31153	METK2_HUMAN
317	4.31	8.53	27.31	22.88	15.87	sp|Q13162|PRDX4_HUMAN	Peroxiredoxin-4 OS=Homo sapiens GN=PRDX4 PE=1 SV=1	HUMAN	5	sp	Q13162	PRDX4_HUMAN
318	4.31	4.31	17.62	14.54	14.54	sp|P00403|COX2_HUMAN	Cytochrome c oxidase subunit 2 OS=Homo sapiens GN=MT-CO2 PE=1 SV=1	HUMAN	3	sp	P00403	COX2_HUMAN
319	4.28	19.6	37.58	27.02	23.29	tr|Q5TCU8|Q5TCU8_HUMAN	Tropomyosin beta chain OS=Homo sapiens GN=TPM2 PE=1 SV=1	HUMAN	10	tr	Q5TCU8	Q5TCU8_HUMAN
320	4.23	4.23	23.22	10.11	5.243	sp|P01210|PENK_HUMAN	Proenkephalin-A OS=Homo sapiens GN=PENK PE=1 SV=1	HUMAN	2	sp	P01210	PENK_HUMAN
321	4.21	4.22	9.738	5.25	1.863	sp|P17301|ITA2_HUMAN	Integrin alpha-2 OS=Homo sapiens GN=ITGA2 PE=1 SV=1	HUMAN	2	sp	P17301	ITA2_HUMAN
322	4.2	4.2	26.03	17.81	14.61	sp|P49755|TMEDA_HUMAN	Transmembrane emp24 domain-containing protein 10 OS=Homo sapiens GN=TMED10 PE=1 SV=2	HUMAN	3	sp	P49755	TMEDA_HUMAN
323	4.19	4.38	19.82	7.057	6.306	sp|O75326|SEM7A_HUMAN	Semaphorin-7A OS=Homo sapiens GN=SEMA7A PE=1 SV=1	HUMAN	4	sp	O75326	SEM7A_HUMAN
324	4.18	4.18	7.201	5.074	4.255	tr|A6NKB8|A6NKB8_HUMAN	Aminopeptidase B OS=Homo sapiens GN=RNPEP PE=1 SV=1	HUMAN	2	tr	A6NKB8	A6NKB8_HUMAN
325	4.15	4.15	46.6	24.08	16.75	tr|Q5T8U3|Q5T8U3_HUMAN	60S ribosomal protein L7a (Fragment) OS=Homo sapiens GN=RPL7A PE=1 SV=1	HUMAN	4	tr	Q5T8U3	Q5T8U3_HUMAN
326	4.12	4.12	22.07	14.48	11.38	sp|P30084|ECHM_HUMAN	Enoyl-CoA hydratase, mitochondrial OS=Homo sapiens GN=ECHS1 PE=1 SV=4	HUMAN	2	sp	P30084	ECHM_HUMAN
327	4.11	4.18	18.17	4.037	4.037	sp|P49368|TCPG_HUMAN	T-complex protein 1 subunit gamma OS=Homo sapiens GN=CCT3 PE=1 SV=4	HUMAN	2	sp	P49368	TCPG_HUMAN
328	4.11	4.11	19.08	6.462	6.462	sp|Q13347|EIF3I_HUMAN	Eukaryotic translation initiation factor 3 subunit I OS=Homo sapiens GN=EIF3I PE=1 SV=1	HUMAN	2	sp	Q13347	EIF3I_HUMAN
329	4.09	4.09	27.27	17.05	12.5	sp|P31025|LCN1_HUMAN	Lipocalin-1 OS=Homo sapiens GN=LCN1 PE=1 SV=1	HUMAN	2	sp	P31025	LCN1_HUMAN
330	4.06	4.06	18.87	8.94	6.291	sp|O76061|STC2_HUMAN	Stanniocalcin-2 OS=Homo sapiens GN=STC2 PE=1 SV=1	HUMAN	2	sp	O76061	STC2_HUMAN
331	4.05	4.05	47	20.74	11.06	sp|P62906|RL10A_HUMAN	60S ribosomal protein L10a OS=Homo sapiens GN=RPL10A PE=1 SV=2	HUMAN	2	sp	P62906	RL10A_HUMAN
332	4.04	4.06	12.67	2.974	2.974	sp|Q13200|PSMD2_HUMAN	26S proteasome non-ATPase regulatory subunit 2 OS=Homo sapiens GN=PSMD2 PE=1 SV=3	HUMAN	2	sp	Q13200	PSMD2_HUMAN
333	4.02	4.02	8.784	4.223	4.223	sp|P27824|CALX_HUMAN	Calnexin OS=Homo sapiens GN=CANX PE=1 SV=2	HUMAN	2	sp	P27824	CALX_HUMAN
334	4.02	4.02	21.66	14.8	10.83	sp|P16152|CBR1_HUMAN	Carbonyl reductase [NADPH] 1 OS=Homo sapiens GN=CBR1 PE=1 SV=3	HUMAN	2	sp	P16152	CBR1_HUMAN
335	4.01	4.01	19.37	10.32	6.105	sp|Q96KP4|CNDP2_HUMAN	Cytosolic non-specific dipeptidase OS=Homo sapiens GN=CNDP2 PE=1 SV=2	HUMAN	3	sp	Q96KP4	CNDP2_HUMAN
336	4.01	4.01	22.03	12.71	11.02	tr|J3QT17|J3QT17_HUMAN	Sulfatase-modifying factor 2 OS=Homo sapiens GN=SUMF2 PE=1 SV=1	HUMAN	2	tr	J3QT17	J3QT17_HUMAN
337	4.01	4.01	10.39	6.461	6.461	sp|Q12907|LMAN2_HUMAN	Vesicular integral-membrane protein VIP36 OS=Homo sapiens GN=LMAN2 PE=1 SV=1	HUMAN	2	sp	Q12907	LMAN2_HUMAN
338	4	4.14	15.95	9.728	7.004	tr|E9PI68|E9PI68_HUMAN	Signal peptidase complex subunit 2 OS=Homo sapiens GN=SPCS2 PE=1 SV=1	HUMAN	2	tr	E9PI68	E9PI68_HUMAN
339	4	4.02	8.583	2.896	2.896	sp|Q9UHI8|ATS1_HUMAN	A disintegrin and metalloproteinase with thrombospondin motifs 1 OS=Homo sapiens GN=ADAMTS1 PE=1 SV=4	HUMAN	2	sp	Q9UHI8	ATS1_HUMAN
340	4	4	28.06	14.29	14.29	tr|K7EIV0|K7EIV0_HUMAN	Calpain small subunit 1 (Fragment) OS=Homo sapiens GN=CAPNS1 PE=1 SV=2	HUMAN	2	tr	K7EIV0	K7EIV0_HUMAN
341	4	4	36.3	17.04	17.04	tr|F6RFD5|F6RFD5_HUMAN	Destrin OS=Homo sapiens GN=DSTN PE=1 SV=1	HUMAN	2	tr	F6RFD5	F6RFD5_HUMAN
342	4	4	71.05	36.84	36.84	tr|E9PN17|E9PN17_HUMAN	ATP synthase subunit g, mitochondrial OS=Homo sapiens GN=ATP5L PE=1 SV=1	HUMAN	2	tr	E9PN17	E9PN17_HUMAN
343	4	4	20	20	20	tr|E7EUY5|E7EUY5_HUMAN	Single-stranded DNA-binding protein, mitochondrial (Fragment) OS=Homo sapiens GN=SSBP1 PE=1 SV=1	HUMAN	2	tr	E7EUY5	E7EUY5_HUMAN
344	3.98	3.98	8.288	3.125	3.125	sp|Q32P28|P3H1_HUMAN	Prolyl 3-hydroxylase 1 OS=Homo sapiens GN=LEPRE1 PE=1 SV=2	HUMAN	2	sp	Q32P28	P3H1_HUMAN
345	3.97	3.97	14.02	9.346	4.673	tr|A0A0A0MS41|A0A0A0MS41_HUMAN	Sideroflexin-3 OS=Homo sapiens GN=SFXN3 PE=1 SV=1	HUMAN	2	tr	A0A0A0MS41	A0A0A0MS41_HUMAN
346	3.96	3.96	9.068	3.727	3.727	tr|A2A274|A2A274_HUMAN	Aconitate hydratase, mitochondrial OS=Homo sapiens GN=ACO2 PE=1 SV=1	HUMAN	2	tr	A2A274	A2A274_HUMAN
347	3.93	3.93	23.59	15.61	12.96	tr|B1AK88|B1AK88_HUMAN	Capping protein (Actin filament) muscle Z-line, beta, isoform CRA_d OS=Homo sapiens GN=CAPZB PE=1 SV=1	HUMAN	4	tr	B1AK88	B1AK88_HUMAN
348	3.92	3.92	12.5	12.5	12.5	sp|P61353|RL27_HUMAN	60S ribosomal protein L27 OS=Homo sapiens GN=RPL27 PE=1 SV=2	HUMAN	2	sp	P61353	RL27_HUMAN
349	3.91	18.71	20.08	17.82	15.81	tr|A0A0B4J269|A0A0B4J269_HUMAN	Tubulin beta-3 chain OS=Homo sapiens GN=TUBB3 PE=4 SV=1	HUMAN	14	tr	A0A0B4J269	A0A0B4J269_HUMAN
350	3.89	3.89	35.14	18.92	14.19	sp|P61626|LYSC_HUMAN	Lysozyme C OS=Homo sapiens GN=LYZ PE=1 SV=1	HUMAN	2	sp	P61626	LYSC_HUMAN
351	3.88	3.88	40.82	21.94	21.94	tr|A2ACR1|A2ACR1_HUMAN	Proteasome subunit beta type OS=Homo sapiens GN=PSMB9 PE=1 SV=1	HUMAN	3	tr	A2ACR1	A2ACR1_HUMAN
352	3.86	3.86	15.19	4.501	3.235	tr|B9A067|B9A067_HUMAN	MICOS complex subunit MIC60 OS=Homo sapiens GN=IMMT PE=1 SV=2	HUMAN	2	tr	B9A067	B9A067_HUMAN
353	3.85	4.23	17.5	6.026	5.165	tr|E9PRY8|E9PRY8_HUMAN	Elongation factor 1-delta OS=Homo sapiens GN=EEF1D PE=1 SV=1	HUMAN	2	tr	E9PRY8	E9PRY8_HUMAN
354	3.85	3.96	8.981	2.508	0.6068	sp|Q13813|SPTN1_HUMAN	Spectrin alpha chain, non-erythrocytic 1 OS=Homo sapiens GN=SPTAN1 PE=1 SV=3	HUMAN	2	sp	Q13813	SPTN1_HUMAN
355	3.83	10.03	27.52	18.12	14.77	sp|P12236|ADT3_HUMAN	ADP/ATP translocase 3 OS=Homo sapiens GN=SLC25A6 PE=1 SV=4	HUMAN	5	sp	P12236	ADT3_HUMAN
356	3.79	3.79	24.81	6.948	4.715	sp|P39023|RL3_HUMAN	60S ribosomal protein L3 OS=Homo sapiens GN=RPL3 PE=1 SV=2	HUMAN	2	sp	P39023	RL3_HUMAN
357	3.74	3.78	13.59	6.522	4.891	tr|F5H365|F5H365_HUMAN	Protein transport protein Sec23A OS=Homo sapiens GN=SEC23A PE=1 SV=1	HUMAN	3	tr	F5H365	F5H365_HUMAN
358	3.74	3.74	24.77	19.37	10.81	sp|Q9BS40|LXN_HUMAN	Latexin OS=Homo sapiens GN=LXN PE=1 SV=2	HUMAN	2	sp	Q9BS40	LXN_HUMAN
359	3.73	3.91	11.62	4.841	3.043	sp|P26639|SYTC_HUMAN	Threonine--tRNA ligase, cytoplasmic OS=Homo sapiens GN=TARS PE=1 SV=3	HUMAN	2	sp	P26639	SYTC_HUMAN
360	3.73	3.74	9.346	9.346	7.165	sp|Q13630|FCL_HUMAN	GDP-L-fucose synthase OS=Homo sapiens GN=TSTA3 PE=1 SV=1	HUMAN	2	sp	Q13630	FCL_HUMAN
361	3.73	3.73	20.35	8.772	2.982	sp|Q14195|DPYL3_HUMAN	Dihydropyrimidinase-related protein 3 OS=Homo sapiens GN=DPYSL3 PE=1 SV=1	HUMAN	2	sp	Q14195	DPYL3_HUMAN
362	3.73	3.73	24.39	16.59	8.78	tr|E9PKZ0|E9PKZ0_HUMAN	60S ribosomal protein L8 (Fragment) OS=Homo sapiens GN=RPL8 PE=1 SV=1	HUMAN	2	tr	E9PKZ0	E9PKZ0_HUMAN
363	3.71	3.71	14.57	7.064	4.857	tr|B4DJV2|B4DJV2_HUMAN	Citrate synthase OS=Homo sapiens GN=CS PE=1 SV=1	HUMAN	2	tr	B4DJV2	B4DJV2_HUMAN
364	3.7	3.7	64.58	26.04	26.04	sp|P60468|SC61B_HUMAN	Protein transport protein Sec61 subunit beta OS=Homo sapiens GN=SEC61B PE=1 SV=2	HUMAN	2	sp	P60468	SC61B_HUMAN
365	3.7	3.7	16.09	10.63	10.63	sp|P40121|CAPG_HUMAN	Macrophage-capping protein OS=Homo sapiens GN=CAPG PE=1 SV=2	HUMAN	3	sp	P40121	CAPG_HUMAN
366	3.68	3.68	16.58	10.88	10.88	tr|Q5TD07|Q5TD07_HUMAN	Ribosyldihydronicotinamide dehydrogenase [quinone] OS=Homo sapiens GN=NQO2 PE=1 SV=1	HUMAN	2	tr	Q5TD07	Q5TD07_HUMAN
367	3.66	3.66	37.26	11.03	11.03	tr|F8W031|F8W031_HUMAN	Uncharacterized protein (Fragment) OS=Homo sapiens PE=1 SV=1	HUMAN	2	tr	F8W031	F8W031_HUMAN
368	3.65	3.65	25.99	18.08	11.86	tr|J3QRS3|J3QRS3_HUMAN	Myosin regulatory light chain 12A OS=Homo sapiens GN=MYL12A PE=1 SV=1	HUMAN	2	tr	J3QRS3	J3QRS3_HUMAN
369	3.65	3.65	4.202	2.416	2.416	sp|P10253|LYAG_HUMAN	Lysosomal alpha-glucosidase OS=Homo sapiens GN=GAA PE=1 SV=4	HUMAN	2	sp	P10253	LYAG_HUMAN
370	3.64	3.64	20.42	4.648	2.676	sp|P19338|NUCL_HUMAN	Nucleolin OS=Homo sapiens GN=NCL PE=1 SV=3	HUMAN	2	sp	P19338	NUCL_HUMAN
371	3.63	3.65	16.88	12.66	6.494	sp|Q12841|FSTL1_HUMAN	Follistatin-related protein 1 OS=Homo sapiens GN=FSTL1 PE=1 SV=1	HUMAN	3	sp	Q12841	FSTL1_HUMAN
372	3.62	3.62	14.85	6.186	4.948	sp|P51648|AL3A2_HUMAN	Fatty aldehyde dehydrogenase OS=Homo sapiens GN=ALDH3A2 PE=1 SV=1	HUMAN	2	sp	P51648	AL3A2_HUMAN
373	3.6	23.13	32.01	22.61	14.01	sp|P12035|K2C3_HUMAN	Keratin, type II cytoskeletal 3 OS=Homo sapiens GN=KRT3 PE=1 SV=3	HUMAN	15	sp	P12035	K2C3_HUMAN
374	3.59	3.59	35.49	13.31	6.485	sp|P15880|RS2_HUMAN	40S ribosomal protein S2 OS=Homo sapiens GN=RPS2 PE=1 SV=2	HUMAN	2	sp	P15880	RS2_HUMAN
375	3.55	4.05	8.683	2.195	1.718	sp|P06756|ITAV_HUMAN	Integrin alpha-V OS=Homo sapiens GN=ITGAV PE=1 SV=2	HUMAN	3	sp	P06756	ITAV_HUMAN
376	3.55	3.55	13.48	3.249	1.706	sp|P08603|CFAH_HUMAN	Complement factor H OS=Homo sapiens GN=CFH PE=1 SV=4	HUMAN	2	sp	P08603	CFAH_HUMAN
377	3.53	3.53	12.42	9.873	6.369	sp|Q9BRF8|CPPED_HUMAN	Serine/threonine-protein phosphatase CPPED1 OS=Homo sapiens GN=CPPED1 PE=1 SV=3	HUMAN	2	sp	Q9BRF8	CPPED_HUMAN
378	3.51	3.51	15.64	6.84	6.84	tr|F8W6I7|F8W6I7_HUMAN	Heterogeneous nuclear ribonucleoprotein A1 OS=Homo sapiens GN=HNRNPA1 PE=1 SV=2	HUMAN	2	tr	F8W6I7	F8W6I7_HUMAN
379	3.5	3.5	10.16	6.098	5.285	sp|Q9UHL4|DPP2_HUMAN	Dipeptidyl peptidase 2 OS=Homo sapiens GN=DPP7 PE=1 SV=3	HUMAN	2	sp	Q9UHL4	DPP2_HUMAN
380	3.49	3.49	26.57	9.851	7.761	sp|Q16698|DECR_HUMAN	2,4-dienoyl-CoA reductase, mitochondrial OS=Homo sapiens GN=DECR1 PE=1 SV=1	HUMAN	2	sp	Q16698	DECR_HUMAN
381	3.48	3.48	31.65	15.19	15.19	sp|P10124|SRGN_HUMAN	Serglycin OS=Homo sapiens GN=SRGN PE=1 SV=3	HUMAN	4	sp	P10124	SRGN_HUMAN
382	3.48	3.48	33.66	21.78	21.78	tr|C9JFR7|C9JFR7_HUMAN	Cytochrome c (Fragment) OS=Homo sapiens GN=CYCS PE=1 SV=1	HUMAN	2	tr	C9JFR7	C9JFR7_HUMAN
383	3.48	3.48	19.15	9.043	9.043	tr|B4DQI4|B4DQI4_HUMAN	Alpha/beta hydrolase domain-containing protein 14B OS=Homo sapiens GN=ABHD14B PE=1 SV=1	HUMAN	2	tr	B4DQI4	B4DQI4_HUMAN
384	3.46	3.54	11.76	2.614	1.634	sp|P53621|COPA_HUMAN	Coatomer subunit alpha OS=Homo sapiens GN=COPA PE=1 SV=2	HUMAN	2	sp	P53621	COPA_HUMAN
385	3.46	3.46	29.45	19.18	19.18	sp|P01034|CYTC_HUMAN	Cystatin-C OS=Homo sapiens GN=CST3 PE=1 SV=1	HUMAN	2	sp	P01034	CYTC_HUMAN
386	3.44	4.34	13.17	11.29	9.946	sp|O15143|ARC1B_HUMAN	Actin-related protein 2/3 complex subunit 1B OS=Homo sapiens GN=ARPC1B PE=1 SV=3	HUMAN	3	sp	O15143	ARC1B_HUMAN
387	3.43	3.43	7.261	7.261	7.261	sp|Q9UBR2|CATZ_HUMAN	Cathepsin Z OS=Homo sapiens GN=CTSZ PE=1 SV=1	HUMAN	2	sp	Q9UBR2	CATZ_HUMAN
388	3.4	3.4	8.299	2.857	2.857	tr|B4DLR2|B4DLR2_HUMAN	Prolyl endopeptidase FAP OS=Homo sapiens GN=FAP PE=1 SV=1	HUMAN	2	tr	B4DLR2	B4DLR2_HUMAN
389	3.37	3.37	21.31	21.31	21.31	tr|H0YL18|H0YL18_HUMAN	Beta-2-microglobulin OS=Homo sapiens GN=B2M PE=1 SV=1	HUMAN	4	tr	H0YL18	H0YL18_HUMAN
391	3.32	3.38	16.4	12.35	7.49	sp|P49189|AL9A1_HUMAN	4-trimethylaminobutyraldehyde dehydrogenase OS=Homo sapiens GN=ALDH9A1 PE=1 SV=3	HUMAN	3	sp	P49189	AL9A1_HUMAN
392	3.31	3.31	22.81	19.3	19.3	tr|J3QQT2|J3QQT2_HUMAN	60S ribosomal protein L17 (Fragment) OS=Homo sapiens GN=RPL17 PE=1 SV=1	HUMAN	3	tr	J3QQT2	J3QQT2_HUMAN
393	3.3	3.32	17.84	2.241	2.139	sp|Q09666|AHNK_HUMAN	Neuroblast differentiation-associated protein AHNAK OS=Homo sapiens GN=AHNAK PE=1 SV=2	HUMAN	3	sp	Q09666	AHNK_HUMAN
394	3.3	3.3	25.75	20.96	16.17	tr|E9PCT5|E9PCT5_HUMAN	Caveolin OS=Homo sapiens GN=CAV1 PE=1 SV=1	HUMAN	3	tr	E9PCT5	E9PCT5_HUMAN
395	3.27	3.27	13.61	3.369	3.369	sp|P16070|CD44_HUMAN	CD44 antigen OS=Homo sapiens GN=CD44 PE=1 SV=3	HUMAN	3	sp	P16070	CD44_HUMAN
396	3.25	3.25	44.83	20	13.79	sp|P39019|RS19_HUMAN	40S ribosomal protein S19 OS=Homo sapiens GN=RPS19 PE=1 SV=2	HUMAN	3	sp	P39019	RS19_HUMAN
397	3.25	3.25	25.39	11.4	7.772	tr|J3QR09|J3QR09_HUMAN	Ribosomal protein L19 OS=Homo sapiens GN=RPL19 PE=1 SV=1	HUMAN	2	tr	J3QR09	J3QR09_HUMAN
398	3.25	3.25	20.47	8.372	8.372	sp|P50914|RL14_HUMAN	60S ribosomal protein L14 OS=Homo sapiens GN=RPL14 PE=1 SV=4	HUMAN	2	sp	P50914	RL14_HUMAN
400	3.24	3.25	12.11	8.232	6.053	sp|P17174|AATC_HUMAN	Aspartate aminotransferase, cytoplasmic OS=Homo sapiens GN=GOT1 PE=1 SV=3	HUMAN	2	sp	P17174	AATC_HUMAN
401	3.22	3.33	8.564	4.144	3.177	tr|G3XAP6|G3XAP6_HUMAN	Cartilage oligomeric matrix protein OS=Homo sapiens GN=COMP PE=1 SV=1	HUMAN	2	tr	G3XAP6	G3XAP6_HUMAN
402	3.19	3.21	25.14	11.73	11.73	tr|F5H7Y6|F5H7Y6_HUMAN	Ras-related protein Rap-1b OS=Homo sapiens GN=RAP1B PE=1 SV=1	HUMAN	2	tr	F5H7Y6	F5H7Y6_HUMAN
403	3.19	3.19	22.3	4.857	4.857	sp|P22695|QCR2_HUMAN	Cytochrome b-c1 complex subunit 2, mitochondrial OS=Homo sapiens GN=UQCRC2 PE=1 SV=3	HUMAN	2	sp	P22695	QCR2_HUMAN
404	3.18	3.18	18.35	7.034	7.034	sp|P62140|PP1B_HUMAN	Serine/threonine-protein phosphatase PP1-beta catalytic subunit OS=Homo sapiens GN=PPP1CB PE=1 SV=3	HUMAN	2	sp	P62140	PP1B_HUMAN
405	3.17	3.17	14.34	8.392	8.392	sp|P47755|CAZA2_HUMAN	F-actin-capping protein subunit alpha-2 OS=Homo sapiens GN=CAPZA2 PE=1 SV=3	HUMAN	2	sp	P47755	CAZA2_HUMAN
406	3.16	3.16	32.51	16.26	8.867	sp|P40429|RL13A_HUMAN	60S ribosomal protein L13a OS=Homo sapiens GN=RPL13A PE=1 SV=2	HUMAN	2	sp	P40429	RL13A_HUMAN
407	3.15	3.15	31.93	15.97	15.97	tr|E5RJD8|E5RJD8_HUMAN	Tubulin-specific chaperone A OS=Homo sapiens GN=TBCA PE=1 SV=1	HUMAN	2	tr	E5RJD8	E5RJD8_HUMAN
408	3.14	3.14	12.64	6.24	4.598	sp|P12956|XRCC6_HUMAN	X-ray repair cross-complementing protein 6 OS=Homo sapiens GN=XRCC6 PE=1 SV=2	HUMAN	2	sp	P12956	XRCC6_HUMAN
409	3.14	3.14	15.52	7.328	7.328	tr|C9JRZ6|C9JRZ6_HUMAN	MICOS complex subunit MIC19 OS=Homo sapiens GN=CHCHD3 PE=1 SV=1	HUMAN	2	tr	C9JRZ6	C9JRZ6_HUMAN
410	3.1	3.1	12.88	10.54	4.684	sp|P36578|RL4_HUMAN	60S ribosomal protein L4 OS=Homo sapiens GN=RPL4 PE=1 SV=5	HUMAN	2	sp	P36578	RL4_HUMAN
411	3.09	3.09	18.5	13.87	13.87	sp|P51571|SSRD_HUMAN	Translocon-associated protein subunit delta OS=Homo sapiens GN=SSR4 PE=1 SV=1	HUMAN	2	sp	P51571	SSRD_HUMAN
412	3.08	3.08	26.67	16.19	5.714	tr|Q5T9B7|Q5T9B7_HUMAN	Adenylate kinase isoenzyme 1 OS=Homo sapiens GN=AK1 PE=1 SV=1	HUMAN	2	tr	Q5T9B7	Q5T9B7_HUMAN
413	3.08	3.08	8.736	3.903	3.532	sp|P10155|RO60_HUMAN	60 kDa SS-A/Ro ribonucleoprotein OS=Homo sapiens GN=TROVE2 PE=1 SV=2	HUMAN	2	sp	P10155	RO60_HUMAN
414	3.07	3.07	11.36	5.071	3.651	sp|P12955|PEPD_HUMAN	Xaa-Pro dipeptidase OS=Homo sapiens GN=PEPD PE=1 SV=3	HUMAN	2	sp	P12955	PEPD_HUMAN
415	3.05	3.05	12.63	3.053	2.105	sp|Q76M96|CCD80_HUMAN	Coiled-coil domain-containing protein 80 OS=Homo sapiens GN=CCDC80 PE=1 SV=1	HUMAN	2	sp	Q76M96	CCD80_HUMAN
416	3.04	3.04	42.86	26.53	19.39	sp|Q99584|S10AD_HUMAN	Protein S100-A13 OS=Homo sapiens GN=S100A13 PE=1 SV=1	HUMAN	2	sp	Q99584	S10AD_HUMAN
417	3.04	3.04	39.26	24.44	24.44	sp|P09382|LEG1_HUMAN	Galectin-1 OS=Homo sapiens GN=LGALS1 PE=1 SV=2	HUMAN	6	sp	P09382	LEG1_HUMAN
418	3.02	3.05	8.473	3.356	3.356	sp|Q9NQC3|RTN4_HUMAN	Reticulon-4 OS=Homo sapiens GN=RTN4 PE=1 SV=2	HUMAN	2	sp	Q9NQC3	RTN4_HUMAN
419	3.01	3.57	20.24	9.286	5.714	tr|V9HW75|V9HW75_HUMAN	Epididymis secretory protein Li 109 OS=Homo sapiens GN=HEL-S-109 PE=1 SV=1	HUMAN	2	tr	V9HW75	V9HW75_HUMAN
420	3	3	10	3.704	3.704	tr|A0A087WYY1|A0A087WYY1_HUMAN	Carboxypeptidase Q OS=Homo sapiens GN=CPQ PE=1 SV=1	HUMAN	2	tr	A0A087WYY1	A0A087WYY1_HUMAN
421	3	3	6.217	1.455	1.455	sp|P51178|PLCD1_HUMAN	1-phosphatidylinositol 4,5-bisphosphate phosphodiesterase delta-1 OS=Homo sapiens GN=PLCD1 PE=1 SV=2	HUMAN	2	sp	P51178	PLCD1_HUMAN
422	2.98	3.13	10.66	6.183	4.904	sp|P03956|MMP1_HUMAN	Interstitial collagenase OS=Homo sapiens GN=MMP1 PE=1 SV=3	HUMAN	2	sp	P03956	MMP1_HUMAN
423	2.98	2.98	28.69	21.31	21.31	tr|J3KT29|J3KT29_HUMAN	60S ribosomal protein L23 OS=Homo sapiens GN=RPL23 PE=1 SV=1	HUMAN	2	tr	J3KT29	J3KT29_HUMAN
424	2.95	2.95	13.76	6.022	4.516	sp|O60687|SRPX2_HUMAN	Sushi repeat-containing protein SRPX2 OS=Homo sapiens GN=SRPX2 PE=1 SV=1	HUMAN	2	sp	O60687	SRPX2_HUMAN
425	2.95	2.95	21.7	12.74	12.74	sp|P61019|RAB2A_HUMAN	Ras-related protein Rab-2A OS=Homo sapiens GN=RAB2A PE=1 SV=1	HUMAN	2	sp	P61019	RAB2A_HUMAN
426	2.94	2.94	13.16	13.16	13.16	sp|O14684|PTGES_HUMAN	Prostaglandin E synthase OS=Homo sapiens GN=PTGES PE=1 SV=2	HUMAN	2	sp	O14684	PTGES_HUMAN
427	2.93	2.93	12.62	7.243	5.607	sp|Q13838|DX39B_HUMAN	Spliceosome RNA helicase DDX39B OS=Homo sapiens GN=DDX39B PE=1 SV=1	HUMAN	2	sp	Q13838	DX39B_HUMAN
428	2.89	21.98	37.98	32.13	30.79	sp|P68371|TBB4B_HUMAN	Tubulin beta-4B chain OS=Homo sapiens GN=TUBB4B PE=1 SV=1	HUMAN	14	sp	P68371	TBB4B_HUMAN
430	2.87	3.58	10.78	4.957	4.957	sp|P78539|SRPX_HUMAN	Sushi repeat-containing protein SRPX OS=Homo sapiens GN=SRPX PE=1 SV=1	HUMAN	3	sp	P78539	SRPX_HUMAN
431	2.86	2.86	20.7	8.984	8.984	sp|P24539|AT5F1_HUMAN	ATP synthase F(0) complex subunit B1, mitochondrial OS=Homo sapiens GN=ATP5F1 PE=1 SV=2	HUMAN	2	sp	P24539	AT5F1_HUMAN
432	2.86	2.86	16.3	9.251	9.251	sp|Q9UIJ7|KAD3_HUMAN	GTP:AMP phosphotransferase AK3, mitochondrial OS=Homo sapiens GN=AK3 PE=1 SV=4	HUMAN	2	sp	Q9UIJ7	KAD3_HUMAN
433	2.84	2.84	16.96	10.94	6.022	sp|P04844|RPN2_HUMAN	Dolichyl-diphosphooligosaccharide--protein glycosyltransferase subunit 2 OS=Homo sapiens GN=RPN2 PE=1 SV=3	HUMAN	2	sp	P04844	RPN2_HUMAN
434	2.83	2.83	27.06	18.24	10.59	tr|H0YKD8|H0YKD8_HUMAN	60S ribosomal protein L28 OS=Homo sapiens GN=RPL28 PE=1 SV=1	HUMAN	2	tr	H0YKD8	H0YKD8_HUMAN
435	2.82	2.82	28.32	15.04	9.735	sp|P07858|CATB_HUMAN	Cathepsin B OS=Homo sapiens GN=CTSB PE=1 SV=3	HUMAN	4	sp	P07858	CATB_HUMAN
438	2.79	3.15	12.92	5.618	5.618	sp|Q15365|PCBP1_HUMAN	Poly(rC)-binding protein 1 OS=Homo sapiens GN=PCBP1 PE=1 SV=2	HUMAN	2	sp	Q15365	PCBP1_HUMAN
439	2.78	2.78	16.14	9.123	9.123	sp|O95865|DDAH2_HUMAN	N(G),N(G)-dimethylarginine dimethylaminohydrolase 2 OS=Homo sapiens GN=DDAH2 PE=1 SV=1	HUMAN	2	sp	O95865	DDAH2_HUMAN
440	2.77	2.77	20.27	5.236	3.547	sp|P31939|PUR9_HUMAN	Bifunctional purine biosynthesis protein PURH OS=Homo sapiens GN=ATIC PE=1 SV=3	HUMAN	2	sp	P31939	PUR9_HUMAN
441	2.76	9.99	23.58	18.87	18.87	sp|P45877|PPIC_HUMAN	Peptidyl-prolyl cis-trans isomerase C OS=Homo sapiens GN=PPIC PE=1 SV=1	HUMAN	7	sp	P45877	PPIC_HUMAN
442	2.74	2.74	3.608	2.309	2.309	sp|Q08188|TGM3_HUMAN	Protein-glutamine gamma-glutamyltransferase E OS=Homo sapiens GN=TGM3 PE=1 SV=4	HUMAN	2	sp	Q08188	TGM3_HUMAN
443	2.73	2.74	9.897	2.112	0.8449	sp|P46940|IQGA1_HUMAN	Ras GTPase-activating-like protein IQGAP1 OS=Homo sapiens GN=IQGAP1 PE=1 SV=1	HUMAN	2	sp	P46940	IQGA1_HUMAN
444	2.72	2.72	15.89	6.992	5.085	sp|Q13228|SBP1_HUMAN	Selenium-binding protein 1 OS=Homo sapiens GN=SELENBP1 PE=1 SV=2	HUMAN	2	sp	Q13228	SBP1_HUMAN
446	2.68	2.68	23.19	23.19	23.19	tr|F5H0R4|F5H0R4_HUMAN	Nicotinamide N-methyltransferase OS=Homo sapiens GN=NNMT PE=1 SV=1	HUMAN	2	tr	F5H0R4	F5H0R4_HUMAN
447	2.65	2.65	18.52	6.584	6.584	sp|Q96CG8|CTHR1_HUMAN	Collagen triple helix repeat-containing protein 1 OS=Homo sapiens GN=CTHRC1 PE=1 SV=1	HUMAN	2	sp	Q96CG8	CTHR1_HUMAN
449	2.61	178.91	51.15	43.91	39.82	tr|E7ENL6|E7ENL6_HUMAN	Collagen alpha-3(VI) chain OS=Homo sapiens GN=COL6A3 PE=1 SV=2	HUMAN	112	tr	E7ENL6	E7ENL6_HUMAN
450	2.6	2.6	11.85	3.872	3.872	sp|Q08629|TICN1_HUMAN	Testican-1 OS=Homo sapiens GN=SPOCK1 PE=1 SV=1	HUMAN	2	sp	Q08629	TICN1_HUMAN
451	2.58	2.58	13.36	5.049	3.257	tr|J3KTA4|J3KTA4_HUMAN	Probable ATP-dependent RNA helicase DDX5 OS=Homo sapiens GN=DDX5 PE=1 SV=1	HUMAN	2	tr	J3KTA4	J3KTA4_HUMAN
452	2.57	10.97	46.53	39.18	16.33	sp|P27348|1433T_HUMAN	14-3-3 protein theta OS=Homo sapiens GN=YWHAQ PE=1 SV=1	HUMAN	5	sp	P27348	1433T_HUMAN
453	2.56	2.57	9.91	3.203	2.202	sp|Q9Y4L1|HYOU1_HUMAN	Hypoxia up-regulated protein 1 OS=Homo sapiens GN=HYOU1 PE=1 SV=1	HUMAN	2	sp	Q9Y4L1	HYOU1_HUMAN
455	2.54	2.54	18.72	8.462	4.615	sp|P08559|ODPA_HUMAN	Pyruvate dehydrogenase E1 component subunit alpha, somatic form, mitochondrial OS=Homo sapiens GN=PDHA1 PE=1 SV=3	HUMAN	2	sp	P08559	ODPA_HUMAN
456	2.54	2.54	29.5	25.67	9.579	sp|P30040|ERP29_HUMAN	Endoplasmic reticulum resident protein 29 OS=Homo sapiens GN=ERP29 PE=1 SV=4	HUMAN	2	sp	P30040	ERP29_HUMAN
458	2.53	2.57	14.42	3.042	3.042	tr|G3V1D3|G3V1D3_HUMAN	Dipeptidyl peptidase 3 OS=Homo sapiens GN=DPP3 PE=1 SV=1	HUMAN	2	tr	G3V1D3	G3V1D3_HUMAN
461	2.51	2.51	25	25	25	sp|Q9UBI6|GBG12_HUMAN	Guanine nucleotide-binding protein G(I)/G(S)/G(O) subunit gamma-12 OS=Homo sapiens GN=GNG12 PE=1 SV=3	HUMAN	2	sp	Q9UBI6	GBG12_HUMAN
463	2.47	2.48	13.38	3.535	1.431	sp|Q9UKX5|ITA11_HUMAN	Integrin alpha-11 OS=Homo sapiens GN=ITGA11 PE=1 SV=2	HUMAN	2	sp	Q9UKX5	ITA11_HUMAN
465	2.46	37.12	50.53	28.01	21.63	sp|P04259|K2C6B_HUMAN	Keratin, type II cytoskeletal 6B OS=Homo sapiens GN=KRT6B PE=1 SV=5	HUMAN	23	sp	P04259	K2C6B_HUMAN
468	2.45	2.49	16.94	8.471	5.341	sp|Q99832|TCPH_HUMAN	T-complex protein 1 subunit eta OS=Homo sapiens GN=CCT7 PE=1 SV=2	HUMAN	3	sp	Q99832	TCPH_HUMAN
470	2.45	2.45	7.014	7.014	5.21	tr|Q5SZU1|Q5SZU1_HUMAN	D-3-phosphoglycerate dehydrogenase OS=Homo sapiens GN=PHGDH PE=1 SV=1	HUMAN	2	tr	Q5SZU1	Q5SZU1_HUMAN
471	2.44	5.22	24.87	12.18	7.36	sp|P61160|ARP2_HUMAN	Actin-related protein 2 OS=Homo sapiens GN=ACTR2 PE=1 SV=1	HUMAN	4	sp	P61160	ARP2_HUMAN
472	2.43	2.43	18.01	10.87	7.764	sp|Q9H9B4|SFXN1_HUMAN	Sideroflexin-1 OS=Homo sapiens GN=SFXN1 PE=1 SV=4	HUMAN	2	sp	Q9H9B4	SFXN1_HUMAN
473	2.43	2.43	15.89	7.616	7.616	sp|P19623|SPEE_HUMAN	Spermidine synthase OS=Homo sapiens GN=SRM PE=1 SV=1	HUMAN	2	sp	P19623	SPEE_HUMAN
474	2.42	2.42	15.98	5.621	5.621	tr|E5RHW4|E5RHW4_HUMAN	Erlin-2 (Fragment) OS=Homo sapiens GN=ERLIN2 PE=1 SV=1	HUMAN	2	tr	E5RHW4	E5RHW4_HUMAN
476	2.38	2.38	41.44	14.41	14.41	tr|H3BV69|H3BV69_HUMAN	Cytochrome c oxidase subunit 5A, mitochondrial OS=Homo sapiens GN=COX5A PE=1 SV=1	HUMAN	2	tr	H3BV69	H3BV69_HUMAN
478	2.38	2.38	17.08	6.667	4.167	sp|P24592|IBP6_HUMAN	Insulin-like growth factor-binding protein 6 OS=Homo sapiens GN=IGFBP6 PE=1 SV=1	HUMAN	2	sp	P24592	IBP6_HUMAN
480	2.36	2.36	13.24	13.24	13.24	sp|Q9NRR1|CYTL1_HUMAN	Cytokine-like protein 1 OS=Homo sapiens GN=CYTL1 PE=1 SV=1	HUMAN	2	sp	Q9NRR1	CYTL1_HUMAN
481	2.32	2.38	15.59	8.529	7.059	sp|Q9HAV0|GBB4_HUMAN	Guanine nucleotide-binding protein subunit beta-4 OS=Homo sapiens GN=GNB4 PE=1 SV=3	HUMAN	2	sp	Q9HAV0	GBB4_HUMAN
482	2.31	2.31	8.194	2.731	2.731	tr|F1T0B3|F1T0B3_HUMAN	ATP-dependent RNA helicase DDX1 OS=Homo sapiens GN=DDX1 PE=1 SV=1	HUMAN	2	tr	F1T0B3	F1T0B3_HUMAN
483	2.31	2.31	10.31	8.072	5.83	sp|P02743|SAMP_HUMAN	Serum amyloid P-component OS=Homo sapiens GN=APCS PE=1 SV=2	HUMAN	2	sp	P02743	SAMP_HUMAN
487	2.27	2.27	29.21	17.42	13.48	sp|O15145|ARPC3_HUMAN	Actin-related protein 2/3 complex subunit 3 OS=Homo sapiens GN=ARPC3 PE=1 SV=3	HUMAN	2	sp	O15145	ARPC3_HUMAN
488	2.25	2.25	20.49	9.028	6.597	sp|Q02878|RL6_HUMAN	60S ribosomal protein L6 OS=Homo sapiens GN=RPL6 PE=1 SV=3	HUMAN	2	sp	Q02878	RL6_HUMAN
492	2.23	2.23	16.28	8.527	5.426	sp|Q08431|MFGM_HUMAN	Lactadherin OS=Homo sapiens GN=MFGE8 PE=1 SV=2	HUMAN	2	sp	Q08431	MFGM_HUMAN
493	2.21	2.21	14.02	10.28	10.28	sp|P30044|PRDX5_HUMAN	Peroxiredoxin-5, mitochondrial OS=Homo sapiens GN=PRDX5 PE=1 SV=4	HUMAN	2	sp	P30044	PRDX5_HUMAN
495	2.19	2.19	2.551	0.9619	0.9619	sp|Q5D862|FILA2_HUMAN	Filaggrin-2 OS=Homo sapiens GN=FLG2 PE=1 SV=1	HUMAN	2	sp	Q5D862	FILA2_HUMAN
499	2.15	2.16	3.783	0.3061	0.09956	tr|A0A0A0MRA3|A0A0A0MRA3_HUMAN	Titin OS=Homo sapiens GN=TTN PE=1 SV=1	HUMAN	3	tr	A0A0A0MRA3	A0A0A0MRA3_HUMAN
503	2.13	2.13	13.56	5.697	4.322	sp|P12081|SYHC_HUMAN	Histidine--tRNA ligase, cytoplasmic OS=Homo sapiens GN=HARS PE=1 SV=2	HUMAN	2	sp	P12081	SYHC_HUMAN
504	2.12	2.12	15.66	11.62	11.62	sp|Q9NR31|SAR1A_HUMAN	GTP-binding protein SAR1a OS=Homo sapiens GN=SAR1A PE=1 SV=1	HUMAN	2	sp	Q9NR31	SAR1A_HUMAN
507	2.07	2.13	7.608	1.268	0.803	tr|A0A087WUZ3|A0A087WUZ3_HUMAN	Spectrin beta chain, non-erythrocytic 1 OS=Homo sapiens GN=SPTBN1 PE=1 SV=1	HUMAN	2	tr	A0A087WUZ3	A0A087WUZ3_HUMAN
508	2.07	2.07	11.79	7.692	4.615	sp|O00264|PGRC1_HUMAN	Membrane-associated progesterone receptor component 1 OS=Homo sapiens GN=PGRMC1 PE=1 SV=3	HUMAN	2	sp	O00264	PGRC1_HUMAN
517	2.01	2.79	12.5	7.212	3.846	sp|Q9HDC9|APMAP_HUMAN	Adipocyte plasma membrane-associated protein OS=Homo sapiens GN=APMAP PE=1 SV=2	HUMAN	2	sp	Q9HDC9	APMAP_HUMAN
524	2	8.56	55.26	40.79	34.21	sp|P15531|NDKA_HUMAN	Nucleoside diphosphate kinase A OS=Homo sapiens GN=NME1 PE=1 SV=1	HUMAN	6	sp	P15531	NDKA_HUMAN
539	2	2	15.38	9.05	9.05	tr|H0YDL9|H0YDL9_HUMAN	Tetraspanin (Fragment) OS=Homo sapiens GN=CD81 PE=1 SV=1	HUMAN	2	tr	H0YDL9	H0YDL9_HUMAN
562	1.96	2	8.046	8.046	8.046	tr|C9JA28|C9JA28_HUMAN	Translocon-associated protein subunit gamma OS=Homo sapiens GN=SSR3 PE=1 SV=1	HUMAN	2	tr	C9JA28	C9JA28_HUMAN
563	1.96	1.96	12.96	5.352	5.352	sp|O95837|GNA14_HUMAN	Guanine nucleotide-binding protein subunit alpha-14 OS=Homo sapiens GN=GNA14 PE=2 SV=1	HUMAN	2	sp	O95837	GNA14_HUMAN
575	1.89	10.98	48	17.82	16.73	tr|B7Z596|B7Z596_HUMAN	Tropomyosin alpha-1 chain OS=Homo sapiens GN=TPM1 PE=1 SV=1	HUMAN	6	tr	B7Z596	B7Z596_HUMAN
577	1.88	1.88	9.948	9.948	5.759	sp|P60953|CDC42_HUMAN	Cell division control protein 42 homolog OS=Homo sapiens GN=CDC42 PE=1 SV=2	HUMAN	2	sp	P60953	CDC42_HUMAN
578	1.87	1.88	23.38	15.05	7.87	sp|Q8NBS9|TXND5_HUMAN	Thioredoxin domain-containing protein 5 OS=Homo sapiens GN=TXNDC5 PE=1 SV=2	HUMAN	3	sp	Q8NBS9	TXND5_HUMAN
585	1.82	4.02	14.93	7.734	3.237	sp|P07686|HEXB_HUMAN	Beta-hexosaminidase subunit beta OS=Homo sapiens GN=HEXB PE=1 SV=3	HUMAN	2	sp	P07686	HEXB_HUMAN
587	1.8	4.12	37.44	29.06	18.23	sp|P51153|RAB13_HUMAN	Ras-related protein Rab-13 OS=Homo sapiens GN=RAB13 PE=1 SV=1	HUMAN	3	sp	P51153	RAB13_HUMAN
592	1.78	3.6	21.69	12.45	8.032	sp|P62753|RS6_HUMAN	40S ribosomal protein S6 OS=Homo sapiens GN=RPS6 PE=1 SV=1	HUMAN	2	sp	P62753	RS6_HUMAN
598	1.74	1.74	22.28	17.39	9.239	sp|Q04760|LGUL_HUMAN	Lactoylglutathione lyase OS=Homo sapiens GN=GLO1 PE=1 SV=4	HUMAN	2	sp	Q04760	LGUL_HUMAN
600	1.73	5.85	33.56	16.33	12.3	sp|P31150|GDIA_HUMAN	Rab GDP dissociation inhibitor alpha OS=Homo sapiens GN=GDI1 PE=1 SV=2	HUMAN	5	sp	P31150	GDIA_HUMAN
605	1.7	1.7	28.46	11.86	7.51	tr|J3KTL2|J3KTL2_HUMAN	Serine/arginine-rich-splicing factor 1 OS=Homo sapiens GN=SRSF1 PE=1 SV=1	HUMAN	2	tr	J3KTL2	J3KTL2_HUMAN
610	1.66	3.44	25.91	4.145	4.145	sp|Q6NVY1|HIBCH_HUMAN	3-hydroxyisobutyryl-CoA hydrolase, mitochondrial OS=Homo sapiens GN=HIBCH PE=1 SV=2	HUMAN	2	sp	Q6NVY1	HIBCH_HUMAN
615	1.61	1.75	22.29	16.57	13.71	tr|K4JQN1|K4JQN1_HUMAN	Apoptosis regulator BAX OS=Homo sapiens GN=BAX PE=1 SV=1	HUMAN	2	tr	K4JQN1	K4JQN1_HUMAN
620	1.6	1.6	11.92	9.272	9.272	sp|P42126|ECI1_HUMAN	Enoyl-CoA delta isomerase 1, mitochondrial OS=Homo sapiens GN=ECI1 PE=1 SV=1	HUMAN	2	sp	P42126	ECI1_HUMAN
622	1.5	1.62	9.887	2.003	2.003	sp|P18084|ITB5_HUMAN	Integrin beta-5 OS=Homo sapiens GN=ITGB5 PE=1 SV=1	HUMAN	2	sp	P18084	ITB5_HUMAN
629	1.45	1.45	6.897	4.187	4.187	sp|Q9BS26|ERP44_HUMAN	Endoplasmic reticulum resident protein 44 OS=Homo sapiens GN=ERP44 PE=1 SV=1	HUMAN	2	sp	Q9BS26	ERP44_HUMAN
635	1.42	1.6	9.444	3.222	2	tr|K4DI93|K4DI93_HUMAN	Cullin 4B, isoform CRA_e OS=Homo sapiens GN=CUL4B PE=1 SV=1	HUMAN	2	tr	K4DI93	K4DI93_HUMAN
646	1.31	29.18	29.31	25.36	21.17	sp|Q15063|POSTN_HUMAN	Periostin OS=Homo sapiens GN=POSTN PE=1 SV=2	HUMAN	21	sp	Q15063	POSTN_HUMAN
650	1.3	1.31	27.13	18.62	17.55	tr|C9JZL8|C9JZL8_HUMAN	Myeloid-associated differentiation marker (Fragment) OS=Homo sapiens GN=MYADM PE=1 SV=1	HUMAN	2	tr	C9JZL8	C9JZL8_HUMAN
658	1.24	3.77	5.791	2.45	1.893	sp|Q92973|TNPO1_HUMAN	Transportin-1 OS=Homo sapiens GN=TNPO1 PE=1 SV=2	HUMAN	2	sp	Q92973	TNPO1_HUMAN
671	1.16	3.36	12.68	10.14	7.609	sp|P28062|PSB8_HUMAN	Proteasome subunit beta type-8 OS=Homo sapiens GN=PSMB8 PE=1 SV=3	HUMAN	2	sp	P28062	PSB8_HUMAN
682	1.12	1.12	10.77	3.516	3.516	sp|P07099|HYEP_HUMAN	Epoxide hydrolase 1 OS=Homo sapiens GN=EPHX1 PE=1 SV=1	HUMAN	2	sp	P07099	HYEP_HUMAN
684	1.11	1.11	8.968	2.19	2.19	sp|Q86Y38|XYLT1_HUMAN	Xylosyltransferase 1 OS=Homo sapiens GN=XYLT1 PE=1 SV=1	HUMAN	2	sp	Q86Y38	XYLT1_HUMAN
694	1.05	1.05	11.71	6.607	6.607	sp|P07711|CATL1_HUMAN	Cathepsin L1 OS=Homo sapiens GN=CTSL PE=1 SV=2	HUMAN	2	sp	P07711	CATL1_HUMAN
696	1.03	1.03	38.1	38.1	38.1	tr|A0A075B6Z2|A0A075B6Z2_HUMAN	Protein TRAJ56 (Fragment) OS=Homo sapiens GN=TRAJ56 PE=4 SV=1	HUMAN	2	tr	A0A075B6Z2	A0A075B6Z2_HUMAN
699	0.95	7.4	21.92	10.96	6.538	sp|Q8N1N4|K2C78_HUMAN	Keratin, type II cytoskeletal 78 OS=Homo sapiens GN=KRT78 PE=2 SV=2	HUMAN	5	sp	Q8N1N4	K2C78_HUMAN
700	0.95	0.95	16.11	4.322	4.322	tr|C9JMV9|C9JMV9_HUMAN	Protein ABHD14A-ACY1 OS=Homo sapiens GN=ABHD14A-ACY1 PE=4 SV=1	HUMAN	2	tr	C9JMV9	C9JMV9_HUMAN
730	0.73	2.08	3.284	0.8326	0.555	RRRRRtr|F8VPD4|F8VPD4_HUMAN	REVERSED CAD protein OS=Homo sapiens GN=CAD PE=1 SV=1	HUMAN	2	RRRRRtr	F8VPD4	F8VPD4_HUMAN
744	0.68	2.51	3.42	0.3946	0.3946	RRRRRtr|E9PGC8|E9PGC8_HUMAN	REVERSED Microtubule-associated protein 1A OS=Homo sapiens GN=MAP1A PE=1 SV=1	HUMAN	2	RRRRRtr	E9PGC8	E9PGC8_HUMAN
748	0.66	2.81	32.67	27.33	14	tr|C9J1Z8|C9J1Z8_HUMAN	ADP-ribosylation factor 5 (Fragment) OS=Homo sapiens GN=ARF5 PE=1 SV=1	HUMAN	3	tr	C9J1Z8	C9J1Z8_HUMAN
757	0.63	1.23	21.1	1.679	1.679	sp|P28300|LYOX_HUMAN	Protein-lysine 6-oxidase OS=Homo sapiens GN=LOX PE=1 SV=2	HUMAN	2	sp	P28300	LYOX_HUMAN
763	0.59	4.33	37.09	20.53	19.87	sp|P62277|RS13_HUMAN	40S ribosomal protein S13 OS=Homo sapiens GN=RPS13 PE=1 SV=2	HUMAN	3	sp	P62277	RS13_HUMAN
768	0.57	14.61	32.21	17.6	11.05	sp|P19013|K2C4_HUMAN	Keratin, type II cytoskeletal 4 OS=Homo sapiens GN=KRT4 PE=1 SV=4	HUMAN	8	sp	P19013	K2C4_HUMAN
786	0.51	2.67	5.345	1.002	1.002	sp|Q05707|COEA1_HUMAN	Collagen alpha-1(XIV) chain OS=Homo sapiens GN=COL14A1 PE=1 SV=3	HUMAN	2	sp	Q05707	COEA1_HUMAN
802	0.45	20.92	47.69	32.87	19.21	sp|Q04695|K1C17_HUMAN	Keratin, type I cytoskeletal 17 OS=Homo sapiens GN=KRT17 PE=1 SV=2	HUMAN	14	sp	Q04695	K1C17_HUMAN
812	0.41	0.65	9.212	2.764	1.74	sp|O95782|AP2A1_HUMAN	AP-2 complex subunit alpha-1 OS=Homo sapiens GN=AP2A1 PE=1 SV=3	HUMAN	2	sp	O95782	AP2A1_HUMAN
834	0.35	0.71	6.247	1.981	0.7618	sp|Q05BV3|EMAL5_HUMAN	Echinoderm microtubule-associated protein-like 5 OS=Homo sapiens GN=EML5 PE=2 SV=3	HUMAN	2	sp	Q05BV3	EMAL5_HUMAN
866	0.28	41.63	54.23	49.9	40.41	tr|H3BTN5|H3BTN5_HUMAN	Pyruvate kinase (Fragment) OS=Homo sapiens GN=PKM PE=1 SV=1	HUMAN	26	tr	H3BTN5	H3BTN5_HUMAN
936	0.17	3.01	15.88	8.529	7.059	sp|P62873|GBB1_HUMAN	Guanine nucleotide-binding protein G(I)/G(S)/G(T) subunit beta-1 OS=Homo sapiens GN=GNB1 PE=1 SV=3	HUMAN	3	sp	P62873	GBB1_HUMAN
1043	0.09	0.3	4.124	4.124	4.124	RRRRRsp|Q5JXC2|MIIP_HUMAN	REVERSED Migration and invasion-inhibitory protein OS=Homo sapiens GN=MIIP PE=1 SV=3	HUMAN	2	RRRRRsp	Q5JXC2	MIIP_HUMAN
1092	0.07	12.88	30.97	11.76	8.304	sp|Q7Z794|K2C1B_HUMAN	Keratin, type II cytoskeletal 1b OS=Homo sapiens GN=KRT77 PE=2 SV=3	HUMAN	10	sp	Q7Z794	K2C1B_HUMAN
1093	0.07	11.23	22	13	10.75	sp|P08727|K1C19_HUMAN	Keratin, type I cytoskeletal 19 OS=Homo sapiens GN=KRT19 PE=1 SV=4	HUMAN	7	sp	P08727	K1C19_HUMAN
1095	0.07	2.43	3.589	0.793	0.4174	RRRRRtr|H3BRD5|H3BRD5_HUMAN	REVERSED Unconventional myosin-IXa OS=Homo sapiens GN=MYO9A PE=1 SV=1	HUMAN	2	RRRRRtr	H3BRD5	H3BRD5_HUMAN
1119	0.06	2.71	4.943	0.5731	0.2388	RRRRRtr|H0Y7V4|H0Y7V4_HUMAN	REVERSED Dynein heavy chain 8, axonemal OS=Homo sapiens GN=DNAH8 PE=1 SV=1	HUMAN	2	RRRRRtr	H0Y7V4	H0Y7V4_HUMAN
1120	0.06	2.48	5.972	2.18	1.137	tr|J3QLU9|J3QLU9_HUMAN	Receptor protein-tyrosine kinase OS=Homo sapiens GN=ERBB2 PE=1 SV=1	HUMAN	2	tr	J3QLU9	J3QLU9_HUMAN
1164	0.05	6.57	12.68	3.058	1.604	sp|Q7Z406|MYH14_HUMAN	Myosin-14 OS=Homo sapiens GN=MYH14 PE=1 SV=2	HUMAN	4	sp	Q7Z406	MYH14_HUMAN

## Sheet: BM MSC REP sample 151129
BM	Unused	Total	%Cov	%Cov(50)	%Cov(95)	Accession	Name	Species	Peptides(95%)			Biological Processes	Molecular Function	PANTHER ID
1	519.18	519.18	88.47	82.86	80.05	sp|P02751|FINC_HUMAN	Fibronectin OS=Homo sapiens GN=FN1 PE=1 SV=4	HUMAN	806
2	291.26	291.26	59.91	55.08	53.84	sp|Q99715|COCA1_HUMAN	Collagen alpha-1(XII) chain OS=Homo sapiens GN=COL12A1 PE=1 SV=2	HUMAN	224
3	275.67	275.67	60.88	53.7	51.27	sp|P12111|CO6A3_HUMAN	Collagen alpha-3(VI) chain OS=Homo sapiens GN=COL6A3 PE=1 SV=5	HUMAN	172
4	254	255.91	94	87.99	86.24	sp|P08123|CO1A2_HUMAN	Collagen alpha-2(I) chain OS=Homo sapiens GN=COL1A2 PE=1 SV=7	HUMAN	635
5	167.54	167.54	50.09	45.11	43.56	sp|P21333|FLNA_HUMAN	Filamin-A OS=Homo sapiens GN=FLNA PE=1 SV=4	HUMAN	94
5	0	165.58	49.79	44.73	43.15	tr|Q5HY54|Q5HY54_HUMAN	Filamin-A OS=Homo sapiens GN=FLNA PE=1 SV=1	HUMAN	93
5	0	165.56	49.96	44.92	43.36	tr|Q60FE5|Q60FE5_HUMAN	Filamin A OS=Homo sapiens GN=FLNA PE=1 SV=1	HUMAN	93
6	154.84	154.84	54.34	46.94	44.23	sp|P35579|MYH9_HUMAN	Myosin-9 OS=Homo sapiens GN=MYH9 PE=1 SV=4	HUMAN	85
7	145.43	147.7	72.81	61.2	59.56	sp|P02452|CO1A1_HUMAN	Collagen alpha-1(I) chain OS=Homo sapiens GN=COL1A1 PE=1 SV=5	HUMAN	275
8	129.88	129.88	75.62	74.69	74.69	sp|P04264|K2C1_HUMAN	Keratin, type II cytoskeletal 1 OS=Homo sapiens GN=KRT1 PE=1 SV=6	HUMAN	137
9	111.68	111.68	48.63	41.2	38.38	sp|P07996|TSP1_HUMAN	Thrombospondin-1 OS=Homo sapiens GN=THBS1 PE=1 SV=2	HUMAN	106
10	109.78	110.13	43.01	39.32	36.18	tr|A0A0A0MTC7|A0A0A0MTC7_HUMAN	Laminin subunit alpha-4 OS=Homo sapiens GN=LAMA4 PE=1 SV=1	HUMAN	55
10	0	110.11	42.84	39.17	36.04	tr|A0A0A0MQS9|A0A0A0MQS9_HUMAN	Laminin subunit alpha-4 OS=Homo sapiens GN=LAMA4 PE=1 SV=1	HUMAN	55
10	0	110.11	42.84	39.17	36.04	sp|Q16363|LAMA4_HUMAN	Laminin subunit alpha-4 OS=Homo sapiens GN=LAMA4 PE=1 SV=4	HUMAN	55
11	109.58	109.58	54	50.39	46.78	tr|A0A087X0S5|A0A087X0S5_HUMAN	Collagen alpha-1(VI) chain OS=Homo sapiens GN=COL6A1 PE=1 SV=1	HUMAN	84
11	0	109.58	53.89	50.29	46.69	sp|P12109|CO6A1_HUMAN	Collagen alpha-1(VI) chain OS=Homo sapiens GN=COL6A1 PE=1 SV=3	HUMAN	84
12	97.02	97.02	34.15	30.46	27.27	sp|P07942|LAMB1_HUMAN	Laminin subunit beta-1 OS=Homo sapiens GN=LAMB1 PE=1 SV=2	HUMAN	53
12	0	96.93	35.3	30.06	26.91	tr|G3XAI2|G3XAI2_HUMAN	Laminin subunit beta-1 OS=Homo sapiens GN=LAMB1 PE=1 SV=1	HUMAN	53
13	94.04	94.04	80.59	75.39	67.42	sp|P26038|MOES_HUMAN	Moesin OS=Homo sapiens GN=MSN PE=1 SV=3	HUMAN	57
14	93.15	93.15	93.42	89.25	85.23	sp|P35527|K1C9_HUMAN	Keratin, type I cytoskeletal 9 OS=Homo sapiens GN=KRT9 PE=1 SV=3	HUMAN	83
15	91.37	91.37	67.7	57.54	54.78	sp|Q15063|POSTN_HUMAN	Periostin OS=Homo sapiens GN=POSTN PE=1 SV=2	HUMAN	77
16	91.05	91.1	42.65	35.22	28.93	sp|P12882|MYH1_HUMAN	Myosin-1 OS=Homo sapiens GN=MYH1 PE=1 SV=3	HUMAN	51
17	90.05	90.05	69.62	60.54	56.39	sp|P12814|ACTN1_HUMAN	Alpha-actinin-1 OS=Homo sapiens GN=ACTN1 PE=1 SV=2	HUMAN	62
18	85.41	85.74	73.65	71.45	66.03	sp|Q15582|BGH3_HUMAN	Transforming growth factor-beta-induced protein ig-h3 OS=Homo sapiens GN=TGFBI PE=1 SV=1	HUMAN	91
19	84.79	84.79	21.79	15.08	14.21	sp|P98160|PGBM_HUMAN	Basement membrane-specific heparan sulfate proteoglycan core protein OS=Homo sapiens GN=HSPG2 PE=1 SV=4	HUMAN	53
20	80.95	83.71	61.82	56.34	52.23	sp|P13645|K1C10_HUMAN	Keratin, type I cytoskeletal 10 OS=Homo sapiens GN=KRT10 PE=1 SV=6	HUMAN	71
21	79.67	79.81	34.18	31.39	29.4	sp|P11047|LAMC1_HUMAN	Laminin subunit gamma-1 OS=Homo sapiens GN=LAMC1 PE=1 SV=3	HUMAN	43
22	77.74	96.2	89.2	79.97	75.12	sp|P35908|K22E_HUMAN	Keratin, type II cytoskeletal 2 epidermal OS=Homo sapiens GN=KRT2 PE=1 SV=2	HUMAN	59
23	75.9	75.9	76.52	73.33	64.24	sp|P08253|MMP2_HUMAN	72 kDa type IV collagenase OS=Homo sapiens GN=MMP2 PE=1 SV=2	HUMAN	79
24	75.45	75.45	60.24	58.1	57.03	sp|P11021|GRP78_HUMAN	78 kDa glucose-regulated protein OS=Homo sapiens GN=HSPA5 PE=1 SV=2	HUMAN	49
25	73.76	73.77	62.5	58.58	54.22	sp|P02545|LMNA_HUMAN	Prelamin-A/C OS=Homo sapiens GN=LMNA PE=1 SV=1	HUMAN	41
26	72.43	72.43	79.85	74.39	67.42	sp|P14618|KPYM_HUMAN	Pyruvate kinase PKM OS=Homo sapiens GN=PKM PE=1 SV=4	HUMAN	49
27	71.14	71.14	50.64	39.94	35.72	sp|P12110|CO6A2_HUMAN	Collagen alpha-2(VI) chain OS=Homo sapiens GN=COL6A2 PE=1 SV=4	HUMAN	51
28	68.93	70.49	78.54	73.39	67.38	sp|P08670|VIME_HUMAN	Vimentin OS=Homo sapiens GN=VIM PE=1 SV=4	HUMAN	48
29	68.72	85.41	35.55	26.44	22.75	sp|O75369|FLNB_HUMAN	Filamin-B OS=Homo sapiens GN=FLNB PE=1 SV=2	HUMAN	46
30	66.26	66.36	81.11	76.5	71.66	sp|P06733|ENOA_HUMAN	Alpha-enolase OS=Homo sapiens GN=ENO1 PE=1 SV=2	HUMAN	55
31	65.68	66.99	42.8	33.27	29.21	sp|Q92626|PXDN_HUMAN	Peroxidasin homolog OS=Homo sapiens GN=PXDN PE=1 SV=2	HUMAN	38
32	64.39	64.65	50.95	45.13	37.05	sp|P11217|PYGM_HUMAN	Glycogen phosphorylase, muscle form OS=Homo sapiens GN=PYGM PE=1 SV=6	HUMAN	45
33	63.33	81.6	27.96	21.06	19.08	sp|Q14315|FLNC_HUMAN	Filamin-C OS=Homo sapiens GN=FLNC PE=1 SV=3	HUMAN	41
34	63.21	63.21	45.11	44.98	40.56	sp|O00391|QSOX1_HUMAN	Sulfhydryl oxidase 1 OS=Homo sapiens GN=QSOX1 PE=1 SV=3	HUMAN	40
35	62.67	62.67	57.94	46.56	36.16	sp|P18206|VINC_HUMAN	Vinculin OS=Homo sapiens GN=VCL PE=1 SV=4	HUMAN	35
36	60.46	60.46	84.89	83.79	67.86	sp|P04075|ALDOA_HUMAN	Fructose-bisphosphate aldolase A OS=Homo sapiens GN=ALDOA PE=1 SV=2	HUMAN	71
36	0	60.32	83.15	78.8	67.12	tr|J3KPS3|J3KPS3_HUMAN	Fructose-bisphosphate aldolase OS=Homo sapiens GN=ALDOA PE=1 SV=1	HUMAN	71
37	60.28	60.28	51.24	46.4	42.06	sp|P55072|TERA_HUMAN	Transitional endoplasmic reticulum ATPase OS=Homo sapiens GN=VCP PE=1 SV=4	HUMAN	37
38	60.24	60.28	71.49	66.93	62.77	sp|P30101|PDIA3_HUMAN	Protein disulfide-isomerase A3 OS=Homo sapiens GN=PDIA3 PE=1 SV=4	HUMAN	34
39	58.45	58.45	79.82	72.59	68.37	sp|P00338|LDHA_HUMAN	L-lactate dehydrogenase A chain OS=Homo sapiens GN=LDHA PE=1 SV=2	HUMAN	49
40	57.82	68.55	71.61	64.83	59.96	sp|P02533|K1C14_HUMAN	Keratin, type I cytoskeletal 14 OS=Homo sapiens GN=KRT14 PE=1 SV=4	HUMAN	44
41	56.27	56.27	73.37	71.36	62.56	sp|P07093|GDN_HUMAN	Glia-derived nexin OS=Homo sapiens GN=SERPINE2 PE=1 SV=1	HUMAN	47
42	55.03	85.97	69.81	61.14	54.88	sp|O43707|ACTN4_HUMAN	Alpha-actinin-4 OS=Homo sapiens GN=ACTN4 PE=1 SV=2	HUMAN	64
43	54.55	54.55	72.64	69.4	69.4	sp|P05121|PAI1_HUMAN	Plasminogen activator inhibitor 1 OS=Homo sapiens GN=SERPINE1 PE=1 SV=1	HUMAN	68
44	53.94	55.9	36.27	30.26	29.96	sp|P08572|CO4A2_HUMAN	Collagen alpha-2(IV) chain OS=Homo sapiens GN=COL4A2 PE=1 SV=4	HUMAN	44
45	53.87	73.6	61.69	55.93	48.31	sp|P13647|K2C5_HUMAN	Keratin, type II cytoskeletal 5 OS=Homo sapiens GN=KRT5 PE=1 SV=3	HUMAN	49
46	51.91	51.91	69.62	65.31	60.29	sp|P50454|SERPH_HUMAN	Serpin H1 OS=Homo sapiens GN=SERPINH1 PE=1 SV=2	HUMAN	36
47	50.11	50.11	69.2	65.73	60.52	sp|Q02818|NUCB1_HUMAN	Nucleobindin-1 OS=Homo sapiens GN=NUCB1 PE=1 SV=4	HUMAN	32
48	49.39	49.39	47.95	41.72	34.37	sp|P14625|ENPL_HUMAN	Endoplasmin OS=Homo sapiens GN=HSP90B1 PE=1 SV=1	HUMAN	29
49	48.81	58.78	78.11	74.88	64.98	sp|P13929|ENOB_HUMAN	Beta-enolase OS=Homo sapiens GN=ENO3 PE=1 SV=5	HUMAN	53
50	47.31	47.31	51.03	46.91	44.15	sp|Q02809|PLOD1_HUMAN	Procollagen-lysine,2-oxoglutarate 5-dioxygenase 1 OS=Homo sapiens GN=PLOD1 PE=1 SV=2	HUMAN	30
51	47.05	47.05	59.96	55.87	48.93	sp|P36871|PGM1_HUMAN	Phosphoglucomutase-1 OS=Homo sapiens GN=PGM1 PE=1 SV=3	HUMAN	34
52	47.01	47.01	73.16	67.26	54.28	sp|P07355|ANXA2_HUMAN	Annexin A2 OS=Homo sapiens GN=ANXA2 PE=1 SV=2	HUMAN	29
53	46.03	46.03	81.45	67.34	58.47	sp|P67936|TPM4_HUMAN	Tropomyosin alpha-4 chain OS=Homo sapiens GN=TPM4 PE=1 SV=3	HUMAN	24
54	45.93	45.93	32.43	17.46	17.46	tr|A0A087WXW9|A0A087WXW9_HUMAN	Collagen alpha-1(V) chain OS=Homo sapiens GN=COL5A1 PE=1 SV=1	HUMAN	32
55	45.82	45.93	91.54	75.12	75.12	sp|Q01995|TAGL_HUMAN	Transgelin OS=Homo sapiens GN=TAGLN PE=1 SV=4	HUMAN	47
56	45.25	45.25	72	72	65.87	sp|P63261|ACTG_HUMAN	Actin, cytoplasmic 2 OS=Homo sapiens GN=ACTG1 PE=1 SV=1	HUMAN	46
56	0	45.13	67.47	67.47	65.87	sp|P60709|ACTB_HUMAN	Actin, cytoplasmic 1 OS=Homo sapiens GN=ACTB PE=1 SV=1	HUMAN	46
57	45.07	45.07	22.68	20.2	17.45	tr|G3V3X5|G3V3X5_HUMAN	Latent-transforming growth factor beta-binding protein 2 OS=Homo sapiens GN=LTBP2 PE=1 SV=1	HUMAN	26
57	0	45.04	22.13	19.71	17.02	sp|Q14767|LTBP2_HUMAN	Latent-transforming growth factor beta-binding protein 2 OS=Homo sapiens GN=LTBP2 PE=1 SV=3	HUMAN	26
57	0	43.06	21.25	18.77	16	tr|G3V511|G3V511_HUMAN	Latent-transforming growth factor beta-binding protein 2 OS=Homo sapiens GN=LTBP2 PE=1 SV=1	HUMAN	25
58	44.68	44.75	19.83	10.7	8.497	sp|Q15149|PLEC_HUMAN	Plectin OS=Homo sapiens GN=PLEC PE=1 SV=3	HUMAN	34
59	44.12	46.34	26.08	20.41	18.85	sp|P55268|LAMB2_HUMAN	Laminin subunit beta-2 OS=Homo sapiens GN=LAMB2 PE=1 SV=2	HUMAN	25
60	42.75	48.16	54.02	46.9	46.9	sp|P11142|HSP7C_HUMAN	Heat shock cognate 71 kDa protein OS=Homo sapiens GN=HSPA8 PE=1 SV=1	HUMAN	35
60	0	46.07	52.79	45.45	45.45	tr|E9PKE3|E9PKE3_HUMAN	Heat shock cognate 71 kDa protein OS=Homo sapiens GN=HSPA8 PE=1 SV=1	HUMAN	34
61	42.24	42.7	36.02	27.62	25.02	sp|P05997|CO5A2_HUMAN	Collagen alpha-2(V) chain OS=Homo sapiens GN=COL5A2 PE=1 SV=3	HUMAN	41
62	41.65	41.65	71.26	62.01	57.09	sp|P07237|PDIA1_HUMAN	Protein disulfide-isomerase OS=Homo sapiens GN=P4HB PE=1 SV=3	HUMAN	25
63	41.49	49.67	33.62	29.01	28.5	sp|P35442|TSP2_HUMAN	Thrombospondin-2 OS=Homo sapiens GN=THBS2 PE=1 SV=2	HUMAN	38
64	41.46	45.74	30.08	23.81	20.4	sp|P02461|CO3A1_HUMAN	Collagen alpha-1(III) chain OS=Homo sapiens GN=COL3A1 PE=1 SV=4	HUMAN	43
65	40.32	41.79	53.64	42.48	37.83	sp|P13667|PDIA4_HUMAN	Protein disulfide-isomerase A4 OS=Homo sapiens GN=PDIA4 PE=1 SV=2	HUMAN	27
66	39.82	39.82	16.86	10.94	10.38	sp|P35555|FBN1_HUMAN	Fibrillin-1 OS=Homo sapiens GN=FBN1 PE=1 SV=3	HUMAN	29
67	39.48	39.48	77.22	63.31	55.4	sp|P00558|PGK1_HUMAN	Phosphoglycerate kinase 1 OS=Homo sapiens GN=PGK1 PE=1 SV=3	HUMAN	33
68	39.37	39.8	39.96	36.32	29.23	sp|Q9Y6C2|EMIL1_HUMAN	EMILIN-1 OS=Homo sapiens GN=EMILIN1 PE=1 SV=2	HUMAN	20
69	38.53	38.61	28.74	15.01	9.195	sp|P15924|DESP_HUMAN	Desmoplakin OS=Homo sapiens GN=DSP PE=1 SV=3	HUMAN	24
70	38.18	38.24	38.89	25.58	25.45	sp|Q9Y4K0|LOXL2_HUMAN	Lysyl oxidase homolog 2 OS=Homo sapiens GN=LOXL2 PE=1 SV=1	HUMAN	28
71	37.72	37.74	46.04	36.32	35.68	sp|P06396|GELS_HUMAN	Gelsolin OS=Homo sapiens GN=GSN PE=1 SV=1	HUMAN	23
71	0	37.74	44.59	37.03	36.38	tr|A0A0A0MT01|A0A0A0MT01_HUMAN	Gelsolin OS=Homo sapiens GN=GSN PE=1 SV=1	HUMAN	23
71	0	37.74	45.72	37.97	37.3	tr|A0A0A0MS51|A0A0A0MS51_HUMAN	Gelsolin OS=Homo sapiens GN=GSN PE=1 SV=1	HUMAN	23
72	37.11	37.11	26.51	22.8	19.78	sp|Q8IUX7|AEBP1_HUMAN	Adipocyte enhancer-binding protein 1 OS=Homo sapiens GN=AEBP1 PE=1 SV=1	HUMAN	22
73	36.95	37.12	63.23	58.77	55.99	sp|P07585|PGS2_HUMAN	Decorin OS=Homo sapiens GN=DCN PE=1 SV=1	HUMAN	29
74	36.71	37.21	36.75	29.92	25.41	sp|P07900|HS90A_HUMAN	Heat shock protein HSP 90-alpha OS=Homo sapiens GN=HSP90AA1 PE=1 SV=5	HUMAN	20
75	36.39	36.39	28.23	22.77	18.36	sp|P14543|NID1_HUMAN	Nidogen-1 OS=Homo sapiens GN=NID1 PE=1 SV=3	HUMAN	20
76	35.95	35.95	33.79	22.89	19.8	sp|P53396|ACLY_HUMAN	ATP-citrate synthase OS=Homo sapiens GN=ACLY PE=1 SV=3	HUMAN	20
77	35.87	35.87	85.07	76.42	66.27	sp|P04406|G3P_HUMAN	Glyceraldehyde-3-phosphate dehydrogenase OS=Homo sapiens GN=GAPDH PE=1 SV=3	HUMAN	54
78	34.99	34.99	36.21	26.11	23.58	sp|Q76M96|CCD80_HUMAN	Coiled-coil domain-containing protein 80 OS=Homo sapiens GN=CCDC80 PE=1 SV=1	HUMAN	19
79	34.12	34.55	70.23	60.31	48.3	sp|P36222|CH3L1_HUMAN	Chitinase-3-like protein 1 OS=Homo sapiens GN=CHI3L1 PE=1 SV=2	HUMAN	36
80	33.61	33.61	54.97	49.91	45.38	tr|A0A0A0MTS2|A0A0A0MTS2_HUMAN	Glucose-6-phosphate isomerase (Fragment) OS=Homo sapiens GN=GPI PE=1 SV=1	HUMAN	23
80	0	33.61	56.45	51.25	46.59	sp|P06744|G6PI_HUMAN	Glucose-6-phosphate isomerase OS=Homo sapiens GN=GPI PE=1 SV=4	HUMAN	23
81	33.37	33.37	60.89	52.76	41.99	sp|P06732|KCRM_HUMAN	Creatine kinase M-type OS=Homo sapiens GN=CKM PE=1 SV=2	HUMAN	29
82	32.9	32.9	58.59	44.78	42.05	sp|P29401|TKT_HUMAN	Transketolase OS=Homo sapiens GN=TKT PE=1 SV=3	HUMAN	21
83	32.15	32.19	49.36	35.56	31.86	tr|E7ETU9|E7ETU9_HUMAN	Procollagen-lysine,2-oxoglutarate 5-dioxygenase 2 OS=Homo sapiens GN=PLOD2 PE=1 SV=1	HUMAN	18
84	32.03	32.03	56.82	55.45	51.59	sp|Q15084|PDIA6_HUMAN	Protein disulfide-isomerase A6 OS=Homo sapiens GN=PDIA6 PE=1 SV=1	HUMAN	17
85	30.82	30.82	60.63	59.41	56.45	sp|Q08397|LOXL1_HUMAN	Lysyl oxidase homolog 1 OS=Homo sapiens GN=LOXL1 PE=1 SV=2	HUMAN	21
86	30.1	30.12	51.31	38.43	33.21	tr|E9PGZ1|E9PGZ1_HUMAN	Caldesmon OS=Homo sapiens GN=CALD1 PE=1 SV=1	HUMAN	17
87	29.83	29.83	35.43	25.06	20.28	sp|P13639|EF2_HUMAN	Elongation factor 2 OS=Homo sapiens GN=EEF2 PE=1 SV=4	HUMAN	18
88	29.69	29.69	54.46	54.46	48.12	tr|Q5JP53|Q5JP53_HUMAN	Tubulin beta chain OS=Homo sapiens GN=TUBB PE=1 SV=1	HUMAN	21
88	0	29.69	52.25	52.25	46.17	sp|P07437|TBB5_HUMAN	Tubulin beta chain OS=Homo sapiens GN=TUBB PE=1 SV=2	HUMAN	21
89	29.5	31.98	50.82	48.1	41.3	sp|P21810|PGS1_HUMAN	Biglycan OS=Homo sapiens GN=BGN PE=1 SV=2	HUMAN	20
90	29.21	29.21	40.99	28.31	26.2	sp|P19338|NUCL_HUMAN	Nucleolin OS=Homo sapiens GN=NCL PE=1 SV=3	HUMAN	15
91	28.7	28.7	62.02	51.69	43.15	sp|P50395|GDIB_HUMAN	Rab GDP dissociation inhibitor beta OS=Homo sapiens GN=GDI2 PE=1 SV=2	HUMAN	17
92	28.45	28.52	44.99	32.18	24.3	sp|P02768|ALBU_HUMAN	Serum albumin OS=Homo sapiens GN=ALB PE=1 SV=2	HUMAN	30
92	0	27.3	47.17	35.02	25.3	tr|B7WNR0|B7WNR0_HUMAN	Serum albumin OS=Homo sapiens GN=ALB PE=1 SV=1	HUMAN	27
93	28.2	28.2	59.74	48.72	37.95	sp|P29508|SPB3_HUMAN	Serpin B3 OS=Homo sapiens GN=SERPINB3 PE=1 SV=2	HUMAN	18
94	28.07	28.07	68.79	60.28	46.45	sp|Q16270|IBP7_HUMAN	Insulin-like growth factor-binding protein 7 OS=Homo sapiens GN=IGFBP7 PE=1 SV=1	HUMAN	26
95	27.99	27.99	60.69	51.45	49.42	sp|P04083|ANXA1_HUMAN	Annexin A1 OS=Homo sapiens GN=ANXA1 PE=1 SV=2	HUMAN	15
96	27.86	27.87	21.68	9.172	8.242	tr|A0A087WUZ3|A0A087WUZ3_HUMAN	Spectrin beta chain, non-erythrocytic 1 OS=Homo sapiens GN=SPTBN1 PE=1 SV=1	HUMAN	16
96	0	27.87	21.7	9.179	8.249	sp|Q01082|SPTB2_HUMAN	Spectrin beta chain, non-erythrocytic 1 OS=Homo sapiens GN=SPTBN1 PE=1 SV=2	HUMAN	16
97	27.8	46.78	59.73	44.71	43.17	tr|E7EQR4|E7EQR4_HUMAN	Ezrin OS=Homo sapiens GN=EZR PE=1 SV=3	HUMAN	29
97	0	46.78	59.73	44.71	43.17	sp|P15311|EZRI_HUMAN	Ezrin OS=Homo sapiens GN=EZR PE=1 SV=4	HUMAN	29
98	27.8	27.8	44.13	42.49	39.67	sp|P08476|INHBA_HUMAN	Inhibin beta A chain OS=Homo sapiens GN=INHBA PE=1 SV=2	HUMAN	20
99	27.75	27.75	59.69	52.56	45.21	sp|Q15113|PCOC1_HUMAN	Procollagen C-endopeptidase enhancer 1 OS=Homo sapiens GN=PCOLCE PE=1 SV=2	HUMAN	22
100	27.29	27.29	73.15	67.13	60.65	sp|P23284|PPIB_HUMAN	Peptidyl-prolyl cis-trans isomerase B OS=Homo sapiens GN=PPIB PE=1 SV=2	HUMAN	22
101	27.25	27.61	62.2	56.7	41.15	sp|P36955|PEDF_HUMAN	Pigment epithelium-derived factor OS=Homo sapiens GN=SERPINF1 PE=1 SV=4	HUMAN	18
102	27.14	27.14	36.73	29.34	23.07	sp|Q14764|MVP_HUMAN	Major vault protein OS=Homo sapiens GN=MVP PE=1 SV=4	HUMAN	14
103	26.83	59.15	74	66.17	58.14	sp|P08779|K1C16_HUMAN	Keratin, type I cytoskeletal 16 OS=Homo sapiens GN=KRT16 PE=1 SV=4	HUMAN	39
104	26.46	62.4	65.43	56.74	48.05	sp|P02538|K2C6A_HUMAN	Keratin, type II cytoskeletal 6A OS=Homo sapiens GN=KRT6A PE=1 SV=3	HUMAN	42
105	26.21	26.21	41.41	35.44	32.01	sp|P25705|ATPA_HUMAN	ATP synthase subunit alpha, mitochondrial OS=Homo sapiens GN=ATP5A1 PE=1 SV=1	HUMAN	14
106	25.47	25.47	55.65	52.15	48.66	sp|P09651|ROA1_HUMAN	Heterogeneous nuclear ribonucleoprotein A1 OS=Homo sapiens GN=HNRNPA1 PE=1 SV=5	HUMAN	19
106	0	25.31	62.87	58.63	54.4	tr|F8W6I7|F8W6I7_HUMAN	Heterogeneous nuclear ribonucleoprotein A1 OS=Homo sapiens GN=HNRNPA1 PE=1 SV=2	HUMAN	18
107	25.3	25.3	58.1	53.36	46.25	sp|P15259|PGAM2_HUMAN	Phosphoglycerate mutase 2 OS=Homo sapiens GN=PGAM2 PE=1 SV=3	HUMAN	16
108	25.1	25.14	19	13.22	10.66	tr|A0A087WVQ6|A0A087WVQ6_HUMAN	Clathrin heavy chain OS=Homo sapiens GN=CLTC PE=1 SV=1	HUMAN	13
108	0	25.14	19.04	13.25	10.69	sp|Q00610|CLH1_HUMAN	Clathrin heavy chain 1 OS=Homo sapiens GN=CLTC PE=1 SV=5	HUMAN	13
109	24.9	24.9	56.93	42.86	35.39	sp|P03956|MMP1_HUMAN	Interstitial collagenase OS=Homo sapiens GN=MMP1 PE=1 SV=3	HUMAN	17
110	24.86	25.82	35.47	30.54	30.54	sp|Q9NRN5|OLFL3_HUMAN	Olfactomedin-like protein 3 OS=Homo sapiens GN=OLFML3 PE=2 SV=1	HUMAN	18
111	24.78	24.81	17.98	15.67	14.31	sp|P01023|A2MG_HUMAN	Alpha-2-macroglobulin OS=Homo sapiens GN=A2M PE=1 SV=3	HUMAN	26
112	24.64	24.64	25.11	19.81	18.22	sp|Q14697|GANAB_HUMAN	Neutral alpha-glucosidase AB OS=Homo sapiens GN=GANAB PE=1 SV=3	HUMAN	14
113	24.37	24.37	82.17	66.78	52.1	sp|P60174|TPIS_HUMAN	Triosephosphate isomerase OS=Homo sapiens GN=TPI1 PE=1 SV=3	HUMAN	18
114	24.21	24.21	32.82	27.26	21.84	tr|B4DPQ0|B4DPQ0_HUMAN	Complement C1r subcomponent OS=Homo sapiens GN=C1R PE=1 SV=1	HUMAN	16
114	0	24.21	33.48	27.8	22.27	sp|P00736|C1R_HUMAN	Complement C1r subcomponent OS=Homo sapiens GN=C1R PE=1 SV=2	HUMAN	16
114	0	24	33.98	28.02	23.4	tr|F5H2D0|F5H2D0_HUMAN	Complement C1r subcomponent OS=Homo sapiens GN=C1R PE=1 SV=3	HUMAN	16
115	24.18	24.18	25.99	18.76	15.6	sp|O94985|CSTN1_HUMAN	Calsyntenin-1 OS=Homo sapiens GN=CLSTN1 PE=1 SV=1	HUMAN	13
116	24	24.96	35.65	35.65	32.56	tr|F5H5D3|F5H5D3_HUMAN	Tubulin alpha-1C chain OS=Homo sapiens GN=TUBA1C PE=1 SV=1	HUMAN	16
116	0	24.96	41.2	41.2	37.64	sp|Q9BQE3|TBA1C_HUMAN	Tubulin alpha-1C chain OS=Homo sapiens GN=TUBA1C PE=1 SV=1	HUMAN	16
116	0	24.96	41.02	41.02	37.47	sp|P68363|TBA1B_HUMAN	Tubulin alpha-1B chain OS=Homo sapiens GN=TUBA1B PE=1 SV=1	HUMAN	16
117	23.59	23.59	70.8	55.81	48.06	sp|Q08431|MFGM_HUMAN	Lactadherin OS=Homo sapiens GN=MFGE8 PE=1 SV=2	HUMAN	21
117	0	23.57	71.14	54.23	49.56	tr|F5GZN3|F5GZN3_HUMAN	Lactadherin OS=Homo sapiens GN=MFGE8 PE=1 SV=1	HUMAN	20
118	23.32	23.76	22.17	11.17	7.686	sp|Q13813|SPTN1_HUMAN	Spectrin alpha chain, non-erythrocytic 1 OS=Homo sapiens GN=SPTAN1 PE=1 SV=3	HUMAN	13
119	22.91	22.91	32.21	27.52	22.55	sp|P14923|PLAK_HUMAN	Junction plakoglobin OS=Homo sapiens GN=JUP PE=1 SV=3	HUMAN	18
120	22.21	22.27	43.33	37.41	35.74	sp|Q16610|ECM1_HUMAN	Extracellular matrix protein 1 OS=Homo sapiens GN=ECM1 PE=1 SV=2	HUMAN	18
121	21.97	22	59.35	56.5	47.56	tr|E7EX29|E7EX29_HUMAN	14-3-3 protein zeta/delta (Fragment) OS=Homo sapiens GN=YWHAZ PE=1 SV=1	HUMAN	13
121	0	22	59.59	56.73	47.76	sp|P63104|1433Z_HUMAN	14-3-3 protein zeta/delta OS=Homo sapiens GN=YWHAZ PE=1 SV=1	HUMAN	13
122	21.71	21.71	42.31	39.94	37.57	sp|P51884|LUM_HUMAN	Lumican OS=Homo sapiens GN=LUM PE=1 SV=2	HUMAN	13
123	21.56	22.7	17.62	10.46	8.419	sp|P01024|CO3_HUMAN	Complement C3 OS=Homo sapiens GN=C3 PE=1 SV=2	HUMAN	19
124	21.45	21.45	54.77	52.26	44.22	sp|Q06830|PRDX1_HUMAN	Peroxiredoxin-1 OS=Homo sapiens GN=PRDX1 PE=1 SV=1	HUMAN	18
124	0	21.43	60.82	60.82	51.46	tr|A0A0A0MSI0|A0A0A0MSI0_HUMAN	Peroxiredoxin-1 (Fragment) OS=Homo sapiens GN=PRDX1 PE=1 SV=1	HUMAN	18
125	21.15	21.15	48.61	38.7	38.7	tr|A0A0A6YY95|A0A0A6YY95_HUMAN	C-type lectin domain family 11 member A OS=Homo sapiens GN=CLEC11A PE=1 SV=1	HUMAN	14
125	0	21.15	48.61	38.7	38.7	sp|Q9Y240|CLC11_HUMAN	C-type lectin domain family 11 member A OS=Homo sapiens GN=CLEC11A PE=1 SV=1	HUMAN	14
126	20.93	22.96	26.25	13.75	12.95	sp|Q14112|NID2_HUMAN	Nidogen-2 OS=Homo sapiens GN=NID2 PE=1 SV=3	HUMAN	12
127	20.64	21.03	32.79	26.02	23.71	sp|O60568|PLOD3_HUMAN	Procollagen-lysine,2-oxoglutarate 5-dioxygenase 3 OS=Homo sapiens GN=PLOD3 PE=1 SV=1	HUMAN	13
128	20.37	20.38	33.02	28.1	22.86	sp|P13797|PLST_HUMAN	Plastin-3 OS=Homo sapiens GN=PLS3 PE=1 SV=4	HUMAN	13
128	0	18.61	29.5	24.47	22.85	tr|A0A0A0MSQ0|A0A0A0MSQ0_HUMAN	Plastin-3 OS=Homo sapiens GN=PLS3 PE=1 SV=1	HUMAN	12
129	20.31	35.9	51.53	45.4	38.34	tr|Q6ZN40|Q6ZN40_HUMAN	Tropomyosin 1 (Alpha), isoform CRA_f OS=Homo sapiens GN=TPM1 PE=1 SV=1	HUMAN	21
130	20.19	20.19	45.42	38.75	32.71	sp|O43854|EDIL3_HUMAN	EGF-like repeat and discoidin I-like domain-containing protein 3 OS=Homo sapiens GN=EDIL3 PE=1 SV=1	HUMAN	14
131	20.03	20.03	26.37	17.14	14.51	sp|Q7KZF4|SND1_HUMAN	Staphylococcal nuclease domain-containing protein 1 OS=Homo sapiens GN=SND1 PE=1 SV=1	HUMAN	10
132	20.02	20.07	59.69	50.31	45.94	sp|P08758|ANXA5_HUMAN	Annexin A5 OS=Homo sapiens GN=ANXA5 PE=1 SV=2	HUMAN	12
133	19.84	19.84	20.13	15.88	14.74	sp|P22314|UBA1_HUMAN	Ubiquitin-like modifier-activating enzyme 1 OS=Homo sapiens GN=UBA1 PE=1 SV=3	HUMAN	10
134	19.81	19.93	40.09	35.59	26.28	sp|O75326|SEM7A_HUMAN	Semaphorin-7A OS=Homo sapiens GN=SEMA7A PE=1 SV=1	HUMAN	15
134	0	17.88	43.31	37.33	30.14	tr|F5GYX3|F5GYX3_HUMAN	Semaphorin-7A OS=Homo sapiens GN=SEMA7A PE=1 SV=1	HUMAN	13
135	19.43	24.14	55.69	44.61	40.72	sp|P07195|LDHB_HUMAN	L-lactate dehydrogenase B chain OS=Homo sapiens GN=LDHB PE=1 SV=2	HUMAN	19
136	19.41	19.41	25.58	24.71	20.49	sp|P09871|C1S_HUMAN	Complement C1s subcomponent OS=Homo sapiens GN=C1S PE=1 SV=1	HUMAN	12
136	0	18.54	23.17	21.55	17.3	tr|A0A087X232|A0A087X232_HUMAN	Complement C1s subcomponent OS=Homo sapiens GN=C1S PE=1 SV=1	HUMAN	11
137	19.36	19.36	40.39	39.9	36.21	sp|P60842|IF4A1_HUMAN	Eukaryotic initiation factor 4A-I OS=Homo sapiens GN=EIF4A1 PE=1 SV=1	HUMAN	12
138	19.27	19.27	47.08	46.74	42.27	sp|P17936|IBP3_HUMAN	Insulin-like growth factor-binding protein 3 OS=Homo sapiens GN=IGFBP3 PE=1 SV=2	HUMAN	17
139	18.9	18.9	13.17	10.05	6.885	tr|J3QSU6|J3QSU6_HUMAN	Tenascin OS=Homo sapiens GN=TNC PE=1 SV=1	HUMAN	11
139	0	18.49	12.09	9.223	6.315	sp|P24821|TENA_HUMAN	Tenascin OS=Homo sapiens GN=TNC PE=1 SV=3	HUMAN	11
139	0	16.87	11.67	9.232	5.913	tr|E9PC84|E9PC84_HUMAN	Tenascin OS=Homo sapiens GN=TNC PE=1 SV=1	HUMAN	10
140	18.89	18.9	33	28.2	22.2	sp|P05155|IC1_HUMAN	Plasma protease C1 inhibitor OS=Homo sapiens GN=SERPING1 PE=1 SV=2	HUMAN	12
140	0	16.76	30.94	23.76	18.23	tr|E9PGN7|E9PGN7_HUMAN	Plasma protease C1 inhibitor OS=Homo sapiens GN=SERPING1 PE=1 SV=1	HUMAN	11
141	18.86	18.86	26.15	23.08	21.71	sp|Q08380|LG3BP_HUMAN	Galectin-3-binding protein OS=Homo sapiens GN=LGALS3BP PE=1 SV=1	HUMAN	11
142	18.75	18.75	38.7	26.21	20.8	sp|Q14393|GAS6_HUMAN	Growth arrest-specific protein 6 OS=Homo sapiens GN=GAS6 PE=1 SV=2	HUMAN	11
143	18.73	18.73	39.39	34.2	28.79	sp|P68104|EF1A1_HUMAN	Elongation factor 1-alpha 1 OS=Homo sapiens GN=EEF1A1 PE=1 SV=1	HUMAN	13
143	0	16.65	34.42	29.22	23.81	sp|Q5VTE0|EF1A3_HUMAN	Putative elongation factor 1-alpha-like 3 OS=Homo sapiens GN=EEF1A1P5 PE=5 SV=1	HUMAN	11
144	18.65	20.86	49.49	40.91	34.34	sp|P32119|PRDX2_HUMAN	Peroxiredoxin-2 OS=Homo sapiens GN=PRDX2 PE=1 SV=5	HUMAN	13
145	18.58	18.58	46.69	37.29	35.64	sp|Q9BRK5|CAB45_HUMAN	45 kDa calcium-binding protein OS=Homo sapiens GN=SDF4 PE=1 SV=1	HUMAN	12
146	18.4	18.4	57.79	57.79	57.79	sp|P37802|TAGL2_HUMAN	Transgelin-2 OS=Homo sapiens GN=TAGLN2 PE=1 SV=3	HUMAN	17
146	0	16.3	54.01	54.01	54.01	tr|X6RJP6|X6RJP6_HUMAN	Transgelin-2 (Fragment) OS=Homo sapiens GN=TAGLN2 PE=1 SV=1	HUMAN	14
147	18.32	18.32	56.19	47.14	44.29	tr|Q5T9B7|Q5T9B7_HUMAN	Adenylate kinase isoenzyme 1 OS=Homo sapiens GN=AK1 PE=1 SV=1	HUMAN	13
147	0	18.32	55.15	51.03	47.94	sp|P00568|KAD1_HUMAN	Adenylate kinase isoenzyme 1 OS=Homo sapiens GN=AK1 PE=1 SV=3	HUMAN	13
148	18.09	18.09	47.34	44.38	39.94	sp|P40926|MDHM_HUMAN	Malate dehydrogenase, mitochondrial OS=Homo sapiens GN=MDH2 PE=1 SV=3	HUMAN	11
149	18.02	18.02	52.35	41.61	35.57	sp|P25311|ZA2G_HUMAN	Zinc-alpha-2-glycoprotein OS=Homo sapiens GN=AZGP1 PE=1 SV=2	HUMAN	12
150	17.99	17.99	46.86	36.14	26.9	sp|O75083|WDR1_HUMAN	WD repeat-containing protein 1 OS=Homo sapiens GN=WDR1 PE=1 SV=4	HUMAN	10
151	17.52	17.52	17.65	13.29	12.17	sp|P13497|BMP1_HUMAN	Bone morphogenetic protein 1 OS=Homo sapiens GN=BMP1 PE=1 SV=2	HUMAN	10
152	17.47	20.79	54.67	41.93	41.08	sp|P22626|ROA2_HUMAN	Heterogeneous nuclear ribonucleoproteins A2/B1 OS=Homo sapiens GN=HNRNPA2B1 PE=1 SV=2	HUMAN	18
153	17.43	17.43	40.83	33.13	29.79	sp|Q92743|HTRA1_HUMAN	Serine protease HTRA1 OS=Homo sapiens GN=HTRA1 PE=1 SV=1	HUMAN	11
154	17.4	17.4	30.43	15.59	10.91	sp|P19367|HXK1_HUMAN	Hexokinase-1 OS=Homo sapiens GN=HK1 PE=1 SV=3	HUMAN	9
155	17.04	17.04	17.67	15.91	11.72	sp|Q7Z7G0|TARSH_HUMAN	Target of Nesh-SH3 OS=Homo sapiens GN=ABI3BP PE=1 SV=1	HUMAN	8
155	0	16.91	12.16	9.623	7.091	tr|D3YTG3|D3YTG3_HUMAN	Target of Nesh-SH3 OS=Homo sapiens GN=ABI3BP PE=1 SV=1	HUMAN	8
156	17.03	17.04	64.88	60.49	60.49	sp|P04792|HSPB1_HUMAN	Heat shock protein beta-1 OS=Homo sapiens GN=HSPB1 PE=1 SV=2	HUMAN	11
157	16.76	78.41	38.47	27.08	23.16	sp|Q9Y623|MYH4_HUMAN	Myosin-4 OS=Homo sapiens GN=MYH4 PE=1 SV=2	HUMAN	41
158	16.51	16.53	30.62	27.41	25.14	sp|P06576|ATPB_HUMAN	ATP synthase subunit beta, mitochondrial OS=Homo sapiens GN=ATP5B PE=1 SV=3	HUMAN	9
159	16.47	16.47	17.95	8.815	7.477	sp|Q9Y490|TLN1_HUMAN	Talin-1 OS=Homo sapiens GN=TLN1 PE=1 SV=3	HUMAN	10
160	16.38	16.44	17.99	11.97	8.927	sp|Q6YHK3|CD109_HUMAN	CD109 antigen OS=Homo sapiens GN=CD109 PE=1 SV=2	HUMAN	9
161	16.38	16.38	39.51	31.09	21.91	sp|P13674|P4HA1_HUMAN	Prolyl 4-hydroxylase subunit alpha-1 OS=Homo sapiens GN=P4HA1 PE=1 SV=2	HUMAN	8
162	16.11	16.11	58.82	54.9	50	tr|E9PK25|E9PK25_HUMAN	Cofilin-1 OS=Homo sapiens GN=CFL1 PE=1 SV=1	HUMAN	10
162	0	16.11	72.29	67.47	61.45	sp|P23528|COF1_HUMAN	Cofilin-1 OS=Homo sapiens GN=CFL1 PE=1 SV=3	HUMAN	10
163	15.98	36.17	71.37	68.28	62.56	tr|A0A087WWU8|A0A087WWU8_HUMAN	Tropomyosin alpha-3 chain OS=Homo sapiens GN=TPM3 PE=1 SV=1	HUMAN	20
163	0	29.12	68.1	59.48	48.28	tr|Q5HYB6|Q5HYB6_HUMAN	Epididymis luminal protein 189 OS=Homo sapiens GN=DKFZp686J1372 PE=1 SV=1	HUMAN	16
163	0	24.49	66.37	57.4	51.57	tr|Q5VU61|Q5VU61_HUMAN	Tropomyosin alpha-3 chain OS=Homo sapiens GN=TPM3 PE=1 SV=2	HUMAN	15
164	15.89	15.89	15.11	12.55	9.239	sp|Q14766|LTBP1_HUMAN	Latent-transforming growth factor beta-binding protein 1 OS=Homo sapiens GN=LTBP1 PE=1 SV=4	HUMAN	10
164	0	15.88	17.81	15.96	11.75	tr|E7EV71|E7EV71_HUMAN	Latent-transforming growth factor beta-binding protein 1 OS=Homo sapiens GN=LTBP1 PE=1 SV=2	HUMAN	10
165	15.8	17.38	18.72	17.98	14.86	sp|Q6EMK4|VASN_HUMAN	Vasorin OS=Homo sapiens GN=VASN PE=1 SV=1	HUMAN	10
166	15.46	15.46	33.5	28.16	25.97	sp|P07339|CATD_HUMAN	Cathepsin D OS=Homo sapiens GN=CTSD PE=1 SV=1	HUMAN	10
167	15.34	15.34	16.09	10.07	5.805	sp|Q8WUJ3|CEMIP_HUMAN	Cell migration-inducing and hyaluronan-binding protein OS=Homo sapiens GN=CEMIP PE=1 SV=2	HUMAN	7
168	15.31	15.31	15.58	8.553	7.709	sp|Q4ZHG4|FNDC1_HUMAN	Fibronectin type III domain-containing protein 1 OS=Homo sapiens GN=FNDC1 PE=1 SV=4	HUMAN	10
168	0	14.96	14.69	8.436	7.542	tr|J3KNQ2|J3KNQ2_HUMAN	Fibronectin type III domain-containing protein 1 (Fragment) OS=Homo sapiens GN=FNDC1 PE=1 SV=1	HUMAN	9
169	14.88	14.88	30.63	27.79	18.86	sp|Q16658|FSCN1_HUMAN	Fascin OS=Homo sapiens GN=FSCN1 PE=1 SV=3	HUMAN	8
170	14.84	14.84	34.28	25.96	19.47	sp|Q12805|FBLN3_HUMAN	EGF-containing fibulin-like extracellular matrix protein 1 OS=Homo sapiens GN=EFEMP1 PE=1 SV=2	HUMAN	16
171	14.63	14.73	17.66	14.39	6.881	sp|P0C0L4|CO4A_HUMAN	Complement C4-A OS=Homo sapiens GN=C4A PE=1 SV=2	HUMAN	11
171	0	12.55	16.61	13.07	6.36	tr|F5GXS0|F5GXS0_HUMAN	Complement C4-B OS=Homo sapiens GN=C4B PE=1 SV=1	HUMAN	10
171	0	12.49	16.46	12.73	6.193	sp|P0C0L5|CO4B_HUMAN	Complement C4-B OS=Homo sapiens GN=C4B PE=1 SV=2	HUMAN	10
172	14.6	14.6	39.95	35.17	27.27	sp|P61158|ARP3_HUMAN	Actin-related protein 3 OS=Homo sapiens GN=ACTR3 PE=1 SV=3	HUMAN	8
172	0	14.6	41.96	36.51	31.06	tr|B4DXW1|B4DXW1_HUMAN	Actin-related protein 3 OS=Homo sapiens GN=ACTR3 PE=1 SV=1	HUMAN	8
173	14.57	14.57	15.11	8.692	7.555	sp|P08603|CFAH_HUMAN	Complement factor H OS=Homo sapiens GN=CFH PE=1 SV=4	HUMAN	10
174	14.55	14.55	20.75	17.97	16.99	sp|Q93063|EXT2_HUMAN	Exostosin-2 OS=Homo sapiens GN=EXT2 PE=1 SV=1	HUMAN	10
175	14.41	14.5	35.78	32.33	20.26	sp|P01008|ANT3_HUMAN	Antithrombin-III OS=Homo sapiens GN=SERPINC1 PE=1 SV=1	HUMAN	13
176	14.38	14.39	30.71	29.92	21.52	sp|P26022|PTX3_HUMAN	Pentraxin-related protein PTX3 OS=Homo sapiens GN=PTX3 PE=1 SV=3	HUMAN	8
177	14.38	14.38	31.34	28.35	21.13	sp|Q8TB73|NDNF_HUMAN	Protein NDNF OS=Homo sapiens GN=NDNF PE=2 SV=2	HUMAN	8
178	14.24	14.24	34.55	31.36	24.55	sp|P16035|TIMP2_HUMAN	Metalloproteinase inhibitor 2 OS=Homo sapiens GN=TIMP2 PE=1 SV=2	HUMAN	12
179	14.21	21.6	31.51	28.71	25.9	sp|P08107|HSP71_HUMAN	Heat shock 70 kDa protein 1A/1B OS=Homo sapiens GN=HSPA1A PE=1 SV=5	HUMAN	15
180	14.12	17.8	58.94	53.66	44.72	sp|P31946|1433B_HUMAN	14-3-3 protein beta/alpha OS=Homo sapiens GN=YWHAB PE=1 SV=3	HUMAN	11
181	14.09	14.09	21.38	17.78	12.09	sp|O14983|AT2A1_HUMAN	Sarcoplasmic/endoplasmic reticulum calcium ATPase 1 OS=Homo sapiens GN=ATP2A1 PE=1 SV=1	HUMAN	9
182	14.08	14.13	44.16	34.7	31.55	sp|P05388|RLA0_HUMAN	60S acidic ribosomal protein P0 OS=Homo sapiens GN=RPLP0 PE=1 SV=1	HUMAN	7
182	0	12.02	45.2	34.52	30.96	tr|F8VWS0|F8VWS0_HUMAN	60S acidic ribosomal protein P0 OS=Homo sapiens GN=RPLP0 PE=1 SV=1	HUMAN	6
183	14.03	16.13	23.86	16.37	13.31	tr|F5H4Z8|F5H4Z8_HUMAN	Thrombospondin-3 OS=Homo sapiens GN=THBS3 PE=1 SV=2	HUMAN	10
183	0	16.13	23.64	16.21	13.18	sp|P49746|TSP3_HUMAN	Thrombospondin-3 OS=Homo sapiens GN=THBS3 PE=1 SV=1	HUMAN	10
184	13.63	13.63	35.88	31.92	25.99	sp|P10915|HPLN1_HUMAN	Hyaluronan and proteoglycan link protein 1 OS=Homo sapiens GN=HAPLN1 PE=2 SV=2	HUMAN	9
185	13.49	13.49	50.19	49.81	36.33	sp|P01210|PENK_HUMAN	Proenkephalin-A OS=Homo sapiens GN=PENK PE=1 SV=1	HUMAN	10
186	13.34	13.38	20.37	13.48	9.287	sp|P02462|CO4A1_HUMAN	Collagen alpha-1(IV) chain OS=Homo sapiens GN=COL4A1 PE=1 SV=3	HUMAN	15
187	13.31	14.17	42.45	32.85	32.85	sp|P28300|LYOX_HUMAN	Protein-lysine 6-oxidase OS=Homo sapiens GN=LOX PE=1 SV=2	HUMAN	12
188	13.26	13.26	62.33	51.71	45.21	tr|Q32Q12|Q32Q12_HUMAN	Nucleoside diphosphate kinase OS=Homo sapiens GN=NME1-NME2 PE=1 SV=1	HUMAN	10
188	0	11.1	75.66	67.76	55.92	sp|P22392|NDKB_HUMAN	Nucleoside diphosphate kinase B OS=Homo sapiens GN=NME2 PE=1 SV=1	HUMAN	9
189	13.02	13.02	24.96	19.37	15.53	sp|P10809|CH60_HUMAN	60 kDa heat shock protein, mitochondrial OS=Homo sapiens GN=HSPD1 PE=1 SV=2	HUMAN	10
190	12.81	12.84	33.2	19.76	18.82	sp|P27658|CO8A1_HUMAN	Collagen alpha-1(VIII) chain OS=Homo sapiens GN=COL8A1 PE=1 SV=2	HUMAN	8
191	12.74	12.74	34.49	30.09	26.16	sp|Q8NBS9|TXND5_HUMAN	Thioredoxin domain-containing protein 5 OS=Homo sapiens GN=TXNDC5 PE=1 SV=2	HUMAN	9
192	12.61	12.66	9.138	6.984	5.418	sp|P35573|GDE_HUMAN	Glycogen debranching enzyme OS=Homo sapiens GN=AGL PE=1 SV=3	HUMAN	7
193	12.58	12.58	41.21	35.68	24.62	sp|P15291|B4GT1_HUMAN	Beta-1,4-galactosyltransferase 1 OS=Homo sapiens GN=B4GALT1 PE=1 SV=5	HUMAN	8
194	12.55	12.55	33.97	25.61	18.64	sp|P21589|5NTD_HUMAN	5'-nucleotidase OS=Homo sapiens GN=NT5E PE=1 SV=1	HUMAN	7
195	12.48	14.25	37.31	28.93	26.9	sp|P61160|ARP2_HUMAN	Actin-related protein 2 OS=Homo sapiens GN=ACTR2 PE=1 SV=1	HUMAN	13
196	12.43	12.43	34.59	28.65	21.35	sp|Q9Y617|SERC_HUMAN	Phosphoserine aminotransferase OS=Homo sapiens GN=PSAT1 PE=1 SV=2	HUMAN	7
197	12.41	12.41	63.37	44.03	34.98	sp|P23396|RS3_HUMAN	40S ribosomal protein S3 OS=Homo sapiens GN=RPS3 PE=1 SV=2	HUMAN	7
197	0	12.33	78.48	62.66	53.8	tr|E9PPU1|E9PPU1_HUMAN	40S ribosomal protein S3 OS=Homo sapiens GN=RPS3 PE=1 SV=1	HUMAN	7
197	0	10.18	60.61	40.26	30.74	tr|E9PL09|E9PL09_HUMAN	40S ribosomal protein S3 OS=Homo sapiens GN=RPS3 PE=1 SV=1	HUMAN	6
198	12.39	12.41	47.53	34.6	28.14	sp|P28074|PSB5_HUMAN	Proteasome subunit beta type-5 OS=Homo sapiens GN=PSMB5 PE=1 SV=3	HUMAN	7
199	12.23	13.05	20.66	17.81	16.52	sp|Q04446|GLGB_HUMAN	1,4-alpha-glucan-branching enzyme OS=Homo sapiens GN=GBE1 PE=1 SV=3	HUMAN	9
200	12.23	12.23	23.39	14.54	11.26	tr|E9PLK3|E9PLK3_HUMAN	Puromycin-sensitive aminopeptidase OS=Homo sapiens GN=NPEPPS PE=1 SV=1	HUMAN	8
200	0	12.23	23.29	14.47	11.21	sp|P55786|PSA_HUMAN	Puromycin-sensitive aminopeptidase OS=Homo sapiens GN=NPEPPS PE=1 SV=2	HUMAN	8
201	12.22	12.23	19.52	13.41	11.55	sp|P58215|LOXL3_HUMAN	Lysyl oxidase homolog 3 OS=Homo sapiens GN=LOXL3 PE=2 SV=1	HUMAN	7
201	0	10.14	19.37	12.77	10.76	tr|E7END4|E7END4_HUMAN	Lysyl oxidase homolog 3 OS=Homo sapiens GN=LOXL3 PE=1 SV=1	HUMAN	6
202	12.21	32.93	34.81	30.39	27.07	sp|P08238|HS90B_HUMAN	Heat shock protein HSP 90-beta OS=Homo sapiens GN=HSP90AB1 PE=1 SV=4	HUMAN	20
203	12.21	12.26	43.03	43.03	35.15	sp|P62937|PPIA_HUMAN	Peptidyl-prolyl cis-trans isomerase A OS=Homo sapiens GN=PPIA PE=1 SV=2	HUMAN	9
204	12.16	41.49	66.84	66.84	59.15	sp|P68133|ACTS_HUMAN	Actin, alpha skeletal muscle OS=Homo sapiens GN=ACTA1 PE=1 SV=1	HUMAN	39
205	12.16	12.16	28.02	20.5	16.4	sp|Q08629|TICN1_HUMAN	Testican-1 OS=Homo sapiens GN=SPOCK1 PE=1 SV=1	HUMAN	6
206	12.15	12.16	51.04	44.4	38.59	sp|O00299|CLIC1_HUMAN	Chloride intracellular channel protein 1 OS=Homo sapiens GN=CLIC1 PE=1 SV=4	HUMAN	8
207	12.15	12.15	32.42	31.82	29.7	tr|A0A087WZH7|A0A087WZH7_HUMAN	Myristoylated alanine-rich C-kinase substrate OS=Homo sapiens GN=MARCKS PE=1 SV=1	HUMAN	6
207	0	12.15	32.23	31.63	29.52	sp|P29966|MARCS_HUMAN	Myristoylated alanine-rich C-kinase substrate OS=Homo sapiens GN=MARCKS PE=1 SV=4	HUMAN	6
208	12.08	12.08	19.57	14.4	13.18	tr|F5H365|F5H365_HUMAN	Protein transport protein Sec23A OS=Homo sapiens GN=SEC23A PE=1 SV=1	HUMAN	7
208	0	12.08	18.82	13.86	12.68	sp|Q15436|SC23A_HUMAN	Protein transport protein Sec23A OS=Homo sapiens GN=SEC23A PE=1 SV=2	HUMAN	7
209	11.68	11.68	24.22	17.59	12.99	sp|P41250|SYG_HUMAN	Glycine--tRNA ligase OS=Homo sapiens GN=GARS PE=1 SV=3	HUMAN	7
210	11.57	11.61	33.57	26.57	17.66	sp|Q16555|DPYL2_HUMAN	Dihydropyrimidinase-related protein 2 OS=Homo sapiens GN=DPYSL2 PE=1 SV=1	HUMAN	7
211	11.51	12.27	21.94	20.46	19.41	sp|Q9ULV4|COR1C_HUMAN	Coronin-1C OS=Homo sapiens GN=CORO1C PE=1 SV=1	HUMAN	9
211	0	10.45	26.02	24.12	22.76	tr|B4E3S0|B4E3S0_HUMAN	Coronin OS=Homo sapiens GN=CORO1C PE=1 SV=1	HUMAN	8
212	11.5	11.5	15.53	10.73	10.73	sp|Q14974|IMB1_HUMAN	Importin subunit beta-1 OS=Homo sapiens GN=KPNB1 PE=1 SV=2	HUMAN	7
213	11.45	11.45	18.62	11.91	8.936	sp|Q7Z7M9|GALT5_HUMAN	Polypeptide N-acetylgalactosaminyltransferase 5 OS=Homo sapiens GN=GALNT5 PE=1 SV=1	HUMAN	7
214	11.35	11.35	24.61	19.03	8.997	sp|P15144|AMPN_HUMAN	Aminopeptidase N OS=Homo sapiens GN=ANPEP PE=1 SV=4	HUMAN	7
215	11.34	11.71	66.01	49.41	47.04	sp|Q9Y696|CLIC4_HUMAN	Chloride intracellular channel protein 4 OS=Homo sapiens GN=CLIC4 PE=1 SV=4	HUMAN	10
216	11.34	11.34	36.02	22.77	16.56	sp|P52209|6PGD_HUMAN	6-phosphogluconate dehydrogenase, decarboxylating OS=Homo sapiens GN=PGD PE=1 SV=3	HUMAN	7
216	0	9.7	58.54	47.8	33.17	tr|K7EM49|K7EM49_HUMAN	6-phosphogluconate dehydrogenase, decarboxylating (Fragment) OS=Homo sapiens GN=PGD PE=1 SV=1	HUMAN	6
216	0	9.7	61.87	48.12	42.5	tr|K7EMN2|K7EMN2_HUMAN	6-phosphogluconate dehydrogenase, decarboxylating (Fragment) OS=Homo sapiens GN=PGD PE=1 SV=1	HUMAN	6
217	11.3	11.3	24.15	15.06	13.92	tr|Q5T7F0|Q5T7F0_HUMAN	Neuropilin-1 OS=Homo sapiens GN=NRP1 PE=1 SV=1	HUMAN	6
217	0	11.3	18.76	11.7	10.82	tr|E9PEP6|E9PEP6_HUMAN	Neuropilin-1 OS=Homo sapiens GN=NRP1 PE=1 SV=2	HUMAN	6
217	0	11.3	26.52	16.54	15.29	tr|E7EX60|E7EX60_HUMAN	Neuropilin-1 OS=Homo sapiens GN=NRP1 PE=1 SV=1	HUMAN	6
217	0	11.3	18.42	11.48	10.62	sp|O14786|NRP1_HUMAN	Neuropilin-1 OS=Homo sapiens GN=NRP1 PE=1 SV=3	HUMAN	6
217	0	9.23	26.13	15.41	14.07	tr|Q5JWQ4|Q5JWQ4_HUMAN	Neuropilin-1 OS=Homo sapiens GN=NRP1 PE=1 SV=2	HUMAN	5
218	11.27	11.27	40.42	31.44	25.15	sp|P40925|MDHC_HUMAN	Malate dehydrogenase, cytoplasmic OS=Homo sapiens GN=MDH1 PE=1 SV=4	HUMAN	8
219	11.23	11.23	42.79	26.05	22.79	tr|C9JF17|C9JF17_HUMAN	Apolipoprotein D (Fragment) OS=Homo sapiens GN=APOD PE=1 SV=1	HUMAN	7
219	0	11.23	48.68	29.63	25.93	sp|P05090|APOD_HUMAN	Apolipoprotein D OS=Homo sapiens GN=APOD PE=1 SV=1	HUMAN	7
220	11.2	11.2	14.65	10.53	10.53	sp|P23142|FBLN1_HUMAN	Fibulin-1 OS=Homo sapiens GN=FBLN1 PE=1 SV=4	HUMAN	9
221	11.13	11.15	24.52	21.72	17.2	sp|O60687|SRPX2_HUMAN	Sushi repeat-containing protein SRPX2 OS=Homo sapiens GN=SRPX2 PE=1 SV=1	HUMAN	7
222	10.77	23.81	37.37	30.1	24.91	sp|Q7Z794|K2C1B_HUMAN	Keratin, type II cytoskeletal 1b OS=Homo sapiens GN=KRT77 PE=2 SV=3	HUMAN	17
223	10.71	10.72	24.96	14.41	12.18	sp|P08133|ANXA6_HUMAN	Annexin A6 OS=Homo sapiens GN=ANXA6 PE=1 SV=3	HUMAN	6
223	0	9.11	23.91	14.57	14.57	tr|E5RK69|E5RK69_HUMAN	Annexin OS=Homo sapiens GN=ANXA6 PE=1 SV=1	HUMAN	5
224	10.69	10.69	22.38	11.55	6.905	sp|P34932|HSP74_HUMAN	Heat shock 70 kDa protein 4 OS=Homo sapiens GN=HSPA4 PE=1 SV=4	HUMAN	5
224	0	10.24	19.31	10.3	8.298	tr|A0A087WYC1|A0A087WYC1_HUMAN	Heat shock 70 kDa protein 4 OS=Homo sapiens GN=HSPA4 PE=1 SV=1	HUMAN	5
224	0	10.24	20.21	15.16	12.21	tr|A0A087WTS8|A0A087WTS8_HUMAN	Heat shock 70 kDa protein 4 OS=Homo sapiens GN=HSPA4 PE=1 SV=1	HUMAN	5
225	10.63	10.63	49.11	45.98	31.25	sp|P30041|PRDX6_HUMAN	Peroxiredoxin-6 OS=Homo sapiens GN=PRDX6 PE=1 SV=3	HUMAN	7
226	10.59	10.59	27.18	27.18	25.17	sp|Q96CN7|ISOC1_HUMAN	Isochorismatase domain-containing protein 1 OS=Homo sapiens GN=ISOC1 PE=1 SV=3	HUMAN	6
227	10.54	10.55	32.14	24.68	22.4	sp|Q12841|FSTL1_HUMAN	Follistatin-related protein 1 OS=Homo sapiens GN=FSTL1 PE=1 SV=1	HUMAN	10
228	10.53	10.54	16.35	14.71	10.35	sp|P02765|FETUA_HUMAN	Alpha-2-HS-glycoprotein OS=Homo sapiens GN=AHSG PE=1 SV=1	HUMAN	13
229	10.44	41.38	73.61	55.79	40.74	sp|Q04695|K1C17_HUMAN	Keratin, type I cytoskeletal 17 OS=Homo sapiens GN=KRT17 PE=1 SV=2	HUMAN	24
230	10.4	10.4	30.79	20.22	20.22	sp|Q96QA5|GSDMA_HUMAN	Gasdermin-A OS=Homo sapiens GN=GSDMA PE=1 SV=4	HUMAN	7
230	0	10.38	70.89	56.96	56.96	tr|J3KRG2|J3KRG2_HUMAN	Gasdermin-A (Fragment) OS=Homo sapiens GN=GSDMA PE=1 SV=4	HUMAN	7
231	10.35	10.35	14.87	10.3	9.342	sp|Q02413|DSG1_HUMAN	Desmoglein-1 OS=Homo sapiens GN=DSG1 PE=1 SV=2	HUMAN	8
232	10.3	35.1	40.82	30.53	27.62	sp|P35241|RADI_HUMAN	Radixin OS=Homo sapiens GN=RDX PE=1 SV=1	HUMAN	24
233	10.15	10.15	12.43	6.916	6.262	sp|Q13308|PTK7_HUMAN	Inactive tyrosine-protein kinase 7 OS=Homo sapiens GN=PTK7 PE=1 SV=2	HUMAN	5
234	10.07	10.07	38.66	28.87	28.87	sp|P05976|MYL1_HUMAN	Myosin light chain 1/3, skeletal muscle isoform OS=Homo sapiens GN=MYL1 PE=1 SV=3	HUMAN	7
235	10.05	10.05	59.29	59.29	50.71	sp|P07737|PROF1_HUMAN	Profilin-1 OS=Homo sapiens GN=PFN1 PE=1 SV=2	HUMAN	8
236	10	290.93	92.84	86.04	84.77	tr|H0Y7Z1|H0Y7Z1_HUMAN	Fibronectin (Fragment) OS=Homo sapiens GN=FN1 PE=1 SV=1	HUMAN	436
237	9.94	9.94	15.43	9.904	6.223	sp|Q14324|MYPC2_HUMAN	Myosin-binding protein C, fast-type OS=Homo sapiens GN=MYBPC2 PE=1 SV=2	HUMAN	6
238	9.85	9.85	49.19	40.32	25.4	sp|O14818|PSA7_HUMAN	Proteasome subunit alpha type-7 OS=Homo sapiens GN=PSMA7 PE=1 SV=1	HUMAN	5
239	9.79	9.79	51.62	38.27	34.3	sp|P16152|CBR1_HUMAN	Carbonyl reductase [NADPH] 1 OS=Homo sapiens GN=CBR1 PE=1 SV=3	HUMAN	7
240	9.77	9.77	46.84	33.22	24.92	tr|B1AK88|B1AK88_HUMAN	Capping protein (Actin filament) muscle Z-line, beta, isoform CRA_d OS=Homo sapiens GN=CAPZB PE=1 SV=1	HUMAN	8
240	0	9.77	46.15	38.46	28.85	tr|B1AK87|B1AK87_HUMAN	Capping protein (Actin filament) muscle Z-line, beta, isoform CRA_a OS=Homo sapiens GN=CAPZB PE=1 SV=1	HUMAN	8
240	0	8.47	44.77	27.8	24.19	sp|P47756|CAPZB_HUMAN	F-actin-capping protein subunit beta OS=Homo sapiens GN=CAPZB PE=1 SV=4	HUMAN	7
241	9.75	9.75	63.1	56.15	50.8	sp|P30086|PEBP1_HUMAN	Phosphatidylethanolamine-binding protein 1 OS=Homo sapiens GN=PEBP1 PE=1 SV=3	HUMAN	6
242	9.72	9.75	38.44	34.35	27.55	sp|P06748|NPM_HUMAN	Nucleophosmin OS=Homo sapiens GN=NPM1 PE=1 SV=2	HUMAN	9
243	9.69	9.69	52.38	52.38	52.38	sp|P09211|GSTP1_HUMAN	Glutathione S-transferase P OS=Homo sapiens GN=GSTP1 PE=1 SV=2	HUMAN	8
244	9.58	28	50	43.85	37.69	sp|P48594|SPB4_HUMAN	Serpin B4 OS=Homo sapiens GN=SERPINB4 PE=1 SV=2	HUMAN	18
244	0	25.8	47.17	41.78	35.31	tr|H0Y5H9|H0Y5H9_HUMAN	Serpin B4 (Fragment) OS=Homo sapiens GN=SERPINB4 PE=1 SV=1	HUMAN	17
245	9.5	9.5	38.98	22.05	16.48	sp|P10909|CLUS_HUMAN	Clusterin OS=Homo sapiens GN=CLU PE=1 SV=1	HUMAN	5
246	9.46	9.46	19.93	15.29	9.622	sp|Q96AY3|FKB10_HUMAN	Peptidyl-prolyl cis-trans isomerase FKBP10 OS=Homo sapiens GN=FKBP10 PE=1 SV=1	HUMAN	6
247	9.44	9.44	14.81	10.19	7.609	sp|Q32P28|P3H1_HUMAN	Prolyl 3-hydroxylase 1 OS=Homo sapiens GN=LEPRE1 PE=1 SV=2	HUMAN	5
248	9.42	9.42	14.33	9.733	7.807	tr|Q5T985|Q5T985_HUMAN	Inter-alpha-trypsin inhibitor heavy chain H2 OS=Homo sapiens GN=ITIH2 PE=1 SV=1	HUMAN	7
248	0	9.42	14.18	9.63	7.725	tr|A0A087WTE1|A0A087WTE1_HUMAN	Inter-alpha-trypsin inhibitor heavy chain H2 OS=Homo sapiens GN=ITIH2 PE=1 SV=1	HUMAN	7
248	0	9.42	14.16	9.619	7.717	sp|P19823|ITIH2_HUMAN	Inter-alpha-trypsin inhibitor heavy chain H2 OS=Homo sapiens GN=ITIH2 PE=1 SV=2	HUMAN	7
249	9.37	9.37	21.72	13.54	10.19	sp|Q16394|EXT1_HUMAN	Exostosin-1 OS=Homo sapiens GN=EXT1 PE=1 SV=2	HUMAN	6
250	9.36	9.36	50.49	44.61	44.61	sp|P52565|GDIR1_HUMAN	Rho GDP-dissociation inhibitor 1 OS=Homo sapiens GN=ARHGDIA PE=1 SV=3	HUMAN	8
250	0	9.03	41.7	36.6	36.6	tr|J3QQX2|J3QQX2_HUMAN	Rho GDP-dissociation inhibitor 1 OS=Homo sapiens GN=ARHGDIA PE=1 SV=1	HUMAN	7
250	0	9.03	50.78	44.56	44.56	tr|J3KTF8|J3KTF8_HUMAN	Rho GDP-dissociation inhibitor 1 (Fragment) OS=Homo sapiens GN=ARHGDIA PE=1 SV=4	HUMAN	7
250	0	7.6	70.54	68.22	68.22	tr|J3KRE2|J3KRE2_HUMAN	Rho GDP-dissociation inhibitor 1 OS=Homo sapiens GN=ARHGDIA PE=1 SV=1	HUMAN	7
251	9.35	9.35	33.54	30.75	20.19	sp|P05089|ARGI1_HUMAN	Arginase-1 OS=Homo sapiens GN=ARG1 PE=1 SV=2	HUMAN	5
252	9.28	9.28	22.11	15.79	12.21	sp|Q96KP4|CNDP2_HUMAN	Cytosolic non-specific dipeptidase OS=Homo sapiens GN=CNDP2 PE=1 SV=2	HUMAN	5
253	9.22	13.17	50.81	40.65	31.71	sp|Q04917|1433F_HUMAN	14-3-3 protein eta OS=Homo sapiens GN=YWHAH PE=1 SV=4	HUMAN	7
254	9.22	9.23	20.27	12.96	11.13	sp|Q07065|CKAP4_HUMAN	Cytoskeleton-associated protein 4 OS=Homo sapiens GN=CKAP4 PE=1 SV=2	HUMAN	5
255	9.03	9.03	36.54	20.83	10.41	sp|P12081|SYHC_HUMAN	Histidine--tRNA ligase, cytoplasmic OS=Homo sapiens GN=HARS PE=1 SV=2	HUMAN	4
255	0	8.14	38.99	22.03	13.42	tr|B4E1C5|B4E1C5_HUMAN	Histidine--tRNA ligase, cytoplasmic OS=Homo sapiens GN=HARS PE=1 SV=1	HUMAN	4
255	0	8.14	35.4	20	12.18	tr|B4DDD8|B4DDD8_HUMAN	Histidine--tRNA ligase, cytoplasmic OS=Homo sapiens GN=HARS PE=1 SV=1	HUMAN	4
255	0	7.78	41.32	24.31	18.4	tr|E7ETE2|E7ETE2_HUMAN	Histidine--tRNA ligase, cytoplasmic (Fragment) OS=Homo sapiens GN=HARS PE=1 SV=1	HUMAN	4
256	8.94	8.94	14.86	11.66	10.47	sp|P27824|CALX_HUMAN	Calnexin OS=Homo sapiens GN=CANX PE=1 SV=2	HUMAN	5
257	8.93	8.93	29.84	20.63	13.65	tr|D3DQH8|D3DQH8_HUMAN	SPARC OS=Homo sapiens GN=SPARC PE=1 SV=1	HUMAN	6
257	0	8.93	31.02	21.45	14.19	sp|P09486|SPRC_HUMAN	SPARC OS=Homo sapiens GN=SPARC PE=1 SV=1	HUMAN	6
257	0	7.59	36.91	36.91	22.15	tr|F5GY03|F5GY03_HUMAN	SPARC (Fragment) OS=Homo sapiens GN=SPARC PE=1 SV=1	HUMAN	4
258	8.88	8.88	56.16	50.68	32.19	sp|P62249|RS16_HUMAN	40S ribosomal protein S16 OS=Homo sapiens GN=RPS16 PE=1 SV=2	HUMAN	6
258	0	8.22	56.59	48.06	27.13	tr|M0R210|M0R210_HUMAN	40S ribosomal protein S16 OS=Homo sapiens GN=RPS16 PE=1 SV=1	HUMAN	5
258	0	8.07	55.48	34.25	23.97	tr|A0A087WZ27|A0A087WZ27_HUMAN	Zinc finger protein 90 OS=Homo sapiens GN=ZNF90 PE=4 SV=1	HUMAN	5
259	8.71	8.8	17.44	10.57	8.722	sp|P55884|EIF3B_HUMAN	Eukaryotic translation initiation factor 3 subunit B OS=Homo sapiens GN=EIF3B PE=1 SV=3	HUMAN	5
260	8.63	8.63	39.61	30.98	26.27	sp|P25788|PSA3_HUMAN	Proteasome subunit alpha type-3 OS=Homo sapiens GN=PSMA3 PE=1 SV=2	HUMAN	5
261	8.61	8.61	32.71	21.81	15.89	tr|B5MCX3|B5MCX3_HUMAN	Septin-2 OS=Homo sapiens GN=SEPT2 PE=1 SV=1	HUMAN	4
261	0	8.61	29.09	19.39	14.13	sp|Q15019|SEPT2_HUMAN	Septin-2 OS=Homo sapiens GN=SEPT2 PE=1 SV=1	HUMAN	4
261	0	8.08	40.76	27.72	27.72	tr|C9J2Q4|C9J2Q4_HUMAN	Septin-2 (Fragment) OS=Homo sapiens GN=SEPT2 PE=1 SV=1	HUMAN	4
262	8.53	9.26	18.22	16.12	16.12	sp|O14498|ISLR_HUMAN	Immunoglobulin superfamily containing leucine-rich repeat protein OS=Homo sapiens GN=ISLR PE=1 SV=1	HUMAN	7
262	0	7.2	38.1	38.1	38.1	tr|H0YN67|H0YN67_HUMAN	Immunoglobulin superfamily-containing leucine-rich repeat protein (Fragment) OS=Homo sapiens GN=ISLR PE=1 SV=1	HUMAN	6
262	0	7.2	30.6	30.6	30.6	tr|H0YL90|H0YL90_HUMAN	Immunoglobulin superfamily-containing leucine-rich repeat protein (Fragment) OS=Homo sapiens GN=ISLR PE=1 SV=1	HUMAN	6
263	8.53	8.54	24.15	13.89	11.32	sp|Q96HE7|ERO1A_HUMAN	ERO1-like protein alpha OS=Homo sapiens GN=ERO1L PE=1 SV=2	HUMAN	4
264	8.52	8.53	33.33	29.31	26.44	sp|P40121|CAPG_HUMAN	Macrophage-capping protein OS=Homo sapiens GN=CAPG PE=1 SV=2	HUMAN	8
265	8.43	8.43	37.15	22.14	19.59	sp|Q9BWS9|CHID1_HUMAN	Chitinase domain-containing protein 1 OS=Homo sapiens GN=CHID1 PE=1 SV=1	HUMAN	7
266	8.39	8.39	25.74	13.54	8.579	sp|Q96TA1|NIBL1_HUMAN	Niban-like protein 1 OS=Homo sapiens GN=FAM129B PE=1 SV=3	HUMAN	4
267	8.34	10.11	18.41	8.389	4.526	sp|P46940|IQGA1_HUMAN	Ras GTPase-activating-like protein IQGAP1 OS=Homo sapiens GN=IQGAP1 PE=1 SV=1	HUMAN	6
268	8.1	8.1	34.25	34.25	29.83	tr|F8WCF6|F8WCF6_HUMAN	Protein ARPC4-TTLL3 OS=Homo sapiens GN=ARPC4-TTLL3 PE=1 SV=1	HUMAN	6
268	0	8.1	36.9	36.9	32.14	sp|P59998|ARPC4_HUMAN	Actin-related protein 2/3 complex subunit 4 OS=Homo sapiens GN=ARPC4 PE=1 SV=3	HUMAN	6
268	0	8.05	12.16	8.64	8.64	tr|A0A0A6YYG9|A0A0A6YYG9_HUMAN	Protein ARPC4-TTLL3 OS=Homo sapiens GN=ARPC4-TTLL3 PE=1 SV=1	HUMAN	6
268	0	8.02	47.79	47.79	47.79	tr|F8WDD7|F8WDD7_HUMAN	Actin-related protein 2/3 complex subunit 4 OS=Homo sapiens GN=ARPC4 PE=1 SV=1	HUMAN	6
268	0	7.36	32.34	32.34	27.54	tr|H7C0A3|H7C0A3_HUMAN	Protein ARPC4-TTLL3 (Fragment) OS=Homo sapiens GN=ARPC4-TTLL3 PE=1 SV=1	HUMAN	5
269	8.05	8.05	31.97	20.77	17.76	sp|P30508|1C12_HUMAN	HLA class I histocompatibility antigen, Cw-12 alpha chain OS=Homo sapiens GN=HLA-C PE=1 SV=2	HUMAN	5
269	0	8.05	26.5	20.77	17.76	sp|Q07000|1C15_HUMAN	HLA class I histocompatibility antigen, Cw-15 alpha chain OS=Homo sapiens GN=HLA-C PE=1 SV=1	HUMAN	5
269	0	8.05	28.14	20.77	17.76	sp|P30510|1C14_HUMAN	HLA class I histocompatibility antigen, Cw-14 alpha chain OS=Homo sapiens GN=HLA-C PE=1 SV=2	HUMAN	5
269	0	8.05	22.68	20.77	17.76	sp|P30504|1C04_HUMAN	HLA class I histocompatibility antigen, Cw-4 alpha chain OS=Homo sapiens GN=HLA-C PE=1 SV=1	HUMAN	5
269	0	8	28.96	17.76	17.76	sp|P30501|1C02_HUMAN	HLA class I histocompatibility antigen, Cw-2 alpha chain OS=Homo sapiens GN=HLA-C PE=1 SV=1	HUMAN	5
269	0	8	21.58	17.76	17.76	sp|P04222|1C03_HUMAN	HLA class I histocompatibility antigen, Cw-3 alpha chain OS=Homo sapiens GN=HLA-C PE=1 SV=2	HUMAN	5
269	0	7.2	25.48	21.1	16.44	sp|P30447|1A23_HUMAN	HLA class I histocompatibility antigen, A-23 alpha chain OS=Homo sapiens GN=HLA-A PE=1 SV=1	HUMAN	5
269	0	7.2	39.46	26.09	20.07	tr|Q5SRN7|Q5SRN7_HUMAN	HLA class I histocompatibility antigen, A-68 alpha chain OS=Homo sapiens GN=HLA-A PE=1 SV=2	HUMAN	5
269	0	7.2	31.81	21.02	16.17	tr|Q5SRN5|Q5SRN5_HUMAN	HLA class I histocompatibility antigen, A-68 alpha chain OS=Homo sapiens GN=HLA-A PE=1 SV=2	HUMAN	5
269	0	7.2	33.15	21.91	16.85	tr|A7MAP4|A7MAP4_HUMAN	HLA class I histocompatibility antigen, A-68 alpha chain OS=Homo sapiens GN=HLA-A PE=1 SV=1	HUMAN	5
269	0	7.2	32.33	21.37	16.44	sp|P04439|1A03_HUMAN	HLA class I histocompatibility antigen, A-3 alpha chain OS=Homo sapiens GN=HLA-A PE=1 SV=2	HUMAN	5
269	0	7.2	21.37	21.37	16.44	sp|P16188|1A30_HUMAN	HLA class I histocompatibility antigen, A-30 alpha chain OS=Homo sapiens GN=HLA-A PE=1 SV=2	HUMAN	5
269	0	7.01	22.47	19.45	16.44	sp|P05534|1A24_HUMAN	HLA class I histocompatibility antigen, A-24 alpha chain OS=Homo sapiens GN=HLA-A PE=1 SV=2	HUMAN	5
269	0	6.63	34.25	21.55	11.33	sp|P30495|1B56_HUMAN	HLA class I histocompatibility antigen, B-56 alpha chain OS=Homo sapiens GN=HLA-B PE=1 SV=1	HUMAN	4
269	0	6.63	34.25	21.55	11.33	sp|P30492|1B54_HUMAN	HLA class I histocompatibility antigen, B-54 alpha chain OS=Homo sapiens GN=HLA-B PE=1 SV=1	HUMAN	4
269	0	6.63	34.81	21.55	11.33	sp|Q29940|1B59_HUMAN	HLA class I histocompatibility antigen, B-59 alpha chain OS=Homo sapiens GN=HLA-B PE=1 SV=1	HUMAN	4
269	0	6.63	31.49	21.55	11.33	sp|P30685|1B35_HUMAN	HLA class I histocompatibility antigen, B-35 alpha chain OS=Homo sapiens GN=HLA-B PE=1 SV=1	HUMAN	4
269	0	6.63	31.49	21.55	11.33	sp|P30491|1B53_HUMAN	HLA class I histocompatibility antigen, B-53 alpha chain OS=Homo sapiens GN=HLA-B PE=1 SV=1	HUMAN	4
269	0	6.63	31.49	21.55	11.33	sp|P10319|1B58_HUMAN	HLA class I histocompatibility antigen, B-58 alpha chain OS=Homo sapiens GN=HLA-B PE=1 SV=1	HUMAN	4
269	0	6.63	26.8	21.55	11.33	sp|P18465|1B57_HUMAN	HLA class I histocompatibility antigen, B-57 alpha chain OS=Homo sapiens GN=HLA-B PE=1 SV=1	HUMAN	4
269	0	6.45	31.22	19.89	11.33	sp|P30493|1B55_HUMAN	HLA class I histocompatibility antigen, B-55 alpha chain OS=Homo sapiens GN=HLA-B PE=1 SV=1	HUMAN	4
269	0	6.45	23.76	19.89	11.33	sp|P30484|1B46_HUMAN	HLA class I histocompatibility antigen, B-46 alpha chain OS=Homo sapiens GN=HLA-B PE=1 SV=1	HUMAN	4
269	0	6.45	23.76	19.89	11.33	sp|P30464|1B15_HUMAN	HLA class I histocompatibility antigen, B-15 alpha chain OS=Homo sapiens GN=HLA-B PE=1 SV=2	HUMAN	4
269	0	6.05	28.14	16.94	13.93	sp|Q29963|1C06_HUMAN	HLA class I histocompatibility antigen, Cw-6 alpha chain OS=Homo sapiens GN=HLA-C PE=1 SV=2	HUMAN	4
269	0	6.05	22.68	16.94	13.93	sp|Q29960|1C16_HUMAN	HLA class I histocompatibility antigen, Cw-16 alpha chain OS=Homo sapiens GN=HLA-C PE=1 SV=1	HUMAN	4
269	0	6.05	18.85	16.94	13.93	sp|Q29865|1C18_HUMAN	HLA class I histocompatibility antigen, Cw-18 alpha chain OS=Homo sapiens GN=HLA-C PE=1 SV=1	HUMAN	4
269	0	6.05	18.9	16.99	13.97	sp|P30455|1A36_HUMAN	HLA class I histocompatibility antigen, A-36 alpha chain OS=Homo sapiens GN=HLA-A PE=1 SV=1	HUMAN	4
269	0	6.05	18.9	16.99	13.97	sp|P30443|1A01_HUMAN	HLA class I histocompatibility antigen, A-1 alpha chain OS=Homo sapiens GN=HLA-A PE=1 SV=1	HUMAN	4
270	8.01	17.26	33.08	24.81	17.12	sp|Q8N1N4|K2C78_HUMAN	Keratin, type II cytoskeletal 78 OS=Homo sapiens GN=KRT78 PE=2 SV=2	HUMAN	11
271	7.99	9	30.24	23.57	18.81	tr|V9HW75|V9HW75_HUMAN	Epididymis secretory protein Li 109 OS=Homo sapiens GN=HEL-S-109 PE=1 SV=1	HUMAN	7
271	0	9	30.24	23.57	18.81	tr|A0A087WSV8|A0A087WSV8_HUMAN	Nucleobindin 2, isoform CRA_b OS=Homo sapiens GN=NUCB2 PE=1 SV=1	HUMAN	7
271	0	9	35.5	27.22	23.37	tr|E9PKG6|E9PKG6_HUMAN	Nucleobindin-2 OS=Homo sapiens GN=NUCB2 PE=1 SV=2	HUMAN	7
271	0	8.79	26.67	20	15.24	sp|P80303|NUCB2_HUMAN	Nucleobindin-2 OS=Homo sapiens GN=NUCB2 PE=1 SV=2	HUMAN	5
272	7.97	22.95	34.11	20.66	15.68	tr|A0A087WSZ2|A0A087WSZ2_HUMAN	Alpha-actinin-3 OS=Homo sapiens GN=ACTN3 PE=1 SV=1	HUMAN	16
272	0	25.08	34.52	22.75	17.54	sp|Q08043|ACTN3_HUMAN	Alpha-actinin-3 OS=Homo sapiens GN=ACTN3 PE=1 SV=2	HUMAN	17
273	7.96	7.97	43.16	40.6	29.06	sp|P25787|PSA2_HUMAN	Proteasome subunit alpha type-2 OS=Homo sapiens GN=PSMA2 PE=1 SV=2	HUMAN	5
274	7.88	7.88	25.17	25.17	25.17	sp|P52907|CAZA1_HUMAN	F-actin-capping protein subunit alpha-1 OS=Homo sapiens GN=CAPZA1 PE=1 SV=3	HUMAN	5
275	7.87	7.87	47.73	31.82	22.35	sp|P61247|RS3A_HUMAN	40S ribosomal protein S3a OS=Homo sapiens GN=RPS3A PE=1 SV=2	HUMAN	7
275	0	6.47	45.81	29.96	18.94	tr|D6RAT0|D6RAT0_HUMAN	40S ribosomal protein S3a OS=Homo sapiens GN=RPS3A PE=1 SV=1	HUMAN	5
275	0	5.87	42.15	28.7	17.49	tr|D6RG13|D6RG13_HUMAN	40S ribosomal protein S3a (Fragment) OS=Homo sapiens GN=RPS3A PE=1 SV=1	HUMAN	5
276	7.86	7.86	34.32	18.99	10.53	sp|P26641|EF1G_HUMAN	Elongation factor 1-gamma OS=Homo sapiens GN=EEF1G PE=1 SV=3	HUMAN	4
277	7.86	7.86	38.31	30.27	27.59	sp|P30040|ERP29_HUMAN	Endoplasmic reticulum resident protein 29 OS=Homo sapiens GN=ERP29 PE=1 SV=4	HUMAN	6
278	7.84	7.84	26.62	24.33	24.33	tr|C9J9K3|C9J9K3_HUMAN	40S ribosomal protein SA (Fragment) OS=Homo sapiens GN=RPSA PE=1 SV=4	HUMAN	4
278	0	7.84	23.73	21.69	21.69	sp|P08865|RSSA_HUMAN	40S ribosomal protein SA OS=Homo sapiens GN=RPSA PE=1 SV=4	HUMAN	4
278	0	6.01	17.63	15.59	15.59	tr|A6NE09|A6NE09_HUMAN	40S ribosomal protein SA OS=Homo sapiens GN=RPSAP58 PE=1 SV=1	HUMAN	3
279	7.8	7.8	6.522	5.754	5.754	sp|Q96JK4|HIPL1_HUMAN	HHIP-like protein 1 OS=Homo sapiens GN=HHIPL1 PE=2 SV=2	HUMAN	4
280	7.76	7.77	21.27	10.28	6.064	sp|P19021|AMD_HUMAN	Peptidyl-glycine alpha-amidating monooxygenase OS=Homo sapiens GN=PAM PE=1 SV=2	HUMAN	5
280	0	6.6	22.39	13.4	7.364	tr|H7BYD9|H7BYD9_HUMAN	Peptidyl-glycine alpha-amidating monooxygenase (Fragment) OS=Homo sapiens GN=PAM PE=1 SV=1	HUMAN	4
281	7.72	8.47	13.83	11.02	11.02	tr|E7ESF4|E7ESF4_HUMAN	Tissue-type plasminogen activator OS=Homo sapiens GN=PLAT PE=1 SV=1	HUMAN	5
281	0	8.47	15.83	12.61	12.61	tr|B4DNJ1|B4DNJ1_HUMAN	Tissue-type plasminogen activator OS=Homo sapiens GN=PLAT PE=1 SV=1	HUMAN	5
281	0	8.47	14.59	11.63	11.63	tr|B4DN26|B4DN26_HUMAN	Tissue-type plasminogen activator OS=Homo sapiens GN=PLAT PE=1 SV=1	HUMAN	5
281	0	8.47	12.28	9.786	9.786	sp|P00750|TPA_HUMAN	Tissue-type plasminogen activator OS=Homo sapiens GN=PLAT PE=1 SV=1	HUMAN	5
282	7.69	7.69	35.14	21.43	16.86	sp|O75787|RENR_HUMAN	Renin receptor OS=Homo sapiens GN=ATP6AP2 PE=1 SV=2	HUMAN	4
282	0	6.23	44.4	25.87	19.69	tr|H7C3E1|H7C3E1_HUMAN	Renin receptor (Fragment) OS=Homo sapiens GN=ATP6AP2 PE=1 SV=1	HUMAN	3
283	7.56	7.56	62.5	44.85	36.76	sp|P47929|LEG7_HUMAN	Galectin-7 OS=Homo sapiens GN=LGALS7 PE=1 SV=2	HUMAN	4
284	7.48	7.48	23.52	19	15.91	sp|Q9UI42|CBPA4_HUMAN	Carboxypeptidase A4 OS=Homo sapiens GN=CPA4 PE=1 SV=2	HUMAN	4
284	0	5.35	24.29	18.3	14.2	tr|B7Z5J4|B7Z5J4_HUMAN	Carboxypeptidase A4 OS=Homo sapiens GN=CPA4 PE=1 SV=1	HUMAN	3
285	7.48	7.48	35.37	23.81	23.81	sp|P68871|HBB_HUMAN	Hemoglobin subunit beta OS=Homo sapiens GN=HBB PE=1 SV=2	HUMAN	4
285	0	6	44.44	25.56	25.56	tr|F8W6P5|F8W6P5_HUMAN	Hemoglobin subunit beta (Fragment) OS=Homo sapiens GN=HBB PE=1 SV=1	HUMAN	3
286	7.44	7.46	19.7	11.17	9.852	sp|P12956|XRCC6_HUMAN	X-ray repair cross-complementing protein 6 OS=Homo sapiens GN=XRCC6 PE=1 SV=2	HUMAN	4
286	0	5.28	21.47	10.2	8.766	tr|B1AHC9|B1AHC9_HUMAN	X-ray repair cross-complementing protein 6 OS=Homo sapiens GN=XRCC6 PE=1 SV=1	HUMAN	3
287	7.42	7.43	23.01	15.96	13.17	sp|P50991|TCPD_HUMAN	T-complex protein 1 subunit delta OS=Homo sapiens GN=CCT4 PE=1 SV=4	HUMAN	4
288	7.4	7.4	34.26	24.91	21.45	sp|P00491|PNPH_HUMAN	Purine nucleoside phosphorylase OS=Homo sapiens GN=PNP PE=1 SV=2	HUMAN	5
289	7.39	7.39	25.79	12.61	12.61	sp|P21695|GPDA_HUMAN	Glycerol-3-phosphate dehydrogenase [NAD(+)], cytoplasmic OS=Homo sapiens GN=GPD1 PE=1 SV=4	HUMAN	5
290	7.37	7.37	30.84	21.31	16.45	sp|P78371|TCPB_HUMAN	T-complex protein 1 subunit beta OS=Homo sapiens GN=CCT2 PE=1 SV=4	HUMAN	7
291	7.31	10.48	45.1	38.04	28.24	sp|P62258|1433E_HUMAN	14-3-3 protein epsilon OS=Homo sapiens GN=YWHAE PE=1 SV=1	HUMAN	7
291	0	6.98	64.49	55.14	47.66	tr|I3L3T1|I3L3T1_HUMAN	14-3-3 protein epsilon OS=Homo sapiens GN=YWHAE PE=1 SV=1	HUMAN	5
291	0	6.98	73.4	62.77	54.26	tr|B4DJF2|B4DJF2_HUMAN	14-3-3 protein epsilon OS=Homo sapiens GN=YWHAE PE=1 SV=1	HUMAN	5
292	7.3	7.3	30.47	20.14	14.19	sp|Q10471|GALT2_HUMAN	Polypeptide N-acetylgalactosaminyltransferase 2 OS=Homo sapiens GN=GALNT2 PE=1 SV=1	HUMAN	6
293	7.27	7.27	48.45	27.13	27.13	sp|P22692|IBP4_HUMAN	Insulin-like growth factor-binding protein 4 OS=Homo sapiens GN=IGFBP4 PE=1 SV=2	HUMAN	13
294	7.25	7.34	18.4	13.69	6.086	sp|P26639|SYTC_HUMAN	Threonine--tRNA ligase, cytoplasmic OS=Homo sapiens GN=TARS PE=1 SV=3	HUMAN	4
295	7.14	7.14	52.56	32.05	32.05	sp|P62979|RS27A_HUMAN	Ubiquitin-40S ribosomal protein S27a OS=Homo sapiens GN=RPS27A PE=1 SV=2	HUMAN	5
295	0	7.14	78.69	65.57	65.57	tr|Q96C32|Q96C32_HUMAN	Polyubiquitin-C OS=Homo sapiens GN=UBC PE=1 SV=1	HUMAN	5
295	0	7.14	78.6	65.5	65.5	tr|Q5PY61|Q5PY61_HUMAN	Polyubiquitin-C OS=Homo sapiens GN=UBC PE=1 SV=1	HUMAN	5
295	0	7.14	56.6	47.17	47.17	tr|J3QTR3|J3QTR3_HUMAN	Ubiquitin-40S ribosomal protein S27a (Fragment) OS=Homo sapiens GN=RPS27A PE=1 SV=1	HUMAN	5
295	0	7.14	70.97	60.22	60.22	tr|J3QS39|J3QS39_HUMAN	Polyubiquitin-B (Fragment) OS=Homo sapiens GN=UBB PE=1 SV=1	HUMAN	5
295	0	7.14	78.16	68.45	68.45	tr|J3QKN0|J3QKN0_HUMAN	Polyubiquitin-B (Fragment) OS=Homo sapiens GN=UBB PE=1 SV=1	HUMAN	5
295	0	7.14	78.75	66.25	66.25	tr|F5H747|F5H747_HUMAN	Polyubiquitin-C (Fragment) OS=Homo sapiens GN=UBC PE=1 SV=4	HUMAN	5
295	0	7.14	77.87	69.67	69.67	tr|F5H6Q2|F5H6Q2_HUMAN	Polyubiquitin-C (Fragment) OS=Homo sapiens GN=UBC PE=1 SV=4	HUMAN	5
295	0	7.14	77.42	64.52	64.52	tr|F5H388|F5H388_HUMAN	Polyubiquitin-C (Fragment) OS=Homo sapiens GN=UBC PE=1 SV=1	HUMAN	5
295	0	7.14	74.26	66.91	66.91	tr|F5H2Z3|F5H2Z3_HUMAN	Polyubiquitin-C (Fragment) OS=Homo sapiens GN=UBC PE=1 SV=1	HUMAN	5
295	0	7.14	80.54	67.11	67.11	tr|F5H265|F5H265_HUMAN	Polyubiquitin-C (Fragment) OS=Homo sapiens GN=UBC PE=1 SV=1	HUMAN	5
295	0	7.14	75.37	67.91	67.91	tr|F5GYU3|F5GYU3_HUMAN	Polyubiquitin-C (Fragment) OS=Homo sapiens GN=UBC PE=1 SV=1	HUMAN	5
295	0	7.14	74.56	62.72	62.72	tr|F5GXK7|F5GXK7_HUMAN	Polyubiquitin-C (Fragment) OS=Homo sapiens GN=UBC PE=1 SV=2	HUMAN	5
295	0	7.14	78.43	65.36	65.36	tr|B4DV12|B4DV12_HUMAN	Polyubiquitin-B OS=Homo sapiens GN=UBB PE=1 SV=1	HUMAN	5
295	0	7.14	46.88	39.06	39.06	sp|P62987|RL40_HUMAN	Ubiquitin-60S ribosomal protein L40 OS=Homo sapiens GN=UBA52 PE=1 SV=2	HUMAN	5
295	0	7.14	78.83	65.69	65.69	sp|P0CG48|UBC_HUMAN	Polyubiquitin-C OS=Homo sapiens GN=UBC PE=1 SV=3	HUMAN	5
295	0	7.14	78.6	65.5	65.5	sp|P0CG47|UBB_HUMAN	Polyubiquitin-B OS=Homo sapiens GN=UBB PE=1 SV=1	HUMAN	5
295	0	7.1	49.34	44.54	44.54	tr|J3QRK5|J3QRK5_HUMAN	Protein UBBP4 OS=Homo sapiens GN=UBBP4 PE=1 SV=1	HUMAN	5
295	0	7.1	39.29	38.84	38.84	tr|J3QLP7|J3QLP7_HUMAN	Protein UBBP4 OS=Homo sapiens GN=UBBP4 PE=1 SV=1	HUMAN	5
295	0	5.31	79.37	65.08	65.08	tr|M0R1V7|M0R1V7_HUMAN	Ubiquitin-60S ribosomal protein L40 (Fragment) OS=Homo sapiens GN=UBA52 PE=1 SV=1	HUMAN	4
295	0	5.31	75.76	62.12	62.12	tr|A0A087WV77|A0A087WV77_HUMAN	Ubiquitin-40S ribosomal protein S27a OS=Homo sapiens GN=RPS27A PE=4 SV=1	HUMAN	4
295	0	5.27	67.21	67.21	67.21	tr|F5GZ39|F5GZ39_HUMAN	Polyubiquitin-C (Fragment) OS=Homo sapiens GN=UBC PE=4 SV=1	HUMAN	4
296	7.11	20.15	58.53	54.84	39.4	sp|P09104|ENOG_HUMAN	Gamma-enolase OS=Homo sapiens GN=ENO2 PE=1 SV=3	HUMAN	14
297	7.06	43.92	75.96	69.95	61.75	tr|H3BR70|H3BR70_HUMAN	Pyruvate kinase OS=Homo sapiens GN=PKM PE=1 SV=1	HUMAN	41
297	0	64.12	77.11	72.78	65.15	tr|H3BTN5|H3BTN5_HUMAN	Pyruvate kinase (Fragment) OS=Homo sapiens GN=PKM PE=1 SV=1	HUMAN	52
298	7.05	7.06	30.45	19.65	14.47	sp|P61978|HNRPK_HUMAN	Heterogeneous nuclear ribonucleoprotein K OS=Homo sapiens GN=HNRNPK PE=1 SV=1	HUMAN	4
298	0	6.24	31.13	17.94	11.61	tr|Q5T6W2|Q5T6W2_HUMAN	Heterogeneous nuclear ribonucleoprotein K (Fragment) OS=Homo sapiens GN=HNRNPK PE=1 SV=1	HUMAN	3
299	7.01	7.06	44.44	27.97	19.16	sp|Q14847|LASP1_HUMAN	LIM and SH3 domain protein 1 OS=Homo sapiens GN=LASP1 PE=1 SV=2	HUMAN	4
299	0	7.02	56.63	43.98	30.12	tr|C9J9W2|C9J9W2_HUMAN	LIM and SH3 domain protein 1 (Fragment) OS=Homo sapiens GN=LASP1 PE=1 SV=1	HUMAN	4
300	7	7.02	20.21	10.26	8.27	sp|P33908|MA1A1_HUMAN	Mannosyl-oligosaccharide 1,2-alpha-mannosidase IA OS=Homo sapiens GN=MAN1A1 PE=1 SV=3	HUMAN	4
301	6.99	7	57.98	49.58	42.86	tr|E5RJD8|E5RJD8_HUMAN	Tubulin-specific chaperone A OS=Homo sapiens GN=TBCA PE=1 SV=1	HUMAN	5
301	0	7	82.14	70.24	60.71	tr|E5RIW3|E5RIW3_HUMAN	Tubulin-specific chaperone A OS=Homo sapiens GN=TBCA PE=1 SV=1	HUMAN	5
301	0	7	63.89	54.63	47.22	sp|O75347|TBCA_HUMAN	Tubulin-specific chaperone A OS=Homo sapiens GN=TBCA PE=1 SV=3	HUMAN	5
301	0	5.82	45.8	38.17	32.06	tr|E5RHG6|E5RHG6_HUMAN	Tubulin-specific chaperone A OS=Homo sapiens GN=TBCA PE=1 SV=2	HUMAN	4
302	6.99	6.99	8.175	5.825	5.825	sp|Q86YZ3|HORN_HUMAN	Hornerin OS=Homo sapiens GN=HRNR PE=1 SV=2	HUMAN	5
303	6.96	6.96	60.53	51.97	35.53	sp|P62269|RS18_HUMAN	40S ribosomal protein S18 OS=Homo sapiens GN=RPS18 PE=1 SV=3	HUMAN	5
304	6.95	6.95	22.96	21.45	16.92	tr|M0QXB4|M0QXB4_HUMAN	Coatomer protein complex, subunit epsilon, isoform CRA_g OS=Homo sapiens GN=COPE PE=1 SV=1	HUMAN	4
304	0	6.95	24.68	23.05	18.18	sp|O14579|COPE_HUMAN	Coatomer subunit epsilon OS=Homo sapiens GN=COPE PE=1 SV=3	HUMAN	4
304	0	5.05	29.45	29.45	29.45	tr|M0R061|M0R061_HUMAN	Coatomer subunit epsilon OS=Homo sapiens GN=COPE PE=1 SV=1	HUMAN	3
304	0	4.74	17.59	15.96	11.07	tr|A0A087X0I4|A0A087X0I4_HUMAN	Coatomer subunit epsilon OS=Homo sapiens GN=COPE PE=1 SV=1	HUMAN	3
305	6.94	6.94	45.63	33.08	26.24	sp|P62701|RS4X_HUMAN	40S ribosomal protein S4, X isoform OS=Homo sapiens GN=RPS4X PE=1 SV=2	HUMAN	6
306	6.89	6.89	18.87	16.04	11.64	sp|P11940|PABP1_HUMAN	Polyadenylate-binding protein 1 OS=Homo sapiens GN=PABPC1 PE=1 SV=2	HUMAN	5
306	0	6.89	18.54	16.89	12.25	tr|E7ERJ7|E7ERJ7_HUMAN	Polyadenylate-binding protein OS=Homo sapiens GN=PABPC1 PE=1 SV=1	HUMAN	5
306	0	6.65	18.44	15.4	12.52	tr|E7EQV3|E7EQV3_HUMAN	Polyadenylate-binding protein OS=Homo sapiens GN=PABPC1 PE=1 SV=1	HUMAN	5
306	0	4.6	18.2	14.75	9.387	tr|A0A087WTT1|A0A087WTT1_HUMAN	Polyadenylate-binding protein OS=Homo sapiens GN=PABPC1 PE=1 SV=1	HUMAN	4
307	6.87	25.14	55.51	46.85	44.88	sp|P18669|PGAM1_HUMAN	Phosphoglycerate mutase 1 OS=Homo sapiens GN=PGAM1 PE=1 SV=2	HUMAN	16
308	6.87	6.87	41	23.67	17	sp|O15144|ARPC2_HUMAN	Actin-related protein 2/3 complex subunit 2 OS=Homo sapiens GN=ARPC2 PE=1 SV=1	HUMAN	4
309	6.85	7.73	26.72	12.07	8.836	sp|P78539|SRPX_HUMAN	Sushi repeat-containing protein SRPX OS=Homo sapiens GN=SRPX PE=1 SV=1	HUMAN	5
310	6.82	6.82	34.44	23.84	19.21	sp|O76061|STC2_HUMAN	Stanniocalcin-2 OS=Homo sapiens GN=STC2 PE=1 SV=1	HUMAN	5
311	6.79	7	27.18	20	16.67	sp|P01137|TGFB1_HUMAN	Transforming growth factor beta-1 OS=Homo sapiens GN=TGFB1 PE=1 SV=2	HUMAN	4
312	6.79	6.79	47.06	36.65	33.48	tr|D6RAF8|D6RAF8_HUMAN	Heterogeneous nuclear ribonucleoprotein D0 (Fragment) OS=Homo sapiens GN=HNRNPD PE=1 SV=1	HUMAN	5
312	0	6.79	29.3	22.82	20.85	sp|Q14103|HNRPD_HUMAN	Heterogeneous nuclear ribonucleoprotein D0 OS=Homo sapiens GN=HNRNPD PE=1 SV=1	HUMAN	5
312	0	4.7	40.95	30	26.67	tr|H0YA96|H0YA96_HUMAN	Heterogeneous nuclear ribonucleoprotein D0 (Fragment) OS=Homo sapiens GN=HNRNPD PE=1 SV=1	HUMAN	4
312	0	4.7	33.08	24.23	21.54	tr|H0Y8G5|H0Y8G5_HUMAN	Heterogeneous nuclear ribonucleoprotein D0 (Fragment) OS=Homo sapiens GN=HNRNPD PE=1 SV=4	HUMAN	4
313	6.77	6.78	18.17	6.938	6.278	sp|Q13200|PSMD2_HUMAN	26S proteasome non-ATPase regulatory subunit 2 OS=Homo sapiens GN=PSMD2 PE=1 SV=3	HUMAN	4
314	6.77	6.77	42.71	26.63	20.1	tr|H3BPK4|H3BPK4_HUMAN	Myosin regulatory light chain 2, skeletal muscle isoform (Fragment) OS=Homo sapiens GN=MYLPF PE=1 SV=1	HUMAN	4
314	0	6.77	50.3	31.36	23.67	sp|Q96A32|MLRS_HUMAN	Myosin regulatory light chain 2, skeletal muscle isoform OS=Homo sapiens GN=MYLPF PE=2 SV=1	HUMAN	4
314	0	6.77	50.37	39.26	29.63	tr|H3BN54|H3BN54_HUMAN	Myosin regulatory light chain 2, skeletal muscle isoform (Fragment) OS=Homo sapiens GN=MYLPF PE=1 SV=1	HUMAN	4
314	0	6.77	57.63	44.92	33.9	tr|H3BML9|H3BML9_HUMAN	Myosin regulatory light chain 2, skeletal muscle isoform (Fragment) OS=Homo sapiens GN=MYLPF PE=1 SV=1	HUMAN	4
315	6.75	6.75	21.75	17.52	15.41	sp|Q15293|RCN1_HUMAN	Reticulocalbin-1 OS=Homo sapiens GN=RCN1 PE=1 SV=1	HUMAN	4
316	6.73	6.73	36.03	18.18	16.16	sp|P46777|RL5_HUMAN	60S ribosomal protein L5 OS=Homo sapiens GN=RPL5 PE=1 SV=3	HUMAN	5
317	6.71	6.71	64.08	55.34	47.57	sp|P62805|H4_HUMAN	Histone H4 OS=Homo sapiens GN=HIST1H4A PE=1 SV=2	HUMAN	5
318	6.7	6.7	23.08	17.95	11.28	sp|P08237|PFKAM_HUMAN	ATP-dependent 6-phosphofructokinase, muscle type OS=Homo sapiens GN=PFKM PE=1 SV=2	HUMAN	6
319	6.67	6.77	16.59	11.11	8.371	sp|P42357|HUTH_HUMAN	Histidine ammonia-lyase OS=Homo sapiens GN=HAL PE=1 SV=1	HUMAN	4
320	6.63	6.63	28.57	28.57	24.6	tr|G3V5Z7|G3V5Z7_HUMAN	Proteasome subunit alpha type OS=Homo sapiens GN=PSMA6 PE=1 SV=1	HUMAN	5
320	0	6.63	29.27	29.27	25.2	sp|P60900|PSA6_HUMAN	Proteasome subunit alpha type-6 OS=Homo sapiens GN=PSMA6 PE=1 SV=1	HUMAN	5
320	0	4.33	26.6	26.6	21.67	tr|G3V295|G3V295_HUMAN	Proteasome subunit alpha type OS=Homo sapiens GN=PSMA6 PE=1 SV=1	HUMAN	4
321	6.59	6.65	20.55	13.16	9.774	sp|P05556|ITB1_HUMAN	Integrin beta-1 OS=Homo sapiens GN=ITGB1 PE=1 SV=2	HUMAN	5
322	6.59	6.59	35.38	35.38	35.38	sp|Q93077|H2A1C_HUMAN	Histone H2A type 1-C OS=Homo sapiens GN=HIST1H2AC PE=1 SV=3	HUMAN	4
322	0	6.59	35.38	35.38	35.38	sp|Q7L7L0|H2A3_HUMAN	Histone H2A type 3 OS=Homo sapiens GN=HIST3H2A PE=1 SV=3	HUMAN	4
322	0	6.59	35.38	35.38	35.38	sp|P04908|H2A1B_HUMAN	Histone H2A type 1-B/E OS=Homo sapiens GN=HIST1H2AB PE=1 SV=2	HUMAN	4
322	0	6.03	35.94	35.94	35.94	sp|Q99878|H2A1J_HUMAN	Histone H2A type 1-J OS=Homo sapiens GN=HIST1H2AJ PE=1 SV=3	HUMAN	4
322	0	6.03	35.94	35.94	35.94	sp|Q96KK5|H2A1H_HUMAN	Histone H2A type 1-H OS=Homo sapiens GN=HIST1H2AH PE=1 SV=3	HUMAN	4
322	0	6.03	35.38	35.38	35.38	sp|Q6FI13|H2A2A_HUMAN	Histone H2A type 2-A OS=Homo sapiens GN=HIST2H2AA3 PE=1 SV=3	HUMAN	4
322	0	6.03	35.66	35.66	35.66	sp|Q16777|H2A2C_HUMAN	Histone H2A type 2-C OS=Homo sapiens GN=HIST2H2AC PE=1 SV=4	HUMAN	4
322	0	6.03	35.38	35.38	35.38	sp|P20671|H2A1D_HUMAN	Histone H2A type 1-D OS=Homo sapiens GN=HIST1H2AD PE=1 SV=2	HUMAN	4
322	0	6.03	35.38	35.38	35.38	sp|P0C0S8|H2A1_HUMAN	Histone H2A type 1 OS=Homo sapiens GN=HIST1H2AG PE=1 SV=2	HUMAN	4
322	0	4.55	38.93	35.11	26.72	sp|Q96QV6|H2A1A_HUMAN	Histone H2A type 1-A OS=Homo sapiens GN=HIST1H2AA PE=1 SV=3	HUMAN	3
322	0	4.54	32.17	32.17	24.48	sp|P16104|H2AX_HUMAN	Histone H2AX OS=Homo sapiens GN=H2AFX PE=1 SV=2	HUMAN	3
323	6.57	6.62	12.69	4.525	3.091	sp|P35606|COPB2_HUMAN	Coatomer subunit beta' OS=Homo sapiens GN=COPB2 PE=1 SV=2	HUMAN	4
324	6.56	6.57	56.5	40.68	33.33	tr|J3QRS3|J3QRS3_HUMAN	Myosin regulatory light chain 12A OS=Homo sapiens GN=MYL12A PE=1 SV=1	HUMAN	7
324	0	6.57	52.63	42.11	34.5	sp|P19105|ML12A_HUMAN	Myosin regulatory light chain 12A OS=Homo sapiens GN=MYL12A PE=1 SV=2	HUMAN	7
324	0	6.57	52.33	41.86	34.3	sp|O14950|ML12B_HUMAN	Myosin regulatory light chain 12B OS=Homo sapiens GN=MYL12B PE=1 SV=2	HUMAN	7
325	6.55	8.12	36.29	27.15	20.63	sp|O95084|PRS23_HUMAN	Serine protease 23 OS=Homo sapiens GN=PRSS23 PE=1 SV=1	HUMAN	6
326	6.52	6.6	40.3	35.36	30.04	sp|P25786|PSA1_HUMAN	Proteasome subunit alpha type-1 OS=Homo sapiens GN=PSMA1 PE=1 SV=1	HUMAN	7
327	6.52	6.52	24.77	14.95	13.32	tr|M0R1G9|M0R1G9_HUMAN	Pregnancy-specific beta-1-glycoprotein 5 OS=Homo sapiens GN=PSG5 PE=1 SV=1	HUMAN	4
327	0	5.44	27.46	16.42	14.33	sp|Q15238|PSG5_HUMAN	Pregnancy-specific beta-1-glycoprotein 5 OS=Homo sapiens GN=PSG5 PE=1 SV=3	HUMAN	3
328	6.46	12.37	49.8	36.44	27.94	sp|P61981|1433G_HUMAN	14-3-3 protein gamma OS=Homo sapiens GN=YWHAG PE=1 SV=2	HUMAN	8
329	6.42	6.42	16.82	13.64	9.848	tr|A0A0A0MRG2|A0A0A0MRG2_HUMAN	Amyloid beta A4 protein OS=Homo sapiens GN=APP PE=1 SV=1	HUMAN	6
329	0	6.42	14.42	11.69	8.442	sp|P05067|A4_HUMAN	Amyloid beta A4 protein OS=Homo sapiens GN=APP PE=1 SV=3	HUMAN	6
329	0	6.42	14.29	12.61	9.104	tr|E9PG40|E9PG40_HUMAN	Amyloid beta A4 protein OS=Homo sapiens GN=APP PE=1 SV=1	HUMAN	6
329	0	6.18	14.23	11.75	10.1	tr|H7C0V9|H7C0V9_HUMAN	Amyloid beta A4 protein (Fragment) OS=Homo sapiens GN=APP PE=1 SV=1	HUMAN	5
330	6.33	6.33	32.14	21.88	17.86	sp|Q00688|FKBP3_HUMAN	Peptidyl-prolyl cis-trans isomerase FKBP3 OS=Homo sapiens GN=FKBP3 PE=1 SV=1	HUMAN	4
331	6.32	6.32	47.09	33.33	29.63	sp|Q99497|PARK7_HUMAN	Protein deglycase DJ-1 OS=Homo sapiens GN=PARK7 PE=1 SV=2	HUMAN	5
331	0	4.17	37.28	21.89	17.75	tr|K7ELW0|K7ELW0_HUMAN	Protein DJ-1 OS=Homo sapiens GN=PARK7 PE=1 SV=1	HUMAN	4
332	6.26	6.26	21.2	10.14	8.756	tr|A0A087WSY9|A0A087WSY9_HUMAN	Thioredoxin reductase 1, cytoplasmic OS=Homo sapiens GN=TXNRD1 PE=1 SV=1	HUMAN	3
332	0	6.26	25.18	12.04	10.4	tr|A0A087WSW9|A0A087WSW9_HUMAN	Thioredoxin reductase 1, cytoplasmic OS=Homo sapiens GN=TXNRD1 PE=1 SV=1	HUMAN	3
332	0	6.26	21.26	10.17	8.783	sp|Q16881|TRXR1_HUMAN	Thioredoxin reductase 1, cytoplasmic OS=Homo sapiens GN=TXNRD1 PE=1 SV=3	HUMAN	3
332	0	6.26	23.49	13.25	11.45	tr|F8W809|F8W809_HUMAN	Thioredoxin reductase 1, cytoplasmic OS=Homo sapiens GN=TXNRD1 PE=1 SV=1	HUMAN	3
332	0	6.26	20.6	11.62	10.04	tr|E9PNQ6|E9PNQ6_HUMAN	Thioredoxin reductase 1, cytoplasmic OS=Homo sapiens GN=TXNRD1 PE=1 SV=1	HUMAN	3
332	0	6.26	24.27	13.69	11.83	tr|E9PIR7|E9PIR7_HUMAN	Thioredoxin reductase 1, cytoplasmic OS=Homo sapiens GN=TXNRD1 PE=1 SV=1	HUMAN	3
333	6.26	6.26	11.81	8.278	6.512	sp|P19022|CADH2_HUMAN	Cadherin-2 OS=Homo sapiens GN=CDH2 PE=1 SV=4	HUMAN	4
334	6.22	6.22	34.66	21.02	13.35	tr|B4DY09|B4DY09_HUMAN	Interleukin enhancer-binding factor 2 OS=Homo sapiens GN=ILF2 PE=1 SV=1	HUMAN	3
334	0	6.22	31.28	18.97	12.05	sp|Q12905|ILF2_HUMAN	Interleukin enhancer-binding factor 2 OS=Homo sapiens GN=ILF2 PE=1 SV=2	HUMAN	3
335	6.21	6.24	13.41	5.105	5.105	sp|Q9Y4L1|HYOU1_HUMAN	Hypoxia up-regulated protein 1 OS=Homo sapiens GN=HYOU1 PE=1 SV=1	HUMAN	4
335	0	6.24	13.23	5.443	5.443	tr|A0A087X054|A0A087X054_HUMAN	Hypoxia up-regulated protein 1 OS=Homo sapiens GN=HYOU1 PE=1 SV=1	HUMAN	4
336	6.21	6.21	8.819	4.488	3.701	sp|Q08211|DHX9_HUMAN	ATP-dependent RNA helicase A OS=Homo sapiens GN=DHX9 PE=1 SV=4	HUMAN	3
337	6.19	6.19	34.25	21.46	21.46	sp|P49755|TMEDA_HUMAN	Transmembrane emp24 domain-containing protein 10 OS=Homo sapiens GN=TMED10 PE=1 SV=2	HUMAN	5
338	6.18	6.18	55.7	40.94	24.83	sp|P16949|STMN1_HUMAN	Stathmin OS=Homo sapiens GN=STMN1 PE=1 SV=3	HUMAN	3
338	0	4.79	69.41	60	31.76	tr|A2A2D0|A2A2D0_HUMAN	Stathmin (Fragment) OS=Homo sapiens GN=STMN1 PE=1 SV=4	HUMAN	2
339	6.17	6.18	20	15.06	12.94	tr|D6RGI3|D6RGI3_HUMAN	Septin 11, isoform CRA_b OS=Homo sapiens GN=SEPT11 PE=1 SV=1	HUMAN	4
339	0	6.18	19.68	14.81	12.73	tr|D6RER5|D6RER5_HUMAN	Septin-11 OS=Homo sapiens GN=SEPT11 PE=1 SV=1	HUMAN	4
339	0	6.18	19.81	14.92	12.82	sp|Q9NVA2|SEP11_HUMAN	Septin-11 OS=Homo sapiens GN=SEPT11 PE=1 SV=3	HUMAN	4
340	6.16	6.19	4.676	0.6002	0.2112	tr|A0A0A0MTS7|A0A0A0MTS7_HUMAN	Titin OS=Homo sapiens GN=TTN PE=1 SV=1	HUMAN	6
340	0	4	4.76	0.6055	0.198	sp|Q8WZ42|TITIN_HUMAN	Titin OS=Homo sapiens GN=TTN PE=1 SV=4	HUMAN	5
341	6.09	6.09	29.03	21.2	21.2	sp|P62906|RL10A_HUMAN	60S ribosomal protein L10a OS=Homo sapiens GN=RPL10A PE=1 SV=2	HUMAN	5
342	6.08	6.08	40.76	36.94	27.39	sp|P98179|RBM3_HUMAN	RNA-binding protein 3 OS=Homo sapiens GN=RBM3 PE=1 SV=1	HUMAN	3
343	6.05	6.05	13.45	3.337	3.337	sp|Q86Y38|XYLT1_HUMAN	Xylosyltransferase 1 OS=Homo sapiens GN=XYLT1 PE=1 SV=1	HUMAN	3
344	6.03	6.03	28.17	25.82	25.82	tr|H0YHX9|H0YHX9_HUMAN	Nascent polypeptide-associated complex subunit alpha, muscle-specific form (Fragment) OS=Homo sapiens GN=NACA PE=1 SV=1	HUMAN	4
344	0	6.03	30.3	27.78	27.78	tr|F8W0W4|F8W0W4_HUMAN	Nascent polypeptide-associated complex subunit alpha, muscle-specific form (Fragment) OS=Homo sapiens GN=NACA PE=1 SV=1	HUMAN	4
344	0	6.03	44.12	40.44	40.44	tr|F8VZJ2|F8VZJ2_HUMAN	Nascent polypeptide-associated complex subunit alpha, muscle-specific form OS=Homo sapiens GN=NACA PE=1 SV=1	HUMAN	4
344	0	6.03	27.91	25.58	25.58	sp|Q13765|NACA_HUMAN	Nascent polypeptide-associated complex subunit alpha OS=Homo sapiens GN=NACA PE=1 SV=1	HUMAN	4
344	0	5.8	4.379	2.647	2.647	sp|E9PAV3|NACAM_HUMAN	Nascent polypeptide-associated complex subunit alpha, muscle-specific form OS=Homo sapiens GN=NACA PE=1 SV=1	HUMAN	4
344	0	4.67	59.15	59.15	59.15	tr|F8W1N5|F8W1N5_HUMAN	Nascent polypeptide-associated complex subunit alpha, muscle-specific form (Fragment) OS=Homo sapiens GN=NACA PE=1 SV=1	HUMAN	3
344	0	4.67	28.38	28.38	28.38	tr|F8VNW4|F8VNW4_HUMAN	Nascent polypeptide-associated complex subunit alpha, muscle-specific form (Fragment) OS=Homo sapiens GN=NACA PE=1 SV=1	HUMAN	3
345	6.01	6.01	39.76	36.14	27.11	tr|U3KQK0|U3KQK0_HUMAN	Histone H2B OS=Homo sapiens GN=HIST1H2BN PE=1 SV=1	HUMAN	8
345	0	6.01	52.38	47.62	35.71	sp|Q99879|H2B1M_HUMAN	Histone H2B type 1-M OS=Homo sapiens GN=HIST1H2BM PE=1 SV=3	HUMAN	8
345	0	6.01	52.38	47.62	35.71	sp|Q99877|H2B1N_HUMAN	Histone H2B type 1-N OS=Homo sapiens GN=HIST1H2BN PE=1 SV=3	HUMAN	8
345	0	6.01	52.38	47.62	35.71	sp|Q93079|H2B1H_HUMAN	Histone H2B type 1-H OS=Homo sapiens GN=HIST1H2BH PE=1 SV=3	HUMAN	8
345	0	6.01	52.38	47.62	35.71	sp|Q5QNW6|H2B2F_HUMAN	Histone H2B type 2-F OS=Homo sapiens GN=HIST2H2BF PE=1 SV=3	HUMAN	8
345	0	6.01	52.38	47.62	35.71	sp|P62807|H2B1C_HUMAN	Histone H2B type 1-C/E/F/G/I OS=Homo sapiens GN=HIST1H2BC PE=1 SV=4	HUMAN	8
345	0	6.01	52.38	47.62	35.71	sp|P58876|H2B1D_HUMAN	Histone H2B type 1-D OS=Homo sapiens GN=HIST1H2BD PE=1 SV=2	HUMAN	8
345	0	6.01	52.38	47.62	35.71	sp|O60814|H2B1K_HUMAN	Histone H2B type 1-K OS=Homo sapiens GN=HIST1H2BK PE=1 SV=3	HUMAN	8
345	0	5.99	46.83	41.27	35.71	sp|Q99880|H2B1L_HUMAN	Histone H2B type 1-L OS=Homo sapiens GN=HIST1H2BL PE=1 SV=3	HUMAN	8
345	0	5.99	47.62	47.62	35.71	sp|P57053|H2BFS_HUMAN	Histone H2B type F-S OS=Homo sapiens GN=H2BFS PE=1 SV=2	HUMAN	8
345	0	5.46	52.38	47.62	35.71	sp|P33778|H2B1B_HUMAN	Histone H2B type 1-B OS=Homo sapiens GN=HIST1H2BB PE=1 SV=2	HUMAN	8
345	0	5.46	52.38	47.62	35.71	sp|P23527|H2B1O_HUMAN	Histone H2B type 1-O OS=Homo sapiens GN=HIST1H2BO PE=1 SV=3	HUMAN	8
345	0	5.46	52.38	47.62	35.71	sp|P06899|H2B1J_HUMAN	Histone H2B type 1-J OS=Homo sapiens GN=HIST1H2BJ PE=1 SV=3	HUMAN	8
345	0	5.39	42.86	35.71	35.71	sp|Q8N257|H2B3B_HUMAN	Histone H2B type 3-B OS=Homo sapiens GN=HIST3H2BB PE=1 SV=3	HUMAN	8
346	6.01	6.01	6.462	2.321	2.321	tr|E9PF17|E9PF17_HUMAN	Versican core protein OS=Homo sapiens GN=VCAN PE=1 SV=2	HUMAN	3
346	0	6	3.534	1.09	1.09	sp|P13611|CSPG2_HUMAN	Versican core protein OS=Homo sapiens GN=VCAN PE=1 SV=3	HUMAN	3
346	0	4	5.161	2.339	2.339	tr|D6RGZ6|D6RGZ6_HUMAN	Versican core protein (Fragment) OS=Homo sapiens GN=VCAN PE=1 SV=1	HUMAN	2
346	0	4	13.28	8.192	8.192	tr|Q86W61|Q86W61_HUMAN	VCAN protein OS=Homo sapiens GN=VCAN PE=1 SV=1	HUMAN	2
347	6.01	6.01	12.17	4.464	4.464	sp|Q14574|DSC3_HUMAN	Desmocollin-3 OS=Homo sapiens GN=DSC3 PE=1 SV=3	HUMAN	3
348	6	6.03	19.02	8.149	8.149	sp|P30153|2AAA_HUMAN	Serine/threonine-protein phosphatase 2A 65 kDa regulatory subunit A alpha isoform OS=Homo sapiens GN=PPP2R1A PE=1 SV=4	HUMAN	3
348	0	6	20.98	11.71	11.71	tr|B3KQV6|B3KQV6_HUMAN	Serine/threonine-protein phosphatase 2A 65 kDa regulatory subunit A alpha isoform OS=Homo sapiens GN=PPP2R1A PE=1 SV=1	HUMAN	3
348	0	3.96	22.73	22.73	22.73	tr|E9PH38|E9PH38_HUMAN	Serine/threonine-protein phosphatase 2A 65 kDa regulatory subunit A alpha isoform (Fragment) OS=Homo sapiens GN=PPP2R1A PE=1 SV=2	HUMAN	2
349	6	6	45	45	45	tr|E9PP21|E9PP21_HUMAN	Cysteine and glycine-rich protein 1 OS=Homo sapiens GN=CSRP1 PE=1 SV=1	HUMAN	6
349	0	6	37.31	37.31	37.31	sp|P21291|CSRP1_HUMAN	Cysteine and glycine-rich protein 1 OS=Homo sapiens GN=CSRP1 PE=1 SV=3	HUMAN	6
349	0	5.44	37.25	37.25	37.25	tr|E9PND2|E9PND2_HUMAN	Cysteine and glycine-rich protein 1 (Fragment) OS=Homo sapiens GN=CSRP1 PE=1 SV=1	HUMAN	5
350	5.92	5.92	18.33	10.56	10.56	tr|H0Y2Y8|H0Y2Y8_HUMAN	Zyxin (Fragment) OS=Homo sapiens GN=ZYX PE=1 SV=1	HUMAN	4
350	0	5.92	17.31	9.965	9.965	sp|Q15942|ZYX_HUMAN	Zyxin OS=Homo sapiens GN=ZYX PE=1 SV=1	HUMAN	4
351	5.9	8.31	27.16	18.02	11.85	sp|Q96P63|SPB12_HUMAN	Serpin B12 OS=Homo sapiens GN=SERPINB12 PE=1 SV=1	HUMAN	5
352	5.9	5.9	23.33	13.73	11.18	sp|P07954|FUMH_HUMAN	Fumarate hydratase, mitochondrial OS=Homo sapiens GN=FH PE=1 SV=3	HUMAN	4
353	5.86	5.86	17.76	7.873	5.193	sp|Q15046|SYK_HUMAN	Lysine--tRNA ligase OS=Homo sapiens GN=KARS PE=1 SV=3	HUMAN	3
353	0	4	29.41	23.53	23.53	tr|J3KRL2|J3KRL2_HUMAN	Lysine--tRNA ligase (Fragment) OS=Homo sapiens GN=KARS PE=1 SV=1	HUMAN	2
353	0	4	28.85	23.08	23.08	tr|H3BPV7|H3BPV7_HUMAN	Lysine--tRNA ligase (Fragment) OS=Homo sapiens GN=KARS PE=1 SV=1	HUMAN	2
354	5.86	5.86	17.39	9.058	6.159	tr|B0YIW6|B0YIW6_HUMAN	Archain 1, isoform CRA_a OS=Homo sapiens GN=ARCN1 PE=1 SV=1	HUMAN	3
354	0	5.86	18.79	9.785	6.654	sp|P48444|COPD_HUMAN	Coatomer subunit delta OS=Homo sapiens GN=ARCN1 PE=1 SV=1	HUMAN	3
355	5.82	5.82	42.7	30.9	26.97	sp|O15145|ARPC3_HUMAN	Actin-related protein 2/3 complex subunit 3 OS=Homo sapiens GN=ARPC3 PE=1 SV=3	HUMAN	5
355	0	4.93	51.52	37.37	37.37	tr|C9JZD1|C9JZD1_HUMAN	Actin-related protein 2/3 complex subunit 3 (Fragment) OS=Homo sapiens GN=ARPC3 PE=1 SV=1	HUMAN	4
355	0	4.02	45.24	28.57	28.57	tr|F8VR50|F8VR50_HUMAN	Actin-related protein 2/3 complex subunit 3 (Fragment) OS=Homo sapiens GN=ARPC3 PE=1 SV=1	HUMAN	3
356	5.8	5.8	15.59	10.73	9.312	sp|P49189|AL9A1_HUMAN	4-trimethylaminobutyraldehyde dehydrogenase OS=Homo sapiens GN=ALDH9A1 PE=1 SV=3	HUMAN	4
357	5.79	5.83	24.39	10.15	8.511	sp|P09960|LKHA4_HUMAN	Leukotriene A-4 hydrolase OS=Homo sapiens GN=LTA4H PE=1 SV=2	HUMAN	4
358	5.79	5.79	28.16	15.99	10.02	sp|P49767|VEGFC_HUMAN	Vascular endothelial growth factor C OS=Homo sapiens GN=VEGFC PE=1 SV=1	HUMAN	3
359	5.74	17.65	36.25	29.21	18.12	sp|P08729|K2C7_HUMAN	Keratin, type II cytoskeletal 7 OS=Homo sapiens GN=KRT7 PE=1 SV=5	HUMAN	10
360	5.72	5.74	37.25	25.17	13.42	sp|P12236|ADT3_HUMAN	ADP/ATP translocase 3 OS=Homo sapiens GN=SLC25A6 PE=1 SV=4	HUMAN	4
361	5.71	5.71	28.32	24.78	24.78	sp|O00757|F16P2_HUMAN	Fructose-1,6-bisphosphatase isozyme 2 OS=Homo sapiens GN=FBP2 PE=1 SV=2	HUMAN	7
362	5.71	5.71	32.14	22.96	22.96	sp|P30085|KCY_HUMAN	UMP-CMP kinase OS=Homo sapiens GN=CMPK1 PE=1 SV=3	HUMAN	4
362	0	3.98	36.09	20.12	20.12	tr|Q5T0D2|Q5T0D2_HUMAN	UMP-CMP kinase OS=Homo sapiens GN=CMPK1 PE=1 SV=1	HUMAN	3
363	5.68	6.42	25.91	14.63	14.63	sp|Q96D15|RCN3_HUMAN	Reticulocalbin-3 OS=Homo sapiens GN=RCN3 PE=1 SV=1	HUMAN	4
363	0	5.7	47.93	25.44	25.44	tr|M0QZH0|M0QZH0_HUMAN	Reticulocalbin-3 (Fragment) OS=Homo sapiens GN=RCN3 PE=1 SV=1	HUMAN	3
363	0	4.28	24	24	24	tr|M0QYB8|M0QYB8_HUMAN	Reticulocalbin-3 (Fragment) OS=Homo sapiens GN=RCN3 PE=1 SV=1	HUMAN	3
364	5.67	5.68	37.87	25	16.18	sp|P35232|PHB_HUMAN	Prohibitin OS=Homo sapiens GN=PHB PE=1 SV=1	HUMAN	3
364	0	3.55	29.27	21.95	12.2	tr|C9JW96|C9JW96_HUMAN	Prohibitin (Fragment) OS=Homo sapiens GN=PHB PE=1 SV=2	HUMAN	2
365	5.66	5.66	33.46	17.21	10.06	tr|E7EUC7|E7EUC7_HUMAN	UTP--glucose-1-phosphate uridylyltransferase OS=Homo sapiens GN=UGP2 PE=1 SV=1	HUMAN	3
365	0	5.66	34.06	17.52	10.24	tr|A0A087WYS1|A0A087WYS1_HUMAN	UTP--glucose-1-phosphate uridylyltransferase OS=Homo sapiens GN=UGP2 PE=1 SV=1	HUMAN	3
365	0	5.66	34.06	17.52	10.24	sp|Q16851|UGPA_HUMAN	UTP--glucose-1-phosphate uridylyltransferase OS=Homo sapiens GN=UGP2 PE=1 SV=5	HUMAN	3
366	5.65	5.65	9.983	5.122	4.167	sp|P27816|MAP4_HUMAN	Microtubule-associated protein 4 OS=Homo sapiens GN=MAP4 PE=1 SV=3	HUMAN	3
366	0	5.42	7.053	2.569	2.09	tr|E7EVA0|E7EVA0_HUMAN	Microtubule-associated protein OS=Homo sapiens GN=MAP4 PE=1 SV=1	HUMAN	3
367	5.55	5.57	13.31	6.163	2.876	sp|Q15393|SF3B3_HUMAN	Splicing factor 3B subunit 3 OS=Homo sapiens GN=SF3B3 PE=1 SV=4	HUMAN	3
368	5.54	24.9	45.84	42.02	35.96	sp|P68371|TBB4B_HUMAN	Tubulin beta-4B chain OS=Homo sapiens GN=TUBB4B PE=1 SV=1	HUMAN	17
368	0	15.5	37.84	36.49	24.55	sp|P04350|TBB4A_HUMAN	Tubulin beta-4A chain OS=Homo sapiens GN=TUBB4A PE=1 SV=2	HUMAN	12
369	5.51	7.62	34.82	18.47	12.95	sp|P23381|SYWC_HUMAN	Tryptophan--tRNA ligase, cytoplasmic OS=Homo sapiens GN=WARS PE=1 SV=2	HUMAN	4
370	5.5	5.52	10.97	4.638	3.846	tr|E7EUF1|E7EUF1_HUMAN	Ectonucleotide pyrophosphatase/phosphodiesterase family member 2 OS=Homo sapiens GN=ENPP2 PE=1 SV=1	HUMAN	4
370	0	5.52	11.24	4.751	3.94	sp|Q13822|ENPP2_HUMAN	Ectonucleotide pyrophosphatase/phosphodiesterase family member 2 OS=Homo sapiens GN=ENPP2 PE=1 SV=3	HUMAN	4
370	0	4.77	12.85	5.422	4.016	tr|E5RIA2|E5RIA2_HUMAN	Ectonucleotide pyrophosphatase/phosphodiesterase family member 2 OS=Homo sapiens GN=ENPP2 PE=1 SV=1	HUMAN	3
371	5.49	60.6	65.43	55.14	46.45	sp|P04259|K2C6B_HUMAN	Keratin, type II cytoskeletal 6B OS=Homo sapiens GN=KRT6B PE=1 SV=5	HUMAN	41
372	5.48	5.65	17.63	12.08	8.937	sp|P61812|TGFB2_HUMAN	Transforming growth factor beta-2 OS=Homo sapiens GN=TGFB2 PE=1 SV=1	HUMAN	3
373	5.46	5.76	20.43	18.82	11.02	sp|O15143|ARC1B_HUMAN	Actin-related protein 2/3 complex subunit 1B OS=Homo sapiens GN=ARPC1B PE=1 SV=3	HUMAN	3
374	5.44	5.48	18.39	11.99	10.67	sp|P02771|FETA_HUMAN	Alpha-fetoprotein OS=Homo sapiens GN=AFP PE=1 SV=1	HUMAN	6
374	0	5.48	17.04	11.74	10.45	tr|J3KMX3|J3KMX3_HUMAN	Alpha-fetoprotein OS=Homo sapiens GN=AFP PE=1 SV=1	HUMAN	6
375	5.44	5.44	39.68	23.28	15.61	sp|Q16543|CDC37_HUMAN	Hsp90 co-chaperone Cdc37 OS=Homo sapiens GN=CDC37 PE=1 SV=1	HUMAN	4
375	0	3.34	49.13	26.09	13.48	tr|K7EQA9|K7EQA9_HUMAN	Hsp90 co-chaperone Cdc37 (Fragment) OS=Homo sapiens GN=CDC37 PE=1 SV=1	HUMAN	2
376	5.4	5.5	26.16	13.48	6.581	sp|O60506|HNRPQ_HUMAN	Heterogeneous nuclear ribonucleoprotein Q OS=Homo sapiens GN=SYNCRIP PE=1 SV=2	HUMAN	3
376	0	4.2	31.35	24.86	17.84	tr|F6UXX1|F6UXX1_HUMAN	Heterogeneous nuclear ribonucleoprotein Q (Fragment) OS=Homo sapiens GN=SYNCRIP PE=1 SV=1	HUMAN	2
376	0	3.29	30.6	13.58	4.31	tr|B7Z645|B7Z645_HUMAN	Heterogeneous nuclear ribonucleoprotein Q OS=Homo sapiens GN=SYNCRIP PE=1 SV=1	HUMAN	2
377	5.4	5.45	18.23	14.18	12.15	sp|P31153|METK2_HUMAN	S-adenosylmethionine synthase isoform type-2 OS=Homo sapiens GN=MAT2A PE=1 SV=1	HUMAN	4
378	5.4	5.44	27.3	17.51	12.46	sp|P37837|TALDO_HUMAN	Transaldolase OS=Homo sapiens GN=TALDO1 PE=1 SV=2	HUMAN	5
378	0	4.61	22.01	15.72	10.38	tr|F2Z393|F2Z393_HUMAN	Transaldolase OS=Homo sapiens GN=TALDO1 PE=1 SV=1	HUMAN	4
379	5.32	5.43	30.82	21.92	14.73	tr|G3V4C1|G3V4C1_HUMAN	Heterogeneous nuclear ribonucleoproteins C1/C2 OS=Homo sapiens GN=HNRNPC PE=1 SV=1	HUMAN	4
379	0	5.43	29.51	20.98	14.1	tr|G3V2Q1|G3V2Q1_HUMAN	Heterogeneous nuclear ribonucleoproteins C1/C2 OS=Homo sapiens GN=HNRNPC PE=1 SV=1	HUMAN	4
379	0	5.43	31.03	22.07	14.83	tr|B2R5W2|B2R5W2_HUMAN	Heterogeneous nuclear ribonucleoproteins C1/C2 OS=Homo sapiens GN=HNRNPC PE=1 SV=1	HUMAN	4
379	0	5.43	29.41	20.92	14.05	sp|P07910|HNRPC_HUMAN	Heterogeneous nuclear ribonucleoproteins C1/C2 OS=Homo sapiens GN=HNRNPC PE=1 SV=4	HUMAN	4
379	0	5.32	36.8	25.54	18.61	tr|G3V576|G3V576_HUMAN	Heterogeneous nuclear ribonucleoproteins C1/C2 OS=Homo sapiens GN=HNRNPC PE=1 SV=1	HUMAN	4
379	0	5.32	32.44	22.52	16.41	tr|G3V4W0|G3V4W0_HUMAN	Heterogeneous nuclear ribonucleoproteins C1/C2 (Fragment) OS=Homo sapiens GN=HNRNPC PE=1 SV=1	HUMAN	4
379	0	5.32	29.51	20.49	14.93	tr|B4DY08|B4DY08_HUMAN	Heterogeneous nuclear ribonucleoproteins C1/C2 OS=Homo sapiens GN=HNRNPC PE=1 SV=1	HUMAN	4
379	0	5.32	39.04	31.55	22.99	tr|G3V575|G3V575_HUMAN	Heterogeneous nuclear ribonucleoproteins C1/C2 (Fragment) OS=Homo sapiens GN=HNRNPC PE=1 SV=1	HUMAN	4
379	0	5.32	41.71	33.71	24.57	tr|G3V555|G3V555_HUMAN	Heterogeneous nuclear ribonucleoproteins C1/C2 (Fragment) OS=Homo sapiens GN=HNRNPC PE=1 SV=1	HUMAN	4
379	0	4.72	50.79	39.68	26.98	tr|G3V251|G3V251_HUMAN	Heterogeneous nuclear ribonucleoproteins C1/C2 (Fragment) OS=Homo sapiens GN=HNRNPC PE=1 SV=1	HUMAN	3
379	0	4.71	50.43	42.74	29.06	tr|G3V5X6|G3V5X6_HUMAN	Heterogeneous nuclear ribonucleoproteins C1/C2 (Fragment) OS=Homo sapiens GN=HNRNPC PE=1 SV=1	HUMAN	3
379	0	4.71	48.76	41.32	28.1	tr|G3V3K6|G3V3K6_HUMAN	Heterogeneous nuclear ribonucleoproteins C1/C2 (Fragment) OS=Homo sapiens GN=HNRNPC PE=1 SV=1	HUMAN	3
379	0	4.71	40.14	34.01	23.13	tr|B4DSU6|B4DSU6_HUMAN	Heterogeneous nuclear ribonucleoproteins C1/C2 OS=Homo sapiens GN=HNRNPC PE=1 SV=1	HUMAN	3
379	0	4.62	65.15	51.52	51.52	tr|G3V4M8|G3V4M8_HUMAN	Heterogeneous nuclear ribonucleoproteins C1/C2 (Fragment) OS=Homo sapiens GN=HNRNPC PE=1 SV=1	HUMAN	3
379	0	3.32	59.26	42.59	42.59	tr|G3V2H6|G3V2H6_HUMAN	Heterogeneous nuclear ribonucleoproteins C1/C2 (Fragment) OS=Homo sapiens GN=HNRNPC PE=1 SV=1	HUMAN	2
380	5.3	5.3	10.54	5.202	3.491	sp|Q92859|NEO1_HUMAN	Neogenin OS=Homo sapiens GN=NEO1 PE=1 SV=2	HUMAN	3
381	5.17	6.74	26.93	16.57	11.11	sp|P40227|TCPZ_HUMAN	T-complex protein 1 subunit zeta OS=Homo sapiens GN=CCT6A PE=1 SV=3	HUMAN	4
382	5.17	5.17	20.82	14.2	11.99	sp|P63244|GBLP_HUMAN	Guanine nucleotide-binding protein subunit beta-2-like 1 OS=Homo sapiens GN=GNB2L1 PE=1 SV=3	HUMAN	3
382	0.01	4.25	19.71	12.77	10.22	tr|H0Y8W2|H0Y8W2_HUMAN	Guanine nucleotide-binding protein subunit beta-2-like 1 (Fragment) OS=Homo sapiens GN=GNB2L1 PE=1 SV=1	HUMAN	2
382	0	4.25	20.51	12.82	10.26	tr|J3KPE3|J3KPE3_HUMAN	Guanine nucleotide-binding protein subunit beta-2-like 1 OS=Homo sapiens GN=GNB2L1 PE=1 SV=1	HUMAN	2
382	0	4.25	28.28	17.68	14.14	tr|H0YAF8|H0YAF8_HUMAN	Guanine nucleotide-binding protein subunit beta-2-like 1 (Fragment) OS=Homo sapiens GN=GNB2L1 PE=1 SV=1	HUMAN	2
382	0	4.23	19.03	14.17	11.34	tr|H0YAM7|H0YAM7_HUMAN	Guanine nucleotide-binding protein subunit beta-2-like 1 (Fragment) OS=Homo sapiens GN=GNB2L1 PE=1 SV=1	HUMAN	2
382	0	3.05	20.07	12.27	9.665	tr|D6RAC2|D6RAC2_HUMAN	Guanine nucleotide-binding protein subunit beta-2-like 1 OS=Homo sapiens GN=GNB2L1 PE=1 SV=1	HUMAN	2
383	5.16	16.01	19.36	12.99	8.146	sp|P06737|PYGL_HUMAN	Glycogen phosphorylase, liver form OS=Homo sapiens GN=PYGL PE=1 SV=4	HUMAN	9
383	0	16.01	18.19	13.43	8.425	tr|E9PK47|E9PK47_HUMAN	Alpha-1,4 glucan phosphorylase OS=Homo sapiens GN=PYGL PE=1 SV=1	HUMAN	9
384	5.15	5.15	35.07	26.49	20.15	sp|Q15691|MARE1_HUMAN	Microtubule-associated protein RP/EB family member 1 OS=Homo sapiens GN=MAPRE1 PE=1 SV=3	HUMAN	3
385	5.14	5.14	37.68	16.91	11.59	sp|P01033|TIMP1_HUMAN	Metalloproteinase inhibitor 1 OS=Homo sapiens GN=TIMP1 PE=1 SV=1	HUMAN	4
385	0	5.14	40.56	24.48	16.78	tr|Q5H9A7|Q5H9A7_HUMAN	Metalloproteinase inhibitor 1 OS=Homo sapiens GN=TIMP1 PE=1 SV=1	HUMAN	4
385	0	4	37.5	11.03	11.03	tr|Q5H9B5|Q5H9B5_HUMAN	Metalloproteinase inhibitor 1 OS=Homo sapiens GN=TIMP1 PE=1 SV=1	HUMAN	3
385	0	4	36.84	15.79	15.79	tr|Q5H9B4|Q5H9B4_HUMAN	Metalloproteinase inhibitor 1 (Fragment) OS=Homo sapiens GN=TIMP1 PE=1 SV=4	HUMAN	3
386	5.12	5.19	17.03	9.091	5.483	sp|Q08188|TGM3_HUMAN	Protein-glutamine gamma-glutamyltransferase E OS=Homo sapiens GN=TGM3 PE=1 SV=4	HUMAN	3
387	5.09	5.09	38.17	23.65	19.5	sp|P20618|PSB1_HUMAN	Proteasome subunit beta type-1 OS=Homo sapiens GN=PSMB1 PE=1 SV=2	HUMAN	4
388	5.07	5.07	41.38	19.31	19.31	sp|P39019|RS19_HUMAN	40S ribosomal protein S19 OS=Homo sapiens GN=RPS19 PE=1 SV=2	HUMAN	4
388	0	3.33	22.55	17.65	17.65	tr|M0R140|M0R140_HUMAN	40S ribosomal protein S19 (Fragment) OS=Homo sapiens GN=RPS19 PE=1 SV=1	HUMAN	2
388	0	3.33	30.26	23.68	23.68	tr|M0QXK4|M0QXK4_HUMAN	40S ribosomal protein S19 (Fragment) OS=Homo sapiens GN=RPS19 PE=1 SV=1	HUMAN	2
388	0	3.33	25.35	25.35	25.35	tr|M0R2L9|M0R2L9_HUMAN	40S ribosomal protein S19 (Fragment) OS=Homo sapiens GN=RPS19 PE=1 SV=1	HUMAN	2
388	0	3.33	18	18	18	tr|M0QYF7|M0QYF7_HUMAN	40S ribosomal protein S19 (Fragment) OS=Homo sapiens GN=RPS19 PE=1 SV=1	HUMAN	2
389	5.02	5.02	9.033	8.716	8.716	tr|J3KPF3|J3KPF3_HUMAN	4F2 cell-surface antigen heavy chain OS=Homo sapiens GN=SLC3A2 PE=1 SV=1	HUMAN	4
389	0	5.02	9.516	9.182	9.182	tr|F5GZS6|F5GZS6_HUMAN	4F2 cell-surface antigen heavy chain OS=Homo sapiens GN=SLC3A2 PE=1 SV=1	HUMAN	4
389	0	5.02	9.048	8.73	8.73	sp|P08195|4F2_HUMAN	4F2 cell-surface antigen heavy chain OS=Homo sapiens GN=SLC3A2 PE=1 SV=3	HUMAN	4
390	5	5	31.09	31.09	25.21	sp|P60866|RS20_HUMAN	40S ribosomal protein S20 OS=Homo sapiens GN=RPS20 PE=1 SV=1	HUMAN	4
390	0	3.51	40.98	40.98	29.51	tr|E5RJX2|E5RJX2_HUMAN	40S ribosomal protein S20 OS=Homo sapiens GN=RPS20 PE=1 SV=1	HUMAN	3
390	0	3.51	54.35	54.35	39.13	tr|E5RIP1|E5RIP1_HUMAN	40S ribosomal protein S20 OS=Homo sapiens GN=RPS20 PE=1 SV=1	HUMAN	3
391	4.97	78.55	37.82	27.36	24.63	sp|Q9UKX2|MYH2_HUMAN	Myosin-2 OS=Homo sapiens GN=MYH2 PE=1 SV=1	HUMAN	44
392	4.96	4.98	11.78	3.237	1.928	tr|A8MX12|A8MX12_HUMAN	Myomesin-1 OS=Homo sapiens GN=MYOM1 PE=1 SV=3	HUMAN	3
392	0	4.98	10.15	2.789	1.662	sp|P52179|MYOM1_HUMAN	Myomesin-1 OS=Homo sapiens GN=MYOM1 PE=1 SV=2	HUMAN	3
393	4.96	4.96	29.68	14.71	10.47	sp|Q8NBJ4|GOLM1_HUMAN	Golgi membrane protein 1 OS=Homo sapiens GN=GOLM1 PE=1 SV=1	HUMAN	3
394	4.93	4.93	17.2	17.2	15.05	tr|I3L504|I3L504_HUMAN	Eukaryotic translation initiation factor 5A-1 OS=Homo sapiens GN=EIF5A PE=1 SV=1	HUMAN	4
394	0	4.93	21.92	21.92	19.18	tr|I3L397|I3L397_HUMAN	Eukaryotic translation initiation factor 5A (Fragment) OS=Homo sapiens GN=EIF5A PE=1 SV=4	HUMAN	4
394	0	4.93	20.78	20.78	18.18	sp|Q6IS14|IF5AL_HUMAN	Eukaryotic translation initiation factor 5A-1-like OS=Homo sapiens GN=EIF5AL1 PE=2 SV=2	HUMAN	4
394	0	4.93	20.78	20.78	18.18	sp|P63241|IF5A1_HUMAN	Eukaryotic translation initiation factor 5A-1 OS=Homo sapiens GN=EIF5A PE=1 SV=2	HUMAN	4
394	0	4.21	19.05	19.05	19.05	tr|F8WCJ1|F8WCJ1_HUMAN	Eukaryotic translation initiation factor 5A OS=Homo sapiens GN=EIF5A2 PE=1 SV=1	HUMAN	3
394	0	4.21	18.35	18.35	18.35	tr|C9J7B5|C9J7B5_HUMAN	Eukaryotic translation initiation factor 5A OS=Homo sapiens GN=EIF5A2 PE=1 SV=1	HUMAN	3
394	0	4.21	17.39	17.39	17.39	tr|C9J4W5|C9J4W5_HUMAN	Eukaryotic translation initiation factor 5A (Fragment) OS=Homo sapiens GN=EIF5A2 PE=1 SV=1	HUMAN	3
394	0	4.21	13.07	13.07	13.07	sp|Q9GZV4|IF5A2_HUMAN	Eukaryotic translation initiation factor 5A-2 OS=Homo sapiens GN=EIF5A2 PE=1 SV=3	HUMAN	3
395	4.87	4.87	10.86	5.481	4.343	sp|Q9UHI8|ATS1_HUMAN	A disintegrin and metalloproteinase with thrombospondin motifs 1 OS=Homo sapiens GN=ADAMTS1 PE=1 SV=4	HUMAN	3
396	4.85	4.96	25.66	19.58	15.08	sp|P51991|ROA3_HUMAN	Heterogeneous nuclear ribonucleoprotein A3 OS=Homo sapiens GN=HNRNPA3 PE=1 SV=2	HUMAN	4
397	4.83	4.83	16.59	9.698	9.698	tr|A0A087X010|A0A087X010_HUMAN	Ig gamma-1 chain C region OS=Homo sapiens GN=IGHG1 PE=1 SV=1	HUMAN	3
397	0	4.83	14.95	9.474	9.474	tr|A0A087WYE1|A0A087WYE1_HUMAN	Ig gamma-1 chain C region OS=Homo sapiens GN=IGHG1 PE=1 SV=1	HUMAN	3
397	0	4.83	15.24	9.657	9.657	tr|A0A087WV47|A0A087WV47_HUMAN	Ig gamma-1 chain C region OS=Homo sapiens GN=IGHG1 PE=1 SV=1	HUMAN	3
397	0	2.75	12.9	6.131	6.131	tr|A0A087X079|A0A087X079_HUMAN	Ig gamma-1 chain C region OS=Homo sapiens GN=IGHG1 PE=1 SV=1	HUMAN	2
398	4.82	4.82	19.42	19.42	16.12	sp|P31944|CASPE_HUMAN	Caspase-14 OS=Homo sapiens GN=CASP14 PE=1 SV=2	HUMAN	3
399	4.8	4.8	60	53.04	53.04	sp|P05387|RLA2_HUMAN	60S acidic ribosomal protein P2 OS=Homo sapiens GN=RPLP2 PE=1 SV=1	HUMAN	3
399	0	3.35	57.61	48.91	48.91	tr|H0YDD8|H0YDD8_HUMAN	60S acidic ribosomal protein P2 (Fragment) OS=Homo sapiens GN=RPLP2 PE=1 SV=1	HUMAN	2
400	4.73	4.73	19.17	12.92	12.92	sp|P24592|IBP6_HUMAN	Insulin-like growth factor-binding protein 6 OS=Homo sapiens GN=IGFBP6 PE=1 SV=1	HUMAN	4
400	0	2.66	8.824	8.824	8.824	tr|F8VYK9|F8VYK9_HUMAN	Insulin-like growth factor-binding protein 6 OS=Homo sapiens GN=IGFBP6 PE=1 SV=1	HUMAN	2
401	4.71	4.71	29	20	16.5	sp|P61026|RAB10_HUMAN	Ras-related protein Rab-10 OS=Homo sapiens GN=RAB10 PE=1 SV=1	HUMAN	3
402	4.7	17	29.42	20.88	12.69	sp|P11216|PYGB_HUMAN	Glycogen phosphorylase, brain form OS=Homo sapiens GN=PYGB PE=1 SV=5	HUMAN	11
403	4.7	4.7	16.1	8.048	8.048	sp|Q8IXL6|DMP4_HUMAN	Extracellular serine/threonine protein kinase FAM20C OS=Homo sapiens GN=FAM20C PE=1 SV=2	HUMAN	3
404	4.69	4.78	32.88	21.92	21.92	sp|P12273|PIP_HUMAN	Prolactin-inducible protein OS=Homo sapiens GN=PIP PE=1 SV=1	HUMAN	3
405	4.69	4.69	25.1	21.34	17.15	sp|P28072|PSB6_HUMAN	Proteasome subunit beta type-6 OS=Homo sapiens GN=PSMB6 PE=1 SV=4	HUMAN	4
406	4.65	4.68	36.95	18.88	13.25	sp|Q06323|PSME1_HUMAN	Proteasome activator complex subunit 1 OS=Homo sapiens GN=PSME1 PE=1 SV=1	HUMAN	4
407	4.64	4.64	22.22	15.33	11.88	sp|P25789|PSA4_HUMAN	Proteasome subunit alpha type-4 OS=Homo sapiens GN=PSMA4 PE=1 SV=1	HUMAN	3
407	0	4.63	23.18	18.18	14.09	tr|H0YMZ1|H0YMZ1_HUMAN	Proteasome subunit alpha type (Fragment) OS=Homo sapiens GN=PSMA4 PE=1 SV=4	HUMAN	3
407	0	4.63	21.61	16.95	13.14	tr|H0YL69|H0YL69_HUMAN	Proteasome subunit alpha type (Fragment) OS=Homo sapiens GN=PSMA4 PE=1 SV=1	HUMAN	3
407	0	4.31	21.3	13.48	13.48	tr|H0YN18|H0YN18_HUMAN	Proteasome subunit alpha type-4 OS=Homo sapiens GN=PSMA4 PE=1 SV=1	HUMAN	3
407	0	3.05	20.77	14.75	9.836	tr|H0YMI6|H0YMI6_HUMAN	Proteasome subunit alpha type (Fragment) OS=Homo sapiens GN=PSMA4 PE=1 SV=1	HUMAN	2
407	0	3.05	18.18	12.92	8.612	tr|H0YMA1|H0YMA1_HUMAN	Proteasome subunit alpha type (Fragment) OS=Homo sapiens GN=PSMA4 PE=1 SV=1	HUMAN	2
407	0	2.75	16.02	9.945	9.945	tr|H0YKT8|H0YKT8_HUMAN	Proteasome subunit beta type (Fragment) OS=Homo sapiens GN=PSMA4 PE=1 SV=4	HUMAN	2
408	4.63	4.63	23.05	12.77	10.64	tr|A0A0A0MR02|A0A0A0MR02_HUMAN	Voltage-dependent anion-selective channel protein 2 (Fragment) OS=Homo sapiens GN=VDAC2 PE=1 SV=1	HUMAN	3
408	0	4.63	22.11	12.24	10.2	sp|P45880|VDAC2_HUMAN	Voltage-dependent anion-selective channel protein 2 OS=Homo sapiens GN=VDAC2 PE=1 SV=2	HUMAN	3
409	4.6	4.6	14.94	5.535	5.535	sp|O95394|AGM1_HUMAN	Phosphoacetylglucosamine mutase OS=Homo sapiens GN=PGM3 PE=1 SV=1	HUMAN	3
410	4.6	4.6	29.79	17.7	15.34	sp|P07858|CATB_HUMAN	Cathepsin B OS=Homo sapiens GN=CTSB PE=1 SV=3	HUMAN	4
411	4.58	4.58	40	36.97	32.73	sp|P30050|RL12_HUMAN	60S ribosomal protein L12 OS=Homo sapiens GN=RPL12 PE=1 SV=1	HUMAN	4
412	4.51	4.52	14.42	4.848	4.848	sp|Q00839|HNRPU_HUMAN	Heterogeneous nuclear ribonucleoprotein U OS=Homo sapiens GN=HNRNPU PE=1 SV=6	HUMAN	3
413	4.45	4.45	25.47	17.99	8.178	sp|Q13838|DX39B_HUMAN	Spliceosome RNA helicase DDX39B OS=Homo sapiens GN=DDX39B PE=1 SV=1	HUMAN	3
413	0	3.78	22.35	14.82	4.941	tr|Q5STU3|Q5STU3_HUMAN	Spliceosome RNA helicase DDX39B OS=Homo sapiens GN=DDX39B PE=1 SV=2	HUMAN	2
414	4.44	4.45	69.3	37.72	31.58	sp|P06702|S10A9_HUMAN	Protein S100-A9 OS=Homo sapiens GN=S100A9 PE=1 SV=1	HUMAN	3
415	4.44	4.44	5.818	3.293	2.195	sp|P19827|ITIH1_HUMAN	Inter-alpha-trypsin inhibitor heavy chain H1 OS=Homo sapiens GN=ITIH1 PE=1 SV=3	HUMAN	3
415	0	4	14.55	6.103	6.103	tr|F8WAS2|F8WAS2_HUMAN	Inter-alpha-trypsin inhibitor heavy chain H1 OS=Homo sapiens GN=ITIH1 PE=1 SV=1	HUMAN	2
416	4.41	4.41	20.3	4.175	4.175	tr|H3BPE7|H3BPE7_HUMAN	RNA-binding protein FUS OS=Homo sapiens GN=FUS PE=1 SV=1	HUMAN	3
416	0.02	2.26	6.682	6.682	4.454	tr|A0A075B7D9|A0A075B7D9_HUMAN	TATA-binding protein-associated factor 2N OS=Homo sapiens GN=TAF15 PE=1 SV=1	HUMAN	2
416	0.02	2.26	5.068	5.068	3.378	sp|Q92804|RBP56_HUMAN	TATA-binding protein-associated factor 2N OS=Homo sapiens GN=TAF15 PE=1 SV=1	HUMAN	2
416	0	4.41	20.34	4.183	4.183	sp|P35637|FUS_HUMAN	RNA-binding protein FUS OS=Homo sapiens GN=FUS PE=1 SV=1	HUMAN	3
417	4.4	4.4	35.45	35.45	22.73	sp|P81605|DCD_HUMAN	Dermcidin OS=Homo sapiens GN=DCD PE=1 SV=2	HUMAN	2
418	4.38	4.38	34.3	22.71	14.49	sp|P51149|RAB7A_HUMAN	Ras-related protein Rab-7a OS=Homo sapiens GN=RAB7A PE=1 SV=1	HUMAN	2
419	4.34	4.34	19.92	17.19	14.45	sp|P30048|PRDX3_HUMAN	Thioredoxin-dependent peroxide reductase, mitochondrial OS=Homo sapiens GN=PRDX3 PE=1 SV=3	HUMAN	3
420	4.33	4.39	44.78	38.31	22.39	sp|P49721|PSB2_HUMAN	Proteasome subunit beta type-2 OS=Homo sapiens GN=PSMB2 PE=1 SV=1	HUMAN	3
421	4.32	4.32	26.89	17.42	14.02	sp|P28070|PSB4_HUMAN	Proteasome subunit beta type-4 OS=Homo sapiens GN=PSMB4 PE=1 SV=4	HUMAN	4
422	4.3	4.3	15	10.74	6.912	tr|A0A087WXE9|A0A087WXE9_HUMAN	Inactive serine protease PAMR1 OS=Homo sapiens GN=PAMR1 PE=1 SV=1	HUMAN	3
422	0	4.3	14.17	10.14	6.528	sp|Q6UXH9|PAMR1_HUMAN	Inactive serine protease PAMR1 OS=Homo sapiens GN=PAMR1 PE=1 SV=1	HUMAN	3
422	0	4.28	20.67	14.9	11.3	tr|A0A087WUR8|A0A087WUR8_HUMAN	Inactive serine protease PAMR1 OS=Homo sapiens GN=PAMR1 PE=1 SV=1	HUMAN	3
422	0	2.97	11.85	9.333	5.481	tr|E9PQ70|E9PQ70_HUMAN	Inactive serine protease PAMR1 (Fragment) OS=Homo sapiens GN=PAMR1 PE=1 SV=1	HUMAN	2
423	4.3	4.3	5.606	4.005	3.089	sp|Q9Y678|COPG1_HUMAN	Coatomer subunit gamma-1 OS=Homo sapiens GN=COPG1 PE=1 SV=1	HUMAN	2
424	4.27	6.49	60.08	32.35	22.27	tr|B7Z6Z4|B7Z6Z4_HUMAN	Myosin light polypeptide 6 OS=Homo sapiens GN=MYL6 PE=1 SV=1	HUMAN	5
424	0	6.49	69.74	50.66	34.87	tr|J3KND3|J3KND3_HUMAN	Myosin light polypeptide 6 OS=Homo sapiens GN=MYL6 PE=1 SV=1	HUMAN	5
424	0	6.49	69.74	50.66	34.87	tr|G8JLA2|G8JLA2_HUMAN	Myosin light polypeptide 6 OS=Homo sapiens GN=MYL6 PE=1 SV=1	HUMAN	5
424	0	6.49	47.83	47.83	32.92	tr|G3V1V0|G3V1V0_HUMAN	Myosin light polypeptide 6 OS=Homo sapiens GN=MYL6 PE=1 SV=1	HUMAN	5
424	0	6.49	53.1	53.1	36.55	tr|F8W1R7|F8W1R7_HUMAN	Myosin light polypeptide 6 OS=Homo sapiens GN=MYL6 PE=1 SV=1	HUMAN	5
424	0	6.49	50.99	50.99	35.1	sp|P60660|MYL6_HUMAN	Myosin light polypeptide 6 OS=Homo sapiens GN=MYL6 PE=1 SV=2	HUMAN	5
424	0	6.44	53.08	53.08	40.77	tr|F8VPF3|F8VPF3_HUMAN	Myosin light polypeptide 6 (Fragment) OS=Homo sapiens GN=MYL6 PE=1 SV=1	HUMAN	5
424	0	4.92	55.65	55.65	34.78	tr|G3V1Y7|G3V1Y7_HUMAN	Myosin light polypeptide 6 OS=Homo sapiens GN=MYL6 PE=1 SV=1	HUMAN	4
424	0	4.87	47.45	28.57	20.41	tr|F8W180|F8W180_HUMAN	Myosin light polypeptide 6 OS=Homo sapiens GN=MYL6 PE=1 SV=1	HUMAN	4
424	0	4.87	54.37	54.37	38.83	tr|F8VZU9|F8VZU9_HUMAN	Myosin light polypeptide 6 OS=Homo sapiens GN=MYL6 PE=1 SV=1	HUMAN	4
424	0	4.82	48.19	48.19	48.19	tr|H0YI43|H0YI43_HUMAN	Myosin light polypeptide 6 (Fragment) OS=Homo sapiens GN=MYL6 PE=1 SV=1	HUMAN	4
425	4.26	5.76	6.818	4.283	2.01	sp|Q16706|MA2A1_HUMAN	Alpha-mannosidase 2 OS=Homo sapiens GN=MAN2A1 PE=1 SV=2	HUMAN	3
426	4.24	8.58	35.61	25.96	15.96	sp|Q14195|DPYL3_HUMAN	Dihydropyrimidinase-related protein 3 OS=Homo sapiens GN=DPYSL3 PE=1 SV=1	HUMAN	7
427	4.22	4.22	17.8	8.263	6.992	tr|G8JLB6|G8JLB6_HUMAN	Heterogeneous nuclear ribonucleoprotein H OS=Homo sapiens GN=HNRNPH1 PE=1 SV=1	HUMAN	2
427	0	4.22	19.58	9.091	7.692	tr|E9PCY7|E9PCY7_HUMAN	Heterogeneous nuclear ribonucleoprotein H OS=Homo sapiens GN=HNRNPH1 PE=1 SV=1	HUMAN	2
427	0	4.22	18.71	8.686	7.35	sp|P31943|HNRH1_HUMAN	Heterogeneous nuclear ribonucleoprotein H OS=Homo sapiens GN=HNRNPH1 PE=1 SV=4	HUMAN	2
427	0	4.2	23.61	8.686	7.35	sp|P55795|HNRH2_HUMAN	Heterogeneous nuclear ribonucleoprotein H2 OS=Homo sapiens GN=HNRNPH2 PE=1 SV=1	HUMAN	2
427	0	4.19	29.25	18.4	15.57	tr|D6RBM0|D6RBM0_HUMAN	Heterogeneous nuclear ribonucleoprotein H (Fragment) OS=Homo sapiens GN=HNRNPH1 PE=1 SV=1	HUMAN	2
427	0	4.16	25.16	25.16	21.29	tr|E5RGV0|E5RGV0_HUMAN	Heterogeneous nuclear ribonucleoprotein H (Fragment) OS=Homo sapiens GN=HNRNPH1 PE=1 SV=1	HUMAN	2
427	0	4.03	26.19	19.64	19.64	tr|D6RIU0|D6RIU0_HUMAN	Heterogeneous nuclear ribonucleoprotein H (Fragment) OS=Homo sapiens GN=HNRNPH1 PE=1 SV=1	HUMAN	2
427	0	4.03	39	33	33	tr|E5RGH4|E5RGH4_HUMAN	Heterogeneous nuclear ribonucleoprotein H (Fragment) OS=Homo sapiens GN=HNRNPH1 PE=1 SV=1	HUMAN	2
428	4.2	4.2	7.37	2.975	1.826	sp|Q9UBG0|MRC2_HUMAN	C-type mannose receptor 2 OS=Homo sapiens GN=MRC2 PE=1 SV=2	HUMAN	2
429	4.19	10.86	57.23	54.22	44.58	sp|Q9Y281|COF2_HUMAN	Cofilin-2 OS=Homo sapiens GN=CFL2 PE=1 SV=1	HUMAN	7
429	0	2.22	48.28	48.28	20.69	tr|F8WDN3|F8WDN3_HUMAN	Cofilin-2 OS=Homo sapiens GN=CFL2 PE=1 SV=1	HUMAN	1
430	4.19	4.19	21.47	21.47	15.71	sp|P60953|CDC42_HUMAN	Cell division control protein 42 homolog OS=Homo sapiens GN=CDC42 PE=1 SV=2	HUMAN	2
431	4.18	4.18	21.81	12.75	10.2	sp|P01876|IGHA1_HUMAN	Ig alpha-1 chain C region OS=Homo sapiens GN=IGHA1 PE=1 SV=2	HUMAN	4
431	0	4.04	15.59	10.59	10.59	sp|P01877|IGHA2_HUMAN	Ig alpha-2 chain C region OS=Homo sapiens GN=IGHA2 PE=1 SV=3	HUMAN	4
432	4.17	4.17	9.238	8.104	8.104	sp|P38606|VATA_HUMAN	V-type proton ATPase catalytic subunit A OS=Homo sapiens GN=ATP6V1A PE=1 SV=2	HUMAN	3
432	0	1.94	13.57	13.57	13.57	tr|C9JVW8|C9JVW8_HUMAN	V-type proton ATPase catalytic subunit A (Fragment) OS=Homo sapiens GN=ATP6V1A PE=1 SV=1	HUMAN	2
432	0	1.94	16.3	16.3	16.3	tr|C9JA17|C9JA17_HUMAN	V-type proton ATPase catalytic subunit A (Fragment) OS=Homo sapiens GN=ATP6V1A PE=1 SV=4	HUMAN	2
433	4.14	4.14	22.41	22.41	22.41	sp|Q9Y5S9|RBM8A_HUMAN	RNA-binding protein 8A OS=Homo sapiens GN=RBM8A PE=1 SV=1	HUMAN	3
434	4.13	4.14	14.83	4.802	3.107	tr|E7ER44|E7ER44_HUMAN	Lactotransferrin OS=Homo sapiens GN=LTF PE=1 SV=1	HUMAN	2
434	0	4.14	15.09	4.885	3.161	tr|E7EQB2|E7EQB2_HUMAN	Lactotransferrin (Fragment) OS=Homo sapiens GN=LTF PE=1 SV=1	HUMAN	2
434	0	4.14	14.79	4.789	3.099	sp|P02788|TRFL_HUMAN	Lactotransferrin OS=Homo sapiens GN=LTF PE=1 SV=6	HUMAN	2
435	4.1	4.1	14.54	8.17	8.17	sp|Q96G03|PGM2_HUMAN	Phosphoglucomutase-2 OS=Homo sapiens GN=PGM2 PE=1 SV=4	HUMAN	4
436	4.09	4.09	19.27	10.32	8.257	tr|E9PRU1|E9PRU1_HUMAN	EGF-containing fibulin-like extracellular matrix protein 2 OS=Homo sapiens GN=EFEMP2 PE=1 SV=1	HUMAN	2
436	0	4.09	17.16	10.16	8.126	sp|O95967|FBLN4_HUMAN	EGF-containing fibulin-like extracellular matrix protein 2 OS=Homo sapiens GN=EFEMP2 PE=1 SV=3	HUMAN	2
436	0	4.09	33.52	24.73	19.78	tr|H0YET5|H0YET5_HUMAN	EGF-containing fibulin-like extracellular matrix protein 2 (Fragment) OS=Homo sapiens GN=EFEMP2 PE=1 SV=1	HUMAN	2
436	0	4	59.46	48.65	48.65	tr|H0YEU0|H0YEU0_HUMAN	EGF-containing fibulin-like extracellular matrix protein 2 (Fragment) OS=Homo sapiens GN=EFEMP2 PE=1 SV=1	HUMAN	2
436	0	4	47.37	47.37	47.37	tr|E9PI47|E9PI47_HUMAN	EGF-containing fibulin-like extracellular matrix protein 2 (Fragment) OS=Homo sapiens GN=EFEMP2 PE=1 SV=1	HUMAN	2
437	4.09	4.09	29.47	18.95	13.68	tr|J3QQ67|J3QQ67_HUMAN	60S ribosomal protein L18 (Fragment) OS=Homo sapiens GN=RPL18 PE=1 SV=1	HUMAN	2
437	0	4.09	33.53	21.56	15.57	tr|H0YHA7|H0YHA7_HUMAN	60S ribosomal protein L18 (Fragment) OS=Homo sapiens GN=RPL18 PE=1 SV=1	HUMAN	2
437	0	4.09	43.08	27.69	20	tr|F8VUA6|F8VUA6_HUMAN	60S ribosomal protein L18 (Fragment) OS=Homo sapiens GN=RPL18 PE=1 SV=1	HUMAN	2
437	0	4.09	29.79	19.15	13.83	sp|Q07020|RL18_HUMAN	60S ribosomal protein L18 OS=Homo sapiens GN=RPL18 PE=1 SV=2	HUMAN	2
437	0	4.09	31.1	21.95	15.85	tr|G3V203|G3V203_HUMAN	60S ribosomal protein L18 OS=Homo sapiens GN=RPL18 PE=1 SV=1	HUMAN	2
437	0	2.14	21.05	17.29	9.774	tr|F8VYV2|F8VYV2_HUMAN	60S ribosomal protein L18 OS=Homo sapiens GN=RPL18 PE=1 SV=1	HUMAN	1
437	0	2.14	16.67	16.67	9.42	tr|A0A075B7A0|A0A075B7A0_HUMAN	60S ribosomal protein L18 OS=Homo sapiens GN=RPL18 PE=1 SV=1	HUMAN	1
438	4.09	4.09	32.6	25.99	15.42	sp|P80723|BASP1_HUMAN	Brain acid soluble protein 1 OS=Homo sapiens GN=BASP1 PE=1 SV=2	HUMAN	2
439	4.08	4.08	17.19	9.927	7.99	sp|P17174|AATC_HUMAN	Aspartate aminotransferase, cytoplasmic OS=Homo sapiens GN=GOT1 PE=1 SV=3	HUMAN	2
440	4.07	6.9	11.79	6.935	5.964	tr|B1AHL2|B1AHL2_HUMAN	Fibulin-1 OS=Homo sapiens GN=FBLN1 PE=1 SV=1	HUMAN	4
441	4.06	4.06	12.14	6.408	6.408	sp|P28799|GRN_HUMAN	Granulins OS=Homo sapiens GN=GRN PE=1 SV=2	HUMAN	3
441	0	4.04	13.92	9.794	9.794	tr|K7EKL3|K7EKL3_HUMAN	Granulins (Fragment) OS=Homo sapiens GN=GRN PE=1 SV=1	HUMAN	3
441	0	3.49	11.93	6.422	6.422	tr|K7EQ05|K7EQ05_HUMAN	Granulins OS=Homo sapiens GN=GRN PE=1 SV=1	HUMAN	2
442	4.06	4.06	18.75	12.98	12.98	sp|Q96DA0|ZG16B_HUMAN	Zymogen granule protein 16 homolog B OS=Homo sapiens GN=ZG16B PE=1 SV=3	HUMAN	3
443	4.05	4.06	9.967	3.286	2.519	sp|Q99613|EIF3C_HUMAN	Eukaryotic translation initiation factor 3 subunit C OS=Homo sapiens GN=EIF3C PE=1 SV=1	HUMAN	2
443	0	4.06	9.956	3.282	2.516	sp|B5ME19|EIFCL_HUMAN	Eukaryotic translation initiation factor 3 subunit C-like protein OS=Homo sapiens GN=EIF3CL PE=3 SV=1	HUMAN	2
444	4.05	4.05	19.39	14.85	14.85	tr|A0A087WZV1|A0A087WZV1_HUMAN	Heterogeneous nuclear ribonucleoprotein A/B OS=Homo sapiens GN=HNRNPAB PE=1 SV=1	HUMAN	4
444	0	4.05	19.79	17.31	17.31	tr|D6RD18|D6RD18_HUMAN	Heterogeneous nuclear ribonucleoprotein A/B OS=Homo sapiens GN=HNRNPAB PE=1 SV=1	HUMAN	4
444	0	4.05	17.13	14.98	14.98	tr|D6RBZ0|D6RBZ0_HUMAN	Heterogeneous nuclear ribonucleoprotein A/B OS=Homo sapiens GN=HNRNPAB PE=1 SV=1	HUMAN	4
444	0	4.05	20	17.5	17.5	tr|D6R9P3|D6R9P3_HUMAN	Heterogeneous nuclear ribonucleoprotein A/B OS=Homo sapiens GN=HNRNPAB PE=1 SV=1	HUMAN	4
444	0	4.05	16.87	14.76	14.76	sp|Q99729|ROAA_HUMAN	Heterogeneous nuclear ribonucleoprotein A/B OS=Homo sapiens GN=HNRNPAB PE=1 SV=2	HUMAN	4
445	4.04	4.09	4.788	1.105	0.4144	tr|A0A087WTM7|A0A087WTM7_HUMAN	Apolipoprotein B-100 OS=Homo sapiens GN=APOB PE=1 SV=1	HUMAN	2
445	0	4.08	4.69	1.052	0.3945	sp|P04114|APOB_HUMAN	Apolipoprotein B-100 OS=Homo sapiens GN=APOB PE=1 SV=2	HUMAN	2
446	4.04	4.04	17.57	6.508	6.508	sp|P13489|RINI_HUMAN	Ribonuclease inhibitor OS=Homo sapiens GN=RNH1 PE=1 SV=2	HUMAN	2
447	4.03	6.04	44.16	27.92	27.92	sp|P68036|UB2L3_HUMAN	Ubiquitin-conjugating enzyme E2 L3 OS=Homo sapiens GN=UBE2L3 PE=1 SV=1	HUMAN	3
448	4.03	4.06	21.16	7.826	7.826	tr|F8W914|F8W914_HUMAN	Reticulon OS=Homo sapiens GN=RTN4 PE=1 SV=1	HUMAN	2
448	0	4.06	5.956	2.265	2.265	sp|Q9NQC3|RTN4_HUMAN	Reticulon-4 OS=Homo sapiens GN=RTN4 PE=1 SV=2	HUMAN	2
449	4.03	4.03	14.68	11.14	8.861	tr|A0A087X1N8|A0A087X1N8_HUMAN	Serpin B6 OS=Homo sapiens GN=SERPINB6 PE=1 SV=1	HUMAN	2
449	0	4.03	15.26	11.58	9.211	tr|A0A024QZX5|A0A024QZX5_HUMAN	Serpin B6 OS=Homo sapiens GN=SERPINB6 PE=1 SV=1	HUMAN	2
449	0	4.03	15.43	11.7	9.309	sp|P35237|SPB6_HUMAN	Serpin B6 OS=Homo sapiens GN=SERPINB6 PE=1 SV=3	HUMAN	2
450	4.02	4.02	10.23	0.6162	0.4621	sp|Q07954|LRP1_HUMAN	Prolow-density lipoprotein receptor-related protein 1 OS=Homo sapiens GN=LRP1 PE=1 SV=2	HUMAN	2
451	4.02	4.02	3.461	1.014	1.014	sp|P01031|CO5_HUMAN	Complement C5 OS=Homo sapiens GN=C5 PE=1 SV=4	HUMAN	2
452	4	4.06	2.647	2.647	1.961	tr|F5H2F4|F5H2F4_HUMAN	C-1-tetrahydrofolate synthase, cytoplasmic OS=Homo sapiens GN=MTHFD1 PE=1 SV=1	HUMAN	2
452	0	4.06	2.888	2.888	2.139	sp|P11586|C1TC_HUMAN	C-1-tetrahydrofolate synthase, cytoplasmic OS=Homo sapiens GN=MTHFD1 PE=1 SV=3	HUMAN	2
452	0	2	10.28	10.28	10.28	tr|V9GYY3|V9GYY3_HUMAN	C-1-tetrahydrofolate synthase, cytoplasmic (Fragment) OS=Homo sapiens GN=MTHFD1 PE=1 SV=1	HUMAN	1
453	4	4.03	26.27	7.952	7.952	sp|P52597|HNRPF_HUMAN	Heterogeneous nuclear ribonucleoprotein F OS=Homo sapiens GN=HNRNPF PE=1 SV=3	HUMAN	2
454	4	4	35.98	12.55	12.55	tr|H9KVA2|H9KVA2_HUMAN	Troponin T, fast skeletal muscle OS=Homo sapiens GN=TNNT3 PE=1 SV=1	HUMAN	3
454	0	4	35.25	12.3	12.3	tr|F8WA37|F8WA37_HUMAN	Troponin T, fast skeletal muscle OS=Homo sapiens GN=TNNT3 PE=1 SV=1	HUMAN	3
454	0	4	35.98	12.55	12.55	tr|C9JZN9|C9JZN9_HUMAN	Troponin T, fast skeletal muscle OS=Homo sapiens GN=TNNT3 PE=1 SV=1	HUMAN	3
454	0	4	41.35	14.42	14.42	tr|C9JCA5|C9JCA5_HUMAN	Troponin T, fast skeletal muscle (Fragment) OS=Homo sapiens GN=TNNT3 PE=1 SV=1	HUMAN	3
454	0	4	31.97	11.15	11.15	sp|P45378|TNNT3_HUMAN	Troponin T, fast skeletal muscle OS=Homo sapiens GN=TNNT3 PE=1 SV=3	HUMAN	3
455	4	4	6.612	2.627	2.627	sp|Q9BSJ8|ESYT1_HUMAN	Extended synaptotagmin-1 OS=Homo sapiens GN=ESYT1 PE=1 SV=1	HUMAN	2
456	4	4	8.566	1.862	1.862	sp|Q13591|SEM5A_HUMAN	Semaphorin-5A OS=Homo sapiens GN=SEMA5A PE=1 SV=3	HUMAN	2
456	0	2	12.87	4.455	4.455	tr|H0Y9H9|H0Y9H9_HUMAN	Semaphorin-5A (Fragment) OS=Homo sapiens GN=SEMA5A PE=4 SV=1	HUMAN	1
456	0	2	10.24	3.543	3.543	tr|D6RAF4|D6RAF4_HUMAN	Semaphorin-5A (Fragment) OS=Homo sapiens GN=SEMA5A PE=1 SV=1	HUMAN	1
457	4	4	27.6	9.502	9.502	sp|P16402|H13_HUMAN	Histone H1.3 OS=Homo sapiens GN=HIST1H1D PE=1 SV=2	HUMAN	2
457	0	4	23.94	9.859	9.859	sp|P16403|H12_HUMAN	Histone H1.2 OS=Homo sapiens GN=HIST1H1C PE=1 SV=2	HUMAN	2
457	0	4	24.2	9.589	9.589	sp|P10412|H14_HUMAN	Histone H1.4 OS=Homo sapiens GN=HIST1H1E PE=1 SV=2	HUMAN	2
457	0	2	5.116	5.116	5.116	sp|Q02539|H11_HUMAN	Histone H1.1 OS=Homo sapiens GN=HIST1H1A PE=1 SV=3	HUMAN	1
457	0	2	5.314	5.314	5.314	sp|P22492|H1T_HUMAN	Histone H1t OS=Homo sapiens GN=HIST1H1T PE=2 SV=4	HUMAN	1
458	4	4	10.82	6.452	6.452	sp|P04040|CATA_HUMAN	Catalase OS=Homo sapiens GN=CAT PE=1 SV=3	HUMAN	2
459	4	4	15.99	8.629	8.629	tr|A0A0B4J2A4|A0A0B4J2A4_HUMAN	3-ketoacyl-CoA thiolase, mitochondrial OS=Homo sapiens GN=ACAA2 PE=4 SV=1	HUMAN	2
459	0	4	15.87	8.564	8.564	sp|P42765|THIM_HUMAN	3-ketoacyl-CoA thiolase, mitochondrial OS=Homo sapiens GN=ACAA2 PE=1 SV=2	HUMAN	2
459	0	2	10.82	2.339	2.339	tr|K7EME0|K7EME0_HUMAN	3-ketoacyl-CoA thiolase, mitochondrial OS=Homo sapiens GN=ACAA2 PE=1 SV=1	HUMAN	1
460	4	4	13.52	7.324	7.324	sp|P04899|GNAI2_HUMAN	Guanine nucleotide-binding protein G(i) subunit alpha-2 OS=Homo sapiens GN=GNAI2 PE=1 SV=3	HUMAN	2
460	0.02	2.04	12.07	2.887	2.887	sp|Q03113|GNA12_HUMAN	Guanine nucleotide-binding protein subunit alpha-12 OS=Homo sapiens GN=GNA12 PE=1 SV=4	HUMAN	1
460	0.01	2.01	10	3.143	3.143	sp|P11488|GNAT1_HUMAN	Guanine nucleotide-binding protein G(t) subunit alpha-1 OS=Homo sapiens GN=GNAT1 PE=1 SV=5	HUMAN	1
460	0	2.02	4.802	4.802	3.107	sp|P09471|GNAO_HUMAN	Guanine nucleotide-binding protein G(o) subunit alpha OS=Homo sapiens GN=GNAO1 PE=1 SV=4	HUMAN	1
460	0	2	14.12	3.107	3.107	sp|A8MTJ3|GNAT3_HUMAN	Guanine nucleotide-binding protein G(t) subunit alpha-3 OS=Homo sapiens GN=GNAT3 PE=2 SV=2	HUMAN	1
460	0	2	4.05	1.061	1.061	sp|Q5JWF2|GNAS1_HUMAN	Guanine nucleotide-binding protein G(s) subunit alpha isoforms XLas OS=Homo sapiens GN=GNAS PE=1 SV=2	HUMAN	1
460	0	2	9.887	3.107	3.107	sp|P19087|GNAT2_HUMAN	Guanine nucleotide-binding protein G(t) subunit alpha-2 OS=Homo sapiens GN=GNAT2 PE=1 SV=4	HUMAN	1
460	0	2	5.65	3.107	3.107	sp|P08754|GNAI3_HUMAN	Guanine nucleotide-binding protein G(k) subunit alpha OS=Homo sapiens GN=GNAI3 PE=1 SV=3	HUMAN	1
460	0	2	12.95	5.699	5.699	tr|Q5JWE9|Q5JWE9_HUMAN	Guanine nucleotide-binding protein G(s) subunit alpha isoforms short (Fragment) OS=Homo sapiens GN=GNAS PE=1 SV=1	HUMAN	1
460	0	2	12.56	5.528	5.528	tr|H0Y7F4|H0Y7F4_HUMAN	Guanine nucleotide-binding protein G(s) subunit alpha isoforms short (Fragment) OS=Homo sapiens GN=GNAS PE=1 SV=1	HUMAN	1
460	0	2	26.88	11.83	11.83	tr|H0Y7E8|H0Y7E8_HUMAN	Guanine nucleotide-binding protein G(s) subunit alpha isoforms short (Fragment) OS=Homo sapiens GN=GNAS PE=1 SV=1	HUMAN	1
460	0	2	4.802	3.107	3.107	sp|P63096|GNAI1_HUMAN	Guanine nucleotide-binding protein G(i) subunit alpha-1 OS=Homo sapiens GN=GNAI1 PE=1 SV=2	HUMAN	1
460	0	2	4.199	2.887	2.887	sp|P38405|GNAL_HUMAN	Guanine nucleotide-binding protein G(olf) subunit alpha OS=Homo sapiens GN=GNAL PE=1 SV=1	HUMAN	1
460	0	2	12.64	12.64	12.64	tr|Q5JWD1|Q5JWD1_HUMAN	Guanine nucleotide-binding protein G(s) subunit alpha isoforms short OS=Homo sapiens GN=GNAS PE=1 SV=1	HUMAN	1
460	0	2	18.03	18.03	18.03	tr|A2A2R6|A2A2R6_HUMAN	Guanine nucleotide-binding protein G(s) subunit alpha isoforms short (Fragment) OS=Homo sapiens GN=GNAS PE=1 SV=1	HUMAN	1
460	0	2	8.943	8.943	8.943	tr|A0A087WZE5|A0A087WZE5_HUMAN	Guanine nucleotide-binding protein G(t) subunit alpha-2 (Fragment) OS=Homo sapiens GN=GNAT2 PE=1 SV=2	HUMAN	1
460	0	2	20.37	20.37	20.37	tr|A0A087WTB6|A0A087WTB6_HUMAN	Guanine nucleotide-binding protein G(o) subunit alpha OS=Homo sapiens GN=GNAO1 PE=1 SV=1	HUMAN	1
460	0	2	2.918	2.918	2.918	sp|Q14344|GNA13_HUMAN	Guanine nucleotide-binding protein subunit alpha-13 OS=Homo sapiens GN=GNA13 PE=1 SV=2	HUMAN	1
460	0	2	2.792	2.792	2.792	sp|P63092|GNAS2_HUMAN	Guanine nucleotide-binding protein G(s) subunit alpha isoforms short OS=Homo sapiens GN=GNAS PE=1 SV=1	HUMAN	1
461	4	4	7.448	6.181	6.181	sp|P04844|RPN2_HUMAN	Dolichyl-diphosphooligosaccharide--protein glycosyltransferase subunit 2 OS=Homo sapiens GN=RPN2 PE=1 SV=3	HUMAN	2
461	0	2	3.488	3.488	3.488	tr|Q5JYR7|Q5JYR7_HUMAN	Dolichyl-diphosphooligosaccharide--protein glycosyltransferase subunit 2 (Fragment) OS=Homo sapiens GN=RPN2 PE=1 SV=4	HUMAN	1
461	0	2	7.229	7.229	7.229	tr|Q5JYR4|Q5JYR4_HUMAN	Dolichyl-diphosphooligosaccharide--protein glycosyltransferase subunit 2 (Fragment) OS=Homo sapiens GN=RPN2 PE=1 SV=4	HUMAN	1
461	0	2	7.407	7.407	7.407	tr|F2Z3K5|F2Z3K5_HUMAN	Dolichyl-diphosphooligosaccharide--protein glycosyltransferase subunit 2 (Fragment) OS=Homo sapiens GN=RPN2 PE=1 SV=1	HUMAN	1
462	3.97	3.98	32.87	30.77	23.08	tr|B0QYF8|B0QYF8_HUMAN	Myoglobin (Fragment) OS=Homo sapiens GN=MB PE=1 SV=1	HUMAN	4
462	0	3.98	30.52	28.57	21.43	sp|P02144|MYG_HUMAN	Myoglobin OS=Homo sapiens GN=MB PE=1 SV=2	HUMAN	4
462	0	3.23	20.2	20.2	20.2	tr|Q8WVH6|Q8WVH6_HUMAN	Myoglobin OS=Homo sapiens GN=MB PE=1 SV=1	HUMAN	2
462	0	2.66	38.68	35.85	25.47	tr|F2Z2F1|F2Z2F1_HUMAN	Myoglobin (Fragment) OS=Homo sapiens GN=MB PE=1 SV=1	HUMAN	3
462	0	2	18.92	18.92	18.92	tr|B0QYF7|B0QYF7_HUMAN	Myoglobin (Fragment) OS=Homo sapiens GN=MB PE=1 SV=1	HUMAN	1
463	3.96	3.96	9.276	4.751	4.751	sp|Q9BRK3|MXRA8_HUMAN	Matrix-remodeling-associated protein 8 OS=Homo sapiens GN=MXRA8 PE=2 SV=1	HUMAN	2
464	3.96	3.96	21.4	12.23	12.23	sp|P68402|PA1B2_HUMAN	Platelet-activating factor acetylhydrolase IB subunit beta OS=Homo sapiens GN=PAFAH1B2 PE=1 SV=1	HUMAN	2
464	0	2	5.143	5.143	5.143	tr|J3KNE3|J3KNE3_HUMAN	Platelet-activating factor acetylhydrolase IB subunit beta (Fragment) OS=Homo sapiens GN=PAFAH1B2 PE=1 SV=1	HUMAN	1
465	3.94	3.94	19.64	15.11	10.57	sp|Q9Y266|NUDC_HUMAN	Nuclear migration protein nudC OS=Homo sapiens GN=NUDC PE=1 SV=1	HUMAN	3
465	0	1.82	20.43	16.13	8.065	tr|A0A0A0MSU9|A0A0A0MSU9_HUMAN	Nuclear migration protein nudC (Fragment) OS=Homo sapiens GN=NUDC PE=1 SV=1	HUMAN	1
465	0	1.82	28.57	22.56	11.28	tr|A0A0A0MSS4|A0A0A0MSS4_HUMAN	Nuclear migration protein nudC (Fragment) OS=Homo sapiens GN=NUDC PE=1 SV=1	HUMAN	1
466	3.94	3.94	34.51	34.51	34.51	sp|P69905|HBA_HUMAN	Hemoglobin subunit alpha OS=Homo sapiens GN=HBA1 PE=1 SV=2	HUMAN	4
466	0	2.7	30.91	30.91	30.91	tr|G3V1N2|G3V1N2_HUMAN	HCG1745306, isoform CRA_a OS=Homo sapiens GN=HBA2 PE=1 SV=1	HUMAN	3
467	3.93	3.94	16.94	10.3	10.3	tr|C9J3R8|C9J3R8_HUMAN	Beta-1,4-galactosyltransferase 4 OS=Homo sapiens GN=B4GALT4 PE=1 SV=1	HUMAN	2
467	0	3.94	14.83	9.012	9.012	sp|O60513|B4GT4_HUMAN	Beta-1,4-galactosyltransferase 4 OS=Homo sapiens GN=B4GALT4 PE=1 SV=1	HUMAN	2
467	0	3.93	18.7	12.6	12.6	tr|E7ETS9|E7ETS9_HUMAN	Beta-1,4-galactosyltransferase 4 OS=Homo sapiens GN=B4GALT4 PE=1 SV=1	HUMAN	2
467	0	2.01	27.97	15.25	15.25	tr|C9J5S0|C9J5S0_HUMAN	Beta-1,4-galactosyltransferase 4 (Fragment) OS=Homo sapiens GN=B4GALT4 PE=1 SV=1	HUMAN	1
467	0	2.01	24.26	13.24	13.24	tr|C9J4S5|C9J4S5_HUMAN	Beta-1,4-galactosyltransferase 4 (Fragment) OS=Homo sapiens GN=B4GALT4 PE=1 SV=1	HUMAN	1
468	3.93	3.93	28.37	23.72	11.16	sp|P09429|HMGB1_HUMAN	High mobility group protein B1 OS=Homo sapiens GN=HMGB1 PE=1 SV=3	HUMAN	3
468	0	2.8	32.91	26.58	9.494	tr|Q5T7C4|Q5T7C4_HUMAN	High mobility group protein B1 OS=Homo sapiens GN=HMGB1 PE=1 SV=1	HUMAN	2
468	0	2.78	16.11	10.9	7.109	sp|B2RPK0|HGB1A_HUMAN	Putative high mobility group protein B1-like 1 OS=Homo sapiens GN=HMGB1P1 PE=5 SV=1	HUMAN	2
469	3.92	3.93	16.89	11.26	6.214	sp|P11413|G6PD_HUMAN	Glucose-6-phosphate 1-dehydrogenase OS=Homo sapiens GN=G6PD PE=1 SV=4	HUMAN	3
469	0	3.87	30.08	18.75	12.5	tr|E9PD92|E9PD92_HUMAN	Glucose-6-phosphate 1-dehydrogenase (Fragment) OS=Homo sapiens GN=G6PD PE=1 SV=1	HUMAN	3
469	0	3.87	22.78	14.2	9.467	tr|E7EUI8|E7EUI8_HUMAN	Glucose-6-phosphate 1-dehydrogenase (Fragment) OS=Homo sapiens GN=G6PD PE=1 SV=4	HUMAN	3
469	0	3.87	24.06	15	10	tr|E7EM57|E7EM57_HUMAN	Glucose-6-phosphate 1-dehydrogenase (Fragment) OS=Homo sapiens GN=G6PD PE=1 SV=1	HUMAN	3
470	3.9	3.9	7.294	2.799	1.951	sp|Q92896|GSLG1_HUMAN	Golgi apparatus protein 1 OS=Homo sapiens GN=GLG1 PE=1 SV=2	HUMAN	2
470	0	3.9	11.46	4.728	3.295	tr|H3BM42|H3BM42_HUMAN	Golgi apparatus protein 1 OS=Homo sapiens GN=GLG1 PE=1 SV=1	HUMAN	2
471	3.9	3.9	24.5	22	19	tr|X6R8F3|X6R8F3_HUMAN	Neutrophil gelatinase-associated lipocalin OS=Homo sapiens GN=LCN2 PE=1 SV=1	HUMAN	3
471	0	3.89	22.22	22.22	19.19	sp|P80188|NGAL_HUMAN	Neutrophil gelatinase-associated lipocalin OS=Homo sapiens GN=LCN2 PE=1 SV=2	HUMAN	3
472	3.89	3.89	18.52	10.19	8.102	sp|P23526|SAHH_HUMAN	Adenosylhomocysteinase OS=Homo sapiens GN=AHCY PE=1 SV=4	HUMAN	3
473	3.89	3.89	19.53	14.88	14.88	sp|O75396|SC22B_HUMAN	Vesicle-trafficking protein SEC22b OS=Homo sapiens GN=SEC22B PE=1 SV=4	HUMAN	3
473	0	2	17.72	17.72	17.72	tr|A0A087X1A9|A0A087X1A9_HUMAN	Vesicle-trafficking protein SEC22b (Fragment) OS=Homo sapiens GN=SEC22B PE=1 SV=1	HUMAN	1
474	3.87	7.03	28.04	26.2	21.77	sp|Q13162|PRDX4_HUMAN	Peroxiredoxin-4 OS=Homo sapiens GN=PRDX4 PE=1 SV=1	HUMAN	6
474	0	6.1	30.43	27.33	22.98	tr|H7C3T4|H7C3T4_HUMAN	Peroxiredoxin-4 (Fragment) OS=Homo sapiens GN=PRDX4 PE=1 SV=1	HUMAN	5
475	3.86	36.91	73.24	61.97	47.54	sp|P07951|TPM2_HUMAN	Tropomyosin beta chain OS=Homo sapiens GN=TPM2 PE=1 SV=1	HUMAN	21
475	0	36.91	59.63	54.66	41.93	tr|Q5TCU8|Q5TCU8_HUMAN	Tropomyosin beta chain OS=Homo sapiens GN=TPM2 PE=1 SV=1	HUMAN	21
475	0	36.91	67.61	61.97	47.54	tr|Q5TCU3|Q5TCU3_HUMAN	Tropomyosin beta chain OS=Homo sapiens GN=TPM2 PE=1 SV=1	HUMAN	21
475	0	6.49	44.14	32.43	19.82	tr|U3KQK2|U3KQK2_HUMAN	Tropomyosin beta chain (Fragment) OS=Homo sapiens GN=TPM2 PE=1 SV=1	HUMAN	4
476	3.85	3.9	25	20.48	12.35	sp|Q53FA7|QORX_HUMAN	Quinone oxidoreductase PIG3 OS=Homo sapiens GN=TP53I3 PE=1 SV=2	HUMAN	3
476	0	2.11	13.89	13.89	4.63	tr|H7BZH6|H7BZH6_HUMAN	Quinone oxidoreductase PIG3 (Fragment) OS=Homo sapiens GN=TP53I3 PE=1 SV=1	HUMAN	1
477	3.84	3.84	35.02	30.32	10.83	sp|Q15404|RSU1_HUMAN	Ras suppressor protein 1 OS=Homo sapiens GN=RSU1 PE=1 SV=3	HUMAN	3
478	3.8	3.8	16.23	5.217	5.217	sp|P02749|APOH_HUMAN	Beta-2-glycoprotein 1 OS=Homo sapiens GN=APOH PE=1 SV=3	HUMAN	3
478	0	3.8	17.31	17.31	17.31	tr|J3KS17|J3KS17_HUMAN	Beta-2-glycoprotein 1 (Fragment) OS=Homo sapiens GN=APOH PE=1 SV=1	HUMAN	3
479	3.79	3.79	17.77	17.77	17.77	tr|G3V5Q1|G3V5Q1_HUMAN	DNA-(apurinic or apyrimidinic site) lyase (Fragment) OS=Homo sapiens GN=APEX1 PE=1 SV=1	HUMAN	4
479	0	3.79	16.35	16.35	16.35	tr|G3V3M6|G3V3M6_HUMAN	DNA-(apurinic or apyrimidinic site) lyase (Fragment) OS=Homo sapiens GN=APEX1 PE=1 SV=1	HUMAN	4
479	0	3.79	13.52	13.52	13.52	sp|P27695|APEX1_HUMAN	DNA-(apurinic or apyrimidinic site) lyase OS=Homo sapiens GN=APEX1 PE=1 SV=2	HUMAN	4
480	3.77	6.09	21.9	14.16	10.18	sp|Q6KB66|K2C80_HUMAN	Keratin, type II cytoskeletal 80 OS=Homo sapiens GN=KRT80 PE=1 SV=2	HUMAN	4
481	3.76	3.76	15.46	5.386	5.386	sp|P36578|RL4_HUMAN	60S ribosomal protein L4 OS=Homo sapiens GN=RPL4 PE=1 SV=5	HUMAN	2
481	0	3.76	18.02	6.907	6.907	tr|H3BM89|H3BM89_HUMAN	60S ribosomal protein L4 OS=Homo sapiens GN=RPL4 PE=1 SV=1	HUMAN	2
482	3.75	3.75	32.66	17.34	12.1	sp|P18124|RL7_HUMAN	60S ribosomal protein L7 OS=Homo sapiens GN=RPL7 PE=1 SV=1	HUMAN	2
482	0	3.75	36.54	20.67	14.42	tr|A8MUD9|A8MUD9_HUMAN	60S ribosomal protein L7 OS=Homo sapiens GN=RPL7 PE=1 SV=1	HUMAN	2
483	3.72	3.73	48.12	35.34	27.07	tr|G3V213|G3V213_HUMAN	Adenylate kinase 2, isoform CRA_a OS=Homo sapiens GN=AK2 PE=1 SV=1	HUMAN	4
483	0	3.73	25.43	20.26	15.52	tr|F8W1A4|F8W1A4_HUMAN	Adenylate kinase 2, mitochondrial OS=Homo sapiens GN=AK2 PE=1 SV=1	HUMAN	4
483	0	3.73	36.42	29.01	22.22	tr|F8VZG5|F8VZG5_HUMAN	Adenylate kinase 2, mitochondrial OS=Homo sapiens GN=AK2 PE=1 SV=1	HUMAN	4
483	0	3.73	24.69	19.67	15.06	sp|P54819|KAD2_HUMAN	Adenylate kinase 2, mitochondrial OS=Homo sapiens GN=AK2 PE=1 SV=2	HUMAN	4
483	0	3.19	17.89	17.89	12.11	tr|F8VY04|F8VY04_HUMAN	Adenylate kinase 2, mitochondrial OS=Homo sapiens GN=AK2 PE=1 SV=1	HUMAN	3
484	3.72	3.72	8.271	8.271	8.271	sp|O94907|DKK1_HUMAN	Dickkopf-related protein 1 OS=Homo sapiens GN=DKK1 PE=1 SV=1	HUMAN	2
484	0	1.6	20.08	3.861	3.861	sp|Q9UBU2|DKK2_HUMAN	Dickkopf-related protein 2 OS=Homo sapiens GN=DKK2 PE=1 SV=1	HUMAN	1
484	0	1.6	12.21	4.695	4.695	tr|D6RCC2|D6RCC2_HUMAN	Dickkopf-related protein 2 OS=Homo sapiens GN=DKK2 PE=4 SV=1	HUMAN	1
484	0	1.6	6.289	6.289	6.289	tr|D6RGF1|D6RGF1_HUMAN	Dickkopf-related protein 2 OS=Homo sapiens GN=DKK2 PE=4 SV=1	HUMAN	1
485	3.71	3.71	18.67	7.579	4.806	sp|P48643|TCPE_HUMAN	T-complex protein 1 subunit epsilon OS=Homo sapiens GN=CCT5 PE=1 SV=1	HUMAN	2
485	0	3.63	11.92	6.346	5	tr|E9PCA1|E9PCA1_HUMAN	T-complex protein 1 subunit epsilon OS=Homo sapiens GN=CCT5 PE=1 SV=1	HUMAN	2
485	0	3.63	12.33	6.561	5.169	tr|B7ZAR1|B7ZAR1_HUMAN	T-complex protein 1 subunit epsilon OS=Homo sapiens GN=CCT5 PE=1 SV=1	HUMAN	2
485	0	3.55	14.4	6.996	5.35	tr|E7ENZ3|E7ENZ3_HUMAN	T-complex protein 1 subunit epsilon OS=Homo sapiens GN=CCT5 PE=1 SV=1	HUMAN	2
486	3.68	3.68	8.389	4.474	4.474	sp|Q08554|DSC1_HUMAN	Desmocollin-1 OS=Homo sapiens GN=DSC1 PE=1 SV=2	HUMAN	4
487	3.66	3.68	8.328	1.599	1.599	tr|G8JL96|G8JL96_HUMAN	Protein-tyrosine-phosphatase OS=Homo sapiens GN=PTPRS PE=1 SV=2	HUMAN	2
487	0	3.68	8.306	1.595	1.595	tr|A0A0A0MR60|A0A0A0MR60_HUMAN	Receptor-type tyrosine-protein phosphatase S OS=Homo sapiens GN=PTPRS PE=1 SV=1	HUMAN	2
487	0	3.59	6.417	1.232	1.232	sp|Q13332|PTPRS_HUMAN	Receptor-type tyrosine-protein phosphatase S OS=Homo sapiens GN=PTPRS PE=1 SV=3	HUMAN	2
488	3.66	3.66	9.284	6.6	4.027	sp|Q12906|ILF3_HUMAN	Interleukin enhancer-binding factor 3 OS=Homo sapiens GN=ILF3 PE=1 SV=3	HUMAN	3
489	3.65	3.65	10.07	4.789	3.22	sp|O95450|ATS2_HUMAN	A disintegrin and metalloproteinase with thrombospondin motifs 2 OS=Homo sapiens GN=ADAMTS2 PE=2 SV=2	HUMAN	2
490	3.64	3.64	18.75	12.81	12.81	tr|J3KQJ1|J3KQJ1_HUMAN	Sulfatase-modifying factor 2 OS=Homo sapiens GN=SUMF2 PE=1 SV=1	HUMAN	3
490	0	3.64	18.75	13.49	13.49	tr|H7C3B2|H7C3B2_HUMAN	Sulfatase-modifying factor 2 (Fragment) OS=Homo sapiens GN=SUMF2 PE=1 SV=1	HUMAN	3
490	0	3.64	45.45	24.85	24.85	tr|F8WEX5|F8WEX5_HUMAN	Sulfatase-modifying factor 2 OS=Homo sapiens GN=SUMF2 PE=1 SV=1	HUMAN	3
490	0	3.64	40.98	22.4	22.4	tr|E9PG02|E9PG02_HUMAN	Sulfatase-modifying factor 2 OS=Homo sapiens GN=SUMF2 PE=1 SV=1	HUMAN	3
490	0	3.64	25.86	17.67	17.67	tr|E9PBT8|E9PBT8_HUMAN	Sulfatase-modifying factor 2 OS=Homo sapiens GN=SUMF2 PE=1 SV=1	HUMAN	3
490	0	3.64	19.93	13.62	13.62	sp|Q8NBJ7|SUMF2_HUMAN	Sulfatase-modifying factor 2 OS=Homo sapiens GN=SUMF2 PE=1 SV=2	HUMAN	3
490	0	3.64	13.41	11.45	11.45	tr|F8WA42|F8WA42_HUMAN	Sulfatase-modifying factor 2 OS=Homo sapiens GN=SUMF2 PE=1 SV=1	HUMAN	3
490	0	3.64	16.38	13.99	13.99	tr|C9JL30|C9JL30_HUMAN	Sulfatase-modifying factor 2 (Fragment) OS=Homo sapiens GN=SUMF2 PE=1 SV=5	HUMAN	3
490	0	3.64	13.64	11.65	11.65	tr|C9J660|C9J660_HUMAN	Sulfatase-modifying factor 2 OS=Homo sapiens GN=SUMF2 PE=1 SV=1	HUMAN	3
491	3.63	3.65	22.67	5.938	2.564	sp|Q09328|MGT5A_HUMAN	Alpha-1,6-mannosylglycoprotein 6-beta-N-acetylglucosaminyltransferase A OS=Homo sapiens GN=MGAT5 PE=1 SV=1	HUMAN	2
492	3.62	5.69	21.27	14.29	14.29	sp|O43852|CALU_HUMAN	Calumenin OS=Homo sapiens GN=CALU PE=1 SV=2	HUMAN	3
492	0	2.01	18.37	8.844	8.844	tr|H0Y875|H0Y875_HUMAN	Calumenin (Fragment) OS=Homo sapiens GN=CALU PE=1 SV=1	HUMAN	1
493	3.61	3.61	15.67	6.903	5.037	sp|P04062|GLCM_HUMAN	Glucosylceramidase OS=Homo sapiens GN=GBA PE=1 SV=3	HUMAN	2
494	3.6	3.6	39.61	30.43	11.11	tr|D6RE83|D6RE83_HUMAN	Ubiquitin carboxyl-terminal hydrolase OS=Homo sapiens GN=UCHL1 PE=1 SV=1	HUMAN	2
494	0	3.6	36.77	28.25	10.31	sp|P09936|UCHL1_HUMAN	Ubiquitin carboxyl-terminal hydrolase isozyme L1 OS=Homo sapiens GN=UCHL1 PE=1 SV=2	HUMAN	2
494	0	3.19	27.8	12.86	9.544	tr|D6R956|D6R956_HUMAN	Ubiquitin carboxyl-terminal hydrolase OS=Homo sapiens GN=UCHL1 PE=1 SV=1	HUMAN	2
494	0	3.19	32.05	19.87	14.74	tr|D6R974|D6R974_HUMAN	Ubiquitin carboxyl-terminal hydrolase OS=Homo sapiens GN=UCHL1 PE=1 SV=1	HUMAN	2
495	3.59	3.75	8.092	4.817	3.854	sp|P28838|AMPL_HUMAN	Cytosol aminopeptidase OS=Homo sapiens GN=LAP3 PE=1 SV=3	HUMAN	2
496	3.58	3.58	16.11	8.413	8.413	tr|J3KQ32|J3KQ32_HUMAN	Obg-like ATPase 1 OS=Homo sapiens GN=OLA1 PE=1 SV=1	HUMAN	3
496	0	3.58	16.92	8.838	8.838	sp|Q9NTK5|OLA1_HUMAN	Obg-like ATPase 1 OS=Homo sapiens GN=OLA1 PE=1 SV=2	HUMAN	3
496	0	2.89	22.41	22.41	22.41	tr|C9JTK6|C9JTK6_HUMAN	Obg-like ATPase 1 (Fragment) OS=Homo sapiens GN=OLA1 PE=1 SV=1	HUMAN	2
497	3.57	3.57	52.02	20.16	13.31	sp|Q15056|IF4H_HUMAN	Eukaryotic translation initiation factor 4H OS=Homo sapiens GN=EIF4H PE=1 SV=5	HUMAN	2
498	3.56	3.56	18.02	13.51	13.51	tr|J3KN29|J3KN29_HUMAN	26S proteasome non-ATPase regulatory subunit 9 OS=Homo sapiens GN=PSMD9 PE=1 SV=1	HUMAN	3
498	0	3.56	26.14	19.61	19.61	tr|F5H5V4|F5H5V4_HUMAN	26S proteasome non-ATPase regulatory subunit 9 (Fragment) OS=Homo sapiens GN=PSMD9 PE=1 SV=1	HUMAN	3
498	0	3.56	22.35	16.76	16.76	tr|F5GX23|F5GX23_HUMAN	26S proteasome non-ATPase regulatory subunit 9 OS=Homo sapiens GN=PSMD9 PE=1 SV=1	HUMAN	3
498	0	3.56	17.94	13.45	13.45	sp|O00233|PSMD9_HUMAN	26S proteasome non-ATPase regulatory subunit 9 OS=Homo sapiens GN=PSMD9 PE=1 SV=3	HUMAN	3
498	0	1.85	44.71	22.35	22.35	tr|F5H7X1|F5H7X1_HUMAN	26S proteasome non-ATPase regulatory subunit 9 OS=Homo sapiens GN=PSMD9 PE=1 SV=1	HUMAN	2
498	0	1.84	15.63	15.63	15.63	tr|F5H169|F5H169_HUMAN	26S proteasome non-ATPase regulatory subunit 9 OS=Homo sapiens GN=PSMD9 PE=1 SV=1	HUMAN	2
499	3.55	3.61	8.287	3.024	1.68	sp|Q8IYM0|F186B_HUMAN	Protein FAM186B OS=Homo sapiens GN=FAM186B PE=2 SV=2	HUMAN	2
499	0.01	1.47	24.56	14.04	14.04	tr|E9PMM1|E9PMM1_HUMAN	Protein FAM186B OS=Homo sapiens GN=FAM186B PE=4 SV=1	HUMAN	1
499	0	1.46	5.809	5.394	3.32	tr|F8VRJ5|F8VRJ5_HUMAN	Protein FAM186B OS=Homo sapiens GN=FAM186B PE=4 SV=1	HUMAN	1
500	3.53	4.89	29.46	17.43	17.43	sp|P28066|PSA5_HUMAN	Proteasome subunit alpha type-5 OS=Homo sapiens GN=PSMA5 PE=1 SV=3	HUMAN	4
501	3.53	3.53	9.03	4.178	3.369	sp|P16070|CD44_HUMAN	CD44 antigen OS=Homo sapiens GN=CD44 PE=1 SV=3	HUMAN	3
501	0	3.14	29.61	12.14	12.14	tr|H0YD13|H0YD13_HUMAN	CD44 antigen OS=Homo sapiens GN=CD44 PE=1 SV=2	HUMAN	3
501	0	3.14	18.47	8.711	8.711	tr|H0Y2P0|H0Y2P0_HUMAN	CD44 antigen (Fragment) OS=Homo sapiens GN=CD44 PE=1 SV=1	HUMAN	3
501	0	2.3	8.19	8.19	5.603	tr|J3KN83|J3KN83_HUMAN	CD44 antigen (Fragment) OS=Homo sapiens GN=CD44 PE=1 SV=1	HUMAN	2
501	0	1.92	37.8	15.85	15.85	tr|H0YE40|H0YE40_HUMAN	CD44 antigen (Fragment) OS=Homo sapiens GN=CD44 PE=1 SV=1	HUMAN	2
501	0	1.35	15.47	9.945	6.63	tr|H0YDX6|H0YDX6_HUMAN	CD44 antigen (Fragment) OS=Homo sapiens GN=CD44 PE=1 SV=1	HUMAN	1
502	3.51	3.51	7.547	6.604	3.585	tr|M0QXS5|M0QXS5_HUMAN	Heterogeneous nuclear ribonucleoprotein L (Fragment) OS=Homo sapiens GN=HNRNPL PE=1 SV=1	HUMAN	2
502	0	3.51	6.791	5.942	3.226	sp|P14866|HNRPL_HUMAN	Heterogeneous nuclear ribonucleoprotein L OS=Homo sapiens GN=HNRNPL PE=1 SV=2	HUMAN	2
502	0	3.29	10.91	8.636	8.636	tr|M0R1W6|M0R1W6_HUMAN	Heterogeneous nuclear ribonucleoprotein L (Fragment) OS=Homo sapiens GN=HNRNPL PE=1 SV=1	HUMAN	2
502	0	3.29	13.41	10.61	10.61	tr|B4DVF8|B4DVF8_HUMAN	Heterogeneous nuclear ribonucleoprotein L OS=Homo sapiens GN=HNRNPL PE=1 SV=1	HUMAN	2
502	0	2.01	8.081	5.556	5.556	tr|M0QYL7|M0QYL7_HUMAN	Heterogeneous nuclear ribonucleoprotein L (Fragment) OS=Homo sapiens GN=HNRNPL PE=1 SV=1	HUMAN	1
503	3.5	3.86	21.78	19.11	12.44	sp|P24534|EF1B_HUMAN	Elongation factor 1-beta OS=Homo sapiens GN=EEF1B2 PE=1 SV=3	HUMAN	2
503	0	2.03	72.41	51.72	51.72	tr|F8WF65|F8WF65_HUMAN	Elongation factor 1-beta OS=Homo sapiens GN=EEF1B2 PE=1 SV=1	HUMAN	1
503	0	2.03	30.88	22.06	22.06	tr|F2Z2G2|F2Z2G2_HUMAN	Elongation factor 1-beta OS=Homo sapiens GN=EEF1B2 PE=1 SV=1	HUMAN	1
503	0	2.03	17.07	12.2	12.2	tr|C9JZW3|C9JZW3_HUMAN	Elongation factor 1-beta (Fragment) OS=Homo sapiens GN=EEF1B2 PE=1 SV=1	HUMAN	1
504	3.48	7.83	29.28	24.03	13.81	sp|Q04826|1B40_HUMAN	HLA class I histocompatibility antigen, B-40 alpha chain OS=Homo sapiens GN=HLA-B PE=1 SV=1	HUMAN	5
504	0	7.83	29.28	24.03	13.81	sp|P30485|1B47_HUMAN	HLA class I histocompatibility antigen, B-47 alpha chain OS=Homo sapiens GN=HLA-B PE=1 SV=1	HUMAN	5
504	0	7.63	36.46	22.38	13.81	sp|P30488|1B50_HUMAN	HLA class I histocompatibility antigen, B-50 alpha chain OS=Homo sapiens GN=HLA-B PE=1 SV=1	HUMAN	5
504	0	7.63	36.46	22.38	13.81	sp|P30487|1B49_HUMAN	HLA class I histocompatibility antigen, B-49 alpha chain OS=Homo sapiens GN=HLA-B PE=1 SV=2	HUMAN	5
504	0	7.63	29.83	22.38	13.81	sp|P30483|1B45_HUMAN	HLA class I histocompatibility antigen, B-45 alpha chain OS=Homo sapiens GN=HLA-B PE=1 SV=1	HUMAN	5
504	0	7.63	26.24	22.38	13.81	sp|P30481|1B44_HUMAN	HLA class I histocompatibility antigen, B-44 alpha chain OS=Homo sapiens GN=HLA-B PE=1 SV=1	HUMAN	5
504	0	7.58	24.86	19.34	13.81	sp|P30479|1B41_HUMAN	HLA class I histocompatibility antigen, B-41 alpha chain OS=Homo sapiens GN=HLA-B PE=1 SV=1	HUMAN	5
504	0	6.63	35.36	21.55	11.33	sp|P03989|1B27_HUMAN	HLA class I histocompatibility antigen, B-27 alpha chain OS=Homo sapiens GN=HLA-B PE=1 SV=2	HUMAN	4
504	0	3.53	23.48	16.3	6.077	sp|P30461|1B13_HUMAN	HLA class I histocompatibility antigen, B-13 alpha chain OS=Homo sapiens GN=HLA-B PE=1 SV=1	HUMAN	3
505	3.48	3.49	15.16	9.836	9.836	sp|Q9Y224|CN166_HUMAN	UPF0568 protein C14orf166 OS=Homo sapiens GN=C14orf166 PE=1 SV=1	HUMAN	2
505	0	1.37	15.03	4.145	4.145	tr|G3V4C6|G3V4C6_HUMAN	UPF0568 protein C14orf166 OS=Homo sapiens GN=C14orf166 PE=1 SV=1	HUMAN	1
505	0	1.37	6.202	6.202	6.202	tr|H0YJB9|H0YJB9_HUMAN	UPF0568 protein C14orf166 (Fragment) OS=Homo sapiens GN=C14orf166 PE=1 SV=1	HUMAN	1
506	3.48	3.48	13.43	2.302	2.302	sp|Q9NS15|LTBP3_HUMAN	Latent-transforming growth factor beta-binding protein 3 OS=Homo sapiens GN=LTBP3 PE=1 SV=4	HUMAN	2
506	0	3.48	14	2.641	2.641	tr|E9PKW1|E9PKW1_HUMAN	Latent-transforming growth factor beta-binding protein 3 (Fragment) OS=Homo sapiens GN=LTBP3 PE=1 SV=4	HUMAN	2
506	0	1.37	11.91	1.874	1.874	tr|H0YC99|H0YC99_HUMAN	Latent-transforming growth factor beta-binding protein 3 (Fragment) OS=Homo sapiens GN=LTBP3 PE=1 SV=1	HUMAN	1
506	0	1.37	14.73	2.319	2.319	tr|E9PJR2|E9PJR2_HUMAN	Latent-transforming growth factor beta-binding protein 3 OS=Homo sapiens GN=LTBP3 PE=1 SV=1	HUMAN	1
507	3.48	3.48	14.68	14.68	11.47	sp|P10301|RRAS_HUMAN	Ras-related protein R-Ras OS=Homo sapiens GN=RRAS PE=1 SV=1	HUMAN	2
508	3.47	3.48	35.39	23.6	18.54	sp|P62913|RL11_HUMAN	60S ribosomal protein L11 OS=Homo sapiens GN=RPL11 PE=1 SV=2	HUMAN	3
508	0	2.87	24.14	12.07	12.07	tr|Q5VVC8|Q5VVC8_HUMAN	60S ribosomal protein L11 (Fragment) OS=Homo sapiens GN=RPL11 PE=1 SV=1	HUMAN	2
508	0	2.87	25.95	16.03	16.03	tr|Q5VVC9|Q5VVC9_HUMAN	60S ribosomal protein L11 (Fragment) OS=Homo sapiens GN=RPL11 PE=1 SV=1	HUMAN	2
509	3.46	3.49	20.37	11.11	5.967	tr|E9PEX6|E9PEX6_HUMAN	Dihydrolipoyl dehydrogenase, mitochondrial OS=Homo sapiens GN=DLD PE=1 SV=1	HUMAN	2
509	0	3.49	19.45	10.61	5.697	sp|P09622|DLDH_HUMAN	Dihydrolipoyl dehydrogenase, mitochondrial OS=Homo sapiens GN=DLD PE=1 SV=2	HUMAN	2
510	3.46	3.46	28.17	13.38	9.155	sp|P26885|FKBP2_HUMAN	Peptidyl-prolyl cis-trans isomerase FKBP2 OS=Homo sapiens GN=FKBP2 PE=1 SV=2	HUMAN	2
511	3.42	3.42	34.85	30.3	24.24	sp|P25398|RS12_HUMAN	40S ribosomal protein S12 OS=Homo sapiens GN=RPS12 PE=1 SV=3	HUMAN	3
512	3.41	3.42	6.109	2.894	2.572	sp|Q9NYU2|UGGG1_HUMAN	UDP-glucose:glycoprotein glucosyltransferase 1 OS=Homo sapiens GN=UGGT1 PE=1 SV=3	HUMAN	4
513	3.4	3.4	26.06	20	14.55	sp|P46783|RS10_HUMAN	40S ribosomal protein S10 OS=Homo sapiens GN=RPS10 PE=1 SV=1	HUMAN	2
513	0.03	2.08	8.392	8.392	3.147	tr|S4R435|S4R435_HUMAN	Protein RPS10-NUDT3 (Fragment) OS=Homo sapiens GN=RPS10-NUDT3 PE=3 SV=1	HUMAN	1
513	0	2.03	10.47	10.47	5.233	tr|F6U211|F6U211_HUMAN	40S ribosomal protein S10 OS=Homo sapiens GN=RPS10 PE=4 SV=1	HUMAN	1
514	3.37	3.37	37.93	28.28	23.45	tr|A0A087WUL2|A0A087WUL2_HUMAN	Proteasome subunit beta type-3 (Fragment) OS=Homo sapiens GN=PSMB3 PE=1 SV=1	HUMAN	2
514	0	3.37	26.83	20	16.59	sp|P49720|PSB3_HUMAN	Proteasome subunit beta type-3 OS=Homo sapiens GN=PSMB3 PE=1 SV=2	HUMAN	2
514	0	2.21	34.82	22.32	16.07	tr|A0A087WY10|A0A087WY10_HUMAN	Proteasome subunit beta type-3 OS=Homo sapiens GN=PSMB3 PE=1 SV=1	HUMAN	1
514	0	2.21	36.45	23.36	16.82	tr|A0A087WXQ8|A0A087WXQ8_HUMAN	Proteasome subunit beta type-3 OS=Homo sapiens GN=PSMB3 PE=1 SV=1	HUMAN	1
515	3.37	3.37	17.02	17.02	17.02	tr|C4P0D8|C4P0D8_HUMAN	Disrupted in schizophrenia 1 isoform 51 OS=Homo sapiens GN=DISC1 PE=2 SV=1	HUMAN	2
515	0	3.37	17.2	17.2	17.2	tr|C4P0D6|C4P0D6_HUMAN	Disrupted in schizophrenia 1 isoform 49 OS=Homo sapiens GN=DISC1 PE=2 SV=1	HUMAN	2
515	0	3.37	23.19	23.19	23.19	tr|C4P0D4|C4P0D4_HUMAN	Disrupted in schizophrenia 1 isoform 47 OS=Homo sapiens GN=DISC1 PE=2 SV=1	HUMAN	2
515	0	3.37	11.03	11.03	11.03	sp|Q99598|TSNAX_HUMAN	Translin-associated protein X OS=Homo sapiens GN=TSNAX PE=1 SV=1	HUMAN	2
515	0	2	25	25	25	tr|Q9NRI2|Q9NRI2_HUMAN	Disrupted in schizophrenia 1 isoform 52 (Fragment) OS=Homo sapiens GN=TRAX PE=2 SV=1	HUMAN	1
515	0	2	6.135	6.135	6.135	tr|Q5VVQ1|Q5VVQ1_HUMAN	Translin-associated protein X (Fragment) OS=Homo sapiens GN=TSNAX PE=4 SV=1	HUMAN	1
516	3.37	3.37	19.18	19.18	19.18	sp|P01034|CYTC_HUMAN	Cystatin-C OS=Homo sapiens GN=CST3 PE=1 SV=1	HUMAN	3
517	3.36	3.44	51.49	33.66	28.71	tr|C9JFR7|C9JFR7_HUMAN	Cytochrome c (Fragment) OS=Homo sapiens GN=CYCS PE=1 SV=1	HUMAN	3
517	0	3.44	49.52	32.38	27.62	sp|P99999|CYC_HUMAN	Cytochrome c OS=Homo sapiens GN=CYCS PE=1 SV=2	HUMAN	3
518	3.35	3.35	24.77	24.77	11.93	sp|P00492|HPRT_HUMAN	Hypoxanthine-guanine phosphoribosyltransferase OS=Homo sapiens GN=HPRT1 PE=1 SV=2	HUMAN	2
519	3.33	3.33	16.61	6.387	4.562	sp|P50990|TCPQ_HUMAN	T-complex protein 1 subunit theta OS=Homo sapiens GN=CCT8 PE=1 SV=4	HUMAN	2
519	0	1.36	16.1	4.644	4.644	tr|H7C4C8|H7C4C8_HUMAN	T-complex protein 1 subunit theta (Fragment) OS=Homo sapiens GN=CCT8 PE=1 SV=1	HUMAN	1
520	3.31	3.32	26.17	13.42	13.42	tr|J3KPX7|J3KPX7_HUMAN	Prohibitin-2 OS=Homo sapiens GN=PHB2 PE=1 SV=2	HUMAN	3
520	0	3.32	29.21	14.98	14.98	tr|F5GY37|F5GY37_HUMAN	Prohibitin-2 OS=Homo sapiens GN=PHB2 PE=1 SV=1	HUMAN	3
520	0	3.32	26.09	13.38	13.38	sp|Q99623|PHB2_HUMAN	Prohibitin-2 OS=Homo sapiens GN=PHB2 PE=1 SV=2	HUMAN	3
520	0	1.79	30.99	13.15	13.15	tr|F5H3X6|F5H3X6_HUMAN	Prohibitin-2 (Fragment) OS=Homo sapiens GN=PHB2 PE=1 SV=2	HUMAN	2
520	0	1.35	19.54	19.54	19.54	tr|F5H2D2|F5H2D2_HUMAN	Prohibitin-2 OS=Homo sapiens GN=PHB2 PE=1 SV=1	HUMAN	1
520	0	1.35	15.18	15.18	15.18	tr|F5H0C5|F5H0C5_HUMAN	Prohibitin-2 OS=Homo sapiens GN=PHB2 PE=1 SV=1	HUMAN	1
521	3.3	3.3	27.76	6.684	6.684	tr|J3KNW4|J3KNW4_HUMAN	Four and a half LIM domains protein 2 OS=Homo sapiens GN=FHL2 PE=1 SV=1	HUMAN	3
521	0	3.3	22.03	6.582	6.582	tr|A0A0A0MSG2|A0A0A0MSG2_HUMAN	Four and a half LIM domains protein 2 OS=Homo sapiens GN=FHL2 PE=1 SV=1	HUMAN	3
521	0	3.3	31.18	9.319	9.319	sp|Q14192|FHL2_HUMAN	Four and a half LIM domains protein 2 OS=Homo sapiens GN=FHL2 PE=1 SV=3	HUMAN	3
522	3.3	3.3	29.06	22.22	22.22	tr|A0A087WYL9|A0A087WYL9_HUMAN	Ig kappa chain C region OS=Homo sapiens GN=IGKC PE=1 SV=1	HUMAN	2
522	0	3.3	29.06	22.22	22.22	tr|A0A087WWV8|A0A087WWV8_HUMAN	Protein IGKV1-8 OS=Homo sapiens GN=IGKV1-8 PE=4 SV=1	HUMAN	2
522	0	3.3	22.51	22.51	22.51	tr|A0A087X130|A0A087X130_HUMAN	Ig kappa chain C region OS=Homo sapiens GN=IGKC PE=1 SV=1	HUMAN	2
522	0	3.3	22.32	22.32	22.32	tr|A0A087WZW8|A0A087WZW8_HUMAN	Protein IGKV3-11 OS=Homo sapiens GN=IGKV3-11 PE=1 SV=1	HUMAN	2
522	0	3.3	22.03	22.03	22.03	tr|A0A087WTX5|A0A087WTX5_HUMAN	Ig kappa chain C region OS=Homo sapiens GN=IGKC PE=1 SV=1	HUMAN	2
522	0	3.3	48.6	48.6	48.6	tr|A0A075B6H6|A0A075B6H6_HUMAN	Ig kappa chain C region (Fragment) OS=Homo sapiens GN=IGKC PE=1 SV=1	HUMAN	2
522	0	3.3	49.06	49.06	49.06	sp|P01834|IGKC_HUMAN	Ig kappa chain C region OS=Homo sapiens GN=IGKC PE=1 SV=1	HUMAN	2
523	3.28	3.28	31.76	25.68	13.51	sp|Q04837|SSBP_HUMAN	Single-stranded DNA-binding protein, mitochondrial OS=Homo sapiens GN=SSBP1 PE=1 SV=1	HUMAN	2
523	0	3.1	21.48	14.81	14.81	tr|E7EUY5|E7EUY5_HUMAN	Single-stranded DNA-binding protein, mitochondrial (Fragment) OS=Homo sapiens GN=SSBP1 PE=1 SV=1	HUMAN	2
523	0	3.1	23.97	16.53	16.53	tr|C9K0U8|C9K0U8_HUMAN	Single-stranded DNA-binding protein, mitochondrial (Fragment) OS=Homo sapiens GN=SSBP1 PE=1 SV=1	HUMAN	2
523	0	2	42.86	42.86	42.86	tr|C9J8J0|C9J8J0_HUMAN	Single-stranded DNA-binding protein, mitochondrial (Fragment) OS=Homo sapiens GN=SSBP1 PE=1 SV=1	HUMAN	1
524	3.27	3.27	31.11	20.74	13.33	sp|Q01469|FABP5_HUMAN	Fatty acid-binding protein, epidermal OS=Homo sapiens GN=FABP5 PE=1 SV=3	HUMAN	2
525	3.26	3.26	22.69	22.69	22.69	tr|M0R261|M0R261_HUMAN	6-phosphogluconolactonase (Fragment) OS=Homo sapiens GN=PGLS PE=1 SV=1	HUMAN	3
525	0	3.26	18.99	18.99	18.99	sp|O95336|6PGL_HUMAN	6-phosphogluconolactonase OS=Homo sapiens GN=PGLS PE=1 SV=2	HUMAN	3
525	0	2	17.69	17.69	17.69	tr|M0R1L2|M0R1L2_HUMAN	6-phosphogluconolactonase (Fragment) OS=Homo sapiens GN=PGLS PE=1 SV=1	HUMAN	1
525	0	2	14.53	14.53	14.53	tr|M0R0U3|M0R0U3_HUMAN	6-phosphogluconolactonase OS=Homo sapiens GN=PGLS PE=1 SV=1	HUMAN	1
526	3.25	3.25	25.3	15.26	4.217	sp|Q15389|ANGP1_HUMAN	Angiopoietin-1 OS=Homo sapiens GN=ANGPT1 PE=1 SV=2	HUMAN	2
526	0	2.58	23.15	12.75	3.356	tr|B4DTQ9|B4DTQ9_HUMAN	Angiopoietin-1 OS=Homo sapiens GN=ANGPT1 PE=1 SV=1	HUMAN	1
526	0	2.57	21.21	12.79	3.367	tr|E7ERK4|E7ERK4_HUMAN	Angiopoietin-1 OS=Homo sapiens GN=ANGPT1 PE=1 SV=1	HUMAN	1
527	3.24	3.24	6.978	3.237	2.086	sp|P08581|MET_HUMAN	Hepatocyte growth factor receptor OS=Homo sapiens GN=MET PE=1 SV=4	HUMAN	2
528	3.21	3.21	13.77	7.085	4.858	sp|P54578|UBP14_HUMAN	Ubiquitin carboxyl-terminal hydrolase 14 OS=Homo sapiens GN=USP14 PE=1 SV=3	HUMAN	2
528	0	3.21	12.28	7.813	5.357	tr|A6NJA2|A6NJA2_HUMAN	Ubiquitin carboxyl-terminal hydrolase OS=Homo sapiens GN=USP14 PE=1 SV=2	HUMAN	2
528	0	3.21	11.39	7.246	4.969	tr|A0A0A6YYH3|A0A0A6YYH3_HUMAN	Ubiquitin carboxyl-terminal hydrolase 14 OS=Homo sapiens GN=USP14 PE=1 SV=1	HUMAN	2
528	0	2	65	65	65	tr|J3QQT6|J3QQT6_HUMAN	Ubiquitin carboxyl-terminal hydrolase 14 (Fragment) OS=Homo sapiens GN=USP14 PE=1 SV=1	HUMAN	1
528	0	2	46.43	46.43	46.43	tr|J3KS55|J3KS55_HUMAN	Ubiquitin carboxyl-terminal hydrolase 14 (Fragment) OS=Homo sapiens GN=USP14 PE=1 SV=1	HUMAN	1
529	3.2	3.26	18.24	12.94	8.235	sp|P62873|GBB1_HUMAN	Guanine nucleotide-binding protein G(I)/G(S)/G(T) subunit beta-1 OS=Homo sapiens GN=GNB1 PE=1 SV=3	HUMAN	2
529	0	3.22	31.9	23.93	17.18	tr|F6X3N5|F6X3N5_HUMAN	Guanine nucleotide-binding protein G(I)/G(S)/G(T) subunit beta-1 (Fragment) OS=Homo sapiens GN=GNB1 PE=1 SV=1	HUMAN	2
529	0	3.22	31.52	23.64	16.97	tr|F6UT28|F6UT28_HUMAN	Guanine nucleotide-binding protein G(I)/G(S)/G(T) subunit beta-1 (Fragment) OS=Homo sapiens GN=GNB1 PE=1 SV=1	HUMAN	2
529	0	3.22	36.45	36.45	26.17	tr|B1AKQ8|B1AKQ8_HUMAN	Guanine nucleotide-binding protein G(I)/G(S)/G(T) subunit beta-1 (Fragment) OS=Homo sapiens GN=GNB1 PE=1 SV=4	HUMAN	2
530	3.18	3.84	22.03	15.03	15.03	sp|P47755|CAZA2_HUMAN	F-actin-capping protein subunit alpha-2 OS=Homo sapiens GN=CAPZA2 PE=1 SV=3	HUMAN	3
530	0	2.6	27.59	16.09	16.09	tr|F8W9N7|F8W9N7_HUMAN	F-actin-capping protein subunit alpha-2 OS=Homo sapiens GN=CAPZA2 PE=1 SV=1	HUMAN	2
530	0	2.6	32.88	19.18	19.18	tr|C9JUG7|C9JUG7_HUMAN	F-actin-capping protein subunit alpha-2 OS=Homo sapiens GN=CAPZA2 PE=1 SV=1	HUMAN	2
531	3.18	3.18	9.726	4.255	4.255	sp|P17813|EGLN_HUMAN	Endoglin OS=Homo sapiens GN=ENG PE=1 SV=2	HUMAN	2
532	3.17	3.17	24.91	18.69	15.57	sp|Q15181|IPYR_HUMAN	Inorganic pyrophosphatase OS=Homo sapiens GN=PPA1 PE=1 SV=2	HUMAN	3
533	3.13	3.13	14.88	12.04	5.689	sp|Q9NR12|PDLI7_HUMAN	PDZ and LIM domain protein 7 OS=Homo sapiens GN=PDLIM7 PE=1 SV=1	HUMAN	2
533	0	2.44	22.56	22.56	7.692	tr|H7BYK4|H7BYK4_HUMAN	PDZ and LIM domain protein 7 (Fragment) OS=Homo sapiens GN=PDLIM7 PE=1 SV=1	HUMAN	1
533	0	2.44	15.33	15.33	5.226	tr|D6RH06|D6RH06_HUMAN	PDZ and LIM domain protein 7 (Fragment) OS=Homo sapiens GN=PDLIM7 PE=1 SV=1	HUMAN	1
533	0	2.44	25.43	25.43	8.671	tr|D6RF83|D6RF83_HUMAN	PDZ and LIM domain protein 7 (Fragment) OS=Homo sapiens GN=PDLIM7 PE=1 SV=1	HUMAN	1
533	0	2.34	37.78	37.78	16.67	tr|D6RAN1|D6RAN1_HUMAN	PDZ and LIM domain protein 7 (Fragment) OS=Homo sapiens GN=PDLIM7 PE=1 SV=1	HUMAN	1
534	3.11	3.11	54.08	33.67	33.67	sp|P01040|CYTA_HUMAN	Cystatin-A OS=Homo sapiens GN=CSTA PE=1 SV=1	HUMAN	2
534	0	3.11	63.49	52.38	52.38	tr|C9J0E4|C9J0E4_HUMAN	Cystatin-A OS=Homo sapiens GN=CSTA PE=1 SV=1	HUMAN	2
535	3.1	3.1	25.04	1.418	1.418	tr|A0A0A0MRV0|A0A0A0MRV0_HUMAN	Ribosome-binding protein 1 OS=Homo sapiens GN=RRBP1 PE=1 SV=1	HUMAN	2
535	0	3.1	24.33	1.418	1.418	sp|Q9P2E9|RRBP1_HUMAN	Ribosome-binding protein 1 OS=Homo sapiens GN=RRBP1 PE=1 SV=4	HUMAN	2
535	0	3.1	16.38	2.141	2.141	tr|A0A087WVV2|A0A087WVV2_HUMAN	Ribosome-binding protein 1 OS=Homo sapiens GN=RRBP1 PE=1 SV=1	HUMAN	2
535	0	3.06	10.65	2.663	2.663	tr|F8W7S5|F8W7S5_HUMAN	Ribosome-binding protein 1 OS=Homo sapiens GN=RRBP1 PE=1 SV=1	HUMAN	2
536	3.09	3.09	11.85	4.618	4.618	tr|X6R8A1|X6R8A1_HUMAN	Carboxypeptidase OS=Homo sapiens GN=CTSA PE=1 SV=1	HUMAN	2
536	0	3.09	12.27	4.782	4.782	tr|X6R5C5|X6R5C5_HUMAN	Carboxypeptidase OS=Homo sapiens GN=CTSA PE=1 SV=1	HUMAN	2
536	0	3.09	12.29	4.792	4.792	sp|P10619|PPGB_HUMAN	Lysosomal protective protein OS=Homo sapiens GN=CTSA PE=1 SV=2	HUMAN	2
536	0	2	13.85	3.896	3.896	tr|U3KQU6|U3KQU6_HUMAN	Lysosomal protective protein OS=Homo sapiens GN=CTSA PE=1 SV=1	HUMAN	1
536	0	2	29.36	8.257	8.257	tr|U3KQ41|U3KQ41_HUMAN	Lysosomal protective protein (Fragment) OS=Homo sapiens GN=CTSA PE=1 SV=4	HUMAN	1
536	0	2	19.51	10.98	10.98	tr|U3KQF1|U3KQF1_HUMAN	Lysosomal protective protein OS=Homo sapiens GN=CTSA PE=1 SV=1	HUMAN	1
537	3.04	3.04	22.77	21.78	21.78	sp|P31151|S10A7_HUMAN	Protein S100-A7 OS=Homo sapiens GN=S100A7 PE=1 SV=4	HUMAN	2
537	0	1.72	10.89	10.89	10.89	sp|Q86SG5|S1A7A_HUMAN	Protein S100-A7A OS=Homo sapiens GN=S100A7A PE=1 SV=3	HUMAN	1
538	3.03	3.03	14.11	7.362	7.362	sp|Q15717|ELAV1_HUMAN	ELAV-like protein 1 OS=Homo sapiens GN=ELAVL1 PE=1 SV=2	HUMAN	2
538	0	1.67	14.38	8.497	8.497	tr|M0QZR9|M0QZR9_HUMAN	ELAV-like protein 1 OS=Homo sapiens GN=ELAVL1 PE=1 SV=1	HUMAN	1
539	3.02	3.02	5.565	3.928	3.928	tr|A6NKB8|A6NKB8_HUMAN	Aminopeptidase B OS=Homo sapiens GN=RNPEP PE=1 SV=1	HUMAN	2
539	0	3.02	5.231	3.692	3.692	sp|Q9H4A4|AMPB_HUMAN	Aminopeptidase B OS=Homo sapiens GN=RNPEP PE=1 SV=2	HUMAN	2
540	3	3.03	9.187	4.959	2.927	sp|Q86VP6|CAND1_HUMAN	Cullin-associated NEDD8-dissociated protein 1 OS=Homo sapiens GN=CAND1 PE=1 SV=2	HUMAN	3
541	3	3	15.25	7.627	7.627	sp|P41091|IF2G_HUMAN	Eukaryotic translation initiation factor 2 subunit 3 OS=Homo sapiens GN=EIF2S3 PE=1 SV=3	HUMAN	3
542	3	3	23.87	18.93	15.64	sp|Q96CG8|CTHR1_HUMAN	Collagen triple helix repeat-containing protein 1 OS=Homo sapiens GN=CTHRC1 PE=1 SV=1	HUMAN	3
542	0	2.15	24.78	24.78	17.7	tr|E5RK99|E5RK99_HUMAN	Collagen triple helix repeat-containing protein 1 OS=Homo sapiens GN=CTHRC1 PE=1 SV=1	HUMAN	2
543	2.99	2.99	36.6	21.65	17.53	sp|P62081|RS7_HUMAN	40S ribosomal protein S7 OS=Homo sapiens GN=RPS7 PE=1 SV=1	HUMAN	2
543	0	2.98	29.95	22.46	18.18	tr|B5MCP9|B5MCP9_HUMAN	40S ribosomal protein S7 OS=Homo sapiens GN=RPS7 PE=1 SV=1	HUMAN	2
544	2.98	2.98	14.46	6.618	6.618	sp|Q8NC51|PAIRB_HUMAN	Plasminogen activator inhibitor 1 RNA-binding protein OS=Homo sapiens GN=SERBP1 PE=1 SV=2	HUMAN	2
545	2.96	6.43	39.92	26.21	17.74	sp|P31947|1433S_HUMAN	14-3-3 protein sigma OS=Homo sapiens GN=SFN PE=1 SV=1	HUMAN	4
546	2.96	2.96	8.054	3.766	2.615	sp|O00339|MATN2_HUMAN	Matrilin-2 OS=Homo sapiens GN=MATN2 PE=1 SV=4	HUMAN	2
546	0	2.82	9.167	3.472	3.472	tr|H0YBJ4|H0YBJ4_HUMAN	Matrilin-2 (Fragment) OS=Homo sapiens GN=MATN2 PE=1 SV=1	HUMAN	2
546	0	1.37	15.3	8.197	8.197	tr|H0YBN2|H0YBN2_HUMAN	Matrilin-2 (Fragment) OS=Homo sapiens GN=MATN2 PE=1 SV=1	HUMAN	1
546	0	1.28	5.682	5.682	5.682	tr|H0YBU5|H0YBU5_HUMAN	Matrilin-2 (Fragment) OS=Homo sapiens GN=MATN2 PE=1 SV=1	HUMAN	1
546	0	1.28	7.634	7.634	7.634	tr|H0YBF2|H0YBF2_HUMAN	Matrilin-2 (Fragment) OS=Homo sapiens GN=MATN2 PE=1 SV=1	HUMAN	1
547	2.95	2.95	24.44	16.54	8.271	sp|P62424|RL7A_HUMAN	60S ribosomal protein L7a OS=Homo sapiens GN=RPL7A PE=1 SV=2	HUMAN	2
547	0	2.45	30.89	19.9	8.377	tr|Q5T8U3|Q5T8U3_HUMAN	60S ribosomal protein L7a (Fragment) OS=Homo sapiens GN=RPL7A PE=1 SV=1	HUMAN	1
548	2.94	16.52	45.3	20.96	16.63	tr|K7ERE3|K7ERE3_HUMAN	Keratin, type I cytoskeletal 13 OS=Homo sapiens GN=KRT13 PE=1 SV=1	HUMAN	15
548	0	17.33	22.15	15.13	12.94	sp|P19012|K1C15_HUMAN	Keratin, type I cytoskeletal 15 OS=Homo sapiens GN=KRT15 PE=1 SV=3	HUMAN	9
548	0	16.52	41.05	19	15.07	sp|P13646|K1C13_HUMAN	Keratin, type I cytoskeletal 13 OS=Homo sapiens GN=KRT13 PE=1 SV=4	HUMAN	15
548	0	11.85	52.73	40.61	35.15	tr|K7EMD9|K7EMD9_HUMAN	Keratin, type I cytoskeletal 13 (Fragment) OS=Homo sapiens GN=KRT13 PE=1 SV=1	HUMAN	13
549	2.94	3.06	12.08	4.23	3.474	tr|D6RAR4|D6RAR4_HUMAN	Hepatocyte growth factor activator OS=Homo sapiens GN=HGFAC PE=1 SV=1	HUMAN	2
549	0	3.06	12.21	4.275	3.511	sp|Q04756|HGFA_HUMAN	Hepatocyte growth factor activator OS=Homo sapiens GN=HGFAC PE=1 SV=1	HUMAN	2
550	2.91	2.95	13.96	11.71	9.459	tr|A0A087WYR3|A0A087WYR3_HUMAN	Tumor protein D54 OS=Homo sapiens GN=TPD52L2 PE=1 SV=1	HUMAN	2
550	0	2.95	15.05	12.62	10.19	sp|O43399|TPD54_HUMAN	Tumor protein D54 OS=Homo sapiens GN=TPD52L2 PE=1 SV=2	HUMAN	2
550	0	2.03	13.16	9.868	6.579	tr|A0A087WZ51|A0A087WZ51_HUMAN	Tumor protein D54 OS=Homo sapiens GN=TPD52L2 PE=1 SV=1	HUMAN	1
551	2.91	2.91	15.83	7.917	7.917	sp|Q96C19|EFHD2_HUMAN	EF-hand domain-containing protein D2 OS=Homo sapiens GN=EFHD2 PE=1 SV=1	HUMAN	2
551	0	2.91	16.2	10.61	10.61	tr|H0Y4Y4|H0Y4Y4_HUMAN	EF-hand domain-containing protein D2 (Fragment) OS=Homo sapiens GN=EFHD2 PE=1 SV=1	HUMAN	2
552	2.9	3.54	26.55	21.09	17.09	sp|Q6ZVX7|FBX50_HUMAN	F-box only protein 50 OS=Homo sapiens GN=NCCRP1 PE=1 SV=1	HUMAN	3
553	2.87	2.87	25.61	13.17	5.854	sp|P43034|LIS1_HUMAN	Platelet-activating factor acetylhydrolase IB subunit alpha OS=Homo sapiens GN=PAFAH1B1 PE=1 SV=2	HUMAN	2
554	2.87	2.87	27.25	16.01	9.27	sp|Q15365|PCBP1_HUMAN	Poly(rC)-binding protein 1 OS=Homo sapiens GN=PCBP1 PE=1 SV=2	HUMAN	3
555	2.86	240.01	62.36	55.16	52.78	tr|E7ENL6|E7ENL6_HUMAN	Collagen alpha-3(VI) chain OS=Homo sapiens GN=COL6A3 PE=1 SV=2	HUMAN	148
556	2.86	2.86	22.97	14.83	14.83	sp|Q8TEA8|DTD1_HUMAN	D-tyrosyl-tRNA(Tyr) deacylase 1 OS=Homo sapiens GN=DTD1 PE=1 SV=2	HUMAN	2
557	2.85	2.85	23.79	15.24	11.52	tr|H3BRK3|H3BRK3_HUMAN	NAD(P)H dehydrogenase [quinone] 1 OS=Homo sapiens GN=NQO1 PE=1 SV=1	HUMAN	2
557	0	2.85	22.77	20.3	15.35	tr|B4DLR8|B4DLR8_HUMAN	NAD(P)H dehydrogenase [quinone] 1 OS=Homo sapiens GN=NQO1 PE=1 SV=1	HUMAN	2
557	0	2.85	16.79	14.96	11.31	sp|P15559|NQO1_HUMAN	NAD(P)H dehydrogenase [quinone] 1 OS=Homo sapiens GN=NQO1 PE=1 SV=1	HUMAN	2
557	0	2.68	14.23	12.25	12.25	tr|H3BNV2|H3BNV2_HUMAN	NAD(P)H dehydrogenase [quinone] 1 OS=Homo sapiens GN=NQO1 PE=1 SV=1	HUMAN	2
558	2.84	2.84	10.65	3.925	3.925	tr|K7ELL7|K7ELL7_HUMAN	Glucosidase 2 subunit beta OS=Homo sapiens GN=PRKCSH PE=1 SV=1	HUMAN	2
558	0	2.84	10.8	3.977	3.977	sp|P14314|GLU2B_HUMAN	Glucosidase 2 subunit beta OS=Homo sapiens GN=PRKCSH PE=1 SV=2	HUMAN	2
559	2.83	2.83	37.57	18.23	12.71	sp|Q13442|HAP28_HUMAN	28 kDa heat- and acid-stable phosphoprotein OS=Homo sapiens GN=PDAP1 PE=1 SV=1	HUMAN	2
560	2.82	2.82	25.34	5.201	5.201	sp|Q96HC4|PDLI5_HUMAN	PDZ and LIM domain protein 5 OS=Homo sapiens GN=PDLIM5 PE=1 SV=5	HUMAN	2
560	0	1.3	34.04	34.04	34.04	tr|D6RGG6|D6RGG6_HUMAN	PDZ and LIM domain protein 5 OS=Homo sapiens GN=PDLIM5 PE=1 SV=1	HUMAN	1
560	0	1.3	42.11	42.11	42.11	tr|D6RAA1|D6RAA1_HUMAN	PDZ and LIM domain protein 5 OS=Homo sapiens GN=PDLIM5 PE=1 SV=1	HUMAN	1
561	2.79	2.79	20	8.75	8.75	sp|P51858|HDGF_HUMAN	Hepatoma-derived growth factor OS=Homo sapiens GN=HDGF PE=1 SV=1	HUMAN	3
562	2.77	5.79	12.43	3.261	1.97	sp|Q02388|CO7A1_HUMAN	Collagen alpha-1(VII) chain OS=Homo sapiens GN=COL7A1 PE=1 SV=2	HUMAN	4
563	2.77	2.77	34.46	29.05	8.108	sp|P61626|LYSC_HUMAN	Lysozyme C OS=Homo sapiens GN=LYZ PE=1 SV=1	HUMAN	1
563	0	2.28	34.62	26.92	11.54	tr|F8VV32|F8VV32_HUMAN	Lysozyme OS=Homo sapiens GN=LYZ PE=1 SV=1	HUMAN	1
563	0	2.28	26.28	20.44	8.759	tr|A0A0B4J259|A0A0B4J259_HUMAN	Lysozyme C OS=Homo sapiens GN=LYZ PE=4 SV=1	HUMAN	1
564	2.76	2.79	19.32	11.35	4.831	tr|E7ET40|E7ET40_HUMAN	Urokinase-type plasminogen activator OS=Homo sapiens GN=PLAU PE=1 SV=1	HUMAN	2
564	0	2.79	18.56	10.9	4.64	sp|P00749|UROK_HUMAN	Urokinase-type plasminogen activator OS=Homo sapiens GN=PLAU PE=1 SV=2	HUMAN	2
565	2.74	2.77	10.39	5.251	4.022	sp|Q14118|DAG1_HUMAN	Dystroglycan OS=Homo sapiens GN=DAG1 PE=1 SV=2	HUMAN	2
565	0	2	16.84	16.84	16.84	tr|C9JYS1|C9JYS1_HUMAN	Dystroglycan (Fragment) OS=Homo sapiens GN=DAG1 PE=1 SV=4	HUMAN	1
565	0	2	13.68	13.68	13.68	tr|C9JQL4|C9JQL4_HUMAN	Dystroglycan (Fragment) OS=Homo sapiens GN=DAG1 PE=1 SV=1	HUMAN	1
565	0	2	15.09	15.09	15.09	tr|C9J196|C9J196_HUMAN	Dystroglycan (Fragment) OS=Homo sapiens GN=DAG1 PE=1 SV=1	HUMAN	1
566	2.74	2.74	13.28	7.78	5.882	tr|A6NLN1|A6NLN1_HUMAN	Polypyrimidine tract binding protein 1, isoform CRA_b OS=Homo sapiens GN=PTBP1 PE=1 SV=4	HUMAN	2
566	0	2.74	13.18	7.721	5.838	sp|P26599|PTBP1_HUMAN	Polypyrimidine tract-binding protein 1 OS=Homo sapiens GN=PTBP1 PE=1 SV=1	HUMAN	2
566	0	2.68	12.11	12.11	12.11	tr|K7EK45|K7EK45_HUMAN	Polypyrimidine tract-binding protein 1 (Fragment) OS=Homo sapiens GN=PTBP1 PE=1 SV=1	HUMAN	2
567	2.68	2.68	22.2	7.912	5.275	sp|Q13867|BLMH_HUMAN	Bleomycin hydrolase OS=Homo sapiens GN=BLMH PE=1 SV=1	HUMAN	3
567	0	2.66	27.99	11.32	7.547	tr|K7ES02|K7ES02_HUMAN	Bleomycin hydrolase (Fragment) OS=Homo sapiens GN=BLMH PE=1 SV=1	HUMAN	3
567	0	2.1	15.27	9.16	6.489	tr|J3KSD8|J3KSD8_HUMAN	Bleomycin hydrolase (Fragment) OS=Homo sapiens GN=BLMH PE=1 SV=4	HUMAN	2
567	0	1.56	19.48	7.792	4.762	tr|K7ESE8|K7ESE8_HUMAN	Bleomycin hydrolase (Fragment) OS=Homo sapiens GN=BLMH PE=1 SV=1	HUMAN	1
568	2.64	2.64	8.996	6.695	3.138	sp|P04004|VTNC_HUMAN	Vitronectin OS=Homo sapiens GN=VTN PE=1 SV=1	HUMAN	2
569	2.62	2.62	13.57	11.5	8.555	tr|A0A087X0K1|A0A087X0K1_HUMAN	Calcium-binding protein 39 OS=Homo sapiens GN=CAB39 PE=1 SV=1	HUMAN	3
569	0	2.62	13.49	11.44	8.504	sp|Q9Y376|CAB39_HUMAN	Calcium-binding protein 39 OS=Homo sapiens GN=CAB39 PE=1 SV=1	HUMAN	3
569	0	1.58	7.143	3.214	3.214	tr|Q5TAW7|Q5TAW7_HUMAN	Calcium-binding protein 39-like (Fragment) OS=Homo sapiens GN=CAB39L PE=1 SV=1	HUMAN	1
569	0	1.58	5.935	2.671	2.671	sp|Q9H9S4|CB39L_HUMAN	Calcium-binding protein 39-like OS=Homo sapiens GN=CAB39L PE=1 SV=3	HUMAN	1
569	0	1.57	4.663	4.663	4.663	tr|B7ZBJ4|B7ZBJ4_HUMAN	Calcium-binding protein 39-like OS=Homo sapiens GN=CAB39L PE=1 SV=1	HUMAN	1
570	2.61	2.69	12.04	6.204	3.832	sp|O43776|SYNC_HUMAN	Asparagine--tRNA ligase, cytoplasmic OS=Homo sapiens GN=NARS PE=1 SV=1	HUMAN	2
571	2.58	3.24	7.703	4.137	4.137	sp|O75342|LX12B_HUMAN	Arachidonate 12-lipoxygenase, 12R-type OS=Homo sapiens GN=ALOX12B PE=1 SV=1	HUMAN	3
572	2.58	2.7	16.23	6.491	5.274	sp|P55058|PLTP_HUMAN	Phospholipid transfer protein OS=Homo sapiens GN=PLTP PE=1 SV=1	HUMAN	2
573	2.58	2.58	16.89	4.181	4.181	tr|H7C410|H7C410_HUMAN	Glypican-1 (Fragment) OS=Homo sapiens GN=GPC1 PE=1 SV=1	HUMAN	2
573	0	2.58	14.52	4.48	4.48	sp|P35052|GPC1_HUMAN	Glypican-1 OS=Homo sapiens GN=GPC1 PE=1 SV=2	HUMAN	2
573	0	2.58	19.61	6.906	6.906	tr|H7C024|H7C024_HUMAN	Glypican-1 (Fragment) OS=Homo sapiens GN=GPC1 PE=1 SV=1	HUMAN	2
574	2.57	4.02	7.345	2.938	2.938	tr|A0A087WW66|A0A087WW66_HUMAN	26S proteasome non-ATPase regulatory subunit 1 OS=Homo sapiens GN=PSMD1 PE=1 SV=1	HUMAN	3
574	0	4.02	7.345	2.938	2.938	sp|Q99460|PSMD1_HUMAN	26S proteasome non-ATPase regulatory subunit 1 OS=Homo sapiens GN=PSMD1 PE=1 SV=2	HUMAN	3
574	0	2	6.25	6.25	6.25	tr|H7C378|H7C378_HUMAN	26S proteasome non-ATPase regulatory subunit 1 (Fragment) OS=Homo sapiens GN=PSMD1 PE=1 SV=1	HUMAN	1
575	2.57	2.58	17.93	4.781	4.781	tr|F6TLX2|F6TLX2_HUMAN	Glyoxalase domain-containing protein 4 OS=Homo sapiens GN=GLOD4 PE=1 SV=1	HUMAN	2
575	0	2.58	17.89	7.668	7.668	sp|Q9HC38|GLOD4_HUMAN	Glyoxalase domain-containing protein 4 OS=Homo sapiens GN=GLOD4 PE=1 SV=1	HUMAN	2
575	0	2	26.09	11.3	11.3	tr|I3L1I0|I3L1I0_HUMAN	Glyoxalase domain-containing protein 4 (Fragment) OS=Homo sapiens GN=GLOD4 PE=1 SV=1	HUMAN	1
576	2.56	11.67	50.27	36.54	23.08	sp|P09972|ALDOC_HUMAN	Fructose-bisphosphate aldolase C OS=Homo sapiens GN=ALDOC PE=1 SV=2	HUMAN	14
576	0	11.64	44.05	29.17	25	tr|A8MVZ9|A8MVZ9_HUMAN	Fructose-bisphosphate aldolase OS=Homo sapiens GN=ALDOC PE=1 SV=1	HUMAN	14
576	0	8.74	49.63	47.41	37.04	tr|K7EKH5|K7EKH5_HUMAN	Fructose-bisphosphate aldolase (Fragment) OS=Homo sapiens GN=ALDOC PE=1 SV=1	HUMAN	8
576	0	8.74	37.22	35.56	27.78	tr|J3QKP5|J3QKP5_HUMAN	Fructose-bisphosphate aldolase (Fragment) OS=Homo sapiens GN=ALDOC PE=1 SV=2	HUMAN	8
576	0	8.74	38.29	36.57	28.57	tr|J3KSV6|J3KSV6_HUMAN	Fructose-bisphosphate aldolase (Fragment) OS=Homo sapiens GN=ALDOC PE=1 SV=1	HUMAN	8
577	2.55	2.56	68.09	19.68	12.77	tr|Q5W0H4|Q5W0H4_HUMAN	Translationally-controlled tumor protein OS=Homo sapiens GN=TPT1 PE=1 SV=1	HUMAN	3
577	0	2.56	64.97	18.78	12.18	tr|A0A0B4J2C3|A0A0B4J2C3_HUMAN	Translationally-controlled tumor protein OS=Homo sapiens GN=TPT1 PE=4 SV=1	HUMAN	3
577	0	2.56	74.42	21.51	13.95	sp|P13693|TCTP_HUMAN	Translationally-controlled tumor protein OS=Homo sapiens GN=TPT1 PE=1 SV=1	HUMAN	3
578	2.55	2.56	10.7	3.922	3.922	sp|P08243|ASNS_HUMAN	Asparagine synthetase [glutamine-hydrolyzing] OS=Homo sapiens GN=ASNS PE=1 SV=4	HUMAN	2
579	2.55	2.56	8.989	7.64	7.64	tr|C9JGI3|C9JGI3_HUMAN	Thymidine phosphorylase (Fragment) OS=Homo sapiens GN=TYMP PE=1 SV=1	HUMAN	2
579	0	2.56	8.299	7.054	7.054	sp|P19971|TYPH_HUMAN	Thymidine phosphorylase OS=Homo sapiens GN=TYMP PE=1 SV=2	HUMAN	2
580	2.55	2.55	3.764	0.8365	0.8365	sp|Q5D862|FILA2_HUMAN	Filaggrin-2 OS=Homo sapiens GN=FLG2 PE=1 SV=1	HUMAN	2
581	2.55	2.55	11.17	7.45	7.45	sp|P29279|CTGF_HUMAN	Connective tissue growth factor OS=Homo sapiens GN=CTGF PE=1 SV=2	HUMAN	2
582	2.54	2.56	5.437	5.437	5.437	tr|B7Z7P8|B7Z7P8_HUMAN	Eukaryotic peptide chain release factor subunit 1 OS=Homo sapiens GN=ETF1 PE=1 SV=1	HUMAN	2
582	0	2.56	5.263	5.263	5.263	sp|P62495|ERF1_HUMAN	Eukaryotic peptide chain release factor subunit 1 OS=Homo sapiens GN=ETF1 PE=1 SV=3	HUMAN	2
582	0	1.44	6.25	6.25	6.25	tr|I3L492|I3L492_HUMAN	Eukaryotic peptide chain release factor subunit 1 (Fragment) OS=Homo sapiens GN=ETF1 PE=1 SV=1	HUMAN	1
582	0	1.44	10.92	10.92	10.92	tr|D6RJE8|D6RJE8_HUMAN	Eukaryotic peptide chain release factor subunit 1 (Fragment) OS=Homo sapiens GN=ETF1 PE=1 SV=4	HUMAN	1
582	0	1.44	13.68	13.68	13.68	tr|D6RCB3|D6RCB3_HUMAN	Eukaryotic peptide chain release factor subunit 1 OS=Homo sapiens GN=ETF1 PE=1 SV=1	HUMAN	1
583	2.54	2.54	13.88	13.88	13.88	sp|P56537|IF6_HUMAN	Eukaryotic translation initiation factor 6 OS=Homo sapiens GN=EIF6 PE=1 SV=1	HUMAN	2
584	2.53	2.72	13.22	10.97	6.234	sp|O00300|TR11B_HUMAN	Tumor necrosis factor receptor superfamily member 11B OS=Homo sapiens GN=TNFRSF11B PE=1 SV=3	HUMAN	2
585	2.52	2.52	25.87	7.558	7.558	sp|P19883|FST_HUMAN	Follistatin OS=Homo sapiens GN=FST PE=1 SV=2	HUMAN	2
586	2.49	2.49	37.61	24.77	15.14	sp|Q15907|RB11B_HUMAN	Ras-related protein Rab-11B OS=Homo sapiens GN=RAB11B PE=1 SV=4	HUMAN	3
586	0	2.49	36.87	27.27	16.67	tr|H3BSC1|H3BSC1_HUMAN	Ras-related protein Rab-11A OS=Homo sapiens GN=RAB11A PE=1 SV=1	HUMAN	3
586	0	2.49	47.1	34.84	21.29	tr|H3BMH2|H3BMH2_HUMAN	Ras-related protein Rab-11A (Fragment) OS=Homo sapiens GN=RAB11A PE=3 SV=1	HUMAN	3
586	0	2.49	33.8	25	15.28	sp|P62491|RB11A_HUMAN	Ras-related protein Rab-11A OS=Homo sapiens GN=RAB11A PE=1 SV=3	HUMAN	3
587	2.49	2.49	9.612	8.503	4.436	sp|Q15758|AAAT_HUMAN	Neutral amino acid transporter B(0) OS=Homo sapiens GN=SLC1A5 PE=1 SV=2	HUMAN	2
587	0	2.05	7.671	6.301	3.562	tr|M0QXM4|M0QXM4_HUMAN	Amino acid transporter OS=Homo sapiens GN=SLC1A5 PE=1 SV=1	HUMAN	1
587	0	2	6.977	5.039	5.039	tr|M0QX44|M0QX44_HUMAN	Amino acid transporter (Fragment) OS=Homo sapiens GN=SLC1A5 PE=1 SV=4	HUMAN	1
588	2.47	2.47	23.18	15.45	15.45	tr|B5MDF5|B5MDF5_HUMAN	GTP-binding nuclear protein Ran OS=Homo sapiens GN=RAN PE=1 SV=1	HUMAN	3
588	0	2.47	25	16.67	16.67	sp|P62826|RAN_HUMAN	GTP-binding nuclear protein Ran OS=Homo sapiens GN=RAN PE=1 SV=3	HUMAN	3
588	0	2.47	18.38	15.38	15.38	tr|J3KQE5|J3KQE5_HUMAN	GTP-binding nuclear protein Ran (Fragment) OS=Homo sapiens GN=RAN PE=1 SV=1	HUMAN	3
588	0	2.47	21.72	18.18	18.18	tr|F5H018|F5H018_HUMAN	GTP-binding nuclear protein Ran (Fragment) OS=Homo sapiens GN=RAN PE=1 SV=4	HUMAN	3
588	0	1.87	25.24	25.24	25.24	tr|H0YFC6|H0YFC6_HUMAN	GTP-binding nuclear protein Ran (Fragment) OS=Homo sapiens GN=RAN PE=1 SV=1	HUMAN	2
589	2.45	2.47	30.43	20.16	11.07	tr|J3KTL2|J3KTL2_HUMAN	Serine/arginine-rich-splicing factor 1 OS=Homo sapiens GN=SRSF1 PE=1 SV=1	HUMAN	3
589	0	2.47	31.05	20.56	11.29	sp|Q07955|SRSF1_HUMAN	Serine/arginine-rich splicing factor 1 OS=Homo sapiens GN=SRSF1 PE=1 SV=2	HUMAN	3
590	2.45	2.45	6.723	6.723	6.723	sp|O00303|EIF3F_HUMAN	Eukaryotic translation initiation factor 3 subunit F OS=Homo sapiens GN=EIF3F PE=1 SV=1	HUMAN	2
590	0	2	12.1	12.1	12.1	tr|E9PQV8|E9PQV8_HUMAN	Eukaryotic translation initiation factor 3 subunit F OS=Homo sapiens GN=EIF3F PE=1 SV=1	HUMAN	1
591	2.44	2.44	6.012	3.407	3.407	tr|Q5SZU1|Q5SZU1_HUMAN	D-3-phosphoglycerate dehydrogenase OS=Homo sapiens GN=PHGDH PE=1 SV=1	HUMAN	2
591	0	2.44	5.629	3.189	3.189	sp|O43175|SERA_HUMAN	D-3-phosphoglycerate dehydrogenase OS=Homo sapiens GN=PHGDH PE=1 SV=4	HUMAN	2
592	2.43	2.44	20.19	7.886	7.886	tr|D6R9W4|D6R9W4_HUMAN	Drebrin (Fragment) OS=Homo sapiens GN=DBN1 PE=1 SV=1	HUMAN	2
592	0	2.44	9.861	3.852	3.852	sp|Q16643|DREB_HUMAN	Drebrin OS=Homo sapiens GN=DBN1 PE=1 SV=4	HUMAN	2
593	2.42	2.42	11.56	11.56	11.56	tr|M0R0R2|M0R0R2_HUMAN	40S ribosomal protein S5 OS=Homo sapiens GN=RPS5 PE=1 SV=1	HUMAN	2
593	0	2.42	13	13	13	tr|M0R0F0|M0R0F0_HUMAN	40S ribosomal protein S5 (Fragment) OS=Homo sapiens GN=RPS5 PE=1 SV=1	HUMAN	2
593	0	2.42	19.4	19.4	19.4	tr|M0QZN2|M0QZN2_HUMAN	40S ribosomal protein S5 OS=Homo sapiens GN=RPS5 PE=1 SV=1	HUMAN	2
593	0	2.42	12.75	12.75	12.75	sp|P46782|RS5_HUMAN	40S ribosomal protein S5 OS=Homo sapiens GN=RPS5 PE=1 SV=4	HUMAN	2
594	2.41	2.45	7.94	1.502	1.502	tr|B0QY90|B0QY90_HUMAN	Eukaryotic translation initiation factor 3 subunit L OS=Homo sapiens GN=EIF3L PE=1 SV=1	HUMAN	2
594	0	2.45	6.096	1.153	1.153	tr|B0QY89|B0QY89_HUMAN	Eukaryotic translation initiation factor 3 subunit L OS=Homo sapiens GN=EIF3L PE=1 SV=1	HUMAN	2
594	0	2.45	6.56	1.241	1.241	sp|Q9Y262|EIF3L_HUMAN	Eukaryotic translation initiation factor 3 subunit L OS=Homo sapiens GN=EIF3L PE=1 SV=1	HUMAN	2
595	2.41	2.41	23.77	11.21	3.139	sp|Q96CT7|CC124_HUMAN	Coiled-coil domain-containing protein 124 OS=Homo sapiens GN=CCDC124 PE=1 SV=1	HUMAN	1
595	0	2.01	6.801	1.763	1.763	RRRRRtr|H3BPU4|H3BPU4_HUMAN	REVERSED Gamma-tubulin complex component 4 (Fragment) OS=Homo sapiens GN=TUBGCP4 PE=1 SV=1	HUMAN	1
595	0	2.01	4.048	1.049	1.049	RRRRRsp|Q9UGJ1|GCP4_HUMAN	REVERSED Gamma-tubulin complex component 4 OS=Homo sapiens GN=TUBGCP4 PE=1 SV=1	HUMAN	1
595	0	2	16.18	5.147	5.147	tr|M0R2F5|M0R2F5_HUMAN	Coiled-coil domain-containing protein 124 (Fragment) OS=Homo sapiens GN=CCDC124 PE=1 SV=4	HUMAN	1
596	2.4	4.97	10.59	7.526	4.464	sp|Q01813|PFKAP_HUMAN	ATP-dependent 6-phosphofructokinase, platelet type OS=Homo sapiens GN=PFKP PE=1 SV=2	HUMAN	3
596	0	4.04	17.62	17.62	12.38	tr|Q5VSR5|Q5VSR5_HUMAN	ATP-dependent 6-phosphofructokinase, platelet type (Fragment) OS=Homo sapiens GN=PFKP PE=1 SV=1	HUMAN	2
597	2.39	2.39	15.09	7.131	2.322	sp|Q86SR1|GLT10_HUMAN	Polypeptide N-acetylgalactosaminyltransferase 10 OS=Homo sapiens GN=GALNT10 PE=1 SV=2	HUMAN	1
598	2.38	2.38	27.88	27.88	15.38	sp|P52943|CRIP2_HUMAN	Cysteine-rich protein 2 OS=Homo sapiens GN=CRIP2 PE=1 SV=1	HUMAN	1
598	0	2.22	26.56	26.56	16.67	tr|H0YFA4|H0YFA4_HUMAN	Cysteine-rich protein 2 (Fragment) OS=Homo sapiens GN=CRIP2 PE=1 SV=1	HUMAN	1
599	2.37	2.37	6.783	5.47	5.47	sp|Q8N142|PURA1_HUMAN	Adenylosuccinate synthetase isozyme 1 OS=Homo sapiens GN=ADSSL1 PE=1 SV=1	HUMAN	2
600	2.36	2.49	9.345	3.083	1.156	sp|O95373|IPO7_HUMAN	Importin-7 OS=Homo sapiens GN=IPO7 PE=1 SV=1	HUMAN	1
601	2.35	2.35	21.86	7.65	5.191	tr|B3KS98|B3KS98_HUMAN	Eukaryotic translation initiation factor 3 subunit H OS=Homo sapiens GN=EIF3H PE=1 SV=1	HUMAN	1
601	0	2.35	22.92	8.023	5.444	tr|A0A087WZK9|A0A087WZK9_HUMAN	Eukaryotic translation initiation factor 3 subunit H OS=Homo sapiens GN=EIF3H PE=1 SV=1	HUMAN	1
601	0	2.35	22.73	7.955	5.398	sp|O15372|EIF3H_HUMAN	Eukaryotic translation initiation factor 3 subunit H OS=Homo sapiens GN=EIF3H PE=1 SV=1	HUMAN	1
601	0	2.35	11.91	11.91	8.085	tr|E5RGU4|E5RGU4_HUMAN	Eukaryotic translation initiation factor 3 subunit H (Fragment) OS=Homo sapiens GN=EIF3H PE=1 SV=1	HUMAN	1
601	0	1.96	41.3	41.3	41.3	tr|E5RHC7|E5RHC7_HUMAN	Eukaryotic translation initiation factor 3 subunit H OS=Homo sapiens GN=EIF3H PE=1 SV=1	HUMAN	1
601	0	1.96	33.93	33.93	33.93	tr|E5RH59|E5RH59_HUMAN	Eukaryotic translation initiation factor 3 subunit H OS=Homo sapiens GN=EIF3H PE=1 SV=1	HUMAN	1
601	0	1.96	19.59	19.59	19.59	tr|E5RFW7|E5RFW7_HUMAN	Eukaryotic translation initiation factor 3 subunit H (Fragment) OS=Homo sapiens GN=EIF3H PE=1 SV=1	HUMAN	1
601	0	1.96	11.18	11.18	11.18	tr|E5RFH0|E5RFH0_HUMAN	Eukaryotic translation initiation factor 3 subunit H (Fragment) OS=Homo sapiens GN=EIF3H PE=1 SV=1	HUMAN	1
602	2.34	2.34	35.54	28.1	9.091	tr|A0A024QZ42|A0A024QZ42_HUMAN	HCG1985580, isoform CRA_c OS=Homo sapiens GN=PDCD6 PE=1 SV=1	HUMAN	1
602	0	2.34	22.51	17.8	5.759	sp|O75340|PDCD6_HUMAN	Programmed cell death protein 6 OS=Homo sapiens GN=PDCD6 PE=1 SV=1	HUMAN	1
602	0	2	10.58	10.58	10.58	tr|H0Y9X3|H0Y9X3_HUMAN	Programmed cell death protein 6 (Fragment) OS=Homo sapiens GN=PDCD6 PE=1 SV=1	HUMAN	1
602	0	2	8.943	8.943	8.943	tr|A0A087WZ38|A0A087WZ38_HUMAN	Programmed cell death protein 6 OS=Homo sapiens GN=PDCD6 PE=1 SV=1	HUMAN	1
603	2.32	2.91	19.27	12.84	7.034	sp|O75436|VP26A_HUMAN	Vacuolar protein sorting-associated protein 26A OS=Homo sapiens GN=VPS26A PE=1 SV=2	HUMAN	2
603	0	2.71	18.58	12.83	10.18	tr|S4R3Q6|S4R3Q6_HUMAN	Vacuolar protein sorting-associated protein 26A OS=Homo sapiens GN=VPS26A PE=1 SV=1	HUMAN	2
604	2.32	2.33	30.1	10.03	10.03	sp|O43396|TXNL1_HUMAN	Thioredoxin-like protein 1 OS=Homo sapiens GN=TXNL1 PE=1 SV=3	HUMAN	2
605	2.3	2.31	14.18	4.776	3.284	tr|A0A087WW43|A0A087WW43_HUMAN	Inter-alpha-trypsin inhibitor heavy chain H3 OS=Homo sapiens GN=ITIH3 PE=1 SV=1	HUMAN	1
605	0	2.31	10.67	3.596	2.472	sp|Q06033|ITIH3_HUMAN	Inter-alpha-trypsin inhibitor heavy chain H3 OS=Homo sapiens GN=ITIH3 PE=1 SV=2	HUMAN	1
605	0	2.31	9.742	4.585	3.152	tr|E7ET33|E7ET33_HUMAN	Inter-alpha-trypsin inhibitor heavy chain H3 OS=Homo sapiens GN=ITIH3 PE=1 SV=1	HUMAN	1
606	2.3	2.3	33.72	15.12	15.12	tr|K7EL96|K7EL96_HUMAN	Perilipin-3 (Fragment) OS=Homo sapiens GN=PLIN3 PE=1 SV=4	HUMAN	2
606	0	2.3	13.36	5.991	5.991	sp|O60664|PLIN3_HUMAN	Perilipin-3 OS=Homo sapiens GN=PLIN3 PE=1 SV=3	HUMAN	2
606	0	2.3	19.64	15.48	15.48	tr|K7ER39|K7ER39_HUMAN	Perilipin-3 (Fragment) OS=Homo sapiens GN=PLIN3 PE=1 SV=1	HUMAN	2
607	2.29	2.31	19.49	10.83	10.83	sp|Q99436|PSB7_HUMAN	Proteasome subunit beta type-7 OS=Homo sapiens GN=PSMB7 PE=1 SV=1	HUMAN	2
607	0	2.02	9.048	9.048	9.048	tr|Q5TBG5|Q5TBG5_HUMAN	Proteasome subunit beta type (Fragment) OS=Homo sapiens GN=PSMB7 PE=1 SV=1	HUMAN	1
608	2.29	2.29	12.15	8.681	5.903	tr|G3XAM2|G3XAM2_HUMAN	Complement factor I OS=Homo sapiens GN=CFI PE=1 SV=1	HUMAN	3
608	0	2.29	11.84	8.46	5.753	tr|E7ETH0|E7ETH0_HUMAN	Complement factor I OS=Homo sapiens GN=CFI PE=1 SV=1	HUMAN	3
608	0	2.29	12.01	8.576	5.832	sp|P05156|CFAI_HUMAN	Complement factor I OS=Homo sapiens GN=CFI PE=1 SV=2	HUMAN	3
609	2.27	2.27	26.78	26.78	16.39	sp|Q13185|CBX3_HUMAN	Chromobox protein homolog 3 OS=Homo sapiens GN=CBX3 PE=1 SV=4	HUMAN	2
610	2.26	2.27	18.18	16.02	6.494	tr|K9J957|K9J957_HUMAN	Proteasome activator complex subunit 3 OS=Homo sapiens GN=PSME3 PE=1 SV=1	HUMAN	1
610	0	2.27	16.54	14.57	5.906	sp|P61289|PSME3_HUMAN	Proteasome activator complex subunit 3 OS=Homo sapiens GN=PSME3 PE=1 SV=1	HUMAN	1
610	0	2.26	21.76	21.76	8.824	tr|A0A087WTV2|A0A087WTV2_HUMAN	Proteasome activator complex subunit 3 OS=Homo sapiens GN=PSME3 PE=1 SV=1	HUMAN	1
610	0	2.11	19.55	16.76	8.38	tr|K7ENH2|K7ENH2_HUMAN	Proteasome activator complex subunit 3 (Fragment) OS=Homo sapiens GN=PSME3 PE=1 SV=1	HUMAN	1
610	0	2	40	11.54	11.54	tr|B7Z8D3|B7Z8D3_HUMAN	Proteasome activator complex subunit 3 OS=Homo sapiens GN=PSME3 PE=1 SV=1	HUMAN	1
611	2.26	2.26	13.46	5.981	4.112	sp|O15460|P4HA2_HUMAN	Prolyl 4-hydroxylase subunit alpha-2 OS=Homo sapiens GN=P4HA2 PE=1 SV=1	HUMAN	1
612	2.25	2.25	30.39	30.39	19.61	tr|F5H6P7|F5H6P7_HUMAN	Protein mago nashi homolog 2 OS=Homo sapiens GN=MAGOHB PE=4 SV=1	HUMAN	1
612	0	2.25	20.95	20.95	13.51	sp|Q96A72|MGN2_HUMAN	Protein mago nashi homolog 2 OS=Homo sapiens GN=MAGOHB PE=1 SV=1	HUMAN	1
612	0	2.25	21.23	21.23	13.7	sp|P61326|MGN_HUMAN	Protein mago nashi homolog OS=Homo sapiens GN=MAGOH PE=1 SV=1	HUMAN	1
612	0	2	22.22	22.22	22.22	tr|F5H6N1|F5H6N1_HUMAN	Protein mago nashi homolog 2 OS=Homo sapiens GN=MAGOHB PE=1 SV=1	HUMAN	1
612	0	2	45.45	45.45	45.45	tr|F5H3U9|F5H3U9_HUMAN	Protein mago nashi homolog 2 OS=Homo sapiens GN=MAGOHB PE=4 SV=1	HUMAN	1
613	2.24	2.24	22.55	10.02	2.278	sp|Q53RD9|FBLN7_HUMAN	Fibulin-7 OS=Homo sapiens GN=FBLN7 PE=2 SV=1	HUMAN	1
613	0	2.16	35.9	11.36	3.663	tr|H7BZ65|H7BZ65_HUMAN	Fibulin-7 (Fragment) OS=Homo sapiens GN=FBLN7 PE=1 SV=1	HUMAN	1
613	0	1.83	16.12	6.284	2.732	tr|B8ZZC1|B8ZZC1_HUMAN	Fibulin-7 OS=Homo sapiens GN=FBLN7 PE=1 SV=1	HUMAN	1
614	2.23	2.23	19.38	12.78	3.084	sp|O43809|CPSF5_HUMAN	Cleavage and polyadenylation specificity factor subunit 5 OS=Homo sapiens GN=NUDT21 PE=1 SV=1	HUMAN	1
614	0	2.2	16.11	16.11	4.698	tr|H3BND3|H3BND3_HUMAN	Cleavage and polyadenylation-specificity factor subunit 5 (Fragment) OS=Homo sapiens GN=NUDT21 PE=1 SV=4	HUMAN	1
615	2.22	2.23	9.006	7.129	3.752	tr|F2Z2V0|F2Z2V0_HUMAN	Copine-1 (Fragment) OS=Homo sapiens GN=CPNE1 PE=1 SV=1	HUMAN	1
615	0	2.23	8.856	7.011	3.69	tr|B0QZ18|B0QZ18_HUMAN	Copine-1 OS=Homo sapiens GN=CPNE1 PE=1 SV=1	HUMAN	1
615	0	2.23	9.979	7.9	4.158	tr|A6PVH9|A6PVH9_HUMAN	Copine-1 OS=Homo sapiens GN=CPNE1 PE=1 SV=1	HUMAN	1
615	0	2.23	8.939	7.076	3.724	sp|Q99829|CPNE1_HUMAN	Copine-1 OS=Homo sapiens GN=CPNE1 PE=1 SV=1	HUMAN	1
616	2.22	2.22	11.81	11.81	5.208	sp|Q02878|RL6_HUMAN	60S ribosomal protein L6 OS=Homo sapiens GN=RPL6 PE=1 SV=3	HUMAN	1
616	0	2	9.375	9.375	9.375	tr|U3KQR5|U3KQR5_HUMAN	60S ribosomal protein L6 (Fragment) OS=Homo sapiens GN=RPL6 PE=1 SV=1	HUMAN	1
616	0	2	9.434	9.434	9.434	tr|F8VZ45|F8VZ45_HUMAN	60S ribosomal protein L6 (Fragment) OS=Homo sapiens GN=RPL6 PE=1 SV=1	HUMAN	1
616	0	2	23.81	23.81	23.81	tr|F8VR69|F8VR69_HUMAN	60S ribosomal protein L6 (Fragment) OS=Homo sapiens GN=RPL6 PE=1 SV=4	HUMAN	1
617	2.21	2.21	15.08	15.08	15.08	sp|P62318|SMD3_HUMAN	Small nuclear ribonucleoprotein Sm D3 OS=Homo sapiens GN=SNRPD3 PE=1 SV=1	HUMAN	3
618	2.19	4.45	37.53	14.96	11.02	sp|P12277|KCRB_HUMAN	Creatine kinase B-type OS=Homo sapiens GN=CKB PE=1 SV=1	HUMAN	3
618	0	1.27	27.93	9.497	9.497	tr|H0YJG0|H0YJG0_HUMAN	Creatine kinase B-type (Fragment) OS=Homo sapiens GN=CKB PE=1 SV=1	HUMAN	1
619	2.19	2.19	8.159	2.564	1.515	sp|Q92598|HS105_HUMAN	Heat shock protein 105 kDa OS=Homo sapiens GN=HSPH1 PE=1 SV=1	HUMAN	1
619	0	2.19	7.161	2.813	1.662	tr|A0A0A0MSM0|A0A0A0MSM0_HUMAN	Heat shock protein 105 kDa OS=Homo sapiens GN=HSPH1 PE=1 SV=1	HUMAN	1
620	2.19	2.19	30.71	22.83	12.6	tr|A6NJH9|A6NJH9_HUMAN	Eukaryotic translation initiation factor 1A, Y-chromosomal OS=Homo sapiens GN=EIF1AY PE=1 SV=1	HUMAN	1
620	0	2.19	27.08	20.14	11.11	sp|P47813|IF1AX_HUMAN	Eukaryotic translation initiation factor 1A, X-chromosomal OS=Homo sapiens GN=EIF1AX PE=1 SV=2	HUMAN	1
620	0	2.19	27.08	20.14	11.11	sp|O14602|IF1AY_HUMAN	Eukaryotic translation initiation factor 1A, Y-chromosomal OS=Homo sapiens GN=EIF1AY PE=1 SV=4	HUMAN	1
621	2.19	2.19	7.911	5.38	5.38	sp|P15121|ALDR_HUMAN	Aldose reductase OS=Homo sapiens GN=AKR1B1 PE=1 SV=3	HUMAN	2
622	2.19	2.19	10.71	10.71	7.143	sp|Q6P587|FAHD1_HUMAN	Acylpyruvase FAHD1, mitochondrial OS=Homo sapiens GN=FAHD1 PE=1 SV=2	HUMAN	1
623	2.18	2.18	10.07	7.374	2.338	sp|P07686|HEXB_HUMAN	Beta-hexosaminidase subunit beta OS=Homo sapiens GN=HEXB PE=1 SV=3	HUMAN	1
624	2.18	2.18	17.88	17.88	17.88	sp|P62263|RS14_HUMAN	40S ribosomal protein S14 OS=Homo sapiens GN=RPS14 PE=1 SV=3	HUMAN	2
625	2.17	3.31	9.476	1.87	1.185	sp|Q07092|COGA1_HUMAN	Collagen alpha-1(XVI) chain OS=Homo sapiens GN=COL16A1 PE=1 SV=2	HUMAN	2
625	0	2.21	8.489	2.381	1.242	tr|A6NCT7|A6NCT7_HUMAN	Collagen alpha-1(XVI) chain OS=Homo sapiens GN=COL16A1 PE=1 SV=1	HUMAN	1
626	2.17	2.17	19.93	6.081	6.081	sp|P31939|PUR9_HUMAN	Bifunctional purine biosynthesis protein PURH OS=Homo sapiens GN=ATIC PE=1 SV=3	HUMAN	2
626	0	1.7	23.53	14.71	14.71	tr|C9JLK0|C9JLK0_HUMAN	Bifunctional purine biosynthesis protein PURH (Fragment) OS=Homo sapiens GN=ATIC PE=1 SV=1	HUMAN	1
627	2.16	6.22	13.12	6.215	4.144	tr|G3XAP6|G3XAP6_HUMAN	Cartilage oligomeric matrix protein OS=Homo sapiens GN=COMP PE=1 SV=1	HUMAN	4
627	0	6.22	12.55	5.945	3.963	sp|P49747|COMP_HUMAN	Cartilage oligomeric matrix protein OS=Homo sapiens GN=COMP PE=1 SV=2	HUMAN	4
628	2.15	2.15	31.13	19.21	14.57	sp|P62277|RS13_HUMAN	40S ribosomal protein S13 OS=Homo sapiens GN=RPS13 PE=1 SV=2	HUMAN	2
628	0	2.1	27.03	14.86	14.86	tr|J3KMX5|J3KMX5_HUMAN	40S ribosomal protein S13 OS=Homo sapiens GN=RPS13 PE=1 SV=1	HUMAN	2
629	2.13	2.19	4.925	1.583	0.5277	sp|Q9UPM8|AP4E1_HUMAN	AP-4 complex subunit epsilon-1 OS=Homo sapiens GN=AP4E1 PE=1 SV=2	HUMAN	1
629	0.02	2.09	5.548	2.194	0.7742	RRRRRsp|Q8IZ52|CHSS2_HUMAN	REVERSED Chondroitin sulfate synthase 2 OS=Homo sapiens GN=CHPF PE=1 SV=2	HUMAN	1
629	0.01	2.05	7.52	2.236	1.22	RRRRRsp|Q2TAA5|ALG11_HUMAN	REVERSED GDP-Man:Man(3)GlcNAc(2)-PP-Dol alpha-1,2-mannosyltransferase OS=Homo sapiens GN=ALG11 PE=1 SV=2	HUMAN	1
629	0.01	2.04	5.415	0.6912	0.6912	sp|Q8WUM4|PDC6I_HUMAN	Programmed cell death 6-interacting protein OS=Homo sapiens GN=PDCD6IP PE=1 SV=1	HUMAN	1
629	0	2.03	4.891	1.63	1.63	tr|H0YL95|H0YL95_HUMAN	AP-4 complex subunit epsilon-1 OS=Homo sapiens GN=AP4E1 PE=1 SV=1	HUMAN	1
629	0	2.01	1.534	1.055	0.5753	sp|Q68E01|INT3_HUMAN	Integrator complex subunit 3 OS=Homo sapiens GN=INTS3 PE=1 SV=1	HUMAN	1
630	2.13	2.13	12.47	6.601	4.645	sp|P54727|RD23B_HUMAN	UV excision repair protein RAD23 homolog B OS=Homo sapiens GN=RAD23B PE=1 SV=1	HUMAN	1
631	2.13	2.13	8.178	5.14	5.14	sp|Q02742|GCNT1_HUMAN	Beta-1,3-galactosyl-O-glycosyl-glycoprotein beta-1,6-N-acetylglucosaminyltransferase OS=Homo sapiens GN=GCNT1 PE=1 SV=2	HUMAN	2
632	2.12	2.12	12.82	9.275	6.745	sp|O00499|BIN1_HUMAN	Myc box-dependent-interacting protein 1 OS=Homo sapiens GN=BIN1 PE=1 SV=1	HUMAN	2
633	2.11	2.12	4.994	1.419	0.7378	sp|Q8N6G6|ATL1_HUMAN	ADAMTS-like protein 1 OS=Homo sapiens GN=ADAMTSL1 PE=1 SV=4	HUMAN	1
634	2.11	2.11	12.81	6.875	6.875	tr|H0YJ34|H0YJ34_HUMAN	Fermitin family homolog 2 (Fragment) OS=Homo sapiens GN=FERMT2 PE=1 SV=1	HUMAN	3
634	0	2.11	11.18	6.471	6.471	sp|Q96AC1|FERM2_HUMAN	Fermitin family homolog 2 OS=Homo sapiens GN=FERMT2 PE=1 SV=1	HUMAN	3
635	2.11	2.11	11.01	8.491	4.403	sp|Q92820|GGH_HUMAN	Gamma-glutamyl hydrolase OS=Homo sapiens GN=GGH PE=1 SV=2	HUMAN	1
636	2.1	2.1	20.58	13.18	9.325	sp|Q641Q3|METRL_HUMAN	Meteorin-like protein OS=Homo sapiens GN=METRNL PE=2 SV=1	HUMAN	2
637	2.09	2.09	17.53	14.29	10.39	tr|H0YG83|H0YG83_HUMAN	Oligoribonuclease, mitochondrial (Fragment) OS=Homo sapiens GN=REXO2 PE=1 SV=1	HUMAN	1
637	0	2.09	18.92	14.41	14.41	tr|H0YH58|H0YH58_HUMAN	Oligoribonuclease, mitochondrial (Fragment) OS=Homo sapiens GN=REXO2 PE=1 SV=1	HUMAN	1
637	0	2.09	10.94	8.333	8.333	tr|H0YGR4|H0YGR4_HUMAN	Oligoribonuclease, mitochondrial (Fragment) OS=Homo sapiens GN=REXO2 PE=1 SV=1	HUMAN	1
637	0	2.09	10.66	8.122	8.122	tr|H0YG54|H0YG54_HUMAN	Oligoribonuclease, mitochondrial (Fragment) OS=Homo sapiens GN=REXO2 PE=1 SV=1	HUMAN	1
637	0	2.09	9.459	7.207	7.207	tr|F5GYG5|F5GYG5_HUMAN	Oligoribonuclease, mitochondrial OS=Homo sapiens GN=REXO2 PE=1 SV=1	HUMAN	1
637	0	2.09	14.29	10.88	10.88	tr|F5GX07|F5GX07_HUMAN	Oligoribonuclease, mitochondrial OS=Homo sapiens GN=REXO2 PE=1 SV=1	HUMAN	1
637	0	2.09	8.861	6.751	6.751	sp|Q9Y3B8|ORN_HUMAN	Oligoribonuclease, mitochondrial OS=Homo sapiens GN=REXO2 PE=1 SV=3	HUMAN	1
638	2.08	2.08	12.32	6.897	6.897	tr|C9J8H1|C9J8H1_HUMAN	V-type proton ATPase subunit E 1 (Fragment) OS=Homo sapiens GN=ATP6V1E1 PE=1 SV=1	HUMAN	1
638	0	2.08	13.27	6.195	6.195	sp|P36543|VATE1_HUMAN	V-type proton ATPase subunit E 1 OS=Homo sapiens GN=ATP6V1E1 PE=1 SV=1	HUMAN	1
639	2.07	2.07	10.96	1.826	1.182	tr|X5D2Q8|X5D2Q8_HUMAN	Neuropilin 2 isoform A (Fragment) OS=Homo sapiens GN=NRP2 PE=1 SV=1	HUMAN	1
639	0	2.07	11.02	1.836	1.188	tr|Q7LBX6|Q7LBX6_HUMAN	Neuropilin 2 OS=Homo sapiens GN=NRP2 PE=1 SV=1	HUMAN	1
639	0	2.07	11.32	1.887	1.221	tr|A0A024R412|A0A024R412_HUMAN	Neuropilin 2, isoform CRA_c OS=Homo sapiens GN=NRP2 PE=1 SV=1	HUMAN	1
639	0	2.07	11.22	1.87	1.21	tr|A0A024R3W6|A0A024R3W6_HUMAN	Neuropilin 2, isoform CRA_h OS=Homo sapiens GN=NRP2 PE=1 SV=1	HUMAN	1
639	0	2.07	10.96	1.826	1.182	sp|O60462|NRP2_HUMAN	Neuropilin-2 OS=Homo sapiens GN=NRP2 PE=1 SV=2	HUMAN	1
640	2.07	2.07	11.69	9.846	7.692	sp|Q96CX2|KCD12_HUMAN	BTB/POZ domain-containing protein KCTD12 OS=Homo sapiens GN=KCTD12 PE=1 SV=1	HUMAN	2
641	2.06	2.58	20.06	8.309	6.304	sp|Q6IBS0|TWF2_HUMAN	Twinfilin-2 OS=Homo sapiens GN=TWF2 PE=1 SV=2	HUMAN	2
641	0	2.58	22.44	11.42	8.661	tr|D6RG15|D6RG15_HUMAN	Twinfilin-2 OS=Homo sapiens GN=TWF2 PE=1 SV=1	HUMAN	2
641	0	2.51	9.444	1.855	1.855	tr|H0Y858|H0Y858_HUMAN	Uncharacterized protein (Fragment) OS=Homo sapiens PE=4 SV=1	HUMAN	2
642	2.06	2.06	11.5	4.803	2.329	sp|P21980|TGM2_HUMAN	Protein-glutamine gamma-glutamyltransferase 2 OS=Homo sapiens GN=TGM2 PE=1 SV=2	HUMAN	1
643	2.06	2.06	27.31	17.13	5.556	sp|P51148|RAB5C_HUMAN	Ras-related protein Rab-5C OS=Homo sapiens GN=RAB5C PE=1 SV=2	HUMAN	1
644	2.06	2.06	6.452	5.503	2.657	tr|C9JIZ6|C9JIZ6_HUMAN	Prosaposin OS=Homo sapiens GN=PSAP PE=1 SV=2	HUMAN	1
644	0	2.06	6.489	5.534	2.672	sp|P07602|SAP_HUMAN	Prosaposin OS=Homo sapiens GN=PSAP PE=1 SV=2	HUMAN	1
645	2.06	2.06	18.55	14.52	9.677	tr|E7EPB3|E7EPB3_HUMAN	60S ribosomal protein L14 OS=Homo sapiens GN=RPL14 PE=1 SV=1	HUMAN	1
645	0	2.06	10.7	8.372	5.581	sp|P50914|RL14_HUMAN	60S ribosomal protein L14 OS=Homo sapiens GN=RPL14 PE=1 SV=4	HUMAN	1
646	2.05	2.05	11.05	4.313	4.313	tr|H3BLW8|H3BLW8_HUMAN	Vascular endothelial growth factor A OS=Homo sapiens GN=VEGFA PE=1 SV=1	HUMAN	2
646	0	2.05	11.05	4.313	4.313	tr|A0A0A0MTB2|A0A0A0MTB2_HUMAN	Vascular endothelial growth factor A OS=Homo sapiens GN=VEGFA PE=1 SV=1	HUMAN	2
646	0	2.05	7.282	3.883	3.883	tr|J3KPA4|J3KPA4_HUMAN	Vascular endothelial growth factor A OS=Homo sapiens GN=VEGFA PE=1 SV=1	HUMAN	2
646	0	2.05	27.03	14.41	14.41	tr|H0YBI8|H0YBI8_HUMAN	Vascular endothelial growth factor A (Fragment) OS=Homo sapiens GN=VEGFA PE=1 SV=1	HUMAN	2
646	0	2.05	7.712	4.113	4.113	tr|A0A0A0MSI7|A0A0A0MSI7_HUMAN	Vascular endothelial growth factor A OS=Homo sapiens GN=VEGFA PE=1 SV=1	HUMAN	2
646	0	2.05	7.595	4.051	4.051	tr|A0A0A0MSH5|A0A0A0MSH5_HUMAN	Vascular endothelial growth factor A OS=Homo sapiens GN=VEGFA PE=1 SV=1	HUMAN	2
646	0	2.05	12.93	6.897	6.897	sp|P15692|VEGFA_HUMAN	Vascular endothelial growth factor A OS=Homo sapiens GN=VEGFA PE=1 SV=2	HUMAN	2
646	0	2.02	9.605	4.52	4.52	tr|A0A0A0MSH7|A0A0A0MSH7_HUMAN	Vascular endothelial growth factor A OS=Homo sapiens GN=VEGFA PE=1 SV=1	HUMAN	2
646	0	2.02	7.121	4.954	4.954	tr|H0YBZ0|H0YBZ0_HUMAN	Vascular endothelial growth factor A (Fragment) OS=Homo sapiens GN=VEGFA PE=1 SV=1	HUMAN	2
646	0	2.02	7.256	5.047	5.047	tr|A0A087X1L1|A0A087X1L1_HUMAN	Vascular endothelial growth factor A OS=Homo sapiens GN=VEGFA PE=1 SV=1	HUMAN	2
646	0	2.02	7.034	4.893	4.893	tr|A0A087WTP4|A0A087WTP4_HUMAN	Vascular endothelial growth factor A OS=Homo sapiens GN=VEGFA PE=1 SV=1	HUMAN	2
647	2.04	14.21	38.23	26.13	20.95	sp|Q05639|EF1A2_HUMAN	Elongation factor 1-alpha 2 OS=Homo sapiens GN=EEF1A2 PE=1 SV=1	HUMAN	10
648	2.04	2.68	7.389	2.511	1.65	sp|P42704|LPPRC_HUMAN	Leucine-rich PPR motif-containing protein, mitochondrial OS=Homo sapiens GN=LRPPRC PE=1 SV=3	HUMAN	2
648	0	2.58	8.929	4.563	4.563	tr|B8ZZ38|B8ZZ38_HUMAN	Leucine-rich PPR motif-containing protein, mitochondrial OS=Homo sapiens GN=LRPPRC PE=1 SV=1	HUMAN	2
648	0	2.58	11.14	6.407	6.407	tr|C9JCA9|C9JCA9_HUMAN	Leucine-rich PPR motif-containing protein, mitochondrial (Fragment) OS=Homo sapiens GN=LRPPRC PE=1 SV=1	HUMAN	2
649	2.04	2.04	41.85	13.59	7.609	sp|P62834|RAP1A_HUMAN	Ras-related protein Rap-1A OS=Homo sapiens GN=RAP1A PE=1 SV=1	HUMAN	1
649	0	2.04	41.85	13.59	7.609	sp|P61224|RAP1B_HUMAN	Ras-related protein Rap-1b OS=Homo sapiens GN=RAP1B PE=1 SV=1	HUMAN	1
649	0	2.03	35.87	7.609	7.609	sp|A6NIZ1|RP1BL_HUMAN	Ras-related protein Rap-1b-like protein OS=Homo sapiens PE=2 SV=1	HUMAN	1
649	0	2.02	49.51	13.59	13.59	tr|F5H823|F5H823_HUMAN	Ras-related protein Rap-1b (Fragment) OS=Homo sapiens GN=RAP1B PE=1 SV=1	HUMAN	1
649	0	2.02	42.15	11.57	11.57	tr|F5GZG1|F5GZG1_HUMAN	Ras-related protein Rap-1b (Fragment) OS=Homo sapiens GN=RAP1B PE=1 SV=4	HUMAN	1
649	0	2.02	43.22	11.86	11.86	tr|B7ZB78|B7ZB78_HUMAN	Ras-related protein Rap-1b OS=Homo sapiens GN=RAP1B PE=1 SV=1	HUMAN	1
650	2.04	2.04	4.789	2.851	2.052	tr|D6RHZ5|D6RHZ5_HUMAN	Protein transport protein Sec31A OS=Homo sapiens GN=SEC31A PE=1 SV=1	HUMAN	1
650	0	2.04	3.357	1.998	1.439	tr|D6REX3|D6REX3_HUMAN	Protein transport protein Sec31A OS=Homo sapiens GN=SEC31A PE=1 SV=1	HUMAN	1
650	0	2.04	3.443	2.049	1.475	sp|O94979|SC31A_HUMAN	Protein transport protein Sec31A OS=Homo sapiens GN=SEC31A PE=1 SV=3	HUMAN	1
650	0	2	2.993	1.858	1.858	tr|H7BXG7|H7BXG7_HUMAN	Protein transport protein Sec31A OS=Homo sapiens GN=SEC31A PE=1 SV=1	HUMAN	1
650	0	2	6.546	4.063	4.063	tr|H0YAB3|H0YAB3_HUMAN	Protein transport protein Sec31A (Fragment) OS=Homo sapiens GN=SEC31A PE=1 SV=1	HUMAN	1
650	0	2	9.705	7.595	7.595	tr|H0Y9K1|H0Y9K1_HUMAN	Protein transport protein Sec31A (Fragment) OS=Homo sapiens GN=SEC31A PE=1 SV=1	HUMAN	1
650	0	2	6.316	6.316	6.316	tr|H0Y8V7|H0Y8V7_HUMAN	Protein transport protein Sec31A (Fragment) OS=Homo sapiens GN=SEC31A PE=1 SV=4	HUMAN	1
651	2.04	2.04	16	6.526	4.842	sp|Q01518|CAP1_HUMAN	Adenylyl cyclase-associated protein 1 OS=Homo sapiens GN=CAP1 PE=1 SV=5	HUMAN	1
651	0	2.04	29.31	17.82	13.22	tr|Q5T0R7|Q5T0R7_HUMAN	Adenylyl cyclase-associated protein (Fragment) OS=Homo sapiens GN=CAP1 PE=1 SV=1	HUMAN	1
651	0	2.04	28.98	17.61	13.07	tr|Q5T0R6|Q5T0R6_HUMAN	Adenylyl cyclase-associated protein (Fragment) OS=Homo sapiens GN=CAP1 PE=1 SV=1	HUMAN	1
651	0	2.04	28.49	17.32	12.85	tr|Q5T0R5|Q5T0R5_HUMAN	Adenylyl cyclase-associated protein (Fragment) OS=Homo sapiens GN=CAP1 PE=1 SV=4	HUMAN	1
651	0	2.04	25.37	15.42	11.44	tr|Q5T0R4|Q5T0R4_HUMAN	Adenylyl cyclase-associated protein (Fragment) OS=Homo sapiens GN=CAP1 PE=1 SV=4	HUMAN	1
651	0	2.04	25.12	15.27	11.33	tr|Q5T0R3|Q5T0R3_HUMAN	Adenylyl cyclase-associated protein (Fragment) OS=Homo sapiens GN=CAP1 PE=1 SV=1	HUMAN	1
651	0	2.04	24.52	14.9	11.06	tr|Q5T0R2|Q5T0R2_HUMAN	Adenylyl cyclase-associated protein (Fragment) OS=Homo sapiens GN=CAP1 PE=1 SV=1	HUMAN	1
651	0	2.04	23.72	14.42	10.7	tr|Q5T0R1|Q5T0R1_HUMAN	Adenylyl cyclase-associated protein (Fragment) OS=Homo sapiens GN=CAP1 PE=1 SV=1	HUMAN	1
652	2.04	2.04	10.31	10.31	5.155	sp|P21781|FGF7_HUMAN	Fibroblast growth factor 7 OS=Homo sapiens GN=FGF7 PE=1 SV=1	HUMAN	1
652	0	1.96	8.197	8.197	8.197	tr|H0YNE7|H0YNE7_HUMAN	Fibroblast growth factor (Fragment) OS=Homo sapiens GN=FGF7 PE=1 SV=1	HUMAN	1
653	2.03	2.07	7.279	2.73	1.82	tr|H0Y8C6|H0Y8C6_HUMAN	Importin-5 (Fragment) OS=Homo sapiens GN=IPO5 PE=1 SV=1	HUMAN	1
653	0	2.07	7.293	2.735	1.823	sp|O00410|IPO5_HUMAN	Importin-5 OS=Homo sapiens GN=IPO5 PE=1 SV=4	HUMAN	1
654	2.03	2.04	9.259	6.173	6.173	tr|A0A096LP10|A0A096LP10_HUMAN	Putative bifunctional UDP-N-acetylglucosamine transferase and deubiquitinase ALG13 (Fragment) OS=Homo sapiens GN=ALG13 PE=1 SV=1	HUMAN	2
654	0	2.03	16.39	16.39	16.39	tr|A0A087WT15|A0A087WT15_HUMAN	Putative bifunctional UDP-N-acetylglucosamine transferase and deubiquitinase ALG13 OS=Homo sapiens GN=ALG13 PE=1 SV=1	HUMAN	2
655	2.03	2.03	12.21	7.634	7.634	sp|Q99536|VAT1_HUMAN	Synaptic vesicle membrane protein VAT-1 homolog OS=Homo sapiens GN=VAT1 PE=1 SV=2	HUMAN	2
655	0	2	16.3	16.3	16.3	tr|K7ER81|K7ER81_HUMAN	Synaptic vesicle membrane protein VAT-1 homolog (Fragment) OS=Homo sapiens GN=VAT1 PE=1 SV=1	HUMAN	1
655	0	2	9.934	9.934	9.934	tr|K7ENX2|K7ENX2_HUMAN	Synaptic vesicle membrane protein VAT-1 homolog (Fragment) OS=Homo sapiens GN=VAT1 PE=1 SV=1	HUMAN	1
655	0	2	9.74	9.74	9.74	tr|K7EM19|K7EM19_HUMAN	Synaptic vesicle membrane protein VAT-1 homolog (Fragment) OS=Homo sapiens GN=VAT1 PE=1 SV=1	HUMAN	1
656	2.02	4.13	18.34	8.453	6.447	sp|P02787|TRFE_HUMAN	Serotransferrin OS=Homo sapiens GN=TF PE=1 SV=3	HUMAN	3
656	0	4.09	30.07	20.98	16.08	tr|H7C5E8|H7C5E8_HUMAN	Serotransferrin (Fragment) OS=Homo sapiens GN=TF PE=1 SV=1	HUMAN	2
657	2.02	2.2	10.9	2.285	0.9346	sp|P33176|KINH_HUMAN	Kinesin-1 heavy chain OS=Homo sapiens GN=KIF5B PE=1 SV=1	HUMAN	1
658	2.02	2.02	36.97	7.143	7.143	sp|Q16629|SRSF7_HUMAN	Serine/arginine-rich splicing factor 7 OS=Homo sapiens GN=SRSF7 PE=1 SV=1	HUMAN	1
658	0	2.02	25.96	7.234	7.234	tr|C9JAB2|C9JAB2_HUMAN	Serine/arginine-rich-splicing factor 7 OS=Homo sapiens GN=SRSF7 PE=1 SV=1	HUMAN	1
658	0	2.01	32.85	12.41	12.41	tr|A0A0B4J1Z1|A0A0B4J1Z1_HUMAN	Serine/arginine-rich-splicing factor 7 OS=Homo sapiens GN=SRSF7 PE=4 SV=1	HUMAN	1
659	2.02	2.02	10.02	3.403	3.403	tr|G8JLG2|G8JLG2_HUMAN	Corneodesmosin OS=Homo sapiens GN=CDSN PE=1 SV=1	HUMAN	1
659	0	2.02	10.02	3.403	3.403	sp|Q15517|CDSN_HUMAN	Corneodesmosin OS=Homo sapiens GN=CDSN PE=1 SV=3	HUMAN	1
660	2.02	2.02	3.831	0.9823	0.9823	sp|Q12860|CNTN1_HUMAN	Contactin-1 OS=Homo sapiens GN=CNTN1 PE=1 SV=1	HUMAN	1
661	2.02	2.02	3.491	2.259	2.259	sp|Q9UNW1|MINP1_HUMAN	Multiple inositol polyphosphate phosphatase 1 OS=Homo sapiens GN=MINPP1 PE=1 SV=1	HUMAN	1
662	2.02	2.02	19.3	19.3	14.04	sp|P05386|RLA1_HUMAN	60S acidic ribosomal protein P1 OS=Homo sapiens GN=RPLP1 PE=1 SV=1	HUMAN	1
663	2.01	2.22	4.454	0.4437	0.3194	sp|Q96RW7|HMCN1_HUMAN	Hemicentin-1 OS=Homo sapiens GN=HMCN1 PE=1 SV=2	HUMAN	3
664	2.01	2.01	18.36	2.972	2.972	tr|A0A0A6YYI4|A0A0A6YYI4_HUMAN	Eukaryotic translation initiation factor 4B OS=Homo sapiens GN=EIF4B PE=1 SV=1	HUMAN	1
664	0	2.01	15.91	2.76	2.76	tr|E7EX17|E7EX17_HUMAN	Eukaryotic translation initiation factor 4B OS=Homo sapiens GN=EIF4B PE=1 SV=1	HUMAN	1
664	0	2.01	16.04	2.782	2.782	sp|P23588|IF4B_HUMAN	Eukaryotic translation initiation factor 4B OS=Homo sapiens GN=EIF4B PE=1 SV=2	HUMAN	1
664	0	2.01	23.89	4.722	4.722	tr|F8VX11|F8VX11_HUMAN	Eukaryotic translation initiation factor 4B (Fragment) OS=Homo sapiens GN=EIF4B PE=1 SV=1	HUMAN	1
665	2.01	2.01	12.14	1.156	1.156	sp|Q9H1B5|XYLT2_HUMAN	Xylosyltransferase 2 OS=Homo sapiens GN=XYLT2 PE=2 SV=2	HUMAN	1
666	2.01	2.01	20.58	4.204	4.204	sp|P49411|EFTU_HUMAN	Elongation factor Tu, mitochondrial OS=Homo sapiens GN=TUFM PE=1 SV=2	HUMAN	1
667	2.01	2.01	8.006	2.247	2.247	tr|A0AVL1|A0AVL1_HUMAN	ADAM9 protein OS=Homo sapiens GN=ADAM9 PE=1 SV=1	HUMAN	1
667	0	2.01	6.96	1.954	1.954	sp|Q13443|ADAM9_HUMAN	Disintegrin and metalloproteinase domain-containing protein 9 OS=Homo sapiens GN=ADAM9 PE=1 SV=1	HUMAN	1
667	0	2.01	7.166	2.548	2.548	tr|F8WC54|F8WC54_HUMAN	Disintegrin and metalloproteinase domain-containing protein 9 OS=Homo sapiens GN=ADAM9 PE=1 SV=1	HUMAN	1
667	0	2.01	36.73	10.88	10.88	tr|C9JPM3|C9JPM3_HUMAN	Disintegrin and metalloproteinase domain-containing protein 9 OS=Homo sapiens GN=ADAM9 PE=1 SV=1	HUMAN	1
667	0	2.01	20.31	12.5	12.5	tr|C9J6H5|C9J6H5_HUMAN	Disintegrin and metalloproteinase domain-containing protein 9 OS=Homo sapiens GN=ADAM9 PE=1 SV=1	HUMAN	1
668	2.01	2.01	11.83	3.856	3.856	sp|Q15008|PSMD6_HUMAN	26S proteasome non-ATPase regulatory subunit 6 OS=Homo sapiens GN=PSMD6 PE=1 SV=1	HUMAN	1
668	0	2	14.49	10.87	10.87	tr|H7C531|H7C531_HUMAN	26S proteasome non-ATPase regulatory subunit 6 (Fragment) OS=Homo sapiens GN=PSMD6 PE=1 SV=1	HUMAN	1
669	2.01	2.01	6.431	1.286	1.286	sp|Q8NBJ5|GT251_HUMAN	Procollagen galactosyltransferase 1 OS=Homo sapiens GN=COLGALT1 PE=1 SV=1	HUMAN	1
670	2.01	2.01	19.6	15.2	15.2	sp|P17931|LEG3_HUMAN	Galectin-3 OS=Homo sapiens GN=LGALS3 PE=1 SV=5	HUMAN	3
671	2.01	2.01	16.27	6.509	6.509	sp|O95433|AHSA1_HUMAN	Activator of 90 kDa heat shock protein ATPase homolog 1 OS=Homo sapiens GN=AHSA1 PE=1 SV=1	HUMAN	1
671	0	2.01	19.21	10.84	10.84	tr|G3V438|G3V438_HUMAN	Activator of 90 kDa heat shock protein ATPase homolog 1 (Fragment) OS=Homo sapiens GN=AHSA1 PE=1 SV=1	HUMAN	1
671	0	2	10.19	10.19	10.19	tr|H0YJG7|H0YJG7_HUMAN	Activator of 90 kDa heat shock protein ATPase homolog 1 (Fragment) OS=Homo sapiens GN=AHSA1 PE=1 SV=1	HUMAN	1
671	0	2	24.44	24.44	24.44	tr|H0YJ63|H0YJ63_HUMAN	Activator of 90 kDa heat shock protein ATPase homolog 1 (Fragment) OS=Homo sapiens GN=AHSA1 PE=1 SV=1	HUMAN	1
672	2.01	2.01	11.38	7.241	7.241	sp|P30084|ECHM_HUMAN	Enoyl-CoA hydratase, mitochondrial OS=Homo sapiens GN=ECHS1 PE=1 SV=4	HUMAN	1
673	2.01	2.01	5.34	3.398	3.398	tr|J3KNQ4|J3KNQ4_HUMAN	Alpha-parvin OS=Homo sapiens GN=PARVA PE=1 SV=1	HUMAN	1
673	0	2.01	10.53	6.699	6.699	tr|E9PS97|E9PS97_HUMAN	Alpha-parvin (Fragment) OS=Homo sapiens GN=PARVA PE=1 SV=1	HUMAN	1
673	0	2.01	5.914	3.763	3.763	sp|Q9NVD7|PARVA_HUMAN	Alpha-parvin OS=Homo sapiens GN=PARVA PE=1 SV=1	HUMAN	1
674	2	34.38	46.95	34.6	31.07	sp|O00469|PLOD2_HUMAN	Procollagen-lysine,2-oxoglutarate 5-dioxygenase 2 OS=Homo sapiens GN=PLOD2 PE=1 SV=2	HUMAN	19
674	0	3.96	22.45	22.45	22.45	tr|F8WEW3|F8WEW3_HUMAN	Procollagen-lysine,2-oxoglutarate 5-dioxygenase 2 OS=Homo sapiens GN=PLOD2 PE=1 SV=1	HUMAN	2
675	2	25.67	19.69	11.73	8.992	sp|P12883|MYH7_HUMAN	Myosin-7 OS=Homo sapiens GN=MYH7 PE=1 SV=5	HUMAN	15
675	0	19.36	14.08	8.303	6.292	sp|P13533|MYH6_HUMAN	Myosin-6 OS=Homo sapiens GN=MYH6 PE=1 SV=5	HUMAN	12
676	2	24.96	41.02	41.02	37.47	sp|Q71U36|TBA1A_HUMAN	Tubulin alpha-1A chain OS=Homo sapiens GN=TUBA1A PE=1 SV=1	HUMAN	16
676	0	20.97	39.33	39.33	32.22	sp|Q13748|TBA3C_HUMAN	Tubulin alpha-3C/D chain OS=Homo sapiens GN=TUBA3C PE=1 SV=3	HUMAN	14
676	0	15.95	34.67	34.67	27.78	sp|Q6PEY2|TBA3E_HUMAN	Tubulin alpha-3E chain OS=Homo sapiens GN=TUBA3E PE=1 SV=2	HUMAN	10
676	0	14.14	46.12	46.12	42.47	tr|F8VQQ4|F8VQQ4_HUMAN	Tubulin alpha-1A chain (Fragment) OS=Homo sapiens GN=TUBA1A PE=1 SV=1	HUMAN	11
677	2	2.58	8.621	8.621	8.621	tr|A6NFX8|A6NFX8_HUMAN	ADP-sugar pyrophosphatase OS=Homo sapiens GN=NUDT5 PE=1 SV=1	HUMAN	2
677	0	2	6.849	6.849	6.849	sp|Q9UKK9|NUDT5_HUMAN	ADP-sugar pyrophosphatase OS=Homo sapiens GN=NUDT5 PE=1 SV=1	HUMAN	1
678	2	2.04	6.057	1.382	1.382	sp|Q9NZ08|ERAP1_HUMAN	Endoplasmic reticulum aminopeptidase 1 OS=Homo sapiens GN=ERAP1 PE=1 SV=3	HUMAN	1
678	0	2.02	12.5	9.028	9.028	tr|H0Y9X5|H0Y9X5_HUMAN	Endoplasmic reticulum aminopeptidase 1 (Fragment) OS=Homo sapiens GN=ERAP1 PE=1 SV=1	HUMAN	1
679	2	2.01	6.061	6.061	3.896	sp|Q15102|PA1B3_HUMAN	Platelet-activating factor acetylhydrolase IB subunit gamma OS=Homo sapiens GN=PAFAH1B3 PE=1 SV=1	HUMAN	1
679	0	2	5.488	5.488	5.488	tr|M0R389|M0R389_HUMAN	Platelet-activating factor acetylhydrolase IB subunit gamma (Fragment) OS=Homo sapiens GN=PAFAH1B3 PE=1 SV=4	HUMAN	1
680	2	2.01	3.427	2.419	2.419	sp|P42785|PCP_HUMAN	Lysosomal Pro-X carboxypeptidase OS=Homo sapiens GN=PRCP PE=1 SV=1	HUMAN	1
681	2	2	10.91	1.068	1.068	sp|P10643|CO7_HUMAN	Complement component C7 OS=Homo sapiens GN=C7 PE=1 SV=2	HUMAN	1
682	2	2	11.54	2.564	2.564	tr|D6REA1|D6REA1_HUMAN	Nucleotide exchange factor SIL1 OS=Homo sapiens GN=SIL1 PE=1 SV=1	HUMAN	1
682	0	2	11.71	2.603	2.603	sp|Q9H173|SIL1_HUMAN	Nucleotide exchange factor SIL1 OS=Homo sapiens GN=SIL1 PE=1 SV=1	HUMAN	1
683	2	2	7.121	1.238	1.238	sp|P43121|MUC18_HUMAN	Cell surface glycoprotein MUC18 OS=Homo sapiens GN=MCAM PE=1 SV=2	HUMAN	1
684	2	2	19.44	4.389	4.389	tr|G3V150|G3V150_HUMAN	Beta-1,3-glucuronyltransferase 3 (Glucuronosyltransferase I), isoform CRA_a OS=Homo sapiens GN=B3GAT3 PE=1 SV=1	HUMAN	1
684	0	2	18.51	4.179	4.179	sp|O94766|B3GA3_HUMAN	Galactosylgalactosylxylosylprotein 3-beta-glucuronosyltransferase 3 OS=Homo sapiens GN=B3GAT3 PE=1 SV=2	HUMAN	1
685	2	2	8.333	1.577	1.577	sp|Q9BY11|PACN1_HUMAN	Protein kinase C and casein kinase substrate in neurons protein 1 OS=Homo sapiens GN=PACSIN1 PE=1 SV=1	HUMAN	1
685	0	2	3.483	1.741	1.741	tr|F6U236|F6U236_HUMAN	Protein kinase C and casein kinase substrate in neurons protein 1 OS=Homo sapiens GN=PACSIN1 PE=1 SV=1	HUMAN	1
686	2	2	5.975	1.054	1.054	sp|Q9BXR6|FHR5_HUMAN	Complement factor H-related protein 5 OS=Homo sapiens GN=CFHR5 PE=1 SV=1	HUMAN	1
686	0	2	4.153	1.917	1.917	sp|Q9UNQ2|DIM1_HUMAN	Probable dimethyladenosine transferase OS=Homo sapiens GN=DIMT1 PE=1 SV=1	HUMAN	1
686	0	2	3.896	3.896	3.896	tr|D6RCL3|D6RCL3_HUMAN	Probable dimethyladenosine transferase OS=Homo sapiens GN=DIMT1 PE=1 SV=1	HUMAN	1
687	2	2	21.07	7.438	7.438	tr|J3QSB7|J3QSB7_HUMAN	Purine nucleoside phosphorylase OS=Homo sapiens GN=MTAP PE=1 SV=1	HUMAN	1
687	0	2	17	6	6	tr|B4DUC8|B4DUC8_HUMAN	S-methyl-5'-thioadenosine phosphorylase OS=Homo sapiens GN=MTAP PE=1 SV=1	HUMAN	1
687	0	2	18.02	6.36	6.36	sp|Q13126|MTAP_HUMAN	S-methyl-5'-thioadenosine phosphorylase OS=Homo sapiens GN=MTAP PE=1 SV=2	HUMAN	1
687	0	2	36	36	36	tr|F8WES2|F8WES2_HUMAN	S-methyl-5'-thioadenosine phosphorylase OS=Homo sapiens GN=MTAP PE=4 SV=1	HUMAN	1
687	0	2	12.59	12.59	12.59	tr|F2Z2F3|F2Z2F3_HUMAN	Uncharacterized protein OS=Homo sapiens PE=4 SV=1	HUMAN	1
688	2	2	11.53	9.153	9.153	sp|Q6UWP8|SBSN_HUMAN	Suprabasin OS=Homo sapiens GN=SBSN PE=1 SV=2	HUMAN	1
689	2	2	9.195	7.28	7.28	sp|P35270|SPRE_HUMAN	Sepiapterin reductase OS=Homo sapiens GN=SPR PE=1 SV=1	HUMAN	1
690	2	2	18.18	9.545	9.545	sp|O75629|CREG1_HUMAN	Protein CREG1 OS=Homo sapiens GN=CREG1 PE=1 SV=1	HUMAN	1
691	2	2	17.18	9.202	9.202	tr|M0R192|M0R192_HUMAN	Flavin reductase (NADPH) OS=Homo sapiens GN=BLVRB PE=1 SV=1	HUMAN	1
691	0	2	18.18	9.74	9.74	tr|M0QZL1|M0QZL1_HUMAN	Flavin reductase (NADPH) OS=Homo sapiens GN=BLVRB PE=1 SV=1	HUMAN	1
691	0	2	13.59	7.282	7.282	sp|P30043|BLVRB_HUMAN	Flavin reductase (NADPH) OS=Homo sapiens GN=BLVRB PE=1 SV=3	HUMAN	1
692	2	2	21.79	4.487	4.487	tr|K7EPE4|K7EPE4_HUMAN	SEC14-like protein 1 (Fragment) OS=Homo sapiens GN=SEC14L1 PE=1 SV=1	HUMAN	1
693	2	2	21.53	6.944	6.944	tr|J3QRJ3|J3QRJ3_HUMAN	Thy-1 membrane glycoprotein OS=Homo sapiens GN=THY1 PE=1 SV=1	HUMAN	1
693	0	2	18.79	6.061	6.061	tr|E9PNQ8|E9PNQ8_HUMAN	Thy-1 membrane glycoprotein (Fragment) OS=Homo sapiens GN=THY1 PE=1 SV=1	HUMAN	1
693	0	2	20.39	6.579	6.579	tr|E9PIM6|E9PIM6_HUMAN	Thy-1 membrane glycoprotein (Fragment) OS=Homo sapiens GN=THY1 PE=1 SV=4	HUMAN	1
693	0	2	19.25	6.211	6.211	sp|P04216|THY1_HUMAN	Thy-1 membrane glycoprotein OS=Homo sapiens GN=THY1 PE=1 SV=2	HUMAN	1
694	2	2	22.5	13.12	13.12	tr|E9PHK0|E9PHK0_HUMAN	Tetranectin OS=Homo sapiens GN=CLEC3B PE=1 SV=1	HUMAN	1
694	0	2	17.82	10.4	10.4	sp|P05452|TETN_HUMAN	Tetranectin OS=Homo sapiens GN=CLEC3B PE=1 SV=3	HUMAN	1
695	2	2	2.923	1.506	1.506	sp|Q92900|RENT1_HUMAN	Regulator of nonsense transcripts 1 OS=Homo sapiens GN=UPF1 PE=1 SV=2	HUMAN	1
696	2	2	4.975	3.731	3.731	sp|Q6UX72|B3GN9_HUMAN	UDP-GlcNAc:betaGal beta-1,3-N-acetylglucosaminyltransferase 9 OS=Homo sapiens GN=B3GNT9 PE=2 SV=1	HUMAN	1
697	2	2	1.711	1.046	1.046	sp|Q14703|MBTP1_HUMAN	Membrane-bound transcription factor site-1 protease OS=Homo sapiens GN=MBTPS1 PE=1 SV=1	HUMAN	1
698	2	2	3.941	3.941	3.941	tr|K7EQ55|K7EQ55_HUMAN	DAZ-associated protein 1 OS=Homo sapiens GN=DAZAP1 PE=1 SV=2	HUMAN	1
698	0	2	4.893	4.893	4.893	tr|K7EQ02|K7EQ02_HUMAN	DAZ-associated protein 1 (Fragment) OS=Homo sapiens GN=DAZAP1 PE=1 SV=2	HUMAN	1
698	0	2	3.941	3.941	3.941	tr|K7EK33|K7EK33_HUMAN	DAZ-associated protein 1 OS=Homo sapiens GN=DAZAP1 PE=1 SV=2	HUMAN	1
698	0	2	3.931	3.931	3.931	sp|Q96EP5|DAZP1_HUMAN	DAZ-associated protein 1 OS=Homo sapiens GN=DAZAP1 PE=1 SV=1	HUMAN	1
699	2	2	3.43	3.43	3.43	tr|A0A087WVM3|A0A087WVM3_HUMAN	Protein CYR61 OS=Homo sapiens GN=CYR61 PE=1 SV=1	HUMAN	1
699	0	2	3.412	3.412	3.412	sp|O00622|CYR61_HUMAN	Protein CYR61 OS=Homo sapiens GN=CYR61 PE=1 SV=1	HUMAN	1
700	2	2	10.88	10.88	10.88	sp|Q9Y2V2|CHSP1_HUMAN	Calcium-regulated heat stable protein 1 OS=Homo sapiens GN=CARHSP1 PE=1 SV=2	HUMAN	1
701	2	2	4.472	4.472	4.472	sp|Q9BZM5|N2DL2_HUMAN	NKG2D ligand 2 OS=Homo sapiens GN=ULBP2 PE=1 SV=1	HUMAN	1
702	2	2	5.607	5.607	5.607	sp|Q92882|OSTF1_HUMAN	Osteoclast-stimulating factor 1 OS=Homo sapiens GN=OSTF1 PE=1 SV=2	HUMAN	1
703	1.99	1.99	6.077	6.077	2.486	tr|F6SDV2|F6SDV2_HUMAN	Tubulointerstitial nephritis antigen-like OS=Homo sapiens GN=TINAGL1 PE=1 SV=1	HUMAN	1
703	0	1.99	4.711	4.711	1.927	sp|Q9GZM7|TINAL_HUMAN	Tubulointerstitial nephritis antigen-like OS=Homo sapiens GN=TINAGL1 PE=1 SV=1	HUMAN	1
704	1.98	2.16	15.38	4.858	1.822	sp|O60701|UGDH_HUMAN	UDP-glucose 6-dehydrogenase OS=Homo sapiens GN=UGDH PE=1 SV=1	HUMAN	1
705	1.97	1.98	8.414	0.5957	0.5957	sp|Q2M1P5|KIF7_HUMAN	Kinesin-like protein KIF7 OS=Homo sapiens GN=KIF7 PE=1 SV=2	HUMAN	1
706	1.97	1.98	12.42	3.106	3.106	sp|Q00577|PURA_HUMAN	Transcriptional activator protein Pur-alpha OS=Homo sapiens GN=PURA PE=1 SV=2	HUMAN	1
707	1.96	63.31	69.82	65.91	59.96	tr|Q3BDU5|Q3BDU5_HUMAN	Prelamin-A/C OS=Homo sapiens GN=LMNA PE=1 SV=1	HUMAN	36
707	0	55.68	64.15	58.86	57.84	tr|Q5TCI8|Q5TCI8_HUMAN	Prelamin-A/C OS=Homo sapiens GN=LMNA PE=1 SV=1	HUMAN	33
708	1.96	2.05	4.678	1.457	0.6902	sp|O75533|SF3B1_HUMAN	Splicing factor 3B subunit 1 OS=Homo sapiens GN=SF3B1 PE=1 SV=3	HUMAN	1
709	1.96	1.96	24.11	3.869	3.869	tr|A0A0A0MS88|A0A0A0MS88_HUMAN	Collagen and calcium-binding EGF domain-containing protein 1 OS=Homo sapiens GN=CCBE1 PE=4 SV=1	HUMAN	1
709	0	1.96	19.95	3.202	3.202	sp|Q6UXH8|CCBE1_HUMAN	Collagen and calcium-binding EGF domain-containing protein 1 OS=Homo sapiens GN=CCBE1 PE=1 SV=1	HUMAN	1
709	0	1.96	28.26	28.26	28.26	tr|K7EQ81|K7EQ81_HUMAN	Collagen and calcium-binding EGF domain-containing protein 1 (Fragment) OS=Homo sapiens GN=CCBE1 PE=4 SV=1	HUMAN	1
710	1.96	1.96	11.4	7.721	7.721	tr|F2Z2Y4|F2Z2Y4_HUMAN	Pyridoxal kinase OS=Homo sapiens GN=PDXK PE=1 SV=1	HUMAN	1
710	0	1.96	9.936	6.731	6.731	sp|O00764|PDXK_HUMAN	Pyridoxal kinase OS=Homo sapiens GN=PDXK PE=1 SV=1	HUMAN	1
711	1.95	1.95	34.47	13.62	10.21	tr|E9PQD7|E9PQD7_HUMAN	40S ribosomal protein S2 OS=Homo sapiens GN=RPS2 PE=1 SV=1	HUMAN	2
711	0	1.95	27.65	10.92	8.191	sp|P15880|RS2_HUMAN	40S ribosomal protein S2 OS=Homo sapiens GN=RPS2 PE=1 SV=2	HUMAN	2
711	0	1.95	35.9	16.41	12.31	tr|H0YEN5|H0YEN5_HUMAN	40S ribosomal protein S2 (Fragment) OS=Homo sapiens GN=RPS2 PE=1 SV=1	HUMAN	2
711	0	1.9	16.06	11.01	11.01	tr|E9PMM9|E9PMM9_HUMAN	40S ribosomal protein S2 (Fragment) OS=Homo sapiens GN=RPS2 PE=1 SV=1	HUMAN	2
711	0	1.39	42.86	20.63	20.63	tr|H0YE27|H0YE27_HUMAN	40S ribosomal protein S2 (Fragment) OS=Homo sapiens GN=RPS2 PE=1 SV=1	HUMAN	1
711	0	1.39	12.18	6.599	6.599	tr|E9PPT0|E9PPT0_HUMAN	40S ribosomal protein S2 OS=Homo sapiens GN=RPS2 PE=1 SV=1	HUMAN	1
711	0	1.39	29.55	29.55	29.55	tr|H3BNG3|H3BNG3_HUMAN	40S ribosomal protein S2 (Fragment) OS=Homo sapiens GN=RPS2 PE=1 SV=1	HUMAN	1
712	1.94	1.94	4.235	3.415	3.415	sp|P13010|XRCC5_HUMAN	X-ray repair cross-complementing protein 5 OS=Homo sapiens GN=XRCC5 PE=1 SV=3	HUMAN	3
713	1.83	1.83	12.57	6.425	4.19	tr|C9JP16|C9JP16_HUMAN	Cartilage-associated protein OS=Homo sapiens GN=CRTAP PE=1 SV=1	HUMAN	1
713	0	1.83	11.22	5.736	3.741	sp|O75718|CRTAP_HUMAN	Cartilage-associated protein OS=Homo sapiens GN=CRTAP PE=1 SV=1	HUMAN	1
714	1.83	1.83	20.59	12.5	12.5	sp|P61353|RL27_HUMAN	60S ribosomal protein L27 OS=Homo sapiens GN=RPL27 PE=1 SV=2	HUMAN	2
715	1.83	1.83	3.978	3.978	3.978	sp|Q6P4A8|PLBL1_HUMAN	Phospholipase B-like 1 OS=Homo sapiens GN=PLBD1 PE=1 SV=2	HUMAN	2
715	0	1.44	6.944	6.944	6.944	tr|F5H053|F5H053_HUMAN	Phospholipase B-like 1 (Fragment) OS=Homo sapiens GN=PLBD1 PE=1 SV=1	HUMAN	1
716	1.8	1.88	38.3	22.34	12.23	sp|O75223|GGCT_HUMAN	Gamma-glutamylcyclotransferase OS=Homo sapiens GN=GGCT PE=1 SV=1	HUMAN	2
716	0	1.68	51.46	22.33	22.33	tr|M0QZK8|M0QZK8_HUMAN	Gamma-glutamylcyclotransferase OS=Homo sapiens GN=GGCT PE=1 SV=1	HUMAN	2
716	0	1.43	19.28	19.28	7.831	tr|B8ZZK2|B8ZZK2_HUMAN	Gamma-glutamylcyclotransferase OS=Homo sapiens GN=GGCT PE=1 SV=1	HUMAN	1
717	1.79	1.8	9.687	7.813	7.813	sp|O75821|EIF3G_HUMAN	Eukaryotic translation initiation factor 3 subunit G OS=Homo sapiens GN=EIF3G PE=1 SV=2	HUMAN	2
717	0	1.79	8.651	8.651	8.651	tr|K7ENA8|K7ENA8_HUMAN	Eukaryotic translation initiation factor 3 subunit G (Fragment) OS=Homo sapiens GN=EIF3G PE=1 SV=1	HUMAN	2
718	1.79	1.79	16.85	10.62	10.62	sp|Q86UD1|OAF_HUMAN	Out at first protein homolog OS=Homo sapiens GN=OAF PE=2 SV=1	HUMAN	3
718	0	1.4	23.57	12.74	12.74	tr|E9PJ29|E9PJ29_HUMAN	Out at first protein homolog OS=Homo sapiens GN=OAF PE=1 SV=1	HUMAN	2
719	1.79	1.79	18.3	13.73	13.73	sp|Q5JXB2|UE2NL_HUMAN	Putative ubiquitin-conjugating enzyme E2 N-like OS=Homo sapiens GN=UBE2NL PE=1 SV=1	HUMAN	2
719	0	1.79	18.42	13.82	13.82	sp|P61088|UBE2N_HUMAN	Ubiquitin-conjugating enzyme E2 N OS=Homo sapiens GN=UBE2N PE=1 SV=1	HUMAN	2
719	0	1.42	12.36	12.36	12.36	tr|F8VQQ8|F8VQQ8_HUMAN	Ubiquitin-conjugating enzyme E2 N OS=Homo sapiens GN=UBE2N PE=1 SV=1	HUMAN	1
720	1.77	1.84	19.79	13.43	6.36	sp|P21796|VDAC1_HUMAN	Voltage-dependent anion-selective channel protein 1 OS=Homo sapiens GN=VDAC1 PE=1 SV=2	HUMAN	2
721	1.77	1.77	20.21	7.979	7.979	tr|Q5JR95|Q5JR95_HUMAN	40S ribosomal protein S8 OS=Homo sapiens GN=RPS8 PE=1 SV=1	HUMAN	1
721	0	1.77	13.46	7.212	7.212	sp|P62241|RS8_HUMAN	40S ribosomal protein S8 OS=Homo sapiens GN=RPS8 PE=1 SV=2	HUMAN	1
722	1.76	1.76	29.55	29.55	6.818	tr|K7EK07|K7EK07_HUMAN	Histone H3 (Fragment) OS=Homo sapiens GN=H3F3B PE=1 SV=1	HUMAN	1
722	0	1.76	28.68	28.68	6.618	sp|Q71DI3|H32_HUMAN	Histone H3.2 OS=Homo sapiens GN=HIST2H3A PE=1 SV=3	HUMAN	1
722	0	1.76	28.68	28.68	6.618	sp|Q16695|H31T_HUMAN	Histone H3.1t OS=Homo sapiens GN=HIST3H3 PE=1 SV=3	HUMAN	1
722	0	1.76	28.68	28.68	6.618	sp|P84243|H33_HUMAN	Histone H3.3 OS=Homo sapiens GN=H3F3A PE=1 SV=2	HUMAN	1
722	0	1.76	28.68	28.68	6.618	sp|P68431|H31_HUMAN	Histone H3.1 OS=Homo sapiens GN=HIST1H3A PE=1 SV=2	HUMAN	1
722	0	1.71	29.63	20.74	6.667	sp|Q6NXT2|H3C_HUMAN	Histone H3.3C OS=Homo sapiens GN=H3F3C PE=1 SV=3	HUMAN	1
722	0	1.64	24.26	16.18	6.618	tr|Q5TEC6|Q5TEC6_HUMAN	Histone H3 OS=Homo sapiens GN=HIST2H3PS2 PE=1 SV=1	HUMAN	1
722	0	1.44	17.88	17.88	5.96	tr|K7ES00|K7ES00_HUMAN	Histone H3.3 (Fragment) OS=Homo sapiens GN=H3F3B PE=1 SV=1	HUMAN	1
722	0	1.44	29.35	29.35	9.783	tr|K7EMV3|K7EMV3_HUMAN	Histone H3 OS=Homo sapiens GN=H3F3B PE=1 SV=1	HUMAN	1
722	0	1.44	21.95	21.95	7.317	tr|B4DEB1|B4DEB1_HUMAN	Histone H3 OS=Homo sapiens GN=H3F3A PE=1 SV=1	HUMAN	1
722	0	1.39	14.16	14.16	7.965	tr|K7EP01|K7EP01_HUMAN	Histone H3.3 OS=Homo sapiens GN=H3F3B PE=1 SV=1	HUMAN	1
723	1.76	1.76	11.35	8.696	6.522	sp|Q12765|SCRN1_HUMAN	Secernin-1 OS=Homo sapiens GN=SCRN1 PE=1 SV=2	HUMAN	2
724	1.76	1.76	11.52	11.52	11.52	sp|Q9BXJ0|C1QT5_HUMAN	Complement C1q tumor necrosis factor-related protein 5 OS=Homo sapiens GN=C1QTNF5 PE=1 SV=1	HUMAN	2
725	1.75	4.67	43.9	24.39	16.59	sp|P62820|RAB1A_HUMAN	Ras-related protein Rab-1A OS=Homo sapiens GN=RAB1A PE=1 SV=3	HUMAN	3
725	0	3.88	41.62	22.54	13.29	tr|E7END7|E7END7_HUMAN	Ras-related protein Rab-1A OS=Homo sapiens GN=RAB1A PE=1 SV=1	HUMAN	2
726	1.72	3.85	2.453	1.338	1.338	sp|Q68D06|SLN13_HUMAN	Schlafen family member 13 OS=Homo sapiens GN=SLFN13 PE=2 SV=1	HUMAN	2
727	1.72	2.51	20.74	20.74	16.3	tr|F6RFD5|F6RFD5_HUMAN	Destrin OS=Homo sapiens GN=DSTN PE=1 SV=1	HUMAN	2
727	0	2.51	16.97	16.97	13.33	sp|P60981|DEST_HUMAN	Destrin OS=Homo sapiens GN=DSTN PE=1 SV=3	HUMAN	2
728	1.7	1.7	4.279	0.7924	0.7924	tr|Q5VZU9|Q5VZU9_HUMAN	Tripeptidyl-peptidase 2 OS=Homo sapiens GN=TPP2 PE=1 SV=1	HUMAN	1
728	0	1.7	3.683	0.8006	0.8006	sp|P29144|TPP2_HUMAN	Tripeptidyl-peptidase 2 OS=Homo sapiens GN=TPP2 PE=1 SV=4	HUMAN	1
729	1.7	1.7	9.479	5.213	5.213	sp|Q9NWM8|FKB14_HUMAN	Peptidyl-prolyl cis-trans isomerase FKBP14 OS=Homo sapiens GN=FKBP14 PE=1 SV=1	HUMAN	1
729	0	1.7	12.36	12.36	12.36	tr|H7C1Z9|H7C1Z9_HUMAN	Peptidyl-prolyl cis-trans isomerase (Fragment) OS=Homo sapiens GN=FKBP14 PE=1 SV=1	HUMAN	1
730	1.64	1.65	8.385	1.398	1.398	sp|P01042|KNG1_HUMAN	Kininogen-1 OS=Homo sapiens GN=KNG1 PE=1 SV=2	HUMAN	1
731	1.64	1.64	23.33	9.697	3.333	tr|B4DUT8|B4DUT8_HUMAN	Calponin OS=Homo sapiens GN=CNN2 PE=1 SV=1	HUMAN	1
731	0	1.64	25.84	10.74	3.691	tr|B4DDF4|B4DDF4_HUMAN	Calponin OS=Homo sapiens GN=CNN2 PE=1 SV=1	HUMAN	1
731	0	1.64	24.92	10.36	3.56	sp|Q99439|CNN2_HUMAN	Calponin-2 OS=Homo sapiens GN=CNN2 PE=1 SV=4	HUMAN	1
731	0	1.63	43.02	17.88	6.145	tr|A0A087X271|A0A087X271_HUMAN	Calponin (Fragment) OS=Homo sapiens GN=CNN2 PE=1 SV=1	HUMAN	1
731	0	1.54	35.14	14.19	7.432	tr|K7ES69|K7ES69_HUMAN	Calponin-2 OS=Homo sapiens GN=CNN2 PE=1 SV=1	HUMAN	1
732	1.64	1.64	7.797	2.339	1.17	tr|F5H6R4|F5H6R4_HUMAN	Zinc finger protein 26 OS=Homo sapiens GN=ZNF26 PE=1 SV=1	HUMAN	1
732	0	1.64	7.505	2.251	1.126	sp|P17031|ZNF26_HUMAN	Zinc finger protein 26 OS=Homo sapiens GN=ZNF26 PE=2 SV=3	HUMAN	1
732	0	1.58	10.78	0.6601	0.6601	RRRRRsp|O43184|ADA12_HUMAN	REVERSED Disintegrin and metalloproteinase domain-containing protein 12 OS=Homo sapiens GN=ADAM12 PE=1 SV=3	HUMAN	1
732	0	1.56	7.075	1.267	1.267	sp|Q14587|ZN268_HUMAN	Zinc finger protein 268 OS=Homo sapiens GN=ZNF268 PE=1 SV=2	HUMAN	1
732	0	1.55	3.988	0.9202	0.9202	sp|O94892|ZN432_HUMAN	Zinc finger protein 432 OS=Homo sapiens GN=ZNF432 PE=1 SV=1	HUMAN	1
732	0	1.55	3.39	3.39	3.39	sp|Q5VTH2|FLTOP_HUMAN	Protein Flattop OS=Homo sapiens GN=CFAP126 PE=2 SV=1	HUMAN	1
733	1.62	1.62	12.84	12.84	5.405	tr|H3BT71|H3BT71_HUMAN	RNA-binding motif protein, X chromosome OS=Homo sapiens GN=RBMX PE=1 SV=1	HUMAN	1
733	0	1.62	13.01	13.01	5.479	tr|H0Y6E7|H0Y6E7_HUMAN	RNA-binding motif protein, X chromosome (Fragment) OS=Homo sapiens GN=RBMX PE=1 SV=2	HUMAN	1
733	0	1.62	9.719	9.719	4.092	sp|P38159|RBMX_HUMAN	RNA-binding motif protein, X chromosome OS=Homo sapiens GN=RBMX PE=1 SV=3	HUMAN	1
734	1.62	1.62	7.489	7.489	3.084	sp|P00403|COX2_HUMAN	Cytochrome c oxidase subunit 2 OS=Homo sapiens GN=MT-CO2 PE=1 SV=1	HUMAN	1
735	1.61	1.61	5.877	3.246	0.9649	sp|Q16531|DDB1_HUMAN	DNA damage-binding protein 1 OS=Homo sapiens GN=DDB1 PE=1 SV=1	HUMAN	1
735	0	1.57	4.67	1.923	1.007	tr|F5GY55|F5GY55_HUMAN	DNA damage-binding protein 1 OS=Homo sapiens GN=DDB1 PE=1 SV=1	HUMAN	1
735	0	1.48	4.583	4.583	4.583	tr|F5H775|F5H775_HUMAN	DNA damage-binding protein 1 (Fragment) OS=Homo sapiens GN=DDB1 PE=1 SV=1	HUMAN	1
735	0	1.48	4.12	4.12	4.12	tr|F5H581|F5H581_HUMAN	DNA damage-binding protein 1 (Fragment) OS=Homo sapiens GN=DDB1 PE=1 SV=1	HUMAN	1
736	1.6	1.6	15.56	8.571	2.54	sp|P05198|IF2A_HUMAN	Eukaryotic translation initiation factor 2 subunit 1 OS=Homo sapiens GN=EIF2S1 PE=1 SV=3	HUMAN	1
736	0	1.6	13.55	5.495	2.93	tr|G3V4T5|G3V4T5_HUMAN	Eukaryotic translation initiation factor 2 subunit 1 (Fragment) OS=Homo sapiens GN=EIF2S1 PE=1 SV=1	HUMAN	1
736	0	1.6	11.9	5.952	3.175	tr|H0YJS4|H0YJS4_HUMAN	Eukaryotic translation initiation factor 2 subunit 1 (Fragment) OS=Homo sapiens GN=EIF2S1 PE=1 SV=1	HUMAN	1
737	1.6	1.6	9.677	6.452	6.452	sp|P09496|CLCA_HUMAN	Clathrin light chain A OS=Homo sapiens GN=CLTA PE=1 SV=1	HUMAN	2
738	1.58	5.66	40.82	37.14	14.69	sp|P27348|1433T_HUMAN	14-3-3 protein theta OS=Homo sapiens GN=YWHAQ PE=1 SV=1	HUMAN	4
738	0	3.28	40.94	35.57	17.45	tr|E9PG15|E9PG15_HUMAN	14-3-3 protein theta (Fragment) OS=Homo sapiens GN=YWHAQ PE=1 SV=1	HUMAN	3
739	1.58	1.58	11.88	6.176	3.325	sp|Q9UGI8|TES_HUMAN	Testin OS=Homo sapiens GN=TES PE=1 SV=1	HUMAN	1
739	0	1.55	17.72	17.72	17.72	tr|F8W7T0|F8W7T0_HUMAN	Testin (Fragment) OS=Homo sapiens GN=TES PE=1 SV=1	HUMAN	1
740	1.57	1.58	19.6	9.635	9.635	sp|P00387|NB5R3_HUMAN	NADH-cytochrome b5 reductase 3 OS=Homo sapiens GN=CYB5R3 PE=1 SV=3	HUMAN	2
740	0	1.57	36.73	19.73	19.73	tr|B1AHF3|B1AHF3_HUMAN	NADH-cytochrome b5 reductase 3 (Fragment) OS=Homo sapiens GN=CYB5R3 PE=1 SV=1	HUMAN	2
741	1.57	1.57	7.261	7.261	3.3	sp|Q9UBR2|CATZ_HUMAN	Cathepsin Z OS=Homo sapiens GN=CTSZ PE=1 SV=1	HUMAN	1
742	1.56	1.56	21.05	9.123	4.211	sp|O95865|DDAH2_HUMAN	N(G),N(G)-dimethylarginine dimethylaminohydrolase 2 OS=Homo sapiens GN=DDAH2 PE=1 SV=1	HUMAN	1
742	0	1.39	20.35	5.31	5.31	tr|Q5SSV3|Q5SSV3_HUMAN	N(G),N(G)-dimethylarginine dimethylaminohydrolase 2 (Fragment) OS=Homo sapiens GN=DDAH2 PE=1 SV=1	HUMAN	1
742	0	1.39	19.49	5.085	5.085	tr|Q5SRR8|Q5SRR8_HUMAN	N(G),N(G)-dimethylarginine dimethylaminohydrolase 2 (Fragment) OS=Homo sapiens GN=DDAH2 PE=1 SV=2	HUMAN	1
742	0	1.39	24.47	6.383	6.383	tr|H0Y7N1|H0Y7N1_HUMAN	N(G),N(G)-dimethylarginine dimethylaminohydrolase 2 (Fragment) OS=Homo sapiens GN=DDAH2 PE=1 SV=1	HUMAN	1
743	1.56	1.56	3.095	1.667	1.667	sp|Q86TJ2|TAD2B_HUMAN	Transcriptional adapter 2-beta OS=Homo sapiens GN=TADA2B PE=1 SV=2	HUMAN	1
744	1.54	1.54	10.29	4.545	4.545	sp|P43686|PRS6B_HUMAN	26S protease regulatory subunit 6B OS=Homo sapiens GN=PSMC4 PE=1 SV=2	HUMAN	1
745	1.54	1.54	4.234	2.419	2.419	tr|H7C3P4|H7C3P4_HUMAN	Glucosamine (N-acetyl)-6-sulfatase (Sanfilippo disease IIID), isoform CRA_b OS=Homo sapiens GN=GNS PE=1 SV=1	HUMAN	1
745	0	1.54	3.596	2.055	2.055	tr|F6S8M0|F6S8M0_HUMAN	N-acetylglucosamine-6-sulfatase OS=Homo sapiens GN=GNS PE=1 SV=1	HUMAN	1
745	0	1.54	8.502	4.858	4.858	tr|F5H4C6|F5H4C6_HUMAN	N-acetylglucosamine-6-sulfatase (Fragment) OS=Homo sapiens GN=GNS PE=1 SV=4	HUMAN	1
745	0	1.54	3.804	2.174	2.174	sp|P15586|GNS_HUMAN	N-acetylglucosamine-6-sulfatase OS=Homo sapiens GN=GNS PE=1 SV=3	HUMAN	1
746	1.53	90.72	66.96	56.44	55.82	tr|B1ALD9|B1ALD9_HUMAN	Periostin OS=Homo sapiens GN=POSTN PE=1 SV=1	HUMAN	78
747	1.53	1.53	10.04	4.585	3.275	sp|P15169|CBPN_HUMAN	Carboxypeptidase N catalytic chain OS=Homo sapiens GN=CPN1 PE=1 SV=1	HUMAN	1
747	0	1.5	10.29	7.353	7.353	tr|B1AP58|B1AP58_HUMAN	Carboxypeptidase N catalytic chain (Fragment) OS=Homo sapiens GN=CPN1 PE=1 SV=1	HUMAN	1
748	1.52	1.52	5.158	5.158	2.292	tr|J3KNQ3|J3KNQ3_HUMAN	26S proteasome non-ATPase regulatory subunit 13 OS=Homo sapiens GN=PSMD13 PE=1 SV=1	HUMAN	1
748	0	1.52	4.775	4.775	2.122	tr|A0A087WUL9|A0A087WUL9_HUMAN	26S proteasome non-ATPase regulatory subunit 13 OS=Homo sapiens GN=PSMD13 PE=1 SV=1	HUMAN	1
748	0	1.52	4.787	4.787	2.128	sp|Q9UNM6|PSD13_HUMAN	26S proteasome non-ATPase regulatory subunit 13 OS=Homo sapiens GN=PSMD13 PE=1 SV=2	HUMAN	1
749	1.52	1.52	3.989	1.994	1.994	tr|G5E9G0|G5E9G0_HUMAN	60S ribosomal protein L3 OS=Homo sapiens GN=RPL3 PE=1 SV=1	HUMAN	1
749	0	1.52	3.474	1.737	1.737	sp|P39023|RL3_HUMAN	60S ribosomal protein L3 OS=Homo sapiens GN=RPL3 PE=1 SV=2	HUMAN	1
749	0	1.52	2.295	2.295	2.295	tr|H7C422|H7C422_HUMAN	60S ribosomal protein L3 (Fragment) OS=Homo sapiens GN=RPL3 PE=1 SV=1	HUMAN	1
749	0	1.52	2.574	2.574	2.574	tr|B5MCW2|B5MCW2_HUMAN	60S ribosomal protein L3 (Fragment) OS=Homo sapiens GN=RPL3 PE=1 SV=1	HUMAN	1
750	1.51	1.53	14.67	7.609	3.804	sp|Q04760|LGUL_HUMAN	Lactoylglutathione lyase OS=Homo sapiens GN=GLO1 PE=1 SV=4	HUMAN	1
751	1.5	1.5	8.929	1.984	1.984	sp|Q13217|DNJC3_HUMAN	DnaJ homolog subfamily C member 3 OS=Homo sapiens GN=DNAJC3 PE=1 SV=1	HUMAN	1
751	0	1.49	6.181	2.208	2.208	tr|X6R9L0|X6R9L0_HUMAN	DnaJ homolog subfamily C member 3 OS=Homo sapiens GN=DNAJC3 PE=1 SV=1	HUMAN	1
752	1.5	1.5	13.36	4.049	4.049	sp|Q9UFN0|NPS3A_HUMAN	Protein NipSnap homolog 3A OS=Homo sapiens GN=NIPSNAP3A PE=1 SV=2	HUMAN	1
753	1.49	2.14	14.76	13.25	8.434	tr|R4GMT0|R4GMT0_HUMAN	Alpha-centractin OS=Homo sapiens GN=ACTR1A PE=1 SV=1	HUMAN	2
753	0	2.14	13.03	11.7	7.447	sp|P61163|ACTZ_HUMAN	Alpha-centractin OS=Homo sapiens GN=ACTR1A PE=1 SV=1	HUMAN	2
754	1.49	1.49	11.69	4.27	2.472	sp|P26572|MGAT1_HUMAN	Alpha-1,3-mannosyl-glycoprotein 2-beta-N-acetylglucosaminyltransferase OS=Homo sapiens GN=MGAT1 PE=1 SV=2	HUMAN	1
755	1.49	1.49	6.335	4.072	4.072	tr|A0A087X2B5|A0A087X2B5_HUMAN	Basigin (Fragment) OS=Homo sapiens GN=BSG PE=1 SV=1	HUMAN	1
755	0	1.49	7.407	4.762	4.762	tr|A0A087WUV8|A0A087WUV8_HUMAN	Basigin OS=Homo sapiens GN=BSG PE=1 SV=1	HUMAN	1
755	0	1.49	3.636	2.338	2.338	sp|P35613|BASI_HUMAN	Basigin OS=Homo sapiens GN=BSG PE=1 SV=2	HUMAN	1
755	0	1.48	10.71	10.71	10.71	tr|R4GMX5|R4GMX5_HUMAN	Basigin (Fragment) OS=Homo sapiens GN=BSG PE=1 SV=1	HUMAN	1
755	0	1.48	5.625	5.625	5.625	tr|I3L192|I3L192_HUMAN	Basigin (Fragment) OS=Homo sapiens GN=BSG PE=1 SV=4	HUMAN	1
756	1.49	1.49	7.143	4.911	4.911	sp|Q9UM22|EPDR1_HUMAN	Mammalian ependymin-related protein 1 OS=Homo sapiens GN=EPDR1 PE=1 SV=2	HUMAN	1
757	1.47	1.47	26.46	10.51	4.28	sp|P62917|RL8_HUMAN	60S ribosomal protein L8 OS=Homo sapiens GN=RPL8 PE=1 SV=2	HUMAN	1
757	0	1.47	30.24	13.17	5.366	tr|E9PKZ0|E9PKZ0_HUMAN	60S ribosomal protein L8 (Fragment) OS=Homo sapiens GN=RPL8 PE=1 SV=1	HUMAN	1
757	0	1.37	22.13	4.681	4.681	tr|E9PKU4|E9PKU4_HUMAN	60S ribosomal protein L8 (Fragment) OS=Homo sapiens GN=RPL8 PE=1 SV=1	HUMAN	1
757	0	1.37	20.27	7.432	7.432	tr|E9PP36|E9PP36_HUMAN	60S ribosomal protein L8 OS=Homo sapiens GN=RPL8 PE=1 SV=1	HUMAN	1
758	1.47	1.47	16.89	8.971	5.805	sp|P30740|ILEU_HUMAN	Leukocyte elastase inhibitor OS=Homo sapiens GN=SERPINB1 PE=1 SV=1	HUMAN	2
759	1.46	1.55	2.854	2.284	0.8563	sp|P26006|ITA3_HUMAN	Integrin alpha-3 OS=Homo sapiens GN=ITGA3 PE=1 SV=5	HUMAN	1
759	0	1.4	10.56	6.338	6.338	tr|D6R9X8|D6R9X8_HUMAN	Integrin alpha-3 OS=Homo sapiens GN=ITGA3 PE=1 SV=2	HUMAN	1
760	1.45	1.45	37.75	20.53	16.56	sp|O15511|ARPC5_HUMAN	Actin-related protein 2/3 complex subunit 5 OS=Homo sapiens GN=ARPC5 PE=1 SV=3	HUMAN	2
761	1.44	1.45	6.25	1.923	1.923	tr|E9PC52|E9PC52_HUMAN	Histone-binding protein RBBP7 OS=Homo sapiens GN=RBBP7 PE=1 SV=1	HUMAN	1
761	0	1.45	6.118	1.882	1.882	sp|Q16576|RBBP7_HUMAN	Histone-binding protein RBBP7 OS=Homo sapiens GN=RBBP7 PE=1 SV=1	HUMAN	1
761	0	1.44	6.118	1.882	1.882	sp|Q09028|RBBP4_HUMAN	Histone-binding protein RBBP4 OS=Homo sapiens GN=RBBP4 PE=1 SV=3	HUMAN	1
761	0	1.44	4.571	4.571	4.571	tr|Q5JP02|Q5JP02_HUMAN	Histone-binding protein RBBP7 (Fragment) OS=Homo sapiens GN=RBBP7 PE=1 SV=1	HUMAN	1
761	0	1.44	3.865	3.865	3.865	tr|H0YF10|H0YF10_HUMAN	Histone-binding protein RBBP4 (Fragment) OS=Homo sapiens GN=RBBP4 PE=1 SV=1	HUMAN	1
761	0	1.44	4.79	4.79	4.79	tr|H0YEU5|H0YEU5_HUMAN	Histone-binding protein RBBP4 (Fragment) OS=Homo sapiens GN=RBBP4 PE=1 SV=1	HUMAN	1
761	0	1.44	3.053	3.053	3.053	tr|H0YDK2|H0YDK2_HUMAN	Histone-binding protein RBBP4 (Fragment) OS=Homo sapiens GN=RBBP4 PE=1 SV=1	HUMAN	1
761	0	1.44	4.444	4.444	4.444	tr|H0YCT5|H0YCT5_HUMAN	Histone-binding protein RBBP4 (Fragment) OS=Homo sapiens GN=RBBP4 PE=1 SV=1	HUMAN	1
762	1.43	1.43	10.79	5.396	5.396	tr|K7ELJ7|K7ELJ7_HUMAN	Calpain small subunit 1 OS=Homo sapiens GN=CAPNS1 PE=1 SV=1	HUMAN	1
762	0	1.43	15.23	7.614	7.614	tr|A0A075B7C0|A0A075B7C0_HUMAN	Calpain small subunit 1 (Fragment) OS=Homo sapiens GN=CAPNS1 PE=1 SV=1	HUMAN	1
762	0	1.43	11.19	5.597	5.597	sp|P04632|CPNS1_HUMAN	Calpain small subunit 1 OS=Homo sapiens GN=CAPNS1 PE=1 SV=1	HUMAN	1
762	0	1.43	14.72	9.202	9.202	tr|K7EM73|K7EM73_HUMAN	Calpain small subunit 1 (Fragment) OS=Homo sapiens GN=CAPNS1 PE=1 SV=1	HUMAN	1
762	0	1.42	13.04	9.317	9.317	tr|U3KQE2|U3KQE2_HUMAN	Calpain small subunit 1 (Fragment) OS=Homo sapiens GN=CAPNS1 PE=1 SV=1	HUMAN	1
762	0	1.42	10.71	7.653	7.653	tr|K7EIV0|K7EIV0_HUMAN	Calpain small subunit 1 (Fragment) OS=Homo sapiens GN=CAPNS1 PE=1 SV=2	HUMAN	1
763	1.42	8.15	53.29	40.79	40.13	sp|P15531|NDKA_HUMAN	Nucleoside diphosphate kinase A OS=Homo sapiens GN=NME1 PE=1 SV=1	HUMAN	6
764	1.42	1.42	15.02	9.131	2.062	sp|P38646|GRP75_HUMAN	Stress-70 protein, mitochondrial OS=Homo sapiens GN=HSPA9 PE=1 SV=2	HUMAN	1
765	1.41	1.41	12.88	6.438	2.361	sp|O75390|CISY_HUMAN	Citrate synthase, mitochondrial OS=Homo sapiens GN=CS PE=1 SV=2	HUMAN	1
765	0	1.41	11.7	6.623	2.428	tr|B4DJV2|B4DJV2_HUMAN	Citrate synthase OS=Homo sapiens GN=CS PE=1 SV=1	HUMAN	1
765	0	1.33	21.95	17.89	8.943	tr|H0YIC4|H0YIC4_HUMAN	Citrate synthase (Fragment) OS=Homo sapiens GN=CS PE=1 SV=1	HUMAN	1
766	1.4	2.4	10.53	10.53	10.53	sp|P26583|HMGB2_HUMAN	High mobility group protein B2 OS=Homo sapiens GN=HMGB2 PE=1 SV=2	HUMAN	2
766	0	1.4	9.701	9.701	9.701	tr|D6R9A6|D6R9A6_HUMAN	High mobility group protein B2 (Fragment) OS=Homo sapiens GN=HMGB2 PE=1 SV=1	HUMAN	1
767	1.4	1.45	11.87	2.846	2.355	sp|P14735|IDE_HUMAN	Insulin-degrading enzyme OS=Homo sapiens GN=IDE PE=1 SV=4	HUMAN	2
768	1.4	1.41	15.11	5.448	1.582	tr|C9JMN2|C9JMN2_HUMAN	Collagen alpha-1(XI) chain (Fragment) OS=Homo sapiens GN=COL11A1 PE=1 SV=4	HUMAN	1
768	0	3.68	14.17	2.879	1.661	sp|P12107|COBA1_HUMAN	Collagen alpha-1(XI) chain OS=Homo sapiens GN=COL11A1 PE=1 SV=4	HUMAN	3
768	0	1.32	13.5	4.5	4.5	tr|H7C381|H7C381_HUMAN	Collagen alpha-1(XI) chain (Fragment) OS=Homo sapiens GN=COL11A1 PE=1 SV=1	HUMAN	1
769	1.4	1.4	12.71	5.326	3.78	sp|P50281|MMP14_HUMAN	Matrix metalloproteinase-14 OS=Homo sapiens GN=MMP14 PE=1 SV=3	HUMAN	2
770	1.4	1.4	21.83	10.56	6.338	sp|O60234|GMFG_HUMAN	Glia maturation factor gamma OS=Homo sapiens GN=GMFG PE=1 SV=1	HUMAN	1
770	0	1.4	18.84	10.87	6.522	tr|M0QYJ8|M0QYJ8_HUMAN	Glia maturation factor gamma OS=Homo sapiens GN=GMFG PE=1 SV=1	HUMAN	1
770	0	1.36	16.67	6	6	tr|G3V4P8|G3V4P8_HUMAN	Glia maturation factor beta (Fragment) OS=Homo sapiens GN=GMFB PE=1 SV=1	HUMAN	1
770	0	1.36	17.61	6.338	6.338	sp|P60983|GMFB_HUMAN	Glia maturation factor beta OS=Homo sapiens GN=GMFB PE=1 SV=2	HUMAN	1
770	0	1.35	19.27	8.257	8.257	tr|M0R0C1|M0R0C1_HUMAN	Glia maturation factor gamma OS=Homo sapiens GN=GMFG PE=1 SV=1	HUMAN	1
770	0	1.35	13.86	8.911	8.911	tr|M0R1D2|M0R1D2_HUMAN	Glia maturation factor gamma OS=Homo sapiens GN=GMFG PE=1 SV=1	HUMAN	1
770	0	1.35	15.05	9.677	9.677	tr|M0QYG8|M0QYG8_HUMAN	Glia maturation factor gamma OS=Homo sapiens GN=GMFG PE=1 SV=1	HUMAN	1
771	1.4	1.4	22.22	7.407	7.407	sp|P09382|LEG1_HUMAN	Galectin-1 OS=Homo sapiens GN=LGALS1 PE=1 SV=2	HUMAN	1
771	0	1.39	26.32	26.32	26.32	tr|F8WEI7|F8WEI7_HUMAN	Galectin-1 OS=Homo sapiens GN=LGALS1 PE=1 SV=1	HUMAN	1
772	1.4	1.4	9.821	9.821	9.821	tr|A0A075B6K0|A0A075B6K0_HUMAN	HCG2041221 (Fragment) OS=Homo sapiens GN=IGLV3-16 PE=1 SV=1	HUMAN	1
772	0	1.4	9.821	9.821	9.821	tr|A0A075B6J4|A0A075B6J4_HUMAN	Protein IGLV3-25 (Fragment) OS=Homo sapiens GN=IGLV3-25 PE=1 SV=2	HUMAN	1
772	0	1.4	9.735	9.735	9.735	tr|A0A075B6J3|A0A075B6J3_HUMAN	Protein IGLV3-27 (Fragment) OS=Homo sapiens GN=IGLV3-27 PE=1 SV=1	HUMAN	1
773	1.39	1.47	7.869	7.869	5.574	sp|Q13151|ROA0_HUMAN	Heterogeneous nuclear ribonucleoprotein A0 OS=Homo sapiens GN=HNRNPA0 PE=1 SV=1	HUMAN	1
774	1.38	1.38	20.48	16.67	16.67	sp|Q96IU4|ABHEB_HUMAN	Alpha/beta hydrolase domain-containing protein 14B OS=Homo sapiens GN=ABHD14B PE=1 SV=1	HUMAN	3
775	1.37	5.25	34.23	27.18	15.44	sp|P05141|ADT2_HUMAN	ADP/ATP translocase 2 OS=Homo sapiens GN=SLC25A5 PE=1 SV=7	HUMAN	5
776	1.37	1.37	4.911	4.911	4.911	tr|C9JYN0|C9JYN0_HUMAN	Synaptophysin-like protein 1 OS=Homo sapiens GN=SYPL1 PE=1 SV=1	HUMAN	1
776	0	1.37	4.247	4.247	4.247	sp|Q16563|SYPL1_HUMAN	Synaptophysin-like protein 1 OS=Homo sapiens GN=SYPL1 PE=1 SV=1	HUMAN	1
777	1.36	1.36	15.7	15.7	4.07	tr|A0A087X0R6|A0A087X0R6_HUMAN	Sorting nexin-12 OS=Homo sapiens GN=SNX12 PE=1 SV=1	HUMAN	1
777	0	1.36	15.7	15.7	4.07	sp|Q9UMY4|SNX12_HUMAN	Sorting nexin-12 OS=Homo sapiens GN=SNX12 PE=1 SV=3	HUMAN	1
778	1.34	1.34	13.47	13.47	13.47	tr|G5E9W8|G5E9W8_HUMAN	Glycogenin 1, isoform CRA_e OS=Homo sapiens GN=GYG1 PE=1 SV=1	HUMAN	2
778	0	1.34	9.811	9.811	9.811	tr|C9JQ42|C9JQ42_HUMAN	Glycogenin-1 (Fragment) OS=Homo sapiens GN=GYG1 PE=1 SV=4	HUMAN	2
778	0	1.34	7.429	7.429	7.429	sp|P46976|GLYG_HUMAN	Glycogenin-1 OS=Homo sapiens GN=GYG1 PE=1 SV=4	HUMAN	2
779	1.3	1.32	9.627	4.322	2.161	tr|H3BS10|H3BS10_HUMAN	Beta-hexosaminidase OS=Homo sapiens GN=HEXA PE=1 SV=1	HUMAN	1
779	0	1.32	9.074	4.074	2.037	tr|H3BP20|H3BP20_HUMAN	Beta-hexosaminidase OS=Homo sapiens GN=HEXA PE=1 SV=1	HUMAN	1
779	0	1.32	9.263	4.159	2.079	sp|P06865|HEXA_HUMAN	Beta-hexosaminidase subunit alpha OS=Homo sapiens GN=HEXA PE=1 SV=2	HUMAN	1
780	1.29	1.32	10.65	10.65	6.509	tr|E9PKT8|E9PKT8_HUMAN	Nucleosome assembly protein 1-like 4 (Fragment) OS=Homo sapiens GN=NAP1L4 PE=1 SV=1	HUMAN	1
780	0	1.32	6.475	6.475	3.957	tr|C9JZI7|C9JZI7_HUMAN	Nucleosome assembly protein 1-like 4 (Fragment) OS=Homo sapiens GN=NAP1L4 PE=1 SV=1	HUMAN	1
780	0	1.32	10.11	10.11	6.18	tr|C9J6D1|C9J6D1_HUMAN	Nucleosome assembly protein 1-like 4 (Fragment) OS=Homo sapiens GN=NAP1L4 PE=1 SV=1	HUMAN	1
780	0	1.32	11.54	11.54	7.051	tr|A8MXH2|A8MXH2_HUMAN	Nucleosome assembly protein 1-like 4 (Fragment) OS=Homo sapiens GN=NAP1L4 PE=1 SV=2	HUMAN	1
780	0	1.32	4.8	4.8	2.933	sp|Q99733|NP1L4_HUMAN	Nucleosome assembly protein 1-like 4 OS=Homo sapiens GN=NAP1L4 PE=1 SV=1	HUMAN	1
780	0	1.29	5.392	5.392	5.392	tr|H0YCI4|H0YCI4_HUMAN	Nucleosome assembly protein 1-like 4 (Fragment) OS=Homo sapiens GN=NAP1L4 PE=1 SV=1	HUMAN	1
781	1.29	1.29	21.16	9.959	9.959	sp|P78417|GSTO1_HUMAN	Glutathione S-transferase omega-1 OS=Homo sapiens GN=GSTO1 PE=1 SV=2	HUMAN	2
782	1.28	1.29	9.401	2.35	0.7051	sp|Q63ZY3|KANK2_HUMAN	KN motif and ankyrin repeat domain-containing protein 2 OS=Homo sapiens GN=KANK2 PE=1 SV=1	HUMAN	1
782	0	1.23	11.48	11.48	4.918	tr|K7ERU2|K7ERU2_HUMAN	KN motif and ankyrin repeat domain-containing protein 2 (Fragment) OS=Homo sapiens GN=KANK2 PE=1 SV=1	HUMAN	1
783	1.27	1.27	28.51	6.579	6.579	tr|H0YM70|H0YM70_HUMAN	Proteasome activator complex subunit 2 OS=Homo sapiens GN=PSME2 PE=1 SV=1	HUMAN	1
783	0	1.27	25.59	5.906	5.906	tr|A0A087X1Z3|A0A087X1Z3_HUMAN	Proteasome activator complex subunit 2 OS=Homo sapiens GN=PSME2 PE=1 SV=1	HUMAN	1
783	0	1.27	27.2	6.276	6.276	sp|Q9UL46|PSME2_HUMAN	Proteasome activator complex subunit 2 OS=Homo sapiens GN=PSME2 PE=1 SV=4	HUMAN	1
784	1.27	1.27	7.163	3.792	1.966	tr|E7EWE5|E7EWE5_HUMAN	Peroxisomal multifunctional enzyme type 2 OS=Homo sapiens GN=HSD17B4 PE=1 SV=1	HUMAN	1
784	0	1.27	6.929	3.668	1.902	sp|P51659|DHB4_HUMAN	Peroxisomal multifunctional enzyme type 2 OS=Homo sapiens GN=HSD17B4 PE=1 SV=3	HUMAN	1
784	0	1.27	6.208	4.53	2.349	tr|G5E9S2|G5E9S2_HUMAN	Hydroxysteroid (17-beta) dehydrogenase 4, isoform CRA_a OS=Homo sapiens GN=HSD17B4 PE=1 SV=1	HUMAN	1
784	0	1.27	6.177	4.508	2.337	tr|E7ET17|E7ET17_HUMAN	Peroxisomal multifunctional enzyme type 2 OS=Homo sapiens GN=HSD17B4 PE=1 SV=1	HUMAN	1
784	0	1.27	7.8	4.2	2.8	tr|E7ER27|E7ER27_HUMAN	Peroxisomal multifunctional enzyme type 2 OS=Homo sapiens GN=HSD17B4 PE=1 SV=3	HUMAN	1
784	0	1.27	6.962	5.696	2.954	tr|E7EPL9|E7EPL9_HUMAN	Peroxisomal multifunctional enzyme type 2 OS=Homo sapiens GN=HSD17B4 PE=1 SV=1	HUMAN	1
785	1.27	1.27	48.42	12.63	12.63	sp|P61956|SUMO2_HUMAN	Small ubiquitin-related modifier 2 OS=Homo sapiens GN=SUMO2 PE=1 SV=3	HUMAN	1
785	0	1.25	27.41	8.889	8.889	tr|A8MUA9|A8MUA9_HUMAN	SMT3 suppressor of mif two 3 homolog 3 (Yeast), isoform CRA_d OS=Homo sapiens GN=SUMO3 PE=1 SV=1	HUMAN	1
785	0	1.25	30.53	12.63	12.63	sp|Q6EEV6|SUMO4_HUMAN	Small ubiquitin-related modifier 4 OS=Homo sapiens GN=SUMO4 PE=1 SV=2	HUMAN	1
785	0	1.25	17.69	8.163	8.163	tr|A8MU27|A8MU27_HUMAN	Small ubiquitin-related modifier 3 OS=Homo sapiens GN=SUMO3 PE=1 SV=1	HUMAN	1
785	0	1.25	25.24	11.65	11.65	sp|P55854|SUMO3_HUMAN	Small ubiquitin-related modifier 3 OS=Homo sapiens GN=SUMO3 PE=1 SV=2	HUMAN	1
786	1.27	1.27	11.74	9.848	6.061	sp|P40261|NNMT_HUMAN	Nicotinamide N-methyltransferase OS=Homo sapiens GN=NNMT PE=1 SV=1	HUMAN	2
786	0	1.2	23.19	23.19	23.19	tr|F5H0R4|F5H0R4_HUMAN	Nicotinamide N-methyltransferase OS=Homo sapiens GN=NNMT PE=1 SV=1	HUMAN	2
787	1.27	1.27	17.71	10.42	6.25	sp|P63000|RAC1_HUMAN	Ras-related C3 botulinum toxin substrate 1 OS=Homo sapiens GN=RAC1 PE=1 SV=1	HUMAN	1
788	1.25	1.25	20.73	4.663	4.663	tr|J3QR09|J3QR09_HUMAN	Ribosomal protein L19 OS=Homo sapiens GN=RPL19 PE=1 SV=1	HUMAN	1
788	0	1.25	20.62	4.639	4.639	tr|J3KTE4|J3KTE4_HUMAN	Ribosomal protein L19 OS=Homo sapiens GN=RPL19 PE=1 SV=1	HUMAN	1
788	0	1.25	20.41	4.592	4.592	sp|P84098|RL19_HUMAN	60S ribosomal protein L19 OS=Homo sapiens GN=RPL19 PE=1 SV=1	HUMAN	1
789	1.25	1.25	9.962	5.364	5.364	sp|Q99714|HCD2_HUMAN	3-hydroxyacyl-CoA dehydrogenase type-2 OS=Homo sapiens GN=HSD17B10 PE=1 SV=3	HUMAN	2
790	1.25	1.25	2.339	1.657	1.657	tr|E7EN73|E7EN73_HUMAN	Dyslexia-associated protein KIAA0319-like protein (Fragment) OS=Homo sapiens GN=KIAA0319L PE=1 SV=1	HUMAN	1
790	0	1.25	8.791	6.227	6.227	tr|C9JVB2|C9JVB2_HUMAN	Dyslexia-associated protein KIAA0319-like protein (Fragment) OS=Homo sapiens GN=KIAA0319L PE=1 SV=1	HUMAN	1
790	0	1.25	6.977	4.942	4.942	tr|B4DYG9|B4DYG9_HUMAN	Dyslexia-associated protein KIAA0319-like protein OS=Homo sapiens GN=KIAA0319L PE=1 SV=1	HUMAN	1
790	0	1.25	3.504	2.482	2.482	tr|B1AN15|B1AN15_HUMAN	Dyslexia-associated protein KIAA0319-like protein (Fragment) OS=Homo sapiens GN=KIAA0319L PE=1 SV=1	HUMAN	1
790	0	1.25	2.288	1.621	1.621	sp|Q8IZA0|K319L_HUMAN	Dyslexia-associated protein KIAA0319-like protein OS=Homo sapiens GN=KIAA0319L PE=1 SV=2	HUMAN	1
790	0	1.25	5.592	5.592	5.592	tr|H0Y4S8|H0Y4S8_HUMAN	Dyslexia-associated protein KIAA0319-like protein (Fragment) OS=Homo sapiens GN=KIAA0319L PE=1 SV=1	HUMAN	1
791	1.25	1.25	23.36	23.36	23.36	sp|P17096|HMGA1_HUMAN	High mobility group protein HMG-I/HMG-Y OS=Homo sapiens GN=HMGA1 PE=1 SV=3	HUMAN	1
792	1.24	6.03	35.66	35.66	35.66	sp|Q9BTM1|H2AJ_HUMAN	Histone H2A.J OS=Homo sapiens GN=H2AFJ PE=1 SV=1	HUMAN	4
792	0	6.03	35.94	35.94	35.94	sp|Q99878|H2A1J_HUMAN	Histone H2A type 1-J OS=Homo sapiens GN=HIST1H2AJ PE=1 SV=3	HUMAN	4
792	0	6.03	35.94	35.94	35.94	sp|Q96KK5|H2A1H_HUMAN	Histone H2A type 1-H OS=Homo sapiens GN=HIST1H2AH PE=1 SV=3	HUMAN	4
792	0	6.03	35.38	35.38	35.38	sp|Q6FI13|H2A2A_HUMAN	Histone H2A type 2-A OS=Homo sapiens GN=HIST2H2AA3 PE=1 SV=3	HUMAN	4
792	0	6.03	35.66	35.66	35.66	sp|Q16777|H2A2C_HUMAN	Histone H2A type 2-C OS=Homo sapiens GN=HIST2H2AC PE=1 SV=4	HUMAN	4
792	0	6.03	35.38	35.38	35.38	sp|P20671|H2A1D_HUMAN	Histone H2A type 1-D OS=Homo sapiens GN=HIST1H2AD PE=1 SV=2	HUMAN	4
792	0	6.03	35.38	35.38	35.38	sp|P0C0S8|H2A1_HUMAN	Histone H2A type 1 OS=Homo sapiens GN=HIST1H2AG PE=1 SV=2	HUMAN	4
792	0	3.89	40.22	40.22	40.22	tr|H0YFX9|H0YFX9_HUMAN	Histone H2A (Fragment) OS=Homo sapiens GN=H2AFJ PE=1 SV=1	HUMAN	3
793	1.23	1.23	10.26	3.311	3.311	sp|P19623|SPEE_HUMAN	Spermidine synthase OS=Homo sapiens GN=SRM PE=1 SV=1	HUMAN	1
793	0	1.23	20.48	12.05	12.05	tr|K7EL89|K7EL89_HUMAN	Spermidine synthase (Fragment) OS=Homo sapiens GN=SRM PE=1 SV=1	HUMAN	1
794	1.23	1.23	5.68	2.434	2.434	tr|E7ETB3|E7ETB3_HUMAN	Aspartyl aminopeptidase OS=Homo sapiens GN=DNPEP PE=1 SV=2	HUMAN	1
794	0	1.23	5.895	2.526	2.526	sp|Q9ULA0|DNPEP_HUMAN	Aspartyl aminopeptidase OS=Homo sapiens GN=DNPEP PE=1 SV=1	HUMAN	1
794	0	1.23	2.927	2.927	2.927	tr|E7EMB6|E7EMB6_HUMAN	Aspartyl aminopeptidase OS=Homo sapiens GN=DNPEP PE=1 SV=2	HUMAN	1
795	1.22	2.57	7.765	3.358	1.574	sp|P53618|COPB_HUMAN	Coatomer subunit beta OS=Homo sapiens GN=COPB1 PE=1 SV=3	HUMAN	2
796	1.21	1.22	13.04	7.391	1.522	tr|E9PFW3|E9PFW3_HUMAN	AP-2 complex subunit mu OS=Homo sapiens GN=AP2M1 PE=1 SV=1	HUMAN	1
796	0	1.22	13.82	7.834	1.613	tr|A0A087WY71|A0A087WY71_HUMAN	AP-2 complex subunit mu OS=Homo sapiens GN=AP2M1 PE=1 SV=1	HUMAN	1
796	0	1.22	13.79	7.816	1.609	sp|Q96CW1|AP2M1_HUMAN	AP-2 complex subunit mu OS=Homo sapiens GN=AP2M1 PE=1 SV=2	HUMAN	1
796	0	1.17	20.24	9.921	2.778	tr|C9JJ47|C9JJ47_HUMAN	AP-2 complex subunit mu (Fragment) OS=Homo sapiens GN=AP2M1 PE=1 SV=1	HUMAN	1
797	1.21	1.21	11.83	5.325	5.325	tr|K7EP07|K7EP07_HUMAN	Tubulin-folding cofactor B (Fragment) OS=Homo sapiens GN=TBCB PE=1 SV=4	HUMAN	1
797	0	1.21	10.47	4.712	4.712	tr|K7EK42|K7EK42_HUMAN	Tubulin-folding cofactor B OS=Homo sapiens GN=TBCB PE=1 SV=1	HUMAN	1
797	0	1.21	8.197	3.689	3.689	sp|Q99426|TBCB_HUMAN	Tubulin-folding cofactor B OS=Homo sapiens GN=TBCB PE=1 SV=2	HUMAN	1
797	0	1.21	15.79	6.767	6.767	tr|K7EL99|K7EL99_HUMAN	Tubulin-folding cofactor B (Fragment) OS=Homo sapiens GN=TBCB PE=1 SV=2	HUMAN	1
798	1.2	3.32	18.46	6.336	4.408	tr|A0A087WUK2|A0A087WUK2_HUMAN	Heterogeneous nuclear ribonucleoprotein D-like OS=Homo sapiens GN=HNRNPDL PE=1 SV=1	HUMAN	2
798	0	3.32	15.95	5.476	3.81	sp|O14979|HNRDL_HUMAN	Heterogeneous nuclear ribonucleoprotein D-like OS=Homo sapiens GN=HNRNPDL PE=1 SV=3	HUMAN	2
799	1.19	1.22	5.702	3.509	3.509	sp|Q9Y265|RUVB1_HUMAN	RuvB-like 1 OS=Homo sapiens GN=RUVBL1 PE=1 SV=1	HUMAN	1
799	0	1.19	16.03	12.21	12.21	tr|J3QLR1|J3QLR1_HUMAN	RuvB-like 1 (Fragment) OS=Homo sapiens GN=RUVBL1 PE=1 SV=1	HUMAN	1
799	0	1.19	7.865	5.993	5.993	tr|H7C4G5|H7C4G5_HUMAN	RuvB-like 1 (Fragment) OS=Homo sapiens GN=RUVBL1 PE=1 SV=1	HUMAN	1
799	0	1.19	7.207	7.207	7.207	tr|H7C4I3|H7C4I3_HUMAN	RuvB-like 1 (Fragment) OS=Homo sapiens GN=RUVBL1 PE=1 SV=1	HUMAN	1
799	0	1.19	5.079	5.079	5.079	tr|E7ETR0|E7ETR0_HUMAN	RuvB-like 1 OS=Homo sapiens GN=RUVBL1 PE=1 SV=1	HUMAN	1
800	1.19	1.2	32	17.33	17.33	tr|J3QLI9|J3QLI9_HUMAN	Small nuclear ribonucleoprotein Sm D1 OS=Homo sapiens GN=SNRPD1 PE=1 SV=1	HUMAN	1
800	0	1.2	20.17	10.92	10.92	sp|P62314|SMD1_HUMAN	Small nuclear ribonucleoprotein Sm D1 OS=Homo sapiens GN=SNRPD1 PE=1 SV=1	HUMAN	1
801	1.19	1.19	19.11	5.732	4.246	sp|Q15233|NONO_HUMAN	Non-POU domain-containing octamer-binding protein OS=Homo sapiens GN=NONO PE=1 SV=4	HUMAN	2
801	0	1.19	17.87	13.04	9.662	tr|C9IZL7|C9IZL7_HUMAN	Non-POU domain-containing octamer-binding protein (Fragment) OS=Homo sapiens GN=NONO PE=1 SV=1	HUMAN	2
802	1.19	1.19	21.97	8.671	8.671	sp|Q969H8|CS010_HUMAN	UPF0556 protein C19orf10 OS=Homo sapiens GN=C19orf10 PE=1 SV=1	HUMAN	1
802	0	1.19	16.93	7.937	7.937	tr|M0QYN0|M0QYN0_HUMAN	UPF0556 protein C19orf10 OS=Homo sapiens GN=C19orf10 PE=1 SV=1	HUMAN	1
802	0	1.19	38.1	17.86	17.86	tr|M0QXF7|M0QXF7_HUMAN	UPF0556 protein C19orf10 (Fragment) OS=Homo sapiens GN=C19orf10 PE=1 SV=1	HUMAN	1
803	1.17	1.17	7.432	7.432	7.432	tr|A6NLM8|A6NLM8_HUMAN	Translocon-associated protein subunit delta OS=Homo sapiens GN=SSR4 PE=1 SV=1	HUMAN	1
803	0	1.17	6.358	6.358	6.358	sp|P51571|SSRD_HUMAN	Translocon-associated protein subunit delta OS=Homo sapiens GN=SSR4 PE=1 SV=1	HUMAN	1
804	1.16	1.16	30.43	20	12.17	sp|P62888|RL30_HUMAN	60S ribosomal protein L30 OS=Homo sapiens GN=RPL30 PE=1 SV=2	HUMAN	2
804	0	1.1	22.81	12.28	12.28	tr|E5RI99|E5RI99_HUMAN	60S ribosomal protein L30 (Fragment) OS=Homo sapiens GN=RPL30 PE=1 SV=1	HUMAN	2
804	0	1.1	25	25	25	tr|E5RJH3|E5RJH3_HUMAN	60S ribosomal protein L30 OS=Homo sapiens GN=RPL30 PE=1 SV=1	HUMAN	2
805	1.15	1.19	12.32	8.128	2.463	sp|Q9BS26|ERP44_HUMAN	Endoplasmic reticulum resident protein 44 OS=Homo sapiens GN=ERP44 PE=1 SV=1	HUMAN	1
806	1.15	1.15	20.12	3.604	3.604	sp|P07711|CATL1_HUMAN	Cathepsin L1 OS=Homo sapiens GN=CTSL PE=1 SV=2	HUMAN	1
806	0	1.15	22.22	5.333	5.333	tr|Q5T8F0|Q5T8F0_HUMAN	Cathepsin L1 OS=Homo sapiens GN=CTSL PE=1 SV=1	HUMAN	1
807	1.15	1.15	6.173	3.704	3.704	tr|F8VVM2|F8VVM2_HUMAN	Phosphate carrier protein, mitochondrial OS=Homo sapiens GN=SLC25A3 PE=1 SV=1	HUMAN	1
807	0	1.15	5.525	3.315	3.315	sp|Q00325|MPCP_HUMAN	Phosphate carrier protein, mitochondrial OS=Homo sapiens GN=SLC25A3 PE=1 SV=2	HUMAN	1
808	1.13	1.28	20.3	6.273	4.428	tr|A0A0A0MSW4|A0A0A0MSW4_HUMAN	Phosphatidylinositol transfer protein beta isoform OS=Homo sapiens GN=PITPNB PE=1 SV=1	HUMAN	1
808	0	1.28	13.65	6.273	4.428	sp|P48739|PIPNB_HUMAN	Phosphatidylinositol transfer protein beta isoform OS=Homo sapiens GN=PITPNB PE=1 SV=2	HUMAN	1
808	0	1.13	20.96	7.186	7.186	tr|B3KYB7|B3KYB7_HUMAN	Phosphatidylinositol transfer protein beta isoform (Fragment) OS=Homo sapiens GN=PITPNB PE=1 SV=4	HUMAN	1
808	0	1.13	20.83	10	10	tr|B3KYB6|B3KYB6_HUMAN	Phosphatidylinositol transfer protein beta isoform (Fragment) OS=Homo sapiens GN=PITPNB PE=1 SV=1	HUMAN	1
809	1.11	1.11	6.211	6.211	2.277	sp|P26196|DDX6_HUMAN	Probable ATP-dependent RNA helicase DDX6 OS=Homo sapiens GN=DDX6 PE=1 SV=2	HUMAN	1
809	0	1.04	5.882	5.882	5.882	tr|Q8IV96|Q8IV96_HUMAN	DDX6 protein OS=Homo sapiens GN=DDX6 PE=1 SV=1	HUMAN	1
810	1.09	2.47	9.626	9.626	9.626	sp|Q96SL4|GPX7_HUMAN	Glutathione peroxidase 7 OS=Homo sapiens GN=GPX7 PE=1 SV=1	HUMAN	2
811	1.09	1.09	19.81	6.28	4.106	sp|O75874|IDHC_HUMAN	Isocitrate dehydrogenase [NADP] cytoplasmic OS=Homo sapiens GN=IDH1 PE=1 SV=2	HUMAN	1
812	1.08	1.08	4.548	1.475	0.4917	sp|Q13219|PAPP1_HUMAN	Pappalysin-1 OS=Homo sapiens GN=PAPPA PE=1 SV=3	HUMAN	1
813	1.07	1.07	7.861	0.7699	0.4052	sp|P46821|MAP1B_HUMAN	Microtubule-associated protein 1B OS=Homo sapiens GN=MAP1B PE=1 SV=2	HUMAN	1
813	0	0.95	3.603	0.3568	0.3568	sp|P78559|MAP1A_HUMAN	Microtubule-associated protein 1A OS=Homo sapiens GN=MAP1A PE=1 SV=6	HUMAN	1
813	0	0.89	3.321	0.3288	0.3288	tr|E9PGC8|E9PGC8_HUMAN	Microtubule-associated protein 1A OS=Homo sapiens GN=MAP1A PE=1 SV=1	HUMAN	1
814	1.07	1.07	10.37	10.37	10.37	tr|C9IZG4|C9IZG4_HUMAN	Protein CutA OS=Homo sapiens GN=CUTA PE=1 SV=1	HUMAN	1
814	0	1.07	7.821	7.821	7.821	sp|O60888|CUTA_HUMAN	Protein CutA OS=Homo sapiens GN=CUTA PE=1 SV=2	HUMAN	1
815	1.06	1.15	14.08	4.773	3.341	sp|P17540|KCRS_HUMAN	Creatine kinase S-type, mitochondrial OS=Homo sapiens GN=CKMT2 PE=1 SV=2	HUMAN	1
816	1.06	1.06	10.94	3.04	3.04	sp|Q14914|PTGR1_HUMAN	Prostaglandin reductase 1 OS=Homo sapiens GN=PTGR1 PE=1 SV=2	HUMAN	1
817	1.06	1.06	17	5	5	sp|P61086|UBE2K_HUMAN	Ubiquitin-conjugating enzyme E2 K OS=Homo sapiens GN=UBE2K PE=1 SV=3	HUMAN	1
818	1.06	1.06	19.78	6.044	6.044	sp|P36405|ARL3_HUMAN	ADP-ribosylation factor-like protein 3 OS=Homo sapiens GN=ARL3 PE=1 SV=2	HUMAN	1
819	1.05	1.08	16.67	3.07	3.07	sp|Q9HB71|CYBP_HUMAN	Calcyclin-binding protein OS=Homo sapiens GN=CACYBP PE=1 SV=2	HUMAN	1
820	1.05	1.05	20.63	3.147	3.147	tr|H7BY58|H7BY58_HUMAN	Protein-L-isoaspartate O-methyltransferase OS=Homo sapiens GN=PCMT1 PE=1 SV=1	HUMAN	1
820	0	1.05	20.7	3.158	3.158	tr|A0A0A0MRJ6|A0A0A0MRJ6_HUMAN	Protein-L-isoaspartate(D-aspartate) O-methyltransferase OS=Homo sapiens GN=PCMT1 PE=1 SV=1	HUMAN	1
820	0	1.05	25.99	3.965	3.965	sp|P22061|PIMT_HUMAN	Protein-L-isoaspartate(D-aspartate) O-methyltransferase OS=Homo sapiens GN=PCMT1 PE=1 SV=4	HUMAN	1
820	0	1.05	20.8	3.6	3.6	tr|F6S8N6|F6S8N6_HUMAN	Protein-L-isoaspartate O-methyltransferase OS=Homo sapiens GN=PCMT1 PE=1 SV=1	HUMAN	1
821	1.03	1.03	15.99	10.03	3.794	sp|P50502|F10A1_HUMAN	Hsc70-interacting protein OS=Homo sapiens GN=ST13 PE=1 SV=2	HUMAN	1
821	0	1.03	19.91	17.54	6.635	tr|Q3KNR6|Q3KNR6_HUMAN	Hsc70-interacting protein OS=Homo sapiens GN=ST13 PE=1 SV=1	HUMAN	1
821	0	1.03	17.5	15.42	5.833	sp|Q8IZP2|ST134_HUMAN	Putative protein FAM10A4 OS=Homo sapiens GN=ST13P4 PE=5 SV=1	HUMAN	1
821	0	1.01	36.99	25.34	9.589	tr|H7C3I1|H7C3I1_HUMAN	Hsc70-interacting protein (Fragment) OS=Homo sapiens GN=ST13 PE=1 SV=1	HUMAN	1
821	0	1.01	21.26	14.57	5.512	tr|A0A087X1H6|A0A087X1H6_HUMAN	Hsc70-interacting protein OS=Homo sapiens GN=ST13 PE=1 SV=1	HUMAN	1
821	0	1.01	22.84	22.84	8.642	tr|F6VDH7|F6VDH7_HUMAN	Hsc70-interacting protein (Fragment) OS=Homo sapiens GN=ST13 PE=1 SV=1	HUMAN	1
822	1.02	1.32	8.752	3.73	1.722	tr|E9PRY8|E9PRY8_HUMAN	Elongation factor 1-delta OS=Homo sapiens GN=EEF1D PE=1 SV=1	HUMAN	1
822	0	1.32	9.667	4.12	1.902	tr|A0A087X1X7|A0A087X1X7_HUMAN	Elongation factor 1-delta OS=Homo sapiens GN=EEF1D PE=1 SV=1	HUMAN	1
822	0	1.32	21.84	9.962	4.598	tr|E9PK01|E9PK01_HUMAN	Elongation factor 1-delta (Fragment) OS=Homo sapiens GN=EEF1D PE=1 SV=1	HUMAN	1
822	0	1.32	20.28	9.253	4.27	sp|P29692|EF1D_HUMAN	Elongation factor 1-delta OS=Homo sapiens GN=EEF1D PE=1 SV=5	HUMAN	1
822	0	1.32	23.53	13.9	6.417	tr|E9PL71|E9PL71_HUMAN	Elongation factor 1-delta (Fragment) OS=Homo sapiens GN=EEF1D PE=1 SV=1	HUMAN	1
822	0	1.32	21.57	12.75	5.882	tr|E9PI39|E9PI39_HUMAN	Elongation factor 1-delta (Fragment) OS=Homo sapiens GN=EEF1D PE=1 SV=1	HUMAN	1
822	0	1.02	18.1	9.524	5.714	tr|H0YCK7|H0YCK7_HUMAN	Elongation factor 1-delta (Fragment) OS=Homo sapiens GN=EEF1D PE=1 SV=1	HUMAN	1
822	0	1.02	19.19	10.1	6.061	tr|E9PQ49|E9PQ49_HUMAN	Elongation factor 1-delta (Fragment) OS=Homo sapiens GN=EEF1D PE=1 SV=4	HUMAN	1
822	0	1.02	22.89	12.05	7.229	tr|E9PPR1|E9PPR1_HUMAN	Elongation factor 1-delta (Fragment) OS=Homo sapiens GN=EEF1D PE=1 SV=1	HUMAN	1
822	0	1.02	35.85	18.87	11.32	tr|E9PN91|E9PN91_HUMAN	Elongation factor 1-delta OS=Homo sapiens GN=EEF1D PE=1 SV=1	HUMAN	1
822	0	1.02	29.23	15.38	9.231	tr|E9PMW7|E9PMW7_HUMAN	Elongation factor 1-delta OS=Homo sapiens GN=EEF1D PE=1 SV=1	HUMAN	1
822	0	1.02	22.62	11.9	7.143	tr|E9PL12|E9PL12_HUMAN	Elongation factor 1-delta (Fragment) OS=Homo sapiens GN=EEF1D PE=1 SV=1	HUMAN	1
822	0	1.02	27.74	14.6	8.759	tr|E9PIZ1|E9PIZ1_HUMAN	Elongation factor 1-delta (Fragment) OS=Homo sapiens GN=EEF1D PE=1 SV=1	HUMAN	1
823	1.01	1.01	26.22	5.488	5.488	sp|P84103|SRSF3_HUMAN	Serine/arginine-rich splicing factor 3 OS=Homo sapiens GN=SRSF3 PE=1 SV=1	HUMAN	1
823	0	1.01	31.58	9.474	9.474	tr|A0A087X2D0|A0A087X2D0_HUMAN	Serine/arginine-rich-splicing factor 3 OS=Homo sapiens GN=SRSF3 PE=1 SV=1	HUMAN	1
824	1.01	1.01	13.64	13.64	13.64	tr|J3QR88|J3QR88_HUMAN	Pyrroline-5-carboxylate reductase 1, mitochondrial (Fragment) OS=Homo sapiens GN=PYCR1 PE=1 SV=1	HUMAN	1
824	0	1.01	10.91	10.91	10.91	tr|J3QLK9|J3QLK9_HUMAN	Pyrroline-5-carboxylate reductase 1, mitochondrial (Fragment) OS=Homo sapiens GN=PYCR1 PE=1 SV=1	HUMAN	1
824	0	1.01	8.295	8.295	8.295	tr|J3QL32|J3QL32_HUMAN	Pyrroline-5-carboxylate reductase 1, isoform CRA_a OS=Homo sapiens GN=PYCR1 PE=1 SV=1	HUMAN	1
824	0	1.01	8	8	8	tr|J3QL24|J3QL24_HUMAN	Pyrroline-5-carboxylate reductase 1, mitochondrial (Fragment) OS=Homo sapiens GN=PYCR1 PE=1 SV=1	HUMAN	1
824	0	1.01	10.4	10.4	10.4	tr|J3QL23|J3QL23_HUMAN	Pyrroline-5-carboxylate reductase 1, mitochondrial (Fragment) OS=Homo sapiens GN=PYCR1 PE=1 SV=1	HUMAN	1
824	0	1.01	7.438	7.438	7.438	tr|J3QKT4|J3QKT4_HUMAN	Pyrroline-5-carboxylate reductase (Fragment) OS=Homo sapiens GN=PYCR1 PE=1 SV=1	HUMAN	1
824	0	1.01	7.115	7.115	7.115	tr|J3KQ22|J3KQ22_HUMAN	Pyrroline-5-carboxylate reductase (Fragment) OS=Homo sapiens GN=PYCR1 PE=1 SV=1	HUMAN	1
824	0	1.01	6.25	6.25	6.25	tr|E2QRB3|E2QRB3_HUMAN	Pyrroline-5-carboxylate reductase 1, isoform CRA_c OS=Homo sapiens GN=PYCR1 PE=1 SV=2	HUMAN	1
824	0	1.01	5.643	5.643	5.643	sp|P32322|P5CR1_HUMAN	Pyrroline-5-carboxylate reductase 1, mitochondrial OS=Homo sapiens GN=PYCR1 PE=1 SV=2	HUMAN	1
825	0.99	0.99	15.21	9.021	6.701	sp|Q9H488|OFUT1_HUMAN	GDP-fucose protein O-fucosyltransferase 1 OS=Homo sapiens GN=POFUT1 PE=1 SV=1	HUMAN	2
826	0.99	0.99	24.18	7.843	7.843	sp|Q9BPX5|ARP5L_HUMAN	Actin-related protein 2/3 complex subunit 5-like protein OS=Homo sapiens GN=ARPC5L PE=1 SV=1	HUMAN	1
827	0.99	0.99	9.422	9.422	4.559	sp|O00151|PDLI1_HUMAN	PDZ and LIM domain protein 1 OS=Homo sapiens GN=PDLIM1 PE=1 SV=4	HUMAN	1
828	0.98	1.3	10.38	8.077	5.385	tr|K7ERG9|K7ERG9_HUMAN	Complement factor D OS=Homo sapiens GN=CFD PE=1 SV=1	HUMAN	1
828	0	1.3	10.67	8.3	5.534	sp|P00746|CFAD_HUMAN	Complement factor D OS=Homo sapiens GN=CFD PE=1 SV=5	HUMAN	1
829	0.97	0.97	44.62	18.46	13.85	sp|P62244|RS15A_HUMAN	40S ribosomal protein S15a OS=Homo sapiens GN=RPS15A PE=1 SV=2	HUMAN	2
829	0	0.97	38	24	18	tr|I3L3P7|I3L3P7_HUMAN	40S ribosomal protein S15a OS=Homo sapiens GN=RPS15A PE=1 SV=1	HUMAN	2
830	0.97	0.97	13.78	3.205	3.205	sp|Q96QR8|PURB_HUMAN	Transcriptional activator protein Pur-beta OS=Homo sapiens GN=PURB PE=1 SV=3	HUMAN	1
831	0.96	0.96	5.089	1.651	1.651	sp|O75112|LDB3_HUMAN	LIM domain-binding protein 3 OS=Homo sapiens GN=LDB3 PE=1 SV=2	HUMAN	1
832	0.95	0.99	18.68	14.29	11.54	tr|A0A087WXS0|A0A087WXS0_HUMAN	Troponin I, fast skeletal muscle OS=Homo sapiens GN=TNNI2 PE=1 SV=1	HUMAN	2
832	0	0.99	18.68	14.29	11.54	sp|P48788|TNNI2_HUMAN	Troponin I, fast skeletal muscle OS=Homo sapiens GN=TNNI2 PE=1 SV=2	HUMAN	2
833	0.94	0.94	10.91	3.692	3.692	RRRRRsp|P35527|K1C9_HUMAN	REVERSED Keratin, type I cytoskeletal 9 OS=Homo sapiens GN=KRT9 PE=1 SV=3	HUMAN	1
833	0	0.94	14.87	5.897	5.897	RRRRRtr|K7EQQ3|K7EQQ3_HUMAN	REVERSED Keratin, type I cytoskeletal 9 OS=Homo sapiens GN=KRT9 PE=1 SV=1	HUMAN	1
834	0.93	1.62	17.14	9.207	4.859	tr|F8VZY9|F8VZY9_HUMAN	Keratin, type I cytoskeletal 18 OS=Homo sapiens GN=KRT18 PE=1 SV=1	HUMAN	2
834	0	1.62	15.58	8.372	4.419	sp|P05783|K1C18_HUMAN	Keratin, type I cytoskeletal 18 OS=Homo sapiens GN=KRT18 PE=1 SV=2	HUMAN	2
835	0.93	0.93	24.92	8.511	8.511	sp|P43235|CATK_HUMAN	Cathepsin K OS=Homo sapiens GN=CTSK PE=1 SV=1	HUMAN	2
836	0.93	0.93	7.384	2.743	2.743	sp|P48637|GSHB_HUMAN	Glutathione synthetase OS=Homo sapiens GN=GSS PE=1 SV=1	HUMAN	1
837	0.91	0.91	8.989	8.989	8.989	sp|Q8WW12|PCNP_HUMAN	PEST proteolytic signal-containing nuclear protein OS=Homo sapiens GN=PCNP PE=1 SV=2	HUMAN	1
838	0.9	0.9	20	4.889	4.889	sp|P08579|RU2B_HUMAN	U2 small nuclear ribonucleoprotein B'' OS=Homo sapiens GN=SNRPB2 PE=1 SV=1	HUMAN	1
839	0.9	0.9	9.113	3.202	3.202	sp|P62195|PRS8_HUMAN	26S protease regulatory subunit 8 OS=Homo sapiens GN=PSMC5 PE=1 SV=1	HUMAN	1
839	0	0.9	4.943	4.943	4.943	tr|J3QQM1|J3QQM1_HUMAN	26S protease regulatory subunit 8 (Fragment) OS=Homo sapiens GN=PSMC5 PE=1 SV=1	HUMAN	1
840	0.89	0.95	9.558	4.739	0.8689	tr|B4E1Z4|B4E1Z4_HUMAN	Uncharacterized protein OS=Homo sapiens PE=2 SV=1	HUMAN	1
840	0	0.95	9.596	4.126	0.9865	tr|E7ETN3|E7ETN3_HUMAN	Uncharacterized protein OS=Homo sapiens PE=3 SV=1	HUMAN	1
840	0	0.93	14.14	7.853	1.44	sp|P00751|CFAB_HUMAN	Complement factor B OS=Homo sapiens GN=CFB PE=1 SV=2	HUMAN	1
841	0.89	0.89	11.54	7.051	7.051	tr|A0A087WU32|A0A087WU32_HUMAN	Caspase-3 OS=Homo sapiens GN=CASP3 PE=1 SV=1	HUMAN	1
841	0	0.89	9.402	9.402	9.402	tr|C9JXR7|C9JXR7_HUMAN	Caspase-3 (Fragment) OS=Homo sapiens GN=CASP3 PE=1 SV=2	HUMAN	1
841	0	0.89	6.044	6.044	6.044	tr|A8MVM1|A8MVM1_HUMAN	Caspase-3 OS=Homo sapiens GN=CASP3 PE=1 SV=2	HUMAN	1
841	0	0.89	3.971	3.971	3.971	sp|P42574|CASP3_HUMAN	Caspase-3 OS=Homo sapiens GN=CASP3 PE=1 SV=2	HUMAN	1
842	0.88	4.36	15.11	8.273	3.597	sp|P17987|TCPA_HUMAN	T-complex protein 1 subunit alpha OS=Homo sapiens GN=TCP1 PE=1 SV=1	HUMAN	3
842	0	4.35	13.86	10.62	4.619	tr|E7ERF2|E7ERF2_HUMAN	T-complex protein 1 subunit alpha OS=Homo sapiens GN=TCP1 PE=1 SV=1	HUMAN	3
842	0	2.7	30.77	27.47	16.48	tr|F5H726|F5H726_HUMAN	T-complex protein 1 subunit alpha (Fragment) OS=Homo sapiens GN=TCP1 PE=1 SV=1	HUMAN	2
842	0	2.7	25.23	22.52	13.51	tr|F5H676|F5H676_HUMAN	T-complex protein 1 subunit alpha (Fragment) OS=Homo sapiens GN=TCP1 PE=1 SV=1	HUMAN	2
842	0	2.7	20.59	18.38	11.03	tr|F5H136|F5H136_HUMAN	T-complex protein 1 subunit alpha (Fragment) OS=Homo sapiens GN=TCP1 PE=1 SV=1	HUMAN	2
842	0	0.88	34	31	10	tr|F5GZI8|F5GZI8_HUMAN	T-complex protein 1 subunit alpha OS=Homo sapiens GN=TCP1 PE=1 SV=1	HUMAN	1
843	0.87	2.24	16.14	9.157	3.855	sp|Q9UKZ9|PCOC2_HUMAN	Procollagen C-endopeptidase enhancer 2 OS=Homo sapiens GN=PCOLCE2 PE=1 SV=1	HUMAN	2
844	0.87	0.92	2.752	2.752	1.606	sp|O43929|ORC4_HUMAN	Origin recognition complex subunit 4 OS=Homo sapiens GN=ORC4 PE=1 SV=2	HUMAN	1
844	0	0.87	7.097	1.129	1.129	sp|Q96NJ5|KLH32_HUMAN	Kelch-like protein 32 OS=Homo sapiens GN=KLHL32 PE=2 SV=2	HUMAN	1
844	0	0.87	14.77	3.977	3.977	tr|Q5THS9|Q5THS9_HUMAN	Kelch-like protein 32 (Fragment) OS=Homo sapiens GN=KLHL32 PE=4 SV=1	HUMAN	1
844	0	0.87	4.828	4.828	4.828	tr|Q53SE3|Q53SE3_HUMAN	Origin recognition complex subunit 4 (Fragment) OS=Homo sapiens GN=ORC4L PE=1 SV=1	HUMAN	1
844	0	0.87	5.512	5.512	5.512	tr|C9JGH7|C9JGH7_HUMAN	Origin recognition complex subunit 4 (Fragment) OS=Homo sapiens GN=ORC4 PE=1 SV=1	HUMAN	1
844	0	0.87	5.469	5.469	5.469	tr|C9J2X8|C9J2X8_HUMAN	Origin recognition complex subunit 4 (Fragment) OS=Homo sapiens GN=ORC4 PE=1 SV=1	HUMAN	1
845	0.86	0.88	11.59	2.675	2.675	tr|E9PCH5|E9PCH5_HUMAN	Calpastatin OS=Homo sapiens GN=CAST PE=1 SV=1	HUMAN	1
845	0	0.88	11.26	2.597	2.597	tr|E7EVY3|E7EVY3_HUMAN	Calpastatin OS=Homo sapiens GN=CAST PE=1 SV=1	HUMAN	1
845	0	0.88	12.15	2.804	2.804	tr|E7ES10|E7ES10_HUMAN	Calpastatin (Fragment) OS=Homo sapiens GN=CAST PE=1 SV=1	HUMAN	1
845	0	0.88	11.24	2.594	2.594	tr|B7Z574|B7Z574_HUMAN	Calpastatin OS=Homo sapiens GN=CAST PE=1 SV=1	HUMAN	1
845	0	0.88	11.02	2.542	2.542	sp|P20810|ICAL_HUMAN	Calpastatin OS=Homo sapiens GN=CAST PE=1 SV=4	HUMAN	1
845	0	0.86	15.27	4.58	4.58	tr|F8W7E0|F8W7E0_HUMAN	Calpastatin (Fragment) OS=Homo sapiens GN=CAST PE=1 SV=1	HUMAN	1
845	0	0.85	9.967	5.98	5.98	tr|H0YA91|H0YA91_HUMAN	Calpastatin (Fragment) OS=Homo sapiens GN=CAST PE=1 SV=1	HUMAN	1
845	0	0.84	6.25	6.25	6.25	tr|H0Y944|H0Y944_HUMAN	Calpastatin (Fragment) OS=Homo sapiens GN=CAST PE=1 SV=1	HUMAN	1
845	0	0.84	5.921	5.921	5.921	tr|E9PSG1|E9PSG1_HUMAN	Calpastatin (Fragment) OS=Homo sapiens GN=CAST PE=1 SV=1	HUMAN	1
845	0	0.84	11.54	11.54	11.54	tr|E7EQK6|E7EQK6_HUMAN	Calpastatin (Fragment) OS=Homo sapiens GN=CAST PE=1 SV=1	HUMAN	1
846	0.86	0.86	10.57	1.057	1.057	sp|Q9HCU0|CD248_HUMAN	Endosialin OS=Homo sapiens GN=CD248 PE=1 SV=1	HUMAN	1
847	0.85	0.85	15.95	8.949	4.669	tr|Q5JXI8|Q5JXI8_HUMAN	Four and a half LIM domains protein 1 (Fragment) OS=Homo sapiens GN=FHL1 PE=1 SV=1	HUMAN	1
847	0	0.82	18.89	7.121	3.715	sp|Q13642|FHL1_HUMAN	Four and a half LIM domains protein 1 OS=Homo sapiens GN=FHL1 PE=1 SV=4	HUMAN	1
847	0	0.82	15.94	11.11	5.797	tr|Q5JXI3|Q5JXI3_HUMAN	Four and a half LIM domains protein 1 (Fragment) OS=Homo sapiens GN=FHL1 PE=1 SV=1	HUMAN	1
847	0	0.82	15.71	10.95	5.714	tr|Q5JXI2|Q5JXI2_HUMAN	Four and a half LIM domains protein 1 OS=Homo sapiens GN=FHL1 PE=1 SV=1	HUMAN	1
847	0	0.82	16.18	11.27	5.882	tr|Q5JXH8|Q5JXH8_HUMAN	Four and a half LIM domains protein 1 (Fragment) OS=Homo sapiens GN=FHL1 PE=1 SV=1	HUMAN	1
847	0	0.82	16.1	11.22	5.854	tr|Q5JXH7|Q5JXH7_HUMAN	Four and a half LIM domains protein 1 (Fragment) OS=Homo sapiens GN=FHL1 PE=1 SV=1	HUMAN	1
847	0	0.82	14.84	14.84	7.742	tr|Q5JXH9|Q5JXH9_HUMAN	Four and a half LIM domains protein 1 (Fragment) OS=Homo sapiens GN=FHL1 PE=1 SV=1	HUMAN	1
847	0	0.79	8.511	8.511	8.511	tr|Q5JXI0|Q5JXI0_HUMAN	Four and a half LIM domains protein 1 (Fragment) OS=Homo sapiens GN=FHL1 PE=1 SV=1	HUMAN	1
848	0.85	0.85	22.67	9.333	9.333	tr|H3BTL1|H3BTL1_HUMAN	Microtubule-associated protein 1 light chain 3 beta, isoform CRA_f OS=Homo sapiens GN=MAP1LC3B PE=3 SV=1	HUMAN	1
848	0	0.85	13.6	5.6	5.6	sp|Q9GZQ8|MLP3B_HUMAN	Microtubule-associated proteins 1A/1B light chain 3B OS=Homo sapiens GN=MAP1LC3B PE=1 SV=3	HUMAN	1
848	0	0.85	13.6	5.6	5.6	sp|A6NCE7|MP3B2_HUMAN	Microtubule-associated proteins 1A/1B light chain 3 beta 2 OS=Homo sapiens GN=MAP1LC3B2 PE=2 SV=1	HUMAN	1
848	0	0.84	5.785	5.785	5.785	sp|Q9H492|MLP3A_HUMAN	Microtubule-associated proteins 1A/1B light chain 3A OS=Homo sapiens GN=MAP1LC3A PE=1 SV=2	HUMAN	1
849	0.83	0.83	5.676	5.676	5.676	sp|Q9UNZ2|NSF1C_HUMAN	NSFL1 cofactor p47 OS=Homo sapiens GN=NSFL1C PE=1 SV=2	HUMAN	2
850	0.82	7.2	35.89	21.37	16.44	sp|P13746|1A11_HUMAN	HLA class I histocompatibility antigen, A-11 alpha chain OS=Homo sapiens GN=HLA-A PE=1 SV=1	HUMAN	5
850	0	7.2	39.46	26.09	20.07	tr|Q5SRN7|Q5SRN7_HUMAN	HLA class I histocompatibility antigen, A-68 alpha chain OS=Homo sapiens GN=HLA-A PE=1 SV=2	HUMAN	5
850	0	7.2	31.81	21.02	16.17	tr|Q5SRN5|Q5SRN5_HUMAN	HLA class I histocompatibility antigen, A-68 alpha chain OS=Homo sapiens GN=HLA-A PE=1 SV=2	HUMAN	5
850	0	7.2	33.15	21.91	16.85	tr|A7MAP4|A7MAP4_HUMAN	HLA class I histocompatibility antigen, A-68 alpha chain OS=Homo sapiens GN=HLA-A PE=1 SV=1	HUMAN	5
850	0	7.2	32.33	21.37	16.44	sp|P04439|1A03_HUMAN	HLA class I histocompatibility antigen, A-3 alpha chain OS=Homo sapiens GN=HLA-A PE=1 SV=2	HUMAN	5
850	0	7.2	21.37	21.37	16.44	sp|P16188|1A30_HUMAN	HLA class I histocompatibility antigen, A-30 alpha chain OS=Homo sapiens GN=HLA-A PE=1 SV=2	HUMAN	5
850	0	5.48	23.01	23.01	16.44	sp|P10316|1A69_HUMAN	HLA class I histocompatibility antigen, A-69 alpha chain OS=Homo sapiens GN=HLA-A PE=1 SV=2	HUMAN	4
850	0	5.48	23.01	23.01	16.44	sp|P01892|1A02_HUMAN	HLA class I histocompatibility antigen, A-2 alpha chain OS=Homo sapiens GN=HLA-A PE=1 SV=1	HUMAN	4
850	0	5.26	22.74	19.45	12.88	sp|P30459|1A74_HUMAN	HLA class I histocompatibility antigen, A-74 alpha chain OS=Homo sapiens GN=HLA-A PE=1 SV=1	HUMAN	3
850	0	5.26	20.82	19.45	12.88	sp|P16189|1A31_HUMAN	HLA class I histocompatibility antigen, A-31 alpha chain OS=Homo sapiens GN=HLA-A PE=1 SV=2	HUMAN	3
850	0	5.22	20.82	16.44	12.88	sp|P16190|1A33_HUMAN	HLA class I histocompatibility antigen, A-33 alpha chain OS=Homo sapiens GN=HLA-A PE=1 SV=3	HUMAN	3
850	0	5.09	21.37	17.81	12.88	sp|P30457|1A66_HUMAN	HLA class I histocompatibility antigen, A-66 alpha chain OS=Homo sapiens GN=HLA-A PE=1 SV=1	HUMAN	3
850	0	5.09	19.73	17.81	12.88	sp|P30453|1A34_HUMAN	HLA class I histocompatibility antigen, A-34 alpha chain OS=Homo sapiens GN=HLA-A PE=1 SV=1	HUMAN	3
850	0	5.09	17.81	17.81	12.88	sp|P01891|1A68_HUMAN	HLA class I histocompatibility antigen, A-68 alpha chain OS=Homo sapiens GN=HLA-A PE=1 SV=4	HUMAN	3
851	0.82	0.82	5.285	1.626	1.626	sp|P11166|GTR1_HUMAN	Solute carrier family 2, facilitated glucose transporter member 1 OS=Homo sapiens GN=SLC2A1 PE=1 SV=2	HUMAN	1
851	0	0.82	6.827	3.213	3.213	tr|C9JIM8|C9JIM8_HUMAN	Solute carrier family 2, facilitated glucose transporter member 1 (Fragment) OS=Homo sapiens GN=SLC2A1 PE=1 SV=4	HUMAN	1
852	0.82	0.82	3.483	3.483	3.483	sp|Q9NTU7|CBLN4_HUMAN	Cerebellin-4 OS=Homo sapiens GN=CBLN4 PE=1 SV=1	HUMAN	1
853	0.81	2.35	44.19	33.72	22.67	sp|P24844|MYL9_HUMAN	Myosin regulatory light polypeptide 9 OS=Homo sapiens GN=MYL9 PE=1 SV=4	HUMAN	5
854	0.8	0.8	9.674	2.25	1.575	sp|P21399|ACOC_HUMAN	Cytoplasmic aconitate hydratase OS=Homo sapiens GN=ACO1 PE=1 SV=3	HUMAN	1
855	0.79	0.85	8.071	1.892	1.261	sp|Q8IXB1|DJC10_HUMAN	DnaJ homolog subfamily C member 10 OS=Homo sapiens GN=DNAJC10 PE=1 SV=2	HUMAN	1
856	0.79	0.82	35.71	8.791	6.044	sp|P55145|MANF_HUMAN	Mesencephalic astrocyte-derived neurotrophic factor OS=Homo sapiens GN=MANF PE=1 SV=3	HUMAN	1
857	0.78	0.8	14.55	3.002	3.002	sp|P35998|PRS7_HUMAN	26S protease regulatory subunit 7 OS=Homo sapiens GN=PSMC2 PE=1 SV=3	HUMAN	1
858	0.78	0.78	15.69	10.15	3.077	sp|P18065|IBP2_HUMAN	Insulin-like growth factor-binding protein 2 OS=Homo sapiens GN=IGFBP2 PE=1 SV=2	HUMAN	1
858	0	0.78	25.41	18.23	5.525	tr|C9JMY1|C9JMY1_HUMAN	Insulin-like growth factor-binding protein 2 OS=Homo sapiens GN=IGFBP2 PE=1 SV=1	HUMAN	1
859	0.78	0.78	33.9	14.41	8.475	tr|M0QZC5|M0QZC5_HUMAN	40S ribosomal protein S11 OS=Homo sapiens GN=RPS11 PE=1 SV=1	HUMAN	1
859	0	0.78	25.32	10.76	6.329	sp|P62280|RS11_HUMAN	40S ribosomal protein S11 OS=Homo sapiens GN=RPS11 PE=1 SV=3	HUMAN	1
860	0.78	0.78	5.538	5.538	5.538	sp|Q13347|EIF3I_HUMAN	Eukaryotic translation initiation factor 3 subunit I OS=Homo sapiens GN=EIF3I PE=1 SV=1	HUMAN	2
861	0.78	0.78	12.17	12.17	12.17	sp|P01116|RASK_HUMAN	GTPase KRas OS=Homo sapiens GN=KRAS PE=1 SV=1	HUMAN	2
861	0	0.78	12.17	12.17	12.17	sp|P01111|RASN_HUMAN	GTPase NRas OS=Homo sapiens GN=NRAS PE=1 SV=1	HUMAN	2
862	0.77	0.85	14.43	14.43	14.43	tr|H0YJT1|H0YJT1_HUMAN	26S protease regulatory subunit 10B OS=Homo sapiens GN=PSMC6 PE=1 SV=2	HUMAN	1
862	0	0.85	20	20	20	tr|H0YJE9|H0YJE9_HUMAN	26S protease regulatory subunit 10B OS=Homo sapiens GN=PSMC6 PE=1 SV=2	HUMAN	1
862	0	0.85	5.344	5.344	5.344	tr|H0YJC0|H0YJC0_HUMAN	26S protease regulatory subunit 10B (Fragment) OS=Homo sapiens GN=PSMC6 PE=1 SV=1	HUMAN	1
862	0	0.85	3.474	3.474	3.474	tr|A0A087X2I1|A0A087X2I1_HUMAN	26S protease regulatory subunit 10B OS=Homo sapiens GN=PSMC6 PE=1 SV=1	HUMAN	1
862	0	0.85	3.599	3.599	3.599	sp|P62333|PRS10_HUMAN	26S protease regulatory subunit 10B OS=Homo sapiens GN=PSMC6 PE=1 SV=1	HUMAN	1
863	0.77	0.77	7.365	1.964	0.982	sp|O94955|RHBT3_HUMAN	Rho-related BTB domain-containing protein 3 OS=Homo sapiens GN=RHOBTB3 PE=1 SV=2	HUMAN	1
863	0.02	0.76	15.76	5.419	3.448	sp|P05154|IPSP_HUMAN	Plasma serine protease inhibitor OS=Homo sapiens GN=SERPINA5 PE=1 SV=3	HUMAN	3
863	0	2.14	15.61	3.276	1.156	RRRRRsp|Q6UWH4|F198B_HUMAN	REVERSED Protein FAM198B OS=Homo sapiens GN=FAM198B PE=2 SV=1	HUMAN	1
863	0	1.28	2.744	1.756	1.207	RRRRRsp|Q9Y2U8|MAN1_HUMAN	REVERSED Inner nuclear membrane protein Man1 OS=Homo sapiens GN=LEMD3 PE=1 SV=2	HUMAN	2
863	0	1.27	4.669	2.14	0.9728	sp|Q9ULR3|PPM1H_HUMAN	Protein phosphatase 1H OS=Homo sapiens GN=PPM1H PE=1 SV=2	HUMAN	1
863	0	0.77	14.46	4.959	2.479	tr|D6RC79|D6RC79_HUMAN	Rho-related BTB domain-containing protein 3 OS=Homo sapiens GN=RHOBTB3 PE=1 SV=1	HUMAN	1
863	0	0.76	6.977	6.977	3.488	tr|H0Y9R7|H0Y9R7_HUMAN	Rho-related BTB domain-containing protein 3 (Fragment) OS=Homo sapiens GN=RHOBTB3 PE=1 SV=1	HUMAN	1
863	0	0.73	16.94	4.651	1.993	tr|G3V5Q9|G3V5Q9_HUMAN	Plasma serine protease inhibitor (Fragment) OS=Homo sapiens GN=SERPINA5 PE=1 SV=1	HUMAN	1
863	0	0.73	22.08	6.061	2.597	tr|G3V2M1|G3V2M1_HUMAN	Plasma serine protease inhibitor (Fragment) OS=Homo sapiens GN=SERPINA5 PE=1 SV=1	HUMAN	1
863	0	0.73	9.402	5.128	5.128	tr|H0YA85|H0YA85_HUMAN	Rho-related BTB domain-containing protein 3 (Fragment) OS=Homo sapiens GN=RHOBTB3 PE=1 SV=1	HUMAN	1
863	0	0.73	3.179	1.734	1.734	RRRRRtr|G3V5T9|G3V5T9_HUMAN	REVERSED Cyclin-dependent kinase 2 OS=Homo sapiens GN=CDK2 PE=1 SV=1	HUMAN	1
863	0	0.73	5.371	1.535	1.535	RRRRRsp|Q8N6V9|TEX9_HUMAN	REVERSED Testis-expressed sequence 9 protein OS=Homo sapiens GN=TEX9 PE=2 SV=1	HUMAN	1
863	0	0.73	3.691	2.013	2.013	RRRRRsp|P24941|CDK2_HUMAN	REVERSED Cyclin-dependent kinase 2 OS=Homo sapiens GN=CDK2 PE=1 SV=2	HUMAN	1
863	0	0.73	2.5	2.5	2.5	sp|P30711|GSTT1_HUMAN	Glutathione S-transferase theta-1 OS=Homo sapiens GN=GSTT1 PE=1 SV=4	HUMAN	1
863	0	0.73	1.84	1.84	1.84	RRRRRsp|Q00534|CDK6_HUMAN	REVERSED Cyclin-dependent kinase 6 OS=Homo sapiens GN=CDK6 PE=1 SV=1	HUMAN	1
863	0	0.51	3.925	0.2287	0.2287	RRRRRsp|A6H8Y1|BDP1_HUMAN	REVERSED Transcription factor TFIIIB component B'' homolog OS=Homo sapiens GN=BDP1 PE=1 SV=3	HUMAN	1
863	0	0.1	7.53	4.217	0	RRRRRsp|Q8IZU1|FAM9A_HUMAN	REVERSED Protein FAM9A OS=Homo sapiens GN=FAM9A PE=1 SV=1	HUMAN	1
863	0	0.08	3.226	3.226	0	RRRRRsp|Q8IZU0|FAM9B_HUMAN	REVERSED Protein FAM9B OS=Homo sapiens GN=FAM9B PE=2 SV=1	HUMAN	1
863	0	0.05	4.075	0.6215	0	RRRRRtr|A0A087WTM7|A0A087WTM7_HUMAN	REVERSED Apolipoprotein B-100 OS=Homo sapiens GN=APOB PE=1 SV=1	HUMAN	0
863	0	0.05	4.011	0.5917	0	RRRRRsp|P04114|APOB_HUMAN	REVERSED Apolipoprotein B-100 OS=Homo sapiens GN=APOB PE=1 SV=2	HUMAN	0
864	0.77	0.77	7.57	2.789	2.789	tr|J3KT14|J3KT14_HUMAN	THO complex subunit 1 OS=Homo sapiens GN=THOC1 PE=1 SV=1	HUMAN	1
865	0.77	0.77	6.977	3.876	3.876	tr|H3BPQ4|H3BPQ4_HUMAN	Hydroxyacylglutathione hydrolase, mitochondrial OS=Homo sapiens GN=HAGH PE=1 SV=1	HUMAN	1
865	0	0.77	4.184	4.184	4.184	tr|H3BPK3|H3BPK3_HUMAN	Hydroxyacylglutathione hydrolase, mitochondrial (Fragment) OS=Homo sapiens GN=HAGH PE=1 SV=1	HUMAN	1
865	0	0.77	3.247	3.247	3.247	sp|Q16775|GLO2_HUMAN	Hydroxyacylglutathione hydrolase, mitochondrial OS=Homo sapiens GN=HAGH PE=1 SV=2	HUMAN	1
866	0.75	0.75	8.149	1.698	1.698	sp|Q8WVV4|POF1B_HUMAN	Protein POF1B OS=Homo sapiens GN=POF1B PE=1 SV=3	HUMAN	1
867	0.75	0.75	10.71	5.011	3.417	sp|Q07960|RHG01_HUMAN	Rho GTPase-activating protein 1 OS=Homo sapiens GN=ARHGAP1 PE=1 SV=1	HUMAN	1
867	0	0.75	6.587	4.491	4.491	tr|H0YE29|H0YE29_HUMAN	Rho GTPase-activating protein 1 (Fragment) OS=Homo sapiens GN=ARHGAP1 PE=1 SV=1	HUMAN	1
868	0.75	0.75	18.45	12.62	12.62	sp|P20290|BTF3_HUMAN	Transcription factor BTF3 OS=Homo sapiens GN=BTF3 PE=1 SV=1	HUMAN	2
868	0	0.75	30.23	30.23	30.23	tr|H0Y9Y1|H0Y9Y1_HUMAN	Transcription factor BTF3 (Fragment) OS=Homo sapiens GN=BTF3 PE=1 SV=2	HUMAN	2
868	0	0.75	23.85	23.85	23.85	tr|D6RDG3|D6RDG3_HUMAN	Transcription factor BTF3 (Fragment) OS=Homo sapiens GN=BTF3 PE=1 SV=3	HUMAN	2
869	0.74	11.3	27.35	26.8	22.65	tr|E7EQG2|E7EQG2_HUMAN	Eukaryotic initiation factor 4A-II OS=Homo sapiens GN=EIF4A2 PE=1 SV=1	HUMAN	7
869	0	11.3	24.32	23.83	20.15	sp|Q14240|IF4A2_HUMAN	Eukaryotic initiation factor 4A-II OS=Homo sapiens GN=EIF4A2 PE=1 SV=2	HUMAN	7
870	0.73	5.46	52.38	47.62	35.71	sp|Q16778|H2B2E_HUMAN	Histone H2B type 2-E OS=Homo sapiens GN=HIST2H2BE PE=1 SV=3	HUMAN	8
870	0	5.46	52.38	47.62	35.71	sp|P33778|H2B1B_HUMAN	Histone H2B type 1-B OS=Homo sapiens GN=HIST1H2BB PE=1 SV=2	HUMAN	8
870	0	5.46	52.38	47.62	35.71	sp|P23527|H2B1O_HUMAN	Histone H2B type 1-O OS=Homo sapiens GN=HIST1H2BO PE=1 SV=3	HUMAN	8
870	0	5.46	52.38	47.62	35.71	sp|P06899|H2B1J_HUMAN	Histone H2B type 1-J OS=Homo sapiens GN=HIST1H2BJ PE=1 SV=3	HUMAN	8
870	0	5.39	42.86	35.71	35.71	sp|Q8N257|H2B3B_HUMAN	Histone H2B type 3-B OS=Homo sapiens GN=HIST3H2BB PE=1 SV=3	HUMAN	8
870	0	0.75	18.9	15.24	6.098	sp|Q6DRA6|H2B2D_HUMAN	Putative histone H2B type 2-D OS=Homo sapiens GN=HIST2H2BD PE=5 SV=3	HUMAN	1
870	0	0.75	16.06	12.95	5.181	sp|Q6DN03|H2B2C_HUMAN	Putative histone H2B type 2-C OS=Homo sapiens GN=HIST2H2BC PE=5 SV=3	HUMAN	1
871	0.73	0.73	14.05	8.378	0	tr|I3L0A0|I3L0A0_HUMAN	HCG2044781 OS=Homo sapiens GN=TMEM189-UBE2V1 PE=4 SV=1	HUMAN	0
871	0	0.73	35.37	21.09	0	sp|Q13404|UB2V1_HUMAN	Ubiquitin-conjugating enzyme E2 variant 1 OS=Homo sapiens GN=UBE2V1 PE=1 SV=2	HUMAN	0
872	0.73	0.73	20.26	8.158	2.895	sp|O75635|SPB7_HUMAN	Serpin B7 OS=Homo sapiens GN=SERPINB7 PE=1 SV=1	HUMAN	1
873	0.73	0.73	10.07	6.715	0	sp|P27797|CALR_HUMAN	Calreticulin OS=Homo sapiens GN=CALR PE=1 SV=1	HUMAN	0
874	0.72	0.77	4.861	2.604	0.6944	tr|J3KR24|J3KR24_HUMAN	Isoleucine--tRNA ligase, cytoplasmic OS=Homo sapiens GN=IARS PE=1 SV=1	HUMAN	1
874	0	0.77	4.509	2.415	0.6441	tr|A0A0A0MSX9|A0A0A0MSX9_HUMAN	Isoleucine--tRNA ligase, cytoplasmic OS=Homo sapiens GN=IARS PE=1 SV=1	HUMAN	1
874	0	0.77	4.437	2.377	0.6339	sp|P41252|SYIC_HUMAN	Isoleucine--tRNA ligase, cytoplasmic OS=Homo sapiens GN=IARS PE=1 SV=2	HUMAN	1
875	0.72	0.74	6.462	0.8762	0.8762	tr|A0A087X253|A0A087X253_HUMAN	AP complex subunit beta OS=Homo sapiens GN=AP2B1 PE=1 SV=1	HUMAN	1
875	0	0.74	6.297	0.8538	0.8538	sp|P63010|AP2B1_HUMAN	AP-2 complex subunit beta OS=Homo sapiens GN=AP2B1 PE=1 SV=1	HUMAN	1
876	0.72	0.72	32.26	19.35	11.83	sp|P05109|S10A8_HUMAN	Protein S100-A8 OS=Homo sapiens GN=S100A8 PE=1 SV=1	HUMAN	1
877	0.71	2.82	17.71	10.68	8.333	tr|G3V1Q4|G3V1Q4_HUMAN	Septin 7, isoform CRA_a OS=Homo sapiens GN=SEPT7 PE=1 SV=1	HUMAN	2
877	0	2.82	16.31	9.832	7.674	tr|E7ES33|E7ES33_HUMAN	Septin-7 OS=Homo sapiens GN=SEPT7 PE=1 SV=3	HUMAN	2
877	0	2.82	15.56	9.382	7.323	tr|E7EPK1|E7EPK1_HUMAN	Septin-7 OS=Homo sapiens GN=SEPT7 PE=1 SV=2	HUMAN	2
877	0	2.82	15.56	9.382	7.323	sp|Q16181|SEPT7_HUMAN	Septin-7 OS=Homo sapiens GN=SEPT7 PE=1 SV=2	HUMAN	2
877	0	2.8	17.16	8.579	8.579	tr|H0Y3Y4|H0Y3Y4_HUMAN	Septin-7 (Fragment) OS=Homo sapiens GN=SEPT7 PE=1 SV=1	HUMAN	2
878	0.71	0.71	6.838	6.838	2.564	tr|H0YN65|H0YN65_HUMAN	Carbohydrate sulfotransferase 14 OS=Homo sapiens GN=CHST14 PE=1 SV=1	HUMAN	1
878	0	0.71	6.383	6.383	2.394	sp|Q8NCH0|CHSTE_HUMAN	Carbohydrate sulfotransferase 14 OS=Homo sapiens GN=CHST14 PE=1 SV=2	HUMAN	1
879	0.71	0.71	8.848	1.852	1.852	sp|Q9UNF0|PACN2_HUMAN	Protein kinase C and casein kinase substrate in neurons protein 2 OS=Homo sapiens GN=PACSIN2 PE=1 SV=2	HUMAN	1
880	0.69	29.25	38.97	24.84	22.32	sp|Q05682|CALD1_HUMAN	Caldesmon OS=Homo sapiens GN=CALD1 PE=1 SV=3	HUMAN	17
880	0	29.25	45.6	35.37	31.78	tr|E7EX44|E7EX44_HUMAN	Caldesmon OS=Homo sapiens GN=CALD1 PE=1 SV=1	HUMAN	17
881	0.69	0.69	22.5	5	5	tr|F8VVL1|F8VVL1_HUMAN	Density-regulated protein OS=Homo sapiens GN=DENR PE=1 SV=1	HUMAN	1
881	0	0.69	18.18	4.04	4.04	sp|O43583|DENR_HUMAN	Density-regulated protein OS=Homo sapiens GN=DENR PE=1 SV=2	HUMAN	1
882	0.68	0.75	4.57	1.275	0.6376	tr|A0A087WXL6|A0A087WXL6_HUMAN	Vacuolar protein sorting 11 (Yeast), isoform CRA_a OS=Homo sapiens GN=VPS11 PE=1 SV=1	HUMAN	1
882	0	0.75	4.57	1.275	0.6376	sp|Q9H270|VPS11_HUMAN	Vacuolar protein sorting-associated protein 11 homolog OS=Homo sapiens GN=VPS11 PE=1 SV=1	HUMAN	1
882	0	0.74	4.082	1.289	0.6445	tr|B7Z879|B7Z879_HUMAN	Vacuolar protein sorting-associated protein 11 homolog OS=Homo sapiens GN=VPS11 PE=1 SV=1	HUMAN	1
882	0	0.72	3.083	2.119	1.156	RRRRRsp|Q8N4U5|T11L2_HUMAN	REVERSED T-complex protein 11-like protein 2 OS=Homo sapiens GN=TCP11L2 PE=2 SV=1	HUMAN	1
882	0	0.71	2.165	2.165	1.181	sp|Q96M60|F227B_HUMAN	Protein FAM227B OS=Homo sapiens GN=FAM227B PE=2 SV=2	HUMAN	1
882	0	0.68	6.25	0.9615	0.9615	RRRRRsp|Q14145|KEAP1_HUMAN	REVERSED Kelch-like ECH-associated protein 1 OS=Homo sapiens GN=KEAP1 PE=1 SV=2	HUMAN	1
882	0	0.68	3.867	3.315	3.315	tr|A0A087X2J4|A0A087X2J4_HUMAN	Vacuolar protein sorting-associated protein 11 homolog (Fragment) OS=Homo sapiens GN=VPS11 PE=1 SV=1	HUMAN	1
882	0	0.68	3.371	3.371	3.371	tr|H0YNN2|H0YNN2_HUMAN	Protein FAM227B OS=Homo sapiens GN=FAM227B PE=4 SV=1	HUMAN	1
882	0	0.68	12.77	12.77	12.77	tr|H0YMU4|H0YMU4_HUMAN	Protein FAM227B OS=Homo sapiens GN=FAM227B PE=4 SV=1	HUMAN	1
882	0	0.68	3.297	3.297	3.297	tr|H0YLX5|H0YLX5_HUMAN	Protein FAM227B (Fragment) OS=Homo sapiens GN=FAM227B PE=4 SV=1	HUMAN	1
882	0	0.68	3.614	3.614	3.614	tr|H0YK12|H0YK12_HUMAN	Protein FAM227B OS=Homo sapiens GN=FAM227B PE=4 SV=1	HUMAN	1
882	0	0.68	2.206	2.206	2.206	RRRRRtr|G3V1Z2|G3V1Z2_HUMAN	REVERSED T-complex 11 (Mouse) like 2, isoform CRA_c OS=Homo sapiens GN=TCP11L2 PE=1 SV=1	HUMAN	1
882	0	0.68	2.564	2.564	2.564	RRRRRtr|F8VRQ3|F8VRQ3_HUMAN	REVERSED T-complex protein 11-like protein 2 (Fragment) OS=Homo sapiens GN=TCP11L2 PE=1 SV=1	HUMAN	1
883	0.68	0.68	18.94	6.818	6.818	tr|S4R371|S4R371_HUMAN	Fatty acid-binding protein, heart (Fragment) OS=Homo sapiens GN=FABP3 PE=1 SV=1	HUMAN	1
883	0	0.68	18.8	6.767	6.767	sp|P05413|FABPH_HUMAN	Fatty acid-binding protein, heart OS=Homo sapiens GN=FABP3 PE=1 SV=4	HUMAN	1
884	0.68	0.68	9.249	3.757	3.757	sp|P31942|HNRH3_HUMAN	Heterogeneous nuclear ribonucleoprotein H3 OS=Homo sapiens GN=HNRNPH3 PE=1 SV=2	HUMAN	1
885	0.67	45.37	32.64	18.01	18.01	sp|P20908|CO5A1_HUMAN	Collagen alpha-1(V) chain OS=Homo sapiens GN=COL5A1 PE=1 SV=3	HUMAN	32
886	0.66	0.94	19.67	7.65	5.464	RRRRRsp|Q29960|1C16_HUMAN	REVERSED HLA class I histocompatibility antigen, Cw-16 alpha chain OS=Homo sapiens GN=HLA-C PE=1 SV=1	HUMAN	1
886	0.01	0.66	14.25	6.183	5.376	RRRRRtr|A2AEA2|A2AEA2_HUMAN	REVERSED HLA class I histocompatibility antigen, Cw-14 alpha chain OS=Homo sapiens GN=HLA-C PE=1 SV=2	HUMAN	1
886	0.01	0.66	16.92	7.077	6.154	RRRRRtr|A0A087WWL9|A0A087WWL9_HUMAN	REVERSED HLA class I histocompatibility antigen, Cw-14 alpha chain OS=Homo sapiens GN=HLA-C PE=1 SV=1	HUMAN	1
886	0.01	0.66	14.48	6.284	5.464	RRRRRsp|P10321|1C07_HUMAN	REVERSED HLA class I histocompatibility antigen, Cw-7 alpha chain OS=Homo sapiens GN=HLA-C PE=1 SV=3	HUMAN	1
886	0	0.94	19.67	7.65	5.464	RRRRRsp|P30505|1C08_HUMAN	REVERSED HLA class I histocompatibility antigen, Cw-8 alpha chain OS=Homo sapiens GN=HLA-C PE=1 SV=1	HUMAN	1
886	0	0.93	20.99	7.735	5.525	RRRRRsp|Q29718|1B82_HUMAN	REVERSED HLA class I histocompatibility antigen, B-82 alpha chain OS=Homo sapiens GN=HLA-B PE=1 SV=1	HUMAN	1
886	0	0.93	26.52	7.735	5.525	RRRRRsp|P01893|HLAH_HUMAN	REVERSED Putative HLA class I histocompatibility antigen, alpha chain H OS=Homo sapiens GN=HLA-H PE=5 SV=3	HUMAN	1
886	0	0.93	18.89	7.053	5.038	RRRRRtr|A2BF26|A2BF26_HUMAN	REVERSED HLA class I histocompatibility antigen, Cw-14 alpha chain OS=Homo sapiens GN=HLA-C PE=1 SV=1	HUMAN	1
886	0	0.93	20.49	7.65	5.464	RRRRRsp|Q9TNN7|1C05_HUMAN	REVERSED HLA class I histocompatibility antigen, Cw-5 alpha chain OS=Homo sapiens GN=HLA-C PE=1 SV=1	HUMAN	1
886	0	0.93	18.03	7.65	5.464	RRRRRsp|Q29963|1C06_HUMAN	REVERSED HLA class I histocompatibility antigen, Cw-6 alpha chain OS=Homo sapiens GN=HLA-C PE=1 SV=2	HUMAN	1
886	0	0.93	15.89	7.671	5.479	RRRRRsp|Q09160|1A80_HUMAN	REVERSED HLA class I histocompatibility antigen, A-80 alpha chain OS=Homo sapiens GN=HLA-A PE=1 SV=1	HUMAN	1
886	0	0.93	15.75	7.735	5.525	RRRRRsp|P30495|1B56_HUMAN	REVERSED HLA class I histocompatibility antigen, B-56 alpha chain OS=Homo sapiens GN=HLA-B PE=1 SV=1	HUMAN	1
886	0	0.93	15.75	7.735	5.525	RRRRRsp|P30493|1B55_HUMAN	REVERSED HLA class I histocompatibility antigen, B-55 alpha chain OS=Homo sapiens GN=HLA-B PE=1 SV=1	HUMAN	1
886	0	0.93	15.75	7.735	5.525	RRRRRsp|P30492|1B54_HUMAN	REVERSED HLA class I histocompatibility antigen, B-54 alpha chain OS=Homo sapiens GN=HLA-B PE=1 SV=1	HUMAN	1
886	0	0.93	17.13	7.735	5.525	RRRRRsp|P18463|1B37_HUMAN	REVERSED HLA class I histocompatibility antigen, B-37 alpha chain OS=Homo sapiens GN=HLA-B PE=1 SV=1	HUMAN	1
886	0	0.93	16.71	7.671	5.479	RRRRRsp|P16190|1A33_HUMAN	REVERSED HLA class I histocompatibility antigen, A-33 alpha chain OS=Homo sapiens GN=HLA-A PE=1 SV=3	HUMAN	1
886	0	0.93	15.34	7.671	5.479	RRRRRsp|P10314|1A32_HUMAN	REVERSED HLA class I histocompatibility antigen, A-32 alpha chain OS=Homo sapiens GN=HLA-A PE=1 SV=2	HUMAN	1
886	0	0.93	14.09	7.735	5.525	RRRRRsp|Q29940|1B59_HUMAN	REVERSED HLA class I histocompatibility antigen, B-59 alpha chain OS=Homo sapiens GN=HLA-B PE=1 SV=1	HUMAN	1
886	0	0.93	16.94	7.65	5.464	RRRRRsp|Q07000|1C15_HUMAN	REVERSED HLA class I histocompatibility antigen, Cw-15 alpha chain OS=Homo sapiens GN=HLA-C PE=1 SV=1	HUMAN	1
886	0	0.93	9.589	7.671	5.479	RRRRRsp|P30512|1A29_HUMAN	REVERSED HLA class I histocompatibility antigen, A-29 alpha chain OS=Homo sapiens GN=HLA-A PE=1 SV=2	HUMAN	1
886	0	0.93	16.94	7.65	5.464	RRRRRsp|P30508|1C12_HUMAN	REVERSED HLA class I histocompatibility antigen, Cw-12 alpha chain OS=Homo sapiens GN=HLA-C PE=1 SV=2	HUMAN	1
886	0	0.93	16.94	7.65	5.464	RRRRRsp|P30501|1C02_HUMAN	REVERSED HLA class I histocompatibility antigen, Cw-2 alpha chain OS=Homo sapiens GN=HLA-C PE=1 SV=1	HUMAN	1
886	0	0.93	14.09	7.735	5.525	RRRRRsp|P30466|1B18_HUMAN	REVERSED HLA class I histocompatibility antigen, B-18 alpha chain OS=Homo sapiens GN=HLA-B PE=1 SV=1	HUMAN	1
886	0	0.93	13.15	7.671	5.479	RRRRRsp|P30459|1A74_HUMAN	REVERSED HLA class I histocompatibility antigen, A-74 alpha chain OS=Homo sapiens GN=HLA-A PE=1 SV=1	HUMAN	1
886	0	0.93	9.589	7.671	5.479	RRRRRsp|P30455|1A36_HUMAN	REVERSED HLA class I histocompatibility antigen, A-36 alpha chain OS=Homo sapiens GN=HLA-A PE=1 SV=1	HUMAN	1
886	0	0.93	9.589	7.671	5.479	RRRRRsp|P30443|1A01_HUMAN	REVERSED HLA class I histocompatibility antigen, A-1 alpha chain OS=Homo sapiens GN=HLA-A PE=1 SV=1	HUMAN	1
886	0	0.93	13.15	7.671	5.479	RRRRRsp|P16189|1A31_HUMAN	REVERSED HLA class I histocompatibility antigen, A-31 alpha chain OS=Homo sapiens GN=HLA-A PE=1 SV=2	HUMAN	1
886	0	0.93	17.26	7.671	5.479	RRRRRsp|P13746|1A11_HUMAN	REVERSED HLA class I histocompatibility antigen, A-11 alpha chain OS=Homo sapiens GN=HLA-A PE=1 SV=1	HUMAN	1
886	0	0.93	9.365	9.365	6.689	RRRRRtr|Q5SRN7|Q5SRN7_HUMAN	REVERSED HLA class I histocompatibility antigen, A-68 alpha chain OS=Homo sapiens GN=HLA-A PE=1 SV=2	HUMAN	1
886	0	0.93	7.547	7.547	5.391	RRRRRtr|Q5SRN5|Q5SRN5_HUMAN	REVERSED HLA class I histocompatibility antigen, A-68 alpha chain OS=Homo sapiens GN=HLA-A PE=1 SV=2	HUMAN	1
886	0	0.93	7.865	7.865	5.618	RRRRRtr|A7MAP4|A7MAP4_HUMAN	REVERSED HLA class I histocompatibility antigen, A-68 alpha chain OS=Homo sapiens GN=HLA-A PE=1 SV=1	HUMAN	1
886	0	0.93	7.735	7.735	5.525	RRRRRsp|Q04826|1B40_HUMAN	REVERSED HLA class I histocompatibility antigen, B-40 alpha chain OS=Homo sapiens GN=HLA-B PE=1 SV=1	HUMAN	1
886	0	0.93	7.735	7.735	5.525	RRRRRsp|P30485|1B47_HUMAN	REVERSED HLA class I histocompatibility antigen, B-47 alpha chain OS=Homo sapiens GN=HLA-B PE=1 SV=1	HUMAN	1
886	0	0.93	7.735	7.735	5.525	RRRRRsp|P30481|1B44_HUMAN	REVERSED HLA class I histocompatibility antigen, B-44 alpha chain OS=Homo sapiens GN=HLA-B PE=1 SV=1	HUMAN	1
886	0	0.93	7.735	7.735	5.525	RRRRRsp|P30461|1B13_HUMAN	REVERSED HLA class I histocompatibility antigen, B-13 alpha chain OS=Homo sapiens GN=HLA-B PE=1 SV=1	HUMAN	1
886	0	0.93	7.671	7.671	5.479	RRRRRsp|P16188|1A30_HUMAN	REVERSED HLA class I histocompatibility antigen, A-30 alpha chain OS=Homo sapiens GN=HLA-A PE=1 SV=2	HUMAN	1
886	0	0.93	7.671	7.671	5.479	RRRRRsp|P04439|1A03_HUMAN	REVERSED HLA class I histocompatibility antigen, A-3 alpha chain OS=Homo sapiens GN=HLA-A PE=1 SV=2	HUMAN	1
886	0	0.93	7.735	7.735	5.525	RRRRRsp|P03989|1B27_HUMAN	REVERSED HLA class I histocompatibility antigen, B-27 alpha chain OS=Homo sapiens GN=HLA-B PE=1 SV=2	HUMAN	1
886	0	0.68	15.07	7.671	5.479	RRRRRsp|P30456|1A43_HUMAN	REVERSED HLA class I histocompatibility antigen, A-43 alpha chain OS=Homo sapiens GN=HLA-A PE=1 SV=1	HUMAN	1
886	0	0.68	15.07	7.671	5.479	RRRRRsp|P30450|1A26_HUMAN	REVERSED HLA class I histocompatibility antigen, A-26 alpha chain OS=Homo sapiens GN=HLA-A PE=1 SV=2	HUMAN	1
886	0	0.68	15.34	7.671	5.479	RRRRRsp|P18462|1A25_HUMAN	REVERSED HLA class I histocompatibility antigen, A-25 alpha chain OS=Homo sapiens GN=HLA-A PE=1 SV=1	HUMAN	1
886	0	0.67	13.15	7.671	5.479	RRRRRsp|P30457|1A66_HUMAN	REVERSED HLA class I histocompatibility antigen, A-66 alpha chain OS=Homo sapiens GN=HLA-A PE=1 SV=1	HUMAN	1
886	0	0.67	13.15	7.671	5.479	RRRRRsp|P30453|1A34_HUMAN	REVERSED HLA class I histocompatibility antigen, A-34 alpha chain OS=Homo sapiens GN=HLA-A PE=1 SV=1	HUMAN	1
[truncated: 1,371 more rows]

## Sheet: BM MSC DOXO sample 150825
N	Unused	Total	%Cov	%Cov(50)	%Cov(95)	Accession	Name	Species	Peptides(95%)	Accession			Molecular Function	PANTHER ID
1	178.68	178.68	51.08	47.98	45.07	sp|P21333|FLNA_HUMAN	Filamin-A OS=Homo sapiens GN=FLNA PE=1 SV=4	HUMAN	111	sp	P21333	FLNA_HUMAN
2	160.18	160.18	54.27	52.26	45.39	sp|P02751|FINC_HUMAN	Fibronectin OS=Homo sapiens GN=FN1 PE=1 SV=4	HUMAN	248	sp	P02751	FINC_HUMAN
3	151.94	151.94	56.22	49.95	45.2	sp|P35579|MYH9_HUMAN	Myosin-9 OS=Homo sapiens GN=MYH9 PE=1 SV=4	HUMAN	98	sp	P35579	MYH9_HUMAN
4	137.95	137.95	41.49	34.34	28.33	sp|P12111|CO6A3_HUMAN	Collagen alpha-3(VI) chain OS=Homo sapiens GN=COL6A3 PE=1 SV=5	HUMAN	79	sp	P12111	CO6A3_HUMAN
5	111.51	126.84	44.81	36.55	32.11	sp|Q14315|FLNC_HUMAN	Filamin-C OS=Homo sapiens GN=FLNC PE=1 SV=3	HUMAN	64	sp	Q14315	FLNC_HUMAN
6	105.91	105.95	30.08	19.45	13.11	sp|Q15149|PLEC_HUMAN	Plectin OS=Homo sapiens GN=PLEC PE=1 SV=3	HUMAN	52	sp	Q15149	PLEC_HUMAN
7	94.05	94.85	88.84	85.84	84.33	sp|P08670|VIME_HUMAN	Vimentin OS=Homo sapiens GN=VIM PE=1 SV=4	HUMAN	84	sp	P08670	VIME_HUMAN
8	90.96	90.96	71.92	69.32	61.35	sp|P26038|MOES_HUMAN	Moesin OS=Homo sapiens GN=MSN PE=1 SV=3	HUMAN	57	sp	P26038	MOES_HUMAN
9	87.71	87.77	64.16	61.45	57.08	sp|P02545|LMNA_HUMAN	Prelamin-A/C OS=Homo sapiens GN=LMNA PE=1 SV=1	HUMAN	55	sp	P02545	LMNA_HUMAN
10	85.4	104.67	38.93	33.24	26.02	sp|O75369|FLNB_HUMAN	Filamin-B OS=Homo sapiens GN=FLNB PE=1 SV=2	HUMAN	56	sp	O75369	FLNB_HUMAN
11	79.51	79.51	64.57	59.3	53.25	sp|P12814|ACTN1_HUMAN	Alpha-actinin-1 OS=Homo sapiens GN=ACTN1 PE=1 SV=2	HUMAN	65	sp	P12814	ACTN1_HUMAN
12	78.06	78.06	59.79	58.26	53.06	sp|P11021|GRP78_HUMAN	78 kDa glucose-regulated protein OS=Homo sapiens GN=HSPA5 PE=1 SV=2	HUMAN	47	sp	P11021	GRP78_HUMAN
13	75.49	75.81	38.02	29.16	23.14	sp|Q9Y490|TLN1_HUMAN	Talin-1 OS=Homo sapiens GN=TLN1 PE=1 SV=3	HUMAN	40	sp	Q9Y490	TLN1_HUMAN
14	70.55	70.55	68.12	64.16	61.39	sp|P30101|PDIA3_HUMAN	Protein disulfide-isomerase A3 OS=Homo sapiens GN=PDIA3 PE=1 SV=4	HUMAN	43	sp	P30101	PDIA3_HUMAN
15	67.74	67.74	72.88	65.91	64.6	sp|P14618|KPYM_HUMAN	Pyruvate kinase PKM OS=Homo sapiens GN=PKM PE=1 SV=4	HUMAN	52	sp	P14618	KPYM_HUMAN
16	65.72	67.78	52.33	47.36	45.96	sp|P04264|K2C1_HUMAN	Keratin, type II cytoskeletal 1 OS=Homo sapiens GN=KRT1 PE=1 SV=6	HUMAN	39	sp	P04264	K2C1_HUMAN
17	64.79	64.79	76.4	72.57	66.37	sp|P07355|ANXA2_HUMAN	Annexin A2 OS=Homo sapiens GN=ANXA2 PE=1 SV=2	HUMAN	53	sp	P07355	ANXA2_HUMAN
18	64.5	70.73	65.79	57.89	54.49	sp|P11142|HSP7C_HUMAN	Heat shock cognate 71 kDa protein OS=Homo sapiens GN=HSPA8 PE=1 SV=1	HUMAN	53	sp	P11142	HSP7C_HUMAN
19	58.93	58.93	78.11	63.82	63.82	sp|P06733|ENOA_HUMAN	Alpha-enolase OS=Homo sapiens GN=ENO1 PE=1 SV=2	HUMAN	57	sp	P06733	ENOA_HUMAN
20	58.54	59.06	54.41	42.33	34.92	sp|P18206|VINC_HUMAN	Vinculin OS=Homo sapiens GN=VCL PE=1 SV=4	HUMAN	31	sp	P18206	VINC_HUMAN
21	54.8	54.8	74.13	74.13	72.8	sp|P63261|ACTG_HUMAN	Actin, cytoplasmic 2 OS=Homo sapiens GN=ACTG1 PE=1 SV=1	HUMAN	112	sp	P63261	ACTG_HUMAN
22	54.51	54.51	39.59	26.43	22.21	sp|P46940|IQGA1_HUMAN	Ras GTPase-activating-like protein IQGAP1 OS=Homo sapiens GN=IQGAP1 PE=1 SV=1	HUMAN	27	sp	P46940	IQGA1_HUMAN
23	53.32	53.32	59.93	51.54	46.92	sp|P13645|K1C10_HUMAN	Keratin, type I cytoskeletal 10 OS=Homo sapiens GN=KRT10 PE=1 SV=6	HUMAN	32	sp	P13645	K1C10_HUMAN
24	51.12	51.12	47.1	45.03	38.81	sp|P08238|HS90B_HUMAN	Heat shock protein HSP 90-beta OS=Homo sapiens GN=HSP90AB1 PE=1 SV=4	HUMAN	37	sp	P08238	HS90B_HUMAN
25	50.69	50.69	56.21	54.24	49.39	sp|P08253|MMP2_HUMAN	72 kDa type IV collagenase OS=Homo sapiens GN=MMP2 PE=1 SV=2	HUMAN	37	sp	P08253	MMP2_HUMAN
26	50.36	50.36	68.7	65.75	59.65	sp|P07237|PDIA1_HUMAN	Protein disulfide-isomerase OS=Homo sapiens GN=P4HB PE=1 SV=3	HUMAN	32	sp	P07237	PDIA1_HUMAN
27	49.07	59.29	57.1	52.26	47.89	sp|P08107|HSP71_HUMAN	Heat shock 70 kDa protein 1A/1B OS=Homo sapiens GN=HSPA1A PE=1 SV=5	HUMAN	38	sp	P08107	HSP71_HUMAN
28	46.72	46.72	64.4	48.87	48.87	sp|P10809|CH60_HUMAN	60 kDa heat shock protein, mitochondrial OS=Homo sapiens GN=HSPD1 PE=1 SV=2	HUMAN	31	sp	P10809	CH60_HUMAN
29	46.63	46.63	65.89	49.49	47.14	sp|Q15582|BGH3_HUMAN	Transforming growth factor-beta-induced protein ig-h3 OS=Homo sapiens GN=TGFBI PE=1 SV=1	HUMAN	35	sp	Q15582	BGH3_HUMAN
30	44.28	44.28	66.58	64.13	63.59	tr|J3KPS3|J3KPS3_HUMAN	Fructose-bisphosphate aldolase OS=Homo sapiens GN=ALDOA PE=1 SV=1	HUMAN	41	tr	J3KPS3	J3KPS3_HUMAN
31	43.56	43.56	61.32	56.34	52.33	sp|P29401|TKT_HUMAN	Transketolase OS=Homo sapiens GN=TKT PE=1 SV=3	HUMAN	35	sp	P29401	TKT_HUMAN
32	42.72	42.84	60.96	54.49	42.86	sp|Q07065|CKAP4_HUMAN	Cytoskeleton-associated protein 4 OS=Homo sapiens GN=CKAP4 PE=1 SV=2	HUMAN	20	sp	Q07065	CKAP4_HUMAN
33	42.02	42.02	57.51	55.4	55.4	tr|Q5JP53|Q5JP53_HUMAN	Tubulin beta chain OS=Homo sapiens GN=TUBB PE=1 SV=1	HUMAN	31	tr	Q5JP53	Q5JP53_HUMAN
34	41.61	41.61	72.18	60.48	52.42	sp|P67936|TPM4_HUMAN	Tropomyosin alpha-4 chain OS=Homo sapiens GN=TPM4 PE=1 SV=3	HUMAN	23	sp	P67936	TPM4_HUMAN
35	41.52	41.52	28.53	22.51	17.63	tr|A0A087WVQ6|A0A087WVQ6_HUMAN	Clathrin heavy chain OS=Homo sapiens GN=CLTC PE=1 SV=1	HUMAN	24	tr	A0A087WVQ6	A0A087WVQ6_HUMAN
36	41.49	68.67	61.69	53.02	48.85	sp|O43707|ACTN4_HUMAN	Alpha-actinin-4 OS=Homo sapiens GN=ACTN4 PE=1 SV=2	HUMAN	61	sp	O43707	ACTN4_HUMAN
37	41.31	42.19	18.26	13.19	9.732	tr|D6RGG3|D6RGG3_HUMAN	Collagen alpha-1(XII) chain OS=Homo sapiens GN=COL12A1 PE=1 SV=1	HUMAN	21	tr	D6RGG3	D6RGG3_HUMAN
38	41.05	41.05	65.66	63.25	55.12	sp|P00338|LDHA_HUMAN	L-lactate dehydrogenase A chain OS=Homo sapiens GN=LDHA PE=1 SV=2	HUMAN	37	sp	P00338	LDHA_HUMAN
39	40.71	40.71	69.65	68.91	60.7	sp|P05121|PAI1_HUMAN	Plasminogen activator inhibitor 1 OS=Homo sapiens GN=SERPINE1 PE=1 SV=1	HUMAN	38	sp	P05121	PAI1_HUMAN
40	39.95	41.68	69.36	63.29	55.78	sp|P04083|ANXA1_HUMAN	Annexin A1 OS=Homo sapiens GN=ANXA1 PE=1 SV=2	HUMAN	29	sp	P04083	ANXA1_HUMAN
41	39.69	39.69	72.59	64.08	62.38	sp|P06576|ATPB_HUMAN	ATP synthase subunit beta, mitochondrial OS=Homo sapiens GN=ATP5B PE=1 SV=3	HUMAN	25	sp	P06576	ATPB_HUMAN
42	37.64	39.16	47.6	38.91	36.74	sp|P13667|PDIA4_HUMAN	Protein disulfide-isomerase A4 OS=Homo sapiens GN=PDIA4 PE=1 SV=2	HUMAN	24	sp	P13667	PDIA4_HUMAN
43	37.55	37.55	48.54	42.83	34.41	sp|P08123|CO1A2_HUMAN	Collagen alpha-2(I) chain OS=Homo sapiens GN=COL1A2 PE=1 SV=7	HUMAN	42	sp	P08123	CO1A2_HUMAN
44	36.95	36.99	78.61	74.13	73.63	sp|Q01995|TAGL_HUMAN	Transgelin OS=Homo sapiens GN=TAGLN PE=1 SV=4	HUMAN	37	sp	Q01995	TAGL_HUMAN
45	36.53	36.53	36.01	31.57	25.43	sp|P22314|UBA1_HUMAN	Ubiquitin-like modifier-activating enzyme 1 OS=Homo sapiens GN=UBA1 PE=1 SV=3	HUMAN	18	sp	P22314	UBA1_HUMAN
46	36.43	36.81	53.53	37.77	29.23	sp|P02768|ALBU_HUMAN	Serum albumin OS=Homo sapiens GN=ALB PE=1 SV=2	HUMAN	35	sp	P02768	ALBU_HUMAN
47	36.18	48.65	70.42	55.56	47.89	sp|P35908|K22E_HUMAN	Keratin, type II cytoskeletal 2 epidermal OS=Homo sapiens GN=KRT2 PE=1 SV=2	HUMAN	25	sp	P35908	K22E_HUMAN
48	35.47	35.47	45.29	36.6	27.3	sp|P55072|TERA_HUMAN	Transitional endoplasmic reticulum ATPase OS=Homo sapiens GN=VCP PE=1 SV=4	HUMAN	23	sp	P55072	TERA_HUMAN
49	35.37	35.37	64.99	56.12	46.52	sp|P00558|PGK1_HUMAN	Phosphoglycerate kinase 1 OS=Homo sapiens GN=PGK1 PE=1 SV=3	HUMAN	22	sp	P00558	PGK1_HUMAN
50	34.74	35.45	58.21	53.3	46.48	sp|P03956|MMP1_HUMAN	Interstitial collagenase OS=Homo sapiens GN=MMP1 PE=1 SV=3	HUMAN	22	sp	P03956	MMP1_HUMAN
51	34.63	34.63	56.06	48.64	41.41	sp|P25705|ATPA_HUMAN	ATP synthase subunit alpha, mitochondrial OS=Homo sapiens GN=ATP5A1 PE=1 SV=1	HUMAN	18	sp	P25705	ATPA_HUMAN
52	34.54	34.54	67.46	56.22	54.78	sp|P50454|SERPH_HUMAN	Serpin H1 OS=Homo sapiens GN=SERPINH1 PE=1 SV=2	HUMAN	27	sp	P50454	SERPH_HUMAN
53	34.42	35.11	47.95	41.42	34.14	tr|E9PGZ1|E9PGZ1_HUMAN	Caldesmon OS=Homo sapiens GN=CALD1 PE=1 SV=1	HUMAN	19	tr	E9PGZ1	E9PGZ1_HUMAN
54	34.07	34.07	51.72	46.04	44.02	sp|Q16658|FSCN1_HUMAN	Fascin OS=Homo sapiens GN=FSCN1 PE=1 SV=3	HUMAN	21	sp	Q16658	FSCN1_HUMAN
55	34.01	34.01	54.08	34.27	22.26	sp|P13639|EF2_HUMAN	Elongation factor 2 OS=Homo sapiens GN=EEF2 PE=1 SV=4	HUMAN	18	sp	P13639	EF2_HUMAN
56	33.79	34.82	53.66	50.78	49.22	sp|P68363|TBA1B_HUMAN	Tubulin alpha-1B chain OS=Homo sapiens GN=TUBA1B PE=1 SV=1	HUMAN	27	sp	P68363	TBA1B_HUMAN
57	32.8	35.84	42.96	36.49	27.9	sp|P14625|ENPL_HUMAN	Endoplasmin OS=Homo sapiens GN=HSP90B1 PE=1 SV=1	HUMAN	23	sp	P14625	ENPL_HUMAN
58	31.19	32.12	46.91	41.21	22.28	tr|B1ALD9|B1ALD9_HUMAN	Periostin OS=Homo sapiens GN=POSTN PE=1 SV=1	HUMAN	16	tr	B1ALD9	B1ALD9_HUMAN
59	30.68	30.68	48.41	45.68	44.32	sp|Q15084|PDIA6_HUMAN	Protein disulfide-isomerase A6 OS=Homo sapiens GN=PDIA6 PE=1 SV=1	HUMAN	18	sp	Q15084	PDIA6_HUMAN
60	30.59	30.59	68.06	67.13	63.89	sp|P23284|PPIB_HUMAN	Peptidyl-prolyl cis-trans isomerase B OS=Homo sapiens GN=PPIB PE=1 SV=2	HUMAN	28	sp	P23284	PPIB_HUMAN
61	29.61	29.65	32.99	26.99	23.27	sp|P15144|AMPN_HUMAN	Aminopeptidase N OS=Homo sapiens GN=ANPEP PE=1 SV=4	HUMAN	17	sp	P15144	AMPN_HUMAN
62	29.18	29.82	23.18	14.48	12.78	tr|A0A0A0MTC7|A0A0A0MTC7_HUMAN	Laminin subunit alpha-4 OS=Homo sapiens GN=LAMA4 PE=1 SV=1	HUMAN	15	tr	A0A0A0MTC7	A0A0A0MTC7_HUMAN
63	28.82	28.82	35.4	33.17	27.46	sp|P13797|PLST_HUMAN	Plastin-3 OS=Homo sapiens GN=PLS3 PE=1 SV=4	HUMAN	18	sp	P13797	PLST_HUMAN
64	28.68	28.68	45.05	42.74	30.86	sp|O75083|WDR1_HUMAN	WD repeat-containing protein 1 OS=Homo sapiens GN=WDR1 PE=1 SV=4	HUMAN	13	sp	O75083	WDR1_HUMAN
65	28.67	28.67	51.69	43.82	42.7	sp|P50395|GDIB_HUMAN	Rab GDP dissociation inhibitor beta OS=Homo sapiens GN=GDI2 PE=1 SV=2	HUMAN	19	sp	P50395	GDIB_HUMAN
66	28.29	28.29	55.78	52.26	52.26	sp|Q06830|PRDX1_HUMAN	Peroxiredoxin-1 OS=Homo sapiens GN=PRDX1 PE=1 SV=1	HUMAN	25	sp	Q06830	PRDX1_HUMAN
67	27.72	29.34	52.01	45.1	39.97	sp|P35527|K1C9_HUMAN	Keratin, type I cytoskeletal 9 OS=Homo sapiens GN=KRT9 PE=1 SV=3	HUMAN	17	sp	P35527	K1C9_HUMAN
68	27.55	27.55	51.2	49.4	40.96	tr|F8W809|F8W809_HUMAN	Thioredoxin reductase 1, cytoplasmic OS=Homo sapiens GN=TXNRD1 PE=1 SV=1	HUMAN	17	tr	F8W809	F8W809_HUMAN
69	27.45	29.15	54.83	41.6	28.23	sp|P08133|ANXA6_HUMAN	Annexin A6 OS=Homo sapiens GN=ANXA6 PE=1 SV=3	HUMAN	14	sp	P08133	ANXA6_HUMAN
70	27.31	27.31	46.75	42.64	42.64	sp|P68104|EF1A1_HUMAN	Elongation factor 1-alpha 1 OS=Homo sapiens GN=EEF1A1 PE=1 SV=1	HUMAN	23	sp	P68104	EF1A1_HUMAN
71	27.13	27.16	28.07	21.44	19.1	tr|A0A087X0S5|A0A087X0S5_HUMAN	Collagen alpha-1(VI) chain OS=Homo sapiens GN=COL6A1 PE=1 SV=1	HUMAN	17	tr	A0A087X0S5	A0A087X0S5_HUMAN
72	26.91	26.91	31.69	24.23	24.23	sp|P19338|NUCL_HUMAN	Nucleolin OS=Homo sapiens GN=NCL PE=1 SV=3	HUMAN	15	sp	P19338	NUCL_HUMAN
73	26.76	28.9	40.21	30.78	25.77	sp|P38646|GRP75_HUMAN	Stress-70 protein, mitochondrial OS=Homo sapiens GN=HSPA9 PE=1 SV=2	HUMAN	15	sp	P38646	GRP75_HUMAN
74	26.47	26.47	64.78	63.58	59.4	sp|P04406|G3P_HUMAN	Glyceraldehyde-3-phosphate dehydrogenase OS=Homo sapiens GN=GAPDH PE=1 SV=3	HUMAN	39	sp	P04406	G3P_HUMAN
75	26.1	26.11	56.56	56.56	55	sp|P08758|ANXA5_HUMAN	Annexin A5 OS=Homo sapiens GN=ANXA5 PE=1 SV=2	HUMAN	18	sp	P08758	ANXA5_HUMAN
76	25.98	25.98	44.72	38.44	35.43	sp|P07093|GDN_HUMAN	Glia-derived nexin OS=Homo sapiens GN=SERPINE2 PE=1 SV=1	HUMAN	16	sp	P07093	GDN_HUMAN
77	25.64	25.64	74.55	72.77	66.52	sp|P30041|PRDX6_HUMAN	Peroxiredoxin-6 OS=Homo sapiens GN=PRDX6 PE=1 SV=3	HUMAN	22	sp	P30041	PRDX6_HUMAN
78	24.08	24.08	41.67	35.86	28.28	sp|P02452|CO1A1_HUMAN	Collagen alpha-1(I) chain OS=Homo sapiens GN=COL1A1 PE=1 SV=5	HUMAN	35	sp	P02452	CO1A1_HUMAN
79	23.88	23.88	73.63	70.55	57.53	tr|Q32Q12|Q32Q12_HUMAN	Nucleoside diphosphate kinase OS=Homo sapiens GN=NME1-NME2 PE=1 SV=1	HUMAN	22	tr	Q32Q12	Q32Q12_HUMAN
80	23.53	23.53	57.14	43.1	35.96	sp|P60842|IF4A1_HUMAN	Eukaryotic initiation factor 4A-I OS=Homo sapiens GN=EIF4A1 PE=1 SV=1	HUMAN	15	sp	P60842	IF4A1_HUMAN
81	23.43	23.43	23.68	16.07	13.68	sp|P07996|TSP1_HUMAN	Thrombospondin-1 OS=Homo sapiens GN=THBS1 PE=1 SV=2	HUMAN	14	sp	P07996	TSP1_HUMAN
82	23.04	23.04	39.72	35.19	32.58	sp|P21589|5NTD_HUMAN	5'-nucleotidase OS=Homo sapiens GN=NT5E PE=1 SV=1	HUMAN	14	sp	P21589	5NTD_HUMAN
83	23.01	23.01	69.27	69.27	54.15	sp|P04792|HSPB1_HUMAN	Heat shock protein beta-1 OS=Homo sapiens GN=HSPB1 PE=1 SV=2	HUMAN	14	sp	P04792	HSPB1_HUMAN
84	22.93	43.28	52.05	41.98	32.25	tr|E7EQR4|E7EQR4_HUMAN	Ezrin OS=Homo sapiens GN=EZR PE=1 SV=3	HUMAN	25	tr	E7EQR4	E7EQR4_HUMAN
85	22.87	23.25	16.34	9.142	6.675	sp|Q13813|SPTN1_HUMAN	Spectrin alpha chain, non-erythrocytic 1 OS=Homo sapiens GN=SPTAN1 PE=1 SV=3	HUMAN	12	sp	Q13813	SPTN1_HUMAN
86	22.86	47.3	42.9	40.98	36.61	sp|P07900|HS90A_HUMAN	Heat shock protein HSP 90-alpha OS=Homo sapiens GN=HSP90AA1 PE=1 SV=5	HUMAN	31	sp	P07900	HS90A_HUMAN
87	22.79	22.79	56.63	40	32.84	sp|Q01518|CAP1_HUMAN	Adenylyl cyclase-associated protein 1 OS=Homo sapiens GN=CAP1 PE=1 SV=5	HUMAN	13	sp	Q01518	CAP1_HUMAN
88	22.59	22.65	38.3	33.95	27.54	sp|P52209|6PGD_HUMAN	6-phosphogluconate dehydrogenase, decarboxylating OS=Homo sapiens GN=PGD PE=1 SV=3	HUMAN	12	sp	P52209	6PGD_HUMAN
89	22.28	22.52	28.71	25.42	16.21	sp|Q14697|GANAB_HUMAN	Neutral alpha-glucosidase AB OS=Homo sapiens GN=GANAB PE=1 SV=3	HUMAN	11	sp	Q14697	GANAB_HUMAN
90	21.88	21.88	60.41	57.55	46.94	sp|P27348|1433T_HUMAN	14-3-3 protein theta OS=Homo sapiens GN=YWHAQ PE=1 SV=1	HUMAN	15	sp	P27348	1433T_HUMAN
91	21.82	21.82	32.61	26.52	20.43	sp|P41250|SYG_HUMAN	Glycine--tRNA ligase OS=Homo sapiens GN=GARS PE=1 SV=3	HUMAN	11	sp	P41250	SYG_HUMAN
92	21.8	21.8	39.82	31.81	23.8	sp|P26641|EF1G_HUMAN	Elongation factor 1-gamma OS=Homo sapiens GN=EEF1G PE=1 SV=3	HUMAN	10	sp	P26641	EF1G_HUMAN
93	21.57	23.25	39.03	32.73	21.58	sp|P17987|TCPA_HUMAN	T-complex protein 1 subunit alpha OS=Homo sapiens GN=TCP1 PE=1 SV=1	HUMAN	9	sp	P17987	TCPA_HUMAN
94	21.56	21.56	53.75	45.28	38.11	tr|F8W6I7|F8W6I7_HUMAN	Heterogeneous nuclear ribonucleoprotein A1 OS=Homo sapiens GN=HNRNPA1 PE=1 SV=2	HUMAN	12	tr	F8W6I7	F8W6I7_HUMAN
95	21.43	21.43	30.64	23.72	22.41	sp|P04843|RPN1_HUMAN	Dolichyl-diphosphooligosaccharide--protein glycosyltransferase subunit 1 OS=Homo sapiens GN=RPN1 PE=1 SV=1	HUMAN	11	sp	P04843	RPN1_HUMAN
96	21.27	21.27	48.61	46.53	40.51	sp|Q8NBS9|TXND5_HUMAN	Thioredoxin domain-containing protein 5 OS=Homo sapiens GN=TXNDC5 PE=1 SV=2	HUMAN	17	sp	Q8NBS9	TXND5_HUMAN
97	21.22	21.22	25.79	17.62	12.17	sp|P53396|ACLY_HUMAN	ATP-citrate synthase OS=Homo sapiens GN=ACLY PE=1 SV=3	HUMAN	13	sp	P53396	ACLY_HUMAN
98	21.05	21.05	27.31	22.76	20.35	sp|O00391|QSOX1_HUMAN	Sulfhydryl oxidase 1 OS=Homo sapiens GN=QSOX1 PE=1 SV=3	HUMAN	12	sp	O00391	QSOX1_HUMAN
99	21	21.5	51.04	42.14	33.83	sp|P37837|TALDO_HUMAN	Transaldolase OS=Homo sapiens GN=TALDO1 PE=1 SV=2	HUMAN	14	sp	P37837	TALDO_HUMAN
100	20.6	25.13	28.71	24.84	16.94	tr|J9JID7|J9JID7_HUMAN	Lamin B2, isoform CRA_a OS=Homo sapiens GN=LMNB2 PE=1 SV=1	HUMAN	12	tr	J9JID7	J9JID7_HUMAN
101	20.55	20.55	17.37	12.42	9.701	sp|P01023|A2MG_HUMAN	Alpha-2-macroglobulin OS=Homo sapiens GN=A2M PE=1 SV=3	HUMAN	19	sp	P01023	A2MG_HUMAN
102	20.14	21.07	46.33	35.03	25.99	sp|P40227|TCPZ_HUMAN	T-complex protein 1 subunit zeta OS=Homo sapiens GN=CCT6A PE=1 SV=3	HUMAN	9	sp	P40227	TCPZ_HUMAN
103	20.12	22.62	52.1	47.01	29.64	sp|P07195|LDHB_HUMAN	L-lactate dehydrogenase B chain OS=Homo sapiens GN=LDHB PE=1 SV=2	HUMAN	15	sp	P07195	LDHB_HUMAN
104	20.09	35.06	64.22	56.03	50.43	tr|Q5HYB6|Q5HYB6_HUMAN	Epididymis luminal protein 189 OS=Homo sapiens GN=DKFZp686J1372 PE=1 SV=1	HUMAN	19	tr	Q5HYB6	Q5HYB6_HUMAN
105	19.21	19.21	37.9	32.92	28.11	sp|P36871|PGM1_HUMAN	Phosphoglucomutase-1 OS=Homo sapiens GN=PGM1 PE=1 SV=3	HUMAN	11	sp	P36871	PGM1_HUMAN
106	18.97	18.97	49.16	36.07	28.79	sp|P78371|TCPB_HUMAN	T-complex protein 1 subunit beta OS=Homo sapiens GN=CCT2 PE=1 SV=4	HUMAN	10	sp	P78371	TCPB_HUMAN
107	18.96	18.96	64.82	61.81	57.79	sp|P37802|TAGL2_HUMAN	Transgelin-2 OS=Homo sapiens GN=TAGLN2 PE=1 SV=3	HUMAN	17	sp	P37802	TAGL2_HUMAN
108	18.74	18.74	49.7	40.36	37.95	sp|Q53FA7|QORX_HUMAN	Quinone oxidoreductase PIG3 OS=Homo sapiens GN=TP53I3 PE=1 SV=2	HUMAN	19	sp	Q53FA7	QORX_HUMAN
109	18.58	18.91	61.29	52.42	47.18	sp|O14818|PSA7_HUMAN	Proteasome subunit alpha type-7 OS=Homo sapiens GN=PSMA7 PE=1 SV=1	HUMAN	11	sp	O14818	PSA7_HUMAN
110	18.49	18.49	35.13	31.9	26.29	sp|P01008|ANT3_HUMAN	Antithrombin-III OS=Homo sapiens GN=SERPINC1 PE=1 SV=1	HUMAN	16	sp	P01008	ANT3_HUMAN
111	18.43	18.43	82.52	58.25	57.28	sp|P62805|H4_HUMAN	Histone H4 OS=Homo sapiens GN=HIST1H4A PE=1 SV=2	HUMAN	28	sp	P62805	H4_HUMAN
112	18.18	18.18	25.16	17.99	15.65	tr|A0A0A0MT01|A0A0A0MT01_HUMAN	Gelsolin OS=Homo sapiens GN=GSN PE=1 SV=1	HUMAN	11	tr	A0A0A0MT01	A0A0A0MT01_HUMAN
113	18.05	18.05	36.97	26.95	26.95	sp|P10909|CLUS_HUMAN	Clusterin OS=Homo sapiens GN=CLU PE=1 SV=1	HUMAN	11	sp	P10909	CLUS_HUMAN
114	17.97	18.44	35.24	23.69	12.02	sp|P34932|HSP74_HUMAN	Heat shock 70 kDa protein 4 OS=Homo sapiens GN=HSPA4 PE=1 SV=4	HUMAN	8	sp	P34932	HSP74_HUMAN
115	17.81	17.81	51.17	36.81	36.81	sp|P36222|CH3L1_HUMAN	Chitinase-3-like protein 1 OS=Homo sapiens GN=CHI3L1 PE=1 SV=2	HUMAN	15	sp	P36222	CH3L1_HUMAN
116	17.62	17.62	36.29	25.45	19.05	sp|P12956|XRCC6_HUMAN	X-ray repair cross-complementing protein 6 OS=Homo sapiens GN=XRCC6 PE=1 SV=2	HUMAN	9	sp	P12956	XRCC6_HUMAN
117	17.29	17.29	74.29	74.29	67.86	sp|P07737|PROF1_HUMAN	Profilin-1 OS=Homo sapiens GN=PFN1 PE=1 SV=2	HUMAN	17	sp	P07737	PROF1_HUMAN
118	17.27	17.27	60.06	51.78	39.94	sp|P40926|MDHM_HUMAN	Malate dehydrogenase, mitochondrial OS=Homo sapiens GN=MDH2 PE=1 SV=3	HUMAN	11	sp	P40926	MDHM_HUMAN
119	17.18	17.18	51.45	44.81	44.81	sp|P20618|PSB1_HUMAN	Proteasome subunit beta type-1 OS=Homo sapiens GN=PSMB1 PE=1 SV=2	HUMAN	10	sp	P20618	PSB1_HUMAN
120	17.16	17.16	62.14	56.38	49.38	sp|P23396|RS3_HUMAN	40S ribosomal protein S3 OS=Homo sapiens GN=RPS3 PE=1 SV=2	HUMAN	10	sp	P23396	RS3_HUMAN
121	17	19.24	52.53	41.92	41.92	sp|P32119|PRDX2_HUMAN	Peroxiredoxin-2 OS=Homo sapiens GN=PRDX2 PE=1 SV=5	HUMAN	14	sp	P32119	PRDX2_HUMAN
122	16.85	16.94	16.08	9.282	7.845	tr|G3XAI2|G3XAI2_HUMAN	Laminin subunit beta-1 OS=Homo sapiens GN=LAMB1 PE=1 SV=1	HUMAN	10	tr	G3XAI2	G3XAI2_HUMAN
123	16.81	16.81	35.43	29.35	25.1	sp|O60701|UGDH_HUMAN	UDP-glucose 6-dehydrogenase OS=Homo sapiens GN=UGDH PE=1 SV=1	HUMAN	9	sp	O60701	UGDH_HUMAN
124	16.73	16.73	33.74	28.81	25.51	tr|E9PEX6|E9PEX6_HUMAN	Dihydrolipoyl dehydrogenase, mitochondrial OS=Homo sapiens GN=DLD PE=1 SV=1	HUMAN	10	tr	E9PEX6	E9PEX6_HUMAN
125	16.67	17.07	14.73	10.82	8.479	sp|P01024|CO3_HUMAN	Complement C3 OS=Homo sapiens GN=C3 PE=1 SV=2	HUMAN	15	sp	P01024	CO3_HUMAN
126	16.66	16.69	47.88	27.81	19.52	sp|P31948|STIP1_HUMAN	Stress-induced-phosphoprotein 1 OS=Homo sapiens GN=STIP1 PE=1 SV=1	HUMAN	9	sp	P31948	STIP1_HUMAN
127	16.65	16.65	59.05	57.62	57.62	sp|P09211|GSTP1_HUMAN	Glutathione S-transferase P OS=Homo sapiens GN=GSTP1 PE=1 SV=2	HUMAN	12	sp	P09211	GSTP1_HUMAN
128	16.5	16.5	47.16	37.5	37.5	tr|B4DY09|B4DY09_HUMAN	Interleukin enhancer-binding factor 2 OS=Homo sapiens GN=ILF2 PE=1 SV=1	HUMAN	9	tr	B4DY09	B4DY09_HUMAN
129	16.35	16.51	38.45	28.65	20.7	sp|P48643|TCPE_HUMAN	T-complex protein 1 subunit epsilon OS=Homo sapiens GN=CCT5 PE=1 SV=1	HUMAN	7	sp	P48643	TCPE_HUMAN
130	16.23	16.23	35.77	28.47	16.61	sp|P50990|TCPQ_HUMAN	T-complex protein 1 subunit theta OS=Homo sapiens GN=CCT8 PE=1 SV=4	HUMAN	9	sp	P50990	TCPQ_HUMAN
131	16.12	16.12	33.33	31.25	20.14	sp|P23526|SAHH_HUMAN	Adenosylhomocysteinase OS=Homo sapiens GN=AHCY PE=1 SV=4	HUMAN	8	sp	P23526	SAHH_HUMAN
132	15.97	15.97	54.36	37.58	26.17	sp|P05141|ADT2_HUMAN	ADP/ATP translocase 2 OS=Homo sapiens GN=SLC25A5 PE=1 SV=7	HUMAN	9	sp	P05141	ADT2_HUMAN
133	15.89	21.06	64.71	54.51	49.8	sp|P62258|1433E_HUMAN	14-3-3 protein epsilon OS=Homo sapiens GN=YWHAE PE=1 SV=1	HUMAN	15	sp	P62258	1433E_HUMAN
134	15.85	15.85	36.88	26.46	16.05	sp|Q02818|NUCB1_HUMAN	Nucleobindin-1 OS=Homo sapiens GN=NUCB1 PE=1 SV=4	HUMAN	7	sp	Q02818	NUCB1_HUMAN
135	15.8	15.8	45.45	42.12	35.45	tr|A0A087WZH7|A0A087WZH7_HUMAN	Myristoylated alanine-rich C-kinase substrate OS=Homo sapiens GN=MARCKS PE=1 SV=1	HUMAN	8	tr	A0A087WZH7	A0A087WZH7_HUMAN
136	15.6	15.61	59.93	48.53	36.03	sp|P35232|PHB_HUMAN	Prohibitin OS=Homo sapiens GN=PHB PE=1 SV=1	HUMAN	8	sp	P35232	PHB_HUMAN
137	15.55	15.99	34.09	32.17	19.23	sp|Q16555|DPYL2_HUMAN	Dihydropyrimidinase-related protein 2 OS=Homo sapiens GN=DPYSL2 PE=1 SV=1	HUMAN	7	sp	Q16555	DPYL2_HUMAN
138	15.52	15.63	36.99	27.74	27.74	tr|G3V4C1|G3V4C1_HUMAN	Heterogeneous nuclear ribonucleoproteins C1/C2 OS=Homo sapiens GN=HNRNPC PE=1 SV=1	HUMAN	12	tr	G3V4C1	G3V4C1_HUMAN
139	15.51	15.51	30.17	23.84	20.89	sp|Q9ULV4|COR1C_HUMAN	Coronin-1C OS=Homo sapiens GN=CORO1C PE=1 SV=1	HUMAN	7	sp	Q9ULV4	COR1C_HUMAN
140	15.07	20.06	37.71	29.87	23.31	sp|P02533|K1C14_HUMAN	Keratin, type I cytoskeletal 14 OS=Homo sapiens GN=KRT14 PE=1 SV=4	HUMAN	11	sp	P02533	K1C14_HUMAN
141	14.91	21.09	56.91	53.66	44.72	tr|E7EX29|E7EX29_HUMAN	14-3-3 protein zeta/delta (Fragment) OS=Homo sapiens GN=YWHAZ PE=1 SV=1	HUMAN	13	tr	E7EX29	E7EX29_HUMAN
142	14.9	15.27	47.9	33.05	22.69	sp|P30533|AMRP_HUMAN	Alpha-2-macroglobulin receptor-associated protein OS=Homo sapiens GN=LRPAP1 PE=1 SV=1	HUMAN	7	sp	P30533	AMRP_HUMAN
143	14.86	14.86	28.02	22.39	16.62	sp|Q96TA1|NIBL1_HUMAN	Niban-like protein 1 OS=Homo sapiens GN=FAM129B PE=1 SV=3	HUMAN	9	sp	Q96TA1	NIBL1_HUMAN
144	14.71	14.71	14.1	7.806	3.226	sp|P49327|FAS_HUMAN	Fatty acid synthase OS=Homo sapiens GN=FASN PE=1 SV=3	HUMAN	6	sp	P49327	FAS_HUMAN
145	14.7	14.7	55.51	55.51	45.28	sp|P18669|PGAM1_HUMAN	Phosphoglycerate mutase 1 OS=Homo sapiens GN=PGAM1 PE=1 SV=2	HUMAN	16	sp	P18669	PGAM1_HUMAN
146	14.58	14.58	15.25	7.511	5.161	sp|P0C0L4|CO4A_HUMAN	Complement C4-A OS=Homo sapiens GN=C4A PE=1 SV=2	HUMAN	9	sp	P0C0L4	CO4A_HUMAN
147	14.52	30.74	84.51	78.87	64.79	tr|H0YKX5|H0YKX5_HUMAN	Tropomyosin alpha-1 chain (Fragment) OS=Homo sapiens GN=TPM1 PE=1 SV=1	HUMAN	17	tr	H0YKX5	H0YKX5_HUMAN
148	14.49	14.55	39.1	27.5	18.66	sp|P12081|SYHC_HUMAN	Histidine--tRNA ligase, cytoplasmic OS=Homo sapiens GN=HARS PE=1 SV=2	HUMAN	8	sp	P12081	SYHC_HUMAN
149	14.45	14.45	13.04	9.239	8.333	sp|Q9BSJ8|ESYT1_HUMAN	Extended synaptotagmin-1 OS=Homo sapiens GN=ESYT1 PE=1 SV=1	HUMAN	7	sp	Q9BSJ8	ESYT1_HUMAN
150	14.44	14.46	43.69	28.16	19.22	sp|P11413|G6PD_HUMAN	Glucose-6-phosphate 1-dehydrogenase OS=Homo sapiens GN=G6PD PE=1 SV=4	HUMAN	8	sp	P11413	G6PD_HUMAN
151	14.29	16.3	69.09	56.97	46.06	sp|P62937|PPIA_HUMAN	Peptidyl-prolyl cis-trans isomerase A OS=Homo sapiens GN=PPIA PE=1 SV=2	HUMAN	20	sp	P62937	PPIA_HUMAN
152	14.25	16.08	44.48	35.69	27.48	sp|P22626|ROA2_HUMAN	Heterogeneous nuclear ribonucleoproteins A2/B1 OS=Homo sapiens GN=HNRNPA2B1 PE=1 SV=2	HUMAN	11	sp	P22626	ROA2_HUMAN
153	14.22	14.22	31.58	21.68	20.63	sp|Q96KP4|CNDP2_HUMAN	Cytosolic non-specific dipeptidase OS=Homo sapiens GN=CNDP2 PE=1 SV=2	HUMAN	8	sp	Q96KP4	CNDP2_HUMAN
154	14.19	15.4	11.5	5.41	4.776	tr|A0A087WUZ3|A0A087WUZ3_HUMAN	Spectrin beta chain, non-erythrocytic 1 OS=Homo sapiens GN=SPTBN1 PE=1 SV=1	HUMAN	9	tr	A0A087WUZ3	A0A087WUZ3_HUMAN
155	14.14	14.14	36.38	35.21	31.92	sp|P08476|INHBA_HUMAN	Inhibin beta A chain OS=Homo sapiens GN=INHBA PE=1 SV=2	HUMAN	12	sp	P08476	INHBA_HUMAN
156	14.1	14.1	56.38	47.87	35.82	sp|Q16270|IBP7_HUMAN	Insulin-like growth factor-binding protein 7 OS=Homo sapiens GN=IGFBP7 PE=1 SV=1	HUMAN	17	sp	Q16270	IBP7_HUMAN
157	13.94	13.94	27.15	20.45	10.48	sp|Q96AY3|FKB10_HUMAN	Peptidyl-prolyl cis-trans isomerase FKBP10 OS=Homo sapiens GN=FKBP10 PE=1 SV=1	HUMAN	7	sp	Q96AY3	FKB10_HUMAN
158	13.89	13.89	67.2	55.03	55.03	sp|Q99497|PARK7_HUMAN	Protein deglycase DJ-1 OS=Homo sapiens GN=PARK7 PE=1 SV=2	HUMAN	9	sp	Q99497	PARK7_HUMAN
159	13.82	13.82	36.56	36.56	33.87	tr|I3L504|I3L504_HUMAN	Eukaryotic translation initiation factor 5A-1 OS=Homo sapiens GN=EIF5A PE=1 SV=1	HUMAN	8	tr	I3L504	I3L504_HUMAN
160	13.76	13.84	13.49	10.94	7.582	sp|P11047|LAMC1_HUMAN	Laminin subunit gamma-1 OS=Homo sapiens GN=LAMC1 PE=1 SV=3	HUMAN	8	sp	P11047	LAMC1_HUMAN
161	13.71	13.71	46.77	36.5	33.46	sp|P28074|PSB5_HUMAN	Proteasome subunit beta type-5 OS=Homo sapiens GN=PSMB5 PE=1 SV=3	HUMAN	7	sp	P28074	PSB5_HUMAN
162	13.69	13.69	68.72	64.32	58.15	sp|P80723|BASP1_HUMAN	Brain acid soluble protein 1 OS=Homo sapiens GN=BASP1 PE=1 SV=2	HUMAN	7	sp	P80723	BASP1_HUMAN
163	13.67	13.67	54.97	47.02	37.75	sp|P62277|RS13_HUMAN	40S ribosomal protein S13 OS=Homo sapiens GN=RPS13 PE=1 SV=2	HUMAN	7	sp	P62277	RS13_HUMAN
164	13.66	13.66	20.34	16.75	15.21	sp|Q08380|LG3BP_HUMAN	Galectin-3-binding protein OS=Homo sapiens GN=LGALS3BP PE=1 SV=1	HUMAN	7	sp	Q08380	LG3BP_HUMAN
165	13.65	13.65	52.85	36.5	31.18	sp|P25786|PSA1_HUMAN	Proteasome subunit alpha type-1 OS=Homo sapiens GN=PSMA1 PE=1 SV=1	HUMAN	8	sp	P25786	PSA1_HUMAN
166	13.57	13.57	52.63	48.68	43.42	sp|P62269|RS18_HUMAN	40S ribosomal protein S18 OS=Homo sapiens GN=RPS18 PE=1 SV=3	HUMAN	8	sp	P62269	RS18_HUMAN
167	13.54	13.54	49.15	49.15	49.15	tr|J3QRS3|J3QRS3_HUMAN	Myosin regulatory light chain 12A OS=Homo sapiens GN=MYL12A PE=1 SV=1	HUMAN	11	tr	J3QRS3	J3QRS3_HUMAN
168	13.44	13.44	22.97	11.65	10.66	sp|Q7KZF4|SND1_HUMAN	Staphylococcal nuclease domain-containing protein 1 OS=Homo sapiens GN=SND1 PE=1 SV=1	HUMAN	8	sp	Q7KZF4	SND1_HUMAN
169	13.29	13.29	55.21	46.88	40.63	sp|P09601|HMOX1_HUMAN	Heme oxygenase 1 OS=Homo sapiens GN=HMOX1 PE=1 SV=1	HUMAN	9	sp	P09601	HMOX1_HUMAN
170	13.18	13.18	69.74	57.89	50.66	tr|J3KND3|J3KND3_HUMAN	Myosin light polypeptide 6 OS=Homo sapiens GN=MYL6 PE=1 SV=1	HUMAN	8	tr	J3KND3	J3KND3_HUMAN
171	13.16	13.23	36.49	31.03	26.44	sp|P40121|CAPG_HUMAN	Macrophage-capping protein OS=Homo sapiens GN=CAPG PE=1 SV=2	HUMAN	9	sp	P40121	CAPG_HUMAN
172	13.01	13.01	39.71	32.78	27.27	sp|P61158|ARP3_HUMAN	Actin-related protein 3 OS=Homo sapiens GN=ACTR3 PE=1 SV=3	HUMAN	9	sp	P61158	ARP3_HUMAN
173	13	13	36.39	31.63	27.21	sp|P06748|NPM_HUMAN	Nucleophosmin OS=Homo sapiens GN=NPM1 PE=1 SV=2	HUMAN	9	sp	P06748	NPM_HUMAN
174	12.9	12.9	54.11	43.15	43.15	sp|P62249|RS16_HUMAN	40S ribosomal protein S16 OS=Homo sapiens GN=RPS16 PE=1 SV=2	HUMAN	8	sp	P62249	RS16_HUMAN
175	12.88	12.88	28.09	26.21	16.98	sp|P08254|MMP3_HUMAN	Stromelysin-1 OS=Homo sapiens GN=MMP3 PE=1 SV=2	HUMAN	7	sp	P08254	MMP3_HUMAN
176	12.86	12.9	54.85	41.83	41.83	sp|Q15019|SEPT2_HUMAN	Septin-2 OS=Homo sapiens GN=SEPT2 PE=1 SV=1	HUMAN	9	sp	Q15019	SEPT2_HUMAN
177	12.84	13.08	45.45	41.61	39.86	sp|P52907|CAZA1_HUMAN	F-actin-capping protein subunit alpha-1 OS=Homo sapiens GN=CAPZA1 PE=1 SV=3	HUMAN	8	sp	P52907	CAZA1_HUMAN
178	12.8	13.36	16.99	11.03	6.699	sp|P53621|COPA_HUMAN	Coatomer subunit alpha OS=Homo sapiens GN=COPA PE=1 SV=2	HUMAN	6	sp	P53621	COPA_HUMAN
179	12.69	20.45	44.72	40.65	32.11	sp|Q04917|1433F_HUMAN	14-3-3 protein eta OS=Homo sapiens GN=YWHAH PE=1 SV=4	HUMAN	13	sp	Q04917	1433F_HUMAN
180	12.67	12.67	39.1	35.03	20.77	sp|P43490|NAMPT_HUMAN	Nicotinamide phosphoribosyltransferase OS=Homo sapiens GN=NAMPT PE=1 SV=1	HUMAN	6	sp	P43490	NAMPT_HUMAN
181	12.62	12.62	55.1	55.1	55.1	sp|Q99584|S10AD_HUMAN	Protein S100-A13 OS=Homo sapiens GN=S100A13 PE=1 SV=1	HUMAN	7	sp	Q99584	S10AD_HUMAN
182	12.6	12.65	24.68	19.85	17.07	sp|P50991|TCPD_HUMAN	T-complex protein 1 subunit delta OS=Homo sapiens GN=CCT4 PE=1 SV=4	HUMAN	7	sp	P50991	TCPD_HUMAN
183	12.59	12.59	52.38	47.62	35.71	sp|Q16778|H2B2E_HUMAN	Histone H2B type 2-E OS=Homo sapiens GN=HIST2H2BE PE=1 SV=3	HUMAN	22	sp	Q16778	H2B2E_HUMAN
184	12.53	12.53	40.23	35.63	33.72	sp|P30040|ERP29_HUMAN	Endoplasmic reticulum resident protein 29 OS=Homo sapiens GN=ERP29 PE=1 SV=4	HUMAN	8	sp	P30040	ERP29_HUMAN
185	12.36	12.36	79.41	74.51	60.78	sp|P61604|CH10_HUMAN	10 kDa heat shock protein, mitochondrial OS=Homo sapiens GN=HSPE1 PE=1 SV=2	HUMAN	7	sp	P61604	CH10_HUMAN
186	12.34	12.34	45.21	40.12	20.36	sp|P40925|MDHC_HUMAN	Malate dehydrogenase, cytoplasmic OS=Homo sapiens GN=MDH1 PE=1 SV=4	HUMAN	9	sp	P40925	MDHC_HUMAN
187	12.31	12.31	64.71	48.53	45.59	tr|E9PK25|E9PK25_HUMAN	Cofilin-1 OS=Homo sapiens GN=CFL1 PE=1 SV=1	HUMAN	12	tr	E9PK25	E9PK25_HUMAN
188	12.24	12.24	39.08	21.84	21.84	sp|Q14847|LASP1_HUMAN	LIM and SH3 domain protein 1 OS=Homo sapiens GN=LASP1 PE=1 SV=2	HUMAN	8	sp	Q14847	LASP1_HUMAN
189	12.21	12.67	32.43	18.85	14.94	sp|P30153|2AAA_HUMAN	Serine/threonine-protein phosphatase 2A 65 kDa regulatory subunit A alpha isoform OS=Homo sapiens GN=PPP2R1A PE=1 SV=4	HUMAN	8	sp	P30153	2AAA_HUMAN
190	12.04	12.04	46.89	43.57	38.17	sp|O00299|CLIC1_HUMAN	Chloride intracellular channel protein 1 OS=Homo sapiens GN=CLIC1 PE=1 SV=4	HUMAN	7	sp	O00299	CLIC1_HUMAN
191	12.03	12.03	31.41	22.78	22.78	tr|E7ES33|E7ES33_HUMAN	Septin-7 OS=Homo sapiens GN=SEPT7 PE=1 SV=3	HUMAN	8	tr	E7ES33	E7ES33_HUMAN
192	11.93	11.93	60.14	50	23.43	sp|P60174|TPIS_HUMAN	Triosephosphate isomerase OS=Homo sapiens GN=TPI1 PE=1 SV=3	HUMAN	6	sp	P60174	TPIS_HUMAN
193	11.91	12.04	42.9	37.22	33.12	sp|P05388|RLA0_HUMAN	60S acidic ribosomal protein P0 OS=Homo sapiens GN=RPLP0 PE=1 SV=1	HUMAN	8	sp	P05388	RLA0_HUMAN
194	11.9	11.91	26.1	14.62	9.421	sp|P12110|CO6A2_HUMAN	Collagen alpha-2(VI) chain OS=Homo sapiens GN=COL6A2 PE=1 SV=4	HUMAN	8	sp	P12110	CO6A2_HUMAN
195	11.86	11.91	39	31.82	23.21	sp|P36955|PEDF_HUMAN	Pigment epithelium-derived factor OS=Homo sapiens GN=SERPINF1 PE=1 SV=4	HUMAN	7	sp	P36955	PEDF_HUMAN
196	11.85	12.49	67.33	67.33	44.55	tr|C9JFR7|C9JFR7_HUMAN	Cytochrome c (Fragment) OS=Homo sapiens GN=CYCS PE=1 SV=1	HUMAN	7	tr	C9JFR7	C9JFR7_HUMAN
197	11.81	11.81	22.15	22.15	12.66	tr|K7EQ48|K7EQ48_HUMAN	Glucose-6-phosphate isomerase OS=Homo sapiens GN=GPI PE=1 SV=2	HUMAN	5	tr	K7EQ48	K7EQ48_HUMAN
198	11.69	11.69	29.61	25.24	25.24	sp|P07339|CATD_HUMAN	Cathepsin D OS=Homo sapiens GN=CTSD PE=1 SV=1	HUMAN	8	sp	P07339	CATD_HUMAN
199	11.68	11.68	39.15	39.15	36.6	tr|J3QQX2|J3QQX2_HUMAN	Rho GDP-dissociation inhibitor 1 OS=Homo sapiens GN=ARHGDIA PE=1 SV=1	HUMAN	9	tr	J3QQX2	J3QQX2_HUMAN
200	11.59	11.59	30.24	24.41	20.09	sp|P61978|HNRPK_HUMAN	Heterogeneous nuclear ribonucleoprotein K OS=Homo sapiens GN=HNRNPK PE=1 SV=1	HUMAN	7	sp	P61978	HNRPK_HUMAN
201	11.55	11.55	25.62	19.8	12.52	sp|P21980|TGM2_HUMAN	Protein-glutamine gamma-glutamyltransferase 2 OS=Homo sapiens GN=TGM2 PE=1 SV=2	HUMAN	5	sp	P21980	TGM2_HUMAN
202	11.53	11.53	17.74	7.929	4.618	sp|Q09666|AHNK_HUMAN	Neuroblast differentiation-associated protein AHNAK OS=Homo sapiens GN=AHNAK PE=1 SV=2	HUMAN	8	sp	Q09666	AHNK_HUMAN
203	11.53	11.53	25.96	15.91	14.74	sp|Q15046|SYK_HUMAN	Lysine--tRNA ligase OS=Homo sapiens GN=KARS PE=1 SV=3	HUMAN	7	sp	Q15046	SYK_HUMAN
204	11.52	11.52	25.68	17.91	14.86	sp|P31939|PUR9_HUMAN	Bifunctional purine biosynthesis protein PURH OS=Homo sapiens GN=ATIC PE=1 SV=3	HUMAN	6	sp	P31939	PUR9_HUMAN
205	11.46	36.23	39.79	34.31	29.16	sp|P35241|RADI_HUMAN	Radixin OS=Homo sapiens GN=RDX PE=1 SV=1	HUMAN	22	sp	P35241	RADI_HUMAN
206	11.41	11.41	63.87	48.74	38.66	tr|E5RJD8|E5RJD8_HUMAN	Tubulin-specific chaperone A OS=Homo sapiens GN=TBCA PE=1 SV=1	HUMAN	7	tr	E5RJD8	E5RJD8_HUMAN
207	11.41	11.41	26.64	23.6	17.76	sp|Q13838|DX39B_HUMAN	Spliceosome RNA helicase DDX39B OS=Homo sapiens GN=DDX39B PE=1 SV=1	HUMAN	6	sp	Q13838	DX39B_HUMAN
208	11.24	11.24	31.27	26.68	23.72	tr|Q5SRN5|Q5SRN5_HUMAN	HLA class I histocompatibility antigen, A-68 alpha chain OS=Homo sapiens GN=HLA-A PE=1 SV=2	HUMAN	8	tr	Q5SRN5	Q5SRN5_HUMAN
209	11.19	11.19	47.33	41	29.67	sp|O15144|ARPC2_HUMAN	Actin-related protein 2/3 complex subunit 2 OS=Homo sapiens GN=ARPC2 PE=1 SV=1	HUMAN	8	sp	O15144	ARPC2_HUMAN
210	11.18	11.18	37.68	25.6	23.43	sp|O75874|IDHC_HUMAN	Isocitrate dehydrogenase [NADP] cytoplasmic OS=Homo sapiens GN=IDH1 PE=1 SV=2	HUMAN	8	sp	O75874	IDHC_HUMAN
211	11.08	11.14	37.26	30.42	30.42	tr|C9J9K3|C9J9K3_HUMAN	40S ribosomal protein SA (Fragment) OS=Homo sapiens GN=RPSA PE=1 SV=4	HUMAN	6	tr	C9J9K3	C9J9K3_HUMAN
212	11.06	11.06	63.8	56.56	50.68	tr|D6RAF8|D6RAF8_HUMAN	Heterogeneous nuclear ribonucleoprotein D0 (Fragment) OS=Homo sapiens GN=HNRNPD PE=1 SV=1	HUMAN	8	tr	D6RAF8	D6RAF8_HUMAN
213	11.03	11.03	58.52	58.52	58.52	sp|P09382|LEG1_HUMAN	Galectin-1 OS=Homo sapiens GN=LGALS1 PE=1 SV=2	HUMAN	11	sp	P09382	LEG1_HUMAN
214	10.95	11.03	28.73	20.63	14.73	sp|Q99832|TCPH_HUMAN	T-complex protein 1 subunit eta OS=Homo sapiens GN=CCT7 PE=1 SV=2	HUMAN	7	sp	Q99832	TCPH_HUMAN
215	10.95	10.95	29.73	27.84	20.81	sp|Q9Y617|SERC_HUMAN	Phosphoserine aminotransferase OS=Homo sapiens GN=PSAT1 PE=1 SV=2	HUMAN	7	sp	Q9Y617	SERC_HUMAN
216	10.85	10.85	51.24	44.17	41.34	sp|P21796|VDAC1_HUMAN	Voltage-dependent anion-selective channel protein 1 OS=Homo sapiens GN=VDAC1 PE=1 SV=2	HUMAN	7	sp	P21796	VDAC1_HUMAN
217	10.82	10.82	22.69	17.5	16.05	sp|P38606|VATA_HUMAN	V-type proton ATPase catalytic subunit A OS=Homo sapiens GN=ATP6V1A PE=1 SV=2	HUMAN	6	sp	P38606	VATA_HUMAN
218	10.74	10.74	58.8	47.69	36.57	sp|P51148|RAB5C_HUMAN	Ras-related protein Rab-5C OS=Homo sapiens GN=RAB5C PE=1 SV=2	HUMAN	6	sp	P51148	RAB5C_HUMAN
219	10.66	10.69	44.4	40.25	31.12	sp|P28066|PSA5_HUMAN	Proteasome subunit alpha type-5 OS=Homo sapiens GN=PSMA5 PE=1 SV=3	HUMAN	7	sp	P28066	PSA5_HUMAN
220	10.58	10.58	48.1	39.52	36.67	tr|Q5T9B7|Q5T9B7_HUMAN	Adenylate kinase isoenzyme 1 OS=Homo sapiens GN=AK1 PE=1 SV=1	HUMAN	7	tr	Q5T9B7	Q5T9B7_HUMAN
221	10.57	10.62	7.776	5.399	4.606	tr|J3QSU6|J3QSU6_HUMAN	Tenascin OS=Homo sapiens GN=TNC PE=1 SV=1	HUMAN	7	tr	J3QSU6	J3QSU6_HUMAN
222	10.53	10.53	31.81	21.45	13.73	sp|P05120|PAI2_HUMAN	Plasminogen activator inhibitor 2 OS=Homo sapiens GN=SERPINB2 PE=1 SV=2	HUMAN	7	sp	P05120	PAI2_HUMAN
223	10.41	10.41	47.45	41.96	30.98	sp|P25788|PSA3_HUMAN	Proteasome subunit alpha type-3 OS=Homo sapiens GN=PSMA3 PE=1 SV=2	HUMAN	7	sp	P25788	PSA3_HUMAN
224	10.38	10.4	36.28	36.28	30.23	sp|O75396|SC22B_HUMAN	Vesicle-trafficking protein SEC22b OS=Homo sapiens GN=SEC22B PE=1 SV=4	HUMAN	6	sp	O75396	SC22B_HUMAN
225	10.36	14.88	42.8	39.11	39.11	sp|Q13162|PRDX4_HUMAN	Peroxiredoxin-4 OS=Homo sapiens GN=PRDX4 PE=1 SV=1	HUMAN	12	sp	Q13162	PRDX4_HUMAN
226	10.36	10.36	32.03	28.13	25.39	sp|P30048|PRDX3_HUMAN	Thioredoxin-dependent peroxide reductase, mitochondrial OS=Homo sapiens GN=PRDX3 PE=1 SV=3	HUMAN	6	sp	P30048	PRDX3_HUMAN
227	10.26	10.57	48.29	42.31	31.2	sp|P25787|PSA2_HUMAN	Proteasome subunit alpha type-2 OS=Homo sapiens GN=PSMA2 PE=1 SV=2	HUMAN	7	sp	P25787	PSA2_HUMAN
228	10.22	10.24	48.09	35.11	35.11	sp|Q96QV6|H2A1A_HUMAN	Histone H2A type 1-A OS=Homo sapiens GN=HIST1H2AA PE=1 SV=3	HUMAN	9	sp	Q96QV6	H2A1A_HUMAN
229	10.22	10.22	28.97	20.66	12.55	sp|O95394|AGM1_HUMAN	Phosphoacetylglucosamine mutase OS=Homo sapiens GN=PGM3 PE=1 SV=1	HUMAN	5	sp	O95394	AGM1_HUMAN
230	10.19	10.2	36.9	35.29	35.29	sp|P30086|PEBP1_HUMAN	Phosphatidylethanolamine-binding protein 1 OS=Homo sapiens GN=PEBP1 PE=1 SV=3	HUMAN	7	sp	P30086	PEBP1_HUMAN
231	10.08	10.12	18.23	6.454	5.957	tr|A0A0A0MRV0|A0A0A0MRV0_HUMAN	Ribosome-binding protein 1 OS=Homo sapiens GN=RRBP1 PE=1 SV=1	HUMAN	7	tr	A0A0A0MRV0	A0A0A0MRV0_HUMAN
232	10.06	10.34	19.74	10.58	8.397	sp|P19367|HXK1_HUMAN	Hexokinase-1 OS=Homo sapiens GN=HK1 PE=1 SV=3	HUMAN	7	sp	P19367	HXK1_HUMAN
233	9.97	10.33	13.9	7.273	5.561	tr|Q5T985|Q5T985_HUMAN	Inter-alpha-trypsin inhibitor heavy chain H2 OS=Homo sapiens GN=ITIH2 PE=1 SV=1	HUMAN	5	tr	Q5T985	Q5T985_HUMAN
234	9.92	9.92	43.11	22.24	16.93	sp|Q16851|UGPA_HUMAN	UTP--glucose-1-phosphate uridylyltransferase OS=Homo sapiens GN=UGP2 PE=1 SV=5	HUMAN	5	sp	Q16851	UGPA_HUMAN
235	9.91	9.91	19.18	11.01	8.491	sp|P11940|PABP1_HUMAN	Polyadenylate-binding protein 1 OS=Homo sapiens GN=PABPC1 PE=1 SV=2	HUMAN	5	sp	P11940	PABP1_HUMAN
236	9.9	9.9	40.78	33.33	25.89	tr|A0A0A0MR02|A0A0A0MR02_HUMAN	Voltage-dependent anion-selective channel protein 2 (Fragment) OS=Homo sapiens GN=VDAC2 PE=1 SV=1	HUMAN	5	tr	A0A0A0MR02	A0A0A0MR02_HUMAN
237	9.88	9.9	37.44	29.22	26.94	sp|P49755|TMEDA_HUMAN	Transmembrane emp24 domain-containing protein 10 OS=Homo sapiens GN=TMED10 PE=1 SV=2	HUMAN	5	sp	P49755	TMEDA_HUMAN
238	9.77	9.77	29.3	26.05	26.05	sp|P09429|HMGB1_HUMAN	High mobility group protein B1 OS=Homo sapiens GN=HMGB1 PE=1 SV=3	HUMAN	6	sp	P09429	HMGB1_HUMAN
239	9.73	9.82	52.27	32.58	27.27	sp|P28070|PSB4_HUMAN	Proteasome subunit beta type-4 OS=Homo sapiens GN=PSMB4 PE=1 SV=4	HUMAN	7	sp	P28070	PSB4_HUMAN
240	9.72	9.73	22.79	16.67	12.68	sp|Q04446|GLGB_HUMAN	1,4-alpha-glucan-branching enzyme OS=Homo sapiens GN=GBE1 PE=1 SV=3	HUMAN	6	sp	Q04446	GLGB_HUMAN
241	9.68	9.68	14.44	11.99	10.35	sp|P02765|FETUA_HUMAN	Alpha-2-HS-glycoprotein OS=Homo sapiens GN=AHSG PE=1 SV=1	HUMAN	23	sp	P02765	FETUA_HUMAN
242	9.66	9.66	61.9	56.19	56.19	sp|P31949|S10AB_HUMAN	Protein S100-A11 OS=Homo sapiens GN=S100A11 PE=1 SV=2	HUMAN	9	sp	P31949	S10AB_HUMAN
243	9.64	13.19	41.37	32.23	30.71	sp|P61160|ARP2_HUMAN	Actin-related protein 2 OS=Homo sapiens GN=ACTR2 PE=1 SV=1	HUMAN	11	sp	P61160	ARP2_HUMAN
244	9.64	9.64	32.81	21.45	16.4	sp|P63244|GBLP_HUMAN	Guanine nucleotide-binding protein subunit beta-2-like 1 OS=Homo sapiens GN=GNB2L1 PE=1 SV=3	HUMAN	5	sp	P63244	GBLP_HUMAN
245	9.61	9.61	42.07	32.41	25.52	sp|P39019|RS19_HUMAN	40S ribosomal protein S19 OS=Homo sapiens GN=RPS19 PE=1 SV=2	HUMAN	6	sp	P39019	RS19_HUMAN
246	9.6	19.83	60.57	57.72	52.03	sp|P31946|1433B_HUMAN	14-3-3 protein beta/alpha OS=Homo sapiens GN=YWHAB PE=1 SV=3	HUMAN	14	sp	P31946	1433B_HUMAN
247	9.6	9.6	29.67	22.53	19.23	sp|P55145|MANF_HUMAN	Mesencephalic astrocyte-derived neurotrophic factor OS=Homo sapiens GN=MANF PE=1 SV=3	HUMAN	7	sp	P55145	MANF_HUMAN
248	9.59	9.6	47.18	36.69	22.98	sp|P18124|RL7_HUMAN	60S ribosomal protein L7 OS=Homo sapiens GN=RPL7 PE=1 SV=1	HUMAN	5	sp	P18124	RL7_HUMAN
249	9.59	9.59	38.64	21.82	15.91	sp|P16035|TIMP2_HUMAN	Metalloproteinase inhibitor 2 OS=Homo sapiens GN=TIMP2 PE=1 SV=2	HUMAN	6	sp	P16035	TIMP2_HUMAN
250	9.58	9.58	50.54	41.52	41.52	sp|P16152|CBR1_HUMAN	Carbonyl reductase [NADPH] 1 OS=Homo sapiens GN=CBR1 PE=1 SV=3	HUMAN	7	sp	P16152	CBR1_HUMAN
251	9.55	9.55	14.53	13.02	11.5	sp|P13489|RINI_HUMAN	Ribonuclease inhibitor OS=Homo sapiens GN=RNH1 PE=1 SV=2	HUMAN	5	sp	P13489	RINI_HUMAN
252	9.54	9.54	32.54	28.97	28.57	tr|G3V5Z7|G3V5Z7_HUMAN	Proteasome subunit alpha type OS=Homo sapiens GN=PSMA6 PE=1 SV=1	HUMAN	6	tr	G3V5Z7	G3V5Z7_HUMAN
253	9.53	9.53	42.13	27.16	19.29	tr|A0A0B4J2A4|A0A0B4J2A4_HUMAN	3-ketoacyl-CoA thiolase, mitochondrial OS=Homo sapiens GN=ACAA2 PE=4 SV=1	HUMAN	6	tr	A0A0B4J2A4	A0A0B4J2A4_HUMAN
254	9.49	9.49	48.06	36.82	32.17	sp|O95336|6PGL_HUMAN	6-phosphogluconolactonase OS=Homo sapiens GN=PGLS PE=1 SV=2	HUMAN	5	sp	O95336	6PGL_HUMAN
255	9.45	9.97	32.27	28.78	26.74	sp|Q9UJ70|NAGK_HUMAN	N-acetyl-D-glucosamine kinase OS=Homo sapiens GN=NAGK PE=1 SV=4	HUMAN	6	sp	Q9UJ70	NAGK_HUMAN
256	9.44	21.68	42.83	33.86	33.86	sp|Q9BUF5|TBB6_HUMAN	Tubulin beta-6 chain OS=Homo sapiens GN=TUBB6 PE=1 SV=1	HUMAN	16	sp	Q9BUF5	TBB6_HUMAN
257	9.42	9.97	48.7	40.26	37.01	sp|P68036|UB2L3_HUMAN	Ubiquitin-conjugating enzyme E2 L3 OS=Homo sapiens GN=UBE2L3 PE=1 SV=1	HUMAN	5	sp	P68036	UB2L3_HUMAN
258	9.4	9.4	42.78	31.96	19.07	sp|P46781|RS9_HUMAN	40S ribosomal protein S9 OS=Homo sapiens GN=RPS9 PE=1 SV=3	HUMAN	6	sp	P46781	RS9_HUMAN
259	9.33	9.33	16.12	14.13	10.51	tr|B0YIW6|B0YIW6_HUMAN	Archain 1, isoform CRA_a OS=Homo sapiens GN=ARCN1 PE=1 SV=1	HUMAN	6	tr	B0YIW6	B0YIW6_HUMAN
260	9.25	9.27	18.67	14.66	9.649	sp|P05556|ITB1_HUMAN	Integrin beta-1 OS=Homo sapiens GN=ITGB1 PE=1 SV=2	HUMAN	5	sp	P05556	ITB1_HUMAN
261	9.25	9.25	25.45	15.82	10.73	sp|Q02809|PLOD1_HUMAN	Procollagen-lysine,2-oxoglutarate 5-dioxygenase 1 OS=Homo sapiens GN=PLOD1 PE=1 SV=2	HUMAN	6	sp	Q02809	PLOD1_HUMAN
262	9.25	9.25	55.07	40.1	28.02	sp|P51149|RAB7A_HUMAN	Ras-related protein Rab-7a OS=Homo sapiens GN=RAB7A PE=1 SV=1	HUMAN	5	sp	P51149	RAB7A_HUMAN
263	9.22	10.48	25.52	16.85	10.27	sp|O60506|HNRPQ_HUMAN	Heterogeneous nuclear ribonucleoprotein Q OS=Homo sapiens GN=SYNCRIP PE=1 SV=2	HUMAN	6	sp	O60506	HNRPQ_HUMAN
264	9.14	9.14	16.78	10.16	9.132	sp|Q14974|IMB1_HUMAN	Importin subunit beta-1 OS=Homo sapiens GN=KPNB1 PE=1 SV=2	HUMAN	6	sp	Q14974	IMB1_HUMAN
265	9.13	9.13	15.63	11.82	6.522	sp|Q32P28|P3H1_HUMAN	Prolyl 3-hydroxylase 1 OS=Homo sapiens GN=LEPRE1 PE=1 SV=2	HUMAN	4	sp	Q32P28	P3H1_HUMAN
266	9.09	9.09	34.33	31.33	31.33	tr|B5MDF5|B5MDF5_HUMAN	GTP-binding nuclear protein Ran OS=Homo sapiens GN=RAN PE=1 SV=1	HUMAN	7	tr	B5MDF5	B5MDF5_HUMAN
267	9.06	9.07	51.34	34.9	23.49	tr|J3KPX7|J3KPX7_HUMAN	Prohibitin-2 OS=Homo sapiens GN=PHB2 PE=1 SV=2	HUMAN	5	tr	J3KPX7	J3KPX7_HUMAN
268	9.04	9.07	61.3	39.08	33.72	sp|P12004|PCNA_HUMAN	Proliferating cell nuclear antigen OS=Homo sapiens GN=PCNA PE=1 SV=1	HUMAN	8	sp	P12004	PCNA_HUMAN
269	9.02	9.02	34.47	34.47	34.47	sp|P30043|BLVRB_HUMAN	Flavin reductase (NADPH) OS=Homo sapiens GN=BLVRB PE=1 SV=3	HUMAN	7	sp	P30043	BLVRB_HUMAN
270	9	9	46.67	45.56	37.22	sp|P18085|ARF4_HUMAN	ADP-ribosylation factor 4 OS=Homo sapiens GN=ARF4 PE=1 SV=3	HUMAN	7	sp	P18085	ARF4_HUMAN
271	8.98	8.98	32.03	25.05	16.99	sp|Q02790|FKBP4_HUMAN	Peptidyl-prolyl cis-trans isomerase FKBP4 OS=Homo sapiens GN=FKBP4 PE=1 SV=3	HUMAN	5	sp	Q02790	FKBP4_HUMAN
272	8.95	8.95	44.44	44.44	28.5	tr|D6RE83|D6RE83_HUMAN	Ubiquitin carboxyl-terminal hydrolase OS=Homo sapiens GN=UCHL1 PE=1 SV=1	HUMAN	6	tr	D6RE83	D6RE83_HUMAN
273	8.87	8.87	59.86	44.37	29.58	sp|Q14019|COTL1_HUMAN	Coactosin-like protein OS=Homo sapiens GN=COTL1 PE=1 SV=3	HUMAN	5	sp	Q14019	COTL1_HUMAN
274	8.86	8.86	67.32	49.27	41.46	sp|P62820|RAB1A_HUMAN	Ras-related protein Rab-1A OS=Homo sapiens GN=RAB1A PE=1 SV=3	HUMAN	7	sp	P62820	RAB1A_HUMAN
275	8.82	8.82	41.99	27.76	27.76	tr|K7ER96|K7ER96_HUMAN	Thioredoxin-like protein 1 (Fragment) OS=Homo sapiens GN=TXNL1 PE=1 SV=1	HUMAN	6	tr	K7ER96	K7ER96_HUMAN
276	8.78	8.78	14.39	10	6.93	sp|Q16531|DDB1_HUMAN	DNA damage-binding protein 1 OS=Homo sapiens GN=DDB1 PE=1 SV=1	HUMAN	6	sp	Q16531	DDB1_HUMAN
277	8.76	8.76	44.87	34.6	34.6	tr|G3V3M6|G3V3M6_HUMAN	DNA-(apurinic or apyrimidinic site) lyase (Fragment) OS=Homo sapiens GN=APEX1 PE=1 SV=1	HUMAN	12	tr	G3V3M6	G3V3M6_HUMAN
278	8.65	8.65	34.01	24.92	20.54	sp|P46777|RL5_HUMAN	60S ribosomal protein L5 OS=Homo sapiens GN=RPL5 PE=1 SV=3	HUMAN	7	sp	P46777	RL5_HUMAN
279	8.62	8.62	20.42	15.21	15.21	sp|Q92743|HTRA1_HUMAN	Serine protease HTRA1 OS=Homo sapiens GN=HTRA1 PE=1 SV=1	HUMAN	5	sp	Q92743	HTRA1_HUMAN
280	8.59	8.88	17.92	15.23	15.23	sp|P00367|DHE3_HUMAN	Glutamate dehydrogenase 1, mitochondrial OS=Homo sapiens GN=GLUD1 PE=1 SV=2	HUMAN	8	sp	P00367	DHE3_HUMAN
281	8.58	8.58	37.57	28.11	18.05	sp|P51884|LUM_HUMAN	Lumican OS=Homo sapiens GN=LUM PE=1 SV=2	HUMAN	5	sp	P51884	LUM_HUMAN
282	8.55	8.58	10.55	4.176	1.83	sp|Q14204|DYHC1_HUMAN	Cytoplasmic dynein 1 heavy chain 1 OS=Homo sapiens GN=DYNC1H1 PE=1 SV=5	HUMAN	5	sp	Q14204	DYHC1_HUMAN
283	8.51	8.51	28.06	28.06	26.09	tr|H3BUI0|H3BUI0_HUMAN	IST1 homolog (Fragment) OS=Homo sapiens GN=IST1 PE=1 SV=1	HUMAN	6	tr	H3BUI0	H3BUI0_HUMAN
284	8.47	8.82	17.81	10.96	6.112	sp|Q10567|AP1B1_HUMAN	AP-1 complex subunit beta-1 OS=Homo sapiens GN=AP1B1 PE=1 SV=2	HUMAN	4	sp	Q10567	AP1B1_HUMAN
285	8.46	8.46	39.44	34.51	34.51	sp|P69905|HBA_HUMAN	Hemoglobin subunit alpha OS=Homo sapiens GN=HBA1 PE=1 SV=2	HUMAN	6	sp	P69905	HBA_HUMAN
286	8.44	10.82	34.45	26.52	26.52	sp|Q96D15|RCN3_HUMAN	Reticulocalbin-3 OS=Homo sapiens GN=RCN3 PE=1 SV=1	HUMAN	9	sp	Q96D15	RCN3_HUMAN
287	8.43	8.44	30.87	24.54	21.9	sp|P30740|ILEU_HUMAN	Leukocyte elastase inhibitor OS=Homo sapiens GN=SERPINB1 PE=1 SV=1	HUMAN	6	sp	P30740	ILEU_HUMAN
288	8.41	8.41	39.07	32.45	31.79	sp|P62263|RS14_HUMAN	40S ribosomal protein S14 OS=Homo sapiens GN=RPS14 PE=1 SV=3	HUMAN	4	sp	P62263	RS14_HUMAN
289	8.38	8.38	31.83	21.13	16.34	sp|P04899|GNAI2_HUMAN	Guanine nucleotide-binding protein G(i) subunit alpha-2 OS=Homo sapiens GN=GNAI2 PE=1 SV=3	HUMAN	5	sp	P04899	GNAI2_HUMAN
290	8.36	8.36	27.85	22.81	15.35	sp|Q9Y265|RUVB1_HUMAN	RuvB-like 1 OS=Homo sapiens GN=RUVBL1 PE=1 SV=1	HUMAN	4	sp	Q9Y265	RUVB1_HUMAN
291	8.34	8.34	24.05	11.14	7.337	tr|F5H365|F5H365_HUMAN	Protein transport protein Sec23A OS=Homo sapiens GN=SEC23A PE=1 SV=1	HUMAN	5	tr	F5H365	F5H365_HUMAN
292	8.33	8.38	23.6	15.17	13.11	sp|O43242|PSMD3_HUMAN	26S proteasome non-ATPase regulatory subunit 3 OS=Homo sapiens GN=PSMD3 PE=1 SV=2	HUMAN	5	sp	O43242	PSMD3_HUMAN
293	8.33	8.34	10.56	7.2	6.72	tr|A0A0A6YYG9|A0A0A6YYG9_HUMAN	Protein ARPC4-TTLL3 OS=Homo sapiens GN=ARPC4-TTLL3 PE=1 SV=1	HUMAN	4	tr	A0A0A6YYG9	A0A0A6YYG9_HUMAN
294	8.31	8.35	31.45	22.41	15.82	sp|P26599|PTBP1_HUMAN	Polypyrimidine tract-binding protein 1 OS=Homo sapiens GN=PTBP1 PE=1 SV=1	HUMAN	5	sp	P26599	PTBP1_HUMAN
295	8.24	8.24	25.08	15.23	7.055	sp|Q14764|MVP_HUMAN	Major vault protein OS=Homo sapiens GN=MVP PE=1 SV=4	HUMAN	4	sp	Q14764	MVP_HUMAN
296	8.24	8.24	18.08	9.775	8.016	sp|P05023|AT1A1_HUMAN	Sodium/potassium-transporting ATPase subunit alpha-1 OS=Homo sapiens GN=ATP1A1 PE=1 SV=1	HUMAN	5	sp	P05023	AT1A1_HUMAN
297	8.2	9.05	13.22	10.7	9.955	sp|Q6EMK4|VASN_HUMAN	Vasorin OS=Homo sapiens GN=VASN PE=1 SV=1	HUMAN	5	sp	Q6EMK4	VASN_HUMAN
298	8.2	8.2	82.61	76.52	69.57	sp|P05387|RLA2_HUMAN	60S acidic ribosomal protein P2 OS=Homo sapiens GN=RPLP2 PE=1 SV=1	HUMAN	4	sp	P05387	RLA2_HUMAN
299	8.18	8.18	16.32	12.52	9.192	tr|J3KPF3|J3KPF3_HUMAN	4F2 cell-surface antigen heavy chain OS=Homo sapiens GN=SLC3A2 PE=1 SV=1	HUMAN	4	tr	J3KPF3	J3KPF3_HUMAN
300	8.15	8.36	31.85	21.23	16.35	sp|P23381|SYWC_HUMAN	Tryptophan--tRNA ligase, cytoplasmic OS=Homo sapiens GN=WARS PE=1 SV=2	HUMAN	4	sp	P23381	SYWC_HUMAN
301	8.12	8.14	46.2	26.63	26.09	sp|P62834|RAP1A_HUMAN	Ras-related protein Rap-1A OS=Homo sapiens GN=RAP1A PE=1 SV=1	HUMAN	4	sp	P62834	RAP1A_HUMAN
302	8.12	8.12	25.75	22.39	18.66	sp|Q15691|MARE1_HUMAN	Microtubule-associated protein RP/EB family member 1 OS=Homo sapiens GN=MAPRE1 PE=1 SV=3	HUMAN	4	sp	Q15691	MARE1_HUMAN
303	8.12	8.12	35.05	30.84	30.84	sp|P30044|PRDX5_HUMAN	Peroxiredoxin-5, mitochondrial OS=Homo sapiens GN=PRDX5 PE=1 SV=4	HUMAN	5	sp	P30044	PRDX5_HUMAN
304	8.11	8.11	54.55	47.27	43.03	sp|P30050|RL12_HUMAN	60S ribosomal protein L12 OS=Homo sapiens GN=RPL12 PE=1 SV=1	HUMAN	6	sp	P30050	RL12_HUMAN
305	8.09	8.09	17.51	17.51	12.04	sp|Q9NR12|PDLI7_HUMAN	PDZ and LIM domain protein 7 OS=Homo sapiens GN=PDLIM7 PE=1 SV=1	HUMAN	5	sp	Q9NR12	PDLI7_HUMAN
306	8.07	8.07	46.77	40.3	31.34	sp|P49721|PSB2_HUMAN	Proteasome subunit beta type-2 OS=Homo sapiens GN=PSMB2 PE=1 SV=1	HUMAN	6	sp	P49721	PSB2_HUMAN
307	8.04	8.04	18.39	11.3	8.429	sp|Q16222|UAP1_HUMAN	UDP-N-acetylhexosamine pyrophosphorylase OS=Homo sapiens GN=UAP1 PE=1 SV=3	HUMAN	4	sp	Q16222	UAP1_HUMAN
308	8	8	47.27	23.64	23.64	sp|P46783|RS10_HUMAN	40S ribosomal protein S10 OS=Homo sapiens GN=RPS10 PE=1 SV=1	HUMAN	4	sp	P46783	RS10_HUMAN
309	8	8	39.44	39.44	39.44	sp|P26885|FKBP2_HUMAN	Peptidyl-prolyl cis-trans isomerase FKBP2 OS=Homo sapiens GN=FKBP2 PE=1 SV=2	HUMAN	4	sp	P26885	FKBP2_HUMAN
310	7.95	7.95	28.45	24.69	20.92	sp|P28072|PSB6_HUMAN	Proteasome subunit beta type-6 OS=Homo sapiens GN=PSMB6 PE=1 SV=4	HUMAN	4	sp	P28072	PSB6_HUMAN
311	7.92	8.97	60.47	35.18	32.81	sp|Q9Y696|CLIC4_HUMAN	Chloride intracellular channel protein 4 OS=Homo sapiens GN=CLIC4 PE=1 SV=4	HUMAN	8	sp	Q9Y696	CLIC4_HUMAN
312	7.9	7.98	36.32	31.39	27.35	tr|E9PGT1|E9PGT1_HUMAN	Translin OS=Homo sapiens GN=TSN PE=1 SV=1	HUMAN	5	tr	E9PGT1	E9PGT1_HUMAN
313	7.89	7.89	38.55	31.33	18.07	sp|Q06323|PSME1_HUMAN	Proteasome activator complex subunit 1 OS=Homo sapiens GN=PSME1 PE=1 SV=1	HUMAN	4	sp	Q06323	PSME1_HUMAN
314	7.88	7.88	20.17	14	7.117	sp|P11216|PYGB_HUMAN	Glycogen phosphorylase, brain form OS=Homo sapiens GN=PYGB PE=1 SV=5	HUMAN	4	sp	P11216	PYGB_HUMAN
315	7.87	9.12	41.07	24.14	21.94	sp|P09525|ANXA4_HUMAN	Annexin A4 OS=Homo sapiens GN=ANXA4 PE=1 SV=4	HUMAN	6	sp	P09525	ANXA4_HUMAN
316	7.83	7.83	36.8	27.2	24.4	sp|P17931|LEG3_HUMAN	Galectin-3 OS=Homo sapiens GN=LGALS3 PE=1 SV=5	HUMAN	7	sp	P17931	LEG3_HUMAN
317	7.81	7.81	18.05	13.79	8.925	sp|P55058|PLTP_HUMAN	Phospholipid transfer protein OS=Homo sapiens GN=PLTP PE=1 SV=1	HUMAN	4	sp	P55058	PLTP_HUMAN
318	7.74	7.74	20.11	15.49	13.04	sp|P21810|PGS1_HUMAN	Biglycan OS=Homo sapiens GN=BGN PE=1 SV=2	HUMAN	4	sp	P21810	PGS1_HUMAN
319	7.72	7.72	20.19	12.78	8.333	sp|Q16610|ECM1_HUMAN	Extracellular matrix protein 1 OS=Homo sapiens GN=ECM1 PE=1 SV=2	HUMAN	4	sp	Q16610	ECM1_HUMAN
320	7.72	7.72	48.29	39.51	35.12	sp|P49720|PSB3_HUMAN	Proteasome subunit beta type-3 OS=Homo sapiens GN=PSMB3 PE=1 SV=2	HUMAN	6	sp	P49720	PSB3_HUMAN
321	7.69	7.69	20.64	13.76	11.07	sp|Q96HC4|PDLI5_HUMAN	PDZ and LIM domain protein 5 OS=Homo sapiens GN=PDLIM5 PE=1 SV=5	HUMAN	5	sp	Q96HC4	PDLI5_HUMAN
322	7.61	7.62	25.91	12.41	10.95	sp|O43776|SYNC_HUMAN	Asparagine--tRNA ligase, cytoplasmic OS=Homo sapiens GN=NARS PE=1 SV=1	HUMAN	4	sp	O43776	SYNC_HUMAN
323	7.57	7.59	14.41	9.134	5.669	sp|Q08211|DHX9_HUMAN	ATP-dependent RNA helicase A OS=Homo sapiens GN=DHX9 PE=1 SV=4	HUMAN	5	sp	Q08211	DHX9_HUMAN
324	7.56	7.66	7.494	3.23	2.153	sp|Q6UVK1|CSPG4_HUMAN	Chondroitin sulfate proteoglycan 4 OS=Homo sapiens GN=CSPG4 PE=1 SV=2	HUMAN	4	sp	Q6UVK1	CSPG4_HUMAN
325	7.51	7.53	43.15	26.61	15.32	sp|Q07955|SRSF1_HUMAN	Serine/arginine-rich splicing factor 1 OS=Homo sapiens GN=SRSF1 PE=1 SV=2	HUMAN	5	sp	Q07955	SRSF1_HUMAN
326	7.47	7.49	44.32	28.03	23.11	sp|P61247|RS3A_HUMAN	40S ribosomal protein S3a OS=Homo sapiens GN=RPS3A PE=1 SV=2	HUMAN	5	sp	P61247	RS3A_HUMAN
327	7.47	7.47	35.52	15.38	8.511	sp|P09960|LKHA4_HUMAN	Leukotriene A-4 hydrolase OS=Homo sapiens GN=LTA4H PE=1 SV=2	HUMAN	4	sp	P09960	LKHA4_HUMAN
328	7.47	7.47	23.18	23.18	18.18	tr|H0YMZ1|H0YMZ1_HUMAN	Proteasome subunit alpha type (Fragment) OS=Homo sapiens GN=PSMA4 PE=1 SV=4	HUMAN	4	tr	H0YMZ1	H0YMZ1_HUMAN
329	7.46	7.47	24.7	19.82	14.33	sp|O43684|BUB3_HUMAN	Mitotic checkpoint protein BUB3 OS=Homo sapiens GN=BUB3 PE=1 SV=1	HUMAN	4	sp	O43684	BUB3_HUMAN
330	7.41	7.42	55.4	30.99	20.66	sp|P48047|ATPO_HUMAN	ATP synthase subunit O, mitochondrial OS=Homo sapiens GN=ATP5O PE=1 SV=1	HUMAN	4	sp	P48047	ATPO_HUMAN
331	7.39	7.63	28.02	21.85	18.25	sp|Q15008|PSMD6_HUMAN	26S proteasome non-ATPase regulatory subunit 6 OS=Homo sapiens GN=PSMD6 PE=1 SV=1	HUMAN	5	sp	Q15008	PSMD6_HUMAN
332	7.38	7.58	35.09	32.89	25.44	sp|Q9HB71|CYBP_HUMAN	Calcyclin-binding protein OS=Homo sapiens GN=CACYBP PE=1 SV=2	HUMAN	4	sp	Q9HB71	CYBP_HUMAN
333	7.32	7.36	18.07	10.49	5.828	sp|Q92598|HS105_HUMAN	Heat shock protein 105 kDa OS=Homo sapiens GN=HSPH1 PE=1 SV=1	HUMAN	3	sp	Q92598	HS105_HUMAN
334	7.32	7.32	21.91	20.51	18.26	sp|Q15365|PCBP1_HUMAN	Poly(rC)-binding protein 1 OS=Homo sapiens GN=PCBP1 PE=1 SV=2	HUMAN	4	sp	Q15365	PCBP1_HUMAN
335	7.27	7.71	40.57	31.56	15.98	sp|Q9Y224|CN166_HUMAN	UPF0568 protein C14orf166 OS=Homo sapiens GN=C14orf166 PE=1 SV=1	HUMAN	3	sp	Q9Y224	CN166_HUMAN
336	7.26	9.84	33.92	31.82	25.52	sp|P47755|CAZA2_HUMAN	F-actin-capping protein subunit alpha-2 OS=Homo sapiens GN=CAPZA2 PE=1 SV=3	HUMAN	6	sp	P47755	CAZA2_HUMAN
337	7.21	7.21	50.52	41.18	24.91	sp|P00491|PNPH_HUMAN	Purine nucleoside phosphorylase OS=Homo sapiens GN=PNP PE=1 SV=2	HUMAN	6	sp	P00491	PNPH_HUMAN
338	7.2	7.21	47.45	32.14	25.51	sp|P30085|KCY_HUMAN	UMP-CMP kinase OS=Homo sapiens GN=CMPK1 PE=1 SV=3	HUMAN	4	sp	P30085	KCY_HUMAN
339	7.14	7.17	15.93	14.82	14.82	sp|P49411|EFTU_HUMAN	Elongation factor Tu, mitochondrial OS=Homo sapiens GN=TUFM PE=1 SV=2	HUMAN	5	sp	P49411	EFTU_HUMAN
340	7.13	7.13	18.54	13.79	9.826	sp|P04844|RPN2_HUMAN	Dolichyl-diphosphooligosaccharide--protein glycosyltransferase subunit 2 OS=Homo sapiens GN=RPN2 PE=1 SV=3	HUMAN	4	sp	P04844	RPN2_HUMAN
341	7.12	7.12	33.57	29.96	18.05	sp|Q99436|PSB7_HUMAN	Proteasome subunit beta type-7 OS=Homo sapiens GN=PSMB7 PE=1 SV=1	HUMAN	4	sp	Q99436	PSB7_HUMAN
342	7.11	7.11	13.68	8.446	8.446	sp|P27824|CALX_HUMAN	Calnexin OS=Homo sapiens GN=CANX PE=1 SV=2	HUMAN	4	sp	P27824	CALX_HUMAN
343	7.11	7.11	25.4	25.4	25.4	tr|M0QYN0|M0QYN0_HUMAN	UPF0556 protein C19orf10 OS=Homo sapiens GN=C19orf10 PE=1 SV=1	HUMAN	5	tr	M0QYN0	M0QYN0_HUMAN
344	7.08	7.08	23.23	17.77	12.07	sp|Q07960|RHG01_HUMAN	Rho GTPase-activating protein 1 OS=Homo sapiens GN=ARHGAP1 PE=1 SV=1	HUMAN	3	sp	Q07960	RHG01_HUMAN
345	7.03	7.03	25.12	16.13	12.9	sp|O60664|PLIN3_HUMAN	Perilipin-3 OS=Homo sapiens GN=PLIN3 PE=1 SV=3	HUMAN	4	sp	O60664	PLIN3_HUMAN
346	7.02	7.02	23.02	13.92	6.873	sp|P50281|MMP14_HUMAN	Matrix metalloproteinase-14 OS=Homo sapiens GN=MMP14 PE=1 SV=3	HUMAN	4	sp	P50281	MMP14_HUMAN
347	6.99	7.68	17.5	13.06	8.178	tr|E9PRY8|E9PRY8_HUMAN	Elongation factor 1-delta OS=Homo sapiens GN=EEF1D PE=1 SV=1	HUMAN	4	tr	E9PRY8	E9PRY8_HUMAN
348	6.99	7.06	78.69	77.38	49.84	tr|Q96C32|Q96C32_HUMAN	Polyubiquitin-C OS=Homo sapiens GN=UBC PE=1 SV=1	HUMAN	3	tr	Q96C32	Q96C32_HUMAN
349	6.97	6.97	39.2	30.23	21.93	tr|B1AK88|B1AK88_HUMAN	Capping protein (Actin filament) muscle Z-line, beta, isoform CRA_d OS=Homo sapiens GN=CAPZB PE=1 SV=1	HUMAN	5	tr	B1AK88	B1AK88_HUMAN
350	6.96	6.99	27.08	18.77	13.23	sp|Q96CX2|KCD12_HUMAN	BTB/POZ domain-containing protein KCTD12 OS=Homo sapiens GN=KCTD12 PE=1 SV=1	HUMAN	4	sp	Q96CX2	KCD12_HUMAN
351	6.93	6.93	29.7	17.26	12.94	sp|Q9UQ80|PA2G4_HUMAN	Proliferation-associated protein 2G4 OS=Homo sapiens GN=PA2G4 PE=1 SV=3	HUMAN	5	sp	Q9UQ80	PA2G4_HUMAN
352	6.93	6.93	14.86	13	13	tr|A0A0A6YY95|A0A0A6YY95_HUMAN	C-type lectin domain family 11 member A OS=Homo sapiens GN=CLEC11A PE=1 SV=1	HUMAN	4	tr	A0A0A6YY95	A0A0A6YY95_HUMAN
353	6.87	6.93	22.9	14.65	7.966	tr|E7ETU9|E7ETU9_HUMAN	Procollagen-lysine,2-oxoglutarate 5-dioxygenase 2 OS=Homo sapiens GN=PLOD2 PE=1 SV=1	HUMAN	4	tr	E7ETU9	E7ETU9_HUMAN
354	6.86	6.86	30.07	23.43	23.43	tr|H7BY58|H7BY58_HUMAN	Protein-L-isoaspartate O-methyltransferase OS=Homo sapiens GN=PCMT1 PE=1 SV=1	HUMAN	5	tr	H7BY58	H7BY58_HUMAN
355	6.84	6.84	17.26	7.214	7.214	sp|P23246|SFPQ_HUMAN	Splicing factor, proline- and glutamine-rich OS=Homo sapiens GN=SFPQ PE=1 SV=2	HUMAN	4	sp	P23246	SFPQ_HUMAN
356	6.83	6.83	45.64	25.73	13.69	sp|P78417|GSTO1_HUMAN	Glutathione S-transferase omega-1 OS=Homo sapiens GN=GSTO1 PE=1 SV=2	HUMAN	3	sp	P78417	GSTO1_HUMAN
357	6.83	6.83	27.44	25.19	13.53	sp|P62424|RL7A_HUMAN	60S ribosomal protein L7a OS=Homo sapiens GN=RPL7A PE=1 SV=2	HUMAN	3	sp	P62424	RL7A_HUMAN
358	6.8	6.81	35.02	29.6	18.41	sp|Q15404|RSU1_HUMAN	Ras suppressor protein 1 OS=Homo sapiens GN=RSU1 PE=1 SV=3	HUMAN	4	sp	Q15404	RSU1_HUMAN
359	6.78	6.8	37.01	23.58	16.12	sp|O76003|GLRX3_HUMAN	Glutaredoxin-3 OS=Homo sapiens GN=GLRX3 PE=1 SV=2	HUMAN	4	sp	O76003	GLRX3_HUMAN
360	6.77	6.78	39.47	24.74	21.84	sp|O00154|BACH_HUMAN	Cytosolic acyl coenzyme A thioester hydrolase OS=Homo sapiens GN=ACOT7 PE=1 SV=3	HUMAN	6	sp	O00154	BACH_HUMAN
361	6.74	9.8	38.07	23.86	11.75	sp|Q14195|DPYL3_HUMAN	Dihydropyrimidinase-related protein 3 OS=Homo sapiens GN=DPYSL3 PE=1 SV=1	HUMAN	5	sp	Q14195	DPYL3_HUMAN
362	6.72	6.72	22.02	8.912	5.898	sp|P40939|ECHA_HUMAN	Trifunctional enzyme subunit alpha, mitochondrial OS=Homo sapiens GN=HADHA PE=1 SV=2	HUMAN	3	sp	P40939	ECHA_HUMAN
363	6.72	6.72	23.08	23.08	23.08	sp|O00264|PGRC1_HUMAN	Membrane-associated progesterone receptor component 1 OS=Homo sapiens GN=PGRMC1 PE=1 SV=3	HUMAN	6	sp	O00264	PGRC1_HUMAN
364	6.71	13.5	44.53	44.53	34.82	sp|P61981|1433G_HUMAN	14-3-3 protein gamma OS=Homo sapiens GN=YWHAG PE=1 SV=2	HUMAN	11	sp	P61981	1433G_HUMAN
365	6.71	6.71	37.16	29.73	29.73	tr|C9JLU1|C9JLU1_HUMAN	DNA-directed RNA polymerases I, II, and III subunit RPABC3 (Fragment) OS=Homo sapiens GN=POLR2H PE=1 SV=4	HUMAN	4	tr	C9JLU1	C9JLU1_HUMAN
366	6.69	6.69	15.06	8.838	6.874	tr|A6NKB8|A6NKB8_HUMAN	Aminopeptidase B OS=Homo sapiens GN=RNPEP PE=1 SV=1	HUMAN	3	tr	A6NKB8	A6NKB8_HUMAN
367	6.64	6.64	27.37	15.09	13.04	sp|P38159|RBMX_HUMAN	RNA-binding motif protein, X chromosome OS=Homo sapiens GN=RBMX PE=1 SV=3	HUMAN	4	sp	P38159	RBMX_HUMAN
368	6.64	6.64	23.4	13.91	8.83	sp|P36957|ODO2_HUMAN	Dihydrolipoyllysine-residue succinyltransferase component of 2-oxoglutarate dehydrogenase complex, mitochondrial OS=Homo sapiens GN=DLST PE=1 SV=4	HUMAN	4	sp	P36957	ODO2_HUMAN
369	6.62	6.62	38.77	35.68	21.59	sp|O43809|CPSF5_HUMAN	Cleavage and polyadenylation specificity factor subunit 5 OS=Homo sapiens GN=NUDT21 PE=1 SV=1	HUMAN	4	sp	O43809	CPSF5_HUMAN
370	6.59	6.59	37.78	25	25	sp|P07741|APT_HUMAN	Adenine phosphoribosyltransferase OS=Homo sapiens GN=APRT PE=1 SV=2	HUMAN	4	sp	P07741	APT_HUMAN
371	6.58	6.58	50.92	27.98	22.94	sp|Q15907|RB11B_HUMAN	Ras-related protein Rab-11B OS=Homo sapiens GN=RAB11B PE=1 SV=4	HUMAN	5	sp	Q15907	RB11B_HUMAN
372	6.54	6.74	18.53	11.62	4.979	sp|P26639|SYTC_HUMAN	Threonine--tRNA ligase, cytoplasmic OS=Homo sapiens GN=TARS PE=1 SV=3	HUMAN	3	sp	P26639	SYTC_HUMAN
373	6.52	6.59	38.36	26.72	26.72	tr|F8W1A4|F8W1A4_HUMAN	Adenylate kinase 2, mitochondrial OS=Homo sapiens GN=AK2 PE=1 SV=1	HUMAN	6	tr	F8W1A4	F8W1A4_HUMAN
374	6.5	6.5	26.35	20.94	11.06	sp|P22234|PUR6_HUMAN	Multifunctional protein ADE2 OS=Homo sapiens GN=PAICS PE=1 SV=3	HUMAN	4	sp	P22234	PUR6_HUMAN
375	6.49	6.49	26.44	26.44	18.77	sp|Q99714|HCD2_HUMAN	3-hydroxyacyl-CoA dehydrogenase type-2 OS=Homo sapiens GN=HSD17B10 PE=1 SV=3	HUMAN	3	sp	Q99714	HCD2_HUMAN
376	6.46	6.46	38.14	38.14	29.66	sp|P62316|SMD2_HUMAN	Small nuclear ribonucleoprotein Sm D2 OS=Homo sapiens GN=SNRPD2 PE=1 SV=1	HUMAN	4	sp	P62316	SMD2_HUMAN
377	6.45	6.45	42.01	31.6	23.61	sp|P27105|STOM_HUMAN	Erythrocyte band 7 integral membrane protein OS=Homo sapiens GN=STOM PE=1 SV=3	HUMAN	5	sp	P27105	STOM_HUMAN
378	6.42	6.42	36.52	15.02	15.02	sp|P15880|RS2_HUMAN	40S ribosomal protein S2 OS=Homo sapiens GN=RPS2 PE=1 SV=2	HUMAN	4	sp	P15880	RS2_HUMAN
379	6.41	6.41	57.43	51.35	35.81	sp|Q04837|SSBP_HUMAN	Single-stranded DNA-binding protein, mitochondrial OS=Homo sapiens GN=SSBP1 PE=1 SV=1	HUMAN	5	sp	Q04837	SSBP_HUMAN
380	6.39	6.39	20.34	11.86	10.59	tr|G8JLB6|G8JLB6_HUMAN	Heterogeneous nuclear ribonucleoprotein H OS=Homo sapiens GN=HNRNPH1 PE=1 SV=1	HUMAN	3	tr	G8JLB6	G8JLB6_HUMAN
381	6.37	6.37	34.69	21.28	15.74	tr|F5GZN3|F5GZN3_HUMAN	Lactadherin OS=Homo sapiens GN=MFGE8 PE=1 SV=1	HUMAN	4	tr	F5GZN3	F5GZN3_HUMAN
382	6.35	6.36	33.86	24.41	21.65	sp|P61289|PSME3_HUMAN	Proteasome activator complex subunit 3 OS=Homo sapiens GN=PSME3 PE=1 SV=1	HUMAN	4	sp	P61289	PSME3_HUMAN
383	6.35	6.35	40.72	36.08	21.65	sp|P62081|RS7_HUMAN	40S ribosomal protein S7 OS=Homo sapiens GN=RPS7 PE=1 SV=1	HUMAN	3	sp	P62081	RS7_HUMAN
384	6.33	6.33	26.57	16.57	10.57	sp|Q12792|TWF1_HUMAN	Twinfilin-1 OS=Homo sapiens GN=TWF1 PE=1 SV=3	HUMAN	3	sp	Q12792	TWF1_HUMAN
385	6.33	6.33	32.02	27.53	19.66	sp|P62913|RL11_HUMAN	60S ribosomal protein L11 OS=Homo sapiens GN=RPL11 PE=1 SV=2	HUMAN	3	sp	P62913	RL11_HUMAN
[truncated: 447 more rows]

## Sheet: BM MSC DOXO sample 151029
N	Unused	Total	%Cov	%Cov(50)	%Cov(95)	Accession	Name	Species	Peptides(95%)	Accession			Molecular Function	PANTHER ID
[truncated: 359 more rows]

[truncated: 19 more sheets: BM MSC H2O2 sample 150823, BM MSC H2O2 sample 151021, BM MSC IRL sample 151023, BM MSC IRL sample 150517, BM MSC IRH sample 150520, BM MSC IRH sample 151025, BM MSC early passage sam 150525, BM MSC early passage sam 150913, A MSC REP sample 150617, A MSC REP sample 151108, A MSC DOXO sample 151109, A MSC DOXO sample 150514, A MSC H2O2 sample 150515, A MSC H2O2 sample 150518, A MSC H2O2 sample 151110, A MSC IRL sample 151125, A MSC IRH sample 151127, A MSC early passage sam 150602, A MSC early passage sam 151107]
