# Supplementary material for: Unbiased analysis of senescence associated secretory phenotype (SASP) to identify common components following different genotoxic stresses
Source: Aging (Albany NY). 2016 Jun 9;8(7):1316–27. doi: 10.18632/aging.100971 (PMC4993333; doi:10.18632/aging.100971)
Supplement: Supplementary file 3 [file aging-08-1316-s003.xlsx]

## Sheet: Foglio1
BM MSC REP	BM MSC DOXO	BM MSC H2O2	BM MSC IRL	BM MSC IRH	BM MSC early passage	A MSC REP	A MSC DOXO	A MSC H2O2	A MSC IRL	A MSC IRH	AMSC early passage
Q04446	P02751	Q15149	P02751	P02751	P02751	P02751	Q15149	P02751	Q04446	P02751	P02751
P31946	P35579	P02751	Q99715	Q99715	Q99715	P12111	P21333	P08123	P31946	D6RGG3	P08123
P62258	P12111	P12111	P12111	P12111	P08123	P08123	P35579	P12111	P62258	P08123	P12111
Q04917	Q14315	D6RGG3	P08123	P21333	P12111	P08670	P02751	P02452	P61981	P12111	P02452
P61981	Q15149	O75369	P21333	P08123	P02452	P02452	P08670	D6RGG3	P27348	P04264	P08670
P27348	P08670	P35579	P35579	P35579	P21333	Q15063	Q14315	P08670	E7EX29	E7EPZ9	P98160
E7EX29	P26038	P04264	Q15063	A0A0A0MTC7	P02461	A0A0A0MTC7	Q13813	P02461	A0A087WW66	Q60FE5	P02461
J3KN29	P02545	Q14315	A0A0A0MTC7	Q15063	P04264	P04264	O75369	P98160	Q15008	P02452	Q15063
P25398	O75369	Q9Y490	P02452	P98160	Q15063	P02545	P12111	Q15582	Q13442	P35527	A0A087X0S5
P62263	P12814	P08123	O43707	O43707	A0A0A0MTC7	P08253	Q9Y490	P07093	P42765	A0A087X0S5	Q15582
P62269	P11021	P02545	P08670	P07996	Q15582	P06733	Q01082	P02545	P62280	A0A0A0MTC7	P01024
P39019	Q9Y490	P26038	P07942	P08670	P08253	P05121	O43707	A0A087X0S5	P25398	P07996	P11021
P60866	P30101	P18206	P98160	O75369	P07996	G3XAI2	P18206	P08253	P62263	P98160	P02545
C9J9K3	P14618	P08670	P07996	P02452	A0A087X0S5	P07355	P02545	B1ALD9	I3L3P7	P13645	P12814
Q9BRK5	P04264	P63261	Q15582	P26038	P05121	P30101	P08123	P63261	P62249	Q15582	P08253
J3KPF3	P07355	P35527	P04264	P04264	P13645	P11021	P26038	P11021	P62269	P35908	P05121
P21589	P11142	P12814	P11047	Q15582	G3XAI2	Q15582	P46940	Q14315	P39019	G3XAI2	A0A0A0MTC7
P10809	P06733	P35908	P26038	A0A087X0S5	P08670	P07996	P02452	P05121	E9PPU1	P08670	P07093
P05388	P18206	P07996	P08253	Q15149	Q92626	O43707	P11021	P50454	D6RAT0	Q14315	O00391
P05387	P63261	P07355	P05121	P02545	P26038	P07237	Q00610	P04264	P62701	P11047	P07996
P62906	P46940	P13645	Q92626	P11021	P35908	P07093	P14618	P06733	C9J9K3	P02533	P30101
P30050	P13645	P14618	P11021	P18206	P20908	P36955	P08238	A0A0A0MTC7	Q9BRK5	P11021	P26038
P46777	P08238	P11142	P18206	P07900	P11047	P63261	P55072	P26038	J3KPF3	P02545	P11047
M0R261	P08253	J3KPS3	O75369	P08253	P11142	P12110	P67936	P30101	P21589	Q15063	P07585
P08253	P07237	P06733	P24821	P30101	P08572	P11047	P13639	O43707	P10809	P07355	Q92626
P11021	P08107	P30101	P02545	P07355	P07355	P23284	P11142	P06396	P05388	P63261	P50454
P68133	P10809	P11021	P08238	Q9Y490	P12110	P98160	P53396	P07355	P62906	P12814	G3XAI2
P61160	Q15582	P02452	P12110	P63261	O43707	P67936	Q09666	P36955	P62913	P30101	P18206
O15143	J3KPS3	P46940	P07355	Q14315	Q02818	P13645	P06733	P07996	P30050	P13647	O43707
O15144	P29401	A0A087WVQ6	Q76M96	P11047	P07093	P00338	Q14764	P10909	P50914	P12110	P14625
O15145	Q07065	P22314	P08572	P05121	P06733	P08254	P30101	P00338	J3QQ67	P55268	P12110
O15511	Q5JP53	P08779	O00391	P12814	P00338	P02768	P49327	P11142	K7ERI7	P35579	P06733
P61158	P67936	O43707	P35442	P55072	P30101	P50454	P13667	P12110	P46777	P05121	P09871
P23526	A0A087WVQ6	P55072	P06733	P06733	J3KPS3	P14618	P22314	O00391	P18124	P08253	Q14315
Q5T9B7	O43707	P00558	P55072	P09493	P05997	P02461	P15144	P11047	M0R261	P06733	Q02818
Q8IUX7	D6RGG3	P23284	P30101	P12110	P63261	P07585	P04264	P14618	P08253	P26038	P63261
P15121	P00338	Q15582	P13645	P14625	P14618	P26038	P00338	P13645	P11021	P07093	P36955
Q96IU4	P05121	P04083	P20908	P14618	O00391	Q14315	P07355	P67936	Q9UHI8	P50454	P20908
P02765	P04083	P08238	P14625	P00338	P02545	Q5JP53	P12814	P07237	P60709	Q15149	P04264
P01023	P06576	A0A087X0S5	Q14315	P24821	Q01995	P50395	P11216	O75369	P61160	P07237	P08107
P12814	P13667	P29401	P50454	O00391	P98160	P51884	Q15582	P07585	O15143	Q92626	P07355
O43707	P08123	P08107	P12814	P13645	P35527	Q02818	Q05682	P08107	O15144	P07585	P07237
P06733	Q01995	P04406	P14618	P13639	P50454	P03956	P14625	Q76M96	O15145	P10809	P55072
P15144	P02768	P13647	P07093	Q92626	P18206	P04083	P41250	P55268	O15511	J3KPS3	E7EUF1
P04083	P35908	Q01995	P13639	P07237	O75369	P12814	P00558	Q5JP53	P61158	P15924	P10909
P07355	P55072	P13639	Q00610	P50454	P11021	P35527	O00410	P35555	Q8N6G6	O00391	Q76M96
P08758	P00558	P00338	Q02809	Q05682	Q76M96	P20908	J3KPS3	P23284	P23526	P67936	P14618
P01008	P03956	P68104	P35908	P07093	P03956	Q15113	P04406	F5H5D3	F8W1A4	P05997	P07900
P05089	P25705	P02461	P00338	Q14764	P51884	J3KPS3	P07237	P20908	Q8IUX7	Q9Y4K0	P35555
P06576	P50454	P10809	P11142	J3KPS3	P08476	P55072	P13797	Q01995	A6NFX8	P24043	P67936
P53396	E9PGZ1	Q14697	Q15149	P11142	Q15113	O00391	P08107	P08238	P14550	P02461	P55268
P98160	Q16658	P05121	P05997	Q9Y4K0	P04083	P30041	P68104	P55072	P15121	O75369	P00338
P15291	P13639	P53396	P35527	Q76M96	Q16270	P08758	B1ALD9	P51884	P02765	P20908	P53396
P21810	P14625	P02768	Q02818	P35442	P13639	Q15149	P50395	Q15149	P01023	Q76M96	J3KPS3
P13497	Q15084	P12110	P55268	Q14697	P35442	P35555	P50454	P13639	P12814	P14625	P11142
P80723	P23284	Q02818	Q9Y6C2	Q02809	P29401	D3YTG3	P08758	P22626	O43707	P14618	P26022
P19022	P15144	P38646	P07237	A0A087WVQ6	Q06830	F5H5D3	Q16555	Q15113	P61163	P11142	P13645
E9PGZ1	P13797	Q07065	P29401	P29401	P36955	Q32Q12	P13010	Q92626	P06733	P15144	P23284
P27824	O75083	Q14764	P08476	A0A0A0MT01	P23284	P35908	P05121	Q06830	Q16706	P35442	Q08380
O94985	P50395	F5H5D3	Q9Y4K0	P08572	P04406	P11142	A0A087X0S5	P01033	P54802	Q02818	Q02809
O43852	Q06830	P13797	Q14697	Q01995	P36222	Q15084	P04083	P68104	P15144	O43707	P01023
B1AK88	P35527	Q14195	Q9Y490	Q5JP53	E9PGZ1	P01023	P29401	P35908	E9PG40	A0A087WVQ6	P29401
Q9UI42	P08133	P50454	Q8IUX7	P53396	P16035	P08238	Q01518	P0C0L4	Q06481	P04083	Q15084
X6R8A1	P68104	Q06830	Q5JP53	P35908	P21810	P35579	Q5JP53	E7EUF1	P04083	P18206	Q9NRN5
G3XAP6	A0A087X0S5	O00391	P14543	P35527	P10909	P29401	P13645	P29401	P07355	Q08380	P13639
P07858	P38646	P60174	P13667	P36222	F8W6I7	O75369	A0A087X253	P18206	P08758	D3YTG3	Q06830
P07339	P04406	J9JID7	P36222	P46940	Q9NRN5	P10909	P23284	P04083	P08133	P55072	D3YTG3
P43235	P08758	P08253	Q14112	G3V511	P12814	P68104	P38646	P01024	Q6P452	A0A0A0MT01	P23142
Q6YHK3	P07093	Q7KZF4	G3V511	P13667	Q9Y490	P16035	Q01995	Q15084	P01008	P01008	P13667
P60953	P30041	O75083	P21810	P04083	P02533	A0A0A6YY95	P62258	Q9BRK5	E9PFW3	O43852	P51884
Q8WUJ3	P02452	Q15084	A0A0A0MT01	Q02818	P02768	Q08380	P07996	Q32Q12	Q07812	Q15113	P02768
P36222	Q32Q12	Q16658	P02461	P08476	Q08380	P0C0L4	Q99536	P35579	B0YIW6	P48668	G3V511
O00299	P60842	P67936	O00469	Q14112	P13797	P09871	P23381	P35527	P15289	P36955	Q15149
Q9Y696	P07996	Q32Q12	P50395	F5H5D3	Q92743	P55268	Q15075	P50395	P08243	D3DQH8	P03956
A0A087WVQ6	P21589	P50990	P03956	O75326	Q32Q12	O14818	P46821	Q08380	P14868	P28300	P16035
P09496	P04792	A0A0A0MTC7	P00558	P21810	P35555	A0A087WWU8	P12956	Q02818	P25705	F5H5D3	O75326
P10909	E7EQR4	G3XAI2	F5H5D3	P03956	P68104	Q16610	P07900	P16035	P06576	P04406	Q32Q12
E9PK25	Q13813	Q5JP53	P04083	P00558	P07237	P62258	P07093	P03956	P53396	P06576	Q16555
Q9Y281	P07900	P14625	P04406	P51884	F5GZN3	P14625	Q14204	Q9NRN5	P98160	P14543	Q15113
Q76M96	P52209	P15144	Q01995	E7ETU9	Q9Y6C2	P02765	O15144	P05155	P15291	P23284	P28300
P02452	Q14697	P37837	P10809	P30041	P05155	P01024	Q7KZF4	P28300	O43505	P35555	Q9Y4K0
P02458	P27348	P02533	O75326	Q15084	P07585	Q8NBS9	A0A0A0MRV0	P08476	H3BS10	Q9Y6C2	Q16610
P02461	P41250	P26641	P04792	P67936	P17936	P20618	O75874	P14625	P07686	P03956	P50395
P02462	P26641	P06576	P53396	P22626	P13647	P35442	Q14974	Q8NBS9	P21810	P00338	P04083
A0A087WXW9	P17987	P07195	P46940	P13797	Q15084	Q01995	P34932	P30041	P53004	Q15084	P35442
P20908	F8W6I7	P12081	P51884	P50395	P28300	P04406	P11413	P04792	P13497	Q07065	P22626
A0A087X0S5	P04843	P36222	O94985	Q9Y6C2	P60842	P13667	P08133	P09871	P80723	Q5JP53	P05997
P27658	Q8NBS9	P49327	Q08431	P68104	O15144	P26022	Q32Q12	P12814	F5H2F4	P26022	P02765
Q99715	P37837	P11413	P10909	P19338	P27658	P25788	P26641	Q5HYB6	F8VPD4	O94985	P49747
P08123	J9JID7	P21589	Q08380	P36955	P07195	P25787	P78371	D3YTG3	P19022	Q02809	P08254
P08572	P01023	P11216	P19338	P04406	P07737	P22626	Q5HYB6	P01023	C9J813	Q14112	P35527
P05997	P07195	Q53FA7	P35555	P55268	Q16610	Q92743	P30041	P18669	H0Y7A7	G3V511	A0A087WUZ3
P12110	P37802	P04792	P07585	P08238	P08238	Q76M96	P26639	P53396	H0Y9Q7	Q06830	Q12805
E7ENL6	Q53FA7	O60701	P07900	Q7KZF4	Q02809	Q16270	P60842	Q12841	P27824	P13667	P13797
P12111	O14818	P11047	P36955	P02461	Q9Y4K0	P08779	P52209	P35442	K7EM73	P09871	Q01995
Q96CG8	P01008	P61158	O43854	P04792	P00558	O75326	P08253	Q15019	P27797	Q9NRN5	Q13813
B4DPQ0	P62805	P32119	Q6YHK3	Q08380	P32119	P06576	P36871	A0A087WVQ6	O94985	P02768	P68104
P09871	A0A0A0MT01	P07093	O60568	P23284	I3L504	Q9NRN5	F5H5D3	O14818	O43852	P21810	Q14697
P01024	P10909	F5H365	P22626	P0C0L4	O75326	P05155	Q5TCU3	Q92743	B1AK88	P29401	O94985
P0C0L4	P34932	P07237	Q15084	Q96TA1	O00469	P18206	Q15084	P52209	P16152	P60174	F8W6I7
P08603	P36222	P20908	Q92743	O94985	P02462	P25786	J9JID7	E7ENM0	P16870	Q16610	P04792
P29279	P07737	P07900	P23284	A0A087WSY9	D3YTG3	P28066	P19338	Q9Y490	X6R8A1	P10909	Q92743
P12277	P40926	A0A087WZH7	P68104	P05997	O94985	P63104	O60664	P26022	P49747	P00558	O60568
A0A0A6YY95	P20618	P30041	P60842	F5GZN3	P04792	P32119	P04792	P28074	P04040	Q08397	P35579
Q9UBG0	P32119	Q96CX2	P30041	P10809	P55072	P07195	O14818	P08254	P07858	P68104	A0A0A6YY95
P01040	G3XAI2	P41250	Q93063	P07195	P53396	Q13813	Q86VP6	P62937	P07339	P23142	P98095
P01034	O60701	O00469	Q15113	Q92743	Q14315	Q96D15	B1AK88	A0A0A6YY95	P07711	P51884	P14543
E9PP21	E9PEX6	Q16270	Q07065	P22314	P0C0L4	E9PK25	Q04446	P17936	Q9UBR2	O75326	Q7KZF4
C9JFR7	P01024	P52209	P23396	Q8IUX7	P22626	P21589	Q14697	P07737	Q03135	Q13219	Q9BRK5
P07585	P31948	P35555	P78371	Q9NRN5	P01137	F8W6I7	J3KPM9	Q16610	A5YKK6	Q8NBS9	Q8NBS9
P81605	P09211	P08133	Q9NRN5	Q32Q12	Q08397	P09211	P01024	P62805	Q6YHK3	P08779	P24043
Q08554	P62258	E9PK25	P02533	Q07065	O43854	P40925	P12110	Q12805	F5GXJ9	A0A0A6YY95	P01033
Q14574	Q02818	P13667	P22314	P01023	P13497	P01034	P02768	P26641	P16070	P63104	P08476
Q02413	A0A087WZH7	Q99497	P55287	P61158	P18669	P23396	Q16658	P06576	P60953	P08758	P07686
P15924	Q16555	Q16555	Q06830	P78371	P22692	Q6EMK4	Q06830	P61158	Q9H444	P08238	P21810
Q16555	Q9ULV4	P25705	P15144	P06576	P14625	P13797	P05120	P19338	P36222	P14923	F5GZN3
G3V5Q1	P02533	F8WCF6	P07195	P35555	Q12805	F5H2D0	O95782	P02765	O00299	P08254	Q6EMK4
Q8TEA8	E7EX29	P55268	Q16658	P41250	E7EX29	P40926	O60701	D3DQH8	Q9Y696	Q9BRK5	B4E1Z4
Q14118	P30533	P36871	O15144	Q15113	D3DQH8	P30048	O75083	P17931	B4DJV2	P32119	P41250
Q12805	P18669	Q5T9B7	A0A087WSY9	Q06830	P50395	P07737	P61158	O94985	A0A087WVQ6	P17936	E7EX29
O43854	P0C0L4	P78371	P26022	O60568	P67936	P30040	P48643	P23142	P09496	Q01995	Q96AY3
P68104	P12081	Q96TA1	E9PGZ1	O14818	P41250	Q9BRK5	Q96QK1	Q86UD1	P10909	A0A0A0MTS2	E9PK25
P24534	P11413	P22626	P13497	P08758	Q9Y696	P60842	Q9Y696	P01008	Q14019	P16035	P28074
P13639	P62937	P07737	Q14764	P20618	P62937	P07686	P22626	P30040	A0A0A0MRJ7	E7EUF1	P04406
Q9Y6C2	P22626	P50281	P13797	Q8WUJ3	P30041	Q02809	Q01813	P25786	Q9Y678	Q15293	P18669
P30040	A0A087WUZ3	P62805	P40925	P01210	E9PK25	P62937	M0QXB4	Q13813	E9PK25	P07737	Q12841
P14625	P08476	Q9Y6C2	Q16270	Q16658	P37802	O00299	P17987	P04406	Q9Y281	P25705	Q86UD1
V9HW75	Q16270	P61160	Q7Z7G0	P07585	Q99497	Q12805	P0C0L4	P05997	F8W7A7	Q12805	Q8IUX7
Q96HE7	Q96AY3	P38159	P08758	P36871	Q16658	Q86UD1	Q15019	I3L504	Q76M96	Q14697	P10809
P60842	Q99497	P06748	P16035	F8W6I7	P26022	P18669	P21589	P07858	P02452	Q6EMK4	P32119
P55884	P11047	P17987	O60664	P60842	P01024	Q5T985	Q9Y617	Q96D15	P02461	Q14764	P40926
Q13347	P28074	P62269	Q16610	P40925	P08758	P23142	P02461	Q6EMK4	A0A087WXW9	P49747	O43852
Q15056	P80723	P16035	P52209	A0A0A6YY95	P23142	P07711	P18669	P01034	P20908	Q96AY3	P62805
I3L504	Q08380	Q9Y696	P19021	Q9Y696	P14543	Q12841	D6RGG3	P27348	A0A087X0S5	P04792	P78539
Q16394	P25786	P05120	P26641	P05155	P55268	P36222	P36955	O43852	D6RGG3	Q16270	B1AHL2
Q93063	P09601	P37802	P01023	O43854	P16152	P01033	Q96TA1	O60664	P08123	P40926	P07737
Q16610	P40121	P05023	Q7KZF4	P26022	P20618	P05388	P01023	P61160	P08572	Q96D15	Q96D15
E7EQR4	P06748	P30040	P09871	P18669	Q15149	P01008	P09211	O00299	P05997	P09211	Q15293
P52907	P08254	Q92626	Q9Y696	P52209	P01210	Q05707	Q5T5C7	G3V511	P12110	P07195	P60842
P47755	P52907	P07339	P12956	Q12805	Q5T7F0	E7EUF1	P35527	P07339	E7ENL6	U3KQK0	Q93063
Q16658	Q99584	P49368	P01210	P34932	P25787	Q13162	P05388	Q9UKZ9	P12111	Q8IUX7	Q9BUD6
Q01469	P30040	P23526	P27658	P26641	O76061	E9PHK0	O60568	E9PGZ1	A0A0A0MS88	P08133	P37802
P35555	P61604	Q08380	A0A0A6YY95	P40926	P08603	Q16658	Q9UQ80	P07711	Q96CG8	P21589	P08758
H0Y7Z1	P40925	E9PEX6	Q08397	P02768	P26641	Q99536	P37837	O75787	Q9BXJ0	P27797	P08238
P02751	E9PK25	P04843	Q12805	P09211	P09871	P53396	P62937	P98095	F5H2D0	Q9BXX0	P15144
Q4ZHG4	Q14847	P50991	Q14974	Q13813	Q9BRK5	Q92626	P40925	P13797	P09871	P98095	Q14112
B1AHL2	O00299	P26639	Q6EMK4	P23396	G3V3M6	P08107	Q04917	P07195	P01024	P09493	P07195
P23142	P60174	F8W6I7	Q96RW7	P32119	P40925	P61160	P50990	F8W1A4	D6RAX7	Q15323	P15291
Q5D862	P12110	P36955	Q96TA1	P10909	P40926	O94985	J3KPF3	P40926	A6PVH9	Q32Q12	V9HW75
P21333	P36955	G3V511	Q32Q12	Q14974	F8WCF6	P49721	P06576	P69905	B4E3S0	P05155	P50990
O75369	C9JFR7	Q6EMK4	P36871	O15144	P35579	P23381	P63104	Q15293	G3V4N7	P13639	Q16270
Q14315	P07339	P08758	P17936	P01024	P28074	Q6P452	P98160	Q9Y4K0	A0A0A6YY95	P07858	P28066
Q12841	Q15046	O75396	P05155	P05388	G3V5Z7	J3QRS3	Q9NZM1	P07900	Q9H6B4	Q02413	P19367
J3KNW4	P35241	P40121	P08107	P19367	P15291	P69905	P25786	P60842	P01034	P08107	A0A087WVQ6
P07954	D6RAF8	A0A0A0MRV0	P01024	E7EQR4	P10809	P25705	Q99497	Q16270	C9JFR7	Q92743	Q14974
P17931	P09382	P40227	P04843	P08133	P01033	P17936	P23396	P00558	P00403	P30041	P06748
Q08380	Q9Y617	E5RJD8	P08133	P16035	Q14766	B7Z6Z4	Q16851	Q99536	Q14204	Q12841	P78371
P09104	P21796	Q14974	E7EX29	O75083	Q12841	P31946	P20618	A0A087WTM7	Q7L576	Q13813	Q9Y490
Q96QA5	P28066	Q9BRK5	E7EQR4	P37802	Q5T9B7	Q06033	O95336	P06748	Q07065	A0A087WWU8	O14498
P07093	P05120	Q8NBS9	E7EV71	P02533	P63244	P21810	P30153	O75326	Q96KP4	Q08431	Q08629
A0A0A0MTS2	O75396	C9JFR7	P23142	P50990	P30085	P26641	Q96AC1	P28066	Q5SZU1	P08572	P01008
P09211	Q13162	P17301	P0C0L4	P23142	P09382	P10809	P40227	P14543	P07585	P13797	P40925
P04406	P30048	P31944	P78539	Q07954	P25786	P09382	P32119	P25788	Q13011	P37802	P13497
H7C410	O95394	Q15907	P09211	A0A0A0MRV0	P62805	P52907	P11047	P09382	F8VVL1	P28074	Q5T7F0
Q8NBJ4	P30086	P05997	O75083	Q99497	P61158	O14498	P84077	Q9BUD6	H0YNW5	O14498	P28072
P28799	A0A0A0MR02	P51149	P32119	P35241	P61978	P19338	P07195	Q16555	P81605	P62937	P26641
Q14393	P28070	P31949	P15291	Q16610	P19022	O60568	O00391	P40925	Q08554	Q00888	Q13162
P04899	P02765	Q99880	P20618	Q16270	P01008	Q9H0U4	P23526	P41250	Q02413	Q86YZ3	P12956
P62873	P31949	Q14847	P67936	Q6YHK3	O14498	Q16555	P61160	G3V5Z7	P15924	O00462	Q14764
P62879	P61160	P19338	P09382	P28074	P31949	P00558	P07737	P43235	O94907	P04040	P49721
P08107	P31946	P30086	P33908	P11216	Q6EMK4	Q9UKZ9	P00491	P32119	E9PEX6	P01033	J3QQX2
P34932	P16035	P19367	Q8WUJ3	Q6EMK4	A0A0A6YY95	P12081	Q06323	Q13162	P36957	A0A0B4J2A4	P06576
P11142	P13489	Q13200	Q32P28	P04843	P01023	P28074	P22234	Q9Y617	Q16555	P15291	P22314
P04792	G3V5Z7	B5MDF5	P18124	P25705	P09211	P13639	O00299	Q9Y696	Q14195	P30086	F8WCF6
P07900	O95336	P98160	P18669	P46821	Q96HC4	P26885	P47895	Q13838	O14672	Q6YHK3	P61160
P08238	P51149	P61604	P40227	E9PK25	A0A087WZH7	P08476	P31946	Q14112	O43184	Q5T7F0	P62937
P69905	Q14974	P60842	Q01518	Q14204	P23381	Q9BRK3	P17655	O14498	G3V3M6	Q9Y617	Q16394
P51858	Q32P28	A6NLN1	Q15008	P28300	P50990	P68871	Q15404	P40121	P39656	F8WCF6	P01034
P09651	B5MDF5	Q86YZ3	P62805	P01008	Q13404	B5MDF5	O60506	M0QXB4	P04843	P61981	P35908
P51991	P18085	P18669	P05388	P62937	Q15691	P52565	Q9HB71	Q06033	Q16643	P17174	D6RGI3
D6RAF8	K7ER96	B4E3S0	Q16555	P40227	Q8IUX7	P28070	Q96KP4	P22314	Q14118	P62805	E9PRY8
P61978	Q16531	P62258	P12236	P62805	E5RJD8	P98095	P52565	P28072	E7EUF1	Q92520	P30048
P22626	G3V3M6	P50395	P25705	P13497	Q96CX2	P14543	Q99832	P31946	Q12805	E7EV71	Q9BTM1
G3V4C1	Q92743	P08603	E9PK25	P09871	P61160	P15144	P40926	O75874	O95967	Q32P28	P52209
P19367	P00367	J3KPM9	P13647	P05141	P06748	P28300	Q16543	P07686	O43854	P01023	P62269
P12081	P51884	P52907	P17987	Q15404	Q4ZHG4	P24592	P35241	P62258	Q9NZN4	B4DPQ0	P37837
Q9BTM1	P69905	Q8WUM4	P40926	Q8NBS9	P08107	Q13838	Q9UHD8	Q99538	P68104	Q86UD1	D3DQH8
U3KQK0	Q96D15	I3L504	P07737	Q08397	P01034	P51149	K7ELL7	P62424	P24534	H3BS10	Q16658
P62805	P30740	P27824	Q8TB73	F5H365	Q15389	Q9BUD6	Q8NBS9	B1AK88	A0A087X1X7	J3QTR3	P21589
Q86YZ3	F5H365	Q7Z7M9	P37802	P37837	B4E3S0	P04792	P16152	P62269	P26641	P09651	J3QRS3
P10915	Q14764	Q92859	P61160	Q32P28	E9PP21	P15291	P41252	E9PRY8	P13639	Q969H8	P35241
P00492	Q6EMK4	Q8N1N4	I3L504	P07737	Q04917	Q96CG8	A0A087WZH7	P24592	Q9Y6C2	Q8N1N4	P60174
P01876	J3KPF3	P07585	F5H365	P25786	P16949	P13647	A0A087X1N8	P46781	Q9BXX0	P24592	Q9UKZ9
O14498	P49721	P81605	O14818	P16152	O15511	G3V5Z7	P07384	P36222	Q99961	P25788	P08572
Q14974	P28072	Q13219	P02462	P62820	P52209	D3DQH8	P07814	P24593	Q9NZ08	P50395	P30050
Q8IWB6	Q06323	P09382	Q9BRK5	P14543	O75083	P05997	P40121	Q9ULV4	P30040	Q9UBR2	Q99536
Q13308	P21810	A0A0A0MT30	P01033	P25788	E7EQR4	P52209	P09429	P61604	P14625	O95336	P00558
P08476	Q96HC4	P28300	P21589	Q5T985	P28072	P78539	O43852	C9J9K3	Q9HCU0	P35052	Q13219
P17936	Q6UVK1	P07954	P50990	P53618	J3QRS3	P51148	P37802	P46777	O60869	P38646	Q6YHK3
P22692	Q15365	Q13404	Q7Z7M9	Q96AY3	P30086	J3KQJ1	P27816	O15143	V9HW75	O75083	P08294
P24592	P00491	B4DY09	C9J9K3	Q5HYB6	Q96D15	Q9ULV4	Q6NZI2	P51858	Q96HE7	Q99497	P62987
Q16270	P27824	P05556	P62701	P25787	Q14847	P13489	P30044	P31949	P60842	P01034	Q9HCU0
P05556	O60664	O14498	Q10471	P11413	P69905	P08133	Q15907	P15291	P55884	P25787	P24592
B4DY09	P50281	O94985	P34932	P61160	Q15404	Q9HCU0	P49720	Q04917	O00303	P62263	P31946
P03956	E9PRY8	A0A087X054	P46781	P31949	Q93063	Q01518	A6NLN1	P13489	Q13347	P31946	Q99832
Q96CN7	B1AK88	P10909	O00299	F8WCF6	Q15365	Q08629	C9J9K3	P19827	E7EX17	P07339	F5H365
P14923	Q96CX2	P69905	P26639	P52565	P37837	J3KTL2	E9PK25	P22692	Q16394	E9PEX6	M0R1G9
P13645	A0A0A6YY95	P30048	F5H4Z8	P62249	O15145	O95336	P62805	O95865	Q93063	P28072	Q9BRK3
K7ERE3	P78417	C9J9K3	Q99832	Q86VP6	C9JFR7	P30050	P07585	P21810	Q16610	K7ELL7	P15311
P02533	Q14195	P12236	P28074	M0QXB4	P24592	Q9Y696	P45974	J3KTL2	P08294	O60568	Q9Y6C2
P08779	P61981	P61981	Q12906	G3V5Z7	P55145	Q9BTM1	P35606	P18124	E7EQR4	P00367	P33908
Q04695	G8JLB6	P23142	Q86VP6	P13674	Q86UD1	A0A087WTM7	P53621	P49327	P52907	P22314	H7C410
F8VZY9	P35442	P08476	Q15389	P60174	P09493	V9HW75	Q9NZN4	P37837	P47755	P58215	P08133
P35527	O15145	Q00688	P50991	P78539	P08133	P49720	P28074	P08294	Q16658	Q9HCU0	J3KPF3
P04264	Q15113	O15511	P62937	Q93063	Q06323	P62318	P30040	P46940	P35555	P61026	P17936
Q7Z794	P07858	O15145	P06576	E7EX29	P12081	Q14112	P27348	O75347	H0Y7Z1	V9HW75	P01137
P35908	O14498	Q96AY3	P62249	P06748	Q96CN7	P62269	P02765	P12956	P02751	Q16555	P40227
P19013	P01034	J3KPF3	P28300	D3DQH8	P52907	A0A0A0MRJ7	P49721	O95084	G3XA98	Q13740	Q96KP4
P13647	E9PP21	F8W6P5	P11216	P17987	Q8WVC2	P11216	B5MDF5	P78539	B1AHL2	P18669	O15143
P02538	Q5W0H4	P26022	P41250	P08107	P17987	Q96KP4	P10809	P25789	P23142	Q92859	C9J9K3
P04259	P13647	Q16851	P35241	Q9Y678	P30050	P17931	P09382	P15144	P98095	J3QSU6	Q96HE7
P08729	P15121	Q86VP6	P08603	P61978	P25788	P07900	P51884	P68871	P21333	P28066	Q9BXJ0
Q8N1N4	P26022	P20618	Q8NBS9	Q5T9B7	P68133	P00367	P52907	Q9UJJ9	O75369	P05556	O60701
Q6KB66	A0A087X0K1	Q15113	P60174	B1AK88	P68871	Q9Y490	B2R5W2	P78371	Q14315	Q01082	O00299
Q08431	Q12841	J3QQX2	O60687	Q9BRK5	Q53FA7	J3KPX7	P61163	P30048	Q12841	F8W1A4	Q8N6G6
E7ER44	P20700	O15143	P19367	Q01518	Q9Y5S9	P25789	Q6IBS0	P10809	J3KPS3	E9PK25	P50991
A0A0A0MTC7	P02461	P51148	Q86Y38	P12081	P78371	Q53FA7	P28066	X6R8A1	A8MVZ9	P06748	P62263
P55268	H0Y7A7	Q96CG8	P16152	P55786	P28066	E5RJD8	P07339	G5E9Q6	P07954	B7Z6Z4	H3BS10
P11047	P24592	P01023	P25788	Q15417	P28070	E7EUC7	B4DY09	P78417	P17931	Q93077	P13489
Q14766	O60568	P34932	P25787	O75787	P18085	Q96AY3	Q15631	P43034	Q08380	Q04446	P04899
P30740	P31153	P43490	P37837	P15291	Q14195	J3KMX3	Q53FA7	Q16658	P09104	P51148	Q15365
Q14847	F5GXX5	P55145	P62269	P48643	P31946	Q9Y617	Q15293	P60903	Q92820	P22626	P02749
P00338	O94985	Q99832	D3DQH8	Q8TB73	Q6YHK3	P10599	Q96AY3	Q14974	M0QZG3	P11216	Q14847
P07195	Q13404	D3DQH8	Q04917	P28066	P49721	Q5T9B7	P06748	O43184	A0A0A0MT01	Q13308	P22692
P51884	Q6YHK3	P18124	P07858	Q96KP4	H0Y7Z1	D6RGI3	P78417	Q6NZI2	P07093	P37837	P02649
Q08397	P48637	D6RGI3	Q92859	P49721	P38159	P41250	Q14195	Q9UHI8	A0A0A0MTS2	P01024	C9J0K6
Q9Y4K0	O75326	O60568	Q9BWS9	Q06210	Q7Z7M9	D6RAR4	Q15008	O00410	K7ELL7	Q99536	P27348
P58215	P68371	P30050	P52907	Q12841	Q13162	J3QSU6	P25787	P11216	P00367	P48740	B1ALD9
P40121	P07686	H7BY58	P23526	A0A087WZH7	P60174	Q6NZI2	P62249	Q86VP6	P78417	Q9UHI8	Q53FA7
Q14764	K7ELL7	J3KQ32	E7EUF1	Q4ZHG4	P60866	P07339	P61088	P23381	P09211	P19022	E9PG40
P40925	Q9UIJ7	Q96KP4	P61978	K7ER96	Q5T985	B1AK88	P60228	K7ERG9	P04406	P80723	Q14766
P40926	D3DQH8	P68371	P27824	P09382	Q96CG8	O75787	P49368	O75462	P41250	O95865	Q96RW7
P33908	Q96CN7	P51884	B4DGU4	A0A0A0MTS2	Q9BWS9	P28072	P25788	P15121	P11216	P78371	Q71U36
Q9BRK3	F6TLX2	A0A0A6YY95	B5MCX3	Q13200	P24593	Q04917	P31939	P52907	H7C410	O00299	P61981
P01033	P10599	P01008	P01137	P04844	B1AK88	P21796	O95865	P08758	Q92896	Q5SZU1	P17987
P16035	P00403	P04632	Q13813	Q96HC4	P07900	P02647	Q9Y224	Q8IUX7	Q8NBJ4	P60866	P68371
Q641Q3	X6R8A1	P17931	Q13200	Q13838	D6R9P3	O75874	P38606	Q15942	Q14393	Q04837	A0A087WYV8
P26038	P23142	Q99536	Q14204	A0A087X054	P50991	Q13011	P61978	B1AHL2	P04899	P48637	Q93077
B7Z6Z4	Q96CG8	P20700	P00387	P26639	B4DUT8	P02458	B0YIW6	C9JFR7	P62873	P17931	P05154
J3QRS3	P62942	A0A0A0MR02	P49755	P17931	P07858	Q5SZU1	Q13404	D6RGI3	P29992	P33908	J3KTL2
P24844	P07954	Q76M96	F8WCF6	Q96CN7	Q96RW7	Q8N6G6	Q9Y678	P24534	P63244	P28799	P13647
P35579	Q08257	P78417	P31949	P23381	E9PF17	P07858	Q9BT78	H0Y449	P08107	P07954	A0A0B4J269
A0A087WZH7	P55786	Q9Y4K0	P31946	Q9HB71	P51149	P24534	P61247	P60174	P34932	Q7Z7M9	P08779
Q92859	Q15293	P28070	Q12841	P49755	P46940	P02533	P12081	Q14847	P11142	G3XA98	Q00888
Q09666	E9PAV3	P28074	P30085	Q9Y617	P25398	P04899	Q9Y3F4	P17987	P04792	P00403
Q5T7F0	A0A0A0MRJ7	Q02809	E7ET40	P30085	O00299	Q9Y4K0	P26022	Q96AY3	P07900	P07686
Q14697	Q96A72	P49755	O95084	A0A087WTM7	P30040	Q99436	P30085	Q96FQ6	P08238	O60687
Q96TA1	P14550	P13010	A0A087X1X7	P51665	P62913	P06748	O43776	A0A087WXE9	Q96RW7	P07900
P40261	P81605	D6RAF8	A0A087X054	P50991	Q9NR12	Q14393	A0A0A0MSS8	Q9HB71	P05546	P30050
P14543	G3V511	P10599	Q16394	P55287	Q14697	Q9UHI8	G3V5Z7	Q01518	D6RD18	Q07812
Q14112	P00505	P21810	P11413	P08603	O95450	Q92688	Q92499	P61981	P09651	P49368
Q9Y266	Q04760	P55884	O60506	P28070	Q96KP4	H0Y7Z1	Q07960	P51991	P51991	C9JFR7
Q02818	Q9UBG0	P04899	J3KPX7	O14498	Q5KU26	P61247	O15145	Q9UHD8	H0YA96	P00505
P19338	O95865	P28072	Q15404	Q14393	Q14019	O60687	P68036	P50990	P61978	P34932
P06748	Q12904	Q12841	Q6PCB0	O15143	P62857	P60174	P06737	Q08629	A0A087X0X3	Q8N6G6
P15531	P40261	P15531	P02768	J3KPX7	P13667	P31949	Q12792	P13667	P22626	J3KQ66
Q32Q12	P61026	O95394	Q13162	P01137	M0QXB4	O14672	O15143	Q14118	G3V4C1	P51571
Q9NRN5	P45877	P40925	P62820	Q16555	A0A087X1Z3	E9PG40	O75326	P62318	P19367	J3QRS3
Q96HC4	P17936	Q5T0D2	Q99497	B0YIW6	P20290	Q14766	H7BYY1	P61978	P12081	Q9BXJ0
P26022	Q71U36	P23381	P08779	P17936	A0A087WVQ6	E9PEP6	O75436	P62701	P10412	P13489
P19021	P15531	P08572	O00303	Q15008	P47755	K7ELL7	Q16647	Q16394	P16401	P78539
P62937	Q9BTM1	P35241	Q5T9B7	P21980	P62316	D6RE83	Q99436	Q15691	Q93077	P01210
P23284	P04066	P31153	O60701	P63244	P61019	P18124	Q9UJ70	P40227	Q9BTM1	P30048
Q96AY3	A0A087WW43	Q14914	G3V5Z7	P22692	O14818	P62906	P05023	P05546	U3KQK0	O60701
P26885	P09104	P15924	Q04446	Q9BTM1	Q9BRK3	P05543	O43175	Q7KZF4	Q16778	C9J9K3
B1ALD9	P02458	P01024	P35232	P51148	P36871	O43809	P10909	P04899	K7EK07	Q92820
Q15063	P31150	P62140	B4E3S0	Q92859	P02765	Q9Y281	Q14103	Q9Y678	P62805	P60842
Q92626	E7ENL6	X6R8A1	P30044	O60664	J3KMX3	Q92954	P51858	Q14766	Q09028	P28070
Q06830	A0A0B4J269	P60468	P13010	K7ELL7	P62258	P62316	P61019	Q93063	Q86YZ3	F8W809
P32119		P25786	Q99460	P02462	Q96AY3	O60701	P62269	Q13200	A0A087X054	P16070
Q13162		P47755	P62277	P07858	Q9Y281	Q12765	P62820	G8JLB6	P01876	P26641
P30041		P30044	P25786	P52907	Q9Y376	P22692	Q15691	P62263	O14498	E9PGZ1
P30086		Q13347	P68036	P21589	Q14393	Q99497	P15121	Q14764	Q14974	Q08629
P00558		Q96A72	F8W1A4	P01034	P04259	P01042	P28070	P34932	H0Y8C6	Q14118
P18669		P04004	Q13838	Q04446	Q5HYB6	O75083	P51149	H0Y7Z1	A0A087WXE9	P01137
P55058		P24592	O00231	P19022	Q16555	P05141	Q5W0H4	E9PAV3	Q8IWB6	H3BQZ9
Q9Y617		F5GXX5	P22234	P12956	P27348	P62244	O76003	O00303	Q13308	Q9UNN8
P36955		F5H7Y6	Q8IXL6	P01033	Q96A72	P02649	P60174	P05154	P08476	P52907
P05155		D3YTG3	O14498	J3KTL2	Q14974	P68371	Q06210	Q9HCU0	P17936	P04843
P05121		P05154	G3XAM2	P78417	P49767	P49755	Q14152	P80723	P22692	Q93063
P13797		Q07954	Q96CN7	P21796	O95394	P13010	P62701	A0A087WYR3	P24592	Q9Y490
Q15149		P02748	B0YIW6	P68036	P78539	A0A087WUZ3	P35908	Q15233	Q16270	P08648
Q15365		O95782	P28070	P13010	O15143	Q32P28	Q15046	Q02809	P08648	J3KQJ1
Q7Z7M9		P35442	B4DUR8	Q07960	Q12792	P50281	O43809	Q14204	E9PEE8	Q9UKZ9
Q00888		P01034	P27348	H7C2I1	P78417	Q5TCU8	P61981	P62917	P05556	J3QQX2
M0R1G9		E7ENL6	Q9UBG0	P15144	Q04446	P10301	P13489	F8W914	Q5T985	Q04695
P02545		B1ALD9	Q96QV6	O00299	Q32P28	P25398	H7BY58	P13647	P03956	Q9NZ08
Q15113		P28066	P30153	Q53FA7	Q92859	P05455	Q13200	P46821	Q96CN7	E9PLK3
Q02809		Q13162	E9PGT1	P49368	A6NLN1	P45877	Q96IU4	P49368	P14923	G3V1D3
E7ETU9		P17936	Q9Y265	P40121	P62942	E9PGA6	Q9NRV9	O75718	Q7Z4H8	P02765
O00469		A6XMV9	Q15417	O43242	P61604	Q96C90	P28072	P13497	Q14532	Q14974
O60568		P43034	P07954	O15145	P24666	P46821	O00231	Q15121	O76009	Q6UXB8
P01210		E9PGC8	P01008	P35606	P10599	P56537	P28300	J3KQJ1	P13645	Q9NVA2
P07737		A0A0B4J269	P06748	P62269	P11413	Q9UNW1	O75347	O60701	P13646	H0YET5
P12273		P45877	P05556	Q9Y265	Q92954	B1AHL2	Q9NR45	P17405	P02533	M0R1G9
Q32P28		Q15029	O95782	A0A087X1Z3	O60869	P27348	Q5T9B7	P51665	P08779	F5GX11
Q06323		Q6S8J3	P63244	Q13162	Q9Y237	Q5JR95	Q16643	P45877	Q04695	P22692
G3V5Z7			P51665	P55884	Q8TEA8	P62805	H7C2I1	P22307	P08727	P01833
P25787			P28066	P61812	P81605	Q9BUF5	A0A0B4J269	O14657	P35527	Q16658
P25788			A0A087WZH7	Q96FQ6	P00491	E7EQR4	P35221	Q14914	P04264	A0A087WYY1
P25789			Q9BUF5	Q10471	P17931	Q71U36	P04632	P48740	P35908	O15143
P28066			P30040	Q16394	Q13838	O00560	P24534	P01031	P19013	P61626
O14818			Q96AY3	Q14195	P40121	P61981	P80723	P47755	P13647	P62913
P20618			J3KQ32	P05556	P06576	A1L4H1	P63244	P55058	P02538	Q9BUD6
P49721			P13489	P00387	P62140	P18085	Q16610	P19367	P04259	Q16695
A0A087WUL2			P02538	P30048	Q13219	P62263	P53618	P11940	Q8N1N4	P53396
P28070			B1AK88	P07814	O75787	P50990	P47897	P26599	P05787	P04844
P28074			P61019	Q99584	A0A087WXW9	Q14764	Q13162	Q09666	F5GZN3	O75368
P28072			P49721	P49327	P53004	O15145	P05198	P05455	J9JID7	Q9UBG3
Q99436			P62424	Q14914	P48061	C9JP16	C9JFR7	P62942	P24043	Q8NBJ4
F8WCF6			J3QRS3	Q96D15	X6R8A1	P19013	Q96D15	A0A087X2I1	A0A0A0MTC7	E9PF17
Q99497			Q14195	O60701	O76003	Q14195	Q14847	Q9BX68	G3XAI2	P04899
P30101			P19022	P31939	Q13200	Q03167	P17931	P12270	P55268	P63244
P13667			G5EA09	B5MCX3	P60953	P61026	P35998	P21589	P11047	E9PRY8
Q15084			Q08629	Q6PCB0	P30048	Q96RW7	Q13838	P15531	E7EV71	Q5TD07
P07237			P21980	C9J9K3	Q8WUJ3	H7BY58	O75396	Q16706	G3V511	E7ENL6
Q8TB73			Q9HB71	Q15365	Q9UBI6	Q9BS26	O43747	Q03167	Q99538	P25398
P06702			P69905	Q14847	P05198	E9PGC8	P05387	P04062	P09960	O60869
F5H365			O43396	P04899	Q969H8	G3XAP6	P33176	Q00688	Q14847	P20933
Q08188			P31153	P24592	P22314		P61086	P09496	P00338	A0A075B6L0
P28300			Q07960	O60506	P98179		Q15181	P48643	P07195	Q08554
P00491			P01034	P43034	B1ALD9		P62140	P38646	P51884	X6R8A1
P14618			P49767	P38159	P07339		P33316	Q15365	P61626	Q96KP4
Q53FA7			P55058	P61247	P33908		P98095	J9JID7	Q08397	P01876
P50395			P28072	P62857	P68402		Q14019	A0A0A0MRV0	H0YAR1	A0A087WWA5
P35241			P60903	P53004	P60981		Q15758	J3KN29	Q9Y4K0	E5RJD8
P46940			P49720	P26885	P02649		Q9NR12	Q16222	P58215	G8JLG2
Q15404			Q6IBS0	Q7L2H7	P08254		P28482	Q9NZN4	P40121	Q99538
P61026			Q09666	P69905	E9PAV3		Q16222	V9HW75	Q14764	F8W031
Q15907			P12081	O15460	I3L3M7		P31949	O43242	P40925	O14672
P62820			A6NLN1	Q15393	P30153		Q02809	H7BYY1	P40926	Q9ULV4
P51149			O43852	P62258	P61077		P30048	P05141	P48740	H7BY58
O75787			E9PP21	E5RJD8	P04004		P30086	P20674	P33908	Q5JXB2
Q15293			O15143	P25789	Q07812		P16035	P02458	O00339	B5MDF5
Q96D15			P22692	J3QRS3	P45877		P11940	P35241	F8W1C3	P48047
P52565			Q15365	P27658	B4DY09		P55287	E7EQR4	Q9BRK3	Q9UBS4
P98179			P26885	P27824	O60506		Q04760	E7ENL6	A0A087WU86	P60953
Q9Y5S9			P24592	F6WIT2	P21589		P01008	A0A0B4J269	P01033	A0A087WZ27
O75326			P62081	B0QY89	P60903		Q14914	C9JEH7	P16035	P62258
D6RGI3			Q07954	P53621	Q02388		E7EQR4		H3BTL1	P49721
B5MCX3			P61812	P47755	P61026		Q02818		E7EVA0	Q96CG8
O95084			P68871	Q12906	P15531		P00387		P26038	C9JXA5
Q92743			Q9BT78	F2Z2Y4	A1L4H1		F8W914		Q9UNW1	B4DXW1
J3KTL2			P51148	O00487	P61981		P49588		J3QRS3	P26885
P02787			P61604	O75436	F5H4Z8		P50991		P24844	O95980
Q96P63			P13674	Q92598	Q96IU4		J3KQ32		Q7Z406	B5MCX3
P29508			Q5JR95	P62081	Q9UI42		Q13347		P35579	Q9UNW1
A0A087X1N8			H0YHX9	F8W914	P24844		P47755		A0A087WZH7	F5H6I0
P50454			P84077	P19827	P14550		Q06033		O94760	P81605
P02768			G8JLB6	O76003	P29279		D6REX3		Q9UJ70	P13646
Q04837			B0QY89	Q08629	P63000		P51148			P46777
D3DQH8			A0A087X1Z3	D6RAR4	D6RE83		Q32P28		E9PAV3	Q5VZR0
Q13813			P31939	P33908	P49755		P30043		I3L2W2	O75882
A0A087WUZ3			Q15691	E9PEB5	O60493		P02771		Q09666	P40925
O76061			Q6NZI2	J3KPF3	Q15819		Q6EMK4		Q5T7F0	Q08188
P16949			Q96KP4	Q15389	B8ZZZ0		B1AHL2		Q14697	P46940
J3KQJ1			P05387	P09429	F2Z2V0		P05455		Q15758	Q9UBG0
O00391			P04844	Q13347	Q15417		J3QRS3		Q96TA1	P08476
P78539			P15880	H0Y7Z1	Q9BTM1		O14558		P43490	H0Y7A7
O60687			P48643	P28072	G3XAP6		P25789		P14543	O75462
J3QSU6			P23381	P08254	P35241		P12277		Q14112	P62906
Q08629			Q9Y224	A0A0B4J269	P12107		F8VVA7		Q9Y266	P62269
Q8NBS9			Q9Y678	P45974			P62081		Q02818	Q13443
P30048			P17931	P25398			P07858		P19338	P40121
O43396			P24534	P18085			P19623		P06748	Q16394
P26639			O15460	P60953			Q9Y281		P15531	H3BSC1
P07996			P53618	P02765			P36405		Q32Q12	Q5D862
P35442			Q9BRK3	G8JLB6			P48163		E9PKT8	P62316
F5H4Z8			P51149	Q9UNM6			Q9Y265		D6REA1	P19367
P37837			P17813	E9PP21			Q07954		J3KQ32	P10412
P20290			P27816	P13647			P55884		Q6UWY5	P21796
P01137			Q9NYU2	Q9Y266			H7C003		Q9NRN5	P27348
P61812			A0A0B4J2C3	Q15907			Q9UIJ7		Q86UD1	P16949
Q15582			Q8NBJ4	P51149			Q76M96		Q13219	Q9BUF5
Q01995			Q9UNM6	B1AHL2			Q9BWD1		P26022	Q15758
P37802			P47755	Q99832			Q13283		Q6UXB8	Q07954
P55072			P25789	P05387			Q00688		P19021	O43184
P29401			P78417	Q96CX2			B0QY89		P62937	Q5T985
Q5W0H4			H0Y7Z1	P62701			O95373		P23284	P49411
P60174			B1AHL2	P01031			Q9UBW8		P45877	Q53FA7
P09493			P55145	A0A087X2I1			P13804		Q96AY3	J3KPX7
A0A087WWU8			Q9P0L0	B4DGU4			P40261		O95302	P78385
K7ENT6			P55884	O75396			Q9UHV9		O60664	Q03135
P67936			P58215	P61019			P15880		B1ALD9	P13497
P23381			P45974	O76061			P04899		Q15063	P69905
Q71U36			P14868	D6REX3			A0A087X082		Q92626	O75396
F5H5D3			Q53FA7	P60866			P0CW22		Q06830	H7C0V9
Q5JP53			Q96CG8	P16070			P43034		P32119	P78417
E5RJD8			P19827	Q86Y38			E9PEX6		Q13162	O60664
D6RE83			P38159	C9J3R8			O95816		P30041	A0A087X1N8
P62979			P04899	Q01813			P20700		P30086	P39656
Q9NYU2			O15145	P07686			P10599		O95394	P61160
P30085			Q14152	P61106			H0YIV4		P00558	Q14847
H3BLW8			O95394	Q9BWS9			B7Z7P8		P18669	P27824
P49767			O75436	P55145			P26885		P55058	P02649
Q6EMK4			P61106	Q07812			P31948		O15067	Q13444
O75396			O00410	O95394			P61289		Q9Y617	B1AHL2
P08670			P60953	D6RGI3			Q15417		P36955	H7C3G9
P18206			P30050	O00154			Q7Z7G0		P05155	O43854
P04004			Q02742	P04004			P60891		P05121	Q6NZI2
P21796			Q14393	Q8IXL6			P60983		P13797	D6RDX1
A0A0A0MR02			P09429	J3KQ32			J3KNQ4		Q9GZP0	P17301
O75083			B1ALD9	A0A087WZK9			O15511		Q15149	G3V5Z7
Q86Y38			Q9UJJ9	J3KQJ1			Q96CX2		Q15365	P12236
P25311			P53621	P18124			P30084		H3BRU6	P04259
Q96DA0			Q96HC4	P17813			Q9UHB6		Q6NZI2	O94760
			Q06033	G3V0E5			P23246		Q8IUC8	Q13162
			O43242	O43809			P16949		Q10471	O76061
			M0QXB4	E7ET40			J3KR44		Q7Z7M9	A0A087WXE9
			P02649	C9JFR7			P60953		Q9UHV9	P39019
			P30048	O95967			Q9HAB8		Q00888	K7EM73
			P54709	Q12792			P07686		M0R1G9	H7BYY1
			P61163	Q13219			Q9UNM6		P02545	B1AK88
			D6RGI3	P51571			Q12904		Q8TED1	Q9Y696
			P40429	O15511			P01891		Q15113	O95394
			P53004	P62244			H3BQQ9		Q9UKZ9	B4E1Z4
			P35606	A0A087X1X7			M0R0Y2		Q8NBJ5	P30043
			P21796	E9PF17			Q9P0L0		Q02809	Q14019
			P10301	Q04917			P10253		O00469	P09382
			A0A087X253	F5H4Z8			O43396		O60568	B1ALD9
			Q14914	A6NLN1			P30050		P01210	P08294
			H7BY82	E7EUF1			Q13492		P07737	Q9BRK3
			P08254	Q96AG4			P25705		P35232	P62851
			P02765	B7Z7P8			Q12841		J3KPX7	J3KT29
			Q9Y230	Q13308			H0YGL6		Q32P28	Q9NRV9
			E9PEX6	Q9Y224			O00303		P13674	Q6KB66
			O00300	A0A087X0K1			Q9Y266		O15460	P17900
			P46821	P54727			Q9UHX1		Q8NBP7	D6RAF8
			O00154	P61163			P00492		H0YMZ1	P61106
			P04004	O00410			P69905		G3V5Z7	P47755
			D6RHI9	P05198			P41091		P25786	A0A087WV45
			P48047	O00303			O60763		P25787	H0Y8C6
			Q9BS26	Q9UBG0			P49755		P25788	Q96P63
			O00339	P68402			Q99460		P28066	Q99832
			Q96D15	P30050			E7EPZ9		O14818	P04004
			P62140	P05023			A0A0A0MTN3		P20618	Q07666
			O76061	P22234			Q9NQR4		P49721	Q6P452
			C9JP16	P20908			Q99879		P28070	P02452
			P06756	B5MDF5			Q9BSJ8		P28074	A0A087WYV8
			K7ELL7	O95084			P30520		P28072	H0YGS3
			H0YKC5	Q96RW7			P23142		Q99436	Q5TCU8
			P62906	Q13404			O15498		F8WCF6	P05089
			P51991	Q96QK1			P54727		A0A087WVM3	O75449
			Q15046	P62913			Q13561		Q99497	P02538
			O43809	P61604			P10301		P30101	P68133
			Q13308	P10301			A0A0B4J2A4		P13667	Q71U36
			P18065	P23526			O14980		Q15084	P15531
			P51571	P40429			E5RJR5		P07237	P08123
			P62913	P45877			P46777		Q92520	F8VU65
			Q8WUM4	P49767			P07954		P55735	Q9UHV9
			C9JFR7	P19021			P35555		Q9ULL8	P18085
			P27695	Q9BVK6			E7EX17		F5H365	P01040
			P62258	B1ALD9			P26447		P28300	Q6P4A8
			P62244	Q96CG8			P27105		D6RFM1	P35241
			Q14019	P39656			Q12765		Q9HCL0	Q9BTM1
			J3QQT2	Q96QR8			P27824		P55786	P51688
			O00232	P30044			P19827		Q8NHP8	Q14532
			Q5HYB6	Q14019			P55060		H3BTN5	P48723
			D6REA1	O60687			O75340		P14618	F8VZY9	AMSC D13 com751 P08123 P12111 P02452 P08670 P98160 P02461 Q15063 A0A087X0S5 Q15582 P01024 P11021 P02545 P12814 P08253 P05121 A0A0A0MTC7 P07093 O00391 P07996 P30101 P26038 P11047 P07585 Q92626 P50454 G3XAI2 P18206 O43707 P14625 P12110 P06733 P09871 Q14315 Q02818 P63261 P36955 P20908 P04264 P08107 P07355 P07237 P55072 E7EUF1 P10909 Q76M96 P14618 P07900 P35555 P67936 P55268 P00338 P53396 J3KPS3 P111…
			F2Z2V0	P68871			Q14232		Q53FA7	P10915
			Q99538	I3L3M7			C9JBI3		P31150	P61353
			Q14118	F8VVA7			P17612		P50395	P33778
			P40121	P07711			P62195		P35241	E5RI99
			Q7L2H7	P05546			Q7L2H7		P46940	P62820
			D6RBV2	Q9BS26			P54709		P61026	G3V1M9
			G5E971	Q8TEA8			Q9H008		Q15907	P49767
			O76003	Q16543			P35232		P51153	Q13347
			B5MDF5	Q9ULZ3			P62263		P61106	P07711
			P43034	H3BR35			P16070		A0A087WTI1	Q13011
			P07339	P46783			P05556		Q15286	O00754
			P49411	P62316			H3BT71		P20337	Q9BVA1
			P07711	P61088			P01111		P51148	P25940
			Q14703	H3BPE7			P51665		P20340	P21781
			P25398	P42357			Q9UBG0		P51149	Q63ZY3
			P62857	P50281			Q8IXB1		F5H7Y6	P24539
			Q15758	P14550			O43583		P62070	Q96IU4
			Q9BSJ8	P18065			Q15365		Q15293	A0A0A0MR02
			E7ETK0	P24539			P14868		Q96D15	Q9BX68
			P68402	P30040			P62993		O95256	P51153
			H7C2I1	P00390			P46108		A6NNT2	P17987
			Q96CX2	F5GXX5			A0A087X020		J3QQX2	Q9Y281
			Q12792	P40261			Q5H9A7		P13489	Q09666
			Q8WVC2	P46781			Q96AG4		J3QR09	A6NNT2
			Q9Y5S9	Q7Z7M9			P56537		P31153	P05546
			Q8WVQ1	P62906			Q9UGI8		Q12765	P05787
			P60866	Q9Y5S9			O14498		O75326	P19013
			P56537	Q9UBI6			P98179		D6RGI3	O00469
			P05154	F8VPD4			Q07065		B5MCX3	P45877
			P20290	P53999			P39019		E7ES33	P68371
			P98179	Q16531			Q15393		Q9UHD8	Q9H6B4
			Q9HCU0	P50148			Q86UP2		O95084	Q14195
			P68371	Q96A72			Q01970		Q92743	P20340
			P39656	P52597			Q9P2J5		J3KTL2	P08729
			P50281	B4DUT8			P62244		J3QL05	E7EQR4
			O95967	E9PGZ1			P05141		C9JAB2	H0YAR1
			Q01813	P48163			Q16531		P42345	O76009
			P49327	Q04760			Q08211		Q9BRF8	P17066
			P62195	P30084			B4DGU4		Q96P63	E9PS42
			P21399	G5E9Q6			Q6UVK1		A0A087X1N8
			O00487	Q8WVC2			Q96FQ6		P50454
			Q8IXB1	Q6NZI2			X6RA14		P02768
			P16615	Q92973			P14324		E7EUY5
			P84103	P36542			P04843		P62316
			P30084	P62851			P29992		P61956
			A0A087X0K1	Q92905			Q16401		P05023
			G5E9Q6	Q5TG12			P30740		Q8WVQ1
			P10646	Q15691			Q92688		D3DQH8
			P62266	Q9UHV9			Q9BUF5		Q13813
			Q96QR8	P15880			Q13308		Q01082
			B5MCZ3	P10643			E7EM64		P19623
			P50552	Q14118			P60903		Q5STU3
			Q15717	Q9HCU0			P36578		Q15393
			P62851	P54578			Q96P70		Q9BUD6
			Q99536	P61026			P54136		Q14247
			Q96AG4	G3XAM2			O95881		O76061
			P54727	P27348			P46783		P16949
			Q9NR12	Q96HE7			Q9ULC3		A0A087WYB4
			P01031	P98179			Q08380		P38646
			B4DUT8	P60903			P43490		P08254
			P07686	Q9NZN4			Q9UNS2		P55809
			P45877	Q9Y281			Q96CN7		J3KQJ1
			Q06323	P68371			P00390		O00391
			P17612	P08779			X6R8A1		P78539
			P62873	J3QSU6			A0A0A0MR02		O60687
			Q00688	Q71U36			P62851		Q99536
			P80723	Q9BVA1			O43143		Q9Y490
			P38646	P15531			P62913		D3YTG3
			J3KTL2	Q9H0U4			Q9BRK3		P17987
			Q641Q3	Q96QV6			P43686		P78371
			H7C2R7	A1L4H1			Q92626		P50991
			G3XAP6	P02538			P10644		P48643
			Q96HE7	P12259			P17858		Q99832
			Q06210	P32321			C9J712		P49368
			A0A0A0MTS2	P02748			Q9BS40		P50990
			E9PF17	Q9UHD8			O43242		P40227
			D6RE83	O60493			Q9NYU2		P24821
			Q07812	P61353			Q96C19		A0A0A0MRT1
			Q16706	Q9BRK3			P31153		P22105
			Q99436	P05154			Q96QR8		Q08629
			Q00839	P31946			A0A087X054		H0YEE2
			Q92973	P36405			Q99598		Q8NBS9
			Q6P452	P24844			E9PR44		F8W809
			Q02978	E9PKZ0			Q8WWM9		P30048
			B4DKY1	P07339			O00571		O43396
			J3KPF3	P24666			P68402		P26639
			F8W1I6	P12236			P35611		P07996
			P53999	H3BQQ9			P04844		P35442
			Q99714	P62318			Q5U5J2		F5H4Z8
			Q9UHI8	A0A087X1N8			P51991		P37837
			H0Y2Y8	P61981			P61077		P02786
			Q9UBI6	Q16778			Q15113		P01137
			Q16531	G3XAP6			P60866		Q15582
			P00403	A0A087WY71			O60888		Q01995
			Q14847	P30043			J3QRJ3		P37802
			Q9UHV9	P00403			O95486		P55072
			O43399	P02649			P35052		P29401
			F5H6E2	P48061			Q9UNZ2		Q92973
			P62318	F8W1A4			Q96HC4		P60174
			P04632	P24593			Q92520		H7BYY1
			P30043	Q9BUF5			Q9BUH6		P09493
			Q8TEA8	P63000			D3DQH8		A0A087WWU8
			P61026	Q04837			P04080		P67936
			P05386	P15121			D6RAR4		Q5TCU3
			O15511	E9PF18			P62318		P23381
			H7BYY1	P51153			A0A0A0MTN0		Q71U36
			P62750	J9JID7			P09496		F5H5D3
			Q15907	Q96SL4			E9PF82		Q5JP53
			P12270	H0YAR1			P48147		Q9BVA1
			Q9NR31	Q3BDU5			Q9UFN0		P68371
			A0A087WTP3	P62140			Q8WUM4		Q9BUF5
			P54136	P84077			Q12906		E5RJD8
			Q9Y281				P62888		Q12792
			Q9Y266				Q6YHK3		P30530
			P09493				A6NFX8		P62987
			B7Z7P8				P02792		P61088
			A0A087X0R6				Q9BUT1		Q13404
			A0A0B4J269				P11766		P22314
			Q15102				Q08257		O60701
			P00390				Q99426		Q9NYU2
			Q05707				Q99961		Q16222
			D6REX3				Q9Y230		F8W031
			D6RAR4				P61586		B4E1Z4
			J3QSU6				Q9BUL8		Q969H8
			Q71U36				P63000		O75436
			P05141				O15400		P49767
			Q9H0U4				Q9HCU0		Q6EMK4
			Q10567				P51809		E9PF17
			A0A087X2I1				P07741		O75396
			A1L4H1				Q9Y680		Q12907
			O95450				Q92905		P08670
			P00367				Q15370		P18206
			Q9BVK6				Q92598		P04004
			K7ERI7				P68871		P21796
			Q9BVA1				Q7Z4H8		A0A0A0MR02
			P61088				P49411		O75083
			P61981				O95394		Q86Y38
			P04259				P39023		Q96DA0
			O75396				P61106
			Q96IU4				Q969H8
			A0A0A0MRJ7				P22307
			Q9P2J5				P62906
			P00492				P84103
			Q9GZP4				H3BTL1
			R4GN98				Q96C90
			Q9NZN4				Q15717
			Q92747				P09619
			Q96FQ6				Q10567
			A0A087WTM7				P35520
			P48723				Q9BS26
			P52597				J3KQJ1
			Q92598				Q9NR31
			E7ETU9				A2A274
			P15531				P02794
			P18085				G8JLB6
			E9PEB5				Q6P587
			Q13347				K4DI93
			C9J1Z8				P53999
			C9JAB2				P49915
			Q04760				P24592
			Q04695				P54577
			Q15393				P01031
			P24844				Q02878
			P20340				F2Z2Y4
			P04278				Q9NZU5
			P21964				B4DLR8
			E7EST9				Q96M27
			P14923				Q92597
			Q9Y3B3				A0A087WY71
			Q92520				O94973
			Q93077				P06756
							Q9NYL9
							Q5JXI8
							P55268
							A0A087WUT6
							P61604
							Q9UJU6
							O15116
							O75937
							Q99584
							P18085
							O15173
							Q9Y4K0
							P21796
							E5RHG8
							Q00765
							H0Y8X4
							Q15121
							P45877
							P12004
							Q9BRG1
							Q15819
							O00487
							Q99613
							P51571
							O94855
							P12270
							P62424
							F8W031
							Q9H4A4
							P24752
							A0A0A0MRI2
							Q9BRF8
							A0A087WWM0
							P52788
							Q2TAA2
							Q14240
							P26196
							P55263
							O60493
							Q9H8S9
							Q00577
							E9PGT6
							P20337
							Q9ULZ3
							A2ACR1
							P21810
							V9HW75
							Q04837
							P37108
							P19367
							P20290
							Q9H0U4
							P26640
							P42126
							Q13011
							P55735
							P00966
							P52895
							O14974
							A0A024R4E5
							Q8TEA8
							P15848
							Q9Y4G6
							P07942
							P25398
							J3KPX7
							O95433
							P11279
							P35270
							P48507
							Q07812
							Q00169
							P61020
							Q5VTU3
							Q9UL25
							Q96HY6
							Q16270
							H0YN81
							P40306
							P07711
							E9PHK0
							J3KRC4
							H0YDL9
							Q92882
							P00403
							J3KN29
							P62750
							Q03135
							P62942
							A0A087WUF6
							A0A0A0MSW4
							H7BXI1
							J3QQ67
							P53004
							Q9UBT2
							Q8WVC2
							Q9Y5S9
							O00505
							Q13185
							P08243
							F8VXU5
							P62316
							P48449
							Q9ULC4
							P20339
							P14550
							Q7L523
							P02649
							P00367
							P62873
							P35580
							P15374
							D6RBW1
							E7ENL6
							Q9GZP4
							Q15637
							Q9BRA2
							P17900
							P13861
							F6TLX2
							P09012
							Q63ZY3
							P21399
							H7C1E4
							P01034
							Q96DE0
							O60869
							Q8NC51
							A0A087X2I1
							A0A0A0MSW0
							P24666
							Q12805
							G3V4W4
							A0A024R571
							Q86Y82
							Q5VZR0
							K7ERF1
							Q8TAT6
							Q8NBJ5
							A0A087WYU1
							G3V511
							Q5VY30
							Q96F85
							Q5TEC6
							Q9H488
							P05386
							Q9BR76
							P05543
							P61026
							A0A0A0MTC7
							O60565
							Q99733
							P61758
							Q9UMS4
							Q99714
							B4DUT8
							O00203
							Q92973
							Q15233
							O00232
							P48426
							O95302
							P09493
							P62191
							Q96T76
							Q93008
							P17936
							Q3BDU5
							P27361
							Q08945
							P51153
							P26583
							Q9NTX5
							Q9NSD9
							Q9NVS9
							E9PDF6
							Q9BRK5
							P02647
							A0A087WUL0
							P21281
							Q96JB5
							Q8IWE2
							Q5JR08
							P62854
							P04004
							P50995
							Q7L1Q6
							P51572
							P53367
							P01042
							A8MXP9
							Q14CX7
							E9PGZ1
							Q71U36
							P15531
							Q9BTM1
							P52597
							Q9Y6B6
							P20338
							P62304
							H9KV48
							P68371
							P15927
							C9JIZ6
							P12236
							O00442
							P14735
							P38919
							Q96DB5
							P09497
							P20340
							Q53GQ0
							O43390
							Q93077
							Q15382
							Q15029
							Q9BY32
							O75131
							G5E9Q6
							P53992
							A0A087X0R6
							E9PC52
							Q14108
							H3BTN5
							Q5JWF2
							P39656
							Q9UBF2
							Q5T4S7
							H0Y390
							Q92616
							Q7Z6Z7
							Q14008
							P63261
							P24844
							P11233
							P41219
