# Supplementary material for: Unbiased analysis of senescence associated secretory phenotype (SASP) to identify common components following different genotoxic stresses
Source: Aging (Albany NY). 2016 Jun 9;8(7):1316–27. doi: 10.18632/aging.100971 (PMC4993333; doi:10.18632/aging.100971)
Supplement: Supplementary file 5 [file aging-08-1316-s005.xls]

## Sheet: BM MSC REP
© 2000-2016 QIAGEN. All rights reserved.
Ingenuity Canonical Pathways	-log(p-value)	Ratio	z-score	Molecules
Hepatic Fibrosis / Hepatic Stellate Cell Activation	1,85E01	1,64E-01	NaN	IGFBP4,TGFB1,MMP2,COL6A1,CTGF,COL1A1,MYH9,A2M,COL12A1,FN1,IGFBP3,VEGFC,COL4A1,COL6A3,VEGFA,COL3A1,TGFB2,COL1A2,COL8A1,MYL9,COL6A2,COL5A1,TIMP2,MYL6,COL5A2,COL4A2,COL2A1,TIMP1,SERPINE1,MMP1
Remodeling of Epithelial Adherens Junctions	1,27E01	2,35E-01	NaN	IQGAP1,ACTR2,ARPC3,VCL,TUBB,ACTN1,TUBA1C,NME1,ARPC1B,ACTR3,ARPC2,ARPC5,RAB7A,TUBA1A,ACTA1,ACTN4
RhoGDI Signaling	1,23E01	1,33E-01	NaN	CDH2,CDC42,ACTR2,ARPC3,EZR,MYL12A,MSN,GDI2,GNB1,MYL9,ARPC1B,ACTR3,RDX,CFL2,GNB2,ARPC2,MYL6,ARPC5,GNAI2,CFL1,ITGB1,ARHGDIA,ACTA1
Signaling by Rho Family GTPases	1,19E01	1,11E-01	NaN	IQGAP1,CDH2,CDC42,ACTR2,GNB1,ARPC1B,VIM,ARPC5,GNAI2,CFL1,SEPT11,ITGB1,ARPC3,EZR,MYL12A,MSN,MYL9,ACTR3,SEPT2,STMN1,CFL2,RDX,GNB2,ARPC2,MYL6,ACTA1
Epithelial Adherens Junction Signaling	1,19E01	1,44E-01	NaN	IQGAP1,CDH2,CDC42,ACTR2,ARPC3,VCL,TUBB,JUP,TGFB2,MYL9,ACTN1,TUBA1C,ARPC1B,ACTR3,MYH9,ARPC2,MYL6,ARPC5,TUBA1A,ACTA1,ACTN4
Actin Cytoskeleton Signaling	1,19E01	1,15E-01	NaN	IQGAP1,CDC42,ACTR2,VCL,ARPC1B,MYH9,ARPC5,FN1,CFL1,PFN1,ITGB1,ACTN4,ARPC3,FLNA,EZR,MYL12A,MSN,ACTN1,MYL9,ACTR3,CFL2,RDX,ARPC2,MYL6,ACTA1
RhoA Signaling	1,05E01	1,48E-01	NaN	ACTR2,ARPC3,EZR,MYL12A,MSN,MYL9,ARPC1B,ACTR3,SEPT2,RDX,CFL2,ARPC2,MYL6,ARPC5,CFL1,PFN1,SEPT11,ACTA1
ILK Signaling	9,89E00	1,13E-01	NaN	FLNB,CDC42,VCL,VEGFA,FLNA,RSU1,DSP,MYL9,ACTN1,CFL2,MYH9,KRT18,VIM,MYL6,FN1,CFL1,ITGB1,FLNC,ACTA1,ACTN4,VEGFC
Protein Ubiquitination Pathway	9,56E00	9,41E-02	NaN	PSMB6,PSMA4,UCHL1,HSP90B1,PSMA6,HSPD1,PSMA3,PSMB5,PSME1,PSMB1,HSPB1,HSPA4,PSMA7,PSMB4,PSMD9,HSPA8,PSMB7,HSPA5,PSMA2,PSMB2,PSMB3,HSP90AB1,HSP90AA1,PSMA5
Regulation of Actin-based Motility by Rho	9,55E00	1,65E-01	NaN	CDC42,ACTR2,ARPC3,MYL12A,MYL9,ACTR3,ARPC1B,ARPC2,MYL6,ARPC5,CFL1,PFN1,ITGB1,ARHGDIA,ACTA1
Clathrin-mediated Endocytosis Signaling	8,31E00	1,03E-01	NaN	CDC42,ACTR2,TF,ARPC3,VEGFA,CLTC,ARPC1B,ACTR3,ARPC2,ARPC5,RAB7A,CLTA,HSPA8,CLU,ITGB1,ACTA1,RAB11B,VEGFC,ALB
Glycolysis I	7,77E00	3,2E-01	NaN	TPI1,PGAM1,ENO2,PGK1,PKM,GAPDH,ENO1,GPI
Gluconeogenesis I	7,77E00	3,2E-01	NaN	PGAM1,ENO2,PGK1,GAPDH,MDH2,ENO1,MDH1,GPI
Germ Cell-Sertoli Cell Junction Signaling	7,72E00	1,06E-01	NaN	IQGAP1,CDH2,CDC42,TGFB1,VCL,TUBB,JUP,TGFB2,ACTN1,TUBA1C,CFL2,A2M,TUBA1A,CFL1,ITGB1,ACTA1,ACTN4
Axonal Guidance Signaling	7,35E00	6,45E-02	NaN	CDC42,ACTR2,MMP2,GNB1,TUBA1C,ARPC1B,ARPC5,GNAI2,TUBA1A,CFL1,PFN1,ITGB1,SEMA7A,VEGFC,ARPC3,TUBB,VEGFA,MYL12A,DPYSL2,MYL9,ACTR3,CFL2,GNB2,ARPC2,MYL6,BMP1,NRP1,PDIA3
Ephrin Receptor Signaling	5,71E00	8,62E-02	NaN	CDC42,ACTR2,ARPC3,VEGFA,GNB1,ARPC1B,ACTR3,CFL2,GNB2,ARPC2,ARPC5,GNAI2,CFL1,ITGB1,VEGFC
Leukocyte Extravasation Signaling	5,68E00	8,08E-02	NaN	CDC42,MMP2,VCL,EZR,MSN,ACTN1,EDIL3,RDX,TIMP2,MYL6,GNAI2,ITGB1,TIMP1,ACTA1,ACTN4,MMP1
IGF-1 Signaling	5,48E00	1,13E-01	NaN	IGFBP4,YWHAQ,YWHAG,IGFBP7,CTGF,IGFBP3,YWHAE,YWHAZ,YWHAH,YWHAB,IGFBP6
EIF2 Signaling	5,38E00	8,11E-02	NaN	RPS18,RPLP2,EIF3B,EIF3I,RPS14,RPS20,RPS12,RPSA,RPL12,RPS19,RPL5,RPLP0,EIF4A1,RPS27A,RPL10A
Cdc42 Signaling	5,23E00	8,38E-02	NaN	IQGAP1,CDC42,ACTR2,ARPC3,MYL12A,MYL9,ACTR3,ARPC1B,CFL2,ARPC2,MYL6,ARPC5,CFL1,ITGB1
Rac Signaling	5,18E00	1,06E-01	NaN	ARPC2,ARPC5,IQGAP1,CDC42,ACTR2,CFL1,ARPC3,ITGB1,ACTR3,ARPC1B,CFL2
Inhibition of Matrix Metalloproteases	5,01E00	1,79E-01	NaN	A2M,MMP2,THBS2,HSPG2,TIMP1,MMP1,TIMP2
Actin Nucleation by ARP-WASP Complex	4,88E00	1,43E-01	NaN	ARPC2,ARPC5,CDC42,ACTR2,ARPC3,ITGB1,ACTR3,ARPC1B
Fcγ Receptor-mediated Phagocytosis in Macrophages and Monocytes	4,83E00	1,08E-01	NaN	ARPC2,ARPC5,CDC42,ACTR2,ARPC3,EZR,ACTA1,RAB11B,ACTR3,ARPC1B
14-3-3-mediated Signaling	4,69E00	9,4E-02	NaN	VIM,YWHAQ,TUBA1A,YWHAG,TUBB,PDIA3,TUBA1C,YWHAE,YWHAZ,YWHAH,YWHAB
Acute Phase Response Signaling	4,5E00	7,69E-02	NaN	TF,C3,SERPINF1,HNRNPK,C1R,A2M,C4A/C4B,FN1,SERPINE1,C1S,AHSG,SERPING1,ALB
Integrin Signaling	4,32E00	6,97E-02	NaN	CDC42,ACTR2,ARPC3,VCL,MYL12A,MYL9,ACTN1,ARPC1B,ACTR3,ARPC2,ARPC5,ITGB1,ACTA1,ACTN4
Sertoli Cell-Sertoli Cell Junction Signaling	4,26E00	7,3E-02	NaN	CDC42,VCL,TUBB,JUP,ACTN1,TUBA1C,SPTBN1,A2M,TUBA1A,ITGB1,ACTA1,ACTN4,SPTAN1
fMLP Signaling in Neutrophils	4,26E00	9,26E-02	NaN	ARPC2,ARPC5,GNAI2,CDC42,ACTR2,ARPC3,GNB1,ACTR3,ARPC1B,GNB2
Complement System	4,11E00	1,62E-01	NaN	C4A/C4B,C3,C1S,C1R,SERPING1,CFH
Unfolded protein response	4,06E00	1,3E-01	NaN	HSPA4,HSPA8,HSP90B1,HSPA5,CANX,VCP,P4HB
Myc Mediated Apoptosis Signaling	3,86E00	1,21E-01	NaN	YWHAQ,YWHAG,CYCS,YWHAE,YWHAZ,YWHAH,YWHAB
Regulation of eIF4 and p70S6K Signaling	3,81E00	7,53E-02	NaN	RPS19,RPS18,ITGB1,EIF4A1,RPS27A,EIF3B,EIF3I,RPS14,RPS20,RPS12,RPSA
PI3K/AKT Signaling	3,79E00	8,13E-02	NaN	YWHAQ,YWHAG,ITGB1,HSP90B1,HSP90AB1,YWHAE,YWHAZ,HSP90AA1,YWHAH,YWHAB
Intrinsic Prothrombin Activation Pathway	3,63E00	1,72E-01	NaN	COL3A1,COL1A2,COL2A1,COL1A1,SERPINC1
Protein Kinase A Signaling	3,59E00	4,92E-02	NaN	FLNB,YWHAQ,YWHAG,TGFB1,FLNA,MYL12A,GNB1,TGFB2,MYL9,YWHAE,YWHAH,GNB2,MYL6,GNAI2,PDIA3,FLNC,YWHAZ,APEX1,YWHAB
Role of Tissue Factor in Cancer	3,48E00	8,18E-02	NaN	CDC42,CFL1,VEGFA,ITGB1,CTGF,VEGFC,MMP1,CFL2,P4HB
mTOR Signaling	3,43E00	6,38E-02	NaN	RPS19,VEGFA,RPS18,EIF4A1,RPS27A,EIF3B,EIF3I,VEGFC,RPS14,RPS20,RPS12,RPSA
Virus Entry via Endocytic Pathways	3,43E00	8,99E-02	NaN	FLNB,CDC42,CLTA,FLNA,ITGB1,CLTC,FLNC,ACTA1
Cell Cycle: G2/M DNA Damage Checkpoint Regulation	3,41E00	1,22E-01	NaN	YWHAQ,YWHAG,YWHAE,YWHAZ,YWHAH,YWHAB
Agranulocyte Adhesion and Diapedesis	3,41E00	6,35E-02	NaN	MYL6,GNAI2,FN1,MMP2,ITGB1,EZR,MSN,MYL9,ACTA1,MMP1,RDX,MYH9
Guanine and Guanosine Salvage I	3,41E00	1E00	NaN	PNP,HPRT1
Ephrin B Signaling	3,23E00	9,59E-02	NaN	GNAI2,CDC42,CFL1,HNRNPK,GNB1,CFL2,GNB2
p70S6K Signaling	3,23E00	7,56E-02	NaN	GNAI2,YWHAQ,YWHAG,PDIA3,YWHAE,YWHAZ,YWHAH,EEF2,YWHAB
Semaphorin Signaling in Neurons	3,23E00	1,13E-01	NaN	CFL1,ITGB1,NRP1,SEMA7A,DPYSL2,CFL2
LXR/RXR Activation	3,18E00	7,44E-02	NaN	C4A/C4B,TF,VTN,C3,SERPINF1,CLU,AHSG,PLTP,ALB
Atherosclerosis Signaling	3,1E00	7,26E-02	NaN	PRDX6,TGFB1,CLU,COL3A1,COL1A2,COL2A1,COL1A1,MMP1,ALB
Aldosterone Signaling in Epithelial Cells	3,05E00	6,58E-02	NaN	HSPB1,HSPA4,HSPA8,HSP90B1,HSPA5,HSPD1,PDIA3,HSP90AB1,HSP90AA1,AHCY
HIF1α Signaling	3,03E00	7,84E-02	NaN	MMP2,VEGFA,LDHA,HSP90AA1,APEX1,VEGFC,MMP1,LDHB
FXR/RXR Activation	3,03E00	7,09E-02	NaN	C4A/C4B,TF,VTN,C3,SERPINF1,CLU,AHSG,PLTP,ALB
Pentose Phosphate Pathway	2,95E00	2,73E-01	NaN	TKT,PGLS,TALDO1
ERK5 Signaling	2,83E00	9,52E-02	NaN	YWHAQ,YWHAG,YWHAE,YWHAZ,YWHAH,YWHAB
Hypoxia Signaling in the Cardiovascular System	2,76E00	9,23E-02	NaN	VEGFA,HSP90B1,LDHA,HSP90AB1,HSP90AA1,P4HB
PAK Signaling	2,72E00	7,87E-02	NaN	MYL6,CDC42,CFL1,ITGB1,MYL12A,MYL9,CFL2
Huntington's Disease Signaling	2,69E00	5,24E-02	NaN	HSPA4,CLTA,HSPA8,PENK,CLTC,HSPA5,GNB1,PSME1,CYCS,CTSD,ATP5B,GNB2
VEGF Signaling	2,64E00	7,61E-02	NaN	VCL,VEGFA,ACTN1,ACTA1,ACTN4,YWHAE,VEGFC
phagosome maturation	2,58E00	6,67E-02	NaN	PRDX6,TUBA1A,RAB7A,TUBB,CANX,PRDX2,TUBA1C,PRDX1
Caveolar-mediated Endocytosis Signaling	2,56E00	8,45E-02	NaN	FLNB,FLNA,ITGB1,FLNC,ACTA1,ALB
Glucocorticoid Receptor Signaling	2,48E00	4,73E-02	NaN	TGFB1,HSP90B1,TGFB2,YWHAH,ANXA1,A2M,HSPA4,HSPA8,HSPA5,SERPINE1,HSP90AB1,HSP90AA1,MMP1
Parkinson's Signaling	2,45E00	1,88E-01	NaN	PARK7,UCHL1,CYCS
Inhibition of Angiogenesis by TSP1	2,37E00	1,18E-01	NaN	TGFB1,VEGFA,HSPG2,THBS1
Regulation of Cellular Mechanics by Calpain Protease	2,28E00	8,77E-02	NaN	VCL,ITGB1,EZR,ACTN1,ACTN4
Pyruvate Fermentation to Lactate	2,26E00	3,33E-01	NaN	LDHA,LDHB
Pentose Phosphate Pathway (Non-oxidative Branch)	2,26E00	3,33E-01	NaN	TKT,TALDO1
Antigen Presentation Pathway	2,23E00	1,08E-01	NaN	PSMB6,PDIA3,CANX,PSMB5
Tight Junction Signaling	2,22E00	5,39E-02	NaN	MYL6,CDC42,TGFB1,VCL,TGFB2,MYL9,ACTA1,MYH9,SPTAN1
Aryl Hydrocarbon Receptor Signaling	2,18E00	5,71E-02	NaN	HSPB1,TGFB1,HSP90B1,TGFB2,HSP90AB1,GSTP1,CTSD,HSP90AA1
HIPPO signaling	2,15E00	6,98E-02	NaN	YWHAQ,YWHAG,YWHAE,YWHAZ,YWHAH,YWHAB
eNOS Signaling	2,14E00	5,63E-02	NaN	HSPA4,HSPA8,VEGFA,HSP90B1,HSPA5,HSP90AB1,HSP90AA1,VEGFC
Adenine and Adenosine Salvage III	2,12E00	2,86E-01	NaN	PNP,HPRT1
Aspartate Degradation II	2,12E00	2,86E-01	NaN	MDH2,MDH1
Pyrimidine Deoxyribonucleotides De Novo Biosynthesis I	2,05E00	1,36E-01	NaN	CMPK1,NME1,AK1
CD28 Signaling in T Helper Cells	2,05E00	5,93E-02	NaN	ARPC2,ARPC5,CDC42,ACTR2,ARPC3,ACTR3,ARPC1B
Airway Pathology in Chronic Obstructive Pulmonary Disease	2E00	2,5E-01	NaN	MMP2,MMP1
TCA Cycle II (Eukaryotic)	2E00	1,3E-01	NaN	FH,MDH2,MDH1
IL-8 Signaling	1,96E00	4,89E-02	NaN	IQGAP1,GNAI2,MMP2,VEGFA,GNB1,MYL9,LASP1,VEGFC,GNB2
Agrin Interactions at Neuromuscular Junction	1,94E00	7,25E-02	NaN	CDC42,ITGB1,LAMC1,ACTA1,DAG1
UDP-N-acetyl-D-galactosamine Biosynthesis II	1,9E00	2,22E-01	NaN	HK1,GPI
Cardiac Hypertrophy Signaling	1,88E00	4,48E-02	NaN	HSPB1,MYL6,GNAI2,TGFB1,MYL12A,GNB1,TGFB2,PDIA3,MYL9,GNB2
Paxillin Signaling	1,83E00	5,94E-02	NaN	CDC42,VCL,ITGB1,ACTN1,ACTA1,ACTN4
Pyrimidine Ribonucleotides Interconversion	1,72E00	1,03E-01	NaN	CMPK1,NME1,AK1
Acetyl-CoA Biosynthesis III (from Citrate)	1,71E00	1E00	NaN	ACLY
Xanthine and Xanthosine Salvage	1,71E00	1E00	NaN	PNP
phagosome formation	1,68E00	5,5E-02	NaN	FN1,VTN,ITGB1,MRC2,PDIA3,MARCKS
Pyrimidine Ribonucleotides De Novo Biosynthesis	1,64E00	9,68E-02	NaN	CMPK1,NME1,AK1
Granulocyte Adhesion and Diapedesis	1,61E00	4,52E-02	NaN	HSPB1,GNAI2,MMP2,ITGB1,EZR,MSN,MMP1,RDX
Glioma Invasiveness Signaling	1,59E00	7,02E-02	NaN	VTN,MMP2,TIMP1,TIMP2
Heparan Sulfate Biosynthesis	1,59E00	7,02E-02	NaN	PRDX6,EXT1,EXT2,XYLT1
Guanosine Nucleotides Degradation III	1,58E00	1,54E-01	NaN	PNP,NT5E
Bladder Cancer Signaling	1,54E00	5,75E-02	NaN	MMP2,VEGFA,THBS1,VEGFC,MMP1
TGF-β Signaling	1,54E00	5,75E-02	NaN	INHBA,CDC42,TGFB1,TGFB2,SERPINE1
Neuregulin Signaling	1,52E00	5,68E-02	NaN	ITGB1,HSP90B1,DCN,HSP90AB1,HSP90AA1
Urate Biosynthesis/Inosine 5'-phosphate Degradation	1,52E00	1,43E-01	NaN	PNP,NT5E
Coagulation System	1,51E00	8,57E-02	NaN	A2M,SERPINE1,SERPINC1
Telomere Extension by Telomerase	1,46E00	1,33E-01	NaN	HNRNPA1,HNRNPA2B1
Death Receptor Signaling	1,45E00	5,43E-02	NaN	HSPB1,ACTA1,CYCS,LMNA,SPTAN1
Breast Cancer Regulation by Stathmin1	1,44E00	4,19E-02	NaN	GNAI2,TUBA1A,CDC42,TUBB,GNB1,TUBA1C,STMN1,GNB2
Adenine and Adenosine Salvage I	1,41E00	5E-01	NaN	PNP
tRNA Charging	1,39E00	7,69E-02	NaN	TARS,HARS,WARS
Mitotic Roles of Polo-Like Kinase	1,39E00	6,06E-02	NaN	TGFB1,HSP90B1,HSP90AB1,HSP90AA1
Cellular Effects of Sildenafil (Viagra)	1,37E00	4,65E-02	NaN	MYL6,MYL12A,PDIA3,MYL9,ACTA1,MYH9
Adenosine Nucleotides Degradation II	1,36E00	1,18E-01	NaN	PNP,NT5E
Phospholipase C Signaling	1,34E00	3,8E-02	NaN	PEBP1,MYL6,ITGB1,MYL12A,GNB1,MYL9,MARCKS,AHNAK,GNB2
Nitric Oxide Signaling in the Cardiovascular System	1,32E00	5E-02	NaN	VEGFA,HSP90B1,HSP90AB1,HSP90AA1,VEGFC
Renal Cell Carcinoma Signaling	1,29E00	5,63E-02	NaN	CDC42,TGFB1,VEGFA,FH
Diphthamide Biosynthesis	1,24E00	3,33E-01	NaN	EEF2
Trehalose Degradation II (Trehalase)	1,24E00	3,33E-01	NaN	HK1
NADH Repair	1,24E00	3,33E-01	NaN	GAPDH
Hypusine Biosynthesis	1,24E00	3,33E-01	NaN	EIF5A
Thyroid Hormone Biosynthesis	1,24E00	3,33E-01	NaN	CTSD
Granzyme A Signaling	1,23E00	1E-01	NaN	NME1,APEX1
Purine Nucleotides Degradation II (Aerobic)	1,23E00	1E-01	NaN	PNP,NT5E
Pancreatic Adenocarcinoma Signaling	1,23E00	4,72E-02	NaN	CDC42,TGFB1,VEGFA,TGFB2,VEGFC
Calcium Signaling	1,2E00	3,93E-02	NaN	MYL6,TPM3,TPM4,MYL9,ACTA1,TPM1,MYH9
Endoplasmic Reticulum Stress Pathway	1,2E00	9,52E-02	NaN	HSP90B1,HSPA5
VDR/RXR Activation	1,17E00	5,13E-02	NaN	SERPINB1,TGFB2,IGFBP3,IGFBP6
Ephrin A Signaling	1,16E00	6,25E-02	NaN	CDC42,CFL1,CFL2
Androgen Signaling	1,16E00	4,5E-02	NaN	GNAI2,HSPA4,GNB1,HSP90AA1,GNB2
Heparan Sulfate Biosynthesis (Late Stages)	1,12E00	6E-02	NaN	PRDX6,EXT1,EXT2
Arsenate Detoxification I (Glutaredoxin)	1,12E00	2,5E-01	NaN	PNP
Uracil Degradation II (Reductive)	1,12E00	2,5E-01	NaN	DPYSL2
Glutathione Redox Reactions II	1,12E00	2,5E-01	NaN	PDIA3
Thymine Degradation	1,12E00	2,5E-01	NaN	DPYSL2
Arginine Degradation I (Arginase Pathway)	1,12E00	2,5E-01	NaN	ARG1
ERK/MAPK Signaling	1,11E00	3,74E-02	NaN	HSPB1,YWHAQ,YWHAG,ITGB1,YWHAZ,YWHAH,YWHAB
Prostate Cancer Signaling	1,1E00	4,88E-02	NaN	HSP90B1,HSP90AB1,GSTP1,HSP90AA1
CXCR4 Signaling	1,09E00	3,95E-02	NaN	MYL6,GNAI2,MYL12A,GNB1,MYL9,GNB2
CCR3 Signaling in Eosinophils	1,09E00	4,27E-02	NaN	GNAI2,CFL1,GNB1,CFL2,GNB2
Gα12/13 Signaling	1,09E00	4,27E-02	NaN	CDH2,MYL6,CDC42,MYL12A,MYL9
Thrombin Signaling	1,07E00	3,66E-02	NaN	MYL6,GNAI2,MYL12A,GNB1,PDIA3,MYL9,GNB2
Gap Junction Signaling	1,06E00	3,87E-02	NaN	GNAI2,TUBA1A,TUBB,PDIA3,ACTA1,TUBA1C
Lipid Antigen Presentation by CD1	1,03E00	7,69E-02	NaN	PDIA3,CANX
Antiproliferative Role of TOB in T Cell Signaling	1,03E00	7,69E-02	NaN	TGFB1,TGFB2
Creatine-phosphate Biosynthesis	1,02E00	2E-01	NaN	CKB
Pentose Phosphate Pathway (Oxidative Branch)	1,02E00	2E-01	NaN	PGLS
Serine Biosynthesis	1,02E00	2E-01	NaN	PSAT1
G Beta Gamma Signaling	1,02E00	4,55E-02	NaN	GNAI2,CDC42,GNB1,GNB2
Colorectal Cancer Metastasis Signaling	1,02E00	3,39E-02	NaN	TGFB1,MMP2,VEGFA,GNB1,TGFB2,VEGFC,MMP1,GNB2
Glutathione-mediated Detoxification	9,54E-01	6,9E-02	NaN	ANPEP,GSTP1
Urea Cycle	9,49E-01	1,67E-01	NaN	ARG1
Arginine Degradation VI (Arginase 2 Pathway)	9,49E-01	1,67E-01	NaN	ARG1
Glycogen Biosynthesis II (from UDP-D-Glucose)	9,49E-01	1,67E-01	NaN	GBE1
Rapoport-Luebering Glycolytic Shunt	9,49E-01	1,67E-01	NaN	PGAM1
GDP-mannose Biosynthesis	9,49E-01	1,67E-01	NaN	GPI
Mitochondrial Dysfunction	9,11E-01	3,51E-02	NaN	VDAC1,PARK7,VDAC2,CYCS,PRDX3,ATP5B
IL-12 Signaling and Production in Macrophages	9,01E-01	3,73E-02	NaN	RAB7A,TGFB1,CLU,TGFB2,ALB
PCP pathway	8,94E-01	4,76E-02	NaN	HSPB1,PFN1,CTHRC1
Relaxin Signaling	8,91E-01	3,7E-02	NaN	GNAI2,VEGFA,GNB1,APEX1,GNB2
Superpathway of Serine and Glycine Biosynthesis I	8,86E-01	1,43E-01	NaN	PSAT1
Glycoaminoglycan-protein Linkage Region Biosynthesis	8,86E-01	1,43E-01	NaN	XYLT1
GDP-glucose Biosynthesis	8,86E-01	1,43E-01	NaN	HK1
Cell Cycle: G1/S Checkpoint Regulation	8,79E-01	4,69E-02	NaN	RPL5,TGFB1,TGFB2
G Protein Signaling Mediated by Tubby	8,62E-01	6,06E-02	NaN	GNB1,GNB2
Dendritic Cell Maturation	8,61E-01	3,39E-02	NaN	COL3A1,COL1A2,PDIA3,COL2A1,COL1A1,FSCN1
PPARα/RXRα Activation	8,44E-01	3,35E-02	NaN	TGFB1,HSP90B1,TGFB2,PDIA3,HSP90AB1,HSP90AA1
Role of NFAT in Cardiac Hypertrophy	8,44E-01	3,35E-02	NaN	GNAI2,TGFB1,GNB1,TGFB2,PDIA3,GNB2
Oncostatin M Signaling	8,41E-01	5,88E-02	NaN	CHI3L1,MMP1
NRF2-mediated Oxidative Stress Response	8,36E-01	3,33E-02	NaN	ERP29,ACTA1,PPIB,VCP,GSTP1,PRDX1
Glucose and Glucose-1-phosphate Degradation	8,32E-01	1,25E-01	NaN	HK1
Citrulline Biosynthesis	8,32E-01	1,25E-01	NaN	ARG1
Purine Ribonucleosides Degradation to Ribose-1-phosphate	8,32E-01	1,25E-01	NaN	PNP
Macropinocytosis Signaling	8,23E-01	4,41E-02	NaN	CDC42,ITGB1,ACTN4
CCR5 Signaling in Macrophages	8,1E-01	4,35E-02	NaN	GNAI2,GNB1,GNB2
Sucrose Degradation V (Mammalian)	7,85E-01	1,11E-01	NaN	TPI1
Corticotropin Releasing Hormone Signaling	7,54E-01	3,6E-02	NaN	ARPC5,GNAI2,KRT1,VEGFA
Docosahexaenoic Acid (DHA) Signaling	7,47E-01	5,13E-02	NaN	SERPINF1,CYCS
Calcium Transport I	7,44E-01	1E-01	NaN	ANXA5
HER-2 Signaling in Breast Cancer	7,24E-01	3,95E-02	NaN	CDC42,MMP2,ITGB1
VEGF Family Ligand-Receptor Interactions	7,24E-01	3,95E-02	NaN	VEGFA,NRP1,VEGFC
IL-6 Signaling	7,08E-01	3,45E-02	NaN	A2M,HSPB1,VEGFA,COL1A1
Tec Kinase Signaling	7,02E-01	3,18E-02	NaN	GNAI2,ITGB1,GNB1,ACTA1,GNB2
P2Y Purigenic Receptor Signaling Pathway	6,82E-01	3,36E-02	NaN	GNAI2,GNB1,PDIA3,GNB2
HMGB1 Signaling	6,73E-01	3,33E-02	NaN	CDC42,TGFB1,TGFB2,SERPINE1
BER pathway	6,73E-01	8,33E-02	NaN	APEX1
Role of IL-17A in Psoriasis	6,42E-01	7,69E-02	NaN	S100A9
Role of Pattern Recognition Receptors in Recognition of Bacteria and Viruses	6,25E-01	3,17E-02	NaN	C3,TGFB1,TGFB2,PTX3
Superpathway of Citrulline Metabolism	6,14E-01	7,14E-02	NaN	ARG1
Colanic Acid Building Blocks Biosynthesis	6,14E-01	7,14E-02	NaN	GPI
α-Adrenergic Signaling	6,1E-01	3,45E-02	NaN	GNAI2,GNB1,GNB2
FAK Signaling	6,1E-01	3,45E-02	NaN	VCL,ITGB1,ACTA1
TNFR1 Signaling	6E-01	4,08E-02	NaN	CDC42,CYCS
Apoptosis Signaling	5,92E-01	3,37E-02	NaN	CYCS,LMNA,SPTAN1
nNOS Signaling in Skeletal Muscle Cells	5,88E-01	6,67E-02	NaN	DAG1
Chondroitin Sulfate Degradation (Metazoa)	5,88E-01	6,67E-02	NaN	CEMIP
γ-glutamyl Cycle	5,88E-01	6,67E-02	NaN	ANPEP
Role of Osteoblasts, Osteoclasts and Chondrocytes in Rheumatoid Arthritis	5,78E-01	2,74E-02	NaN	CTSK,TGFB1,ITGB1,BMP1,COL1A1,MMP1
IL-1 Signaling	5,74E-01	3,3E-02	NaN	GNAI2,GNB1,GNB2
Human Embryonic Stem Cell Pluripotency	5,66E-01	2,99E-02	NaN	INHBA,TGFB1,BMP1,TGFB2
Factors Promoting Cardiogenesis in Vertebrates	5,65E-01	3,26E-02	NaN	TGFB1,BMP1,TGFB2
Granzyme B Signaling	5,64E-01	6,25E-02	NaN	CYCS
Extrinsic Prothrombin Activation Pathway	5,64E-01	6,25E-02	NaN	SERPINC1
Dermatan Sulfate Degradation (Metazoa)	5,64E-01	6,25E-02	NaN	CEMIP
Methylglyoxal Degradation III	5,64E-01	6,25E-02	NaN	AKR1B1
Salvage Pathways of Pyrimidine Ribonucleotides	5,57E-01	3,23E-02	NaN	CMPK1,NME1,AK1
SAPK/JNK Signaling	5,48E-01	3,19E-02	NaN	CDC42,HNRNPK,GNB1
PPAR Signaling	5,48E-01	3,19E-02	NaN	HSP90B1,HSP90AB1,HSP90AA1
RAN Signaling	5,42E-01	5,88E-02	NaN	KPNB1
Methionine Degradation I (to Homocysteine)	5,42E-01	5,88E-02	NaN	AHCY
Regulation of the Epithelial-Mesenchymal Transition Pathway	5,27E-01	2,72E-02	NaN	LOX,CDH2,TGFB1,MMP2,TGFB2
Amyotrophic Lateral Sclerosis Signaling	5,17E-01	3,06E-02	NaN	VEGFA,CYCS,VEGFC
p53 Signaling	5,17E-01	3,06E-02	NaN	SERPINE2,THBS1,TP53I3
Telomerase Signaling	5,09E-01	3,03E-02	NaN	HSP90B1,HSP90AB1,HSP90AA1
Glutathione Redox Reactions I	5,02E-01	5,26E-02	NaN	PRDX6
Cysteine Biosynthesis III (mammalia)	5,02E-01	5,26E-02	NaN	AHCY
Phospholipases	4,99E-01	3,45E-02	NaN	PRDX6,PDIA3
RAR Activation	4,94E-01	2,63E-02	NaN	TGFB1,VEGFA,TGFB2,IGFBP3,MMP1
Antiproliferative Role of Somatostatin Receptor 2	4,52E-01	3,17E-02	NaN	GNB1,GNB2
Maturity Onset Diabetes of Young (MODY) Signaling	4,5E-01	4,55E-02	NaN	GAPDH
Polyamine Regulation in Colon Cancer	4,5E-01	4,55E-02	NaN	PSME1
Tumoricidal Function of Hepatic Natural Killer Cells	4,2E-01	4,17E-02	NaN	CYCS
Triacylglycerol Degradation	4,2E-01	4,17E-02	NaN	PRDX6
Growth Hormone Signaling	4,03E-01	2,9E-02	NaN	A2M,IGFBP3
Melatonin Signaling	3,95E-01	2,86E-02	NaN	GNAI2,PDIA3
NAD Salvage Pathway II	3,94E-01	3,85E-02	NaN	NT5E
p38 MAPK Signaling	3,91E-01	2,56E-02	NaN	HSPB1,TGFB1,TGFB2
Chemokine Signaling	3,88E-01	2,82E-02	NaN	GNAI2,CFL1
GPCR-Mediated Integration of Enteroendocrine Signaling Exemplified by an L Cell	3,88E-01	2,82E-02	NaN	GNAI2,PDIA3
PTEN Signaling	3,85E-01	2,54E-02	NaN	CDC42,ITGB1,YWHAH
IL-15 Production	3,81E-01	3,7E-02	NaN	PTK7
Gαi Signaling	3,75E-01	2,5E-02	NaN	GNAI2,GNB1,GNB2
Sperm Motility	3,69E-01	2,48E-02	NaN	PRDX6,PDIA3,PTK7
CREB Signaling in Neurons	3,61E-01	2,34E-02	NaN	GNAI2,GNB1,PDIA3,GNB2
Role of p14/p19ARF in Tumor Suppression	3,47E-01	3,33E-02	NaN	NPM1
Cyclins and Cell Cycle Regulation	3,41E-01	2,56E-02	NaN	TGFB1,TGFB2
Regulation of IL-2 Expression in Activated and Anergic T Lymphocytes	3,34E-01	2,53E-02	NaN	TGFB1,TGFB2
Ceramide Signaling	3,28E-01	2,5E-02	NaN	CYCS,CTSD
Cytotoxic T Lymphocyte-mediated Apoptosis of Target Cells	3,27E-01	3,12E-02	NaN	CYCS
Superpathway of Methionine Degradation	3,27E-01	3,12E-02	NaN	AHCY
Ovarian Cancer Signaling	3,2E-01	2,29E-02	NaN	MMP2,VEGFA,VEGFC
Cardiac β-adrenergic Signaling	3,11E-01	2,26E-02	NaN	GNB1,APEX1,GNB2
TWEAK Signaling	3,08E-01	2,94E-02	NaN	CYCS
GPCR-Mediated Nutrient Sensing in Enteroendocrine Cells	3,05E-01	2,38E-02	NaN	GNAI2,PDIA3
TR/RXR Activation	3E-01	2,35E-02	NaN	COL6A3,ENO1
IL-17A Signaling in Fibroblasts	2,99E-01	2,86E-02	NaN	MMP1
Thyroid Hormone Metabolism II (via Conjugation and/or Degradation)	2,99E-01	2,86E-02	NaN	EXT2
tRNA Splicing	2,99E-01	2,86E-02	NaN	APEX1
CTLA4 Signaling in Cytotoxic T Lymphocytes	2,84E-01	2,27E-02	NaN	CLTA,CLTC
UVA-Induced MAPK Signaling	2,84E-01	2,27E-02	NaN	PDIA3,CYCS
Crosstalk between Dendritic Cells and Natural Killer Cells	2,79E-01	2,25E-02	NaN	ACTA1,FSCN1
Role of Macrophages, Fibroblasts and Endothelial Cells in Rheumatoid Arthritis	2,76E-01	2,03E-02	NaN	FN1,TGFB1,VEGFA,PDIA3,VEGFC,MMP1
Synaptic Long Term Depression	2,74E-01	2,11E-02	NaN	PRDX6,GNAI2,PDIA3
Role of PKR in Interferon Induction and Antiviral Response	2,6E-01	2,5E-02	NaN	CYCS
Neuroprotective Role of THOP1 in Alzheimer's Disease	2,6E-01	2,5E-02	NaN	YWHAE
Chronic Myeloid Leukemia Signaling	2,6E-01	2,15E-02	NaN	TGFB1,TGFB2
Mechanisms of Viral Exit from Host Cells	2,53E-01	2,44E-02	NaN	ACTA1
CDK5 Signaling	2,34E-01	2,02E-02	NaN	ITGB1,LAMC1
Antioxidant Action of Vitamin C	2,34E-01	2,02E-02	NaN	PRDX6,PDIA3
MSP-RON Signaling Pathway	2,22E-01	2,17E-02	NaN	ACTA1
Hematopoiesis from Pluripotent Stem Cells	2,16E-01	2,13E-02	NaN	IGHA1
Primary Immunodeficiency Signaling	2,11E-01	2,08E-02	NaN	IGHA1

## Sheet: BM MSC DOXO
© 2000-2016 QIAGEN. All rights reserved.
Ingenuity Canonical Pathways	-log(p-value)	Ratio	z-score	Molecules
Remodeling of Epithelial Adherens Junctions	1,13E01	1,91E-01	NaN	IQGAP1,ACTR2,ARPC3,VCL,TUBB3,TUBB,ACTN1,NME1,TUBB4B,RAB7A,TUBA1A,ACTG1,ACTN4
Protein Ubiquitination Pathway	1,04E01	8,24E-02	NaN	PSMB6,HSP90B1,PSMA6,HSPD1,UBE2V1,PSMB5,PSME1,HSPE1,PSMB1,HSPB1,HSPA9,HSPA4,PSMA7,PSMB4,HSPA8,HSPA5,PSMB2,HSP90AB1,PSMA1,HSP90AA1,PSMA5
Glycolysis I	9,09E00	3,2E-01	NaN	TPI1,PGAM1,ENO2,PGK1,PKM,GAPDH,ALDOA,ENO1
Gluconeogenesis I	9,09E00	3,2E-01	NaN	PGAM1,ENO2,PGK1,GAPDH,ALDOA,MDH2,ENO1,MDH1
Hepatic Fibrosis / Hepatic Stellate Cell Activation	8,46E00	8,74E-02	NaN	MMP2,COL6A3,COL6A1,COL3A1,COL1A2,COL1A1,COL6A2,TIMP2,MYH9,A2M,COL12A1,FN1,COL2A1,IGFBP3,SERPINE1,MMP1
Actin Cytoskeleton Signaling	7,4E00	7,37E-02	NaN	IQGAP1,ACTR2,TLN1,ARPC3,VCL,EZR,MSN,ACTN1,RDX,MYH9,FN1,CFL1,PFN1,ACTG1,GSN,ACTN4
Pentose Phosphate Pathway	6,75E00	4,55E-01	NaN	TKT,PGD,G6PD,PGLS,TALDO1
14-3-3-mediated Signaling	6,31E00	9,4E-02	NaN	VIM,YWHAQ,TUBA1A,YWHAG,TUBB3,TUBB,PDIA3,YWHAE,YWHAZ,YWHAB,TUBB4B
Unfolded protein response	6,25E00	1,48E-01	NaN	HSPA4,HSPA9,HSPA8,HSP90B1,HSPA5,CANX,VCP,P4HB
Epithelial Adherens Junction Signaling	6,19E00	8,22E-02	NaN	IQGAP1,TUBA1A,ACTR2,ARPC3,VCL,ACTG1,TUBB3,TUBB,ACTN1,ACTN4,TUBB4B,MYH9
Inhibition of Matrix Metalloproteases	6,12E00	1,79E-01	NaN	A2M,MMP3,MMP2,THBS2,MMP1,TIMP2,MMP14
Germ Cell-Sertoli Cell Junction Signaling	5,77E00	7,5E-02	NaN	A2M,IQGAP1,TUBA1A,CFL1,VCL,ACTG1,TUBB3,TUBB,GSN,ACTN1,ACTN4,TUBB4B
Intrinsic Prothrombin Activation Pathway	5,7E00	2,07E-01	NaN	COL3A1,COL1A2,COL2A1,COL1A1,F5,SERPINC1
Aldosterone Signaling in Epithelial Cells	5,19E00	7,24E-02	NaN	HSPB1,HSPA4,HSPA9,HSPA8,HSP90B1,HSPA5,HSPD1,PDIA3,HSP90AB1,HSP90AA1,HSPE1
Leukocyte Extravasation Signaling	4,82E00	6,06E-02	NaN	MMP3,MMP2,VCL,ACTG1,EZR,MSN,ACTN1,ACTN4,MMP1,RDX,TIMP2,MMP14
Pentose Phosphate Pathway (Oxidative Branch)	4,64E00	6E-01	NaN	PGD,G6PD,PGLS
Sertoli Cell-Sertoli Cell Junction Signaling	4,54E00	6,18E-02	NaN	SPTBN1,A2M,TUBA1A,VCL,ACTG1,TUBB3,TUBB,ACTN1,ACTN4,TUBB4B,SPTAN1
NRF2-mediated Oxidative Stress Response	4,5E00	6,11E-02	NaN	GSTO1,ACTG1,TXN,ERP29,AKR1A1,PPIB,VCP,GSTP1,PRDX1,HMOX1,STIP1
phagosome maturation	4,47E00	7,5E-02	NaN	PRDX6,TUBA1A,RAB7A,TUBB3,TUBB,CANX,PRDX2,PRDX1,TUBB4B
ILK Signaling	4,37E00	5,91E-02	NaN	FLNB,VIM,FN1,CFL1,VCL,ACTG1,FLNC,ACTN1,ACTN4,MYH9,NACA
Atherosclerosis Signaling	4,35E00	7,26E-02	NaN	PRDX6,MMP3,CLU,COL3A1,COL1A2,COL2A1,COL1A1,MMP1,ALB
IGF-1 Signaling	4,32E00	8,25E-02	NaN	YWHAQ,YWHAG,IGFBP7,IGFBP3,YWHAE,YWHAZ,YWHAB,IGFBP6
HIF1α Signaling	4,17E00	7,84E-02	NaN	MMP3,MMP2,LDHA,HSP90AA1,APEX1,MMP1,MMP14,LDHB
Aspartate Degradation II	4,1E00	4,29E-01	NaN	GOT2,MDH2,MDH1
Acute Phase Response Signaling	4,02E00	5,92E-02	NaN	A2M,C4A/C4B,FN1,C3,SERPINF1,ITIH3,SERPINE1,AHSG,HMOX1,ALB
Myc Mediated Apoptosis Signaling	3,91E00	1,03E-01	NaN	YWHAQ,YWHAG,CYCS,YWHAE,YWHAZ,YWHAB
TCA Cycle II (Eukaryotic)	3,65E00	1,74E-01	NaN	DLD,FH,MDH2,MDH1
Hypoxia Signaling in the Cardiovascular System	3,64E00	9,23E-02	NaN	HSP90B1,UBE2V1,LDHA,HSP90AB1,HSP90AA1,P4HB
RhoA Signaling	3,62E00	6,56E-02	NaN	ACTR2,CFL1,PFN1,ARPC3,ACTG1,EZR,MSN,RDX
Agranulocyte Adhesion and Diapedesis	3,62E00	5,29E-02	NaN	MMP3,FN1,MMP2,ACTG1,EZR,MSN,MMP1,RDX,MYH9,MMP14
PI3K/AKT Signaling	3,6E00	6,5E-02	NaN	YWHAQ,YWHAG,HSP90B1,HSP90AB1,YWHAE,YWHAZ,HSP90AA1,YWHAB
Cell Cycle: G2/M DNA Damage Checkpoint Regulation	3,31E00	1,02E-01	NaN	YWHAQ,YWHAG,YWHAE,YWHAZ,YWHAB
RhoGDI Signaling	3,26E00	5,2E-02	NaN	GDI1,ACTR2,CFL1,ARPC3,ACTG1,EZR,MSN,GDI2,RDX
eNOS Signaling	3,18E00	5,63E-02	NaN	HSPA4,HSPA9,CALM1 (includes others),HSPA8,HSP90B1,HSPA5,HSP90AB1,HSP90AA1
Regulation of Cellular Mechanics by Calpain Protease	3,01E00	8,77E-02	NaN	TLN1,VCL,EZR,ACTN1,ACTN4
Arsenate Detoxification I (Glutaredoxin)	2,98E00	5E-01	NaN	GSTO1,PNP
p70S6K Signaling	2,96E00	5,88E-02	NaN	YWHAQ,YWHAG,PDIA3,YWHAE,YWHAZ,EEF2,YWHAB
Granzyme B Signaling	2,93E00	1,88E-01	NaN	LMNB1,CYCS,LMNB2
Coagulation System	2,93E00	1,14E-01	NaN	A2M,SERPINE1,F5,SERPINC1
Glucocorticoid Receptor Signaling	2,91E00	4E-02	NaN	A2M,HSPA4,HSPA9,HSPA8,HSP90B1,HSPA5,SERPINE1,HSP90AB1,HSP90AA1,MMP1,ANXA1
Antigen Presentation Pathway	2,84E00	1,08E-01	NaN	PSMB6,PDIA3,CANX,PSMB5
ERK5 Signaling	2,81E00	7,94E-02	NaN	YWHAQ,YWHAG,YWHAE,YWHAZ,YWHAB
Fcγ Receptor-mediated Phagocytosis in Macrophages and Monocytes	2,81E00	6,45E-02	NaN	ACTR2,ARPC3,TLN1,ACTG1,EZR,HMOX1
Mitochondrial Dysfunction	2,66E00	4,68E-02	NaN	VDAC1,PARK7,VDAC2,ATP5A1,CYCS,MT-CO2,PRDX3,ATP5B
Pyruvate Fermentation to Lactate	2,59E00	3,33E-01	NaN	LDHA,LDHB
Pentose Phosphate Pathway (Non-oxidative Branch)	2,59E00	3,33E-01	NaN	TKT,TALDO1
Granulocyte Adhesion and Diapedesis	2,57E00	4,52E-02	NaN	HSPB1,MMP3,MMP2,EZR,MSN,MMP1,RDX,MMP14
Aryl Hydrocarbon Receptor Signaling	2,55E00	5E-02	NaN	HSPB1,GSTO1,HSP90B1,HSP90AB1,GSTP1,CTSD,HSP90AA1
Clathrin-mediated Endocytosis Signaling	2,45E00	4,32E-02	NaN	RAB7A,ACTR2,ARPC3,ACTG1,HSPA8,CLU,CLTC,ALB
Huntington's Disease Signaling	2,42E00	3,93E-02	NaN	HSPA4,HSPA9,HSPA8,CLTC,HSPA5,PSME1,CYCS,CTSD,ATP5B
Signaling by Rho Family GTPases	2,36E00	3,85E-02	NaN	VIM,IQGAP1,ACTR2,CFL1,ARPC3,ACTG1,EZR,MSN,RDX
Airway Pathology in Chronic Obstructive Pulmonary Disease	2,33E00	2,5E-01	NaN	MMP2,MMP1
Semaphorin Signaling in Neurons	2,26E00	7,55E-02	NaN	CFL1,DPYSL3,SEMA7A,DPYSL2
LXR/RXR Activation	2,24E00	4,96E-02	NaN	C4A/C4B,C3,SERPINF1,CLU,AHSG,ALB
Integrin Signaling	2,24E00	3,98E-02	NaN	ACTR2,ARPC3,TLN1,VCL,ACTG1,ARF4,ACTN1,ACTN4
HIPPO signaling	2,23E00	5,81E-02	NaN	YWHAQ,YWHAG,YWHAE,YWHAZ,YWHAB
Sucrose Degradation V (Mammalian)	2,22E00	2,22E-01	NaN	TPI1,ALDOA
Bladder Cancer Signaling	2,21E00	5,75E-02	NaN	MMP3,MMP2,THBS1,MMP1,MMP14
Glutathione-mediated Detoxification	2,18E00	1,03E-01	NaN	GSTO1,ANPEP,GSTP1
FXR/RXR Activation	2,14E00	4,72E-02	NaN	C4A/C4B,C3,SERPINF1,CLU,AHSG,ALB
Regulation of Actin-based Motility by Rho	2,12E00	5,49E-02	NaN	ACTR2,CFL1,PFN1,ARPC3,GSN
Death Receptor Signaling	2,1E00	5,43E-02	NaN	HSPB1,ACTG1,CYCS,LMNA,SPTAN1
VEGF Signaling	2,1E00	5,43E-02	NaN	VCL,ACTG1,ACTN1,ACTN4,YWHAE
Superpathway of Methionine Degradation	2,06E00	9,38E-02	NaN	DLD,GOT2,MAT2A
Oncostatin M Signaling	1,98E00	8,82E-02	NaN	MMP3,CHI3L1,MMP1
Antioxidant Action of Vitamin C	1,97E00	5,05E-02	NaN	PRDX6,GSTO1,TXN,PDIA3,HMOX1
Paxillin Signaling	1,94E00	4,95E-02	NaN	TLN1,VCL,ACTG1,ACTN1,ACTN4
Guanosine Nucleotides Degradation III	1,9E00	1,54E-01	NaN	PNP,NT5E
Xanthine and Xanthosine Salvage	1,87E00	1E00	NaN	PNP
Axonal Guidance Signaling	1,85E00	2,76E-02	NaN	TUBA1A,ACTR2,CFL1,PFN1,ARPC3,MMP2,TUBB3,TUBB,SEMA7A,PDIA3,DPYSL2,TUBB4B
Urate Biosynthesis/Inosine 5'-phosphate Degradation	1,84E00	1,43E-01	NaN	PNP,NT5E
Caveolar-mediated Endocytosis Signaling	1,82E00	5,63E-02	NaN	FLNB,ACTG1,FLNC,ALB
tRNA Charging	1,82E00	7,69E-02	NaN	GARS,HARS,KARS
Telomere Extension by Telomerase	1,78E00	1,33E-01	NaN	HNRNPA1,HNRNPA2B1
γ-glutamyl Cycle	1,78E00	1,33E-01	NaN	ANPEP,GSS
Vitamin-C Transport	1,78E00	1,33E-01	NaN	GSTO1,TXN
Mechanisms of Viral Exit from Host Cells	1,76E00	7,32E-02	NaN	ACTG1,LMNB1,LMNB2
Gap Junction Signaling	1,74E00	3,87E-02	NaN	TUBA1A,ACTG1,TUBB3,TUBB,PDIA3,TUBB4B
Extrinsic Prothrombin Activation Pathway	1,72E00	1,25E-01	NaN	F5,SERPINC1
Methylglyoxal Degradation III	1,72E00	1,25E-01	NaN	AKR1B1,AKR1A1
Parkinson's Signaling	1,72E00	1,25E-01	NaN	PARK7,CYCS
RAN Signaling	1,67E00	1,18E-01	NaN	RAN,KPNB1
Adenosine Nucleotides Degradation II	1,67E00	1,18E-01	NaN	PNP,NT5E
Prostate Cancer Signaling	1,62E00	4,88E-02	NaN	HSP90B1,HSP90AB1,GSTP1,HSP90AA1
UDP-D-xylose and UDP-D-glucuronate Biosynthesis	1,58E00	5E-01	NaN	UGDH
Guanine and Guanosine Salvage I	1,58E00	5E-01	NaN	PNP
Adenine and Adenosine Salvage I	1,58E00	5E-01	NaN	PNP
Glutamate Biosynthesis II	1,58E00	5E-01	NaN	GLUD1
Glutamate Degradation X	1,58E00	5E-01	NaN	GLUD1
Granzyme A Signaling	1,54E00	1E-01	NaN	NME1,APEX1
Purine Nucleotides Degradation II (Aerobic)	1,54E00	1E-01	NaN	PNP,NT5E
Virus Entry via Endocytic Pathways	1,5E00	4,49E-02	NaN	FLNB,ACTG1,CLTC,FLNC
Endoplasmic Reticulum Stress Pathway	1,5E00	9,52E-02	NaN	HSP90B1,HSPA5
Dendritic Cell Maturation	1,5E00	3,39E-02	NaN	COL3A1,COL1A2,PDIA3,COL2A1,COL1A1,FSCN1
Protein Kinase A Signaling	1,45E00	2,59E-02	NaN	FLNB,YWHAQ,CALM1 (includes others),YWHAG,FLNC,PDIA3,YWHAE,YWHAZ,APEX1,YWHAB
Diphthamide Biosynthesis	1,4E00	3,33E-01	NaN	EEF2
NADH Repair	1,4E00	3,33E-01	NaN	GAPDH
Methylglyoxal Degradation I	1,4E00	3,33E-01	NaN	GLO1
Glutathione Biosynthesis	1,4E00	3,33E-01	NaN	GSS
D-glucuronate Degradation I	1,4E00	3,33E-01	NaN	AKR1A1
Thyroid Hormone Biosynthesis	1,4E00	3,33E-01	NaN	CTSD
Glutamate Degradation II	1,4E00	3,33E-01	NaN	GOT2
S-adenosyl-L-methionine Biosynthesis	1,4E00	3,33E-01	NaN	MAT2A
Aspartate Biosynthesis	1,4E00	3,33E-01	NaN	GOT2
ERK/MAPK Signaling	1,4E00	3,21E-02	NaN	HSPB1,YWHAQ,YWHAG,TLN1,YWHAZ,YWHAB
Phospholipases	1,37E00	5,17E-02	NaN	PRDX6,PDIA3,HMOX1
Nitric Oxide Signaling in the Cardiovascular System	1,34E00	4E-02	NaN	CALM1 (includes others),HSP90B1,HSP90AB1,HSP90AA1
Lipid Antigen Presentation by CD1	1,33E00	7,69E-02	NaN	PDIA3,CANX
Rac Signaling	1,29E00	3,85E-02	NaN	IQGAP1,ACTR2,CFL1,ARPC3
PCP pathway	1,28E00	4,76E-02	NaN	HSPB1,PFN1,CTHRC1
Uracil Degradation II (Reductive)	1,28E00	2,5E-01	NaN	DPYSL2
2-ketoglutarate Dehydrogenase Complex	1,28E00	2,5E-01	NaN	DLD
Heme Degradation	1,28E00	2,5E-01	NaN	HMOX1
Branched-chain α-keto acid Dehydrogenase Complex	1,28E00	2,5E-01	NaN	DLD
Ascorbate Recycling (Cytosolic)	1,28E00	2,5E-01	NaN	GSTO1
Glutathione Redox Reactions II	1,28E00	2,5E-01	NaN	PDIA3
Thymine Degradation	1,28E00	2,5E-01	NaN	DPYSL2
L-cysteine Degradation I	1,28E00	2,5E-01	NaN	GOT2
Mitotic Roles of Polo-Like Kinase	1,23E00	4,55E-02	NaN	HSP90B1,HSP90AB1,HSP90AA1
Oxidative Phosphorylation	1,23E00	3,67E-02	NaN	ATP5A1,CYCS,MT-CO2,ATP5B
phagosome formation	1,23E00	3,67E-02	NaN	FN1,MRC2,PDIA3,MARCKS
Agrin Interactions at Neuromuscular Junction	1,19E00	4,35E-02	NaN	ACTG1,LAMB1,LAMC1
Serine Biosynthesis	1,19E00	2E-01	NaN	PSAT1
2-oxobutanoate Degradation I	1,19E00	2E-01	NaN	DLD
Role of Osteoblasts, Osteoclasts and Chondrocytes in Rheumatoid Arthritis	1,13E00	2,74E-02	NaN	MMP3,CALM1 (includes others),GSN,COL1A1,MMP1,MMP14
Arginine Biosynthesis IV	1,11E00	1,67E-01	NaN	GLUD1
Thioredoxin Pathway	1,11E00	1,67E-01	NaN	TXN
Glycine Cleavage Complex	1,11E00	1,67E-01	NaN	DLD
UDP-N-acetyl-D-glucosamine Biosynthesis II	1,11E00	1,67E-01	NaN	PGM3
Rapoport-Luebering Glycolytic Shunt	1,11E00	1,67E-01	NaN	PGAM1
VDR/RXR Activation	1,06E00	3,85E-02	NaN	SERPINB1,IGFBP3,IGFBP6
Complement System	1,06E00	5,41E-02	NaN	C4A/C4B,C3
Superpathway of Serine and Glycine Biosynthesis I	1,05E00	1,43E-01	NaN	PSAT1
Acetyl-CoA Biosynthesis I (Pyruvate Dehydrogenase Complex)	1,05E00	1,43E-01	NaN	DLD
Adenine and Adenosine Salvage III	1,05E00	1,43E-01	NaN	PNP
GDP-glucose Biosynthesis	1,05E00	1,43E-01	NaN	PGM3
PPARα/RXRα Activation	1,03E00	2,79E-02	NaN	HSP90B1,GOT2,PDIA3,HSP90AB1,HSP90AA1
Cellular Effects of Sildenafil (Viagra)	1,02E00	3,1E-02	NaN	CALM1 (includes others),ACTG1,PDIA3,MYH9
Docosahexaenoic Acid (DHA) Signaling	1,02E00	5,13E-02	NaN	SERPINF1,CYCS
Glucose and Glucose-1-phosphate Degradation	9,91E-01	1,25E-01	NaN	PGM3
Purine Ribonucleosides Degradation to Ribose-1-phosphate	9,91E-01	1,25E-01	NaN	PNP
FAK Signaling	9,55E-01	3,45E-02	NaN	TLN1,VCL,ACTG1
Breast Cancer Regulation by Stathmin1	9,45E-01	2,62E-02	NaN	TUBA1A,CALM1 (includes others),TUBB3,TUBB,TUBB4B
Neuregulin Signaling	9,44E-01	3,41E-02	NaN	HSP90B1,HSP90AB1,HSP90AA1
UDP-N-acetyl-D-galactosamine Biosynthesis II	9,43E-01	1,11E-01	NaN	PGM3
Crosstalk between Dendritic Cells and Natural Killer Cells	9,33E-01	3,37E-02	NaN	TLN1,ACTG1,FSCN1
Apoptosis Signaling	9,33E-01	3,37E-02	NaN	CYCS,LMNA,SPTAN1
Calcium Transport I	9E-01	1E-01	NaN	ANXA5
Glycogen Degradation II	9E-01	1E-01	NaN	PGM3
PPAR Signaling	8,81E-01	3,19E-02	NaN	HSP90B1,HSP90AB1,HSP90AA1
p53 Signaling	8,43E-01	3,06E-02	NaN	SERPINE2,THBS1,TP53I3
Telomerase Signaling	8,33E-01	3,03E-02	NaN	HSP90B1,HSP90AB1,HSP90AA1
Glycogen Degradation III	8,26E-01	8,33E-02	NaN	PGM3
BER pathway	8,26E-01	8,33E-02	NaN	APEX1
Xenobiotic Metabolism Signaling	8,06E-01	2,21E-02	NaN	GSTO1,HSP90B1,HSP90AB1,GSTP1,HSP90AA1,HMOX1
Choline Biosynthesis III	7,95E-01	7,69E-02	NaN	HMOX1
Isoleucine Degradation I	7,65E-01	7,14E-02	NaN	DLD
Phenylalanine Degradation IV (Mammalian, via Side Chain)	7,65E-01	7,14E-02	NaN	GOT2
Colanic Acid Building Blocks Biosynthesis	7,65E-01	7,14E-02	NaN	UGDH
Actin Nucleation by ARP-WASP Complex	7,64E-01	3,57E-02	NaN	ACTR2,ARPC3
fMLP Signaling in Neutrophils	7,55E-01	2,78E-02	NaN	ACTR2,CALM1 (includes others),ARPC3
Glioma Invasiveness Signaling	7,53E-01	3,51E-02	NaN	MMP2,TIMP2
Nur77 Signaling in T Lymphocytes	7,53E-01	3,51E-02	NaN	CALM1 (includes others),CYCS
Role of Tissue Factor in Cancer	7,39E-01	2,73E-02	NaN	CFL1,MMP1,P4HB
nNOS Signaling in Skeletal Muscle Cells	7,38E-01	6,67E-02	NaN	CALM1 (includes others)
Chondroitin Sulfate Degradation (Metazoa)	7,38E-01	6,67E-02	NaN	HEXB
Tight Junction Signaling	7,32E-01	2,4E-02	NaN	VCL,ACTG1,MYH9,SPTAN1
Cdc42 Signaling	7,32E-01	2,4E-02	NaN	IQGAP1,ACTR2,CFL1,ARPC3
Androgen Signaling	7,31E-01	2,7E-02	NaN	HSPA4,CALM1 (includes others),HSP90AA1
Dermatan Sulfate Degradation (Metazoa)	7,13E-01	6,25E-02	NaN	HEXB
IL-6 Signaling	6,93E-01	2,59E-02	NaN	A2M,HSPB1,COL1A1
Methionine Degradation I (to Homocysteine)	6,89E-01	5,88E-02	NaN	MAT2A
CD28 Signaling in T Helper Cells	6,79E-01	2,54E-02	NaN	ACTR2,CALM1 (includes others),ARPC3
Valine Degradation I	6,67E-01	5,56E-02	NaN	DLD
Sperm Motility	6,58E-01	2,48E-02	NaN	PRDX6,CALM1 (includes others),PDIA3
Glutathione Redox Reactions I	6,47E-01	5,26E-02	NaN	PRDX6
Cysteine Biosynthesis III (mammalia)	6,47E-01	5,26E-02	NaN	MAT2A
IL-8 Signaling	6,34E-01	2,17E-02	NaN	IQGAP1,MMP2,LASP1,HMOX1
Growth Hormone Signaling	6,28E-01	2,9E-02	NaN	A2M,IGFBP3
Melatonin Signaling	6,19E-01	2,86E-02	NaN	CALM1 (includes others),PDIA3
PI3K Signaling in B Lymphocytes	6,11E-01	2,34E-02	NaN	CALM1 (includes others),C3,PDIA3
Chemokine Signaling	6,1E-01	2,82E-02	NaN	CFL1,CALM1 (includes others)
Maturity Onset Diabetes of Young (MODY) Signaling	5,91E-01	4,55E-02	NaN	GAPDH
Polyamine Regulation in Colon Cancer	5,91E-01	4,55E-02	NaN	PSME1
Pyrimidine Deoxyribonucleotides De Novo Biosynthesis I	5,91E-01	4,55E-02	NaN	NME1
Tryptophan Degradation X (Mammalian, via Tryptamine)	5,91E-01	4,55E-02	NaN	AKR1A1
IL-12 Signaling and Production in Macrophages	5,75E-01	2,24E-02	NaN	RAB7A,CLU,ALB
Tumoricidal Function of Hepatic Natural Killer Cells	5,59E-01	4,17E-02	NaN	CYCS
Triacylglycerol Degradation	5,59E-01	4,17E-02	NaN	PRDX6
Ceramide Signaling	5,38E-01	2,5E-02	NaN	CYCS,CTSD
NAD Salvage Pathway II	5,3E-01	3,85E-02	NaN	NT5E
TR/RXR Activation	5,02E-01	2,35E-02	NaN	COL6A3,ENO1
Pyrimidine Ribonucleotides Interconversion	4,91E-01	3,45E-02	NaN	NME1
TGF-β Signaling	4,89E-01	2,3E-02	NaN	INHBA,SERPINE1
RANK Signaling in Osteoclasts	4,83E-01	2,27E-02	NaN	CALM1 (includes others),GSN
UVA-Induced MAPK Signaling	4,83E-01	2,27E-02	NaN	PDIA3,CYCS
Role of p14/p19ARF in Tumor Suppression	4,79E-01	3,33E-02	NaN	NPM1
Pyrimidine Ribonucleotides De Novo Biosynthesis	4,67E-01	3,23E-02	NaN	NME1
Cytotoxic T Lymphocyte-mediated Apoptosis of Target Cells	4,56E-01	3,12E-02	NaN	CYCS
Role of Macrophages, Fibroblasts and Endothelial Cells in Rheumatoid Arthritis	4,41E-01	1,69E-02	NaN	MMP3,FN1,CALM1 (includes others),PDIA3,MMP1
TWEAK Signaling	4,35E-01	2,94E-02	NaN	CYCS
Inhibition of Angiogenesis by TSP1	4,35E-01	2,94E-02	NaN	THBS1
IL-17A Signaling in Fibroblasts	4,25E-01	2,86E-02	NaN	MMP1
tRNA Splicing	4,25E-01	2,86E-02	NaN	APEX1
Ethanol Degradation II	4,25E-01	2,86E-02	NaN	AKR1A1
CDK5 Signaling	4,18E-01	2,02E-02	NaN	LAMB1,LAMC1
Colorectal Cancer Metastasis Signaling	4,12E-01	1,69E-02	NaN	MMP3,MMP2,MMP1,MMP14
Phospholipase C Signaling	4,08E-01	1,69E-02	NaN	PEBP1,CALM1 (includes others),HMOX1,MARCKS
Noradrenaline and Adrenaline Degradation	3,97E-01	2,63E-02	NaN	AKR1A1
Endothelin-1 Signaling	3,93E-01	1,74E-02	NaN	PRDX6,PDIA3,HMOX1
Ephrin Receptor Signaling	3,86E-01	1,72E-02	NaN	ACTR2,CFL1,ARPC3
Role of PKR in Interferon Induction and Antiviral Response	3,8E-01	2,5E-02	NaN	CYCS
Neuroprotective Role of THOP1 in Alzheimer's Disease	3,8E-01	2,5E-02	NaN	YWHAE
Calcium Signaling	3,71E-01	1,69E-02	NaN	CALM1 (includes others),TPM4,MYH9
AMPK Signaling	3,67E-01	1,68E-02	NaN	AK3,CAB39,EEF2
Type I Diabetes Mellitus Signaling	3,63E-01	1,82E-02	NaN	HSPD1,CYCS
Corticotropin Releasing Hormone Signaling	3,58E-01	1,8E-02	NaN	CALM1 (includes others),KRT1
iNOS Signaling	3,5E-01	2,27E-02	NaN	CALM1 (includes others)
mTOR Signaling	3,37E-01	1,6E-02	NaN	FKBP1A,EIF4A1,HMOX1
MSP-RON Signaling Pathway	3,36E-01	2,17E-02	NaN	ACTG1
CCR3 Signaling in Eosinophils	3,33E-01	1,71E-02	NaN	CFL1,CALM1 (includes others)
nNOS Signaling in Neurons	3,29E-01	2,13E-02	NaN	CALM1 (includes others)
Synaptic Long Term Potentiation	3,24E-01	1,68E-02	NaN	CALM1 (includes others),PDIA3
Ephrin A Signaling	3,22E-01	2,08E-02	NaN	CFL1
TNFR1 Signaling	3,16E-01	2,04E-02	NaN	CYCS
Heparan Sulfate Biosynthesis (Late Stages)	3,1E-01	2E-02	NaN	PRDX6
CD27 Signaling in Lymphocytes	2,98E-01	1,92E-02	NaN	CYCS
Role of Pattern Recognition Receptors in Recognition of Bacteria and Viruses	2,98E-01	1,59E-02	NaN	C3,PTX3
Lymphotoxin β Receptor Signaling	2,87E-01	1,85E-02	NaN	CYCS
Role of IL-17A in Arthritis	2,87E-01	1,85E-02	NaN	MMP1
Wnt/Ca+ pathway	2,76E-01	1,79E-02	NaN	PDIA3
Heparan Sulfate Biosynthesis	2,71E-01	1,75E-02	NaN	PRDX6
Glutamate Receptor Signaling	2,71E-01	1,75E-02	NaN	CALM1 (includes others)
Induction of Apoptosis by HIV1	2,56E-01	1,67E-02	NaN	CYCS
Retinoic acid Mediated Apoptosis Signaling	2,47E-01	1,61E-02	NaN	CYCS
Synaptic Long Term Depression	2,46E-01	1,41E-02	NaN	PRDX6,PDIA3
Activation of IRF by Cytosolic Pattern Recognition Receptors	2,43E-01	1,59E-02	NaN	PPIB
Cardiac Hypertrophy Signaling	2,4E-01	1,35E-02	NaN	HSPB1,CALM1 (includes others),PDIA3
Calcium-induced T Lymphocyte Apoptosis	2,38E-01	1,56E-02	NaN	CALM1 (includes others)
Eicosanoid Signaling	2,38E-01	1,56E-02	NaN	PRDX6
Gαq Signaling	2,31E-01	1,36E-02	NaN	CALM1 (includes others),HMOX1
Serotonin Degradation	2,26E-01	1,49E-02	NaN	AKR1A1
IL-10 Signaling	2,22E-01	1,47E-02	NaN	HMOX1
Macropinocytosis Signaling	2,22E-01	1,47E-02	NaN	ACTN4
CCR5 Signaling in Macrophages	2,18E-01	1,45E-02	NaN	CALM1 (includes others)
Role of MAPK Signaling in the Pathogenesis of Influenza	2,18E-01	1,45E-02	NaN	PRDX6
Renal Cell Carcinoma Signaling	2,11E-01	1,41E-02	NaN	FH
Small Cell Lung Cancer Signaling	2,11E-01	1,41E-02	NaN	CYCS
PEDF Signaling	2,11E-01	1,41E-02	NaN	SERPINF1
GPCR-Mediated Integration of Enteroendocrine Signaling Exemplified by an L Cell	2,11E-01	1,41E-02	NaN	PDIA3
IL-17 Signaling	2,07E-01	1,39E-02	NaN	MMP3
Ephrin B Signaling	2,03E-01	1,37E-02	NaN	CFL1
Leptin Signaling in Obesity	2E-01	1,35E-02	NaN	PDIA3

## Sheet: BM MSC H2O2
© 2000-2016 QIAGEN. All rights reserved.
Ingenuity Canonical Pathways	-log(p-value)	Ratio	z-score	Molecules
Remodeling of Epithelial Adherens Junctions	1,6E01	2,5E-01	NaN	IQGAP1,ACTR2,ARPC3,VCL,TUBB3,TUBB,ACTN1,TUBA1C,NME1,ARPC1B,ACTR3,TUBB4B,RAB5C,ARPC5,RAB7A,ACTG1,ACTN4
Actin Cytoskeleton Signaling	1,01E01	9,22E-02	NaN	IQGAP1,ACTR2,TLN1,ARPC3,VCL,ITGA2,MSN,ACTN1,ARPC1B,ACTR3,RDX,MYH9,ARPC5,FN1,CFL1,PFN1,ACTG1,ITGB1,PPP1CB,ACTN4
Hepatic Fibrosis / Hepatic Stellate Cell Activation	9,62E00	9,84E-02	NaN	MMP2,COL6A3,COL6A1,COL3A1,COL1A2,COL1A1,COL6A2,COL5A1,TIMP2,MYH9,A2M,COL12A1,COL5A2,FN1,STAT1,COL4A2,IGFBP3,SERPINE1
Epithelial Adherens Junction Signaling	9,31E00	1,1E-01	NaN	IQGAP1,ACTR2,ARPC3,VCL,TUBB3,TUBB,ACTN1,TUBA1C,ARPC1B,ACTR3,TUBB4B,MYH9,ARPC5,ACTG1,RAP1B,ACTN4
Protein Ubiquitination Pathway	8,09E00	7,45E-02	NaN	PSMB6,UBA1,HSP90B1,HSPD1,UBE2V1,PSMB5,HSPE1,PSMB1,HSPB1,HSPA9,HSPA4,PSMB4,HSPA8,HSPA5,HSP90AB1,PSMD2,PSMA1,HSP90AA1,PSMA5
Glycolysis I	7,28E00	2,8E-01	NaN	TPI1,PGAM1,PGK1,PKM,GAPDH,ALDOA,ENO1
Regulation of Actin-based Motility by Rho	7,02E00	1,21E-01	NaN	ARPC5,ACTR2,CFL1,PFN1,ARPC3,ITGB1,ITGA2,ARHGDIA,PPP1CB,ACTR3,ARPC1B
Clathrin-mediated Endocytosis Signaling	6,98E00	8,11E-02	NaN	ACTR2,ARPC3,CLTC,ARPC1B,ACTR3,RAB5C,ARPC5,RAB7A,ACTG1,HSPA8,CLU,ITGB1,AP2A1,RAB11B,ALB
RhoA Signaling	6,61E00	9,84E-02	NaN	ARPC5,ACTR2,CFL1,PFN1,ARPC3,ACTG1,SEPT11,MSN,PPP1CB,ACTR3,ARPC1B,RDX
RhoGDI Signaling	6,55E00	8,09E-02	NaN	ACTR2,ARPC3,ITGA2,MSN,GDI2,ACTR3,ARPC1B,RDX,ARPC5,GNAI2,CFL1,ACTG1,ITGB1,ARHGDIA
Integrin Signaling	6,52E00	7,46E-02	NaN	ACTR2,TLN1,ARPC3,VCL,ITGA2,ACTN1,ARPC1B,ACTR3,ARPC5,ACTG1,ITGB1,RAP1B,PPP1CB,ACTN4,CAPNS1
Germ Cell-Sertoli Cell Junction Signaling	6,14E00	8,13E-02	NaN	IQGAP1,VCL,TUBB3,TUBB,ITGA2,ACTN1,TUBA1C,TUBB4B,A2M,CFL1,ACTG1,ITGB1,ACTN4
Unfolded protein response	5,94E00	1,48E-01	NaN	HSPA4,HSPA9,HSPA8,HSP90B1,HSPA5,CANX,VCP,P4HB
Gluconeogenesis I	5,88E00	2,4E-01	NaN	PGAM1,PGK1,GAPDH,ALDOA,ENO1,MDH1
Inhibition of Matrix Metalloproteases	5,85E00	1,79E-01	NaN	A2M,MMP2,THBS2,HSPG2,LRP1,TIMP2,MMP14
phagosome maturation	5,8E00	9,17E-02	NaN	PRDX6,RAB5C,RAB7A,PRDX5,TUBB3,TUBB,CANX,PRDX2,TUBA1C,PRDX1,TUBB4B
Signaling by Rho Family GTPases	5,68E00	6,41E-02	NaN	IQGAP1,ACTR2,ARPC3,ITGA2,MSN,ACTR3,ARPC1B,RDX,VIM,ARPC5,GNAI2,CFL1,ACTG1,SEPT11,ITGB1
Aldosterone Signaling in Epithelial Cells	5,58E00	7,89E-02	NaN	HSPB1,HSPA4,HSPA9,HSPA8,HSP90B1,HSPA5,HSPD1,PDIA3,HSP90AB1,HSP90AA1,HSPE1,AHCY
Leukocyte Extravasation Signaling	5,11E00	6,57E-02	NaN	MMP2,VCL,ITGA2,MSN,ACTN1,RDX,TIMP2,GNAI2,ACTG1,ITGB1,RAP1B,ACTN4,MMP14
Pentose Phosphate Pathway	4,86E00	3,64E-01	NaN	TKT,PGD,G6PD,TALDO1
Actin Nucleation by ARP-WASP Complex	4,77E00	1,25E-01	NaN	ARPC5,ACTR2,ARPC3,ITGB1,ITGA2,ACTR3,ARPC1B
Regulation of Cellular Mechanics by Calpain Protease	4,71E00	1,23E-01	NaN	TLN1,VCL,ITGB1,ITGA2,ACTN1,ACTN4,CAPNS1
ILK Signaling	4,68E00	6,45E-02	NaN	FLNB,VIM,FN1,CFL1,VCL,ACTG1,DSP,ITGB1,FLNC,ACTN1,ACTN4,MYH9
Rac Signaling	4,64E00	8,65E-02	NaN	ARPC5,IQGAP1,ACTR2,CFL1,ARPC3,ITGB1,ITGA2,ACTR3,ARPC1B
Axonal Guidance Signaling	4,6E00	4,38E-02	NaN	ACTR2,MMP2,ARPC3,TUBB3,TUBB,PAPPA,ITGA2,DPYSL2,TUBA1C,ARPC1B,ACTR3,TUBB4B,ARPC5,GNAI2,CFL1,PFN1,ITGB1,RAP1B,PDIA3
14-3-3-mediated Signaling	4,24E00	7,69E-02	NaN	VIM,YWHAG,TUBB3,TUBB,PDIA3,TUBA1C,YWHAE,TUBB4B,PDCD6IP
Sertoli Cell-Sertoli Cell Junction Signaling	4,17E00	6,18E-02	NaN	A2M,VCL,ACTG1,TUBB3,TUBB,ITGB1,ITGA2,ACTN1,TUBA1C,ACTN4,TUBB4B
Fcγ Receptor-mediated Phagocytosis in Macrophages and Monocytes	4,17E00	8,6E-02	NaN	ARPC5,ACTR2,ARPC3,TLN1,ACTG1,RAB11B,ACTR3,ARPC1B
Caveolar-mediated Endocytosis Signaling	4,09E00	9,86E-02	NaN	FLNB,RAB5C,ACTG1,ITGB1,ITGA2,FLNC,ALB
GDP-glucose Biosynthesis	3,98E00	4,29E-01	NaN	PGM1,PGM3,HK1
Glucose and Glucose-1-phosphate Degradation	3,78E00	3,75E-01	NaN	PGM1,PGM3,HK1
Cdc42 Signaling	3,73E00	5,99E-02	NaN	ARPC5,IQGAP1,ACTR2,CFL1,ARPC3,ITGB1,ITGA2,PPP1CB,ACTR3,ARPC1B
Ephrin Receptor Signaling	3,59E00	5,75E-02	NaN	ARPC5,GNAI2,ACTR2,CFL1,ARPC3,ITGB1,ITGA2,RAP1B,ACTR3,ARPC1B
Virus Entry via Endocytic Pathways	3,47E00	7,87E-02	NaN	FLNB,ACTG1,ITGB1,CLTC,ITGA2,AP2A1,FLNC
Glycogen Degradation II	3,46E00	3E-01	NaN	PGM1,PYGB,PGM3
Hypoxia Signaling in the Cardiovascular System	3,42E00	9,23E-02	NaN	HSP90B1,UBE2V1,LDHA,HSP90AB1,HSP90AA1,P4HB
Agranulocyte Adhesion and Diapedesis	3,3E00	5,29E-02	NaN	GNAI2,FN1,MMP2,ACTG1,ITGB1,ITGA2,MSN,RDX,MYH9,MMP14
Glycogen Degradation III	3,2E00	2,5E-01	NaN	PGM1,PYGB,PGM3
Paxillin Signaling	3,14E00	6,93E-02	NaN	TLN1,VCL,ACTG1,ITGB1,ITGA2,ACTN1,ACTN4
Intrinsic Prothrombin Activation Pathway	3,09E00	1,38E-01	NaN	COL3A1,COL1A2,COL1A1,SERPINC1
Telomere Extension by Telomerase	2,9E00	2E-01	NaN	HNRNPA1,XRCC5,HNRNPA2B1
Granzyme B Signaling	2,82E00	1,88E-01	NaN	LMNB1,CYCS,LMNB2
Coagulation System	2,78E00	1,14E-01	NaN	A2M,SERPINA5,SERPINE1,SERPINC1
FAK Signaling	2,75E00	6,9E-02	NaN	TLN1,VCL,ACTG1,ITGB1,ITGA2,CAPNS1
Neuregulin Signaling	2,73E00	6,82E-02	NaN	ITGB1,HSP90B1,ITGA2,DCN,HSP90AB1,HSP90AA1
Antigen Presentation Pathway	2,69E00	1,08E-01	NaN	PSMB6,PDIA3,CANX,PSMB5
LXR/RXR Activation	2,68E00	5,79E-02	NaN	VTN,C3,SERPINF1,CLU,FASN,C9,ALB
Pentose Phosphate Pathway (Oxidative Branch)	2,68E00	4E-01	NaN	PGD,G6PD
Huntington's Disease Signaling	2,67E00	4,37E-02	NaN	CASP14,HSPA4,HSPA9,HSPA8,CLTC,HSPA5,CYCS,CTSD,ATP5B,CAPNS1
PI3K/AKT Signaling	2,64E00	5,69E-02	NaN	YWHAG,ITGB1,HSP90B1,ITGA2,HSP90AB1,YWHAE,HSP90AA1
tRNA Charging	2,6E00	1,03E-01	NaN	GARS,TARS,HARS,WARS
Glucocorticoid Receptor Signaling	2,59E00	4E-02	NaN	A2M,HSPA4,HSPA9,HSPA8,STAT1,HSP90B1,HSPA5,SERPINE1,HSP90AB1,HSP90AA1,ANXA1
FXR/RXR Activation	2,56E00	5,51E-02	NaN	VTN,C3,SERPINF1,CLU,FASN,C9,ALB
Mechanisms of Viral Exit from Host Cells	2,52E00	9,76E-02	NaN	ACTG1,LMNB1,LMNB2,PDCD6IP
Pyruvate Fermentation to Lactate	2,51E00	3,33E-01	NaN	LDHA,LDHB
Pentose Phosphate Pathway (Non-oxidative Branch)	2,51E00	3,33E-01	NaN	TKT,TALDO1
Agrin Interactions at Neuromuscular Junction	2,46E00	7,25E-02	NaN	ACTG1,ITGB1,ITGA2,LAMB1,LAMC1
Pyrimidine Deoxyribonucleotides De Novo Biosynthesis I	2,41E00	1,36E-01	NaN	CMPK1,NME1,AK1
TCA Cycle II (Eukaryotic)	2,35E00	1,3E-01	NaN	DLD,FH,MDH1
Granulocyte Adhesion and Diapedesis	2,33E00	4,52E-02	NaN	HSPB1,GNAI2,MMP2,ITGB1,ITGA2,MSN,RDX,MMP14
eNOS Signaling	2,3E00	4,93E-02	NaN	HSPA4,HSPA9,HSPA8,HSP90B1,HSPA5,HSP90AB1,HSP90AA1
fMLP Signaling in Neutrophils	2,28E00	5,56E-02	NaN	ARPC5,GNAI2,ACTR2,ARPC3,ACTR3,ARPC1B
NRF2-mediated Oxidative Stress Response	2,28E00	4,44E-02	NaN	GSTO1,CCT7,ACTG1,TXN,ERP29,PPIB,VCP,PRDX1
phagosome formation	2,26E00	5,5E-02	NaN	FN1,VTN,ITGB1,ITGA2,PDIA3,MARCKS
Regulation of eIF4 and p70S6K Signaling	2,23E00	4,79E-02	NaN	RPS18,ITGB1,ITGA2,EIF4A1,EIF3B,EIF3I,RPSA
EIF2 Signaling	2,21E00	4,32E-02	NaN	RPL12,RPL7,RPS18,PPP1CB,EIF4A1,EIF3B,EIF3I,RPSA
Lipid Antigen Presentation by CD1	2,2E00	1,15E-01	NaN	AP2A1,PDIA3,CANX
ERK/MAPK Signaling	2,18E00	4,28E-02	NaN	HSPB1,YWHAG,TLN1,STAT1,ITGB1,ITGA2,RAP1B,PPP1CB
Sucrose Degradation V (Mammalian)	2,14E00	2,22E-01	NaN	TPI1,ALDOA
UDP-N-acetyl-D-galactosamine Biosynthesis II	2,14E00	2,22E-01	NaN	PGM3,HK1
Semaphorin Signaling in Neurons	2,12E00	7,55E-02	NaN	CFL1,ITGB1,DPYSL3,DPYSL2
Gap Junction Signaling	2,09E00	4,52E-02	NaN	GNAI2,ACTG1,TUBB3,TUBB,PDIA3,TUBA1C,TUBB4B
Pyrimidine Ribonucleotides Interconversion	2,06E00	1,03E-01	NaN	CMPK1,NME1,AK1
Atherosclerosis Signaling	2E00	4,84E-02	NaN	PRDX6,CLU,COL3A1,COL1A2,COL1A1,ALB
Pyrimidine Ribonucleotides De Novo Biosynthesis	1,98E00	9,68E-02	NaN	CMPK1,NME1,AK1
Superpathway of Methionine Degradation	1,95E00	9,38E-02	NaN	DLD,MAT2A,AHCY
VEGF Signaling	1,94E00	5,43E-02	NaN	VCL,ACTG1,ACTN1,ACTN4,YWHAE
Acute Phase Response Signaling	1,9E00	4,14E-02	NaN	A2M,FN1,C3,SERPINF1,C9,SERPINE1,ALB
Mitochondrial Dysfunction	1,87E00	4,09E-02	NaN	PARK7,PRDX5,VDAC2,ATP5A1,CYCS,PRDX3,ATP5B
IGF-1 Signaling	1,85E00	5,15E-02	NaN	YWHAG,IGFBP7,IGFBP3,YWHAE,IGFBP6
Acetyl-CoA Biosynthesis III (from Citrate)	1,83E00	1E00	NaN	ACLY
CDK5 Signaling	1,81E00	5,05E-02	NaN	ITGB1,ITGA2,LAMB1,LAMC1,PPP1CB
Complement System	1,77E00	8,11E-02	NaN	C3,C9,CFH
HIF1α Signaling	1,76E00	4,9E-02	NaN	MMP2,LDHA,HSP90AA1,MMP14,LDHB
Colanic Acid Building Blocks Biosynthesis	1,76E00	1,43E-01	NaN	UGP2,UGDH
Aryl Hydrocarbon Receptor Signaling	1,76E00	4,29E-02	NaN	HSPB1,GSTO1,HSP90B1,HSP90AB1,CTSD,HSP90AA1
Vitamin-C Transport	1,7E00	1,33E-01	NaN	GSTO1,TXN
Parkinson's Signaling	1,65E00	1,25E-01	NaN	PARK7,CYCS
RAN Signaling	1,6E00	1,18E-01	NaN	RAN,KPNB1
Methionine Degradation I (to Homocysteine)	1,6E00	1,18E-01	NaN	MAT2A,AHCY
UDP-D-xylose and UDP-D-glucuronate Biosynthesis	1,54E00	5E-01	NaN	UGDH
Palmitate Biosynthesis I (Animals)	1,54E00	5E-01	NaN	FASN
Fatty Acid Biosynthesis Initiation II	1,54E00	5E-01	NaN	FASN
CD28 Signaling in T Helper Cells	1,52E00	4,24E-02	NaN	ARPC5,ACTR2,ARPC3,ACTR3,ARPC1B
p70S6K Signaling	1,51E00	4,2E-02	NaN	GNAI2,YWHAG,PDIA3,YWHAE,EEF2
Cysteine Biosynthesis III (mammalia)	1,51E00	1,05E-01	NaN	MAT2A,AHCY
TR/RXR Activation	1,44E00	4,71E-02	NaN	COL6A3,FASN,AKR1C1/AKR1C2,ENO1
Endoplasmic Reticulum Stress Pathway	1,43E00	9,52E-02	NaN	HSP90B1,HSPA5
Diphthamide Biosynthesis	1,36E00	3,33E-01	NaN	EEF2
Trehalose Degradation II (Trehalase)	1,36E00	3,33E-01	NaN	HK1
NADH Repair	1,36E00	3,33E-01	NaN	GAPDH
Hypusine Biosynthesis	1,36E00	3,33E-01	NaN	EIF5A
Thyroid Hormone Biosynthesis	1,36E00	3,33E-01	NaN	CTSD
S-adenosyl-L-methionine Biosynthesis	1,36E00	3,33E-01	NaN	MAT2A
Death Receptor Signaling	1,33E00	4,35E-02	NaN	HSPB1,ACTG1,CYCS,LMNA
Dendritic Cell Maturation	1,33E00	3,39E-02	NaN	STAT1,COL3A1,COL1A2,PDIA3,COL1A1,FSCN1
PPARα/RXRα Activation	1,31E00	3,35E-02	NaN	HSP90B1,FASN,PDIA3,CAND1,HSP90AB1,HSP90AA1
Glioma Invasiveness Signaling	1,29E00	5,26E-02	NaN	VTN,MMP2,TIMP2
Myc Mediated Apoptosis Signaling	1,27E00	5,17E-02	NaN	YWHAG,CYCS,YWHAE
Arsenate Detoxification I (Glutaredoxin)	1,24E00	2,5E-01	NaN	GSTO1
Uracil Degradation II (Reductive)	1,24E00	2,5E-01	NaN	DPYSL2
2-ketoglutarate Dehydrogenase Complex	1,24E00	2,5E-01	NaN	DLD
Branched-chain α-keto acid Dehydrogenase Complex	1,24E00	2,5E-01	NaN	DLD
Ascorbate Recycling (Cytosolic)	1,24E00	2,5E-01	NaN	GSTO1
Glutathione Redox Reactions II	1,24E00	2,5E-01	NaN	PDIA3
Thymine Degradation	1,24E00	2,5E-01	NaN	DPYSL2
Antioxidant Action of Vitamin C	1,24E00	4,04E-02	NaN	PRDX6,GSTO1,TXN,PDIA3
Breast Cancer Regulation by Stathmin1	1,2E00	3,14E-02	NaN	GNAI2,TUBB3,TUBB,PPP1CB,TUBA1C,TUBB4B
PCP pathway	1,18E00	4,76E-02	NaN	HSPB1,PFN1,CTHRC1
Glutathione-mediated Detoxification	1,17E00	6,9E-02	NaN	GSTO1,ANPEP
2-oxobutanoate Degradation I	1,15E00	2E-01	NaN	DLD
Mitotic Roles of Polo-Like Kinase	1,14E00	4,55E-02	NaN	HSP90B1,HSP90AB1,HSP90AA1
Corticotropin Releasing Hormone Signaling	1,09E00	3,6E-02	NaN	ARPC5,GNAI2,KRT1,RAP1B
Growth Hormone Signaling	1,09E00	4,35E-02	NaN	A2M,STAT1,IGFBP3
Tec Kinase Signaling	1,09E00	3,18E-02	NaN	GNAI2,ACTG1,STAT1,ITGB1,ITGA2
Thioredoxin Pathway	1,07E00	1,67E-01	NaN	TXN
Glycine Cleavage Complex	1,07E00	1,67E-01	NaN	DLD
UDP-N-acetyl-D-glucosamine Biosynthesis II	1,07E00	1,67E-01	NaN	PGM3
Glycogen Biosynthesis II (from UDP-D-Glucose)	1,07E00	1,67E-01	NaN	UGP2
Rapoport-Luebering Glycolytic Shunt	1,07E00	1,67E-01	NaN	PGAM1
NAD Biosynthesis III	1,07E00	1,67E-01	NaN	NAMPT
Chemokine Signaling	1,06E00	4,23E-02	NaN	GNAI2,CFL1,PPP1CB
Oncostatin M Signaling	1,05E00	5,88E-02	NaN	CHI3L1,STAT1
Inhibition of Angiogenesis by TSP1	1,05E00	5,88E-02	NaN	HSPG2,THBS1
Acetyl-CoA Biosynthesis I (Pyruvate Dehydrogenase Complex)	1,01E00	1,43E-01	NaN	DLD
Aspartate Degradation II	1,01E00	1,43E-01	NaN	MDH1
Reelin Signaling in Neurons	9,58E-01	3,8E-02	NaN	PAFAH1B1,ITGB1,ITGA2
Airway Pathology in Chronic Obstructive Pulmonary Disease	9,52E-01	1,25E-01	NaN	MMP2
Docosahexaenoic Acid (DHA) Signaling	9,52E-01	5,13E-02	NaN	SERPINF1,CYCS
Role of PKR in Interferon Induction and Antiviral Response	9,33E-01	5E-02	NaN	STAT1,CYCS
Protein Kinase A Signaling	9,33E-01	2,33E-02	NaN	FLNB,GNAI2,PYGB,YWHAG,RAP1B,PPP1CB,FLNC,PDIA3,YWHAE
Prostate Cancer Signaling	9,22E-01	3,66E-02	NaN	HSP90B1,HSP90AB1,HSP90AA1
Cellular Effects of Sildenafil (Viagra)	9,13E-01	3,1E-02	NaN	ACTG1,PPP1CB,PDIA3,MYH9
Production of Nitric Oxide and Reactive Oxygen Species in Macrophages	8,99E-01	2,78E-02	NaN	STAT1,CLU,RAP1B,PPP1CB,ALB
HIPPO signaling	8,77E-01	3,49E-02	NaN	YWHAG,PPP1CB,YWHAE
IL-12 Signaling and Production in Macrophages	8,7E-01	2,99E-02	NaN	RAB7A,STAT1,CLU,ALB
Bladder Cancer Signaling	8,66E-01	3,45E-02	NaN	MMP2,THBS1,MMP14
Phospholipase C Signaling	8,63E-01	2,53E-02	NaN	PEBP1,ITGB1,ITGA2,RAP1B,PPP1CB,MARCKS
Calcium Transport I	8,62E-01	1E-01	NaN	ANXA5
UVA-Induced MAPK Signaling	8,56E-01	3,41E-02	NaN	STAT1,PDIA3,CYCS
Crosstalk between Dendritic Cells and Natural Killer Cells	8,45E-01	3,37E-02	NaN	TLN1,ACTG1,FSCN1
PAK Signaling	8,45E-01	3,37E-02	NaN	CFL1,ITGB1,ITGA2
Apoptosis Signaling	8,45E-01	3,37E-02	NaN	CYCS,CAPNS1,LMNA
mTOR Signaling	8,42E-01	2,66E-02	NaN	RPS18,EIF4A1,EIF3B,EIF3I,RPSA
Salvage Pathways of Pyrimidine Ribonucleotides	8,05E-01	3,23E-02	NaN	CMPK1,NME1,AK1
PPAR Signaling	7,95E-01	3,19E-02	NaN	HSP90B1,HSP90AB1,HSP90AA1
Cell Cycle: G2/M DNA Damage Checkpoint Regulation	7,91E-01	4,08E-02	NaN	YWHAG,YWHAE
Amyotrophic Lateral Sclerosis Signaling	7,58E-01	3,06E-02	NaN	RAB5C,CYCS,CAPNS1
p53 Signaling	7,58E-01	3,06E-02	NaN	SERPINE2,THBS1,TP53I3
Bile Acid Biosynthesis, Neutral Pathway	7,57E-01	7,69E-02	NaN	AKR1C1/AKR1C2
Guanosine Nucleotides Degradation III	7,57E-01	7,69E-02	NaN	NT5E
Telomerase Signaling	7,49E-01	3,03E-02	NaN	HSP90B1,HSP90AB1,HSP90AA1
Nitric Oxide Signaling in the Cardiovascular System	7,4E-01	3E-02	NaN	HSP90B1,HSP90AB1,HSP90AA1
DNA Double-Strand Break Repair by Non-Homologous End Joining	7,28E-01	7,14E-02	NaN	XRCC5
Isoleucine Degradation I	7,28E-01	7,14E-02	NaN	DLD
Urate Biosynthesis/Inosine 5'-phosphate Degradation	7,28E-01	7,14E-02	NaN	NT5E
γ-glutamyl Cycle	7,01E-01	6,67E-02	NaN	ANPEP
HGF Signaling	6,98E-01	2,86E-02	NaN	ITGB1,ITGA2,RAP1B
Phospholipases	6,79E-01	3,45E-02	NaN	PRDX6,PDIA3
Extrinsic Prothrombin Activation Pathway	6,76E-01	6,25E-02	NaN	SERPINC1
Methylglyoxal Degradation III	6,76E-01	6,25E-02	NaN	AKR1C1/AKR1C2
Sphingosine-1-phosphate Signaling	6,66E-01	2,75E-02	NaN	CASP14,GNAI2,PDIA3
Oxidative Phosphorylation	6,66E-01	2,75E-02	NaN	ATP5A1,CYCS,ATP5B
Type I Diabetes Mellitus Signaling	6,59E-01	2,73E-02	NaN	STAT1,HSPD1,CYCS
Role of Tissue Factor in Cancer	6,59E-01	2,73E-02	NaN	CFL1,ITGB1,P4HB
Induction of Apoptosis by HIV1	6,57E-01	3,33E-02	NaN	SLC25A6,CYCS
Role of Osteoblasts, Osteoclasts and Chondrocytes in Rheumatoid Arthritis	6,57E-01	2,28E-02	NaN	ITGB1,ITGA2,LRP1,COL1A1,MMP14
Adenosine Nucleotides Degradation II	6,53E-01	5,88E-02	NaN	NT5E
Androgen Signaling	6,51E-01	2,7E-02	NaN	GNAI2,HSPA4,HSP90AA1
Valine Degradation I	6,31E-01	5,56E-02	NaN	DLD
Activation of IRF by Cytosolic Pattern Recognition Receptors	6,26E-01	3,17E-02	NaN	STAT1,PPIB
ERK5 Signaling	6,26E-01	3,17E-02	NaN	YWHAG,YWHAE
IL-6 Signaling	6,15E-01	2,59E-02	NaN	A2M,HSPB1,COL1A1
Glutathione Redox Reactions I	6,11E-01	5,26E-02	NaN	PRDX6
Endothelin-1 Signaling	6,08E-01	2,33E-02	NaN	PRDX6,CASP14,GNAI2,PDIA3
CCR3 Signaling in Eosinophils	6,08E-01	2,56E-02	NaN	GNAI2,CFL1,PPP1CB
Synaptic Long Term Potentiation	5,94E-01	2,52E-02	NaN	RAP1B,PPP1CB,PDIA3
Granzyme A Signaling	5,92E-01	5E-02	NaN	NME1
Purine Nucleotides Degradation II (Aerobic)	5,92E-01	5E-02	NaN	NT5E
Macropinocytosis Signaling	5,79E-01	2,94E-02	NaN	ITGB1,ACTN4
Melatonin Signaling	5,62E-01	2,86E-02	NaN	GNAI2,PDIA3
Maturity Onset Diabetes of Young (MODY) Signaling	5,56E-01	4,55E-02	NaN	GAPDH
GPCR-Mediated Integration of Enteroendocrine Signaling Exemplified by an L Cell	5,53E-01	2,82E-02	NaN	GNAI2,PDIA3
IL-8 Signaling	5,45E-01	2,17E-02	NaN	IQGAP1,GNAI2,MMP2,LASP1
NF-κB Activation by Viruses	5,36E-01	2,74E-02	NaN	ITGB1,ITGA2
Ephrin B Signaling	5,36E-01	2,74E-02	NaN	GNAI2,CFL1
IL-22 Signaling	5,24E-01	4,17E-02	NaN	STAT1
Tumoricidal Function of Hepatic Natural Killer Cells	5,24E-01	4,17E-02	NaN	CYCS
Role of JAK1, JAK2 and TYK2 in Interferon Signaling	5,24E-01	4,17E-02	NaN	STAT1
Triacylglycerol Degradation	5,24E-01	4,17E-02	NaN	PRDX6
HER-2 Signaling in Breast Cancer	5,13E-01	2,63E-02	NaN	MMP2,ITGB1
Role of JAK family kinases in IL-6-type Cytokine Signaling	5,1E-01	4E-02	NaN	STAT1
VDR/RXR Activation	4,98E-01	2,56E-02	NaN	IGFBP3,IGFBP6
NAD Salvage Pathway II	4,96E-01	3,85E-02	NaN	NT5E
Ceramide Signaling	4,83E-01	2,5E-02	NaN	CYCS,CTSD
IL-15 Production	4,82E-01	3,7E-02	NaN	STAT1
Synaptic Long Term Depression	4,6E-01	2,11E-02	NaN	PRDX6,GNAI2,PDIA3
GPCR-Mediated Nutrient Sensing in Enteroendocrine Cells	4,56E-01	2,38E-02	NaN	GNAI2,PDIA3
Role of p14/p19ARF in Tumor Suppression	4,45E-01	3,33E-02	NaN	NPM1
α-Adrenergic Signaling	4,37E-01	2,3E-02	NaN	GNAI2,PYGB
TGF-β Signaling	4,37E-01	2,3E-02	NaN	INHBA,SERPINE1
CTLA4 Signaling in Cytotoxic T Lymphocytes	4,3E-01	2,27E-02	NaN	CLTC,AP2A1
Cytotoxic T Lymphocyte-mediated Apoptosis of Target Cells	4,23E-01	3,12E-02	NaN	CYCS
IL-9 Signaling	4,03E-01	2,94E-02	NaN	STAT1
TWEAK Signaling	4,03E-01	2,94E-02	NaN	CYCS
Role of JAK2 in Hormone-like Cytokine Signaling	3,93E-01	2,86E-02	NaN	STAT1
Stearate Biosynthesis I (Animals)	3,84E-01	2,78E-02	NaN	FASN
Interferon Signaling	3,84E-01	2,78E-02	NaN	STAT1
Dopamine-DARPP32 Feedback in cAMP Signaling	3,75E-01	1,86E-02	NaN	GNAI2,PPP1CB,PDIA3
Tight Junction Signaling	3,52E-01	1,8E-02	NaN	VCL,ACTG1,MYH9
Neuroprotective Role of THOP1 in Alzheimer's Disease	3,5E-01	2,5E-02	NaN	YWHAE
Molecular Mechanisms of Cancer	3,49E-01	1,64E-02	NaN	GNAI2,ITGB1,ITGA2,RAP1B,LRP1,CYCS
Colorectal Cancer Metastasis Signaling	3,4E-01	1,69E-02	NaN	MMP2,STAT1,LRP1,MMP14
iNOS Signaling	3,2E-01	2,27E-02	NaN	STAT1
Calcium Signaling	3,13E-01	1,69E-02	NaN	TPM4,RAP1B,MYH9
AMPK Signaling	3,1E-01	1,68E-02	NaN	FASN,EEF2,AK1
MSP-RON Signaling Pathway	3,06E-01	2,17E-02	NaN	ACTG1
nNOS Signaling in Neurons	3E-01	2,13E-02	NaN	CAPNS1
Ephrin A Signaling	2,94E-01	2,08E-02	NaN	CFL1
p38 MAPK Signaling	2,89E-01	1,71E-02	NaN	HSPB1,STAT1
TNFR1 Signaling	2,87E-01	2,04E-02	NaN	CYCS
PTEN Signaling	2,85E-01	1,69E-02	NaN	ITGB1,ITGA2
Heparan Sulfate Biosynthesis (Late Stages)	2,81E-01	2E-02	NaN	PRDX6
P2Y Purigenic Receptor Signaling Pathway	2,81E-01	1,68E-02	NaN	GNAI2,PDIA3
Amyloid Processing	2,76E-01	1,96E-02	NaN	CAPNS1
Sperm Motility	2,74E-01	1,65E-02	NaN	PRDX6,PDIA3
Thrombin Signaling	2,73E-01	1,57E-02	NaN	GNAI2,PPP1CB,PDIA3
CD27 Signaling in Lymphocytes	2,7E-01	1,92E-02	NaN	CYCS
CNTF Signaling	2,7E-01	1,92E-02	NaN	STAT1
Lymphotoxin β Receptor Signaling	2,59E-01	1,85E-02	NaN	CYCS
Role of Pattern Recognition Receptors in Recognition of Bacteria and Viruses	2,56E-01	1,59E-02	NaN	C3,PTX3
Thrombopoietin Signaling	2,54E-01	1,82E-02	NaN	STAT1
PI3K Signaling in B Lymphocytes	2,5E-01	1,56E-02	NaN	C3,PDIA3
Wnt/Ca+ pathway	2,49E-01	1,79E-02	NaN	PDIA3
EGF Signaling	2,49E-01	1,79E-02	NaN	STAT1
Xenobiotic Metabolism Signaling	2,48E-01	1,48E-02	NaN	GSTO1,HSP90B1,HSP90AB1,HSP90AA1
Nur77 Signaling in T Lymphocytes	2,44E-01	1,75E-02	NaN	CYCS
Heparan Sulfate Biosynthesis	2,44E-01	1,75E-02	NaN	PRDX6
Insulin Receptor Signaling	2,31E-01	1,49E-02	NaN	PPP1CB,ACLY
Relaxin Signaling	2,28E-01	1,48E-02	NaN	GNAI2,RAP1B
Retinoic acid Mediated Apoptosis Signaling	2,21E-01	1,61E-02	NaN	CYCS
GM-CSF Signaling	2,21E-01	1,61E-02	NaN	STAT1
Antiproliferative Role of Somatostatin Receptor 2	2,17E-01	1,59E-02	NaN	RAP1B
Role of JAK1 and JAK3 in γc Cytokine Signaling	2,17E-01	1,59E-02	NaN	STAT1
Role of PI3K/AKT Signaling in the Pathogenesis of Influenza	2,13E-01	1,56E-02	NaN	GNAI2
Eicosanoid Signaling	2,13E-01	1,56E-02	NaN	PRDX6
GABA Receptor Signaling	2,01E-01	1,49E-02	NaN	AP2A1

## Sheet: BM MSC IRL
© 2000-2016 QIAGEN. All rights reserved.
Ingenuity Canonical Pathways	-log(p-value)	Ratio	z-score	Molecules
Protein Ubiquitination Pathway	2,18E01	1,8E-01	NaN	USP19,PSMB6,UBA1,PSMD3,PSMD7,HSPA13,HSPD1,PSMD6,PSMA3,PSMB5,USP5,PSME2,HSPE1,PSMD11,PSMB1,PSMA7,HSPA8,PSMB7,PSMA2,PSMD14,PSMB2,PSMB3,PSMD2,PSMA1,HSP90AA1,PSMA5,UBE2L3,PSMA4,DNAJC10,UCHL1,HSP90B1,PSMA6,UBE2N,PSME1,HSPB1,PSMD12,HSPA4,HSPA9,PSMB4,HSPA5,PSMC5,PSMD1,PSMD13,HSPH1,HSP90AB1,PSMC6
EIF2 Signaling	2,11E01	2,11E-01	NaN	RPL7A,EIF3M,RPL13A,RPS24,RPLP1,EIF3B,EIF3I,RPS20,RPL12,RPS13,RPS15A,RPS8,EIF4A1,RPS21,RPS25,RPL17,RPL11,RPS18,EIF3A,RPLP2,RPL22,RPS7,EIF3L,RPS2,RPL23A,RPS12,RPS3,RPSA,RPS16,RPL7,RPLP0,RPS9,RPS23,PPP1CB,RPS28,RPS4X,RRAS,EIF3F,RPL10A
Remodeling of Epithelial Adherens Junctions	1,76E01	3,38E-01	NaN	IQGAP1,ACTR2,ARPC3,VCL,TUBB3,TUBB,CTNNB1,TUBB6,MAPRE1,ACTN1,TUBA1C,NME1,ARPC1B,TUBB4B,ARPC2,ZYX,RAB5C,ARPC5,RAB7A,TUBA1A,TUBB2B,ACTN4,ARPC1A
Regulation of eIF4 and p70S6K Signaling	1,42E01	1,92E-01	NaN	EIF3M,RPS24,EIF3B,EIF3I,RPS20,RPS13,ITGB1,RPS15A,PPP2R1A,RPS8,EIF4A1,RPS21,RPS25,RPS18,EIF3A,RPS7,EIF3L,RPS2,RPS12,RPS3,RPSA,RPS16,RPS9,RPS23,RPS28,RPS4X,RRAS,EIF3F
Hepatic Fibrosis / Hepatic Stellate Cell Activation	1,25E01	1,58E-01	NaN	IGFBP4,TGFB1,MMP2,COL1A1,IL6,MYH9,A2M,COL12A1,FN1,IGFBP3,VEGFC,COL4A1,COL6A3,COL3A1,TGFB2,COL1A2,COL8A1,MYL9,MMP13,COL6A2,COL5A1,TIMP2,TNFRSF11B,COL5A2,COL4A2,TIMP1,SERPINE1,BAX,MMP1
Epithelial Adherens Junction Signaling	1,24E01	1,78E-01	NaN	IQGAP1,CDH2,CDC42,ACTR2,VCL,TUBB3,TUBB6,TUBA1C,ARPC1B,MYH9,ZYX,ARPC5,TUBA1A,ACTN4,ARPC1A,ARPC3,TUBB,CTNNB1,JUP,TGFB2,ACTN1,MYL9,TUBB4B,ARPC2,TUBB2B,RRAS
mTOR Signaling	1,14E01	1,49E-01	NaN	EIF3M,RPS24,EIF3B,EIF3I,RPS20,RPS13,RPS15A,PPP2R1A,RPS8,EIF4A1,RPS21,VEGFC,RPS25,RPS18,EIF3A,RPS7,EIF3L,RPS2,RPS12,RPS3,RPSA,RPS16,RPS9,RPS23,RPS28,RPS4X,RRAS,EIF3F
Actin Cytoskeleton Signaling	1,06E01	1,34E-01	NaN	IQGAP1,CDC42,ACTR2,VCL,ARPC1B,MYH9,ARPC5,FN1,CFL1,PFN1,ITGB1,ACTN4,ARPC1A,TLN1,ARPC3,FLNA,EZR,MYL12A,MSN,ACTN1,MYL9,CFL2,RDX,ARPC2,GSN,PPP1CB,GNG12,PFN2,RRAS
Germ Cell-Sertoli Cell Junction Signaling	9,9E00	1,5E-01	NaN	IQGAP1,CDH2,CDC42,TGFB1,VCL,TUBB3,TUBB,CTNNB1,TUBB6,JUP,TGFB2,ACTN1,TUBA1C,TUBB4B,CFL2,ZYX,A2M,TUBA1A,CFL1,GSN,ITGB1,TUBB2B,ACTN4,RRAS
Axonal Guidance Signaling	8,67E00	8,99E-02	NaN	CDC42,ACTR2,MMP2,TUBB3,TUBB6,GNB1,TUBA1C,ARPC1B,ADAMTS2,ARPC5,GNAI2,TUBA1A,CFL1,PFN1,ITGB1,SEMA7A,PSMD14,SDCBP,VEGFC,ARPC1A,ARPC3,GNB2L1,TUBB,VASP,MYL12A,DPYSL2,MYL9,MMP13,CFL2,ADAMTS1,TUBB4B,ARPC2,BMP1,TUBB2B,GNG12,PDIA3,PRKACA,PFN2,RRAS
RhoGDI Signaling	8,46E00	1,33E-01	NaN	CDH2,CDC42,ACTR2,ARPC3,GNB2L1,EZR,MYL12A,MSN,GDI2,GNB1,ARHGAP1,MYL9,ARPC1B,RDX,CFL2,ARPC2,ARPC5,GNAI2,CFL1,ITGB1,GNG12,CDH11,ARPC1A
RhoA Signaling	8,25E00	1,56E-01	NaN	ACTR2,ARPC3,EZR,MYL12A,MSN,ARHGAP1,MYL9,ARPC1B,SEPT2,RDX,CFL2,ARPC2,ARPC5,CFL1,PFN1,SEPT11,PPP1CB,PFN2,ARPC1A
Inhibition of Matrix Metalloproteases	7,81E00	2,82E-01	NaN	A2M,MMP3,MMP2,THBS2,HSPG2,LRP1,TIMP1,MMP13,MMP1,TIMP2,MMP14
14-3-3-mediated Signaling	7,76E00	1,54E-01	NaN	YWHAQ,YWHAG,TUBB3,TUBB,TUBB6,TUBA1C,YWHAE,YWHAH,TUBB4B,VIM,TUBA1A,TUBB2B,PDIA3,BAX,YWHAZ,YWHAB,RRAS,PDCD6IP
Caveolar-mediated Endocytosis Signaling	7,57E00	1,97E-01	NaN	FLNB,ITGAV,COPB2,FLNA,PTRF,COPG1,RAB5C,COPA,ITGB1,COPE,COPB1,FLNC,ARCN1,ALB
Integrin Signaling	7,22E00	1,14E-01	NaN	CDC42,ACTR2,TLN1,ITGAV,ARPC3,VCL,VASP,MYL12A,MYL9,ACTN1,ARPC1B,ARPC2,ZYX,ARF1,ARPC5,ITGB1,ARF4,PPP1CB,ARF5,ACTN4,RRAS,CAPNS1,ARPC1A
Signaling by Rho Family GTPases	7,19E00	1,07E-01	NaN	IQGAP1,CDH2,CDC42,ACTR2,GNB1,ARPC1B,VIM,ARPC5,GNAI2,CFL1,SEPT11,ITGB1,CDH11,ARPC1A,ARPC3,GNB2L1,EZR,MYL12A,MSN,MYL9,SEPT2,RDX,CFL2,ARPC2,GNG12
Regulation of Actin-based Motility by Rho	6,98E00	1,65E-01	NaN	CDC42,ACTR2,ARPC3,MYL12A,MYL9,ARPC1B,ARPC2,ARPC5,CFL1,PFN1,GSN,ITGB1,PPP1CB,PFN2,ARPC1A
Clathrin-mediated Endocytosis Signaling	6,58E00	1,14E-01	NaN	CDC42,ACTR2,ARPC3,CLTC,AP2B1,ARPC1B,AP1B1,ARPC2,RAB5C,ARPC5,RAB7A,APOB,HSPA8,CLU,ITGB1,AP2A1,APOE,RAB11B,VEGFC,ALB,ARPC1A
Glycolysis I	6,3E00	3,2E-01	NaN	PFKP,TPI1,PGAM1,PGK1,PKM,GAPDH,ENO1,GPI
tRNA Charging	5,68E00	2,31E-01	NaN	GARS,TARS,HARS,DARS,CARS,LARS,RARS,KARS,WARS
Leukocyte Extravasation Signaling	5,5E00	1,01E-01	NaN	CDC42,MMP2,VCL,CTNNB1,VASP,EZR,MSN,ARHGAP1,ACTN1,MMP13,EDIL3,RDX,TIMP2,MMP3,GNAI2,ITGB1,TIMP1,ACTN4,MMP1,MMP14
phagosome maturation	5,4E00	1,25E-01	NaN	DYNC1H1,TUBB3,TUBB,TUBB6,TUBA1C,PRDX1,TUBB4B,PRDX6,RAB5C,RAB7A,TUBA1A,PRDX5,TUBB2B,CANX,PRDX2
ILK Signaling	5,33E00	1,02E-01	NaN	FLNB,CDC42,VCL,FLNA,RSU1,CTNNB1,MYL9,ACTN1,CFL2,MYH9,VIM,FN1,CFL1,ITGB1,PPP2R1A,FLNC,ACTN4,VEGFC,NACA
Unfolded protein response	5,32E00	1,85E-01	NaN	HSPA4,HSPA9,HSPA8,HSP90B1,HSPA5,CANX,HSPH1,VCP,MBTPS1,P4HB
Actin Nucleation by ARP-WASP Complex	5,17E00	1,79E-01	NaN	ARPC2,ARPC5,CDC42,ACTR2,ARPC3,ITGB1,VASP,ARPC1B,RRAS,ARPC1A
Ephrin Receptor Signaling	5,16E00	1,03E-01	NaN	CDC42,ACTR2,ARPC3,GNB2L1,GNB1,ARPC1B,CFL2,ARPC2,ARPC5,GNAI2,CFL1,ITGB1,GNG12,ANGPT1,SDCBP,RRAS,VEGFC,ARPC1A
Gluconeogenesis I	5,14E00	2,8E-01	NaN	PGAM1,PGK1,GAPDH,MDH2,ENO1,MDH1,GPI
IGF-1 Signaling	5,09E00	1,34E-01	NaN	IGFBP4,YWHAQ,YWHAG,IGFBP2,YWHAE,YWHAH,IGFBP7,IGFBP3,PRKACA,YWHAZ,RRAS,YWHAB,IGFBP6
Sertoli Cell-Sertoli Cell Junction Signaling	5,02E00	1,01E-01	NaN	CDC42,VCL,TUBB3,TUBB,CTNNB1,TUBB6,JUP,ACTN1,TUBA1C,TUBB4B,A2M,TUBA1A,ITGB1,TUBB2B,PRKACA,ACTN4,RRAS,SPTAN1
LXR/RXR Activation	4,69E00	1,16E-01	NaN	C3,SERPINF1,FASN,IL6,TNFRSF11B,C4A/C4B,APOB,VTN,CLU,APOE,AHSG,PLTP,ECHS1,ALB
Myc Mediated Apoptosis Signaling	4,2E00	1,55E-01	NaN	YWHAQ,YWHAG,BAX,CYCS,YWHAE,YWHAZ,YWHAH,YWHAB,RRAS
Acute Phase Response Signaling	4,18E00	9,47E-02	NaN	C3,SERPINF1,HNRNPK,ITIH3,C5,IL6,A2M,TNFRSF11B,C4A/C4B,FN1,SERPINE1,C1S,AHSG,SERPING1,RRAS,ALB
Aldosterone Signaling in Epithelial Cells	4,16E00	9,87E-02	NaN	DNAJC10,HSP90B1,HSPA13,HSPD1,HSPE1,HSPB1,HSPA9,HSPA4,HSPA8,HSPA5,PDIA3,HSPH1,HSP90AB1,HSP90AA1,AHCY
Ephrin B Signaling	4,13E00	1,37E-01	NaN	GNAI2,CDC42,CFL1,GNB2L1,CTNNB1,HNRNPK,GNB1,CAP1,GNG12,CFL2
Coagulation System	4,11E00	2E-01	NaN	A2M,SERPINA5,TFPI,PLAU,SERPINE1,F5,SERPINC1
Rac Signaling	4,09E00	1,15E-01	NaN	ARPC2,ARPC5,IQGAP1,CDC42,ACTR2,CFL1,ARPC3,ITGB1,ARPC1B,RRAS,CFL2,ARPC1A
PI3K/AKT Signaling	3,99E00	1,06E-01	NaN	YWHAQ,YWHAG,CTNNB1,HSP90B1,YWHAE,YWHAH,ITGB1,PPP2R1A,HSP90AB1,YWHAZ,HSP90AA1,RRAS,YWHAB
Atherosclerosis Signaling	3,95E00	1,05E-01	NaN	TGFB1,COL3A1,COL1A2,COL1A1,MMP13,IL6,PRDX6,MMP3,APOB,CLU,APOE,MMP1,ALB
Complement System	3,95E00	1,89E-01	NaN	C4A/C4B,C3,CFI,C5,C1S,SERPING1,CFH
fMLP Signaling in Neutrophils	3,93E00	1,11E-01	NaN	ARPC2,ARPC5,GNAI2,CDC42,ACTR2,ARPC3,GNB2L1,GNB1,GNG12,ARPC1B,RRAS,ARPC1A
Fcγ Receptor-mediated Phagocytosis in Macrophages and Monocytes	3,89E00	1,18E-01	NaN	ARPC2,ARPC5,CDC42,ACTR2,ARPC3,TLN1,VASP,EZR,RAB11B,ARPC1B,ARPC1A
Pentose Phosphate Pathway	3,62E00	3,64E-01	NaN	TKT,PGD,G6PD,TALDO1
Breast Cancer Regulation by Stathmin1	3,56E00	8,38E-02	NaN	CDC42,TUBB3,GNB2L1,TUBB,TUBB6,GNB1,TUBA1C,TUBB4B,GNAI2,TUBA1A,TUBB2B,PPP1CB,PPP2R1A,GNG12,PRKACA,RRAS
HIF1α Signaling	3,54E00	1,08E-01	NaN	MMP3,MMP2,LDHA,MMP13,HSP90AA1,APEX1,RRAS,VEGFC,MMP1,MMP14,LDHB
Regulation of Cellular Mechanics by Calpain Protease	3,49E00	1,4E-01	NaN	TLN1,VCL,ITGB1,EZR,ACTN1,ACTN4,RRAS,CAPNS1
Virus Entry via Endocytic Pathways	3,41E00	1,12E-01	NaN	FLNB,CDC42,FLNA,ITGB1,CLTC,AP2B1,AP2A1,FLNC,RRAS,AP1B1
Oncostatin M Signaling	3,28E00	1,76E-01	NaN	MMP3,CHI3L1,PLAU,MMP13,RRAS,MMP1
TCA Cycle II (Eukaryotic)	3,25E00	2,17E-01	NaN	DLD,FH,ACO1,MDH2,MDH1
Tight Junction Signaling	3,19E00	8,38E-02	NaN	CDC42,TGFB1,VCL,CTNNB1,VASP,TGFB2,MYL9,MYH9,TNFRSF11B,PPP2R1A,VAPA,PRKACA,NUDT21,SPTAN1
Cdc42 Signaling	3,19E00	8,38E-02	NaN	IQGAP1,CDC42,ACTR2,ARPC3,MYL12A,MYL9,ARPC1B,CFL2,ARPC2,ARPC5,CFL1,ITGB1,PPP1CB,ARPC1A
Huntington's Disease Signaling	3,14E00	7,42E-02	NaN	GNB2L1,PENK,CLTC,GNB1,PSME1,CYCS,PSME2,HSPA9,HSPA4,HSPA8,HSPA5,GNG12,BAX,CTSD,ATP5B,TGM2,CAPNS1
Glucocorticoid Receptor Signaling	3,06E00	6,91E-02	NaN	TGFB1,PLAU,HSP90B1,TGFB2,IL6,YWHAH,ANXA1,A2M,HSPA9,HSPA4,HMGB1,HSPA8,HSPA5,SERPINE1,HSP90AB1,PRKACA,HSP90AA1,RRAS,MMP1
Protein Kinase A Signaling	3,05E00	6,22E-02	NaN	FLNB,YWHAQ,YWHAG,TGFB1,GNB2L1,FLNA,CTNNB1,VASP,MYL12A,GNB1,TGFB2,MYL9,YWHAE,YWHAH,GNAI2,PYGB,PPP1CB,GNG12,PDIA3,FLNC,PRKACA,YWHAZ,APEX1,YWHAB
GDP-glucose Biosynthesis	3,04E00	4,29E-01	NaN	PGM1,PGM3,HK1
Colorectal Cancer Metastasis Signaling	2,99E00	7,2E-02	NaN	MMP2,TGFB1,GNB2L1,CTNNB1,GNB1,TGFB2,MMP13,IL6,MMP3,GNG12,LRP1,BAX,PRKACA,RRAS,VEGFC,MMP1,MMP14
Lipid Antigen Presentation by CD1	2,99E00	1,92E-01	NaN	AP2B1,AP2A1,PDIA3,CANX,AP1B1
p70S6K Signaling	2,97E00	9,24E-02	NaN	GNAI2,YWHAQ,YWHAG,PPP2R1A,PDIA3,YWHAE,YWHAZ,YWHAH,EEF2,YWHAB,RRAS
Semaphorin Signaling in Neurons	2,96E00	1,32E-01	NaN	CFL1,ITGB1,DPYSL3,SEMA7A,ARHGAP1,DPYSL2,CFL2
Aryl Hydrocarbon Receptor Signaling	2,9E00	8,57E-02	NaN	HSPB1,GSTO1,TGFB1,HSP90B1,TGFB2,BAX,HSP90AB1,IL6,GSTP1,CTSD,HSP90AA1,TGM2
Glucose and Glucose-1-phosphate Degradation	2,85E00	3,75E-01	NaN	PGM1,PGM3,HK1
RAN Signaling	2,82E00	2,35E-01	NaN	IPO5,RAN,KPNB1,TNPO1
IL-8 Signaling	2,78E00	7,61E-02	NaN	IQGAP1,MMP2,ITGAV,GNB2L1,VASP,GNB1,MYL9,LASP1,GNAI2,GNG12,ANGPT1,BAX,RRAS,VEGFC
Intrinsic Prothrombin Activation Pathway	2,77E00	1,72E-01	NaN	COL3A1,COL1A2,COL1A1,F5,SERPINC1
Glioma Invasiveness Signaling	2,77E00	1,23E-01	NaN	VTN,ITGAV,MMP2,PLAU,TIMP1,RRAS,TIMP2
FXR/RXR Activation	2,74E00	8,66E-02	NaN	C4A/C4B,APOB,VTN,C3,SERPINF1,CLU,FASN,APOE,AHSG,PLTP,ALB
Role of Tissue Factor in Cancer	2,69E00	9,09E-02	NaN	CDC42,CFL1,ITGAV,ITGB1,MMP13,RRAS,VEGFC,MMP1,CFL2,P4HB
UDP-N-acetyl-D-galactosamine Biosynthesis II	2,68E00	3,33E-01	NaN	PGM3,HK1,GPI
Agranulocyte Adhesion and Diapedesis	2,67E00	7,41E-02	NaN	MMP2,EZR,MSN,C5,MYL9,MMP13,RDX,MYH9,MMP3,GNAI2,FN1,ITGB1,MMP1,MMP14
Mitochondrial Dysfunction	2,62E00	7,6E-02	NaN	HSD17B10,VDAC1,PARK7,CYCS,PRDX3,CYB5R3,ATP5O,PRDX5,GSR,ATP5A1,ACO1,MT-CO2,ATP5B
Inosine-5'-phosphate Biosynthesis II	2,56E00	6,67E-01	NaN	PAICS,ATIC
Glycogen Degradation II	2,53E00	3E-01	NaN	PGM1,PYGB,PGM3
Gap Junction Signaling	2,52E00	7,74E-02	NaN	GNAI2,TUBA1A,TUBB3,CTNNB1,TUBB,TUBB6,TUBB2B,PDIA3,PRKACA,TUBA1C,RRAS,TUBB4B
ERK5 Signaling	2,51E00	1,11E-01	NaN	YWHAQ,YWHAG,YWHAE,YWHAZ,YWHAH,YWHAB,RRAS
Granulocyte Adhesion and Diapedesis	2,49E00	7,34E-02	NaN	MMP2,EZR,MSN,C5,MMP13,RDX,HSPB1,TNFRSF11B,MMP3,GNAI2,ITGB1,MMP1,MMP14
Hypoxia Signaling in the Cardiovascular System	2,44E00	1,08E-01	NaN	UBE2L3,HSP90B1,LDHA,UBE2N,HSP90AB1,HSP90AA1,P4HB
Cell Cycle: G2/M DNA Damage Checkpoint Regulation	2,43E00	1,22E-01	NaN	YWHAQ,YWHAG,YWHAE,YWHAZ,YWHAH,YWHAB
Paxillin Signaling	2,42E00	8,91E-02	NaN	ARF1,CDC42,ITGAV,TLN1,VCL,ITGB1,ACTN1,ACTN4,RRAS
Pyrimidine Deoxyribonucleotides De Novo Biosynthesis I	2,39E00	1,82E-01	NaN	DUT,CMPK1,NME1,AK1
HIPPO signaling	2,32E00	9,3E-02	NaN	YWHAQ,YWHAG,PPP2R1A,PPP1CB,YWHAE,YWHAZ,YWHAH,YWHAB
Glycogen Degradation III	2,29E00	2,5E-01	NaN	PGM1,PYGB,PGM3
Bladder Cancer Signaling	2,29E00	9,2E-02	NaN	MMP3,MMP2,THBS1,MMP13,RRAS,VEGFC,MMP1,MMP14
Heme Degradation	2,27E00	5E-01	NaN	BLVRB,BLVRA
Glutathione Redox Reactions II	2,27E00	5E-01	NaN	GSR,PDIA3
Isoleucine Degradation I	2,09E00	2,14E-01	NaN	HSD17B10,DLD,ECHS1
Pentose Phosphate Pathway (Oxidative Branch)	2,06E00	4E-01	NaN	PGD,G6PD
NRF2-mediated Oxidative Stress Response	2,02E00	6,67E-02	NaN	GSTO1,CCT7,DNAJC10,CBR1,GSR,ERP29,TXNRD1,PPIB,VCP,GSTP1,PRDX1,RRAS
Telomere Extension by Telomerase	2,01E00	2E-01	NaN	XRCC6,XRCC5,HNRNPA2B1
Pyrimidine Ribonucleotides Interconversion	1,95E00	1,38E-01	NaN	CANT1,CMPK1,NME1,AK1
Extrinsic Prothrombin Activation Pathway	1,92E00	1,88E-01	NaN	TFPI,F5,SERPINC1
Parkinson's Signaling	1,92E00	1,88E-01	NaN	PARK7,UCHL1,CYCS
ERK/MAPK Signaling	1,89E00	6,42E-02	NaN	HSPB1,YWHAQ,YWHAG,TLN1,ITGB1,PPP2R1A,PPP1CB,PRKACA,YWHAZ,YWHAH,YWHAB,RRAS
Pyruvate Fermentation to Lactate	1,89E00	3,33E-01	NaN	LDHA,LDHB
Pentose Phosphate Pathway (Non-oxidative Branch)	1,89E00	3,33E-01	NaN	TKT,TALDO1
UDP-N-acetyl-D-glucosamine Biosynthesis II	1,89E00	3,33E-01	NaN	GFPT1,PGM3
Methionine Degradation I (to Homocysteine)	1,85E00	1,76E-01	NaN	MAT2A,AHCY,PRMT1
Pyrimidine Ribonucleotides De Novo Biosynthesis	1,85E00	1,29E-01	NaN	CANT1,CMPK1,NME1,AK1
Superpathway of Methionine Degradation	1,8E00	1,25E-01	NaN	DLD,MAT2A,AHCY,PRMT1
α-Adrenergic Signaling	1,76E00	8,05E-02	NaN	GNAI2,PYGB,GNB2L1,GNB1,GNG12,PRKACA,RRAS
Aspartate Degradation II	1,75E00	2,86E-01	NaN	MDH2,MDH1
Role of Osteoblasts, Osteoclasts and Chondrocytes in Rheumatoid Arthritis	1,75E00	5,94E-02	NaN	TGFB1,CTNNB1,COL1A1,MMP13,IL6,TNFRSF11B,MMP3,GSN,ITGB1,BMP1,LRP1,MMP1,MMP14
G Beta Gamma Signaling	1,74E00	7,95E-02	NaN	GNAI2,CDC42,GNB2L1,GNB1,GNG12,PRKACA,RRAS
Agrin Interactions at Neuromuscular Junction	1,72E00	8,7E-02	NaN	CDC42,ITGB1,LAMB1,LAMC1,DAG1,RRAS
Cysteine Biosynthesis III (mammalia)	1,72E00	1,58E-01	NaN	MAT2A,AHCY,PRMT1
PAK Signaling	1,71E00	7,87E-02	NaN	CDC42,CFL1,ITGB1,MYL12A,MYL9,RRAS,CFL2
Cardiac Hypertrophy Signaling	1,69E00	5,83E-02	NaN	TGFB1,GNB2L1,MYL12A,GNB1,TGFB2,MYL9,IL6,HSPB1,GNAI2,GNG12,PDIA3,PRKACA,RRAS
Androgen Signaling	1,68E00	7,21E-02	NaN	GNAI2,HSPA4,SHBG,GNB2L1,GNB1,GNG12,PRKACA,HSP90AA1
PPARα/RXRα Activation	1,65E00	6,15E-02	NaN	TGFB1,HSP90B1,FASN,TGFB2,PDIA3,CAND1,HSP90AB1,PRKACA,IL6,HSP90AA1,RRAS
VEGF Signaling	1,64E00	7,61E-02	NaN	VCL,ACTN1,ELAVL1,ACTN4,YWHAE,RRAS,VEGFC
Airway Pathology in Chronic Obstructive Pulmonary Disease	1,63E00	2,5E-01	NaN	MMP2,MMP1
Endoplasmic Reticulum Stress Pathway	1,6E00	1,43E-01	NaN	HSP90B1,HSPA5,MBTPS1
Antigen Presentation Pathway	1,59E00	1,08E-01	NaN	PSMB6,PDIA3,CANX,PSMB5
CCR3 Signaling in Eosinophils	1,56E00	6,84E-02	NaN	GNAI2,CFL1,GNB2L1,GNB1,PPP1CB,GNG12,RRAS,CFL2
Polyamine Regulation in Colon Cancer	1,54E00	1,36E-01	NaN	CTNNB1,PSME1,PSME2
Acetyl-CoA Biosynthesis III (from Citrate)	1,51E00	1E00	NaN	ACLY
eNOS Signaling	1,51E00	6,34E-02	NaN	HSPA4,HSPA9,HSPA8,HSP90B1,HSPA5,HSP90AB1,PRKACA,HSP90AA1,VEGFC
HMGB1 Signaling	1,5E00	6,67E-02	NaN	TNFRSF11B,CDC42,HMGB1,TGFB1,TGFB2,SERPINE1,IL6,RRAS
CDK5 Signaling	1,49E00	7,07E-02	NaN	ITGB1,LAMB1,LAMC1,PPP2R1A,PPP1CB,PRKACA,RRAS
Calcium Transport I	1,45E00	2E-01	NaN	ANXA5,ATP2A2
Induction of Apoptosis by HIV1	1,44E00	8,33E-02	NaN	TNFRSF11B,SLC25A5,SLC25A6,BAX,CYCS
Prostate Cancer Signaling	1,4E00	7,32E-02	NaN	CTNNB1,HSP90B1,HSP90AB1,GSTP1,HSP90AA1,RRAS
Purine Nucleotides De Novo Biosynthesis II	1,37E00	1,82E-01	NaN	PAICS,ATIC
IL-15 Production	1,31E00	1,11E-01	NaN	TWF1,IL6,PTK7
Role of NFAT in Cardiac Hypertrophy	1,31E00	5,59E-02	NaN	GNAI2,TGFB1,GNB2L1,GNB1,TGFB2,GNG12,PDIA3,PRKACA,IL6,RRAS
TGF-β Signaling	1,29E00	6,9E-02	NaN	INHBA,CDC42,TGFB1,TGFB2,SERPINE1,RRAS
Mitotic Roles of Polo-Like Kinase	1,29E00	7,58E-02	NaN	TGFB1,HSP90B1,PPP2R1A,HSP90AB1,HSP90AA1
Cardiac β-adrenergic Signaling	1,28E00	6,02E-02	NaN	GNB2L1,GNB1,PPP2R1A,PPP1CB,GNG12,ATP2A2,PRKACA,APEX1
Neuregulin Signaling	1,28E00	6,82E-02	NaN	ITGB1,HSP90B1,DCN,HSP90AB1,HSP90AA1,RRAS
Apoptosis Signaling	1,26E00	6,74E-02	NaN	BAX,CYCS,RRAS,CAPNS1,LMNA,SPTAN1
Glutathione-mediated Detoxification	1,24E00	1,03E-01	NaN	GSTO1,ANPEP,GSTP1
UDP-D-xylose and UDP-D-glucuronate Biosynthesis	1,22E00	5E-01	NaN	UGDH
Guanine and Guanosine Salvage I	1,22E00	5E-01	NaN	HPRT1
Spermine Biosynthesis	1,22E00	5E-01	NaN	SMS
L-DOPA Degradation	1,22E00	5E-01	NaN	COMT
Palmitate Biosynthesis I (Animals)	1,22E00	5E-01	NaN	FASN
Fatty Acid Biosynthesis Initiation II	1,22E00	5E-01	NaN	FASN
Glutamate Biosynthesis II	1,22E00	5E-01	NaN	GLUD1
Glutamate Degradation X	1,22E00	5E-01	NaN	GLUD1
DNA Double-Strand Break Repair by Non-Homologous End Joining	1,18E00	1,43E-01	NaN	XRCC6,XRCC5
Colanic Acid Building Blocks Biosynthesis	1,18E00	1,43E-01	NaN	GPI,UGDH
Gα12/13 Signaling	1,17E00	5,98E-02	NaN	CDH2,CDC42,CTNNB1,MYL12A,MYL9,CDH11,RRAS
CD28 Signaling in T Helper Cells	1,15E00	5,93E-02	NaN	ARPC2,ARPC5,CDC42,ACTR2,ARPC3,ARPC1B,ARPC1A
P2Y Purigenic Receptor Signaling Pathway	1,13E00	5,88E-02	NaN	GNAI2,GNB2L1,GNB1,GNG12,PDIA3,PRKACA,RRAS
Chondroitin Sulfate Degradation (Metazoa)	1,12E00	1,33E-01	NaN	HEXB,CEMIP
Vitamin-C Transport	1,12E00	1,33E-01	NaN	GSTO1,TXNRD1
G Protein Signaling Mediated by Tubby	1,1E00	9,09E-02	NaN	GNB2L1,GNB1,GNG12
Amyotrophic Lateral Sclerosis Signaling	1,09E00	6,12E-02	NaN	RAB5C,BAX,CYCS,SSR4,VEGFC,CAPNS1
Dermatan Sulfate Degradation (Metazoa)	1,07E00	1,25E-01	NaN	HEXB,CEMIP
Inhibition of Angiogenesis by TSP1	1,07E00	8,82E-02	NaN	TGFB1,HSPG2,THBS1
Nitric Oxide Signaling in the Cardiovascular System	1,06E00	6E-02	NaN	HSP90B1,ATP2A2,HSP90AB1,PRKACA,HSP90AA1,VEGFC
Diphthamide Biosynthesis	1,05E00	3,33E-01	NaN	EEF2
Trehalose Degradation II (Trehalase)	1,05E00	3,33E-01	NaN	HK1
NADH Repair	1,05E00	3,33E-01	NaN	GAPDH
Methylglyoxal Degradation I	1,05E00	3,33E-01	NaN	GLO1
Hypusine Biosynthesis	1,05E00	3,33E-01	NaN	EIF5A
Thyroid Hormone Biosynthesis	1,05E00	3,33E-01	NaN	CTSD
Oxidized GTP and dGTP Detoxification	1,05E00	3,33E-01	NaN	RUVBL2
S-adenosyl-L-methionine Biosynthesis	1,05E00	3,33E-01	NaN	MAT2A
Reelin Signaling in Neurons	1,02E00	6,33E-02	NaN	PAFAH1B2,PAFAH1B1,ITGB1,APOE,PAFAH1B3
Heparan Sulfate Biosynthesis	1,01E00	7,02E-02	NaN	PRDX6,EXT1,EXT2,XYLT1
Ceramide Signaling	1,01E00	6,25E-02	NaN	TNFRSF11B,PPP2R1A,CYCS,CTSD,RRAS
AMPK Signaling	1E00	5,03E-02	NaN	PFKP,CAB39,PPP2R1A,FASN,ELAVL1,PRKACA,EEF2,AK2,AK1
Valine Degradation I	9,84E-01	1,11E-01	NaN	DLD,ECHS1
Phospholipase C Signaling	9,46E-01	4,64E-02	NaN	GNB2L1,ITGB1,MYL12A,GNB1,PPP1CB,GNG12,MYL9,RRAS,TGM2,MARCKS,AHNAK
Glutathione Redox Reactions I	9,44E-01	1,05E-01	NaN	PRDX6,GSR
Docosahexaenoic Acid (DHA) Signaling	9,34E-01	7,69E-02	NaN	SERPINF1,BAX,CYCS
Arsenate Detoxification I (Glutaredoxin)	9,32E-01	2,5E-01	NaN	GSTO1
Uracil Degradation II (Reductive)	9,32E-01	2,5E-01	NaN	DPYSL2
2-ketoglutarate Dehydrogenase Complex	9,32E-01	2,5E-01	NaN	DLD
Branched-chain α-keto acid Dehydrogenase Complex	9,32E-01	2,5E-01	NaN	DLD
Ascorbate Recycling (Cytosolic)	9,32E-01	2,5E-01	NaN	GSTO1
Thymine Degradation	9,32E-01	2,5E-01	NaN	DPYSL2
IL-12 Signaling and Production in Macrophages	9,29E-01	5,22E-02	NaN	RAB7A,APOB,TGFB1,CLU,TGFB2,APOE,ALB
phagosome formation	9,28E-01	5,5E-02	NaN	FN1,VTN,ITGB1,MRC2,PDIA3,MARCKS
Granzyme A Signaling	9,07E-01	1E-01	NaN	NME1,APEX1
Role of Macrophages, Fibroblasts and Endothelial Cells in Rheumatoid Arthritis	9,06E-01	4,39E-02	NaN	TGFB1,CTNNB1,C5,MMP13,IL6,TNFRSF11B,MMP3,FN1,PDIA3,LRP1,RRAS,VEGFC,MMP1
Antiproliferative Role of Somatostatin Receptor 2	8,96E-01	6,35E-02	NaN	GNB2L1,GNB1,GNG12,RRAS
PCP pathway	8,96E-01	6,35E-02	NaN	HSPB1,PFN1,CTHRC1,PFN2
FAK Signaling	8,92E-01	5,75E-02	NaN	TLN1,VCL,ITGB1,RRAS,CAPNS1
CTLA4 Signaling in Cytotoxic T Lymphocytes	8,76E-01	5,68E-02	NaN	CLTC,PPP2R1A,AP2B1,AP2A1,AP1B1
Thrombin Signaling	8,75E-01	4,71E-02	NaN	GNAI2,GNB2L1,MYL12A,GNB1,PPP1CB,GNG12,PDIA3,MYL9,RRAS
2-oxobutanoate Degradation I	8,41E-01	2E-01	NaN	DLD
IL-6 Signaling	8,36E-01	5,17E-02	NaN	A2M,TNFRSF11B,HSPB1,COL1A1,IL6,RRAS
IL-1 Signaling	8,33E-01	5,49E-02	NaN	GNAI2,GNB2L1,GNB1,GNG12,PRKACA
Factors Promoting Cardiogenesis in Vertebrates	8,19E-01	5,43E-02	NaN	TGFB1,CTNNB1,BMP1,TGFB2,LRP1
Macropinocytosis Signaling	8,09E-01	5,88E-02	NaN	CDC42,ITGB1,ACTN4,RRAS
CCR5 Signaling in Macrophages	7,93E-01	5,8E-02	NaN	GNAI2,GNB2L1,GNB1,GNG12
PPAR Signaling	7,92E-01	5,32E-02	NaN	TNFRSF11B,HSP90B1,HSP90AB1,HSP90AA1,RRAS
Gαi Signaling	7,88E-01	5E-02	NaN	GNAI2,GNB2L1,GNB1,GNG12,PRKACA,RRAS
Tumoricidal Function of Hepatic Natural Killer Cells	7,79E-01	8,33E-02	NaN	BAX,CYCS
Arginine Biosynthesis IV	7,69E-01	1,67E-01	NaN	GLUD1
Thioredoxin Pathway	7,69E-01	1,67E-01	NaN	TXNRD1
Glycine Cleavage Complex	7,69E-01	1,67E-01	NaN	DLD
Glycogen Biosynthesis II (from UDP-D-Glucose)	7,69E-01	1,67E-01	NaN	GBE1
Rapoport-Luebering Glycolytic Shunt	7,69E-01	1,67E-01	NaN	PGAM1
GDP-mannose Biosynthesis	7,69E-01	1,67E-01	NaN	GPI
Renal Cell Carcinoma Signaling	7,62E-01	5,63E-02	NaN	CDC42,TGFB1,FH,RRAS
Chemokine Signaling	7,62E-01	5,63E-02	NaN	GNAI2,CFL1,PPP1CB,RRAS
IL-17 Signaling	7,47E-01	5,56E-02	NaN	MMP3,TIMP1,IL6,RRAS
Ephrin A Signaling	7,41E-01	6,25E-02	NaN	CDC42,CFL1,CFL2
p53 Signaling	7,4E-01	5,1E-02	NaN	CTNNB1,SERPINE2,BAX,THBS1,TP53I3
CXCR4 Signaling	7,31E-01	4,61E-02	NaN	GNAI2,GNB2L1,MYL12A,GNB1,GNG12,MYL9,RRAS
Telomerase Signaling	7,28E-01	5,05E-02	NaN	HSP90B1,PPP2R1A,HSP90AB1,HSP90AA1,RRAS
Antiproliferative Role of TOB in T Cell Signaling	7,24E-01	7,69E-02	NaN	TGFB1,TGFB2
Role of Pattern Recognition Receptors in Recognition of Bacteria and Viruses	7,21E-01	4,76E-02	NaN	C3,TGFB1,TGFB2,C5,IL6,PTX3
Acetyl-CoA Biosynthesis I (Pyruvate Dehydrogenase Complex)	7,08E-01	1,43E-01	NaN	DLD
Adenine and Adenosine Salvage III	7,08E-01	1,43E-01	NaN	HPRT1
Glycoaminoglycan-protein Linkage Region Biosynthesis	7,08E-01	1,43E-01	NaN	XYLT1
Heparan Sulfate Biosynthesis (Late Stages)	7,06E-01	6E-02	NaN	PRDX6,EXT1,EXT2
HER-2 Signaling in Breast Cancer	6,91E-01	5,26E-02	NaN	CDC42,MMP2,ITGB1,RRAS
Cellular Effects of Sildenafil (Viagra)	6,9E-01	4,65E-02	NaN	MYL12A,PPP1CB,PDIA3,MYL9,PRKACA,MYH9
VDR/RXR Activation	6,64E-01	5,13E-02	NaN	PSMC5,TGFB2,IGFBP3,IGFBP6
Dopamine Receptor Signaling	6,64E-01	5,13E-02	NaN	COMT,PPP2R1A,PPP1CB,PRKACA
RAR Activation	6,42E-01	4,21E-02	NaN	RPL7A,TGFB1,PSMC5,TGFB2,IGFBP3,PRKACA,MMP1,PRMT1
Relaxin Signaling	6,32E-01	4,44E-02	NaN	GNAI2,GNB2L1,GNB1,GNG12,PRKACA,APEX1
Oxidative Phosphorylation	6,16E-01	4,59E-02	NaN	ATP5O,ATP5A1,CYCS,MT-CO2,ATP5B
Sucrose Degradation V (Mammalian)	6,12E-01	1,11E-01	NaN	TPI1
GPCR-Mediated Nutrient Sensing in Enteroendocrine Cells	5,91E-01	4,76E-02	NaN	GNAI2,GNG12,PDIA3,PRKACA
Fatty Acid β-oxidation I	5,91E-01	6,25E-02	NaN	HSD17B10,ECHS1
Wnt/β-catenin Signaling	5,83E-01	4,14E-02	NaN	RUVBL2,CDH2,TGFB1,CTNNB1,PPP2R1A,TGFB2,LRP1
TR/RXR Activation	5,8E-01	4,71E-02	NaN	PFKP,COL6A3,FASN,ENO1
CREB Signaling in Neurons	5,67E-01	4,09E-02	NaN	GNAI2,GNB2L1,GNB1,GNG12,PDIA3,PRKACA,RRAS
Cell Cycle Regulation by BTG Family Proteins	5,36E-01	5,71E-02	NaN	PPP2R1A,PRMT1
IL-17A Signaling in Fibroblasts	5,36E-01	5,71E-02	NaN	IL6,MMP1
Dendritic Cell Maturation	5,23E-01	3,95E-02	NaN	TNFRSF11B,COL3A1,COL1A2,PDIA3,COL1A1,IL6,FSCN1
Stearate Biosynthesis I (Animals)	5,19E-01	5,56E-02	NaN	FASN,ACOT7
Calcium Signaling	5,16E-01	3,93E-02	NaN	TPM3,TPM4,MYL9,ATP2A2,PRKACA,TPM1,MYH9
Death Receptor Signaling	5,07E-01	4,35E-02	NaN	HSPB1,CYCS,LMNA,SPTAN1
Cleavage and Polyadenylation of Pre-mRNA	5,06E-01	8,33E-02	NaN	NUDT21
Glutaryl-CoA Degradation	5,06E-01	8,33E-02	NaN	HSD17B10
Acyl-CoA Hydrolysis	5,06E-01	8,33E-02	NaN	ACOT7
BER pathway	5,06E-01	8,33E-02	NaN	APEX1
Cell Cycle: G1/S Checkpoint Regulation	5,05E-01	4,69E-02	NaN	TGFB1,RPL11,TGFB2
Sperm Motility	5,05E-01	4,13E-02	NaN	PRDX6,TWF1,PDIA3,PRKACA,PTK7
Production of Nitric Oxide and Reactive Oxygen Species in Macrophages	5,03E-01	3,89E-02	NaN	TNFRSF11B,APOB,CLU,PPP2R1A,PPP1CB,APOE,ALB
SAPK/JNK Signaling	4,88E-01	4,26E-02	NaN	CDC42,HNRNPK,GNB1,RRAS
Noradrenaline and Adrenaline Degradation	4,88E-01	5,26E-02	NaN	HSD17B10,COMT
Guanosine Nucleotides Degradation III	4,78E-01	7,69E-02	NaN	NT5E
Regulation of the Epithelial-Mesenchymal Transition Pathway	4,76E-01	3,8E-02	NaN	LOX,CDH2,TGFB1,MMP2,CTNNB1,TGFB2,RRAS
GABA Receptor Signaling	4,72E-01	4,48E-02	NaN	AP2B1,AP2A1,AP1B1
IL-10 Signaling	4,61E-01	4,41E-02	NaN	BLVRB,IL6,BLVRA
GDNF Family Ligand-Receptor Interactions	4,61E-01	4,41E-02	NaN	CDC42,PDLIM7,RRAS
Thyroid Cancer Signaling	4,59E-01	5E-02	NaN	CTNNB1,RRAS
Neuroprotective Role of THOP1 in Alzheimer's Disease	4,59E-01	5E-02	NaN	PRKACA,YWHAE
Urate Biosynthesis/Inosine 5'-phosphate Degradation	4,52E-01	7,14E-02	NaN	NT5E
Role of MAPK Signaling in the Pathogenesis of Influenza	4,5E-01	4,35E-02	NaN	PRDX6,BAX,RRAS
Antioxidant Action of Vitamin C	4,44E-01	4,04E-02	NaN	PRDX6,GSTO1,TXNRD1,PDIA3
Melatonin Signaling	4,4E-01	4,29E-02	NaN	GNAI2,PDIA3,PRKACA
T Helper Cell Differentiation	4,3E-01	4,23E-02	NaN	TNFRSF11B,TGFB1,IL6
GPCR-Mediated Integration of Enteroendocrine Signaling Exemplified by an L Cell	4,3E-01	4,23E-02	NaN	GNAI2,PDIA3,PRKACA
Dopamine-DARPP32 Feedback in cAMP Signaling	4,3E-01	3,73E-02	NaN	GNAI2,PPP2R1A,PPP1CB,PDIA3,ATP2A2,PRKACA
nNOS Signaling in Skeletal Muscle Cells	4,28E-01	6,67E-02	NaN	DAG1
γ-glutamyl Cycle	4,28E-01	6,67E-02	NaN	ANPEP
Ovarian Cancer Signaling	4,28E-01	3,82E-02	NaN	MMP2,CTNNB1,PRKACA,RRAS,VEGFC
NF-κB Activation by Viruses	4,11E-01	4,11E-02	NaN	ITGAV,ITGB1,RRAS
Human Embryonic Stem Cell Pluripotency	4,07E-01	3,73E-02	NaN	INHBA,TGFB1,CTNNB1,BMP1,TGFB2
Role of IL-17F in Allergic Inflammatory Airway Diseases	4,07E-01	4,55E-02	NaN	MMP13,IL6
Granzyme B Signaling	4,07E-01	6,25E-02	NaN	CYCS
HGF Signaling	3,96E-01	3,81E-02	NaN	CDC42,ITGB1,IL6,RRAS
Pancreatic Adenocarcinoma Signaling	3,89E-01	3,77E-02	NaN	CDC42,TGFB1,TGFB2,VEGFC
γ-linolenate Biosynthesis II (Animals)	3,86E-01	5,88E-02	NaN	CYB5R3
Adenosine Nucleotides Degradation II	3,86E-01	5,88E-02	NaN	NT5E
BMP signaling pathway	3,84E-01	3,95E-02	NaN	BMP1,PRKACA,RRAS
Differential Regulation of Cytokine Production in Macrophages and T Helper Cells by IL-17A and IL-17F	3,68E-01	5,56E-02	NaN	IL6
Cyclins and Cell Cycle Regulation	3,67E-01	3,85E-02	NaN	TGFB1,PPP2R1A,TGFB2
Gαs Signaling	3,67E-01	3,67E-02	NaN	GNB2L1,GNB1,GNG12,PRKACA
Regulation of IL-2 Expression in Activated and Anergic T Lymphocytes	3,59E-01	3,8E-02	NaN	TGFB1,TGFB2,RRAS
Synaptic Long Term Depression	3,56E-01	3,52E-02	NaN	PRDX6,GNAI2,PPP2R1A,PDIA3,RRAS
Molecular Mechanisms of Cancer	3,54E-01	3,29E-02	NaN	GNAI2,CDC42,TGFB1,CTNNB1,ITGB1,BMP1,TGFB2,LRP1,BAX,PRKACA,CYCS,RRAS
Corticotropin Releasing Hormone Signaling	3,53E-01	3,6E-02	NaN	ARPC5,GNAI2,KRT1,PRKACA
TNFR1 Signaling	3,51E-01	4,08E-02	NaN	CDC42,CYCS
Purine Nucleotides Degradation II (Aerobic)	3,34E-01	5E-02	NaN	NT5E
Amyloid Processing	3,32E-01	3,92E-02	NaN	PRKACA,CAPNS1
Endometrial Cancer Signaling	3,22E-01	3,85E-02	NaN	CTNNB1,RRAS
Tryptophan Degradation III (Eukaryotic)	3,19E-01	4,76E-02	NaN	HSD17B10
Phototransduction Pathway	3,13E-01	3,77E-02	NaN	GNB1,PRKACA
PTEN Signaling	3,1E-01	3,39E-02	NaN	CDC42,ITGB1,YWHAH,RRAS
Maturity Onset Diabetes of Young (MODY) Signaling	3,05E-01	4,55E-02	NaN	GAPDH
Role of IL-17A in Arthritis	3,05E-01	3,7E-02	NaN	MMP13,MMP1
Synaptic Long Term Potentiation	3,04E-01	3,36E-02	NaN	PPP1CB,PDIA3,PRKACA,RRAS
Role of Cytokines in Mediating Communication between Immune Cells	2,96E-01	3,64E-02	NaN	TGFB1,IL6
UVA-Induced MAPK Signaling	2,94E-01	3,41E-02	NaN	PDIA3,CYCS,RRAS
Crosstalk between Dendritic Cells and Natural Killer Cells	2,88E-01	3,37E-02	NaN	TLN1,IL6,FSCN1
Triacylglycerol Degradation	2,79E-01	4,17E-02	NaN	PRDX6
Tec Kinase Signaling	2,77E-01	3,18E-02	NaN	GNAI2,GNB2L1,ITGB1,GNB1,GNG12
Phospholipases	2,72E-01	3,45E-02	NaN	PRDX6,PDIA3
Role of JAK family kinases in IL-6-type Cytokine Signaling	2,67E-01	4E-02	NaN	IL6
Chronic Myeloid Leukemia Signaling	2,63E-01	3,23E-02	NaN	TGFB1,TGFB2,RRAS
Salvage Pathways of Pyrimidine Ribonucleotides	2,63E-01	3,23E-02	NaN	CMPK1,NME1,AK1
NAD Salvage Pathway II	2,56E-01	3,85E-02	NaN	NT5E
Hepatic Cholestasis	2,55E-01	3,09E-02	NaN	TNFRSF11B,TGFB1,TGFB2,PRKACA,IL6
GNRH Signaling	2,52E-01	3,1E-02	NaN	GNAI2,CDC42,PRKACA,RRAS
Dopamine Degradation	2,45E-01	3,7E-02	NaN	COMT
GM-CSF Signaling	2,44E-01	3,23E-02	NaN	GNB2L1,RRAS
Activation of IRF by Cytosolic Pattern Recognition Receptors	2,37E-01	3,17E-02	NaN	PPIB,IL6
Estrogen-Dependent Breast Cancer Signaling	2,37E-01	3,17E-02	NaN	HSD17B10,RRAS
Role of p14/p19ARF in Tumor Suppression	2,17E-01	3,33E-02	NaN	NPM1
Sonic Hedgehog Signaling	2,17E-01	3,33E-02	NaN	PRKACA
Cytotoxic T Lymphocyte-mediated Apoptosis of Target Cells	2E-01	3,12E-02	NaN	CYCS

## Sheet: BM MSC IRH
© 2000-2016 QIAGEN. All rights reserved.
Ingenuity Canonical Pathways	-log(p-value)	Ratio	z-score	Molecules
EIF2 Signaling	1,88E01	1,89E-01	NaN	EIF2S1,EIF3M,RPS10,RPL13A,EIF3B,EIF3I,RPS20,RPL12,RPL8,RPS15A,EIF4A1,RPS3A,RPS21,RPS25,RPL11,RPS18,RPLP2,RPS7,EIF3L,RPS2,RPS12,RPS3,RPSA,RPS16,RPL7,RPLP0,RPS9,PPP1CB,EIF3H,RPS28,RPS4X,RRAS,RPL27,EIF3F,RPL10A
Remodeling of Epithelial Adherens Junctions	1,86E01	3,38E-01	NaN	IQGAP1,ACTR2,ARPC3,VCL,TUBB3,TUBB,CTNNB1,TUBB6,MAPRE1,ACTN1,TUBA1C,NME1,ARPC1B,ACTR3,TUBB4B,ARPC2,RAB5C,ARPC5,RAB7A,TUBA1A,ACTG1,TUBB2B,ACTN4
Protein Ubiquitination Pathway	1,58E01	1,45E-01	NaN	PSMB6,UBA1,PSMD3,PSMD7,HSPD1,PSMD6,PSMA3,PSMB5,USP5,PSME2,HSPE1,PSMB1,PSMA7,HSPA8,PSMA2,PSMD14,PSMB2,PSMD2,PSMA1,HSP90AA1,PSMA5,UBE2L3,PSMA4,USP14,HSP90B1,UBE2V1,PSMA6,UBE2N,HSPB1,HSPA4,PSMB4,UBE2I,HSPA5,PSMD13,HSPH1,HSP90AB1,PSMC6
Regulation of eIF4 and p70S6K Signaling	1,43E01	1,85E-01	NaN	EIF2S1,EIF3M,RPS10,PPP2R4,EIF3B,EIF3I,RPS20,ITGB1,RPS15A,EIF4A1,RPS3A,RPS21,RPS25,RPS18,RPS7,EIF3L,RPS2,RPS12,RPS3,RPSA,RPS16,RPS9,EIF3H,RPS28,RPS4X,RRAS,EIF3F
Epithelial Adherens Junction Signaling	1,34E01	1,78E-01	NaN	IQGAP1,CDH2,CDC42,ACTR2,VCL,TUBB3,TUBB6,TUBA1C,ARPC1B,MYH9,ARPC5,TUBA1A,ACTG1,ACTN4,ARPC3,TUBB,CTNNB1,TGFB2,ACTN1,MYL9,ACTR3,TUBB4B,ARPC2,TUBB2B,RRAS,RAC1
Actin Cytoskeleton Signaling	1,32E01	1,43E-01	NaN	IQGAP1,CDC42,ACTR2,VCL,ARPC1B,MYH9,ARPC5,FN1,CFL1,PFN1,ACTG1,ITGB1,ACTN4,TLN1,ARPC3,FLNA,EZR,MYL12A,MSN,ACTN1,MYL9,ACTR3,CFL2,RDX,ARPC2,GSN,PPP1CB,GNG12,PFN2,RRAS,RAC1
Hepatic Fibrosis / Hepatic Stellate Cell Activation	1,27E01	1,53E-01	NaN	IGFBP4,TGFB1,MMP2,COL6A1,COL1A1,MYH9,A2M,COL12A1,FN1,IGFBP3,VEGFC,COL4A1,COL6A3,COL3A1,TGFB2,COL1A2,IGFBP5,COL8A1,MYL9,COL6A2,COL5A1,TIMP2,COL5A2,COL4A2,TIMP1,SERPINE1,BAX,MMP1
RhoGDI Signaling	1,25E01	1,56E-01	NaN	CDH2,CDC42,ACTR2,GDI2,ARPC1B,ARPC5,GNAQ,GNAI2,CFL1,ACTG1,ITGB1,ARHGDIA,CDH11,ARPC3,GNB2L1,EZR,MYL12A,MSN,ARHGAP1,MYL9,ACTR3,CD44,CFL2,RDX,ARPC2,GNG12,RAC1
mTOR Signaling	1,16E01	1,44E-01	NaN	EIF3M,RPS10,PPP2R4,EIF3B,EIF3I,RPS20,RPS15A,EIF4A1,RPS3A,RPS21,VEGFC,RPS25,RPS18,RPS7,EIF3L,RPS2,RPS12,RPS3,RPSA,RPS16,RPS9,EIF3H,RPS28,RPS4X,RRAS,RAC1,EIF3F
Germ Cell-Sertoli Cell Junction Signaling	1,08E01	1,5E-01	NaN	IQGAP1,CDH2,CDC42,TGFB1,VCL,TUBB3,TUBB,CTNNB1,TUBB6,TGFB2,ACTN1,TUBA1C,TUBB4B,CFL2,A2M,TUBA1A,CFL1,ACTG1,GSN,ITGB1,TUBB2B,ACTN4,RRAS,RAC1
RhoA Signaling	1,07E01	1,72E-01	NaN	ACTR2,ARPC3,EZR,MYL12A,MSN,ARHGAP1,MYL9,ARPC1B,ACTR3,SEPT2,RDX,CFL2,ARPC2,ARPC5,CFL1,PFN1,ACTG1,SEPT11,SEPT9,PPP1CB,PFN2
Signaling by Rho Family GTPases	1,01E01	1,2E-01	NaN	IQGAP1,CDH2,CDC42,ACTR2,ARPC1B,VIM,ARPC5,GNAQ,GNAI2,CFL1,ACTG1,SEPT11,ITGB1,CDH11,ARPC3,GNB2L1,EZR,MYL12A,MSN,MYL9,ACTR3,SEPT2,CFL2,RDX,ARPC2,SEPT9,GNG12,RAC1
Axonal Guidance Signaling	9,34E00	8,76E-02	NaN	CXCL12,CDC42,ACTR2,MMP2,TUBB3,PAPPA,TUBB6,TUBA1C,ARPC1B,ARPC5,GNAQ,GNAI2,TUBA1A,CFL1,PFN1,COPS5,ITGB1,SEMA7A,PSMD14,VEGFC,ARPC3,GNB2L1,TUBB,MYL12A,DPYSL2,MYL9,ACTR3,RTN4,CFL2,TUBB4B,ARPC2,BMP1,TUBB2B,GNG12,PDIA3,PFN2,RRAS,RAC1
Regulation of Actin-based Motility by Rho	9,33E00	1,87E-01	NaN	CDC42,ACTR2,ARPC3,MYL12A,MYL9,ARPC1B,ACTR3,ARPC2,ARPC5,CFL1,PFN1,GSN,ITGB1,ARHGDIA,PPP1CB,RAC1,PFN2
Caveolar-mediated Endocytosis Signaling	9,09E00	2,11E-01	NaN	FLNB,COPB2,FLNA,PTRF,COPG1,RAB5C,ACTG1,COPA,ITGB1,COPE,COPB1,FLNC,COPZ1,ARCN1,ALB
Clathrin-mediated Endocytosis Signaling	7,99E00	1,19E-01	NaN	CDC42,ACTR2,ARPC3,CLTC,ARPC1B,ACTR3,ARPC2,RAB5C,ARPC5,RAB7A,APOB,ACTG1,HSPA8,CLU,ITGB1,APOE,AP2M1,RAB11B,RAC1,VEGFC,TFRC,ALB
Glycolysis I	7,9E00	3,6E-01	NaN	PFKP,TPI1,PGAM1,PGK1,PKM,GAPDH,ALDOA,ENO1,GPI
Gluconeogenesis I	7,9E00	3,6E-01	NaN	PGAM1,PGK1,ME1,GAPDH,ALDOA,MDH2,ENO1,MDH1,GPI
14-3-3-mediated Signaling	7,61E00	1,45E-01	NaN	YWHAQ,YWHAG,TUBB3,TUBB,TUBB6,TUBA1C,YWHAE,YWHAH,TUBB4B,VIM,TUBA1A,TUBB2B,PDIA3,BAX,YWHAZ,YWHAB,RRAS
Leukocyte Extravasation Signaling	7,45E00	1,11E-01	NaN	CXCL12,CDC42,MMP2,VCL,CTNNB1,EZR,MSN,ARHGAP1,ACTN1,EDIL3,CD44,RDX,TIMP2,MMP3,GNAI2,ACTG1,ITGB1,TIMP1,ACTN4,RAC1,MMP1,MMP14
Inhibition of Matrix Metalloproteases	7,11E00	2,56E-01	NaN	A2M,MMP3,MMP2,THBS2,HSPG2,LRP1,TIMP1,MMP1,TIMP2,MMP14
Ephrin Receptor Signaling	7,07E00	1,15E-01	NaN	CXCL12,CDC42,ACTR2,ARPC3,GNB2L1,ARPC1B,ACTR3,CFL2,ARPC2,ARPC5,GNAQ,GNAI2,CFL1,ACP1,ITGB1,GNG12,ANGPT1,RRAS,RAC1,VEGFC
Ephrin B Signaling	7,02E00	1,78E-01	NaN	CXCL12,CDC42,GNB2L1,CTNNB1,HNRNPK,CAP1,CFL2,GNAI2,GNAQ,CFL1,ACP1,GNG12,RAC1
Complement System	6,24E00	2,43E-01	NaN	C4A/C4B,C3,CFI,C7,C5,C9,C1S,SERPING1,CFH
Integrin Signaling	6,05E00	9,95E-02	NaN	CDC42,ACTR2,TLN1,ARPC3,VCL,MYL12A,MYL9,ACTN1,ARPC1B,ACTR3,ARPC2,ARF1,ARPC5,ACTG1,ITGB1,ARF4,PPP1CB,ACTN4,RRAS,RAC1
Rac Signaling	5,96E00	1,35E-01	NaN	IQGAP1,CDC42,ACTR2,ARPC3,ARPC1B,ACTR3,CD44,CFL2,ARPC2,ARPC5,CFL1,ITGB1,RRAS,RAC1
ILK Signaling	5,95E00	1,02E-01	NaN	FLNB,CDC42,VCL,FLNA,RSU1,CTNNB1,PPP2R4,MYL9,ACTN1,CFL2,MYH9,VIM,FN1,CFL1,ACTG1,ITGB1,FLNC,ACTN4,VEGFC
phagosome maturation	5,92E00	1,25E-01	NaN	DYNC1H1,TUBB3,TUBB,TUBB6,TUBA1C,PRDX1,TUBB4B,PRDX6,RAB5C,RAB7A,TUBA1A,PRDX5,TUBB2B,CANX,PRDX2
Sertoli Cell-Sertoli Cell Junction Signaling	5,61E00	1,01E-01	NaN	CDC42,VCL,TUBB3,TUBB,CTNNB1,TUBB6,ACTN1,TUBA1C,TUBB4B,A2M,TUBA1A,ACTG1,ITGB1,TUBB2B,ACTN4,RRAS,RAC1,SPTAN1
IGF-1 Signaling	5,55E00	1,34E-01	NaN	IGFBP4,YWHAQ,YWHAG,IGFBP2,IGFBP5,YWHAE,YWHAH,IGFBP7,IGFBP3,YWHAZ,RRAS,YWHAB,IGFBP6
Actin Nucleation by ARP-WASP Complex	5,55E00	1,79E-01	NaN	ARPC2,ARPC5,CDC42,ACTR2,ARPC3,ITGB1,ACTR3,ARPC1B,RRAS,RAC1
PI3K/AKT Signaling	5,08E00	1,14E-01	NaN	YWHAQ,YWHAG,CTNNB1,HSP90B1,PPP2R4,CDC37,YWHAE,YWHAH,ITGB1,HSP90AB1,YWHAZ,HSP90AA1,RRAS,YWHAB
Fcγ Receptor-mediated Phagocytosis in Macrophages and Monocytes	5E00	1,29E-01	NaN	ARPC2,ARPC5,CDC42,ACTR2,ARPC3,TLN1,ACTG1,EZR,RAB11B,ACTR3,ARPC1B,RAC1
Hypoxia Signaling in the Cardiovascular System	4,94E00	1,54E-01	NaN	UBE2L3,COPS5,UBE2I,HSP90B1,UBE2V1,LDHA,UBE2N,HSP90AB1,HSP90AA1,P4HB
Acute Phase Response Signaling	4,69E00	9,47E-02	NaN	C3,SERPINF1,HNRNPK,C5,A2M,C4A/C4B,FN1,C9,SERPINE1,C1S,AHSG,SERPING1,RRAS,ITIH2,SERPIND1,ALB
Myc Mediated Apoptosis Signaling	4,54E00	1,55E-01	NaN	YWHAQ,YWHAG,BAX,CYCS,YWHAE,YWHAZ,YWHAH,YWHAB,RRAS
LXR/RXR Activation	4,49E00	1,07E-01	NaN	C3,SERPINF1,FASN,HADH,C4A/C4B,APOB,VTN,CLU,APOE,C9,AHSG,ECHS1,ALB
Virus Entry via Endocytic Pathways	4,45E00	1,24E-01	NaN	FLNB,CDC42,ACTG1,FLNA,ITGB1,CLTC,FLNC,AP2M1,RRAS,RAC1,TFRC
Coagulation System	4,38E00	2E-01	NaN	A2M,SERPINA5,PLAU,SERPINE1,F5,SERPINC1,SERPIND1
fMLP Signaling in Neutrophils	4,34E00	1,11E-01	NaN	ARPC2,ARPC5,GNAI2,CDC42,ACTR2,ARPC3,GNB2L1,GNG12,ACTR3,ARPC1B,RRAS,RAC1
Breast Cancer Regulation by Stathmin1	4,05E00	8,38E-02	NaN	CDC42,TUBB3,GNB2L1,TUBB,TUBB6,PPP2R4,TUBA1C,TUBB4B,GNAQ,GNAI2,TUBA1A,TUBB2B,PPP1CB,GNG12,RRAS,RAC1
Semaphorin Signaling in Neurons	4,01E00	1,51E-01	NaN	CFL1,ITGB1,DPYSL3,SEMA7A,ARHGAP1,DPYSL2,RAC1,CFL2
Unfolded protein response	3,95E00	1,48E-01	NaN	HSPA4,HSPA8,HSP90B1,HSPA5,CANX,HSPH1,VCP,P4HB
p70S6K Signaling	3,93E00	1,01E-01	NaN	GNAI2,YWHAQ,GNAQ,YWHAG,PPP2R4,PDIA3,YWHAE,YWHAZ,YWHAH,EEF2,YWHAB,RRAS
Pentose Phosphate Pathway	3,78E00	3,64E-01	NaN	TKT,PGD,G6PD,TALDO1
Atherosclerosis Signaling	3,76E00	9,68E-02	NaN	PRDX6,CXCL12,MMP3,APOB,TGFB1,CLU,COL3A1,COL1A2,APOE,COL1A1,MMP1,ALB
Cdc42 Signaling	3,62E00	8,38E-02	NaN	IQGAP1,CDC42,ACTR2,ARPC3,MYL12A,MYL9,ACTR3,ARPC1B,CFL2,ARPC2,ARPC5,CFL1,ITGB1,PPP1CB
Agranulocyte Adhesion and Diapedesis	3,57E00	7,94E-02	NaN	CXCL12,MMP2,EZR,MSN,C5,MYL9,RDX,MYH9,MMP3,GNAI2,FN1,ACTG1,ITGB1,MMP1,MMP14
ERK5 Signaling	3,47E00	1,27E-01	NaN	YWHAQ,GNAQ,YWHAG,YWHAE,YWHAZ,YWHAH,YWHAB,RRAS
Gap Junction Signaling	3,4E00	8,39E-02	NaN	TUBB3,CTNNB1,TUBB,TUBB6,TUBA1C,TUBB4B,GNAI2,TUBA1A,GNAQ,ACTG1,TUBB2B,PDIA3,RRAS
Paxillin Signaling	3,3E00	9,9E-02	NaN	ARF1,CDC42,TLN1,VCL,ACTG1,ITGB1,ACTN1,ACTN4,RRAS,RAC1
NRF2-mediated Oxidative Stress Response	3,29E00	7,78E-02	NaN	USP14,CBR1,ERP29,TXNRD1,PPIB,PRDX1,GSTO1,CCT7,ACTG1,GSR,AKR1A1,VCP,GSTP1,RRAS
Protein Kinase A Signaling	3,28E00	5,96E-02	NaN	FLNB,YWHAQ,YWHAG,TGFB1,GNB2L1,FLNA,CTNNB1,MYL12A,TGFB2,MYL9,YWHAE,YWHAH,GNAQ,GNAI2,PTPRK,PYGB,ACP1,PPP1CB,GNG12,PDIA3,FLNC,YWHAZ,YWHAB
HIF1α Signaling	3,27E00	9,8E-02	NaN	MMP3,COPS5,MMP2,LDHA,HSP90AA1,RRAS,VEGFC,MMP1,MMP14,LDHB
Telomere Extension by Telomerase	3,2E00	2,67E-01	NaN	HNRNPA1,XRCC6,XRCC5,HNRNPA2B1
HIPPO signaling	3,2E00	1,05E-01	NaN	YWHAQ,YWHAG,PPP2R4,PPP1CB,YWHAE,YWHAZ,YWHAH,YWHAB,CD44
GDP-glucose Biosynthesis	3,16E00	4,29E-01	NaN	PGM1,PGM3,HK1
Glucocorticoid Receptor Signaling	3,14E00	6,55E-02	NaN	TGFB1,PLAU,HSP90B1,TGFB2,YWHAH,ANXA1,A2M,HSPA4,HMGB1,HSPA8,UBE2I,HSPA5,SERPINE1,HSP90AB1,HSP90AA1,RRAS,RAC1,MMP1
Tight Junction Signaling	3,09E00	7,78E-02	NaN	CDC42,TGFB1,VCL,CTNNB1,PPP2R4,TGFB2,MYL9,MYH9,RAB13,ACTG1,RAC1,NUDT21,SPTAN1
FXR/RXR Activation	3,08E00	8,66E-02	NaN	C4A/C4B,APOB,VTN,C3,SERPINF1,CLU,FASN,APOE,C9,AHSG,ALB
Glioma Invasiveness Signaling	3,01E00	1,23E-01	NaN	VTN,MMP2,PLAU,TIMP1,RRAS,CD44,TIMP2
Regulation of Cellular Mechanics by Calpain Protease	3,01E00	1,23E-01	NaN	TLN1,VCL,ITGB1,EZR,ACTN1,ACTN4,RRAS
Role of Tissue Factor in Cancer	3,01E00	9,09E-02	NaN	CDC42,GNAQ,CFL1,ITGB1,RRAS,RAC1,VEGFC,MMP1,CFL2,P4HB
Mitochondrial Dysfunction	3E00	7,6E-02	NaN	VDAC1,PARK7,ATP5F1,CYCS,PRDX3,CYB5R3,PRDX5,GSR,GPX7,ATP5A1,MT-CO2,ATP5C1,ATP5B
RAN Signaling	2,98E00	2,35E-01	NaN	IPO5,RAN,KPNB1,TNPO1
Glucose and Glucose-1-phosphate Degradation	2,97E00	3,75E-01	NaN	PGM1,PGM3,HK1
Intrinsic Prothrombin Activation Pathway	2,96E00	1,72E-01	NaN	COL3A1,COL1A2,COL1A1,F5,SERPINC1
Aldosterone Signaling in Epithelial Cells	2,95E00	7,89E-02	NaN	HSPB1,HSPA4,HSPA8,HSP90B1,HSPA5,HSPD1,PDIA3,HSPH1,HSP90AB1,HSP90AA1,HSPE1,AHCY
UDP-N-acetyl-D-galactosamine Biosynthesis II	2,8E00	3,33E-01	NaN	PGM3,HK1,GPI
Aryl Hydrocarbon Receptor Signaling	2,73E00	7,86E-02	NaN	HSPB1,GSTO1,TGFB1,HSP90B1,TGFB2,BAX,HSP90AB1,GSTP1,CTSD,HSP90AA1,TGM2
Glycogen Degradation II	2,66E00	3E-01	NaN	PGM1,PYGB,PGM3
Cell Cycle: G2/M DNA Damage Checkpoint Regulation	2,65E00	1,22E-01	NaN	YWHAQ,YWHAG,YWHAE,YWHAZ,YWHAH,YWHAB
Inosine-5'-phosphate Biosynthesis II	2,65E00	6,67E-01	NaN	PAICS,ATIC
Oncostatin M Signaling	2,64E00	1,47E-01	NaN	MMP3,CHI3L1,PLAU,RRAS,MMP1
Agrin Interactions at Neuromuscular Junction	2,53E00	1,01E-01	NaN	CDC42,ACTG1,ITGB1,LAMC1,DAG1,RRAS,RAC1
PAK Signaling	2,48E00	8,99E-02	NaN	CDC42,CFL1,ITGB1,MYL12A,MYL9,RRAS,RAC1,CFL2
Glycogen Degradation III	2,41E00	2,5E-01	NaN	PGM1,PYGB,PGM3
Granulocyte Adhesion and Diapedesis	2,4E00	6,78E-02	NaN	HSPB1,CXCL12,GNAI2,MMP3,MMP2,ITGB1,EZR,MSN,C5,MMP1,RDX,MMP14
VEGF Signaling	2,39E00	8,7E-02	NaN	EIF2S1,VCL,ACTG1,ACTN1,ACTN4,YWHAE,RRAS,VEGFC
tRNA Charging	2,37E00	1,28E-01	NaN	GARS,EPRS,TARS,HARS,WARS
Heme Degradation	2,35E00	5E-01	NaN	BLVRB,BLVRA
Glutathione Redox Reactions II	2,35E00	5E-01	NaN	GSR,PDIA3
Huntington's Disease Signaling	2,31E00	6,11E-02	NaN	GNB2L1,PENK,CLTC,CYCS,PSME2,GNAQ,HSPA4,HSPA8,HSPA5,GNG12,BAX,CTSD,ATP5B,TGM2
IL-8 Signaling	2,27E00	6,52E-02	NaN	IQGAP1,GNAI2,MMP2,GNB2L1,GNG12,MYL9,ANGPT1,BAX,LASP1,RRAS,RAC1,VEGFC
ERK/MAPK Signaling	2,21E00	6,42E-02	NaN	HSPB1,YWHAQ,YWHAG,TLN1,ITGB1,PPP2R4,PPP1CB,YWHAZ,YWHAH,YWHAB,RRAS,RAC1
Colorectal Cancer Metastasis Signaling	2,19E00	5,93E-02	NaN	MMP2,TGFB1,GNB2L1,CTNNB1,TGFB2,MMP3,GNG12,LRP1,BAX,RRAS,RAC1,VEGFC,MMP1,MMP14
Pentose Phosphate Pathway (Oxidative Branch)	2,14E00	4E-01	NaN	PGD,G6PD
Chondroitin Sulfate Degradation (Metazoa)	2,12E00	2E-01	NaN	HEXB,CEMIP,CD44
Dermatan Sulfate Degradation (Metazoa)	2,04E00	1,88E-01	NaN	HEXB,CEMIP,CD44
Pyrimidine Ribonucleotides De Novo Biosynthesis	1,99E00	1,29E-01	NaN	CAD,CMPK1,NME1,AK1
Bladder Cancer Signaling	1,98E00	8,05E-02	NaN	MMP3,MMP2,THBS1,RRAS,VEGFC,MMP1,MMP14
Pyruvate Fermentation to Lactate	1,97E00	3,33E-01	NaN	LDHA,LDHB
Pentose Phosphate Pathway (Non-oxidative Branch)	1,97E00	3,33E-01	NaN	TKT,TALDO1
UDP-N-acetyl-D-glucosamine Biosynthesis II	1,97E00	3,33E-01	NaN	GFPT1,PGM3
Chemokine Signaling	1,86E00	8,45E-02	NaN	CXCL12,GNAI2,GNAQ,CFL1,PPP1CB,RRAS
Aspartate Degradation II	1,83E00	2,86E-01	NaN	MDH2,MDH1
Glutathione Redox Reactions I	1,83E00	1,58E-01	NaN	PRDX6,GSR,GPX7
CCR3 Signaling in Eosinophils	1,79E00	6,84E-02	NaN	GNAI2,CFL1,GNB2L1,PPP1CB,GNG12,RRAS,RAC1,CFL2
CD28 Signaling in T Helper Cells	1,77E00	6,78E-02	NaN	ARPC2,ARPC5,CDC42,ACTR2,ARPC3,ACTR3,ARPC1B,RAC1
Antigen Presentation Pathway	1,73E00	1,08E-01	NaN	PSMB6,PDIA3,CANX,PSMB5
Airway Pathology in Chronic Obstructive Pulmonary Disease	1,72E00	2,5E-01	NaN	MMP2,MMP1
Endoplasmic Reticulum Stress Pathway	1,71E00	1,43E-01	NaN	EIF2S1,HSP90B1,HSPA5
Pyrimidine Deoxyribonucleotides De Novo Biosynthesis I	1,66E00	1,36E-01	NaN	CMPK1,NME1,AK1
Sucrose Degradation V (Mammalian)	1,61E00	2,22E-01	NaN	TPI1,ALDOA
CXCR4 Signaling	1,58E00	5,92E-02	NaN	CXCL12,GNAI2,GNAQ,GNB2L1,MYL12A,GNG12,MYL9,RRAS,RAC1
Prostate Cancer Signaling	1,58E00	7,32E-02	NaN	CTNNB1,HSP90B1,HSP90AB1,GSTP1,HSP90AA1,RRAS
Acetyl-CoA Biosynthesis III (from Citrate)	1,56E00	1E00	NaN	ACLY
PPARα/RXRα Activation	1,55E00	5,59E-02	NaN	GNAQ,TGFB1,HSP90B1,FASN,TGFB2,PDIA3,CAND1,HSP90AB1,HSP90AA1,RRAS
PCP pathway	1,52E00	7,94E-02	NaN	HSPB1,PFN1,CTHRC1,RAC1,PFN2
α-Adrenergic Signaling	1,47E00	6,9E-02	NaN	GNAI2,GNAQ,PYGB,GNB2L1,GNG12,RRAS
FAK Signaling	1,47E00	6,9E-02	NaN	TLN1,VCL,ACTG1,ITGB1,RRAS,RAC1
TGF-β Signaling	1,47E00	6,9E-02	NaN	INHBA,CDC42,TGFB1,TGFB2,SERPINE1,RRAS
Lipid Antigen Presentation by CD1	1,46E00	1,15E-01	NaN	PDIA3,CANX,AP2M1
Neuregulin Signaling	1,45E00	6,82E-02	NaN	ITGB1,HSP90B1,DCN,HSP90AB1,HSP90AA1,RRAS
G Beta Gamma Signaling	1,45E00	6,82E-02	NaN	GNAI2,CDC42,GNAQ,GNB2L1,GNG12,RRAS
Purine Nucleotides De Novo Biosynthesis II	1,45E00	1,82E-01	NaN	PAICS,ATIC
Mitotic Roles of Polo-Like Kinase	1,44E00	7,58E-02	NaN	TGFB1,HSP90B1,PPP2R4,HSP90AB1,HSP90AA1
Macropinocytosis Signaling	1,39E00	7,35E-02	NaN	CDC42,ITGB1,ACTN4,RRAS,RAC1
Ephrin A Signaling	1,36E00	8,33E-02	NaN	CDC42,CFL1,RAC1,CFL2
Gα12/13 Signaling	1,35E00	5,98E-02	NaN	CDH2,CDC42,CTNNB1,MYL12A,MYL9,CDH11,RRAS
eNOS Signaling	1,35E00	5,63E-02	NaN	HSPA4,GNAQ,HSPA8,HSP90B1,HSPA5,HSP90AB1,HSP90AA1,VEGFC
Glutathione-mediated Detoxification	1,34E00	1,03E-01	NaN	GSTO1,ANPEP,GSTP1
Pyrimidine Ribonucleotides Interconversion	1,34E00	1,03E-01	NaN	CMPK1,NME1,AK1
Cardiac Hypertrophy Signaling	1,32E00	4,93E-02	NaN	HSPB1,GNAI2,GNAQ,TGFB1,GNB2L1,MYL12A,TGFB2,GNG12,PDIA3,MYL9,RRAS
HMGB1 Signaling	1,3E00	5,83E-02	NaN	CDC42,HMGB1,TGFB1,TGFB2,SERPINE1,RRAS,RAC1
UDP-D-xylose and UDP-D-glucuronate Biosynthesis	1,26E00	5E-01	NaN	UGDH
Palmitate Biosynthesis I (Animals)	1,26E00	5E-01	NaN	FASN
Uridine-5'-phosphate Biosynthesis	1,26E00	5E-01	NaN	CAD
Fatty Acid Biosynthesis Initiation II	1,26E00	5E-01	NaN	FASN
Amyotrophic Lateral Sclerosis Signaling	1,26E00	6,12E-02	NaN	RAB5C,BAX,CYCS,SSR4,RAC1,VEGFC
DNA Double-Strand Break Repair by Non-Homologous End Joining	1,25E00	1,43E-01	NaN	XRCC6,XRCC5
Colanic Acid Building Blocks Biosynthesis	1,25E00	1,43E-01	NaN	GPI,UGDH
G Protein Signaling Mediated by Tubby	1,2E00	9,09E-02	NaN	GNAQ,GNB2L1,GNG12
Vitamin-C Transport	1,2E00	1,33E-01	NaN	GSTO1,TXNRD1
Phospholipase C Signaling	1,17E00	4,64E-02	NaN	GNAQ,GNB2L1,ITGB1,MYL12A,PPP1CB,GNG12,MYL9,RRAS,RAC1,TGM2,MARCKS
Inhibition of Angiogenesis by TSP1	1,17E00	8,82E-02	NaN	TGFB1,HSPG2,THBS1
Role of Macrophages, Fibroblasts and Endothelial Cells in Rheumatoid Arthritis	1,15E00	4,39E-02	NaN	CXCL12,TGFB1,CTNNB1,C5,MMP3,GNAQ,FN1,PDIA3,LRP1,RRAS,RAC1,VEGFC,MMP1
Granzyme B Signaling	1,15E00	1,25E-01	NaN	CYCS,LMNB2
Extrinsic Prothrombin Activation Pathway	1,15E00	1,25E-01	NaN	F5,SERPINC1
Methylglyoxal Degradation III	1,15E00	1,25E-01	NaN	AKR1B1,AKR1A1
Parkinson's Signaling	1,15E00	1,25E-01	NaN	PARK7,CYCS
Heparan Sulfate Biosynthesis	1,13E00	7,02E-02	NaN	PRDX6,EXT1,EXT2,XYLT1
Methionine Degradation I (to Homocysteine)	1,1E00	1,18E-01	NaN	AHCY,PRMT1
IL-12 Signaling and Production in Macrophages	1,1E00	5,22E-02	NaN	RAB7A,APOB,TGFB1,CLU,TGFB2,APOE,ALB
Diphthamide Biosynthesis	1,09E00	3,33E-01	NaN	EEF2
Trehalose Degradation II (Trehalase)	1,09E00	3,33E-01	NaN	HK1
NADH Repair	1,09E00	3,33E-01	NaN	GAPDH
Methylglyoxal Degradation I	1,09E00	3,33E-01	NaN	GLO1
D-glucuronate Degradation I	1,09E00	3,33E-01	NaN	AKR1A1
Thyroid Hormone Biosynthesis	1,09E00	3,33E-01	NaN	CTSD
Oxidative Phosphorylation	1,08E00	5,5E-02	NaN	ATP5F1,ATP5A1,CYCS,MT-CO2,ATP5C1,ATP5B
phagosome formation	1,08E00	5,5E-02	NaN	FN1,VTN,ITGB1,MRC2,PDIA3,MARCKS
Induction of Apoptosis by HIV1	1,07E00	6,67E-02	NaN	SLC25A5,SLC25A6,BAX,CYCS
Role of Osteoblasts, Osteoclasts and Chondrocytes in Rheumatoid Arthritis	1,07E00	4,57E-02	NaN	MMP3,TGFB1,CTNNB1,GSN,ITGB1,BMP1,LRP1,COL1A1,MMP1,MMP14
Thrombin Signaling	1,07E00	4,71E-02	NaN	GNAI2,GNAQ,GNB2L1,MYL12A,PPP1CB,GNG12,PDIA3,MYL9,RRAS
TR/RXR Activation	1,06E00	5,88E-02	NaN	PFKP,COL6A3,FASN,ME1,ENO1
Androgen Signaling	1,05E00	5,41E-02	NaN	GNAI2,HSPA4,GNAQ,GNB2L1,GNG12,HSP90AA1
Docosahexaenoic Acid (DHA) Signaling	1,03E00	7,69E-02	NaN	SERPINF1,BAX,CYCS
Cysteine Biosynthesis III (mammalia)	1,02E00	1,05E-01	NaN	AHCY,PRMT1
Wnt/β-catenin Signaling	1E00	4,73E-02	NaN	CDH2,GNAQ,TGFB1,CTNNB1,PPP2R4,TGFB2,LRP1,CD44
Apoptosis Signaling	9,93E-01	5,62E-02	NaN	BAX,CYCS,RRAS,LMNA,SPTAN1
Arsenate Detoxification I (Glutaredoxin)	9,73E-01	2,5E-01	NaN	GSTO1
Uracil Degradation II (Reductive)	9,73E-01	2,5E-01	NaN	DPYSL2
Ascorbate Recycling (Cytosolic)	9,73E-01	2,5E-01	NaN	GSTO1
Thymine Degradation	9,73E-01	2,5E-01	NaN	DPYSL2
Factors Promoting Cardiogenesis in Vertebrates	9,48E-01	5,43E-02	NaN	TGFB1,CTNNB1,BMP1,TGFB2,LRP1
Death Receptor Signaling	9,48E-01	5,43E-02	NaN	HSPB1,ACTG1,CYCS,LMNA,SPTAN1
P2Y Purigenic Receptor Signaling Pathway	9,44E-01	5,04E-02	NaN	GNAI2,GNAQ,GNB2L1,GNG12,PDIA3,RRAS
Polyamine Regulation in Colon Cancer	9,09E-01	9,09E-02	NaN	CTNNB1,PSME2
Role of NFAT in Cardiac Hypertrophy	8,99E-01	4,47E-02	NaN	GNAI2,GNAQ,TGFB1,GNB2L1,TGFB2,GNG12,PDIA3,RRAS
Serine Biosynthesis	8,82E-01	2E-01	NaN	PSAT1
TCA Cycle II (Eukaryotic)	8,77E-01	8,7E-02	NaN	MDH2,MDH1
Renal Cell Carcinoma Signaling	8,71E-01	5,63E-02	NaN	CDC42,TGFB1,RRAS,RAC1
p53 Signaling	8,64E-01	5,1E-02	NaN	CTNNB1,SERPINE2,BAX,THBS1,TP53I3
Role of Pattern Recognition Receptors in Recognition of Bacteria and Viruses	8,59E-01	4,76E-02	NaN	EIF2S1,C3,TGFB1,TGFB2,C5,PTX3
CDK5 Signaling	8,51E-01	5,05E-02	NaN	ITGB1,PPP2R4,LAMC1,PPP1CB,RRAS
Telomerase Signaling	8,51E-01	5,05E-02	NaN	HSP90B1,PPP2R4,HSP90AB1,HSP90AA1,RRAS
Tumoricidal Function of Hepatic Natural Killer Cells	8,47E-01	8,33E-02	NaN	BAX,CYCS
Cellular Effects of Sildenafil (Viagra)	8,25E-01	4,65E-02	NaN	ACTG1,MYL12A,PPP1CB,PDIA3,MYL9,MYH9
Thioredoxin Pathway	8,09E-01	1,67E-01	NaN	TXNRD1
Glycogen Biosynthesis II (from UDP-D-Glucose)	8,09E-01	1,67E-01	NaN	GBE1
Rapoport-Luebering Glycolytic Shunt	8,09E-01	1,67E-01	NaN	PGAM1
GDP-mannose Biosynthesis	8,09E-01	1,67E-01	NaN	GPI
HER-2 Signaling in Breast Cancer	7,95E-01	5,26E-02	NaN	CDC42,MMP2,ITGB1,RRAS
Heparan Sulfate Biosynthesis (Late Stages)	7,93E-01	6E-02	NaN	PRDX6,EXT1,EXT2
Antiproliferative Role of TOB in T Cell Signaling	7,91E-01	7,69E-02	NaN	TGFB1,TGFB2
NAD Salvage Pathway II	7,91E-01	7,69E-02	NaN	ACP1,NT5E
VDR/RXR Activation	7,67E-01	5,13E-02	NaN	TGFB2,IGFBP3,IGFBP5,IGFBP6
IL-15 Production	7,65E-01	7,41E-02	NaN	TWF1,PTK7
Pancreatic Adenocarcinoma Signaling	7,64E-01	4,72E-02	NaN	CDC42,TGFB1,TGFB2,RAC1,VEGFC
Reelin Signaling in Neurons	7,53E-01	5,06E-02	NaN	PAFAH1B2,PAFAH1B1,ITGB1,APOE
Regulation of IL-2 Expression in Activated and Anergic T Lymphocytes	7,53E-01	5,06E-02	NaN	TGFB1,TGFB2,RRAS,RAC1
Superpathway of Serine and Glycine Biosynthesis I	7,48E-01	1,43E-01	NaN	PSAT1
Glycoaminoglycan-protein Linkage Region Biosynthesis	7,48E-01	1,43E-01	NaN	XYLT1
Ceramide Signaling	7,4E-01	5E-02	NaN	PPP2R4,CYCS,CTSD,RRAS
Histidine Degradation III	6,95E-01	1,25E-01	NaN	HAL
Superoxide Radicals Degradation	6,95E-01	1,25E-01	NaN	GPX7
Role of p14/p19ARF in Tumor Suppression	6,95E-01	6,67E-02	NaN	NPM1,RAC1
Synaptic Long Term Depression	6,93E-01	4,23E-02	NaN	PRDX6,GNAI2,GNAQ,PPP2R4,PDIA3,RRAS
GPCR-Mediated Nutrient Sensing in Enteroendocrine Cells	6,89E-01	4,76E-02	NaN	GNAI2,GNAQ,GNG12,PDIA3
Molecular Mechanisms of Cancer	6,64E-01	3,56E-02	NaN	CDC42,TGFB1,CTNNB1,TGFB2,CYCS,GNAI2,GNAQ,ITGB1,BMP1,LRP1,BAX,RRAS,RAC1
Fatty Acid β-oxidation I	6,53E-01	6,25E-02	NaN	HADH,ECHS1
Superpathway of Methionine Degradation	6,53E-01	6,25E-02	NaN	AHCY,PRMT1
AMPK Signaling	6,38E-01	3,91E-02	NaN	PFKP,CAB39,PPP2R4,FASN,EEF2,AK2,AK1
PTEN Signaling	6,37E-01	4,24E-02	NaN	CDC42,ITGB1,YWHAH,RRAS,RAC1
Production of Nitric Oxide and Reactive Oxygen Species in Macrophages	6,3E-01	3,89E-02	NaN	APOB,CLU,PPP2R4,PPP1CB,APOE,RAC1,ALB
Calcium Transport I	6,1E-01	1E-01	NaN	ANXA5
Histidine Degradation VI	6,1E-01	1E-01	NaN	HAL
IL-1 Signaling	6,09E-01	4,4E-02	NaN	GNAI2,GNAQ,GNB2L1,GNG12
Regulation of the Epithelial-Mesenchymal Transition Pathway	6E-01	3,8E-02	NaN	LOX,CDH2,TGFB1,MMP2,CTNNB1,TGFB2,RRAS
Cell Cycle Regulation by BTG Family Proteins	5,96E-01	5,71E-02	NaN	PPP2R4,PRMT1
Antiproliferative Role of Somatostatin Receptor 2	5,94E-01	4,76E-02	NaN	GNB2L1,GNG12,RRAS
Cell Cycle: G1/S Checkpoint Regulation	5,82E-01	4,69E-02	NaN	TGFB1,RPL11,TGFB2
Stearate Biosynthesis I (Animals)	5,79E-01	5,56E-02	NaN	FASN,ACOT7
SAPK/JNK Signaling	5,78E-01	4,26E-02	NaN	CDC42,HNRNPK,RRAS,RAC1
PPAR Signaling	5,78E-01	4,26E-02	NaN	HSP90B1,HSP90AB1,HSP90AA1,RRAS
Tec Kinase Signaling	5,67E-01	3,82E-02	NaN	GNAI2,GNAQ,ACTG1,GNB2L1,ITGB1,GNG12
Cleavage and Polyadenylation of Pre-mRNA	5,43E-01	8,33E-02	NaN	NUDT21
Glutaryl-CoA Degradation	5,43E-01	8,33E-02	NaN	HADH
Acyl-CoA Hydrolysis	5,43E-01	8,33E-02	NaN	ACOT7
GNRH Signaling	5,4E-01	3,88E-02	NaN	GNAI2,CDC42,GNAQ,RRAS,RAC1
GDNF Family Ligand-Receptor Interactions	5,34E-01	4,41E-02	NaN	CDC42,RRAS,RAC1
Antioxidant Action of Vitamin C	5,3E-01	4,04E-02	NaN	PRDX6,GSTO1,TXNRD1,PDIA3
Ovarian Cancer Signaling	5,24E-01	3,82E-02	NaN	MMP2,CTNNB1,RRAS,CD44,VEGFC
CCR5 Signaling in Macrophages	5,23E-01	4,35E-02	NaN	GNAI2,GNB2L1,GNG12
Role of MAPK Signaling in the Pathogenesis of Influenza	5,23E-01	4,35E-02	NaN	PRDX6,BAX,RRAS
Nitric Oxide Signaling in the Cardiovascular System	5,21E-01	4E-02	NaN	HSP90B1,HSP90AB1,HSP90AA1,VEGFC
Role of PKR in Interferon Induction and Antiviral Response	5,15E-01	5E-02	NaN	EIF2S1,CYCS
Thyroid Cancer Signaling	5,15E-01	5E-02	NaN	CTNNB1,RRAS
NAD Phosphorylation and Dephosphorylation	5,14E-01	7,69E-02	NaN	ACP1
Guanosine Nucleotides Degradation III	5,14E-01	7,69E-02	NaN	NT5E
Melatonin Signaling	5,12E-01	4,29E-02	NaN	GNAI2,GNAQ,PDIA3
PEDF Signaling	5,02E-01	4,23E-02	NaN	SERPINF1,RRAS,RAC1
GPCR-Mediated Integration of Enteroendocrine Signaling Exemplified by an L Cell	5,02E-01	4,23E-02	NaN	GNAI2,GNAQ,PDIA3
Human Embryonic Stem Cell Pluripotency	5,01E-01	3,73E-02	NaN	INHBA,TGFB1,CTNNB1,BMP1,TGFB2
Mechanisms of Viral Exit from Host Cells	5,01E-01	4,88E-02	NaN	ACTG1,LMNB2
IL-17 Signaling	4,91E-01	4,17E-02	NaN	MMP3,TIMP1,RRAS
Isoleucine Degradation I	4,87E-01	7,14E-02	NaN	ECHS1
Urate Biosynthesis/Inosine 5'-phosphate Degradation	4,87E-01	7,14E-02	NaN	NT5E
LPS-stimulated MAPK Signaling	4,81E-01	4,11E-02	NaN	CDC42,RRAS,RAC1
HGF Signaling	4,77E-01	3,81E-02	NaN	CDC42,ITGB1,RRAS,RAC1
CREB Signaling in Neurons	4,7E-01	3,51E-02	NaN	GNAI2,GNAQ,GNB2L1,GNG12,PDIA3,RRAS
nNOS Signaling in Skeletal Muscle Cells	4,63E-01	6,67E-02	NaN	DAG1
γ-glutamyl Cycle	4,63E-01	6,67E-02	NaN	ANPEP
NGF Signaling	4,61E-01	3,74E-02	NaN	CDC42,BAX,RRAS,RAC1
Sphingosine-1-phosphate Signaling	4,46E-01	3,67E-02	NaN	GNAI2,GNAQ,PDIA3,RAC1
Cyclins and Cell Cycle Regulation	4,34E-01	3,85E-02	NaN	TGFB1,PPP2R4,TGFB2
Corticotropin Releasing Hormone Signaling	4,31E-01	3,6E-02	NaN	ARPC5,GNAI2,GNAQ,KRT1
γ-linolenate Biosynthesis II (Animals)	4,2E-01	5,88E-02	NaN	CYB5R3
Adenosine Nucleotides Degradation II	4,2E-01	5,88E-02	NaN	NT5E
Glioblastoma Multiforme Signaling	4,19E-01	3,42E-02	NaN	CDC42,CTNNB1,PDIA3,RRAS,RAC1
Systemic Lupus Erythematosus Signaling	4,11E-01	3,26E-02	NaN	SNRPD2,C7,C5,SNRPD3,C9,HNRNPA2B1,RRAS
TNFR1 Signaling	4,02E-01	4,08E-02	NaN	CDC42,CYCS
Valine Degradation I	4,01E-01	5,56E-02	NaN	ECHS1
IL-6 Signaling	3,95E-01	3,45E-02	NaN	A2M,HSPB1,COL1A1,RRAS
Synaptic Long Term Potentiation	3,75E-01	3,36E-02	NaN	GNAQ,PPP1CB,PDIA3,RRAS
Endometrial Cancer Signaling	3,71E-01	3,85E-02	NaN	CTNNB1,RRAS
Gαi Signaling	3,69E-01	3,33E-02	NaN	GNAI2,GNB2L1,GNG12,RRAS
Granzyme A Signaling	3,66E-01	5E-02	NaN	NME1
Purine Nucleotides Degradation II (Aerobic)	3,66E-01	5E-02	NaN	NT5E
RAR Activation	3,64E-01	3,16E-02	NaN	TGFB1,TGFB2,IGFBP3,RAC1,MMP1,PRMT1
Sperm Motility	3,63E-01	3,31E-02	NaN	PRDX6,TWF1,PDIA3,PTK7
CTLA4 Signaling in Cytotoxic T Lymphocytes	3,54E-01	3,41E-02	NaN	PPP2R4,CLTC,AP2M1
UVA-Induced MAPK Signaling	3,54E-01	3,41E-02	NaN	PDIA3,CYCS,RRAS
Tryptophan Degradation III (Eukaryotic)	3,5E-01	4,76E-02	NaN	HADH
Crosstalk between Dendritic Cells and Natural Killer Cells	3,46E-01	3,37E-02	NaN	TLN1,ACTG1,FSCN1
Maturity Onset Diabetes of Young (MODY) Signaling	3,36E-01	4,55E-02	NaN	GAPDH
Tryptophan Degradation X (Mammalian, via Tryptamine)	3,36E-01	4,55E-02	NaN	AKR1A1
Ethanol Degradation IV	3,36E-01	4,55E-02	NaN	GPX7
Dopamine-DARPP32 Feedback in cAMP Signaling	3,34E-01	3,11E-02	NaN	GNAI2,GNAQ,PPP2R4,PPP1CB,PDIA3
PI3K Signaling in B Lymphocytes	3,22E-01	3,12E-02	NaN	C3,PDIA3,RRAS,RAC1
Chronic Myeloid Leukemia Signaling	3,2E-01	3,23E-02	NaN	TGFB1,TGFB2,RRAS
Salvage Pathways of Pyrimidine Ribonucleotides	3,2E-01	3,23E-02	NaN	CMPK1,NME1,AK1
Phospholipases	3,18E-01	3,45E-02	NaN	PRDX6,PDIA3
Triacylglycerol Degradation	3,09E-01	4,17E-02	NaN	PRDX6
Cardiac β-adrenergic Signaling	2,96E-01	3,01E-02	NaN	GNB2L1,PPP2R4,PPP1CB,GNG12
Role of NFAT in Regulation of the Immune Response	2,87E-01	2,92E-02	NaN	GNAI2,GNAQ,GNB2L1,GNG12,RRAS
GM-CSF Signaling	2,87E-01	3,23E-02	NaN	GNB2L1,RRAS
Relaxin Signaling	2,86E-01	2,96E-02	NaN	GNAI2,GNAQ,GNB2L1,GNG12
Endothelin-1 Signaling	2,83E-01	2,91E-02	NaN	PRDX6,GNAI2,GNAQ,PDIA3,RRAS
B Cell Receptor Signaling	2,74E-01	2,87E-02	NaN	CDC42,CFL1,RRAS,RAC1,CFL2
Dendritic Cell Maturation	2,62E-01	2,82E-02	NaN	COL3A1,COL1A2,PDIA3,COL1A1,FSCN1
Angiopoietin Signaling	2,59E-01	3,03E-02	NaN	ANGPT1,RRAS
Calcium Signaling	2,58E-01	2,81E-02	NaN	TPM3,TPM4,MYL9,TPM1,MYH9
Serotonin Degradation	2,53E-01	2,99E-02	NaN	AKR1A1,EXT2
Neurotrophin/TRK Signaling	2,53E-01	2,99E-02	NaN	CDC42,RRAS
IL-10 Signaling	2,47E-01	2,94E-02	NaN	BLVRB,BLVRA
Growth Hormone Signaling	2,41E-01	2,9E-02	NaN	A2M,IGFBP3
IL-3 Signaling	2,29E-01	2,82E-02	NaN	RRAS,RAC1
Cytotoxic T Lymphocyte-mediated Apoptosis of Target Cells	2,26E-01	3,12E-02	NaN	CYCS
Basal Cell Carcinoma Signaling	2,24E-01	2,78E-02	NaN	CTNNB1,BMP1
JAK/Stat Signaling	2,24E-01	2,78E-02	NaN	GNAQ,RRAS
TWEAK Signaling	2,1E-01	2,94E-02	NaN	CYCS
IL-17A Signaling in Fibroblasts	2,03E-01	2,86E-02	NaN	MMP1
Thyroid Hormone Metabolism II (via Conjugation and/or Degradation)	2,03E-01	2,86E-02	NaN	EXT2
Ethanol Degradation II	2,03E-01	2,86E-02	NaN	AKR1A1
Nucleotide Excision Repair Pathway	2,03E-01	2,86E-02	NaN	RAD23B
Interferon Signaling	1,96E-01	2,78E-02	NaN	BAX

## Sheet: A MSC REP
© 2000-2016 QIAGEN. All rights reserved.
Ingenuity Canonical Pathways	-log(p-value)	Ratio	z-score	Molecules
Remodeling of Epithelial Adherens Junctions	1,04E01	1,91E-01	NaN	ACTR2,ARPC3,VCL,TUBB,TUBB6,ACTN1,TUBA1C,TUBB4B,RAB5C,RAB7A,TUBA1A,ACTG1,ACTN4
Hepatic Fibrosis / Hepatic Stellate Cell Activation	1,01E01	1,04E-01	NaN	IGFBP4,MMP2,COL6A3,COL3A1,COL1A2,COL1A1,COL6A2,COL5A1,TIMP2,MYH9,A2M,MYL6,COL5A2,FN1,COL2A1,IGFBP3,TIMP1,SERPINE1,MMP1
Protein Ubiquitination Pathway	9,97E00	8,63E-02	NaN	PSMB6,PSMA4,UCHL1,HSP90B1,PSMA6,HSPD1,PSMA3,PSMB5,PSMB1,HSPB1,PSMA7,PSMB4,HSPA8,PSMB7,HSPA5,PSMA2,PSMB2,PSMB3,HSP90AB1,PSMA1,HSP90AA1,PSMA5
Inhibition of Matrix Metalloproteases	9,49E00	2,56E-01	NaN	A2M,MMP3,MMP2,THBS2,HSPG2,TIMP1,ADAM10,MMP1,TIMP2,MMP14
14-3-3-mediated Signaling	8,36E00	1,2E-01	NaN	YWHAQ,YWHAG,TUBB,TUBB6,TUBA1C,YWHAE,YWHAH,TUBB4B,VIM,TUBA1A,PDIA3,YWHAZ,RRAS,YWHAB
Epithelial Adherens Junction Signaling	8E00	1,03E-01	NaN	ACTR2,ARPC3,VCL,TUBB,TGFBR3,TUBB6,ACTN1,TUBA1C,TUBB4B,MYH9,MYL6,TUBA1A,ACTG1,ACTN4,RRAS
Actin Cytoskeleton Signaling	7,99E00	8,29E-02	NaN	ACTR2,TLN1,ARPC3,VCL,EZR,MYL12A,MSN,ACTN1,CFL2,MYH9,MYL6,FN1,CFL1,PFN1,ACTG1,KNG1,ACTN4,RRAS
Acute Phase Response Signaling	7,14E00	8,88E-02	NaN	C3,SERPINF1,ITIH3,C1R,A2M,C4A/C4B,FN1,APOA1,SERPINE1,C1S,AHSG,SERPING1,RRAS,ITIH2,ALB
Glycolysis I	7,09E00	2,8E-01	NaN	TPI1,PGAM1,PGK1,PKM,GAPDH,ALDOA,ENO1
Gluconeogenesis I	7,09E00	2,8E-01	NaN	PGAM1,PGK1,GAPDH,ALDOA,MDH2,ENO1,MDH1
Intrinsic Prothrombin Activation Pathway	6,6E00	2,41E-01	NaN	KNG1,COL3A1,COL1A2,COL2A1,COL1A1,F5,SERPINC1
IGF-1 Signaling	6,46E00	1,13E-01	NaN	IGFBP4,YWHAQ,YWHAG,IGFBP7,IGFBP3,YWHAE,YWHAZ,YWHAH,YWHAB,RRAS,IGFBP6
Atherosclerosis Signaling	6,23E00	9,68E-02	NaN	PRDX6,MMP3,APOB,CLU,COL3A1,APOA1,COL1A2,COL2A1,APOE,COL1A1,MMP1,ALB
Sertoli Cell-Sertoli Cell Junction Signaling	6,06E00	7,87E-02	NaN	VCL,TUBB,TGFBR3,TUBB6,ACTN1,TUBA1C,TUBB4B,SPTBN1,A2M,TUBA1A,ACTG1,ACTN4,RRAS,SPTAN1
Germ Cell-Sertoli Cell Junction Signaling	5,83E00	8,13E-02	NaN	VCL,TUBB,TUBB6,ACTN1,TUBA1C,TUBB4B,CFL2,A2M,TUBA1A,CFL1,ACTG1,ACTN4,RRAS
Axonal Guidance Signaling	5,82E00	5,07E-02	NaN	ACTR2,MMP2,ARPC3,TUBB,TUBB6,MYL12A,DPYSL2,ADAM10,TUBA1C,ADAMTS1,TUBB4B,CFL2,MYL6,GNAI2,TUBA1A,CFL1,PFN1,NRP1,SEMA7A,PDIA3,SDCBP,RRAS
Leukocyte Extravasation Signaling	5,51E00	7,07E-02	NaN	MMP2,VCL,EZR,MSN,ACTN1,TIMP2,MYL6,MMP3,GNAI2,ACTG1,TIMP1,ACTN4,MMP1,MMP14
RhoA Signaling	5,46E00	9,02E-02	NaN	MYL6,ACTR2,CFL1,PFN1,ARPC3,ACTG1,SEPT11,EZR,MYL12A,MSN,CFL2
EIF2 Signaling	5,13E00	7,03E-02	NaN	RPS18,RPS14,RPS3,RPS12,RPL12,RPL7,RPLP0,RPS15A,RPS8,EIF4A1,RPS3A,RRAS,RPL10A
ILK Signaling	5,1E00	6,99E-02	NaN	FLNB,VCL,ACTN1,CFL2,MYH9,VIM,MYL6,FN1,CFL1,ACTG1,PPP1R14B,FLNC,ACTN4
p70S6K Signaling	4,74E00	8,4E-02	NaN	GNAI2,YWHAQ,YWHAG,PDIA3,YWHAE,YWHAZ,YWHAH,EEF2,YWHAB,RRAS
RhoGDI Signaling	4,72E00	6,94E-02	NaN	MYL6,GNAI2,ACTR2,CFL1,ARPC3,ACTG1,EZR,ARHGDIA,MYL12A,MSN,GDI2,CFL2
LXR/RXR Activation	4,68E00	8,26E-02	NaN	C4A/C4B,APOB,C3,SERPINF1,CLU,KNG1,APOA1,APOE,AHSG,ALB
PI3K/AKT Signaling	4,62E00	8,13E-02	NaN	YWHAQ,YWHAG,HSP90B1,HSP90AB1,YWHAE,YWHAZ,HSP90AA1,YWHAH,YWHAB,RRAS
FXR/RXR Activation	4,5E00	7,87E-02	NaN	C4A/C4B,APOB,C3,SERPINF1,CLU,KNG1,APOA1,APOE,AHSG,ALB
Myc Mediated Apoptosis Signaling	4,49E00	1,21E-01	NaN	YWHAQ,YWHAG,YWHAE,YWHAZ,YWHAH,YWHAB,RRAS
ERK5 Signaling	4,25E00	1,11E-01	NaN	YWHAQ,YWHAG,YWHAE,YWHAZ,YWHAH,YWHAB,RRAS
Cell Cycle: G2/M DNA Damage Checkpoint Regulation	3,95E00	1,22E-01	NaN	YWHAQ,YWHAG,YWHAE,YWHAZ,YWHAH,YWHAB
phagosome maturation	3,94E00	7,5E-02	NaN	PRDX6,RAB5C,TUBA1A,RAB7A,TUBB,TUBB6,PRDX2,TUBA1C,TUBB4B
Clathrin-mediated Endocytosis Signaling	3,78E00	5,95E-02	NaN	RAB5C,RAB7A,ACTR2,APOB,ARPC3,ACTG1,HSPA8,CLU,APOA1,APOE,ALB
Semaphorin Signaling in Neurons	3,76E00	1,13E-01	NaN	CFL1,NRP1,DPYSL3,SEMA7A,DPYSL2,CFL2
Coagulation System	3,7E00	1,43E-01	NaN	A2M,KNG1,SERPINE1,F5,SERPINC1
Agranulocyte Adhesion and Diapedesis	3,69E00	5,82E-02	NaN	MYL6,GNAI2,MMP3,FN1,MMP2,ACTG1,EZR,MSN,MMP1,MYH9,MMP14
HIF1α Signaling	3,69E00	7,84E-02	NaN	MMP3,MMP2,LDHA,HSP90AA1,RRAS,MMP1,MMP14,LDHB
Regulation of Cellular Mechanics by Calpain Protease	3,58E00	1,05E-01	NaN	TLN1,VCL,EZR,ACTN1,ACTN4,RRAS
Complement System	3,58E00	1,35E-01	NaN	C4A/C4B,C3,C1S,C1R,SERPING1
Signaling by Rho Family GTPases	3,47E00	5,13E-02	NaN	VIM,MYL6,GNAI2,ACTR2,CFL1,ARPC3,ACTG1,SEPT11,EZR,MYL12A,MSN,CFL2
HIPPO signaling	3,39E00	8,14E-02	NaN	YWHAQ,YWHAG,PPP1R14B,YWHAE,YWHAZ,YWHAH,YWHAB
Regulation of eIF4 and p70S6K Signaling	3,3E00	6,16E-02	NaN	RPS18,RPS15A,RPS8,EIF4A1,RPS3A,RRAS,RPS14,RPS12,RPS3
Regulation of Actin-based Motility by Rho	3,25E00	7,69E-02	NaN	MYL6,ACTR2,CFL1,PFN1,ARPC3,ARHGDIA,MYL12A
Pentose Phosphate Pathway	3,24E00	2,73E-01	NaN	TKT,PGD,PGLS
Gap Junction Signaling	3,11E00	5,81E-02	NaN	GNAI2,TUBA1A,ACTG1,TUBB,TUBB6,PDIA3,TUBA1C,RRAS,TUBB4B
Caveolar-mediated Endocytosis Signaling	3,07E00	8,45E-02	NaN	FLNB,RAB5C,ACTG1,PTRF,FLNC,ALB
Integrin Signaling	2,88E00	4,98E-02	NaN	ACTR2,ARPC3,TLN1,VCL,ACTG1,ARF4,MYL12A,ACTN1,ACTN4,RRAS
Telomere Extension by Telomerase	2,82E00	2E-01	NaN	HNRNPA1,XRCC5,HNRNPA2B1
Unfolded protein response	2,81E00	9,26E-02	NaN	HSPA8,HSP90B1,HSPA5,VCP,P4HB
Oncostatin M Signaling	2,72E00	1,18E-01	NaN	MMP3,CHI3L1,RRAS,MMP1
Pentose Phosphate Pathway (Oxidative Branch)	2,63E00	4E-01	NaN	PGD,PGLS
Serine Biosynthesis	2,63E00	4E-01	NaN	PSAT1,PHGDH
Bladder Cancer Signaling	2,61E00	6,9E-02	NaN	MMP3,MMP2,THBS1,RRAS,MMP1,MMP14
Aldosterone Signaling in Epithelial Cells	2,56E00	5,26E-02	NaN	HSPB1,HSPA8,HSP90B1,HSPA5,HSPD1,PDIA3,HSP90AB1,HSP90AA1
ERK/MAPK Signaling	2,55E00	4,81E-02	NaN	HSPB1,YWHAQ,YWHAG,TLN1,PPP1R14B,YWHAZ,YWHAH,YWHAB,RRAS
mTOR Signaling	2,53E00	4,79E-02	NaN	RPS18,RPS15A,RPS8,EIF4A1,RPS3A,RRAS,RPS14,RPS12,RPS3
Protein Kinase A Signaling	2,49E00	3,63E-02	NaN	FLNB,YWHAQ,YWHAG,MYL12A,YWHAE,YWHAH,MYL6,GNAI2,PYGB,PPP1R14B,PDIA3,FLNC,YWHAZ,YWHAB
VEGF Signaling	2,49E00	6,52E-02	NaN	VCL,ACTG1,ACTN1,ACTN4,YWHAE,RRAS
Hypoxia Signaling in the Cardiovascular System	2,46E00	7,69E-02	NaN	HSP90B1,LDHA,HSP90AB1,HSP90AA1,P4HB
Pyruvate Fermentation to Lactate	2,45E00	3,33E-01	NaN	LDHA,LDHB
Rapoport-Luebering Glycolytic Shunt	2,45E00	3,33E-01	NaN	PGAM1,MINPP1
Glucocorticoid Receptor Signaling	2,37E00	4E-02	NaN	A2M,HSPA8,HSP90B1,HSPA5,SERPINE1,HSP90AB1,HSP90AA1,YWHAH,RRAS,MMP1,ANXA1
Superpathway of Serine and Glycine Biosynthesis I	2,31E00	2,86E-01	NaN	PSAT1,PHGDH
Aspartate Degradation II	2,31E00	2,86E-01	NaN	MDH2,MDH1
Paxillin Signaling	2,29E00	5,94E-02	NaN	TLN1,VCL,ACTG1,ACTN1,ACTN4,RRAS
Ephrin Receptor Signaling	2,21E00	4,6E-02	NaN	GNAI2,ACTR2,CFL1,ARPC3,SDCBP,ADAM10,RRAS,CFL2
Airway Pathology in Chronic Obstructive Pulmonary Disease	2,19E00	2,5E-01	NaN	MMP2,MMP1
Granulocyte Adhesion and Diapedesis	2,16E00	4,52E-02	NaN	HSPB1,GNAI2,MMP3,MMP2,EZR,MSN,MMP1,MMP14
Sucrose Degradation V (Mammalian)	2,09E00	2,22E-01	NaN	TPI1,ALDOA
Prostate Cancer Signaling	2,03E00	6,1E-02	NaN	HSP90B1,HSP90AB1,GSTP1,HSP90AA1,RRAS
Breast Cancer Regulation by Stathmin1	1,97E00	4,19E-02	NaN	GNAI2,TUBA1A,TUBB,PPP1R14B,TUBB6,TUBA1C,RRAS,TUBB4B
Glioma Invasiveness Signaling	1,92E00	7,02E-02	NaN	MMP2,TIMP1,RRAS,TIMP2
Neuregulin Signaling	1,91E00	5,68E-02	NaN	HSP90B1,DCN,HSP90AB1,HSP90AA1,RRAS
PAK Signaling	1,89E00	5,62E-02	NaN	MYL6,CFL1,MYL12A,RRAS,CFL2
Fcγ Receptor-mediated Phagocytosis in Macrophages and Monocytes	1,81E00	5,38E-02	NaN	ACTR2,ARPC3,TLN1,ACTG1,EZR
Acetyl-CoA Biosynthesis III (from Citrate)	1,81E00	1E00	NaN	ACLY
IL-12 Signaling and Production in Macrophages	1,72E00	4,48E-02	NaN	RAB7A,APOB,CLU,APOA1,APOE,ALB
Colanic Acid Building Blocks Biosynthesis	1,71E00	1,43E-01	NaN	UGP2,UGDH
Antigen Presentation Pathway	1,7E00	8,11E-02	NaN	PSMB6,PDIA3,PSMB5
PPARα/RXRα Activation	1,64E00	3,91E-02	NaN	HSP90B1,TGFBR3,APOA1,PDIA3,HSP90AB1,HSP90AA1,RRAS
tRNA Charging	1,64E00	7,69E-02	NaN	GARS,HARS,WARS
Agrin Interactions at Neuromuscular Junction	1,64E00	5,8E-02	NaN	ACTG1,LAMB1,LAMC1,RRAS
Aryl Hydrocarbon Receptor Signaling	1,64E00	4,29E-02	NaN	HSPB1,HSP90B1,HSP90AB1,GSTP1,CTSD,HSP90AA1
NRF2-mediated Oxidative Stress Response	1,63E00	3,89E-02	NaN	ACTG1,TXN,ERP29,PPIB,VCP,GSTP1,RRAS
Rac Signaling	1,62E00	4,81E-02	NaN	ACTR2,CFL1,ARPC3,RRAS,CFL2
eNOS Signaling	1,61E00	4,23E-02	NaN	HSPA8,KNG1,HSP90B1,HSPA5,HSP90AB1,HSP90AA1
Neuroprotective Role of THOP1 in Alzheimer's Disease	1,61E00	7,5E-02	NaN	KNG1,APP,YWHAE
Extrinsic Prothrombin Activation Pathway	1,6E00	1,25E-01	NaN	F5,SERPINC1
Parkinson's Signaling	1,6E00	1,25E-01	NaN	PARK7,UCHL1
Ephrin B Signaling	1,56E00	5,48E-02	NaN	GNAI2,CFL1,CAP1,CFL2
Role of Tissue Factor in Cancer	1,53E00	4,55E-02	NaN	CFL1,RRAS,MMP1,CFL2,P4HB
UDP-D-xylose and UDP-D-glucuronate Biosynthesis	1,51E00	5E-01	NaN	UGDH
Glutamate Biosynthesis II	1,51E00	5E-01	NaN	GLUD1
Glutamate Degradation X	1,51E00	5E-01	NaN	GLUD1
Ephrin A Signaling	1,41E00	6,25E-02	NaN	CFL1,ADAM10,CFL2
Endoplasmic Reticulum Stress Pathway	1,37E00	9,52E-02	NaN	HSP90B1,HSPA5
Diphthamide Biosynthesis	1,34E00	3,33E-01	NaN	EEF2
NADH Repair	1,34E00	3,33E-01	NaN	GAPDH
Thyroid Hormone Biosynthesis	1,34E00	3,33E-01	NaN	CTSD
FAK Signaling	1,32E00	4,6E-02	NaN	TLN1,VCL,ACTG1,RRAS
Tight Junction Signaling	1,32E00	3,59E-02	NaN	MYL6,VCL,ACTG1,MYH9,NUDT21,SPTAN1
Cdc42 Signaling	1,32E00	3,59E-02	NaN	MYL6,ACTR2,CFL1,ARPC3,MYL12A,CFL2
TCA Cycle II (Eukaryotic)	1,3E00	8,7E-02	NaN	MDH2,MDH1
Virus Entry via Endocytic Pathways	1,29E00	4,49E-02	NaN	FLNB,ACTG1,FLNC,RRAS
Cellular Effects of Sildenafil (Viagra)	1,28E00	3,88E-02	NaN	MYL6,ACTG1,MYL12A,PDIA3,MYH9
Mitochondrial Dysfunction	1,28E00	3,51E-02	NaN	VDAC1,PARK7,ATP5A1,APP,PRDX3,ATP5B
Death Receptor Signaling	1,25E00	4,35E-02	NaN	HSPB1,ACTG1,LMNA,SPTAN1
Actin Nucleation by ARP-WASP Complex	1,24E00	5,36E-02	NaN	ACTR2,ARPC3,RRAS
PPAR Signaling	1,22E00	4,26E-02	NaN	HSP90B1,HSP90AB1,HSP90AA1,RRAS
Dendritic Cell Maturation	1,22E00	3,39E-02	NaN	COL3A1,COL1A2,PDIA3,COL2A1,COL1A1,FSCN1
Uracil Degradation II (Reductive)	1,21E00	2,5E-01	NaN	DPYSL2
Glutathione Redox Reactions II	1,21E00	2,5E-01	NaN	PDIA3
Thymine Degradation	1,21E00	2,5E-01	NaN	DPYSL2
Production of Nitric Oxide and Reactive Oxygen Species in Macrophages	1,19E00	3,33E-02	NaN	APOB,PPP1R14B,CLU,APOA1,APOE,ALB
CDK5 Signaling	1,15E00	4,04E-02	NaN	PPP1R14B,LAMB1,LAMC1,RRAS
Telomerase Signaling	1,15E00	4,04E-02	NaN	HSP90B1,HSP90AB1,HSP90AA1,RRAS
Nitric Oxide Signaling in the Cardiovascular System	1,14E00	4E-02	NaN	KNG1,HSP90B1,HSP90AB1,HSP90AA1
Glutathione-mediated Detoxification	1,12E00	6,9E-02	NaN	ANPEP,GSTP1
PCP pathway	1,12E00	4,76E-02	NaN	HSPB1,PFN1,CTHRC1
Mitotic Roles of Polo-Like Kinase	1,07E00	4,55E-02	NaN	HSP90B1,HSP90AB1,HSP90AA1
fMLP Signaling in Neutrophils	1,05E00	3,7E-02	NaN	GNAI2,ACTR2,ARPC3,RRAS
Arginine Biosynthesis IV	1,04E00	1,67E-01	NaN	GLUD1
Thioredoxin Pathway	1,04E00	1,67E-01	NaN	TXN
Pentose Phosphate Pathway (Non-oxidative Branch)	1,04E00	1,67E-01	NaN	TKT
Glycogen Biosynthesis II (from UDP-D-Glucose)	1,04E00	1,67E-01	NaN	UGP2
Inhibition of Angiogenesis by TSP1	1,01E00	5,88E-02	NaN	HSPG2,THBS1
Chemokine Signaling	9,99E-01	4,23E-02	NaN	GNAI2,CFL1,RRAS
IL-17 Signaling	9,86E-01	4,17E-02	NaN	MMP3,TIMP1,RRAS
IL-6 Signaling	9,62E-01	3,45E-02	NaN	A2M,HSPB1,COL1A1,RRAS
CCR3 Signaling in Eosinophils	9,52E-01	3,42E-02	NaN	GNAI2,CFL1,RRAS,CFL2
Docosahexaenoic Acid (DHA) Signaling	9,06E-01	5,13E-02	NaN	SERPINF1,APP
Cardiac Hypertrophy Signaling	8,58E-01	2,69E-02	NaN	HSPB1,MYL6,GNAI2,MYL12A,PDIA3,RRAS
Calcium Transport I	8,36E-01	1E-01	NaN	ANXA5
Glycogen Degradation II	8,36E-01	1E-01	NaN	PYGB
Calcium Signaling	8,3E-01	2,81E-02	NaN	MYL6,TPM3,TPM4,TPM2,MYH9
α-Adrenergic Signaling	8,07E-01	3,45E-02	NaN	GNAI2,PYGB,RRAS
TGF-β Signaling	8,07E-01	3,45E-02	NaN	INHBA,SERPINE1,RRAS
Crosstalk between Dendritic Cells and Natural Killer Cells	7,87E-01	3,37E-02	NaN	TLN1,ACTG1,FSCN1
Apoptosis Signaling	7,87E-01	3,37E-02	NaN	RRAS,LMNA,SPTAN1
Cleavage and Polyadenylation of Pre-mRNA	7,63E-01	8,33E-02	NaN	NUDT21
Glycogen Degradation III	7,63E-01	8,33E-02	NaN	PYGB
Thrombin Signaling	7,43E-01	2,62E-02	NaN	MYL6,GNAI2,MYL12A,PDIA3,RRAS
Synaptic Long Term Depression	7,37E-01	2,82E-02	NaN	PRDX6,GNAI2,PDIA3,RRAS
Guanosine Nucleotides Degradation III	7,32E-01	7,69E-02	NaN	NT5E
DNA Double-Strand Break Repair by Non-Homologous End Joining	7,03E-01	7,14E-02	NaN	XRCC5
Urate Biosynthesis/Inosine 5'-phosphate Degradation	7,03E-01	7,14E-02	NaN	NT5E
p53 Signaling	7,02E-01	3,06E-02	NaN	SERPINE2,THBS1,TP53I3
Antioxidant Action of Vitamin C	6,93E-01	3,03E-02	NaN	PRDX6,TXN,PDIA3
Chondroitin Sulfate Degradation (Metazoa)	6,76E-01	6,67E-02	NaN	HEXB
γ-glutamyl Cycle	6,76E-01	6,67E-02	NaN	ANPEP
Vitamin-C Transport	6,76E-01	6,67E-02	NaN	TXN
CXCR4 Signaling	6,67E-01	2,63E-02	NaN	MYL6,GNAI2,MYL12A,RRAS
Dermatan Sulfate Degradation (Metazoa)	6,51E-01	6,25E-02	NaN	HEXB
Phospholipases	6,38E-01	3,45E-02	NaN	PRDX6,PDIA3
RAN Signaling	6,28E-01	5,88E-02	NaN	RAN
Adenosine Nucleotides Degradation II	6,28E-01	5,88E-02	NaN	NT5E
Systemic Lupus Erythematosus Signaling	6,06E-01	2,33E-02	NaN	SNRPD2,KNG1,SNRPD3,HNRNPA2B1,RRAS
Glutathione Redox Reactions I	5,86E-01	5,26E-02	NaN	PRDX6
D-myo-inositol (1,3,4)-trisphosphate Biosynthesis	5,86E-01	5,26E-02	NaN	MINPP1
Purine Nucleotides Degradation II (Aerobic)	5,67E-01	5E-02	NaN	NT5E
Gα12/13 Signaling	5,57E-01	2,56E-02	NaN	MYL6,MYL12A,RRAS
PTEN Signaling	5,5E-01	2,54E-02	NaN	TGFBR3,YWHAH,RRAS
Endothelin-1 Signaling	5,48E-01	2,33E-02	NaN	PRDX6,GNAI2,PDIA3,RRAS
Synaptic Long Term Potentiation	5,44E-01	2,52E-02	NaN	PPP1R14B,PDIA3,RRAS
P2Y Purigenic Receptor Signaling Pathway	5,44E-01	2,52E-02	NaN	GNAI2,PDIA3,RRAS
Macropinocytosis Signaling	5,4E-01	2,94E-02	NaN	ACTN4,RRAS
Maturity Onset Diabetes of Young (MODY) Signaling	5,33E-01	4,55E-02	NaN	GAPDH
Pyrimidine Deoxyribonucleotides De Novo Biosynthesis I	5,33E-01	4,55E-02	NaN	AK1
Growth Hormone Signaling	5,32E-01	2,9E-02	NaN	A2M,IGFBP3
Role of MAPK Signaling in the Pathogenesis of Influenza	5,32E-01	2,9E-02	NaN	PRDX6,RRAS
Melatonin Signaling	5,23E-01	2,86E-02	NaN	GNAI2,PDIA3
PEDF Signaling	5,15E-01	2,82E-02	NaN	SERPINF1,RRAS
GPCR-Mediated Integration of Enteroendocrine Signaling Exemplified by an L Cell	5,15E-01	2,82E-02	NaN	GNAI2,PDIA3
Colorectal Cancer Metastasis Signaling	5,07E-01	2,12E-02	NaN	MMP3,MMP2,RRAS,MMP1,MMP14
Triacylglycerol Degradation	5,01E-01	4,17E-02	NaN	PRDX6
Superpathway of D-myo-inositol (1,4,5)-trisphosphate Metabolism	5,01E-01	4,17E-02	NaN	MINPP1
STAT3 Pathway	4,99E-01	2,74E-02	NaN	TGFBR3,RRAS
PI3K Signaling in B Lymphocytes	4,89E-01	2,34E-02	NaN	C3,PDIA3,RRAS
HER-2 Signaling in Breast Cancer	4,76E-01	2,63E-02	NaN	MMP2,RRAS
VEGF Family Ligand-Receptor Interactions	4,76E-01	2,63E-02	NaN	NRP1,RRAS
Lipid Antigen Presentation by CD1	4,73E-01	3,85E-02	NaN	PDIA3
NAD Salvage Pathway II	4,73E-01	3,85E-02	NaN	NT5E
VDR/RXR Activation	4,61E-01	2,56E-02	NaN	IGFBP3,IGFBP6
Insulin Receptor Signaling	4,56E-01	2,24E-02	NaN	PPP1R14B,ACLY,RRAS
Reelin Signaling in Neurons	4,54E-01	2,53E-02	NaN	APP,APOE
Acute Myeloid Leukemia Signaling	4,54E-01	2,53E-02	NaN	IDH1,RRAS
Ceramide Signaling	4,47E-01	2,5E-02	NaN	CTSD,RRAS
Pyrimidine Ribonucleotides Interconversion	4,35E-01	3,45E-02	NaN	AK1
Role of p14/p19ARF in Tumor Suppression	4,23E-01	3,33E-02	NaN	NPM1
GPCR-Mediated Nutrient Sensing in Enteroendocrine Cells	4,21E-01	2,38E-02	NaN	GNAI2,PDIA3
TR/RXR Activation	4,14E-01	2,35E-02	NaN	COL6A3,ENO1
Pyrimidine Ribonucleotides De Novo Biosynthesis	4,12E-01	3,23E-02	NaN	AK1
G Beta Gamma Signaling	3,96E-01	2,27E-02	NaN	GNAI2,RRAS
UVA-Induced MAPK Signaling	3,96E-01	2,27E-02	NaN	PDIA3,RRAS
Xenobiotic Metabolism Signaling	3,78E-01	1,85E-02	NaN	HSP90B1,HSP90AB1,GSTP1,HSP90AA1,RRAS
IL-17A Signaling in Fibroblasts	3,72E-01	2,86E-02	NaN	MMP1
Role of Osteoblasts, Osteoclasts and Chondrocytes in Rheumatoid Arthritis	3,48E-01	1,83E-02	NaN	MMP3,COL1A1,MMP1,MMP14
Dopamine-DARPP32 Feedback in cAMP Signaling	3,34E-01	1,86E-02	NaN	GNAI2,PPP1R14B,PDIA3
Thyroid Cancer Signaling	3,29E-01	2,5E-02	NaN	RRAS
FcγRIIB Signaling in B Lymphocytes	3,22E-01	2,44E-02	NaN	RRAS
Mechanisms of Viral Exit from Host Cells	3,22E-01	2,44E-02	NaN	ACTG1
Huntington's Disease Signaling	3,16E-01	1,75E-02	NaN	HSPA8,HSPA5,CTSD,ATP5B
Melanoma Signaling	3,14E-01	2,38E-02	NaN	RRAS
UVC-Induced MAPK Signaling	3,14E-01	2,38E-02	NaN	RRAS
Role of Macrophages, Fibroblasts and Endothelial Cells in Rheumatoid Arthritis	3,06E-01	1,69E-02	NaN	MMP3,FN1,PDIA3,RRAS,MMP1
CREB Signaling in Neurons	2,99E-01	1,75E-02	NaN	GNAI2,PDIA3,RRAS
Sphingosine-1-phosphate Signaling	2,92E-01	1,83E-02	NaN	GNAI2,PDIA3
Oxidative Phosphorylation	2,92E-01	1,83E-02	NaN	ATP5A1,ATP5B
phagosome formation	2,92E-01	1,83E-02	NaN	FN1,PDIA3
B Cell Receptor Signaling	2,89E-01	1,72E-02	NaN	CFL1,RRAS,CFL2
MSP-RON Signaling Pathway	2,87E-01	2,17E-02	NaN	ACTG1
Corticotropin Releasing Hormone Signaling	2,83E-01	1,8E-02	NaN	GNAI2,KRT1
Androgen Signaling	2,83E-01	1,8E-02	NaN	GNAI2,HSP90AA1
Role of NFAT in Cardiac Hypertrophy	2,73E-01	1,68E-02	NaN	GNAI2,PDIA3,RRAS
Heparan Sulfate Biosynthesis (Late Stages)	2,63E-01	2E-02	NaN	PRDX6
IL-8 Signaling	2,58E-01	1,63E-02	NaN	GNAI2,MMP2,RRAS
Regulation of the Epithelial-Mesenchymal Transition Pathway	2,58E-01	1,63E-02	NaN	LOX,MMP2,RRAS
Amyloid Processing	2,57E-01	1,96E-02	NaN	APP
CD28 Signaling in T Helper Cells	2,57E-01	1,69E-02	NaN	ACTR2,ARPC3
CNTF Signaling	2,52E-01	1,92E-02	NaN	RRAS
Endometrial Cancer Signaling	2,52E-01	1,92E-02	NaN	RRAS
HMGB1 Signaling	2,5E-01	1,67E-02	NaN	SERPINE1,RRAS
Gαi Signaling	2,5E-01	1,67E-02	NaN	GNAI2,RRAS
IL-2 Signaling	2,46E-01	1,89E-02	NaN	RRAS
Sperm Motility	2,46E-01	1,65E-02	NaN	PRDX6,PDIA3
Role of IL-17A in Arthritis	2,41E-01	1,85E-02	NaN	MMP1
Thrombopoietin Signaling	2,36E-01	1,82E-02	NaN	RRAS
Wnt/Ca+ pathway	2,31E-01	1,79E-02	NaN	PDIA3
Role of Pattern Recognition Receptors in Recognition of Bacteria and Viruses	2,3E-01	1,59E-02	NaN	C3,PTX3
ErbB2-ErbB3 Signaling	2,26E-01	1,75E-02	NaN	RRAS
Heparan Sulfate Biosynthesis	2,26E-01	1,75E-02	NaN	PRDX6
Estrogen Receptor Signaling	2,26E-01	1,57E-02	NaN	PHB2,RRAS
Induction of Apoptosis by HIV1	2,13E-01	1,67E-02	NaN	SLC25A5
ErbB4 Signaling	2,13E-01	1,67E-02	NaN	RRAS
GM-CSF Signaling	2,04E-01	1,61E-02	NaN	RRAS
Activation of IRF by Cytosolic Pattern Recognition Receptors	2E-01	1,59E-02	NaN	PPIB
Antiproliferative Role of Somatostatin Receptor 2	2E-01	1,59E-02	NaN	RRAS
Estrogen-Dependent Breast Cancer Signaling	2E-01	1,59E-02	NaN	RRAS
Role of JAK1 and JAK3 in γc Cytokine Signaling	2E-01	1,59E-02	NaN	RRAS

## Sheet: A MSC DOXO
© 2000-2016 QIAGEN. All rights reserved.
Ingenuity Canonical Pathways	-log(p-value)	Ratio	z-score	Molecules
Protein Ubiquitination Pathway	3,15E01	2,51E-01	NaN	PSMD3,PSMD6,PSMB5,CUL2,PSMC4,PSMA7,PSMB7,UBE2V2,PSMA2,PSMB2,PSMA1,HSPB6,TCEB2,UBE2L3,PSMA4,CRYAB,HSP90B1,PSMA6,UBE2V1,PSME1,USO1,HSPB1,DNAJC8,PSMC2,PSMD12,USP9X,PSMB4,PSMC5,PSMD1,HSPH1,PSMC6,PSMB10,PSMB9,PSMB6,UBA1,PSMD7,HSPD1,PSMA3,USP5,HSPE1,PSMD11,PSMB1,HSPA8,PSMD9,SKP1,TCEB1,PSMD14,PSMC1,PSMB3,PSMD2,HSP90AA1,PSMD5,PSMA5,DNAJC10,UBE2N,UBE2D3,HSPA4,HSPA9,HLA-A,UBE2I,HSPA5,UCHL3,PSMD13,HSP90AB1
EIF2 Signaling	3,13E01	2,97E-01	NaN	RPL7A,RPLP1,RPS19,EIF3E,RPL30,RPL11,RPS18,EIF3A,RPLP2,RPS7,PABPC1,EIF3L,RPS12,RPS16,NRAS,RPLP0,PPP1CB,EIF3K,EIF3C,EIF3F,EIF2S1,EIF3M,RPS10,RPS26,EIF4A2,EIF3B,EIF3I,RPS20,RPL6,RPL12,RPL5,RPS15A,RPL3,GRB2,EIF2B1,EIF4A1,EIF4A3,RPS3A,RPL4,RPS21,MAPK3,RPS25,RPS2,RPS14,RPL23A,RPSA,RPS3,EIF2S3,RPL18,RPS17,MAPK1,EIF4E,RPS4X,RRAS,RPL10A
Regulation of eIF4 and p70S6K Signaling	2,33E01	2,88E-01	NaN	EIF2S1,EIF3M,RPS10,RPS26,EIF4A2,EIF3B,EIF3I,RPS20,RPS19,EIF3E,ITGB1,RPS15A,GRB2,PPP2R1A,EIF2B1,EIF4A1,RPS3A,EIF4A3,RPS21,MAPK3,RPS25,RPS18,EIF3A,RPS7,PABPC1,EIF3L,RPS2,RPS14,RPS12,RPS3,RPSA,RPS16,NRAS,EIF2S3,RPS17,MAPK1,EIF3K,RPS4X,EIF4E,EIF3C,RRAS,EIF3F
mTOR Signaling	1,88E01	2,23E-01	NaN	EIF3M,RPS10,RPS26,FKBP1A,EIF4B,RHOC,EIF4A2,EIF3B,EIF3I,RPS20,RPS19,EIF3E,RPS15A,PPP2R1A,EIF4A1,RPS3A,EIF4A3,RPS21,MAPK3,RPS25,RPS18,EIF3A,RPS7,EIF3L,RPS2,RPS14,RPS12,RPS3,RHOA,RPSA,RPS16,NRAS,RPS17,MAPK1,EIF3K,RPS4X,EIF4E,RHEB,EIF3C,RRAS,RAC1,EIF3F
Remodeling of Epithelial Adherens Junctions	1,82E01	3,82E-01	NaN	IQGAP1,ACTR2,VCL,TUBB3,TUBB6,MAPRE1,TUBA1C,ARPC1B,RAB5C,ARPC5,RAB7A,TUBA1A,ACTG1,ACTN4,CTNNA1,ARPC3,TUBB,CTNNB1,RAB5A,ACTN1,NME1,ACTR3,TUBB4B,ARPC2,RAB5B,RALA
Actin Cytoskeleton Signaling	1,56E01	1,89E-01	NaN	IQGAP1,CDC42,ACTR2,VCL,TLN2,ARPC1B,MYH9,ARPC5,FN1,CFL1,PFN1,ACTG1,KNG1,ITGB1,GRB2,CRK,ACTN4,MAPK3,TLN1,ARPC3,PPP1R12A,FLNA,EZR,MYL12A,MSN,MYH10,FGF2,ACTN1,MYL9,ACTR3,CFL2,RDX,PIP4K2A,RHOA,ARPC2,NRAS,MAPK1,PPP1CB,PFN2,RRAS,RAC1
Clathrin-mediated Endocytosis Signaling	1,49E01	2E-01	NaN	CDC42,ACTR2,RBP4,ARPC1B,AP1B1,RAB5C,ARPC5,RAB7A,ACTG1,HSPA8,ITGB1,GRB2,RAB11B,ALB,SH3GL1,RAB4A,ARPC3,SNX9,CLTC,RAB5A,AP2B1,FGF2,ACTR3,ARPC2,RAB5B,USP9X,PICALM,CLTA,CLU,AP2A2,APOA1,AP2A1,APOE,CLTB,AP2M1,CSNK2A1,RAC1
tRNA Charging	1,32E01	4,36E-01	NaN	NARS,YARS,SARS,DARS,FARSB,QARS,GARS,EPRS,TARS,AARS,HARS,LARS,RARS,KARS,VARS,IARS,WARS
Integrin Signaling	1,3E01	1,79E-01	NaN	CDC42,ACTR2,ITGAV,VCL,RHOC,PARVA,TLN2,ARPC1B,ARPC5,ACTG1,ITGB1,GRB2,CRK,ACTN4,CAPNS1,MAPK3,CAPN2,TLN1,ARPC3,PPP1R12A,CAPN1,MYL12A,ACTN1,MYL9,ACTR3,RHOA,ARPC2,ARF1,CAV1,NRAS,RALA,ARF4,MAPK1,PPP1CB,RRAS,RAC1
Caveolar-mediated Endocytosis Signaling	1,22E01	2,96E-01	NaN	FLNB,ITGAV,COPB2,FLNA,PTRF,RAB5A,COPG1,RAB5C,CAV1,HLA-A,RAB5B,ACTG1,COPA,COPG2,ITGB1,COPE,COPB1,FLNC,COPZ1,ARCN1,ALB
RhoGDI Signaling	1,13E01	1,79E-01	NaN	CDC42,GNA11,ACTR2,GNB1,GDI2,RHOC,ARPC1B,ARPC5,GNAI2,CFL1,ACTG1,ITGB1,ARHGDIA,CDH11,ARPC3,GNB2L1,PPP1R12A,EZR,MYL12A,MSN,ARHGAP1,MYL9,ACTR3,CD44,CFL2,RDX,PIP4K2A,RHOA,ARPC2,GNAS,RAC1
Epithelial Adherens Junction Signaling	1,1E01	1,92E-01	NaN	IQGAP1,CDC42,ACTR2,VCL,TUBB3,TUBB6,TUBA1C,ARPC1B,MYH9,ARPC5,TUBA1A,ACTG1,CRK,ACTN4,CTNNA1,ARPC3,TUBB,CTNNB1,MYH10,ACTN1,MYL9,ACTR3,TUBB4B,RHOA,ARPC2,NRAS,RRAS,RAC1
phagosome maturation	9,91E00	2E-01	NaN	DYNC1H1,TUBB3,TUBB,TUBB6,NAPA,RAB5A,YKT6,ATP6V1A,TUBA1C,PRDX1,TUBB4B,PRDX6,RAB5C,LAMP1,RAB7A,TUBA1A,HLA-A,RAB5B,DYNLT1,ATP6V1B2,PRDX5,EEA1,CANX,PRDX2
RhoA Signaling	9,76E00	1,97E-01	NaN	ACTR2,ARPC3,PPP1R12A,EZR,MYL12A,MSN,ARHGAP1,MYL9,ARPC1B,ACTR3,SEPT2,RDX,CFL2,PIP4K2A,RHOA,ARPC2,ARPC5,CFL1,PFN1,ACTG1,KTN1,SEPT9,PPP1CB,PFN2
Signaling by Rho Family GTPases	9,71E00	1,45E-01	NaN	IQGAP1,CDC42,GNA11,ACTR2,GNB1,RHOC,ARPC1B,VIM,ARPC5,GNAI2,CFL1,ACTG1,ITGB1,CDH11,MAPK3,ARPC3,GNB2L1,PPP1R12A,EZR,MYL12A,MSN,MYL9,ACTR3,SEPT2,STMN1,CFL2,RDX,PIP4K2A,RHOA,ARPC2,GNAS,SEPT9,MAPK1,RAC1
Regulation of Actin-based Motility by Rho	9,13E00	2,2E-01	NaN	CDC42,ACTR2,ARPC3,PPP1R12A,MYL12A,RHOC,MYL9,ARPC1B,ACTR3,PIP4K2A,RHOA,ARPC2,ARPC5,CFL1,PFN1,ITGB1,ARHGDIA,PPP1CB,RAC1,PFN2
Breast Cancer Regulation by Stathmin1	8,83E00	1,52E-01	NaN	CDC42,TUBB3,TUBB6,PPP1R7,GNB1,CAMK2D,TUBA1C,GNAI2,TUBA1A,PPP1R14B,GRB2,PPP2R1A,PLCB3,MAPK3,PRKAR2A,GNB2L1,TUBB,PPP1R12A,STMN1,TUBB4B,RHOA,PRKAR1A,NRAS,GNAS,MAPK1,PPP1CB,PRKACA,RRAS,RAC1
14-3-3-mediated Signaling	8,61E00	1,88E-01	NaN	YWHAQ,YWHAG,TUBB3,TUBB,TUBB6,TUBA1C,YWHAE,YWHAH,TUBB4B,VIM,NRAS,TUBA1A,MAPK1,GRB2,PLCB3,PDIA3,BAX,YWHAZ,YWHAB,RRAS,PDCD6IP,MAPK3
Virus Entry via Endocytic Pathways	8,48E00	2,13E-01	NaN	FLNB,CDC42,FLNA,CLTC,AP2B1,AP1B1,NRAS,CAV1,HLA-A,CLTA,ACTG1,ITGB1,AP2A2,AP2A1,FLNC,CLTB,AP2M1,RRAS,RAC1
Actin Nucleation by ARP-WASP Complex	8,26E00	2,68E-01	NaN	CDC42,ACTR2,ARPC3,PPP1R12A,RHOC,ARPC1B,ACTR3,RHOA,ARPC2,ARPC5,NRAS,ITGB1,GRB2,RRAS,RAC1
Regulation of Cellular Mechanics by Calpain Protease	8,15E00	2,63E-01	NaN	TLN1,VCL,CAPN1,EZR,ACTN1,TLN2,NRAS,ITGB1,MAPK1,GRB2,ACTN4,RRAS,CAPNS1,MAPK3,CAPN2
Germ Cell-Sertoli Cell Junction Signaling	7,96E00	1,56E-01	NaN	IQGAP1,CDC42,VCL,TUBB3,TUBB6,RHOC,TUBA1C,A2M,TUBA1A,CFL1,ACTG1,ITGB1,ACTN4,MAPK3,CTNNA1,TUBB,CTNNB1,ACTN1,CFL2,TUBB4B,RHOA,NRAS,MAPK1,RRAS,RAC1
ILK Signaling	7,84E00	1,45E-01	NaN	FLNB,CDC42,VCL,RSU1,RHOC,PARVA,MYH9,VIM,FN1,CFL1,ACTG1,PPP1R14B,ITGB1,PPP2R1A,FLNC,ACTN4,MAPK3,FERMT2,PPP1R12A,FLNA,CTNNB1,MYH10,ACTN1,MYL9,CFL2,RHOA,MAPK1
Axonal Guidance Signaling	7,77E00	1,04E-01	NaN	CDC42,GNA11,ACTR2,MMP2,TUBB3,TUBB6,GNB1,TUBA1C,ARPC1B,ARPC5,GNAI2,TUBA1A,CFL1,PFN1,COPS5,ITGB1,SEMA7A,PSMD14,GRB2,PLCB3,CRK,MAPK3,PRKAR2A,ARPC3,GNB2L1,TUBB,MYL12A,DPYSL2,MYL9,ACTR3,RTN4,CFL2,TUBB4B,RHOA,PRKAR1A,ARPC2,NRAS,GNAS,MAPK1,PDIA3,EIF4E,PRKACA,PFN2,RRAS,RAC1
Ephrin B Signaling	7,41E00	2,19E-01	NaN	CDC42,GNA11,GNB2L1,HNRNPK,CTNNB1,GNB1,CAP1,CFL2,RHOA,GNAI2,GNAS,CFL1,ACP1,MAPK1,RAC1,MAPK3
Rac Signaling	7,31E00	1,83E-01	NaN	IQGAP1,CDC42,ACTR2,ARPC3,ARPC1B,ACTR3,CD44,CFL2,PIP4K2A,RHOA,ARPC2,ARPC5,NRAS,CFL1,ITGB1,MAPK1,RRAS,RAC1,MAPK3
ERK/MAPK Signaling	7,18E00	1,39E-01	NaN	YWHAQ,PPP1R7,TLN2,YWHAH,PPP1R14B,STAT1,ITGB1,GRB2,PPP2R1A,CRK,YWHAB,PRKAR2A,MAPK3,YWHAG,TLN1,PPP1R12A,PRKAR1A,HSPB1,NRAS,MAPK1,PPP1CB,EIF4E,PRKACA,YWHAZ,RRAS,RAC1
IGF-1 Signaling	7,07E00	1,86E-01	NaN	YWHAQ,YWHAG,YWHAE,YWHAH,PRKAR1A,NRAS,IGFBP7,MAPK1,GRB2,IGFBP3,PRKACA,YWHAZ,CSNK2A1,RRAS,YWHAB,IGFBP6,PRKAR2A,MAPK3
Sertoli Cell-Sertoli Cell Junction Signaling	7,02E00	1,4E-01	NaN	CDC42,VCL,TUBB3,TUBB6,TUBA1C,SPTBN1,A2M,TUBA1A,ACTG1,ITGB1,ACTN4,MAPK3,PRKAR2A,CTNNA1,TUBB,CTNNB1,ACTN1,TUBB4B,PRKAR1A,NRAS,MAPK1,PRKACA,RRAS,RAC1,SPTAN1
NRF2-mediated Oxidative Stress Response	6,92E00	1,39E-01	NaN	FTL,NQO1,PRDX1,STIP1,GSTO1,CCT7,ACTG1,GSR,GSTP1,MAPK3,DNAJC10,CBR1,TXN,GSTM3,ERP29,PPIB,DNAJC8,NRAS,MAPK1,AKR1A1,UBE2K,VCP,GCLM,FTH1,RRAS
PI3K/AKT Signaling	6,79E00	1,63E-01	NaN	YWHAQ,YWHAG,CTNNB1,HSP90B1,CDC37,YWHAE,YWHAH,NRAS,ITGB1,MAPK1,GRB2,PPP2R1A,RHEB,EIF4E,HSP90AB1,YWHAZ,HSP90AA1,YWHAB,RRAS,MAPK3
Ephrin Receptor Signaling	6,61E00	1,38E-01	NaN	CDC42,ACTR2,GNA11,ARPC3,GNB2L1,GNB1,ARPC1B,ACTR3,CFL2,RHOA,ARPC2,ARPC5,NRAS,GNAI2,GNAS,CFL1,ACP1,ITGB1,MAPK1,GRB2,CRK,RRAS,RAC1,MAPK3
Glycolysis I	6,41E00	3,6E-01	NaN	PFKP,TPI1,PGAM1,PGK1,PKM,GAPDH,ALDOA,ENO1,PFKL
Gap Junction Signaling	6,33E00	1,42E-01	NaN	TUBB3,TUBB,CTNNB1,DBN1,TUBB6,TUBA1C,TUBB4B,PRKAR1A,NRAS,GNAI2,TUBA1A,CAV1,GNAS,ACTG1,MAPK1,GRB2,PLCB3,PDIA3,PRKACA,RRAS,PRKAR2A,MAPK3
CDK5 Signaling	6,21E00	1,72E-01	NaN	PPP1R12A,CAPN1,LAMB1,PPP1R7,LAMC1,PRKAR1A,NRAS,GNAS,PPP1R14B,ITGB1,MAPK1,PPP1CB,PPP2R1A,PRKACA,RRAS,PRKAR2A,MAPK3
Paxillin Signaling	6,08E00	1,68E-01	NaN	CDC42,TLN1,ITGAV,VCL,PARVA,ACTN1,TLN2,ARF1,NRAS,ACTG1,ITGB1,MAPK1,GRB2,CRK,ACTN4,RRAS,RAC1
Fcγ Receptor-mediated Phagocytosis in Macrophages and Monocytes	5,89E00	1,72E-01	NaN	CDC42,ACTR2,TLN1,ARPC3,EZR,TLN2,ARPC1B,ACTR3,ARPC2,ARPC5,ACTG1,MAPK1,CRK,RAB11B,RAC1,MAPK3
Aldosterone Signaling in Epithelial Cells	5,88E00	1,38E-01	NaN	DNAJC10,CRYAB,HSP90B1,HSPD1,HSPE1,PIP4K2A,HSPB1,DNAJC8,HSPA9,HSPA4,HSPA8,HSPA5,MAPK1,PLCB3,PDIA3,HSPH1,HSP90AB1,HSP90AA1,AHCY,MAPK3,HSPB6
Semaphorin Signaling in Neurons	5,87E00	2,26E-01	NaN	CFL1,ITGB1,DPYSL3,SEMA7A,MAPK1,ARHGAP1,RHOC,DPYSL2,RAC1,CFL2,RHOA,MAPK3
fMLP Signaling in Neutrophils	5,66E00	1,57E-01	NaN	CDC42,ACTR2,ARPC3,GNB2L1,GNB1,ARPC1B,ACTR3,ARPC2,ARPC5,NRAS,GNAI2,GNAS,MAPK1,PLCB3,RRAS,RAC1,MAPK3
Hypoxia Signaling in the Cardiovascular System	5,66E00	2E-01	NaN	UBE2L3,HSP90B1,UBE2V1,UBE2N,NQO1,UBE2D3,COPS5,UBE2I,UBE2V2,LDHA,HSP90AB1,HSP90AA1,P4HB
FAK Signaling	5,57E00	1,72E-01	NaN	TLN1,VCL,CAPN1,TLN2,NRAS,ACTG1,ITGB1,MAPK1,GRB2,CRK,RRAS,RAC1,CAPNS1,MAPK3,CAPN2
RAN Signaling	5,55E00	4,12E-01	NaN	CSE1L,XPO1,KPNA3,IPO5,RAN,KPNB1,TNPO1
Glioma Invasiveness Signaling	5,52E00	2,11E-01	NaN	NRAS,VTN,ITGAV,MMP2,MAPK1,RHOC,TIMP1,RRAS,CD44,TIMP2,RHOA,MAPK3
G Beta Gamma Signaling	5,51E00	1,7E-01	NaN	CDC42,GNA11,GNB2L1,GNB1,PRKAR1A,NRAS,GNAI2,CAV1,GNAS,MAPK1,GRB2,PRKACA,RRAS,PRKAR2A,MAPK3
Huntington's Disease Signaling	5,46E00	1,14E-01	NaN	GNA11,NAPA,GNB1,YKT6,CYCS,PSME3,HSPA8,GRB2,PLCB3,CTSD,ATP5B,CAPNS1,MAPK3,CAPN2,GNB2L1,CLTC,CAPN1,PSME1,HSPA4,HSPA9,CLTA,HSPA5,AP2A2,MAPK1,CLTB,BAX
Gluconeogenesis I	5,31E00	3,2E-01	NaN	PGAM1,PGK1,ME1,GAPDH,ALDOA,MDH2,ENO1,MDH1
Lipid Antigen Presentation by CD1	5,17E00	3,08E-01	NaN	AP2A2,AP2B1,AP2A1,PDIA3,CANX,PSAP,AP2M1,AP1B1
p70S6K Signaling	5,08E00	1,43E-01	NaN	YWHAQ,YWHAG,YWHAE,YWHAH,EEF2,NRAS,GNAI2,MAPK1,GRB2,PPP2R1A,PLCB3,PDIA3,YWHAZ,YWHAB,RRAS,BCAP31,MAPK3
HIPPO signaling	4,94E00	1,63E-01	NaN	YWHAQ,YWHAG,PPP1R12A,PPP1R7,YWHAE,YWHAH,CD44,PPP1R14B,SKP1,MOB1A,PPP1CB,PPP2R1A,YWHAZ,YWHAB
Tight Junction Signaling	4,68E00	1,2E-01	NaN	CTNNA1,CDC42,VCL,CTNNB1,NAPA,YKT6,MYH10,MYL9,MYH9,RHOA,PRKAR1A,RAB13,ACTG1,PPP2R1A,VAPA,PRKACA,RAC1,PRKAR2A,NUDT21,SPTAN1
Myc Mediated Apoptosis Signaling	4,65E00	1,9E-01	NaN	YWHAQ,NRAS,YWHAG,GRB2,BAX,CYCS,YWHAE,YWHAZ,YWHAH,YWHAB,RRAS
Acute Phase Response Signaling	4,61E00	1,18E-01	NaN	FTL,C3,SERPINF1,HNRNPK,ITIH3,C5,RBP4,A2M,NRAS,C4A/C4B,FN1,MAPK1,GRB2,APOA1,SERPINE1,AHSG,SERPING1,RRAS,ALB,MAPK3
Hepatic Fibrosis / Hepatic Stellate Cell Activation	4,6E00	1,15E-01	NaN	PDGFRB,MMP2,COL6A3,COL6A1,COL3A1,COL1A2,MYH10,FGF2,MYL9,COL1A1,COL6A2,TIMP2,MYH9,A2M,COL12A1,FN1,STAT1,IGFBP3,BAX,TIMP1,SERPINE1
VEGF Signaling	4,6E00	1,52E-01	NaN	EIF2S1,VCL,ACTN1,YWHAE,NRAS,EIF2S3,ACTG1,MAPK1,GRB2,EIF2B1,ELAVL1,ACTN4,RRAS,MAPK3
Leukocyte Extravasation Signaling	4,57E00	1,11E-01	NaN	CTNNA1,CDC42,MMP2,VCL,CTNNB1,EZR,MSN,ARHGAP1,ACTN1,THY1,CD44,RDX,TIMP2,RHOA,GNAI2,ACTG1,ITGB1,MAPK1,CRK,TIMP1,ACTN4,RAC1
Renal Cell Carcinoma Signaling	4,49E00	1,69E-01	NaN	TCEB2,NRAS,CDC42,FH,TCEB1,MAPK1,GRB2,CRK,RRAS,RAC1,CUL2,MAPK3
Protein Kinase A Signaling	4,49E00	8,81E-02	NaN	FLNB,YWHAQ,ADD1,PPP1R7,GNB1,CAMK2D,YWHAE,YWHAH,GNAI2,PYGB,PPP1R14B,PLCB3,FLNC,YWHAB,MAPK3,PRKAR2A,YWHAG,PYGL,GNB2L1,PPP1R12A,FLNA,CTNNB1,MYL12A,MYH10,MYL9,RHOA,PRKAR1A,GNAS,ACP1,MAPK1,PPP1CB,PDIA3,PRKACA,YWHAZ
UDP-N-acetyl-D-glucosamine Biosynthesis II	4,38E00	6,67E-01	NaN	UAP1,GFPT1,PGM3,GNPNAT1
Pentose Phosphate Pathway	4,34E00	4,55E-01	NaN	TKT,PGD,G6PD,PGLS,TALDO1
PPARα/RXRα Activation	4,25E00	1,12E-01	NaN	GNA11,HSP90B1,FASN,PRKAR1A,NRAS,GNAS,AP2A2,MAPK1,GRB2,APOA1,PLCB3,PDIA3,CAND1,CKAP5,HSP90AB1,PRKACA,HSP90AA1,RRAS,PRKAR2A,MAPK3
Cardiac Hypertrophy Signaling	4,24E00	1,03E-01	NaN	GNA11,GNB2L1,MYL12A,GNB1,RHOC,MYL9,ADSS,RHOA,PRKAR1A,HSPB1,NRAS,GNAI2,GNAS,MAPK1,GRB2,EIF2B1,PLCB3,PDIA3,EIF4E,PRKACA,RRAS,PRKAR2A,MAPK3
α-Adrenergic Signaling	4,23E00	1,49E-01	NaN	PYGL,GNB2L1,GNB1,PRKAR1A,NRAS,GNAI2,GNAS,PYGB,MAPK1,PRKACA,RRAS,PRKAR2A,MAPK3
CTLA4 Signaling in Cytotoxic T Lymphocytes	4,18E00	1,48E-01	NaN	AP1G1,AP1S1,CLTC,AP2B1,AP1B1,HLA-A,CLTA,AP2A2,GRB2,PPP2R1A,AP2A1,CLTB,AP2M1
PAK Signaling	4,12E00	1,46E-01	NaN	CDC42,PDGFRB,MYL12A,MYL9,CFL2,NRAS,CFL1,ITGB1,MAPK1,GRB2,RRAS,RAC1,MAPK3
Glycogen Degradation III	4,12E00	4,17E-01	NaN	PGM1,PYGB,PYGL,PGM3,GAA
CCR3 Signaling in Eosinophils	4E00	1,28E-01	NaN	GNB2L1,PPP1R12A,GNB1,CFL2,RHOA,NRAS,GNAI2,GNAS,CFL1,MAPK1,PPP1CB,PLCB3,RRAS,RAC1,MAPK3
Synaptic Long Term Potentiation	3,91E00	1,26E-01	NaN	GNA11,PPP1R12A,PPP1R7,CAMK2D,PRKAR1A,NRAS,PPP1R14B,MAPK1,PPP1CB,PLCB3,PDIA3,PRKACA,RRAS,PRKAR2A,MAPK3
Insulin Receptor Signaling	3,85E00	1,19E-01	NaN	PPP1R12A,PPP1R7,PRKAR1A,NRAS,PPP1R14B,MAPK1,GRB2,PPP1CB,ACLY,EIF2B1,CRK,EIF4E,PRKACA,RRAS,PRKAR2A,MAPK3
Chemokine Signaling	3,81E00	1,55E-01	NaN	GNAI2,NRAS,CFL1,PPP1R12A,CAMK2D,MAPK1,PPP1CB,PLCB3,RRAS,RHOA,MAPK3
Isoleucine Degradation I	3,75E00	3,57E-01	NaN	HSD17B10,DLD,ACAT2,ACAT1,ECHS1
Cdc42 Signaling	3,68E00	1,08E-01	NaN	IQGAP1,CDC42,ACTR2,ARPC3,PPP1R12A,MYL12A,MYL9,ARPC1B,ACTR3,CFL2,ARPC2,ARPC5,CFL1,HLA-A,ITGB1,RALA,MAPK1,PPP1CB
Amyloid Processing	3,65E00	1,76E-01	NaN	CAPN1,MAPK1,PRKACA,CSNK2A1,CAPNS1,MAPK3,PRKAR2A,CAPN2,PRKAR1A
Glutathione Redox Reactions II	3,56E00	7,5E-01	NaN	GSR,PDIA3,TXNDC12
TCA Cycle II (Eukaryotic)	3,56E00	2,61E-01	NaN	DLD,FH,ACO2,ACO1,MDH2,MDH1
GNRH Signaling	3,52E00	1,16E-01	NaN	CDC42,GNA11,CAMK2D,PRKAR1A,NRAS,GNAI2,GNAS,MAPK1,GRB2,PLCB3,PRKACA,RRAS,RAC1,PRKAR2A,MAPK3
UDP-N-acetyl-D-galactosamine Biosynthesis II	3,5E00	4,44E-01	NaN	UAP1,PGM3,HK1,GNPNAT1
PDGF Signaling	3,49E00	1,43E-01	NaN	NRAS,CAV1,PDGFRB,ACP1,STAT1,MAPK1,GRB2,CRK,CSNK2A1,RRAS,MAPK3
Unfolded protein response	3,46E00	1,67E-01	NaN	HSPA4,HSPA9,HSPA8,HSP90B1,HSPA5,CANX,HSPH1,VCP,P4HB
Thrombin Signaling	3,41E00	9,95E-02	NaN	GNA11,GNB2L1,PPP1R12A,MYL12A,GNB1,CAMK2D,RHOC,MYL9,RHOA,NRAS,GNAI2,GNAS,MAPK1,GRB2,PPP1CB,PLCB3,PDIA3,RRAS,MAPK3
Gαi Signaling	3,34E00	1,17E-01	NaN	GNB2L1,GNB1,PRKAR1A,NRAS,GNAI2,CAV1,GNAS,RALA,MAPK1,GRB2,PRKACA,RRAS,PRKAR2A,MAPK3
Glycogen Degradation II	3,3E00	4E-01	NaN	PGM1,PYGB,PYGL,PGM3
Agrin Interactions at Neuromuscular Junction	3,27E00	1,45E-01	NaN	NRAS,CDC42,ACTG1,ITGB1,LAMB1,LAMC1,MAPK1,RRAS,RAC1,MAPK3
Prostate Cancer Signaling	3,25E00	1,34E-01	NaN	NRAS,CTNNB1,HSP90B1,MAPK1,GRB2,PA2G4,HSP90AB1,GSTP1,HSP90AA1,RRAS,MAPK3
CXCR4 Signaling	3,23E00	1,05E-01	NaN	GNA11,GNB2L1,MYL12A,GNB1,RHOC,MYL9,RHOA,NRAS,GNAI2,GNAS,MAPK1,PLCB3,CRK,RRAS,RAC1,MAPK3
Role of Tissue Factor in Cancer	3,2E00	1,18E-01	NaN	CDC42,GNA11,ITGAV,CFL2,NRAS,CFL1,ITGB1,MAPK1,EIF4E,RRAS,RAC1,P4HB,MAPK3
Pentose Phosphate Pathway (Oxidative Branch)	3,17E00	6E-01	NaN	PGD,G6PD,PGLS
Serine Biosynthesis	3,17E00	6E-01	NaN	PSAT1,PSPH,PHGDH
IL-8 Signaling	3,17E00	9,78E-02	NaN	IQGAP1,MMP2,ITGAV,GNB2L1,CSTB,GNB1,RHOC,MYL9,LASP1,RHOA,NRAS,GNAI2,GNAS,MAPK1,BAX,RRAS,RAC1,MAPK3
Purine Nucleotides De Novo Biosynthesis II	3,11E00	3,64E-01	NaN	PAICS,GMPS,ATIC,ADSS
Phospholipase C Signaling	3,03E00	8,86E-02	NaN	PEBP1,GNB2L1,PPP1R12A,MYL12A,GNB1,RHOC,MYL9,RHOA,NRAS,GNAS,ITGB1,RALA,MAPK1,GRB2,PPP1CB,PLCB3,RRAS,RAC1,MARCKS,AHNAK,MAPK3
Neuregulin Signaling	2,99E00	1,25E-01	NaN	NRAS,ITGB1,HSP90B1,MAPK1,GRB2,DCN,CRK,HSP90AB1,HSP90AA1,RRAS,MAPK3
HIF1α Signaling	2,98E00	1,18E-01	NaN	TCEB2,NRAS,COPS5,MMP2,LDHA,TCEB1,MAPK1,HSP90AA1,RRAS,CUL2,MAPK3,LDHB
Apoptosis Signaling	2,95E00	1,24E-01	NaN	NRAS,CAPN1,MAPK1,BAX,CYCS,RRAS,CAPNS1,LMNA,MAPK3,CAPN2,SPTAN1
Neuroprotective Role of THOP1 in Alzheimer's Disease	2,93E00	1,75E-01	NaN	HLA-A,IDE,KNG1,PRKACA,YWHAE,PRKAR2A,PRKAR1A
P2Y Purigenic Receptor Signaling Pathway	2,87E00	1,09E-01	NaN	GNB2L1,GNB1,PRKAR1A,NRAS,GNAI2,GNAS,MAPK1,PLCB3,PDIA3,PRKACA,RRAS,PRKAR2A,MAPK3
Mechanisms of Viral Exit from Host Cells	2,87E00	1,71E-01	NaN	SH3GL1,XPO1,ACTG1,LMNB1,LMNB2,PDCD6IP,VPS25
Dopamine Receptor Signaling	2,85E00	1,28E-01	NaN	GNAS,PPP1R12A,PPP1R14B,PPP1R7,PPP2R1A,PPP1CB,SPR,PRKACA,PRKAR2A,PRKAR1A
LXR/RXR Activation	2,81E00	1,07E-01	NaN	C3,SERPINF1,FASN,RBP4,C4A/C4B,VTN,CLU,KNG1,APOA1,APOE,AHSG,ECHS1,ALB
Guanine and Guanosine Salvage I	2,76E00	1E00	NaN	PNP,HPRT1
Adenine and Adenosine Salvage I	2,76E00	1E00	NaN	PNP,APRT
Formaldehyde Oxidation II (Glutathione-dependent)	2,76E00	1E00	NaN	ADH5,ESD
CREB Signaling in Neurons	2,68E00	9,36E-02	NaN	GNA11,GNB2L1,GNB1,CAMK2D,PRKAR1A,NRAS,GNAI2,GNAS,MAPK1,GRB2,PLCB3,PDIA3,PRKACA,RRAS,PRKAR2A,MAPK3
Superpathway of Serine and Glycine Biosynthesis I	2,66E00	4,29E-01	NaN	PSAT1,PSPH,PHGDH
GDP-glucose Biosynthesis	2,66E00	4,29E-01	NaN	PGM1,PGM3,HK1
Androgen Signaling	2,66E00	1,08E-01	NaN	GNAI2,HSPA4,GNAS,GNA11,GNB2L1,GNB1,MAPK1,PRKACA,HSP90AA1,MAPK3,PRKAR2A,PRKAR1A
Melatonin Signaling	2,63E00	1,29E-01	NaN	GNAI2,CAMK2D,MAPK1,PLCB3,PDIA3,PRKACA,MAPK3,PRKAR2A,PRKAR1A
Amyotrophic Lateral Sclerosis Signaling	2,61E00	1,12E-01	NaN	RAB5C,RAB5B,CAPN1,RAB5A,BAX,CYCS,SSR4,PRPH,RAC1,CAPNS1,CAPN2
Melanocyte Development and Pigmentation Signaling	2,61E00	1,19E-01	NaN	NRAS,GNAS,MAPK1,GRB2,CRK,PRKACA,RRAS,MAPK3,PRKAR2A,PRKAR1A
Oncostatin M Signaling	2,6E00	1,76E-01	NaN	NRAS,STAT1,MAPK1,GRB2,RRAS,MAPK3
Cellular Effects of Sildenafil (Viagra)	2,56E00	1,01E-01	NaN	PPP1R12A,MYL12A,MYH10,MYL9,MYH9,PRKAR1A,GNAS,ACTG1,PPP1CB,PLCB3,PDIA3,PRKACA,PRKAR2A
Chondroitin Sulfate Degradation (Metazoa)	2,55E00	2,67E-01	NaN	HEXB,GM2A,CD44,ARSB
Glucose and Glucose-1-phosphate Degradation	2,47E00	3,75E-01	NaN	PGM1,PGM3,HK1
Leptin Signaling in Obesity	2,46E00	1,22E-01	NaN	GNAS,MAPK1,GRB2,PLCB3,PDIA3,PRKACA,MAPK3,PRKAR2A,PRKAR1A
Production of Nitric Oxide and Reactive Oxygen Species in Macrophages	2,46E00	8,89E-02	NaN	PPP1R12A,PPP1R7,RHOC,RBP4,RHOA,PPP1R14B,STAT1,CLU,MAPK1,PPP1CB,PPP2R1A,APOA1,APOE,RAC1,ALB,MAPK3
Methylglyoxal Degradation III	2,44E00	2,5E-01	NaN	AKR1C3,AKR1B1,AKR1A1,AKR1C1/AKR1C2
Antigen Presentation Pathway	2,41E00	1,62E-01	NaN	PSMB6,HLA-A,PDIA3,CANX,PSMB5,PSMB9
Cell Cycle: G2/M DNA Damage Checkpoint Regulation	2,41E00	1,43E-01	NaN	YWHAQ,YWHAG,SKP1,YWHAE,YWHAZ,YWHAH,YWHAB
GM-CSF Signaling	2,4E00	1,29E-01	NaN	NRAS,GNB2L1,STAT1,CAMK2D,MAPK1,GRB2,RRAS,MAPK3
BMP signaling pathway	2,38E00	1,18E-01	NaN	NRAS,MAPK1,GRB2,PRKACA,RRAS,MAPK3,PRKAR2A,GREM1,PRKAR1A
ERK5 Signaling	2,36E00	1,27E-01	NaN	YWHAQ,NRAS,YWHAG,YWHAE,YWHAZ,YWHAH,YWHAB,RRAS
Colorectal Cancer Metastasis Signaling	2,34E00	8,05E-02	NaN	MMP2,GNB2L1,CTNNB1,GNB1,RHOC,RHOA,PRKAR1A,NRAS,GNAS,STAT1,MAPK1,GRB2,LRP1,BAX,PRKACA,RRAS,RAC1,PRKAR2A,MAPK3
Sucrose Degradation V (Mammalian)	2,3E00	3,33E-01	NaN	TKFC,TPI1,ALDOA
Ketolysis	2,3E00	3,33E-01	NaN	ACAT2,ACAT1,BDH2
Inosine-5'-phosphate Biosynthesis II	2,3E00	6,67E-01	NaN	PAICS,ATIC
Oxidized GTP and dGTP Detoxification	2,3E00	6,67E-01	NaN	RUVBL2,DDX6
Inhibition of Matrix Metalloproteases	2,29E00	1,54E-01	NaN	A2M,MMP2,HSPG2,LRP1,TIMP1,TIMP2
Endometrial Cancer Signaling	2,26E00	1,35E-01	NaN	CTNNA1,NRAS,CTNNB1,MAPK1,GRB2,RRAS,MAPK3
Molecular Mechanisms of Cancer	2,26E00	7,12E-02	NaN	CDC42,GNA11,CAMK2D,RHOC,CYCS,GNAI2,ITGB1,GRB2,PLCB3,LRP1,PA2G4,CRK,MAPK3,PRKAR2A,CTNNA1,CTNNB1,RHOA,PRKAR1A,NRAS,GNAS,RALA,MAPK1,BAX,PRKACA,RRAS,RAC1
Glucocorticoid Receptor Signaling	2,26E00	7,64E-02	NaN	HSP90B1,YWHAH,ANXA1,A2M,NRAS,HSPA9,HSPA4,HMGB1,HSPA8,STAT1,UBE2I,HSPA5,MAPK1,GRB2,SERPINE1,HSP90AB1,PRKACA,HSP90AA1,RRAS,RAC1,MAPK3
Aryl Hydrocarbon Receptor Signaling	2,25E00	9,29E-02	NaN	HSP90B1,GSTM3,NQO1,HSPB1,GSTO1,MAPK1,BAX,HSP90AB1,GSTP1,CTSD,ALDH1A3,HSP90AA1,MAPK3
Renin-Angiotensin Signaling	2,25E00	1,01E-01	NaN	NRAS,GNAS,STAT1,MAPK1,GRB2,PRKACA,RRAS,RAC1,MAPK3,PRKAR2A,PRKAR1A
eNOS Signaling	2,2E00	9,15E-02	NaN	HSP90B1,PRKAR1A,HSPA4,HSPA9,CAV1,GNAS,HSPA8,KNG1,HSPA5,HSP90AB1,PRKACA,HSP90AA1,PRKAR2A
Intrinsic Prothrombin Activation Pathway	2,2E00	1,72E-01	NaN	KNG1,COL3A1,COL1A2,COL1A1,SERPINC1
Pyrimidine Ribonucleotides Interconversion	2,2E00	1,72E-01	NaN	NUDT5,CMPK1,NME1,DDX3X,AK1
FXR/RXR Activation	2,18E00	9,45E-02	NaN	C4A/C4B,VTN,C3,SERPINF1,CLU,KNG1,APOA1,FASN,APOE,RBP4,AHSG,ALB
Ketogenesis	2,16E00	3E-01	NaN	ACAT2,ACAT1,BDH2
Cysteine Biosynthesis III (mammalia)	2,16E00	2,11E-01	NaN	CBS/CBSL,MAT2A,AHCY,PRMT1
GDNF Family Ligand-Receptor Interactions	2,16E00	1,18E-01	NaN	NRAS,CDC42,PDLIM7,MAPK1,GRB2,RRAS,RAC1,MAPK3
Macropinocytosis Signaling	2,16E00	1,18E-01	NaN	NRAS,CDC42,ITGB1,RAB5A,ACTN4,RRAS,RAC1,RHOA
Role of NFAT in Cardiac Hypertrophy	2,11E00	8,38E-02	NaN	GNB2L1,GNB1,CAMK2D,PRKAR1A,NRAS,GNAI2,GNAS,MAPK1,GRB2,PLCB3,PDIA3,PRKACA,RRAS,PRKAR2A,MAPK3
Glioblastoma Multiforme Signaling	2,1E00	8,9E-02	NaN	CDC42,PDGFRB,CTNNB1,RHOC,RHOA,NRAS,MAPK1,GRB2,PLCB3,PDIA3,RRAS,RAC1,MAPK3
Pyrimidine Ribonucleotides De Novo Biosynthesis	2,07E00	1,61E-01	NaN	NUDT5,CMPK1,NME1,DDX3X,AK1
Systemic Lupus Erythematosus Signaling	2,07E00	7,91E-02	NaN	SNRPE,C5,HNRNPC,LSM1,PRPF19,SNRPD2,NRAS,HLA-A,KNG1,MAPK1,GRB2,SNRPA,EFTUD2,SNRPD3,HNRNPA2B1,RRAS,MAPK3
Nitric Oxide Signaling in the Cardiovascular System	2,07E00	1E-01	NaN	CAV1,KNG1,HSP90B1,MAPK1,HSP90AB1,PRKACA,HSP90AA1,MAPK3,PRKAR2A,PRKAR1A
GPCR-Mediated Integration of Enteroendocrine Signaling Exemplified by an L Cell	2,05E00	1,13E-01	NaN	GNAI2,GNAS,GNA11,PLCB3,PDIA3,PRKACA,PRKAR2A,PRKAR1A
Fatty Acid β-oxidation I	2,02E00	1,56E-01	NaN	ECI1,ACAA2,HSD17B10,SCP2,ECHS1
Superpathway of Methionine Degradation	2,02E00	1,56E-01	NaN	DLD,CBS/CBSL,MAT2A,AHCY,PRMT1
Arsenate Detoxification I (Glutaredoxin)	2,01E00	5E-01	NaN	GSTO1,PNP
Heme Degradation	2,01E00	5E-01	NaN	BLVRB,BLVRA
PTEN Signaling	2E00	9,32E-02	NaN	NRAS,CDC42,PDGFRB,ITGB1,MAPK1,GRB2,CSNK2A1,YWHAH,RRAS,RAC1,MAPK3
HMGB1 Signaling	1,95E00	9,17E-02	NaN	NRAS,CDC42,HMGB1,MAPK1,RHOC,RBBP7,SERPINE1,RRAS,RAC1,RHOA,MAPK3
Glutaryl-CoA Degradation	1,93E00	2,5E-01	NaN	HSD17B10,ACAT2,ACAT1
Pyrimidine Deoxyribonucleotides De Novo Biosynthesis I	1,93E00	1,82E-01	NaN	DUT,CMPK1,NME1,AK1
Mitochondrial Dysfunction	1,92E00	8,19E-02	NaN	HSD17B10,VDAC1,PARK7,ACO2,CYCS,PRDX3,CYB5R3,PRDX5,VDAC2,GSR,ATP5A1,ACO1,MT-CO2,ATP5B
IL-1 Signaling	1,88E00	9,89E-02	NaN	GNAI2,GNAS,GNA11,GNB2L1,GNB1,MAPK1,PRKACA,PRKAR2A,PRKAR1A
NGF Signaling	1,87E00	9,35E-02	NaN	NRAS,CDC42,MAPK1,GRB2,CRK,BAX,RRAS,RAC1,RHOA,MAPK3
Bile Acid Biosynthesis, Neutral Pathway	1,83E00	2,31E-01	NaN	AKR1C3,AKR1C1/AKR1C2,SCP2
Guanosine Nucleotides Degradation III	1,83E00	2,31E-01	NaN	PNP,NT5C,NT5E
Sphingosine-1-phosphate Signaling	1,82E00	9,17E-02	NaN	GNAI2,PDGFRB,GNAS,MAPK1,PLCB3,RHOC,PDIA3,RAC1,RHOA,MAPK3
CMP-N-acetylneuraminate Biosynthesis I (Eukaryotes)	1,8E00	4E-01	NaN	NANS,NAGK
PPAR Signaling	1,79E00	9,57E-02	NaN	NRAS,PDGFRB,HSP90B1,MAPK1,GRB2,HSP90AB1,HSP90AA1,RRAS,MAPK3
Urate Biosynthesis/Inosine 5'-phosphate Degradation	1,74E00	2,14E-01	NaN	PNP,NT5C,NT5E
CNTF Signaling	1,7E00	1,15E-01	NaN	NRAS,STAT1,MAPK1,GRB2,RRAS,MAPK3
Ovarian Cancer Signaling	1,69E00	8,4E-02	NaN	NRAS,MMP2,CTNNB1,MAPK1,PA2G4,PRKACA,RRAS,CD44,MAPK3,PRKAR2A,PRKAR1A
Telomerase Signaling	1,66E00	9,09E-02	NaN	NRAS,HSP90B1,PPP2R1A,MAPK1,GRB2,HSP90AB1,HSP90AA1,RRAS,MAPK3
IL-2 Signaling	1,66E00	1,13E-01	NaN	NRAS,MAPK1,GRB2,CSNK2A1,RRAS,MAPK3
Telomere Extension by Telomerase	1,65E00	2E-01	NaN	XRCC6,XRCC5,HNRNPA2B1
Cardiac β-adrenergic Signaling	1,64E00	8,27E-02	NaN	GNAS,PPP1R12A,GNB2L1,PPP1R14B,PPP1R7,GNB1,PPP2R1A,PPP1CB,PRKACA,PRKAR2A,PRKAR1A
Arginine Biosynthesis IV	1,64E00	3,33E-01	NaN	GLUD1,ASS1
Pyruvate Fermentation to Lactate	1,64E00	3,33E-01	NaN	LDHA,LDHB
Pentose Phosphate Pathway (Non-oxidative Branch)	1,64E00	3,33E-01	NaN	TKT,TALDO1
Glycogen Biosynthesis II (from UDP-D-Glucose)	1,64E00	3,33E-01	NaN	GBE1,UGP2
GPCR-Mediated Nutrient Sensing in Enteroendocrine Cells	1,63E00	9,52E-02	NaN	GNAI2,GNAS,GNA11,PLCB3,PDIA3,PRKACA,PRKAR2A,PRKAR1A
Gα12/13 Signaling	1,62E00	8,55E-02	NaN	NRAS,CDC42,CTNNB1,MYL12A,MAPK1,MYL9,CDH11,RRAS,RHOA,MAPK3
Thyroid Cancer Signaling	1,62E00	1,25E-01	NaN	NRAS,CTNNB1,MAPK1,RRAS,MAPK3
TR/RXR Activation	1,61E00	9,41E-02	NaN	PFKP,AKR1C3,COL6A3,FASN,ME1,AKR1C1/AKR1C2,ENO1,RAB3B
Thrombopoietin Signaling	1,59E00	1,09E-01	NaN	NRAS,STAT1,MAPK1,GRB2,RRAS,MAPK3
Granzyme B Signaling	1,57E00	1,88E-01	NaN	LMNB1,CYCS,LMNB2
Dermatan Sulfate Degradation (Metazoa)	1,57E00	1,88E-01	NaN	HEXB,GM2A,CD44
Parkinson's Signaling	1,57E00	1,88E-01	NaN	PARK7,MAPK1,CYCS
Superpathway of Cholesterol Biosynthesis	1,56E00	1,43E-01	NaN	LSS,FDPS,ACAT2,ACAT1
RAR Activation	1,56E00	7,37E-02	NaN	RPL7A,RBP4,PRMT1,PRKAR1A,AKR1C3,GNAS,PSMC5,MAPK1,IGFBP3,PRKACA,ALDH1A3,CSNK2A1,RAC1,PRKAR2A
IL-3 Signaling	1,56E00	9,86E-02	NaN	NRAS,STAT1,MAPK1,GRB2,RRAS,RAC1,MAPK3
PEDF Signaling	1,56E00	9,86E-02	NaN	NRAS,SERPINF1,MAPK1,RRAS,RAC1,RHOA,MAPK3
Bladder Cancer Signaling	1,55E00	9,2E-02	NaN	NRAS,MMP2,MAPK1,PA2G4,FGF2,THBS1,RRAS,MAPK3
UVA-Induced MAPK Signaling	1,53E00	9,09E-02	NaN	NRAS,STAT1,MAPK1,PLCB3,PDIA3,CYCS,RRAS,MAPK3
Glutathione-mediated Detoxification	1,51E00	1,38E-01	NaN	GSTO1,GSTM3,ANPEP,GSTP1
Adenosine Nucleotides Degradation II	1,5E00	1,76E-01	NaN	PNP,NT5C,NT5E
Methionine Degradation I (to Homocysteine)	1,5E00	1,76E-01	NaN	MAT2A,AHCY,PRMT1
Superpathway of Geranylgeranyldiphosphate Biosynthesis I (via Mevalonate)	1,5E00	1,76E-01	NaN	FDPS,ACAT2,ACAT1
Adenine and Adenosine Salvage III	1,5E00	2,86E-01	NaN	PNP,HPRT1
Aspartate Degradation II	1,5E00	2,86E-01	NaN	MDH2,MDH1
FLT3 Signaling in Hematopoietic Progenitor Cells	1,47E00	9,46E-02	NaN	NRAS,STAT1,MAPK1,GRB2,EIF4E,RRAS,MAPK3
Synaptic Long Term Depression	1,46E00	7,75E-02	NaN	PRDX6,GNAI2,NRAS,GNAS,GNA11,PPP2R1A,MAPK1,PLCB3,PDIA3,RRAS,MAPK3
Calcium Signaling	1,46E00	7,3E-02	NaN	TPM4,CAMK2D,MYH10,MYL9,MYH9,PRKAR1A,TPM3,MAPK1,TPM2,TPM1,PRKACA,PRKAR2A,MAPK3
AMPK Signaling	1,44E00	7,26E-02	NaN	PFKP,FASN,EEF2,PRKAR1A,AK3,GNAS,PPP2R1A,MAPK1,ELAVL1,PRKACA,AK1,PRKAR2A,PFKL
Dopamine-DARPP32 Feedback in cAMP Signaling	1,44E00	7,45E-02	NaN	GNAI2,GNAS,PPP1R12A,PPP1R14B,PPP1R7,PPP2R1A,PPP1CB,PLCB3,PDIA3,PRKACA,PRKAR2A,PRKAR1A
Gαs Signaling	1,43E00	8,26E-02	NaN	GNAS,ADD1,GNB2L1,GNB1,MAPK1,PRKACA,MAPK3,PRKAR2A,PRKAR1A
phagosome formation	1,43E00	8,26E-02	NaN	FN1,VTN,ITGB1,MRC2,PLCB3,RHOC,PDIA3,MARCKS,RHOA
PI3K Signaling in B Lymphocytes	1,39E00	7,81E-02	NaN	NRAS,C3,CAMK2D,MAPK1,PLCB3,PDIA3,RRAS,RAC1,CD81,MAPK3
Superoxide Radicals Degradation	1,39E00	2,5E-01	NaN	CYGB,NQO1
Corticotropin Releasing Hormone Signaling	1,38E00	8,11E-02	NaN	ARPC5,GNAI2,GNAS,KRT1,MAPK1,PRKACA,MAPK3,PRKAR2A,PRKAR1A
SAPK/JNK Signaling	1,38E00	8,51E-02	NaN	NRAS,CDC42,HNRNPK,GNB1,GRB2,CRK,RRAS,RAC1
Acetyl-CoA Biosynthesis III (from Citrate)	1,38E00	1E00	NaN	ACLY
Xanthine and Xanthosine Salvage	1,38E00	1E00	NaN	PNP
Asparagine Biosynthesis I	1,38E00	1E00	NaN	ASNS
Adenine and Adenosine Salvage VI	1,38E00	1E00	NaN	ADK
Lanosterol Biosynthesis	1,38E00	1E00	NaN	LSS
Glioma Signaling	1,36E00	8,42E-02	NaN	NRAS,PDGFRB,CAMK2D,MAPK1,GRB2,PA2G4,RRAS,MAPK3
Antiproliferative Role of Somatostatin Receptor 2	1,34E00	9,52E-02	NaN	NRAS,GNB2L1,GNB1,MAPK1,RRAS,MAPK3
Estrogen-Dependent Breast Cancer Signaling	1,34E00	9,52E-02	NaN	NRAS,HSD17B10,MAPK1,HSD17B12,RRAS,MAPK3
Role of JAK1 and JAK3 in γc Cytokine Signaling	1,34E00	9,52E-02	NaN	NRAS,STAT1,MAPK1,GRB2,RRAS,MAPK3
G Protein Signaling Mediated by Tubby	1,33E00	1,21E-01	NaN	GNAS,GNB2L1,GNB1,PLCB3
Ephrin A Signaling	1,32E00	1,04E-01	NaN	CDC42,CFL1,RAC1,CFL2,RHOA
Purine Nucleotides Degradation II (Aerobic)	1,32E00	1,5E-01	NaN	PNP,NT5C,NT5E
IL-6 Signaling	1,28E00	7,76E-02	NaN	A2M,HSPB1,NRAS,MAPK1,GRB2,COL1A1,CSNK2A1,RRAS,MAPK3
Non-Small Cell Lung Cancer Signaling	1,28E00	9,23E-02	NaN	NRAS,MAPK1,GRB2,PA2G4,RRAS,MAPK3
Role of NFAT in Regulation of the Immune Response	1,27E00	7,02E-02	NaN	GNAI2,NRAS,XPO1,GNAS,GNA11,GNB2L1,GNB1,MAPK1,GRB2,PLCB3,RRAS,MAPK3
Tryptophan Degradation III (Eukaryotic)	1,27E00	1,43E-01	NaN	HSD17B10,ACAT2,ACAT1
Endoplasmic Reticulum Stress Pathway	1,27E00	1,43E-01	NaN	EIF2S1,HSP90B1,HSPA5
Relaxin Signaling	1,26E00	7,41E-02	NaN	GNAI2,GNAS,GNA11,GNB2L1,GNB1,MAPK1,PRKACA,MAPK3,PRKAR2A,PRKAR1A
Coagulation System	1,25E00	1,14E-01	NaN	A2M,KNG1,SERPINE1,SERPINC1
Ethanol Degradation II	1,25E00	1,14E-01	NaN	HSD17B10,ADH5,AKR1A1,ALDH1A3
Neuropathic Pain Signaling In Dorsal Horn Neurons	1,25E00	8E-02	NaN	CAMK2D,MAPK1,PLCB3,PDIA3,PRKACA,MAPK3,PRKAR2A,PRKAR1A
CD28 Signaling in T Helper Cells	1,24E00	7,63E-02	NaN	ARPC2,ARPC5,CDC42,ACTR2,ARPC3,GRB2,ACTR3,ARPC1B,RAC1
Cholecystokinin/Gastrin-mediated Signaling	1,23E00	7,92E-02	NaN	NRAS,MAPK1,GRB2,PLCB3,RHOC,RRAS,RHOA,MAPK3
GABA Receptor Signaling	1,23E00	8,96E-02	NaN	GNAS,AP2A2,AP2B1,AP2A1,AP2M1,AP1B1
Neurotrophin/TRK Signaling	1,23E00	8,96E-02	NaN	NRAS,CDC42,MAPK1,GRB2,RRAS,MAPK3
Polyamine Regulation in Colon Cancer	1,21E00	1,36E-01	NaN	CTNNB1,PSME1,PSME3
Sperm Motility	1,19E00	7,44E-02	NaN	PRDX6,TWF1,GNAS,PLCB3,PDIA3,PRKACA,PTK7,PRKAR2A,PRKAR1A
Complement System	1,18E00	1,08E-01	NaN	C4A/C4B,C3,C5,SERPING1
Role of MAPK Signaling in the Pathogenesis of Influenza	1,18E00	8,7E-02	NaN	PRDX6,NRAS,MAPK1,BAX,RRAS,MAPK3
TGF-β Signaling	1,16E00	8,05E-02	NaN	NRAS,CDC42,MAPK1,GRB2,SERPINE1,RRAS,MAPK3
HGF Signaling	1,15E00	7,62E-02	NaN	NRAS,CDC42,ITGB1,MAPK1,GRB2,RRAS,RAC1,MAPK3
Noradrenaline and Adrenaline Degradation	1,15E00	1,05E-01	NaN	HSD17B10,ADH5,AKR1A1,ALDH1A3
Atherosclerosis Signaling	1,14E00	7,26E-02	NaN	PRDX6,CLU,COL3A1,APOA1,COL1A2,APOE,COL1A1,RBP4,ALB
Pancreatic Adenocarcinoma Signaling	1,13E00	7,55E-02	NaN	CDC42,STAT1,RALA,MAPK1,GRB2,PA2G4,RAC1,MAPK3
IL-22 Signaling	1,12E00	1,25E-01	NaN	STAT1,MAPK1,MAPK3
Netrin Signaling	1,11E00	1,03E-01	NaN	PRKACA,RAC1,PRKAR2A,PRKAR1A
JAK/Stat Signaling	1,11E00	8,33E-02	NaN	NRAS,STAT1,MAPK1,GRB2,RRAS,MAPK3
UDP-D-xylose and UDP-D-glucuronate Biosynthesis	1,09E00	5E-01	NaN	UGDH
Spermine Biosynthesis	1,09E00	5E-01	NaN	SMS
Palmitate Biosynthesis I (Animals)	1,09E00	5E-01	NaN	FASN
Spermidine Biosynthesis I	1,09E00	5E-01	NaN	SRM
Fatty Acid Biosynthesis Initiation II	1,09E00	5E-01	NaN	FASN
Cysteine Biosynthesis/Homocysteine Degradation	1,09E00	5E-01	NaN	CBS/CBSL
Glutamate Biosynthesis II	1,09E00	5E-01	NaN	GLUD1
Glutamate Degradation X	1,09E00	5E-01	NaN	GLUD1
EGF Signaling	1,09E00	8,93E-02	NaN	STAT1,MAPK1,GRB2,CSNK2A1,MAPK3
LPS-stimulated MAPK Signaling	1,08E00	8,22E-02	NaN	NRAS,CDC42,MAPK1,RRAS,RAC1,MAPK3
NF-κB Activation by Viruses	1,08E00	8,22E-02	NaN	NRAS,ITGAV,ITGB1,MAPK1,RRAS,MAPK3
Prolactin Signaling	1,08E00	8,22E-02	NaN	NRAS,STAT1,MAPK1,GRB2,RRAS,MAPK3
STAT3 Pathway	1,08E00	8,22E-02	NaN	NRAS,PDGFRB,MAPK1,RRAS,RAC1,MAPK3
Role of JAK family kinases in IL-6-type Cytokine Signaling	1,08E00	1,2E-01	NaN	STAT1,MAPK1,MAPK3
ErbB2-ErbB3 Signaling	1,06E00	8,77E-02	NaN	NRAS,MAPK1,GRB2,RRAS,MAPK3
Antiproliferative Role of TOB in T Cell Signaling	1,04E00	1,15E-01	NaN	SKP1,PABPC1,MAPK1
NAD Salvage Pathway II	1,04E00	1,15E-01	NaN	ACP1,NT5C,NT5E
Chronic Myeloid Leukemia Signaling	1,04E00	7,53E-02	NaN	NRAS,MAPK1,GRB2,PA2G4,CRK,RRAS,MAPK3
Melanoma Signaling	1,02E00	9,52E-02	NaN	NRAS,MAPK1,RRAS,MAPK3
UVC-Induced MAPK Signaling	1,02E00	9,52E-02	NaN	NRAS,MAPK1,RRAS,MAPK3
Agranulocyte Adhesion and Diapedesis	1,02E00	6,35E-02	NaN	GNAI2,FN1,MMP2,ACTG1,ITGB1,EZR,MSN,C5,MYL9,MYH10,RDX,MYH9
HER-2 Signaling in Breast Cancer	1,02E00	7,89E-02	NaN	NRAS,CDC42,MMP2,ITGB1,GRB2,RRAS
Mevalonate Pathway I	1E00	1,54E-01	NaN	ACAT2,ACAT1
IL-15 Production	1E00	1,11E-01	NaN	TWF1,STAT1,PTK7
Xenobiotic Metabolism Signaling	9,99E-01	5,9E-02	NaN	FTL,HSP90B1,GSTM3,CAMK2D,NQO1,ESD,NRAS,GSTO1,MAPK1,PPP2R1A,HSP90AB1,GSTP1,ALDH1A3,HSP90AA1,RRAS,MAPK3
ErbB4 Signaling	9,88E-01	8,33E-02	NaN	NRAS,MAPK1,GRB2,RRAS,MAPK3
Endothelin-1 Signaling	9,87E-01	6,4E-02	NaN	PRDX6,GNAI2,NRAS,GNAS,GNA11,MAPK1,GRB2,PLCB3,PDIA3,RRAS,MAPK3
IL-12 Signaling and Production in Macrophages	9,76E-01	6,72E-02	NaN	RAB7A,STAT1,CLU,APOA1,MAPK1,APOE,RBP4,ALB,MAPK3
Acute Myeloid Leukemia Signaling	9,59E-01	7,59E-02	NaN	NRAS,MAPK1,GRB2,IDH1,RRAS,MAPK3
Regulation of IL-2 Expression in Activated and Anergic T Lymphocytes	9,59E-01	7,59E-02	NaN	NRAS,MAPK1,GRB2,RRAS,RAC1,MAPK3
DNA Double-Strand Break Repair by Non-Homologous End Joining	9,48E-01	1,43E-01	NaN	XRCC6,XRCC5
Colanic Acid Building Blocks Biosynthesis	9,48E-01	1,43E-01	NaN	UGP2,UGDH
Ceramide Signaling	9,4E-01	7,5E-02	NaN	NRAS,PPP2R1A,CYCS,CTSD,RRAS,MAPK3
Antioxidant Action of Vitamin C	9,3E-01	7,07E-02	NaN	PRDX6,GSTO1,TXN,MAPK1,PLCB3,PDIA3,MAPK3
Tec Kinase Signaling	9,26E-01	6,37E-02	NaN	GNAI2,GNAS,GNA11,ACTG1,GNB2L1,STAT1,ITGB1,GNB1,RHOC,RHOA
Diphthamide Biosynthesis	9,23E-01	3,33E-01	NaN	EEF2
Trehalose Degradation II (Trehalase)	9,23E-01	3,33E-01	NaN	HK1
NADH Repair	9,23E-01	3,33E-01	NaN	GAPDH
Methylglyoxal Degradation I	9,23E-01	3,33E-01	NaN	GLO1
Coenzyme A Biosynthesis	9,23E-01	3,33E-01	NaN	PPCS
Glutathione Biosynthesis	9,23E-01	3,33E-01	NaN	GCLM
Tetrahydrobiopterin Biosynthesis I	9,23E-01	3,33E-01	NaN	SPR
D-glucuronate Degradation I	9,23E-01	3,33E-01	NaN	AKR1A1
Thyroid Hormone Biosynthesis	9,23E-01	3,33E-01	NaN	CTSD
Tetrahydrobiopterin Biosynthesis II	9,23E-01	3,33E-01	NaN	SPR
S-adenosyl-L-methionine Biosynthesis	9,23E-01	3,33E-01	NaN	MAT2A
PCP pathway	9,2E-01	7,94E-02	NaN	HSPB1,PFN1,RAC1,PFN2,RHOA
Role of PI3K/AKT Signaling in the Pathogenesis of Influenza	8,99E-01	7,81E-02	NaN	GNAI2,KPNA3,MAPK1,CRK,MAPK3
γ-glutamyl Cycle	8,98E-01	1,33E-01	NaN	ANPEP,GCLM
Vitamin-C Transport	8,98E-01	1,33E-01	NaN	GSTO1,TXN
Sonic Hedgehog Signaling	8,97E-01	1E-01	NaN	PRKACA,PRKAR2A,PRKAR1A
Mitotic Roles of Polo-Like Kinase	8,58E-01	7,58E-02	NaN	HSP90B1,CAPN1,PPP2R1A,HSP90AB1,HSP90AA1
FGF Signaling	8,49E-01	7,06E-02	NaN	MAPK1,GRB2,FGF2,CRK,RAC1,MAPK3
Regulation of the Epithelial-Mesenchymal Transition Pathway	8,41E-01	5,98E-02	NaN	LOX,NRAS,PDGFRB,MMP2,CTNNB1,MAPK1,GRB2,FGF2,RRAS,RHOA,MAPK3
Erythropoietin Signaling	8,39E-01	7,46E-02	NaN	NRAS,MAPK1,GRB2,RRAS,MAPK3
ErbB Signaling	8,32E-01	6,98E-02	NaN	NRAS,CDC42,MAPK1,GRB2,RRAS,MAPK3
D-myo-inositol-5-phosphate Metabolism	8,13E-01	6,16E-02	NaN	ACP1,ATP1A1,PPP1R12A,PPP1R14B,PPP1R7,PLCB3,NT5C,NUDT5,PIP4K2A
Uracil Degradation II (Reductive)	8,07E-01	2,5E-01	NaN	DPYSL2
2-ketoglutarate Dehydrogenase Complex	8,07E-01	2,5E-01	NaN	DLD
PRPP Biosynthesis I	8,07E-01	2,5E-01	NaN	PRPS1
Branched-chain α-keto acid Dehydrogenase Complex	8,07E-01	2,5E-01	NaN	DLD
Ascorbate Recycling (Cytosolic)	8,07E-01	2,5E-01	NaN	GSTO1
Thymine Degradation	8,07E-01	2,5E-01	NaN	DPYSL2
Geranylgeranyldiphosphate Biosynthesis	8,07E-01	2,5E-01	NaN	FDPS
N-acetylglucosamine Degradation II	8,07E-01	2,5E-01	NaN	NAGK
Fatty Acid β-oxidation III (Unsaturated, Odd Number)	8,07E-01	2,5E-01	NaN	ECI1
CCR5 Signaling in Macrophages	8,01E-01	7,25E-02	NaN	GNAI2,GNAS,GNB2L1,GNB1,MAPK1
Growth Hormone Signaling	8,01E-01	7,25E-02	NaN	A2M,STAT1,MAPK1,IGFBP3,MAPK3
Gαq Signaling	8,01E-01	6,12E-02	NaN	GNAS,GNA11,GNB2L1,GNB1,MAPK1,PLCB3,RHOC,RHOA,MAPK3
Crosstalk between Dendritic Cells and Natural Killer Cells	7,84E-01	6,74E-02	NaN	HLA-A,TLN1,ACTG1,CAMK2D,TLN2,FSCN1
Inhibition of Angiogenesis by TSP1	7,8E-01	8,82E-02	NaN	MAPK1,HSPG2,THBS1
Valine Degradation I	7,69E-01	1,11E-01	NaN	DLD,ECHS1
Phototransduction Pathway	7,52E-01	7,55E-02	NaN	GNB1,PRKACA,PRKAR2A,PRKAR1A
IL-17 Signaling	7,48E-01	6,94E-02	NaN	NRAS,MAPK1,TIMP1,RRAS,MAPK3
Glutathione Redox Reactions I	7,32E-01	1,05E-01	NaN	PRDX6,GSR
B Cell Receptor Signaling	7,27E-01	5,75E-02	NaN	NRAS,CDC42,CFL1,CAMK2D,MAPK1,GRB2,RRAS,RAC1,CFL2,MAPK3
Creatine-phosphate Biosynthesis	7,19E-01	2E-01	NaN	CKB
2-oxobutanoate Degradation I	7,19E-01	2E-01	NaN	DLD
Trans, trans-farnesyl Diphosphate Biosynthesis	7,19E-01	2E-01	NaN	FDPS
Citrulline-Nitric Oxide Cycle	7,19E-01	2E-01	NaN	ASS1
Granzyme A Signaling	6,98E-01	1E-01	NaN	HMGB2,NME1
Dendritic Cell Maturation	6,96E-01	5,65E-02	NaN	HLA-A,STAT1,COL3A1,MAPK1,PLCB3,COL1A2,PDIA3,COL1A1,FSCN1,MAPK3
Mouse Embryonic Stem Cell Pluripotency	6,94E-01	6,32E-02	NaN	NRAS,CTNNB1,MAPK1,GRB2,RRAS,MAPK3
VEGF Family Ligand-Receptor Interactions	6,82E-01	6,58E-02	NaN	NRAS,MAPK1,GRB2,RRAS,MAPK3
Estrogen Biosynthesis	6,81E-01	7,89E-02	NaN	AKR1C3,HSD17B10,HSD17B12
T Cell Receptor Signaling	6,67E-01	6,19E-02	NaN	NRAS,MAPK1,GRB2,RRAS,RAC1,MAPK3
PKCθ Signaling in T Lymphocytes	6,59E-01	5,93E-02	NaN	NRAS,CAMK2D,MAPK1,GRB2,RRAS,RAC1,MAPK3
Docosahexaenoic Acid (DHA) Signaling	6,59E-01	7,69E-02	NaN	SERPINF1,BAX,CYCS
p53 Signaling	6,54E-01	6,12E-02	NaN	CTNNB1,SERPINE2,BAX,THBS1,PCNA,TP53I3
VDR/RXR Activation	6,52E-01	6,41E-02	NaN	SERPINB1,PSMC5,IGFBP3,CSNK2A1,IGFBP6
Urea Cycle	6,49E-01	1,67E-01	NaN	ASS1
Thioredoxin Pathway	6,49E-01	1,67E-01	NaN	TXN
Glycine Cleavage Complex	6,49E-01	1,67E-01	NaN	DLD
Selenocysteine Biosynthesis II (Archaea and Eukaryotes)	6,49E-01	1,67E-01	NaN	SARS
Rapoport-Luebering Glycolytic Shunt	6,49E-01	1,67E-01	NaN	PGAM1
NAD Biosynthesis III	6,49E-01	1,67E-01	NaN	NAMPT
Role of PKR in Interferon Induction and Antiviral Response	6,38E-01	7,5E-02	NaN	EIF2S1,STAT1,CYCS
Tryptophan Degradation X (Mammalian, via Tryptamine)	6,35E-01	9,09E-02	NaN	AKR1A1,ALDH1A3
Ethanol Degradation IV	6,35E-01	9,09E-02	NaN	CYGB,ALDH1A3
Induction of Apoptosis by HIV1	6,24E-01	6,67E-02	NaN	SLC25A5,SLC25A6,BAX,CYCS
FcγRIIB Signaling in B Lymphocytes	6,17E-01	7,32E-02	NaN	NRAS,GRB2,RRAS
Acetyl-CoA Biosynthesis I (Pyruvate Dehydrogenase Complex)	5,9E-01	1,43E-01	NaN	DLD
Tumoricidal Function of Hepatic Natural Killer Cells	5,81E-01	8,33E-02	NaN	BAX,CYCS
G-Protein Coupled Receptor Signaling	5,74E-01	5,08E-02	NaN	GNA11,CAMK2D,PRKAR1A,NRAS,GNAI2,GNAS,MAPK1,GRB2,PLCB3,PRKACA,RRAS,PRKAR2A,MAPK3
Pyridoxal 5'-phosphate Salvage Pathway	5,61E-01	6,25E-02	NaN	MAPK1,PDXK,PNPO,MAPK3
Cell Cycle: G1/S Checkpoint Regulation	5,61E-01	6,25E-02	NaN	RPL5,RPL11,SKP1,PA2G4
Estrogen Receptor Signaling	5,6E-01	5,51E-02	NaN	NRAS,MAPK1,GRB2,PHB2,HNRNPD,RRAS,MAPK3
IL-17A Signaling in Gastric Cells	5,55E-01	8E-02	NaN	MAPK1,MAPK3
Airway Pathology in Chronic Obstructive Pulmonary Disease	5,41E-01	1,25E-01	NaN	MMP2
Purine Ribonucleosides Degradation to Ribose-1-phosphate	5,41E-01	1,25E-01	NaN	PNP
Fc Epsilon RI Signaling	5,35E-01	5,56E-02	NaN	NRAS,MAPK1,GRB2,RRAS,RAC1,MAPK3
IL-15 Signaling	5,33E-01	6,06E-02	NaN	NRAS,MAPK1,RRAS,MAPK3
Angiopoietin Signaling	5,33E-01	6,06E-02	NaN	NRAS,GRB2,CRK,RRAS
D-myo-inositol (1,4,5,6)-Tetrakisphosphate Biosynthesis	5,3E-01	5,38E-02	NaN	ACP1,ATP1A1,PPP1R12A,PPP1R14B,PPP1R7,NT5C,NUDT5
D-myo-inositol (3,4,5,6)-tetrakisphosphate Biosynthesis	5,3E-01	5,38E-02	NaN	ACP1,ATP1A1,PPP1R12A,PPP1R14B,PPP1R7,NT5C,NUDT5
Serotonin Degradation	5,19E-01	5,97E-02	NaN	HSD17B10,ADH5,AKR1A1,ALDH1A3
Natural Killer Cell Signaling	5,14E-01	5,45E-02	NaN	NRAS,MAPK1,GRB2,RRAS,RAC1,MAPK3
D-myo-inositol (1,4,5)-Trisphosphate Biosynthesis	5,09E-01	7,41E-02	NaN	PLCB3,PIP4K2A
nNOS Signaling in Neurons	5,09E-01	6,38E-02	NaN	CAPN1,CAPNS1,CAPN2
Role of NANOG in Mammalian Embryonic Stem Cell Pluripotency	5,03E-01	5,41E-02	NaN	NRAS,CTNNB1,MAPK1,GRB2,RRAS,MAPK3
Granulocyte Adhesion and Diapedesis	5,02E-01	5,08E-02	NaN	HSPB1,GNAI2,MMP2,ITGB1,EZR,MSN,C5,THY1,RDX
Prostanoid Biosynthesis	4,99E-01	1,11E-01	NaN	PTGIS
3-phosphoinositide Biosynthesis	4,76E-01	5,06E-02	NaN	ACP1,ATP1A1,PPP1R12A,PPP1R14B,PPP1R7,NT5C,NUDT5,PIP4K2A
Death Receptor Signaling	4,75E-01	5,43E-02	NaN	HSPB1,ACTG1,CYCS,LMNA,SPTAN1
Salvage Pathways of Pyrimidine Ribonucleotides	4,65E-01	5,38E-02	NaN	MAPK1,CMPK1,NME1,AK1,MAPK3
Calcium Transport I	4,61E-01	1E-01	NaN	ANXA5
Role of Macrophages, Fibroblasts and Endothelial Cells in Rheumatoid Arthritis	4,6E-01	4,73E-02	NaN	CTNNB1,CAMK2D,C5,FGF2,RHOA,NRAS,FN1,MAPK1,PLCB3,PDIA3,LRP1,RRAS,RAC1,MAPK3
Role of p14/p19ARF in Tumor Suppression	4,49E-01	6,67E-02	NaN	NPM1,RAC1
4-1BB Signaling in T Lymphocytes	4,31E-01	6,45E-02	NaN	MAPK1,MAPK3
UVB-Induced MAPK Signaling	4,22E-01	5,66E-02	NaN	MAPK1,EIF4E,MAPK3
TREM1 Signaling	4,22E-01	5,33E-02	NaN	ITGB1,MAPK1,GRB2,MAPK3
Cytotoxic T Lymphocyte-mediated Apoptosis of Target Cells	4,14E-01	6,25E-02	NaN	HLA-A,CYCS
Lymphotoxin β Receptor Signaling	4,09E-01	5,56E-02	NaN	MAPK1,CYCS,MAPK3
Cleavage and Polyadenylation of Pre-mRNA	3,99E-01	8,33E-02	NaN	NUDT21
BER pathway	3,99E-01	8,33E-02	NaN	PCNA
MIF-mediated Glucocorticoid Regulation	3,97E-01	6,06E-02	NaN	MAPK1,MAPK3
Retinoate Biosynthesis I	3,97E-01	6,06E-02	NaN	AKR1C3,ALDH1A3
3-phosphoinositide Degradation	3,87E-01	4,76E-02	NaN	ACP1,ATP1A1,PPP1R12A,PPP1R14B,PPP1R7,NT5C,NUDT5
Reelin Signaling in Neurons	3,81E-01	5,06E-02	NaN	PAFAH1B2,PAFAH1B1,ITGB1,APOE
Superpathway of Inositol Phosphate Compounds	3,76E-01	4,62E-02	NaN	ACP1,ATP1A1,PPP1R12A,PPP1R14B,PPP1R7,PLCB3,NT5C,NUDT5,PIP4K2A
Ubiquinol-10 Biosynthesis (Eukaryotic)	3,73E-01	7,69E-02	NaN	ECHDC1
Cholesterol Biosynthesis I	3,73E-01	7,69E-02	NaN	LSS
NAD Phosphorylation and Dephosphorylation	3,73E-01	7,69E-02	NaN	ACP1
Cholesterol Biosynthesis II (via 24,25-dihydrolanosterol)	3,73E-01	7,69E-02	NaN	LSS
Cholesterol Biosynthesis III (via Desmosterol)	3,73E-01	7,69E-02	NaN	LSS
Role of Pattern Recognition Receptors in Recognition of Bacteria and Viruses	3,71E-01	4,76E-02	NaN	EIF2S1,C3,MAPK1,C5,PTX3,MAPK3
Cell Cycle Regulation by BTG Family Proteins	3,67E-01	5,71E-02	NaN	PPP2R1A,PRMT1
IL-17A Signaling in Fibroblasts	3,67E-01	5,71E-02	NaN	MAPK1,MAPK3
Nucleotide Excision Repair Pathway	3,67E-01	5,71E-02	NaN	RAD23B,RPA2
Phospholipases	3,62E-01	5,17E-02	NaN	PRDX6,PLCB3,PDIA3
Stearate Biosynthesis I (Animals)	3,53E-01	5,56E-02	NaN	FASN,BDH2
Interferon Signaling	3,53E-01	5,56E-02	NaN	STAT1,BAX
autophagy	3,53E-01	5,56E-02	NaN	LAMP1,MAP1LC3B
Androgen Biosynthesis	3,49E-01	7,14E-02	NaN	AKR1C3
Superpathway of Citrulline Metabolism	3,49E-01	7,14E-02	NaN	ASS1
Type I Diabetes Mellitus Signaling	3,16E-01	4,55E-02	NaN	HLA-A,STAT1,HSPD1,MAPK1,CYCS
Extrinsic Prothrombin Activation Pathway	3,08E-01	6,25E-02	NaN	SERPINC1
Mismatch Repair in Eukaryotes	3,08E-01	6,25E-02	NaN	PCNA
Histamine Degradation	3,08E-01	6,25E-02	NaN	ALDH1A3
Eicosanoid Signaling	3,02E-01	4,69E-02	NaN	PRDX6,AKR1C3,PTGIS
MIF Regulation of Innate Immunity	2,91E-01	4,88E-02	NaN	MAPK1,MAPK3
γ-linolenate Biosynthesis II (Animals)	2,89E-01	5,88E-02	NaN	CYB5R3
PXR/RXR Activation	2,76E-01	4,48E-02	NaN	PRKACA,PRKAR2A,PRKAR1A
Oxidative Ethanol Degradation III	2,73E-01	5,56E-02	NaN	ALDH1A3
IL-10 Signaling	2,67E-01	4,41E-02	NaN	MAPK1,BLVRB,BLVRA
Role of IL-17F in Allergic Inflammatory Airway Diseases	2,59E-01	4,55E-02	NaN	MAPK1,MAPK3
iNOS Signaling	2,59E-01	4,55E-02	NaN	STAT1,MAPK1
Serotonin Receptor Signaling	2,59E-01	4,55E-02	NaN	GNAS,SPR
GADD45 Signaling	2,57E-01	5,26E-02	NaN	PCNA
Fatty Acid α-oxidation	2,57E-01	5,26E-02	NaN	ALDH1A3
DNA Methylation and Transcriptional Repression Signaling	2,43E-01	5E-02	NaN	RBBP7
Putrescine Degradation III	2,43E-01	5E-02	NaN	ALDH1A3
Maturity Onset Diabetes of Young (MODY) Signaling	2,17E-01	4,55E-02	NaN	GAPDH
Role of Lipids/Lipid Rafts in the Pathogenesis of Influenza	2,06E-01	4,35E-02	NaN	FDPS
Role of JAK1, JAK2 and TYK2 in Interferon Signaling	1,95E-01	4,17E-02	NaN	STAT1
Triacylglycerol Degradation	1,95E-01	4,17E-02	NaN	PRDX6

## Sheet: A MSC H2O2
© 2000-2016 QIAGEN. All rights reserved.
Ingenuity Canonical Pathways	-log(p-value)	Ratio	z-score	Molecules
Hepatic Fibrosis / Hepatic Stellate Cell Activation	1,14E01	1,15E-01	NaN	IGFBP4,MMP2,COL6A3,COL6A1,COL3A1,IGFBP5,COL1A2,COL1A1,COL6A2,COL5A1,TIMP2,MYH9,A2M,COL12A1,COL5A2,FN1,COL2A1,IGFBP3,TIMP1,SERPINE1,MMP1
Remodeling of Epithelial Adherens Junctions	1,13E01	2,06E-01	NaN	IQGAP1,ACTR2,VCL,TUBB3,TUBB,MAPRE1,ACTN1,TUBA1C,NME1,ARPC1B,ACTR3,ZYX,ACTG1,ACTN4
Protein Ubiquitination Pathway	1,11E01	9,41E-02	NaN	PSMB6,UBA1,PSMA4,PSMD3,PSMD7,HSP90B1,PSMA6,HSPD1,PSMA3,PSMB5,HSPE1,HSPB1,HSPA9,HSPA4,PSMA7,PSMD9,HSPA8,HSPA5,HSP90AB1,PSMC6,PSMD2,PSMA1,HSP90AA1,PSMA5
Inhibition of Matrix Metalloproteases	7,93E00	2,31E-01	NaN	A2M,MMP3,MMP2,THBS2,HSPG2,ADAM12,TIMP1,MMP1,TIMP2
Actin Cytoskeleton Signaling	6,85E00	7,83E-02	NaN	IQGAP1,ACTR2,TLN1,VCL,EZR,MSN,ACTN1,ARPC1B,ACTR3,RDX,MYH9,FN1,PFN1,ACTG1,GSN,ACTN4,PFN2
Epithelial Adherens Junction Signaling	6,82E00	9,59E-02	NaN	IQGAP1,ACTR2,VCL,TUBB3,TUBB,TGFBR3,ACTN1,TUBA1C,ARPC1B,ACTR3,MYH9,ZYX,ACTG1,ACTN4
RhoA Signaling	6,04E00	9,84E-02	NaN	ACTR2,PFN1,ACTG1,SEPT11,EZR,MSN,SEPT9,ACTR3,ARPC1B,PFN2,SEPT2,RDX
Complement System	5,66E00	1,89E-01	NaN	MASP1,C4A/C4B,C3,C5,CFD,C1S,SERPING1
Glycolysis I	5,57E00	2,4E-01	NaN	TPI1,PGAM1,PGK1,PKM,GAPDH,ENO1
Gluconeogenesis I	5,57E00	2,4E-01	NaN	PGAM1,PGK1,GAPDH,MDH2,ENO1,MDH1
IGF-1 Signaling	5,32E00	1,03E-01	NaN	IGFBP4,YWHAQ,YWHAG,IGFBP7,IGFBP3,IGFBP5,YWHAE,YWHAH,YWHAB,IGFBP6
Acute Phase Response Signaling	5,29E00	7,69E-02	NaN	C3,SERPINF1,HNRNPK,ITIH3,C5,A2M,C4A/C4B,FN1,SERPINE1,C1S,AHSG,SERPING1,SERPIND1
EIF2 Signaling	4,86E00	7,03E-02	NaN	RPL7A,RPS18,PABPC1,RPS14,RPSA,RPL8,RPL5,RPL7,RPS9,RPS4Y1,EIF4A1,RPS4X,EIF3F
14-3-3-mediated Signaling	4,59E00	8,55E-02	NaN	VIM,YWHAQ,YWHAG,TUBB3,TUBB,PDIA3,TUBA1C,YWHAE,YWHAH,YWHAB
Leukocyte Extravasation Signaling	4,55E00	6,57E-02	NaN	MMP2,VCL,EZR,MSN,ACTN1,RDX,TIMP2,MMP3,GNAI2,ACTG1,TIMP1,ACTN4,MMP1
Unfolded protein response	4,53E00	1,3E-01	NaN	HSPA4,HSPA9,HSPA8,HSP90B1,HSPA5,VCP,P4HB
Aldosterone Signaling in Epithelial Cells	4,32E00	7,24E-02	NaN	HSPB1,HSPA4,HSPA9,HSPA8,HSP90B1,HSPA5,HSPD1,PDIA3,HSP90AB1,HSP90AA1,HSPE1
Germ Cell-Sertoli Cell Junction Signaling	4,12E00	6,88E-02	NaN	ZYX,A2M,IQGAP1,VCL,ACTG1,TUBB3,TUBB,GSN,ACTN1,TUBA1C,ACTN4
Intrinsic Prothrombin Activation Pathway	3,98E00	1,72E-01	NaN	COL3A1,COL1A2,COL2A1,COL1A1,SERPINC1
Signaling by Rho Family GTPases	3,81E00	5,56E-02	NaN	IQGAP1,ACTR2,EZR,MSN,ACTR3,ARPC1B,SEPT2,RDX,VIM,GNAI2,ACTG1,SEPT11,SEPT9
Atherosclerosis Signaling	3,64E00	7,26E-02	NaN	PRDX6,MMP3,APOB,CLU,COL3A1,COL1A2,COL2A1,COL1A1,MMP1
Coagulation System	3,58E00	1,43E-01	NaN	A2M,SERPINA5,SERPINE1,SERPINC1,SERPIND1
Agranulocyte Adhesion and Diapedesis	3,48E00	5,82E-02	NaN	GNAI2,MMP3,FN1,MMP2,ACTG1,EZR,MSN,C5,MMP1,RDX,MYH9
Myc Mediated Apoptosis Signaling	3,41E00	1,03E-01	NaN	YWHAQ,YWHAG,CYCS,YWHAE,YWHAH,YWHAB
Pentose Phosphate Pathway	3,17E00	2,73E-01	NaN	TKT,PGD,TALDO1
Regulation of eIF4 and p70S6K Signaling	3,12E00	6,16E-02	NaN	RPS9,RPS18,PABPC1,RPS4Y1,EIF4A1,RPS4X,EIF3F,RPS14,RPSA
Sertoli Cell-Sertoli Cell Junction Signaling	3,1E00	5,62E-02	NaN	A2M,VCL,ACTG1,TUBB3,TUBB,TGFBR3,ACTN1,TUBA1C,ACTN4,SPTAN1
p70S6K Signaling	3,08E00	6,72E-02	NaN	GNAI2,YWHAQ,YWHAG,PDIA3,YWHAE,YWHAH,EEF2,YWHAB
LXR/RXR Activation	3,03E00	6,61E-02	NaN	C4A/C4B,APOB,C3,SERPINF1,CLU,FASN,AHSG,PLTP
Axonal Guidance Signaling	3E00	3,92E-02	NaN	ACTR2,MMP2,TUBB3,TUBB,DPYSL2,TUBA1C,ARPC1B,ACTR3,RTN4,ADAMTS1,GNAI2,PFN1,BMP1,SEMA7A,PDIA3,ADAM12,PFN2
PI3K/AKT Signaling	2,98E00	6,5E-02	NaN	YWHAQ,YWHAG,HSP90B1,HSP90AB1,YWHAE,HSP90AA1,YWHAH,YWHAB
ILK Signaling	2,95E00	5,38E-02	NaN	FLNB,VIM,FN1,VCL,ACTG1,FLNC,ACTN1,ACTN4,MYH9,NACA
Caveolar-mediated Endocytosis Signaling	2,94E00	8,45E-02	NaN	FLNB,ACTG1,COPE,PTRF,FLNC,COPG1
Cell Cycle: G2/M DNA Damage Checkpoint Regulation	2,89E00	1,02E-01	NaN	YWHAQ,YWHAG,YWHAE,YWHAH,YWHAB
FXR/RXR Activation	2,89E00	6,3E-02	NaN	C4A/C4B,APOB,C3,SERPINF1,CLU,FASN,AHSG,PLTP
Glucocorticoid Receptor Signaling	2,65E00	4,36E-02	NaN	A2M,HSPA4,HSPA9,HSPA8,HSP90B1,HSPA5,SERPINE1,HSP90AB1,HSP90AA1,YWHAH,MMP1,ANXA1
RhoGDI Signaling	2,61E00	5,2E-02	NaN	GNAI2,ACTR2,ACTG1,EZR,MSN,GDI2,ACTR3,ARPC1B,RDX
Regulation of Cellular Mechanics by Calpain Protease	2,6E00	8,77E-02	NaN	TLN1,VCL,EZR,ACTN1,ACTN4
Granulocyte Adhesion and Diapedesis	2,54E00	5,08E-02	NaN	HSPB1,GNAI2,MMP3,MMP2,EZR,MSN,C5,MMP1,RDX
Clathrin-mediated Endocytosis Signaling	2,42E00	4,86E-02	NaN	ACTR2,APOB,CLTA,ACTG1,HSPA8,CLU,CLTC,ACTR3,ARPC1B
ERK5 Signaling	2,41E00	7,94E-02	NaN	YWHAQ,YWHAG,YWHAE,YWHAH,YWHAB
phagosome maturation	2,41E00	5,83E-02	NaN	PRDX6,DYNC1H1,TUBB3,TUBB,PRDX2,TUBA1C,PRDX1
Pyruvate Fermentation to Lactate	2,41E00	3,33E-01	NaN	LDHA,LDHB
Pentose Phosphate Pathway (Non-oxidative Branch)	2,41E00	3,33E-01	NaN	TKT,TALDO1
Regulation of Actin-based Motility by Rho	2,39E00	6,59E-02	NaN	ACTR2,PFN1,GSN,ACTR3,ARPC1B,PFN2
mTOR Signaling	2,37E00	4,79E-02	NaN	RPS9,RPS18,FKBP1A,RPS4Y1,EIF4A1,RPS4X,EIF3F,RPS14,RPSA
Hypoxia Signaling in the Cardiovascular System	2,35E00	7,69E-02	NaN	HSP90B1,LDHA,HSP90AB1,HSP90AA1,P4HB
Fcγ Receptor-mediated Phagocytosis in Macrophages and Monocytes	2,34E00	6,45E-02	NaN	ACTR2,TLN1,ACTG1,EZR,ACTR3,ARPC1B
Aspartate Degradation II	2,26E00	2,86E-01	NaN	MDH2,MDH1
Integrin Signaling	2,18E00	4,48E-02	NaN	ZYX,ACTR2,TLN1,VCL,ACTG1,ACTN1,ACTN4,ACTR3,ARPC1B
HIF1α Signaling	2,15E00	5,88E-02	NaN	MMP3,MMP2,LDHA,HSP90AA1,MMP1,LDHB
Airway Pathology in Chronic Obstructive Pulmonary Disease	2,14E00	2,5E-01	NaN	MMP2,MMP1
UDP-N-acetyl-D-galactosamine Biosynthesis II	2,04E00	2,22E-01	NaN	UAP1,HK1
eNOS Signaling	2,02E00	4,93E-02	NaN	HSPA4,HSPA9,HSPA8,HSP90B1,HSPA5,HSP90AB1,HSP90AA1
HIPPO signaling	1,85E00	5,81E-02	NaN	YWHAQ,YWHAG,YWHAE,YWHAH,YWHAB
Huntington's Disease Signaling	1,84E00	3,93E-02	NaN	HSPA4,HSPA9,CLTA,HSPA8,CLTC,HSPA5,CYCS,CTSD,ATP5B
Virus Entry via Endocytic Pathways	1,79E00	5,62E-02	NaN	FLNB,CLTA,ACTG1,CLTC,FLNC
Acetyl-CoA Biosynthesis III (from Citrate)	1,78E00	1E00	NaN	ACLY
Oncostatin M Signaling	1,73E00	8,82E-02	NaN	MMP3,CHI3L1,MMP1
Death Receptor Signaling	1,73E00	5,43E-02	NaN	HSPB1,ACTG1,CYCS,LMNA,SPTAN1
VEGF Signaling	1,73E00	5,43E-02	NaN	VCL,ACTG1,ACTN1,ACTN4,YWHAE
Antigen Presentation Pathway	1,64E00	8,11E-02	NaN	PSMB6,PDIA3,PSMB5
Telomere Extension by Telomerase	1,6E00	1,33E-01	NaN	XRCC6,HNRNPA2B1
Paxillin Signaling	1,58E00	4,95E-02	NaN	TLN1,VCL,ACTG1,ACTN1,ACTN4
Granzyme B Signaling	1,55E00	1,25E-01	NaN	CYCS,LMNB2
Aryl Hydrocarbon Receptor Signaling	1,53E00	4,29E-02	NaN	HSPB1,GSTO1,HSP90B1,HSP90AB1,CTSD,HSP90AA1
PPARα/RXRα Activation	1,52E00	3,91E-02	NaN	HSP90B1,TGFBR3,FASN,PDIA3,CAND1,HSP90AB1,HSP90AA1
NRF2-mediated Oxidative Stress Response	1,51E00	3,89E-02	NaN	GSTO1,SOD3,ACTG1,ERP29,PPIB,VCP,PRDX1
RAN Signaling	1,5E00	1,18E-01	NaN	IPO5,KPNB1
UDP-D-xylose and UDP-D-glucuronate Biosynthesis	1,48E00	5E-01	NaN	UGDH
Palmitate Biosynthesis I (Animals)	1,48E00	5E-01	NaN	FASN
Fatty Acid Biosynthesis Initiation II	1,48E00	5E-01	NaN	FASN
Gap Junction Signaling	1,35E00	3,87E-02	NaN	GNAI2,ACTG1,TUBB3,TUBB,PDIA3,TUBA1C
Endoplasmic Reticulum Stress Pathway	1,33E00	9,52E-02	NaN	HSP90B1,HSPA5
Diphthamide Biosynthesis	1,31E00	3,33E-01	NaN	EEF2
Trehalose Degradation II (Trehalase)	1,31E00	3,33E-01	NaN	HK1
NADH Repair	1,31E00	3,33E-01	NaN	GAPDH
Hypusine Biosynthesis	1,31E00	3,33E-01	NaN	EIF5A
Thyroid Hormone Biosynthesis	1,31E00	3,33E-01	NaN	CTSD
Heparan Sulfate Biosynthesis (Late Stages)	1,3E00	6E-02	NaN	PRDX6,EXT1,EXT2
TCA Cycle II (Eukaryotic)	1,26E00	8,7E-02	NaN	MDH2,MDH1
Bladder Cancer Signaling	1,25E00	4,6E-02	NaN	MMP3,MMP2,THBS1,MMP1
Neuregulin Signaling	1,23E00	4,55E-02	NaN	HSP90B1,DCN,HSP90AB1,HSP90AA1
Arsenate Detoxification I (Glutaredoxin)	1,19E00	2,5E-01	NaN	GSTO1
Uracil Degradation II (Reductive)	1,19E00	2,5E-01	NaN	DPYSL2
Ascorbate Recycling (Cytosolic)	1,19E00	2,5E-01	NaN	GSTO1
Glutathione Redox Reactions II	1,19E00	2,5E-01	NaN	PDIA3
Thymine Degradation	1,19E00	2,5E-01	NaN	DPYSL2
Actin Nucleation by ARP-WASP Complex	1,18E00	5,36E-02	NaN	ACTR2,ACTR3,ARPC1B
Glioma Invasiveness Signaling	1,16E00	5,26E-02	NaN	MMP2,TIMP1,TIMP2
Heparan Sulfate Biosynthesis	1,16E00	5,26E-02	NaN	PRDX6,EXT1,EXT2
Dendritic Cell Maturation	1,13E00	3,39E-02	NaN	COL3A1,COL1A2,PDIA3,COL2A1,COL1A1,FSCN1
Pentose Phosphate Pathway (Oxidative Branch)	1,1E00	2E-01	NaN	PGD
Serine Biosynthesis	1,1E00	2E-01	NaN	PSAT1
Glutathione-mediated Detoxification	1,08E00	6,9E-02	NaN	GSTO1,ANPEP
PCP pathway	1,06E00	4,76E-02	NaN	HSPB1,PFN1,PFN2
ERK/MAPK Signaling	1,04E00	3,21E-02	NaN	HSPB1,YWHAQ,YWHAG,TLN1,YWHAH,YWHAB
Rac Signaling	1,02E00	3,85E-02	NaN	IQGAP1,ACTR2,ACTR3,ARPC1B
UDP-N-acetyl-D-glucosamine Biosynthesis II	1,02E00	1,67E-01	NaN	UAP1
Rapoport-Luebering Glycolytic Shunt	1,02E00	1,67E-01	NaN	PGAM1
Mitotic Roles of Polo-Like Kinase	1,01E00	4,55E-02	NaN	HSP90B1,HSP90AB1,HSP90AA1
fMLP Signaling in Neutrophils	9,78E-01	3,7E-02	NaN	GNAI2,ACTR2,ACTR3,ARPC1B
Agrin Interactions at Neuromuscular Junction	9,71E-01	4,35E-02	NaN	ACTG1,LAMC1,DAG1
Inhibition of Angiogenesis by TSP1	9,63E-01	5,88E-02	NaN	HSPG2,THBS1
Protein Kinase A Signaling	9,57E-01	2,59E-02	NaN	FLNB,GNAI2,YWHAQ,PYGB,YWHAG,FLNC,PDIA3,YWHAE,YWHAH,YWHAB
Superpathway of Serine and Glycine Biosynthesis I	9,57E-01	1,43E-01	NaN	PSAT1
GDP-glucose Biosynthesis	9,57E-01	1,43E-01	NaN	HK1
Ephrin B Signaling	9,17E-01	4,11E-02	NaN	GNAI2,HNRNPK,CAP1
Glucose and Glucose-1-phosphate Degradation	9,02E-01	1,25E-01	NaN	HK1
Superoxide Radicals Degradation	9,02E-01	1,25E-01	NaN	SOD3
Sphingomyelin Metabolism	9,02E-01	1,25E-01	NaN	SMPD1
Docosahexaenoic Acid (DHA) Signaling	8,65E-01	5,13E-02	NaN	SERPINF1,CYCS
tRNA Charging	8,65E-01	5,13E-02	NaN	GARS,WARS
VDR/RXR Activation	8,55E-01	3,85E-02	NaN	IGFBP3,IGFBP5,IGFBP6
Sucrose Degradation V (Mammalian)	8,55E-01	1,11E-01	NaN	TPI1
Ceramide Signaling	8,32E-01	3,75E-02	NaN	SMPD1,CYCS,CTSD
Mechanisms of Viral Exit from Host Cells	8,3E-01	4,88E-02	NaN	ACTG1,LMNB2
Calcium Transport I	8,12E-01	1E-01	NaN	ANXA5
Glycogen Degradation II	8,12E-01	1E-01	NaN	PYGB
Prostate Cancer Signaling	8,09E-01	3,66E-02	NaN	HSP90B1,HSP90AB1,HSP90AA1
Role of Osteoblasts, Osteoclasts and Chondrocytes in Rheumatoid Arthritis	8,03E-01	2,74E-02	NaN	MMP3,CTSK,GSN,BMP1,COL1A1,MMP1
TR/RXR Activation	7,77E-01	3,53E-02	NaN	COL6A3,FASN,ENO1
FAK Signaling	7,56E-01	3,45E-02	NaN	TLN1,VCL,ACTG1
UVA-Induced MAPK Signaling	7,46E-01	3,41E-02	NaN	SMPD1,PDIA3,CYCS
Glycogen Degradation III	7,4E-01	8,33E-02	NaN	PYGB
Crosstalk between Dendritic Cells and Natural Killer Cells	7,36E-01	3,37E-02	NaN	TLN1,ACTG1,FSCN1
Apoptosis Signaling	7,36E-01	3,37E-02	NaN	CYCS,LMNA,SPTAN1
Bile Acid Biosynthesis, Neutral Pathway	7,09E-01	7,69E-02	NaN	SCP2
Guanosine Nucleotides Degradation III	7,09E-01	7,69E-02	NaN	NT5E
PPAR Signaling	6,89E-01	3,19E-02	NaN	HSP90B1,HSP90AB1,HSP90AA1
DNA Double-Strand Break Repair by Non-Homologous End Joining	6,8E-01	7,14E-02	NaN	XRCC6
Urate Biosynthesis/Inosine 5'-phosphate Degradation	6,8E-01	7,14E-02	NaN	NT5E
Colanic Acid Building Blocks Biosynthesis	6,8E-01	7,14E-02	NaN	UGDH
Semaphorin Signaling in Neurons	6,59E-01	3,77E-02	NaN	SEMA7A,DPYSL2
nNOS Signaling in Skeletal Muscle Cells	6,54E-01	6,67E-02	NaN	DAG1
Chondroitin Sulfate Degradation (Metazoa)	6,54E-01	6,67E-02	NaN	HEXB
γ-glutamyl Cycle	6,54E-01	6,67E-02	NaN	ANPEP
Vitamin-C Transport	6,54E-01	6,67E-02	NaN	GSTO1
Telomerase Signaling	6,45E-01	3,03E-02	NaN	HSP90B1,HSP90AB1,HSP90AA1
Antioxidant Action of Vitamin C	6,45E-01	3,03E-02	NaN	PRDX6,GSTO1,PDIA3
Nitric Oxide Signaling in the Cardiovascular System	6,37E-01	3E-02	NaN	HSP90B1,HSP90AB1,HSP90AA1
Extrinsic Prothrombin Activation Pathway	6,29E-01	6,25E-02	NaN	SERPINC1
Dermatan Sulfate Degradation (Metazoa)	6,29E-01	6,25E-02	NaN	HEXB
Methylglyoxal Degradation III	6,29E-01	6,25E-02	NaN	AKR1B1
Parkinson's Signaling	6,29E-01	6,25E-02	NaN	CYCS
Adenosine Nucleotides Degradation II	6,06E-01	5,88E-02	NaN	NT5E
Phospholipases	6,02E-01	3,45E-02	NaN	PRDX6,PDIA3
Induction of Apoptosis by HIV1	5,81E-01	3,33E-02	NaN	SLC25A5,CYCS
Sphingosine-1-phosphate Signaling	5,67E-01	2,75E-02	NaN	GNAI2,SMPD1,PDIA3
Oxidative Phosphorylation	5,67E-01	2,75E-02	NaN	COX5A,CYCS,ATP5B
Glutathione Redox Reactions I	5,65E-01	5,26E-02	NaN	PRDX6
Androgen Signaling	5,53E-01	2,7E-02	NaN	GNAI2,HSPA4,HSP90AA1
Granzyme A Signaling	5,46E-01	5E-02	NaN	NME1
Purine Nucleotides Degradation II (Aerobic)	5,46E-01	5E-02	NaN	NT5E
Tight Junction Signaling	5,22E-01	2,4E-02	NaN	VCL,ACTG1,MYH9,SPTAN1
Cdc42 Signaling	5,22E-01	2,4E-02	NaN	IQGAP1,ACTR2,ACTR3,ARPC1B
IL-6 Signaling	5,19E-01	2,59E-02	NaN	A2M,HSPB1,COL1A1
Maturity Onset Diabetes of Young (MODY) Signaling	5,12E-01	4,55E-02	NaN	GAPDH
Pyrimidine Deoxyribonucleotides De Novo Biosynthesis I	5,12E-01	4,55E-02	NaN	NME1
CD28 Signaling in T Helper Cells	5,07E-01	2,54E-02	NaN	ACTR2,ACTR3,ARPC1B
Mitochondrial Dysfunction	5,01E-01	2,34E-02	NaN	COX5A,CYCS,PRDX3,ATP5B
Growth Hormone Signaling	4,98E-01	2,9E-02	NaN	A2M,IGFBP3
Melatonin Signaling	4,9E-01	2,86E-02	NaN	GNAI2,PDIA3
Ephrin Receptor Signaling	4,86E-01	2,3E-02	NaN	GNAI2,ACTR2,ACTR3,ARPC1B
GPCR-Mediated Integration of Enteroendocrine Signaling Exemplified by an L Cell	4,82E-01	2,82E-02	NaN	GNAI2,PDIA3
Tumoricidal Function of Hepatic Natural Killer Cells	4,81E-01	4,17E-02	NaN	CYCS
Triacylglycerol Degradation	4,81E-01	4,17E-02	NaN	PRDX6
IL-17 Signaling	4,74E-01	2,78E-02	NaN	MMP3,TIMP1
Calcium Signaling	4,66E-01	2,25E-02	NaN	TPM3,TPM4,TPM1,MYH9
Role of Pattern Recognition Receptors in Recognition of Bacteria and Viruses	4,59E-01	2,38E-02	NaN	C3,C5,PTX3
Lipid Antigen Presentation by CD1	4,53E-01	3,85E-02	NaN	PDIA3
Antiproliferative Role of TOB in T Cell Signaling	4,53E-01	3,85E-02	NaN	PABPC1
NAD Salvage Pathway II	4,53E-01	3,85E-02	NaN	NT5E
Cellular Effects of Sildenafil (Viagra)	4,42E-01	2,33E-02	NaN	ACTG1,PDIA3,MYH9
IL-8 Signaling	4,39E-01	2,17E-02	NaN	IQGAP1,GNAI2,MMP2,LASP1
Pyrimidine Ribonucleotides Interconversion	4,15E-01	3,45E-02	NaN	NME1
Breast Cancer Regulation by Stathmin1	4,08E-01	2,09E-02	NaN	GNAI2,TUBB3,TUBB,TUBA1C
Role of p14/p19ARF in Tumor Suppression	4,04E-01	3,33E-02	NaN	NPM1
Pyrimidine Ribonucleotides De Novo Biosynthesis	3,93E-01	3,23E-02	NaN	NME1
GPCR-Mediated Nutrient Sensing in Enteroendocrine Cells	3,9E-01	2,38E-02	NaN	GNAI2,PDIA3
Cytotoxic T Lymphocyte-mediated Apoptosis of Target Cells	3,82E-01	3,12E-02	NaN	CYCS
Fatty Acid β-oxidation I	3,82E-01	3,12E-02	NaN	SCP2
Synaptic Long Term Depression	3,77E-01	2,11E-02	NaN	PRDX6,GNAI2,PDIA3
α-Adrenergic Signaling	3,72E-01	2,3E-02	NaN	GNAI2,PYGB
TGF-β Signaling	3,72E-01	2,3E-02	NaN	INHBA,SERPINE1
CTLA4 Signaling in Cytotoxic T Lymphocytes	3,66E-01	2,27E-02	NaN	CLTA,CLTC
TWEAK Signaling	3,63E-01	2,94E-02	NaN	CYCS
IL-17A Signaling in Fibroblasts	3,53E-01	2,86E-02	NaN	MMP1
Thyroid Hormone Metabolism II (via Conjugation and/or Degradation)	3,53E-01	2,86E-02	NaN	EXT2
Factors Promoting Cardiogenesis in Vertebrates	3,44E-01	2,17E-02	NaN	TGFBR3,BMP1
Stearate Biosynthesis I (Animals)	3,44E-01	2,78E-02	NaN	FASN
Xenobiotic Metabolism Signaling	3,3E-01	1,85E-02	NaN	GSTO1,SOD3,HSP90B1,HSP90AB1,HSP90AA1
p53 Signaling	3,14E-01	2,04E-02	NaN	SERPINE2,THBS1
Role of PKR in Interferon Induction and Antiviral Response	3,12E-01	2,5E-02	NaN	CYCS
Neuroprotective Role of THOP1 in Alzheimer's Disease	3,12E-01	2,5E-02	NaN	YWHAE
UVC-Induced MAPK Signaling	2,97E-01	2,38E-02	NaN	SMPD1
MSP-RON Signaling Pathway	2,7E-01	2,17E-02	NaN	ACTG1
phagosome formation	2,66E-01	1,83E-02	NaN	FN1,PDIA3
Endothelin-1 Signaling	2,63E-01	1,74E-02	NaN	PRDX6,GNAI2,PDIA3
Role of Macrophages, Fibroblasts and Endothelial Cells in Rheumatoid Arthritis	2,63E-01	1,69E-02	NaN	MMP3,FN1,C5,PDIA3,MMP1
Type I Diabetes Mellitus Signaling	2,62E-01	1,82E-02	NaN	HSPD1,CYCS
Role of Tissue Factor in Cancer	2,62E-01	1,82E-02	NaN	MMP1,P4HB
Corticotropin Releasing Hormone Signaling	2,58E-01	1,8E-02	NaN	GNAI2,KRT1
TNFR1 Signaling	2,52E-01	2,04E-02	NaN	CYCS
AMPK Signaling	2,42E-01	1,68E-02	NaN	FASN,EEF2,AK2
Type II Diabetes Mellitus Signaling	2,36E-01	1,71E-02	NaN	SMPD1,PKM
CD27 Signaling in Lymphocytes	2,36E-01	1,92E-02	NaN	CYCS
PTEN Signaling	2,33E-01	1,69E-02	NaN	TGFBR3,YWHAH
P2Y Purigenic Receptor Signaling Pathway	2,29E-01	1,68E-02	NaN	GNAI2,PDIA3
Lymphotoxin β Receptor Signaling	2,25E-01	1,85E-02	NaN	CYCS
Role of IL-17A in Arthritis	2,25E-01	1,85E-02	NaN	MMP1
Nicotine Degradation III	2,25E-01	1,85E-02	NaN	EXT2
Wnt/Ca+ pathway	2,16E-01	1,79E-02	NaN	PDIA3
Nur77 Signaling in T Lymphocytes	2,11E-01	1,75E-02	NaN	CYCS
Melatonin Degradation I	2,11E-01	1,75E-02	NaN	EXT2

## Sheet: A MSC IRL
© 2000-2016 QIAGEN. All rights reserved.
Ingenuity Canonical Pathways	-log(p-value)	Ratio	z-score	Molecules
Remodeling of Epithelial Adherens Junctions	1,47E01	2,94E-01	NaN	IQGAP1,ACTR2,ARPC3,VCL,TUBB,TUBB6,ACTN1,TUBA1C,NME1,ARPC1B,ACTR3,TUBB4B,ARPC2,RAB5C,ARPC5,RAB7A,TUBA1A,ACTB,TUBB2B,ACTN4
Actin Cytoskeleton Signaling	1,28E01	1,43E-01	NaN	IQGAP1,CDC42,ACTR2,PDGFD,VCL,ARPC1B,MYH9,ARPC5,MYH14,FN1,CFL1,PFN1,ACTB,CYFIP1,ITGB1,ACTN4,TLN1,ARPC3,RRAS2,FLNA,EZR,MYL12A,MSN,ACTN1,MYL9,ACTR3,CFL2,RDX,ARPC2,GSN,ITGA5
Epithelial Adherens Junction Signaling	1,23E01	1,71E-01	NaN	IQGAP1,CDH2,CDC42,ACTR2,VCL,TUBB6,TUBA1C,ARPC1B,MYH9,ARPC5,MYH14,TUBA1A,ACTB,ACTN4,ARPC3,RRAS2,TUBB,JUP,ACTN1,MYL9,ACTR3,TUBB4B,ARPC2,TUBB2B,RAP1B
Hepatic Fibrosis / Hepatic Stellate Cell Activation	1,16E01	1,48E-01	NaN	IGFBP4,PDGFD,TGFB1,MMP2,COL6A1,COL1A1,MYH9,A2M,COL12A1,MYH14,FN1,IGFBP3,VEGFC,COL6A3,COL3A1,COL1A2,MYL9,COL6A2,COL5A1,TIMP2,COL5A2,IL18RAP,COL4A2,TIMP1,SERPINE1,BAX,MMP1
EIF2 Signaling	1,15E01	1,46E-01	NaN	UBA52,EIF3B,EIF3I,RPL12,RPS19,RPL5,RPS15A,RPS11,EIF4A1,RPS3A,RPL14,RPL19,RRAS2,RPL11,RPS18,RPL22,RPS14,RPS12,RPS3,RPSA,RPS16,RPL7,RPLP0,RPL18,RPS4X,EIF3F,RPL10A
RhoGDI Signaling	1,14E01	1,5E-01	NaN	CDH2,CDC42,ACTR2,GNA11,GDI2,GNB1,ARPC1B,ARPC5,GNAI2,CFL1,ACTB,ITGB1,ARHGDIA,GDI1,ARPC3,GNB2L1,EZR,MYL12A,MSN,MYL9,ACTR3,CD44,RDX,CFL2,ARPC2,ITGA5
Signaling by Rho Family GTPases	1,12E01	1,28E-01	NaN	IQGAP1,CDH2,CDC42,GNA11,ACTR2,GNB1,ARPC1B,VIM,ARPC5,GNAI2,CFL1,SEPT11,ACTB,CYFIP1,ITGB1,ARPC3,GNB2L1,EZR,MYL12A,MSN,MYL9,ACTR3,SEPT2,STMN1,CFL2,RDX,ARPC2,SEPT7,SEPT9,ITGA5
Clathrin-mediated Endocytosis Signaling	1,07E01	1,41E-01	NaN	CDC42,ACTR2,PDGFD,ARPC1B,RAB5C,ARPC5,RAB7A,ITGB6,ACTB,HSPA8,ITGB1,RAB11B,VEGFC,TFRC,ALB,SH3GL1,ARPC3,CTTN,CLTC,ACTR3,ARPC2,LYZ,CLTA,CLU,AP2M1,ITGA5
Glycolysis I	9,13E00	4E-01	NaN	TPI1,PGAM1,ENO2,PGK1,ALDOC,PKM,GAPDH,ALDOA,ENO1,GPI
Gluconeogenesis I	9,13E00	4E-01	NaN	PGAM1,ENO2,PGK1,ALDOC,GAPDH,ALDOA,MDH2,ENO1,MDH1,GPI
Axonal Guidance Signaling	9E00	8,76E-02	NaN	CDC42,GNA11,ACTR2,PDGFD,MMP2,PAPPA,TUBB6,GNB1,TUBA1C,ADAM10,ARPC1B,ARPC5,GNAI2,TUBA1A,CFL1,PFN1,ITGB1,SEMA7A,ADAM12,VEGFC,ARPC3,RRAS2,GNB2L1,TUBB,MYL12A,DPYSL2,MYL9,ACTR3,CFL2,ADAMTS1,TUBB4B,ARPC2,BMP1,NRP1,TUBB2B,RAP1B,PDIA3,ITGA5
RhoA Signaling	8,75E00	1,56E-01	NaN	ACTR2,ARPC3,EZR,MYL12A,MSN,MYL9,ARPC1B,ACTR3,SEPT2,RDX,CFL2,ARPC2,ARPC5,CFL1,SEPT7,PFN1,ACTB,SEPT11,SEPT9
Protein Ubiquitination Pathway	8,28E00	1,06E-01	NaN	PSMB6,UBA1,HSPD1,PSMD6,PSMA3,PSMB5,PSMB1,PSMA7,HSPA8,PSMB7,PSMA2,PSMB2,PSMA1,HSP90AA1,PSMA5,PSMA4,HSP90B1,UBE2V1,PSMA6,UBE2N,HSPB1,HSPA4,HSPA9,PSMB4,HSPA5,PSMD1,HSP90AB1
Regulation of Actin-based Motility by Rho	8,25E00	1,76E-01	NaN	CDC42,ACTR2,ARPC3,MYL12A,MYL9,ARPC1B,ACTR3,ARPC2,ARPC5,CFL1,PFN1,ACTB,GSN,ITGB1,ARHGDIA,ITGA5
Germ Cell-Sertoli Cell Junction Signaling	8,22E00	1,31E-01	NaN	IQGAP1,CDH2,CDC42,RRAS2,TGFB1,VCL,TUBB,TUBB6,JUP,ACTN1,TUBA1C,TUBB4B,CFL2,A2M,TUBA1A,CFL1,ACTB,GSN,ITGB1,TUBB2B,ACTN4
Inhibition of Matrix Metalloproteases	8,12E00	2,82E-01	NaN	A2M,MMP3,MMP2,MMP19,THBS2,HSPG2,ADAM12,TIMP1,ADAM10,MMP1,TIMP2
Regulation of eIF4 and p70S6K Signaling	7,43E00	1,3E-01	NaN	MTOR,RRAS2,RPS18,EIF3B,EIF3I,RPS14,RPS12,RPS3,RPSA,RPS19,RPS16,ITGB1,RPS15A,RPS11,RPS4X,EIF4A1,RPS3A,ITGA5,EIF3F
Integrin Signaling	7,12E00	1,09E-01	NaN	CDC42,ACTR2,TLN1,RRAS2,ARPC3,VCL,CTTN,MYL12A,MYL9,ACTN1,ARPC1B,ACTR3,ARPC2,ARPC5,CAV1,ITGB6,ACTB,ITGB1,RAP1B,ACTN4,ITGA5,CAPNS1
ILK Signaling	7,06E00	1,13E-01	NaN	FLNB,CDC42,MTOR,VCL,FLNA,DSP,MYL9,ACTN1,CFL2,MYH9,VIM,MYH14,FN1,CFL1,ITGB6,ACTB,ITGB1,FLNC,ACTN4,VEGFC,NACA
Caveolar-mediated Endocytosis Signaling	7,03E00	1,83E-01	NaN	FLNB,FLNA,PTRF,COPG1,RAB5C,CAV1,ITGB6,ACTB,ITGB1,FLNC,ITGA5,ARCN1,ALB
Ephrin Receptor Signaling	6,88E00	1,15E-01	NaN	CDC42,ACTR2,GNA11,PDGFD,RRAS2,ARPC3,GNB2L1,GNB1,ADAM10,ARPC1B,ACTR3,CFL2,ARPC2,ARPC5,GNAI2,CFL1,ITGB1,RAP1B,VEGFC,ITGA5
Virus Entry via Endocytic Pathways	6,67E00	1,57E-01	NaN	FLNB,CDC42,RRAS2,FLNA,CLTC,CAV1,CLTA,ITGB6,ACTB,ITGB1,FLNC,AP2M1,ITGA5,TFRC
Leukocyte Extravasation Signaling	6,59E00	1,06E-01	NaN	CDC42,MMP2,VCL,CTTN,EZR,MSN,ACTN1,EDIL3,CD44,RDX,TIMP2,MMP3,GNAI2,MMP19,ACTB,ITGB1,RAP1B,TIMP1,ACTN4,ITGA5,MMP1
Rac Signaling	6,59E00	1,44E-01	NaN	IQGAP1,CDC42,ACTR2,RRAS2,ARPC3,ARPC1B,ACTR3,CD44,CFL2,ARPC2,ARPC5,CFL1,CYFIP1,ITGB1,ITGA5
14-3-3-mediated Signaling	5,91E00	1,28E-01	NaN	YWHAQ,YWHAG,RRAS2,TUBB,TUBB6,TUBA1C,YWHAE,TUBB4B,VIM,TUBA1A,TUBB2B,PDIA3,BAX,YWHAZ,YWHAB
mTOR Signaling	5,71E00	1,01E-01	NaN	MTOR,RRAS2,RPS18,EIF4B,EIF3B,EIF3I,RPS14,RPS12,RPS3,RPSA,RPS19,RPS16,RPS15A,RPS11,RPS4X,EIF4A1,RPS3A,VEGFC,EIF3F
Actin Nucleation by ARP-WASP Complex	5,44E00	1,79E-01	NaN	ARPC2,ARPC5,CDC42,ACTR2,RRAS2,ARPC3,ITGB1,ACTR3,ARPC1B,ITGA5
Sertoli Cell-Sertoli Cell Junction Signaling	5,44E00	1,01E-01	NaN	CDC42,RRAS2,VCL,TUBB,TUBB6,JUP,ACTN1,TUBA1C,TUBB4B,SPTBN1,A2M,TUBA1A,ACTB,ITGB1,TUBB2B,ACTN4,ITGA5,SPTAN1
phagosome maturation	5,07E00	1,17E-01	NaN	DYNC1H1,TUBB,TUBB6,TUBA1C,PRDX1,TUBB4B,CALR,PRDX6,RAB5C,TUBA1A,RAB7A,TUBB2B,CANX,PRDX2
Unfolded protein response	4,7E00	1,67E-01	NaN	CALR,HSPA4,HSPA9,HSPA8,HSP90B1,HSPA5,CANX,VCP,P4HB
Agrin Interactions at Neuromuscular Junction	4,61E00	1,45E-01	NaN	CDC42,RRAS2,CTTN,ACTB,ITGB1,LAMB1,LAMC1,DAG1,ITGA5,LAMA2
Regulation of Cellular Mechanics by Calpain Protease	4,51E00	1,58E-01	NaN	RRAS2,TLN1,VCL,ITGB1,EZR,ACTN1,ACTN4,ITGA5,CAPNS1
TCA Cycle II (Eukaryotic)	4,46E00	2,61E-01	NaN	DLD,FH,CS,DLST,MDH2,MDH1
fMLP Signaling in Neutrophils	4,22E00	1,11E-01	NaN	ARPC2,ARPC5,GNAI2,CDC42,ACTR2,CALM1 (includes others),RRAS2,ARPC3,GNB2L1,GNB1,ACTR3,ARPC1B
Fcγ Receptor-mediated Phagocytosis in Macrophages and Monocytes	4,17E00	1,18E-01	NaN	ARPC2,ARPC5,CDC42,ACTR2,ARPC3,TLN1,ACTB,EZR,RAB11B,ACTR3,ARPC1B
UDP-N-acetyl-D-galactosamine Biosynthesis II	4,13E00	4,44E-01	NaN	UAP1,PGM3,HK1,GPI
IGF-1 Signaling	4E00	1,13E-01	NaN	IGFBP4,YWHAQ,CYR61,RRAS2,YWHAG,IGFBP7,IGFBP3,YWHAE,YWHAZ,YWHAB,IGFBP6
Acute Phase Response Signaling	3,98E00	8,88E-02	NaN	MTOR,RRAS2,C3,SERPINF1,HNRNPK,C1R,A2M,FN1,SERPINE1,C1S,AHSG,SERPING1,ITIH2,SERPIND1,ALB
Agranulocyte Adhesion and Diapedesis	3,96E00	8,47E-02	NaN	MMP2,EZR,MSN,MYL9,RDX,MYH9,MMP3,MYH14,GLG1,GNAI2,FN1,MMP19,ACTB,ITGB1,ITGA5,MMP1
PI3K/AKT Signaling	3,68E00	9,76E-02	NaN	YWHAQ,MTOR,RRAS2,YWHAG,ITGB1,HSP90B1,HSP90AB1,YWHAE,YWHAZ,HSP90AA1,YWHAB,ITGA5
Atherosclerosis Signaling	3,64E00	9,68E-02	NaN	PRDX6,LYZ,MMP3,GLG1,PDGFD,TGFB1,CLU,COL3A1,COL1A2,COL1A1,MMP1,ALB
Myc Mediated Apoptosis Signaling	3,64E00	1,38E-01	NaN	YWHAQ,RRAS2,YWHAG,BAX,CYCS,YWHAE,YWHAZ,YWHAB
Role of Tissue Factor in Cancer	3,51E00	1E-01	NaN	CDC42,MTOR,CFL1,GNA11,CYR61,RRAS2,ITGB1,VEGFC,MMP1,CFL2,P4HB
Cdc42 Signaling	3,5E00	8,38E-02	NaN	IQGAP1,CDC42,ACTR2,ARPC3,MYL12A,MYL9,ACTR3,ARPC1B,CFL2,ARPC2,ARPC5,CFL1,ITGB1,ITGA5
Paxillin Signaling	3,21E00	9,9E-02	NaN	CDC42,RRAS2,TLN1,VCL,ITGB6,ACTB,ITGB1,ACTN1,ACTN4,ITGA5
HIF1α Signaling	3,17E00	9,8E-02	NaN	MMP3,RRAS2,MMP2,MMP19,LDHA,HSP90AA1,APEX1,VEGFC,MMP1,LDHB
NRF2-mediated Oxidative Stress Response	3,17E00	7,78E-02	NaN	RRAS2,CBR1,ERP29,TXNRD1,PPIB,PRDX1,GSTO1,SOD3,CCT7,ACTB,CAT,AKR1A1,VCP,GSTP1
Semaphorin Signaling in Neurons	3,13E00	1,32E-01	NaN	CFL1,ITGB1,NRP1,DPYSL3,SEMA7A,DPYSL2,CFL2
Huntington's Disease Signaling	3,03E00	6,99E-02	NaN	GNA11,MTOR,GNB2L1,PENK,CLTC,GNB1,CYCS,HSPA9,HSPA4,CLTA,HSPA8,HSPA5,BAX,CTSD,ATP5B,CAPNS1
PAK Signaling	3,01E00	1,01E-01	NaN	CDC42,CFL1,PDGFD,RRAS2,ITGB1,MYL12A,MYL9,ITGA5,CFL2
Ephrin B Signaling	2,96E00	1,1E-01	NaN	GNAI2,CDC42,CFL1,GNA11,GNB2L1,HNRNPK,GNB1,CFL2
Intrinsic Prothrombin Activation Pathway	2,9E00	1,72E-01	NaN	COL3A1,COL1A2,COL1A1,F5,SERPINC1
Gap Junction Signaling	2,78E00	7,74E-02	NaN	GNAI2,TUBA1A,CAV1,RRAS2,ACTB,TUBB,DBN1,TUBB6,TUBB2B,PDIA3,TUBA1C,TUBB4B
Sucrose Degradation V (Mammalian)	2,77E00	3,33E-01	NaN	TPI1,ALDOC,ALDOA
Protein Kinase A Signaling	2,76E00	5,7E-02	NaN	FLNB,YWHAQ,YWHAG,CALM1 (includes others),TGFB1,GNB2L1,FLNA,MYL12A,GNB1,H3F3A/H3F3B,HIST1H1E,HIST1H1B,MYL9,YWHAE,GNAI2,PYGB,RAP1B,PDIA3,FLNC,YWHAZ,APEX1,YWHAB
Granulocyte Adhesion and Diapedesis	2,76E00	7,34E-02	NaN	MMP2,EZR,MSN,RDX,HSPB1,GNAI2,MMP3,GLG1,MMP19,ITGB1,IL18RAP,ITGA5,MMP1
p70S6K Signaling	2,66E00	8,4E-02	NaN	GNAI2,YWHAQ,MTOR,RRAS2,YWHAG,PDIA3,YWHAE,YWHAZ,EEF2,YWHAB
Granzyme A Signaling	2,66E00	2E-01	NaN	HIST1H1E,HIST1H1B,NME1,APEX1
Hypoxia Signaling in the Cardiovascular System	2,61E00	1,08E-01	NaN	HSP90B1,UBE2V1,LDHA,UBE2N,HSP90AB1,HSP90AA1,P4HB
Coagulation System	2,53E00	1,43E-01	NaN	A2M,SERPINE1,F5,SERPINC1,SERPIND1
Macropinocytosis Signaling	2,5E00	1,03E-01	NaN	CDC42,PDGFD,RRAS2,ITGB6,ITGB1,ACTN4,ITGA5
Pentose Phosphate Pathway	2,49E00	2,73E-01	NaN	TKT,PGLS,TALDO1
Breast Cancer Regulation by Stathmin1	2,47E00	6,81E-02	NaN	CDC42,CALM1 (includes others),RRAS2,GNB2L1,TUBB,TUBB6,GNB1,TUBA1C,TUBB4B,STMN1,GNAI2,TUBA1A,TUBB2B
Neuregulin Signaling	2,44E00	9,09E-02	NaN	MTOR,RRAS2,ITGB1,HSP90B1,DCN,HSP90AB1,HSP90AA1,ITGA5
Antigen Presentation Pathway	2,42E00	1,35E-01	NaN	CALR,PSMB6,PDIA3,CANX,PSMB5
Complement System	2,42E00	1,35E-01	NaN	MASP1,C3,C1S,C1R,SERPING1
Aldosterone Signaling in Epithelial Cells	2,37E00	7,24E-02	NaN	HSPB1,HSPA4,HSPA9,HSPA8,HSP90B1,HSPA5,HSPD1,PDIA3,HSP90AB1,HSP90AA1,AHCY
2-ketoglutarate Dehydrogenase Complex	2,33E00	5E-01	NaN	DLD,DLST
tRNA Charging	2,32E00	1,28E-01	NaN	GARS,TARS,HARS,DARS,WARS
Glioma Invasiveness Signaling	2,26E00	1,05E-01	NaN	VTN,RRAS2,MMP2,TIMP1,CD44,TIMP2
Lipid Antigen Presentation by CD1	2,23E00	1,54E-01	NaN	CALR,PDIA3,CANX,AP2M1
eNOS Signaling	2,12E00	7,04E-02	NaN	HSPA4,HSPA9,CAV1,CALM1 (includes others),HSPA8,HSP90B1,HSPA5,HSP90AB1,HSP90AA1,VEGFC
Serine Biosynthesis	2,12E00	4E-01	NaN	PSAT1,PHGDH
LXR/RXR Activation	2,1E00	7,44E-02	NaN	LYZ,VTN,C3,SERPINF1,CLU,IL18RAP,AHSG,PLTP,ALB
Chondroitin Sulfate Degradation (Metazoa)	2,09E00	2E-01	NaN	HEXB,HEXA,CD44
Glutathione-mediated Detoxification	2,05E00	1,38E-01	NaN	GSTO1,GGH,ANPEP,GSTP1
ERK5 Signaling	2,04E00	9,52E-02	NaN	YWHAQ,RRAS2,YWHAG,YWHAE,YWHAZ,YWHAB
Dermatan Sulfate Degradation (Metazoa)	2,01E00	1,88E-01	NaN	HEXB,HEXA,CD44
Pyrimidine Ribonucleotides De Novo Biosynthesis	1,95E00	1,29E-01	NaN	CAD,CANT1,NUDT5,NME1
Pyruvate Fermentation to Lactate	1,95E00	3,33E-01	NaN	LDHA,LDHB
Pentose Phosphate Pathway (Non-oxidative Branch)	1,95E00	3,33E-01	NaN	TKT,TALDO1
UDP-N-acetyl-D-glucosamine Biosynthesis II	1,95E00	3,33E-01	NaN	UAP1,PGM3
Rapoport-Luebering Glycolytic Shunt	1,95E00	3,33E-01	NaN	PGAM1,MINPP1
RAN Signaling	1,93E00	1,76E-01	NaN	IPO5,KPNB1,TNPO1
Bladder Cancer Signaling	1,92E00	8,05E-02	NaN	MMP3,RRAS2,MMP2,MMP19,THBS1,VEGFC,MMP1
FAK Signaling	1,92E00	8,05E-02	NaN	RRAS2,TLN1,VCL,ACTB,ITGB1,ITGA5,CAPNS1
Cell Cycle: G2/M DNA Damage Checkpoint Regulation	1,9E00	1,02E-01	NaN	YWHAQ,YWHAG,YWHAE,YWHAZ,YWHAB
G Beta Gamma Signaling	1,89E00	7,95E-02	NaN	GNAI2,CDC42,CAV1,GNA11,RRAS2,GNB2L1,GNB1
Glucocorticoid Receptor Signaling	1,89E00	5,45E-02	NaN	RRAS2,TGFB1,HSP90B1,KRT32,ANXA1,A2M,HSPA9,HSPA4,ACTB,HSPA8,HSPA5,SERPINE1,HSP90AB1,HSP90AA1,MMP1
Androgen Signaling	1,85E00	7,21E-02	NaN	CALR,GNAI2,HSPA4,GNA11,CALM1 (includes others),GNB2L1,GNB1,HSP90AA1
Oncostatin M Signaling	1,81E00	1,18E-01	NaN	MMP3,CHI3L1,RRAS2,MMP1
Superpathway of Serine and Glycine Biosynthesis I	1,81E00	2,86E-01	NaN	PSAT1,PHGDH
GDP-glucose Biosynthesis	1,81E00	2,86E-01	NaN	PGM3,HK1
Aspartate Degradation II	1,81E00	2,86E-01	NaN	MDH2,MDH1
VEGF Signaling	1,79E00	7,61E-02	NaN	RRAS2,VCL,ACTB,ACTN1,ACTN4,YWHAE,VEGFC
IL-8 Signaling	1,77E00	5,98E-02	NaN	IQGAP1,GNAI2,MTOR,RRAS2,MMP2,GNB2L1,GNB1,MYL9,BAX,LASP1,VEGFC
ERK/MAPK Signaling	1,73E00	5,88E-02	NaN	HSPB1,YWHAQ,RRAS2,YWHAG,TLN1,ITGB1,RAP1B,H3F3A/H3F3B,YWHAZ,YWHAB,ITGA5
Aryl Hydrocarbon Receptor Signaling	1,72E00	6,43E-02	NaN	HSPB1,GSTO1,TGFB1,HSP90B1,BAX,HSP90AB1,GSTP1,CTSD,HSP90AA1
CD28 Signaling in T Helper Cells	1,7E00	6,78E-02	NaN	ARPC2,ARPC5,CDC42,ACTR2,CALM1 (includes others),ARPC3,ACTR3,ARPC1B
Airway Pathology in Chronic Obstructive Pulmonary Disease	1,69E00	2,5E-01	NaN	MMP2,MMP1
Glucose and Glucose-1-phosphate Degradation	1,69E00	2,5E-01	NaN	PGM3,HK1
Superoxide Radicals Degradation	1,69E00	2,5E-01	NaN	SOD3,CAT
Endoplasmic Reticulum Stress Pathway	1,68E00	1,43E-01	NaN	CALR,HSP90B1,HSPA5
Docosahexaenoic Acid (DHA) Signaling	1,61E00	1,03E-01	NaN	SERPINF1,APP,BAX,CYCS
Mitochondrial Dysfunction	1,6E00	5,85E-02	NaN	VDAC1,PARK7,CAT,VDAC2,ATP5A1,APP,CYCS,MT-CO2,PRDX3,ATP5B
Cardiac Hypertrophy Signaling	1,57E00	5,38E-02	NaN	HSPB1,GNAI2,MTOR,GNA11,CALM1 (includes others),RRAS2,TGFB1,GNB2L1,MYL12A,GNB1,PDIA3,MYL9
Acetyl-CoA Biosynthesis III (from Citrate)	1,54E00	1E00	NaN	ACLY
Glutamate Removal from Folates	1,54E00	1E00	NaN	GGH
Asparagine Biosynthesis I	1,54E00	1E00	NaN	ASNS
Mechanisms of Viral Exit from Host Cells	1,54E00	9,76E-02	NaN	SH3GL1,ACTB,CHMP4B,LMNB2
Prostate Cancer Signaling	1,53E00	7,32E-02	NaN	MTOR,RRAS2,HSP90B1,HSP90AB1,GSTP1,HSP90AA1
Glycogen Degradation II	1,5E00	2E-01	NaN	PYGB,PGM3
Calcium Signaling	1,5E00	5,62E-02	NaN	CALR,TPM3,MYH14,CALM1 (includes others),TPM4,RAP1B,MYL9,TPM2,TPM1,MYH9
HIPPO signaling	1,44E00	6,98E-02	NaN	YWHAQ,YWHAG,YWHAE,YWHAZ,YWHAB,CD44
α-Adrenergic Signaling	1,42E00	6,9E-02	NaN	GNAI2,PYGB,CALM1 (includes others),RRAS2,GNB2L1,GNB1
Phospholipase C Signaling	1,4E00	5,06E-02	NaN	PEBP1,CALM1 (includes others),RRAS2,GNB2L1,ITGB1,MYL12A,GNB1,RAP1B,MYL9,ITGA5,MARCKS,AHNAK
Apoptosis Signaling	1,38E00	6,74E-02	NaN	RRAS2,BAX,CYCS,CAPNS1,LMNA,SPTAN1
Glycogen Degradation III	1,35E00	1,67E-01	NaN	PYGB,PGM3
Ephrin A Signaling	1,32E00	8,33E-02	NaN	CDC42,CFL1,ADAM10,CFL2
Pyrimidine Ribonucleotides Interconversion	1,31E00	1,03E-01	NaN	CANT1,NUDT5,NME1
Role of Osteoblasts, Osteoclasts and Chondrocytes in Rheumatoid Arthritis	1,3E00	5,02E-02	NaN	MMP3,CALM1 (includes others),TGFB1,GSN,ITGB1,IL18RAP,BMP1,COL1A1,DKK1,ITGA5,MMP1
CCR3 Signaling in Eosinophils	1,3E00	5,98E-02	NaN	GNAI2,CFL1,CALM1 (includes others),RRAS2,GNB2L1,GNB1,CFL2
Tight Junction Signaling	1,3E00	5,39E-02	NaN	RAB13,CDC42,MYH14,TGFB1,VCL,ACTB,MYL9,MYH9,SPTAN1
PPAR Signaling	1,28E00	6,38E-02	NaN	PDGFD,RRAS2,HSP90B1,IL18RAP,HSP90AB1,HSP90AA1
UDP-D-xylose and UDP-D-glucuronate Biosynthesis	1,25E00	5E-01	NaN	UGDH
Uridine-5'-phosphate Biosynthesis	1,25E00	5E-01	NaN	CAD
Spermidine Biosynthesis I	1,25E00	5E-01	NaN	SRM
Glutamate Biosynthesis II	1,25E00	5E-01	NaN	GLUD1
Glutamate Degradation X	1,25E00	5E-01	NaN	GLUD1
Colanic Acid Building Blocks Biosynthesis	1,23E00	1,43E-01	NaN	GPI,UGDH
Amyotrophic Lateral Sclerosis Signaling	1,21E00	6,12E-02	NaN	RAB5C,CAT,BAX,CYCS,VEGFC,CAPNS1
Superpathway of Methionine Degradation	1,21E00	9,38E-02	NaN	DLD,MAT2A,AHCY
HER-2 Signaling in Breast Cancer	1,18E00	6,58E-02	NaN	CDC42,RRAS2,MMP2,ITGB6,ITGB1
Nitric Oxide Signaling in the Cardiovascular System	1,18E00	6E-02	NaN	CAV1,CALM1 (includes others),HSP90B1,HSP90AB1,HSP90AA1,VEGFC
Telomere Extension by Telomerase	1,18E00	1,33E-01	NaN	HNRNPA1,HNRNPA2B1
nNOS Signaling in Skeletal Muscle Cells	1,18E00	1,33E-01	NaN	CALM1 (includes others),DAG1
Vitamin-C Transport	1,18E00	1,33E-01	NaN	GSTO1,TXNRD1
FXR/RXR Activation	1,14E00	5,51E-02	NaN	VTN,C3,SERPINF1,CLU,AHSG,PLTP,ALB
Inhibition of Angiogenesis by TSP1	1,14E00	8,82E-02	NaN	TGFB1,HSPG2,THBS1
Granzyme B Signaling	1,13E00	1,25E-01	NaN	CYCS,LMNB2
Extrinsic Prothrombin Activation Pathway	1,13E00	1,25E-01	NaN	F5,SERPINC1
Methylglyoxal Degradation III	1,13E00	1,25E-01	NaN	AKR1B1,AKR1A1
Parkinson's Signaling	1,13E00	1,25E-01	NaN	PARK7,CYCS
Cellular Effects of Sildenafil (Viagra)	1,12E00	5,43E-02	NaN	MYH14,CALM1 (includes others),ACTB,MYL12A,PDIA3,MYL9,MYH9
Heparan Sulfate Biosynthesis	1,1E00	7,02E-02	NaN	PRDX6,EXT1,EXT2,XYLT1
Diphthamide Biosynthesis	1,08E00	3,33E-01	NaN	EEF2
Trehalose Degradation II (Trehalase)	1,08E00	3,33E-01	NaN	HK1
NADH Repair	1,08E00	3,33E-01	NaN	GAPDH
5-aminoimidazole Ribonucleotide Biosynthesis I	1,08E00	3,33E-01	NaN	PFAS
D-glucuronate Degradation I	1,08E00	3,33E-01	NaN	AKR1A1
Thyroid Hormone Biosynthesis	1,08E00	3,33E-01	NaN	CTSD
S-adenosyl-L-methionine Biosynthesis	1,08E00	3,33E-01	NaN	MAT2A
Methionine Degradation I (to Homocysteine)	1,08E00	1,18E-01	NaN	MAT2A,AHCY
phagosome formation	1,04E00	5,5E-02	NaN	FN1,VTN,ITGB1,PDIA3,ITGA5,MARCKS
TR/RXR Activation	1,02E00	5,88E-02	NaN	MTOR,COL6A3,TRH,ENO1,RAB3B
Glutathione Redox Reactions I	9,96E-01	1,05E-01	NaN	PRDX6,GPX8
Cysteine Biosynthesis III (mammalia)	9,96E-01	1,05E-01	NaN	MAT2A,AHCY
TGF-β Signaling	9,87E-01	5,75E-02	NaN	INHBA,CDC42,RRAS2,TGFB1,SERPINE1
Antiproliferative Role of Somatostatin Receptor 2	9,78E-01	6,35E-02	NaN	RRAS2,GNB2L1,GNB1,RAP1B
Arsenate Detoxification I (Glutaredoxin)	9,61E-01	2,5E-01	NaN	GSTO1
Uracil Degradation II (Reductive)	9,61E-01	2,5E-01	NaN	DPYSL2
Heme Degradation	9,61E-01	2,5E-01	NaN	BLVRA
Branched-chain α-keto acid Dehydrogenase Complex	9,61E-01	2,5E-01	NaN	DLD
Ascorbate Recycling (Cytosolic)	9,61E-01	2,5E-01	NaN	GSTO1
Glutathione Redox Reactions II	9,61E-01	2,5E-01	NaN	PDIA3
Thymine Degradation	9,61E-01	2,5E-01	NaN	DPYSL2
N-acetylglucosamine Degradation II	9,61E-01	2,5E-01	NaN	NAGK
Mitotic Roles of Polo-Like Kinase	9,23E-01	6,06E-02	NaN	TGFB1,HSP90B1,HSP90AB1,HSP90AA1
Death Receptor Signaling	9,11E-01	5,43E-02	NaN	HSPB1,ACTB,CYCS,LMNA,SPTAN1
Pyrimidine Deoxyribonucleotides De Novo Biosynthesis I	8,89E-01	9,09E-02	NaN	DUT,NME1
CCR5 Signaling in Macrophages	8,72E-01	5,8E-02	NaN	GNAI2,CALM1 (includes others),GNB2L1,GNB1
Creatine-phosphate Biosynthesis	8,7E-01	2E-01	NaN	CKB
Pentose Phosphate Pathway (Oxidative Branch)	8,7E-01	2E-01	NaN	PGLS
Tetrahydrofolate Salvage from 5,10-methenyltetrahydrofolate	8,7E-01	2E-01	NaN	MTHFD1
CMP-N-acetylneuraminate Biosynthesis I (Eukaryotes)	8,7E-01	2E-01	NaN	NAGK
2-oxobutanoate Degradation I	8,7E-01	2E-01	NaN	DLD
Folate Polyglutamylation	8,7E-01	2E-01	NaN	MTHFD1
Colorectal Cancer Metastasis Signaling	8,56E-01	4,24E-02	NaN	MMP3,RRAS2,TGFB1,MMP2,MMP19,GNB2L1,GNB1,BAX,VEGFC,MMP1
PPARα/RXRα Activation	8,51E-01	4,47E-02	NaN	GNA11,RRAS2,TGFB1,HSP90B1,IL18RAP,PDIA3,HSP90AB1,HSP90AA1
Renal Cell Carcinoma Signaling	8,4E-01	5,63E-02	NaN	CDC42,RRAS2,TGFB1,FH
Chemokine Signaling	8,4E-01	5,63E-02	NaN	GNAI2,CFL1,CALM1 (includes others),RRAS2
CXCR4 Signaling	8,39E-01	4,61E-02	NaN	GNAI2,GNA11,RRAS2,GNB2L1,MYL12A,GNB1,MYL9
Tumoricidal Function of Hepatic Natural Killer Cells	8,27E-01	8,33E-02	NaN	BAX,CYCS
Arginine Biosynthesis IV	7,97E-01	1,67E-01	NaN	GLUD1
Thioredoxin Pathway	7,97E-01	1,67E-01	NaN	TXNRD1
Glycine Cleavage Complex	7,97E-01	1,67E-01	NaN	DLD
Glycogen Biosynthesis II (from UDP-D-Glucose)	7,97E-01	1,67E-01	NaN	GBE1
NAD Biosynthesis III	7,97E-01	1,67E-01	NaN	NAMPT
GDP-mannose Biosynthesis	7,97E-01	1,67E-01	NaN	GPI
Tec Kinase Signaling	7,89E-01	4,46E-02	NaN	GNAI2,GNA11,ACTB,GNB2L1,ITGB1,GNB1,ITGA5
Heparan Sulfate Biosynthesis (Late Stages)	7,68E-01	6E-02	NaN	PRDX6,EXT1,EXT2
IL-15 Production	7,46E-01	7,41E-02	NaN	TWF1,PTK7
Thrombin Signaling	7,43E-01	4,19E-02	NaN	GNAI2,GNA11,RRAS2,GNB2L1,MYL12A,GNB1,PDIA3,MYL9
HGF Signaling	7,42E-01	4,76E-02	NaN	CDC42,RRAS2,ITGB1,RAP1B,ITGA5
Acetyl-CoA Biosynthesis I (Pyruvate Dehydrogenase Complex)	7,37E-01	1,43E-01	NaN	DLD
Glycoaminoglycan-protein Linkage Region Biosynthesis	7,37E-01	1,43E-01	NaN	XYLT1
Relaxin Signaling	7,24E-01	4,44E-02	NaN	GNAI2,GNA11,GNB2L1,GNB1,RAP1B,APEX1
Histidine Degradation III	6,85E-01	1,25E-01	NaN	MTHFD1
Corticotropin Releasing Hormone Signaling	6,76E-01	4,5E-02	NaN	ARPC5,GNAI2,CALM1 (includes others),KRT1,RAP1B
CREB Signaling in Neurons	6,63E-01	4,09E-02	NaN	GNAI2,GNA11,CALM1 (includes others),RRAS2,GNB2L1,GNB1,PDIA3
Role of Macrophages, Fibroblasts and Endothelial Cells in Rheumatoid Arthritis	6,44E-01	3,72E-02	NaN	MMP3,FN1,PDGFD,CALM1 (includes others),RRAS2,TGFB1,IL18RAP,PDIA3,DKK1,VEGFC,MMP1
Ketolysis	6,39E-01	1,11E-01	NaN	OXCT1
Folate Transformations I	6,39E-01	1,11E-01	NaN	MTHFD1
B Cell Receptor Signaling	6,39E-01	4,02E-02	NaN	CDC42,MTOR,CFL1,CALM1 (includes others),RRAS2,RAP1B,CFL2
IL-6 Signaling	6,25E-01	4,31E-02	NaN	A2M,HSPB1,RRAS2,IL18RAP,COL1A1
Gα12/13 Signaling	6,16E-01	4,27E-02	NaN	CDH2,CDC42,RRAS2,MYL12A,MYL9
G Protein Signaling Mediated by Tubby	6,16E-01	6,06E-02	NaN	GNB2L1,GNB1
UVA-Induced MAPK Signaling	6,15E-01	4,55E-02	NaN	MTOR,RRAS2,PDIA3,CYCS
Role of NFAT in Cardiac Hypertrophy	6E-01	3,91E-02	NaN	GNAI2,CALM1 (includes others),RRAS2,TGFB1,GNB2L1,GNB1,PDIA3
Calcium Transport I	6E-01	1E-01	NaN	ANXA5
Synaptic Long Term Potentiation	5,97E-01	4,2E-02	NaN	GNA11,CALM1 (includes others),RRAS2,RAP1B,PDIA3
P2Y Purigenic Receptor Signaling Pathway	5,97E-01	4,2E-02	NaN	GNAI2,RRAS2,GNB2L1,GNB1,PDIA3
Gαi Signaling	5,88E-01	4,17E-02	NaN	GNAI2,CAV1,RRAS2,GNB2L1,GNB1
IL-1 Signaling	5,82E-01	4,4E-02	NaN	GNAI2,GNA11,GNB2L1,GNB1
Thyroid Hormone Metabolism II (via Conjugation and/or Degradation)	5,79E-01	5,71E-02	NaN	B4GAT1,EXT2
Sperm Motility	5,79E-01	4,13E-02	NaN	PRDX6,TWF1,CALM1 (includes others),PDIA3,PTK7
PCP pathway	5,72E-01	4,76E-02	NaN	HSPB1,PFN1,CTHRC1
Purine Nucleotides De Novo Biosynthesis II	5,64E-01	9,09E-02	NaN	PFAS
autophagy	5,62E-01	5,56E-02	NaN	MTOR,MAP1LC3B
Cell Cycle: G1/S Checkpoint Regulation	5,6E-01	4,69E-02	NaN	RPL5,TGFB1,RPL11
SAPK/JNK Signaling	5,52E-01	4,26E-02	NaN	CDC42,RRAS2,HNRNPK,GNB1
Glioma Signaling	5,42E-01	4,21E-02	NaN	MTOR,PDGFD,CALM1 (includes others),RRAS2
BER pathway	5,32E-01	8,33E-02	NaN	APEX1
Serotonin Degradation	5,24E-01	4,48E-02	NaN	AKR1A1,B4GAT1,EXT2
PI3K Signaling in B Lymphocytes	5,2E-01	3,91E-02	NaN	CALM1 (includes others),RRAS2,C3,PDIA3,CD81
p53 Signaling	5,14E-01	4,08E-02	NaN	SERPINE2,BAX,THBS1,TP53I3
CDK5 Signaling	5,05E-01	4,04E-02	NaN	RRAS2,ITGB1,LAMB1,LAMC1
Telomerase Signaling	5,05E-01	4,04E-02	NaN	RRAS2,HSP90B1,HSP90AB1,HSP90AA1
Antioxidant Action of Vitamin C	5,05E-01	4,04E-02	NaN	PRDX6,GSTO1,TXNRD1,PDIA3
Guanosine Nucleotides Degradation III	5,04E-01	7,69E-02	NaN	NT5E
Role of MAPK Signaling in the Pathogenesis of Influenza	5,02E-01	4,35E-02	NaN	PRDX6,RRAS2,BAX
Neuroprotective Role of THOP1 in Alzheimer's Disease	4,99E-01	5E-02	NaN	APP,YWHAE
Ovarian Cancer Signaling	4,96E-01	3,82E-02	NaN	MTOR,RRAS2,MMP2,CD44,VEGFC
Melatonin Signaling	4,91E-01	4,29E-02	NaN	GNAI2,CALM1 (includes others),PDIA3
GPCR-Mediated Integration of Enteroendocrine Signaling Exemplified by an L Cell	4,81E-01	4,23E-02	NaN	GNAI2,GNA11,PDIA3
Isoleucine Degradation I	4,77E-01	7,14E-02	NaN	DLD
Urate Biosynthesis/Inosine 5'-phosphate Degradation	4,77E-01	7,14E-02	NaN	NT5E
IL-12 Signaling and Production in Macrophages	4,74E-01	3,73E-02	NaN	LYZ,RAB7A,TGFB1,CLU,ALB
IL-17 Signaling	4,71E-01	4,17E-02	NaN	MMP3,RRAS2,TIMP1
NF-κB Activation by Viruses	4,61E-01	4,11E-02	NaN	RRAS2,ITGB1,ITGA5
Leukotriene Biosynthesis	4,53E-01	6,67E-02	NaN	LTA4H
γ-glutamyl Cycle	4,53E-01	6,67E-02	NaN	ANPEP
Role of NFAT in Regulation of the Immune Response	4,41E-01	3,51E-02	NaN	GNAI2,GNA11,CALM1 (includes others),RRAS2,GNB2L1,GNB1
NGF Signaling	4,38E-01	3,74E-02	NaN	CDC42,RRAS2,RAP1B,BAX
VEGF Family Ligand-Receptor Interactions	4,32E-01	3,95E-02	NaN	RRAS2,NRP1,VEGFC
PDGF Signaling	4,23E-01	3,9E-02	NaN	CAV1,PDGFD,RRAS2
Oxidative Phosphorylation	4,23E-01	3,67E-02	NaN	ATP5A1,CYCS,MT-CO2,ATP5B
Synaptic Long Term Depression	4,19E-01	3,52E-02	NaN	PRDX6,GNAI2,GNA11,RRAS2,PDIA3
Adenosine Nucleotides Degradation II	4,1E-01	5,88E-02	NaN	NT5E
nNOS Signaling in Neurons	4,1E-01	4,26E-02	NaN	CALM1 (includes others),CAPNS1
Reelin Signaling in Neurons	4,06E-01	3,8E-02	NaN	ITGB1,APP,ITGA5
Acute Myeloid Leukemia Signaling	4,06E-01	3,8E-02	NaN	MTOR,RRAS2,JUP
Regulation of IL-2 Expression in Activated and Anergic T Lymphocytes	4,06E-01	3,8E-02	NaN	CALM1 (includes others),RRAS2,TGFB1
Ceramide Signaling	3,97E-01	3,75E-02	NaN	RRAS2,CYCS,CTSD
Glioblastoma Multiforme Signaling	3,94E-01	3,42E-02	NaN	CDC42,MTOR,PDGFD,RRAS2,PDIA3
Valine Degradation I	3,91E-01	5,56E-02	NaN	DLD
TNFR1 Signaling	3,88E-01	4,08E-02	NaN	CDC42,CYCS
D-myo-inositol (1,3,4)-trisphosphate Biosynthesis	3,73E-01	5,26E-02	NaN	MINPP1
Regulation of the Epithelial-Mesenchymal Transition Pathway	3,68E-01	3,26E-02	NaN	LOX,CDH2,PDGFD,RRAS2,TGFB1,MMP2
p38 MAPK Signaling	3,67E-01	3,42E-02	NaN	HSPB1,TGFB1,IL18RAP,H3F3A/H3F3B
Amyloid Processing	3,67E-01	3,92E-02	NaN	APP,CAPNS1
GPCR-Mediated Nutrient Sensing in Enteroendocrine Cells	3,65E-01	3,57E-02	NaN	GNAI2,GNA11,PDIA3
PTEN Signaling	3,61E-01	3,39E-02	NaN	CDC42,RRAS2,ITGB1,ITGA5
CNTF Signaling	3,57E-01	3,85E-02	NaN	MTOR,RRAS2
DNA Methylation and Transcriptional Repression Signaling	3,57E-01	5E-02	NaN	RBBP4
Purine Nucleotides Degradation II (Aerobic)	3,57E-01	5E-02	NaN	NT5E
ErbB Signaling	3,51E-01	3,49E-02	NaN	CDC42,MTOR,RRAS2
HMGB1 Signaling	3,48E-01	3,33E-02	NaN	CDC42,RRAS2,TGFB1,SERPINE1
UVB-Induced MAPK Signaling	3,48E-01	3,77E-02	NaN	MTOR,H3F3A/H3F3B
Nicotine Degradation III	3,39E-01	3,7E-02	NaN	B4GAT1,EXT2
CTLA4 Signaling in Cytotoxic T Lymphocytes	3,36E-01	3,41E-02	NaN	CLTA,CLTC,AP2M1
Crosstalk between Dendritic Cells and Natural Killer Cells	3,29E-01	3,37E-02	NaN	TLN1,ACTB,FSCN1
Molecular Mechanisms of Cancer	3,28E-01	3,01E-02	NaN	GNAI2,CDC42,GNA11,RRAS2,TGFB1,ITGB1,BMP1,RAP1B,BAX,CYCS,ITGA5
Maturity Onset Diabetes of Young (MODY) Signaling	3,27E-01	4,55E-02	NaN	GAPDH
Tryptophan Degradation X (Mammalian, via Tryptamine)	3,27E-01	4,55E-02	NaN	AKR1A1
Ethanol Degradation IV	3,27E-01	4,55E-02	NaN	CAT
Nur77 Signaling in T Lymphocytes	3,13E-01	3,51E-02	NaN	CALM1 (includes others),CYCS
Melatonin Degradation I	3,13E-01	3,51E-02	NaN	B4GAT1,EXT2
Glutamate Receptor Signaling	3,13E-01	3,51E-02	NaN	CALM1 (includes others),GNB1
Factors Promoting Cardiogenesis in Vertebrates	3,09E-01	3,26E-02	NaN	TGFB1,BMP1,DKK1
Estrogen Receptor Signaling	3,08E-01	3,15E-02	NaN	RRAS2,H3F3A/H3F3B,PHB2,HNRNPD
Phospholipases	3,05E-01	3,45E-02	NaN	PRDX6,PDIA3
Triacylglycerol Degradation	3E-01	4,17E-02	NaN	PRDX6
Superpathway of D-myo-inositol (1,4,5)-trisphosphate Metabolism	3E-01	4,17E-02	NaN	MINPP1
GNRH Signaling	2,97E-01	3,1E-02	NaN	GNAI2,CDC42,GNA11,RRAS2
Xenobiotic Metabolism Signaling	2,91E-01	2,95E-02	NaN	GSTO1,SOD3,RRAS2,HSP90B1,CAT,HSP90AB1,GSTP1,HSP90AA1
Induction of Apoptosis by HIV1	2,89E-01	3,33E-02	NaN	BAX,CYCS
Antiproliferative Role of TOB in T Cell Signaling	2,76E-01	3,85E-02	NaN	TGFB1
NAD Salvage Pathway II	2,76E-01	3,85E-02	NaN	NT5E
Superpathway of Melatonin Degradation	2,74E-01	3,23E-02	NaN	B4GAT1,EXT2
GM-CSF Signaling	2,74E-01	3,23E-02	NaN	RRAS2,GNB2L1
Human Embryonic Stem Cell Pluripotency	2,72E-01	2,99E-02	NaN	INHBA,PDGFD,TGFB1,BMP1
Nicotine Degradation II	2,67E-01	3,17E-02	NaN	B4GAT1,EXT2
Endothelin-1 Signaling	2,63E-01	2,91E-02	NaN	PRDX6,GNAI2,GNA11,RRAS2,PDIA3
Eicosanoid Signaling	2,61E-01	3,12E-02	NaN	PRDX6,LTA4H
IL-15 Signaling	2,48E-01	3,03E-02	NaN	RRAS2,AXL
Neurotrophin/TRK Signaling	2,41E-01	2,99E-02	NaN	CDC42,RRAS2
Role of p14/p19ARF in Tumor Suppression	2,36E-01	3,33E-02	NaN	NPM1
IL-10 Signaling	2,35E-01	2,94E-02	NaN	IL18RAP,BLVRA
GDNF Family Ligand-Receptor Interactions	2,35E-01	2,94E-02	NaN	CDC42,RRAS2
Growth Hormone Signaling	2,29E-01	2,9E-02	NaN	A2M,IGFBP3
Cytotoxic T Lymphocyte-mediated Apoptosis of Target Cells	2,19E-01	3,12E-02	NaN	CYCS
Fatty Acid β-oxidation I	2,19E-01	3,12E-02	NaN	ACAA2
TWEAK Signaling	2,03E-01	2,94E-02	NaN	CYCS
IL-17A Signaling in Fibroblasts	1,96E-01	2,86E-02	NaN	MMP1
tRNA Splicing	1,96E-01	2,86E-02	NaN	APEX1
Ethanol Degradation II	1,96E-01	2,86E-02	NaN	AKR1A1

## Sheet: A MSC IRH
© 2000-2016 QIAGEN. All rights reserved.
Ingenuity Canonical Pathways	-log(p-value)	Ratio	z-score	Molecules
Remodeling of Epithelial Adherens Junctions	1,26E01	2,5E-01	NaN	IQGAP1,ACTR2,VCL,TUBB,TUBB6,ACTN1,TUBA1C,NME1,ARPC1B,ACTR3,TUBB4B,RAB5C,TUBA1A,ACTG1,TUBB2B,ACTA1,ACTN4
Hepatic Fibrosis / Hepatic Stellate Cell Activation	1,17E01	1,37E-01	NaN	IGFBP4,TGFB1,MMP2,COL6A1,COL5A3,COL1A1,MYH9,A2M,COL12A1,FN1,IGFBP3,VEGFC,COL6A3,COL3A1,COL1A2,COL6A2,COL5A1,TIMP2,MYL6,COL5A2,COL4A2,TIMP1,SERPINE1,BAX,MMP1
Actin Cytoskeleton Signaling	1,16E01	1,24E-01	NaN	IQGAP1,CDC42,ACTR2,VCL,ITGA2,ARPC1B,MYH9,FN1,CFL1,PFN1,ACTG1,ITGB1,ACTN4,TLN1,FLNA,EZR,MYL12A,MSN,FGF7,ACTN1,ACTR3,CFL2,RDX,MYL6,GSN,ACTA1,ITGA5
RhoGDI Signaling	1,06E01	1,33E-01	NaN	CDH2,CDC42,ACTR2,GNB2L1,ITGA2,EZR,MYL12A,MSN,GDI2,ARPC1B,ACTR3,CD44,RDX,CFL2,GNB2,MYL6,GNAI2,CFL1,ACTG1,ITGB1,ARHGDIA,ACTA1,ITGA5
Germ Cell-Sertoli Cell Junction Signaling	1,05E01	1,38E-01	NaN	IQGAP1,CDH2,CDC42,TGFB1,VCL,TUBB,ITGA2,TUBB6,JUP,ACTN1,TUBA1C,TUBB4B,CFL2,A2M,TUBA1A,CFL1,ACTG1,GSN,ITGB1,TUBB2B,ACTA1,ACTN4
Inhibition of Matrix Metalloproteases	1,02E01	3,08E-01	NaN	A2M,MMP3,RECK,MMP2,THBS2,HSPG2,ADAM12,LRP1,TIMP1,ADAM10,MMP1,TIMP2
Epithelial Adherens Junction Signaling	9,53E00	1,37E-01	NaN	IQGAP1,CDH2,CDC42,ACTR2,VCL,TUBB,TUBB6,JUP,ACTN1,TUBA1C,ARPC1B,ACTR3,TUBB4B,MYH9,MYL6,TUBA1A,ACTG1,TUBB2B,ACTA1,ACTN4
Signaling by Rho Family GTPases	9,39E00	1,07E-01	NaN	IQGAP1,CDH2,CDC42,ACTR2,ITGA2,ARPC1B,VIM,GNAI2,CFL1,ACTG1,SEPT11,ITGB1,GNB2L1,EZR,MYL12A,MSN,ACTR3,SEPT2,RDX,STMN1,CFL2,GNB2,MYL6,ACTA1,ITGA5
Axonal Guidance Signaling	8,87E00	7,83E-02	NaN	CDC42,ACTR2,MMP2,PAPPA,ITGA2,TUBB6,TUBA1C,ADAM10,ARPC1B,GNAI2,TUBA1A,CFL1,PFN1,ITGB1,SEMA7A,ADAM12,VEGFC,ADAM9,GNB2L1,TUBB,MYL12A,DPYSL2,ADAM15,ACTR3,CFL2,ADAMTS1,TUBB4B,GNB2,MYL6,BMP1,NRP1,TUBB2B,PDIA3,ITGA5
Caveolar-mediated Endocytosis Signaling	7,96E00	1,83E-01	NaN	FLNB,FLNA,ITGA2,PTRF,B2M,RAB5C,CAV1,ACTG1,ITGB1,FLNC,ACTA1,ITGA5,ALB
Leukocyte Extravasation Signaling	7,92E00	1,06E-01	NaN	CDC42,MMP2,VCL,ITGA2,EZR,MSN,ACTN1,EDIL3,CD44,RDX,TIMP2,MYL6,MMP3,GNAI2,ACTG1,ITGB1,TIMP1,ACTA1,ACTN4,ITGA5,MMP1
Regulation of Actin-based Motility by Rho	7,51E00	1,54E-01	NaN	CDC42,ACTR2,ITGA2,MYL12A,ACTR3,ARPC1B,MYL6,CFL1,PFN1,GSN,ITGB1,ARHGDIA,ACTA1,ITGA5
Protein Ubiquitination Pathway	7,29E00	9,02E-02	NaN	PSMB6,UBA1,HSP90B1,HSPA13,PSMA6,HSPD1,PSMA3,B2M,PSMB5,HSPA6,HSPB1,HSPA9,HSPA4,PSMB4,HSPA8,HSPA5,PSMA2,DNAJB11,PSMB2,HSP90AB1,PSMA1,HSP90AA1,PSMA5
Sertoli Cell-Sertoli Cell Junction Signaling	7,27E00	1,07E-01	NaN	CDC42,VCL,TUBB,ITGA2,TUBB6,JUP,ACTN1,TUBA1C,TUBB4B,SPTBN1,A2M,TUBA1A,ACTG1,ITGB1,TUBB2B,ACTA1,ACTN4,ITGA5,SPTAN1
Glycolysis I	7,13E00	3,2E-01	NaN	TPI1,PGAM1,PGK1,PKM,GAPDH,ALDOA,ENO1,GPI
Gluconeogenesis I	7,13E00	3,2E-01	NaN	PGAM1,PGK1,GAPDH,ALDOA,MDH2,ENO1,MDH1,GPI
ILK Signaling	6,97E00	1,02E-01	NaN	FLNB,CDC42,VCL,FLNA,DSP,ACTN1,CFL2,MYH9,KRT18,VIM,MYL6,FN1,CFL1,ACTG1,ITGB1,FLNC,ACTA1,ACTN4,VEGFC
RhoA Signaling	6,67E00	1,23E-01	NaN	ACTR2,EZR,MYL12A,MSN,ARPC1B,ACTR3,SEPT2,RDX,CFL2,MYL6,CFL1,PFN1,ACTG1,SEPT11,ACTA1
Clathrin-mediated Endocytosis Signaling	6,32E00	9,73E-02	NaN	CDC42,RAB11A,ACTR2,CLTC,FGF7,ARPC1B,ACTR3,RAB5C,LYZ,ACTG1,HSPA8,CLU,ITGB1,APOE,ACTA1,ITGA5,VEGFC,ALB
EIF2 Signaling	6,32E00	9,73E-02	NaN	RPL11,RPS18,RPL23,EIF3I,RPS14,RPS20,RPS12,RPSA,RPL12,RPS19,RPL5,RPLP0,EIF4A1,RPS27A,RPL27,RPL30,RPL10A,RPS25
Unfolded protein response	6,3E00	1,85E-01	NaN	CALR,HSPA4,HSPA9,HSPA8,HSP90B1,HSPA5,CANX,VCP,HSPA6,P4HB
14-3-3-mediated Signaling	6,12E00	1,2E-01	NaN	YWHAQ,YWHAG,TUBB,TUBB6,TUBA1C,YWHAE,TUBB4B,VIM,TUBA1A,TUBB2B,PDIA3,BAX,YWHAZ,YWHAB
Virus Entry via Endocytic Pathways	5,89E00	1,35E-01	NaN	FLNB,CDC42,CAV1,ACTG1,FLNA,ITGB1,CLTC,ITGA2,FLNC,B2M,ACTA1,ITGA5
Agrin Interactions at Neuromuscular Junction	5,29E00	1,45E-01	NaN	CDC42,ACTG1,ITGB1,ITGA2,LAMB1,LAMC1,ACTA1,DAG1,ITGA5,LAMA2
phagosome maturation	5,24E00	1,08E-01	NaN	TUBB,TUBB6,B2M,TUBA1C,PRDX1,TUBB4B,CALR,PRDX6,RAB5C,TUBA1A,TUBB2B,CANX,PRDX2
Integrin Signaling	5,17E00	8,46E-02	NaN	CDC42,ACTR2,TLN1,VCL,ITGA2,MYL12A,ACTN1,ARPC1B,ACTR3,CAV1,ACTG1,ITGB1,ARF4,ACTA1,ACTN4,ITGA5,CAPNS1
Regulation of Cellular Mechanics by Calpain Protease	5,13E00	1,58E-01	NaN	TLN1,VCL,ITGB1,ITGA2,EZR,ACTN1,ACTN4,ITGA5,CAPNS1
Aspartate Degradation II	4,98E00	5,71E-01	NaN	GOT2,MDH2,GOT1,MDH1
Rac Signaling	4,42E00	1,06E-01	NaN	IQGAP1,CDC42,ACTR2,CFL1,ITGB1,ITGA2,ACTR3,ARPC1B,CD44,ITGA5,CFL2
Atherosclerosis Signaling	4,39E00	9,68E-02	NaN	PRDX6,LYZ,MMP3,TGFB1,CLU,COL3A1,COL1A2,COL5A3,APOE,COL1A1,MMP1,ALB
Regulation of eIF4 and p70S6K Signaling	4,32E00	8,9E-02	NaN	RPS18,ITGA2,EIF3I,RPS14,RPS20,RPS12,RPSA,RPS19,ITGB1,EIF4A1,RPS27A,ITGA5,RPS25
Agranulocyte Adhesion and Diapedesis	4,31E00	7,94E-02	NaN	MMP2,ITGA2,EZR,MSN,RDX,MYH9,MYL6,MMP3,GNAI2,FN1,ACTG1,ITGB1,ACTA1,ITGA5,MMP1
Aldosterone Signaling in Epithelial Cells	4,14E00	8,55E-02	NaN	HSP90B1,HSPA13,HSPD1,HSPA6,HSPB1,HSPA4,HSPA9,HSPA8,HSPA5,DNAJB11,PDIA3,HSP90AB1,HSP90AA1
Ephrin Receptor Signaling	4,12E00	8,05E-02	NaN	CDC42,ACTR2,GNB2L1,ITGA2,ADAM10,ARPC1B,ACTR3,CFL2,GNB2,GNAI2,CFL1,ITGB1,ITGA5,VEGFC
Paxillin Signaling	3,83E00	9,9E-02	NaN	CDC42,TLN1,VCL,ACTG1,ITGB1,ITGA2,ACTN1,ACTA1,ACTN4,ITGA5
PI3K/AKT Signaling	3,76E00	8,94E-02	NaN	YWHAQ,YWHAG,ITGB1,HSP90B1,ITGA2,HSP90AB1,YWHAE,YWHAZ,HSP90AA1,YWHAB,ITGA5
Cdc42 Signaling	3,73E00	7,78E-02	NaN	IQGAP1,CDC42,ACTR2,ITGA2,MYL12A,B2M,ACTR3,ARPC1B,CFL2,MYL6,CFL1,ITGB1,ITGA5
Acute Phase Response Signaling	3,67E00	7,69E-02	NaN	C3,SERPINF1,C1R,A2M,FN1,SERPINE1,C1S,AHSG,SERPING1,ITIH2,SERPIND1,ALB,TTR
Antigen Presentation Pathway	3,66E00	1,62E-01	NaN	CALR,PSMB6,PDIA3,CANX,B2M,PSMB5
Semaphorin Signaling in Neurons	3,61E00	1,32E-01	NaN	CFL1,ITGB1,NRP1,DPYSL3,SEMA7A,DPYSL2,CFL2
Actin Nucleation by ARP-WASP Complex	3,46E00	1,25E-01	NaN	CDC42,ACTR2,ITGB1,ITGA2,ACTR3,ARPC1B,ITGA5
Chondroitin Sulfate Degradation (Metazoa)	3,45E00	2,67E-01	NaN	HEXB,GM2A,HEXA,CD44
Fcγ Receptor-mediated Phagocytosis in Macrophages and Monocytes	3,43E00	9,68E-02	NaN	CDC42,RAB11A,ACTR2,TLN1,ACTG1,EZR,ACTA1,ACTR3,ARPC1B
NRF2-mediated Oxidative Stress Response	3,41E00	7,22E-02	NaN	NQO2,TXNRD1,PPIB,PRDX1,GSTO1,SOD3,CCT7,ACTG1,CAT,DNAJB11,ACTA1,VCP,GSTP1
Myc Mediated Apoptosis Signaling	3,36E00	1,21E-01	NaN	YWHAQ,YWHAG,BAX,CYCS,YWHAE,YWHAZ,YWHAB
Dermatan Sulfate Degradation (Metazoa)	3,34E00	2,5E-01	NaN	HEXB,GM2A,HEXA,CD44
IGF-1 Signaling	3,29E00	9,28E-02	NaN	IGFBP4,YWHAQ,YWHAG,IGFBP7,IGFBP3,YWHAE,YWHAZ,YWHAB,IGFBP6
Intrinsic Prothrombin Activation Pathway	3,26E00	1,72E-01	NaN	COL3A1,COL1A2,COL5A3,COL1A1,SERPINC1
eNOS Signaling	3,22E00	7,75E-02	NaN	HSPA4,HSPA9,CAV1,CALM1 (includes others),HSPA8,HSP90B1,HSPA5,HSP90AB1,HSPA6,HSP90AA1,VEGFC
Mitochondrial Dysfunction	3,08E00	7,02E-02	NaN	ATP5O,VDAC1,PARK7,ATP5F1,CAT,VDAC2,ATP5A1,APP,CYCS,MT-CO2,PRDX3,ATP5B
UDP-N-acetyl-D-galactosamine Biosynthesis II	3E00	3,33E-01	NaN	PGM3,HK1,GPI
FAK Signaling	2,96E00	9,2E-02	NaN	TLN1,VCL,ACTG1,ITGB1,ITGA2,ACTA1,ITGA5,CAPNS1
Huntington's Disease Signaling	2,91E00	6,11E-02	NaN	GNB2L1,PENK,CLTC,CYCS,HSPA6,GNB2,HSPA4,HSPA9,HSPA8,HSPA5,BAX,CTSD,ATP5B,CAPNS1
Gap Junction Signaling	2,91E00	7,1E-02	NaN	GNAI2,TUBA1A,CAV1,ACTG1,TUBB,TUBB6,TUBB2B,PDIA3,ACTA1,TUBA1C,TUBB4B
PAK Signaling	2,9E00	8,99E-02	NaN	MYL6,CDC42,CFL1,ITGB1,ITGA2,MYL12A,ITGA5,CFL2
Glutamate Degradation II	2,78E00	6,67E-01	NaN	GOT2,GOT1
Aspartate Biosynthesis	2,78E00	6,67E-01	NaN	GOT2,GOT1
Complement System	2,76E00	1,35E-01	NaN	MASP1,C3,C1S,C1R,SERPING1
Pentose Phosphate Pathway	2,72E00	2,73E-01	NaN	TKT,PGLS,TALDO1
Aryl Hydrocarbon Receptor Signaling	2,71E00	7,14E-02	NaN	HSPB1,GSTO1,TGFB1,HSP90B1,NQO2,BAX,HSP90AB1,GSTP1,CTSD,HSP90AA1
TCA Cycle II (Eukaryotic)	2,71E00	1,74E-01	NaN	DLD,FH,MDH2,MDH1
Breast Cancer Regulation by Stathmin1	2,67E00	6,28E-02	NaN	GNAI2,TUBA1A,CDC42,CALM1 (includes others),GNB2L1,TUBB,TUBB6,TUBB2B,TUBA1C,STMN1,TUBB4B,GNB2
Protein Kinase A Signaling	2,62E00	4,92E-02	NaN	FLNB,YWHAQ,YWHAG,CALM1 (includes others),TGFB1,GNB2L1,FLNA,MYL12A,HIST1H1E,YWHAE,GNB2,MYL6,HIST3H3,GNAI2,PYGB,PDIA3,FLNC,YWHAZ,YWHAB
LXR/RXR Activation	2,61E00	7,44E-02	NaN	LYZ,VTN,C3,SERPINF1,CLU,APOE,AHSG,ALB,TTR
Lipid Antigen Presentation by CD1	2,51E00	1,54E-01	NaN	CALR,PDIA3,CANX,B2M
L-cysteine Degradation I	2,48E00	5E-01	NaN	GOT2,GOT1
Granulocyte Adhesion and Diapedesis	2,45E00	6,21E-02	NaN	HSPB1,GNAI2,MMP3,MMP2,ITGB1,ITGA2,EZR,MSN,ITGA5,MMP1,RDX
fMLP Signaling in Neutrophils	2,37E00	7,41E-02	NaN	GNAI2,CDC42,ACTR2,CALM1 (includes others),GNB2L1,ACTR3,ARPC1B,GNB2
Glutathione-mediated Detoxification	2,33E00	1,38E-01	NaN	GSTO1,GGH,ANPEP,GSTP1
Neuregulin Signaling	2,3E00	7,95E-02	NaN	ITGB1,HSP90B1,ITGA2,DCN,HSP90AB1,HSP90AA1,ITGA5
Serine Biosynthesis	2,27E00	4E-01	NaN	PSAT1,PHGDH
mTOR Signaling	2,26E00	5,85E-02	NaN	RPS19,RPS18,EIF4A1,RPS27A,EIF3I,VEGFC,RPS14,RPS20,RPS25,RPS12,RPSA
Cell Cycle: G2/M DNA Damage Checkpoint Regulation	2,22E00	1,02E-01	NaN	YWHAQ,YWHAG,YWHAE,YWHAZ,YWHAB
VEGF Signaling	2,2E00	7,61E-02	NaN	VCL,ACTG1,ACTN1,ACTA1,ACTN4,YWHAE,VEGFC
Glucocorticoid Receptor Signaling	2,19E00	5,09E-02	NaN	TGFB1,HSP90B1,HSPA6,KRT32,ANXA1,A2M,HSPA4,HSPA9,HSPA8,HSPA5,SERPINE1,HSP90AB1,HSP90AA1,MMP1
RAN Signaling	2,15E00	1,76E-01	NaN	IPO5,RAN,KPNB1
p70S6K Signaling	2,12E00	6,72E-02	NaN	GNAI2,YWHAQ,YWHAG,PDIA3,YWHAE,YWHAZ,EEF2,YWHAB
Ephrin B Signaling	2,11E00	8,22E-02	NaN	GNAI2,CDC42,CFL1,GNB2L1,CFL2,GNB2
Pyruvate Fermentation to Lactate	2,1E00	3,33E-01	NaN	LDHA,LDHB
Pentose Phosphate Pathway (Non-oxidative Branch)	2,1E00	3,33E-01	NaN	TKT,TALDO1
Rapoport-Luebering Glycolytic Shunt	2,1E00	3,33E-01	NaN	PGAM1,MINPP1
Amyotrophic Lateral Sclerosis Signaling	2,05E00	7,14E-02	NaN	RAB5C,CAT,BAX,CYCS,SSR4,VEGFC,CAPNS1
Coagulation System	2,03E00	1,14E-01	NaN	A2M,SERPINE1,SERPINC1,SERPIND1
Superpathway of Serine and Glycine Biosynthesis I	1,96E00	2,86E-01	NaN	PSAT1,PHGDH
GDP-glucose Biosynthesis	1,96E00	2,86E-01	NaN	PGM3,HK1
HIF1α Signaling	1,96E00	6,86E-02	NaN	MMP3,MMP2,LDHA,HSP90AA1,VEGFC,MMP1,LDHB
FXR/RXR Activation	1,95E00	6,3E-02	NaN	VTN,C3,SERPINF1,CLU,APOE,AHSG,ALB,TTR
Glioma Invasiveness Signaling	1,95E00	8,77E-02	NaN	VTN,MMP2,TIMP1,CD44,TIMP2
Reelin Signaling in Neurons	1,95E00	7,59E-02	NaN	RELN,ITGB1,ITGA2,APP,APOE,ITGA5
Endoplasmic Reticulum Stress Pathway	1,89E00	1,43E-01	NaN	CALR,HSP90B1,HSPA5
Docosahexaenoic Acid (DHA) Signaling	1,87E00	1,03E-01	NaN	SERPINF1,APP,BAX,CYCS
ERK/MAPK Signaling	1,84E00	5,35E-02	NaN	HSPB1,HIST3H3,YWHAQ,YWHAG,TLN1,ITGB1,ITGA2,YWHAZ,YWHAB,ITGA5
Airway Pathology in Chronic Obstructive Pulmonary Disease	1,84E00	2,5E-01	NaN	MMP2,MMP1
Glucose and Glucose-1-phosphate Degradation	1,84E00	2,5E-01	NaN	PGM3,HK1
Superoxide Radicals Degradation	1,84E00	2,5E-01	NaN	SOD3,CAT
phagosome formation	1,81E00	6,42E-02	NaN	FN1,VTN,ITGB1,MRC2,ITGA2,PDIA3,ITGA5
Role of Tissue Factor in Cancer	1,79E00	6,36E-02	NaN	CDC42,CFL1,ITGB1,VEGFC,MMP1,CFL2,P4HB
Role of Osteoblasts, Osteoclasts and Chondrocytes in Rheumatoid Arthritis	1,79E00	5,02E-02	NaN	MMP3,CALM1 (includes others),TGFB1,GSN,ITGB1,ITGA2,BMP1,LRP1,COL1A1,ITGA5,MMP1
HIPPO signaling	1,78E00	6,98E-02	NaN	YWHAQ,YWHAG,YWHAE,YWHAZ,YWHAB,CD44
Androgen Signaling	1,77E00	6,31E-02	NaN	CALR,GNAI2,HSPA4,CALM1 (includes others),GNB2L1,HSP90AA1,GNB2
ERK5 Signaling	1,77E00	7,94E-02	NaN	YWHAQ,YWHAG,YWHAE,YWHAZ,YWHAB
Bladder Cancer Signaling	1,75E00	6,9E-02	NaN	MMP3,MMP2,FGF7,THBS1,VEGFC,MMP1
Sucrose Degradation V (Mammalian)	1,74E00	2,22E-01	NaN	TPI1,ALDOA
Tight Junction Signaling	1,73E00	5,39E-02	NaN	MYL6,RAB13,CDC42,TGFB1,VCL,ACTG1,ACTA1,MYH9,SPTAN1
Hypoxia Signaling in the Cardiovascular System	1,72E00	7,69E-02	NaN	HSP90B1,LDHA,HSP90AB1,HSP90AA1,P4HB
Glycogen Degradation II	1,65E00	2E-01	NaN	PYGB,PGM3
Death Receptor Signaling	1,65E00	6,52E-02	NaN	HSPB1,ACTG1,ACTA1,CYCS,LMNA,SPTAN1
Acetyl-CoA Biosynthesis III (from Citrate)	1,62E00	1E00	NaN	ACLY
Glutamate Removal from Folates	1,62E00	1E00	NaN	GGH
Calcium Signaling	1,57E00	5,06E-02	NaN	CALR,MYL6,TPM3,CALM1 (includes others),TPM4,TPM2,ACTA1,TPM1,MYH9
Ephrin A Signaling	1,57E00	8,33E-02	NaN	CDC42,CFL1,ADAM10,CFL2
Glycogen Degradation III	1,5E00	1,67E-01	NaN	PYGB,PGM3
Nitric Oxide Signaling in the Cardiovascular System	1,49E00	6E-02	NaN	CAV1,CALM1 (includes others),HSP90B1,HSP90AB1,HSP90AA1,VEGFC
Tec Kinase Signaling	1,46E00	5,1E-02	NaN	GNAI2,ACTG1,GNB2L1,ITGB1,ITGA2,ACTA1,ITGA5,GNB2
Cellular Effects of Sildenafil (Viagra)	1,46E00	5,43E-02	NaN	MYL6,CALM1 (includes others),ACTG1,MYL12A,PDIA3,ACTA1,MYH9
Superpathway of Methionine Degradation	1,4E00	9,38E-02	NaN	DLD,GOT2,GOT1
Phenylalanine Degradation IV (Mammalian, via Side Chain)	1,37E00	1,43E-01	NaN	GOT2,GOT1
Colanic Acid Building Blocks Biosynthesis	1,37E00	1,43E-01	NaN	GPI,UGDH
Oxidative Phosphorylation	1,34E00	5,5E-02	NaN	ATP5O,ATP5F1,ATP5A1,CYCS,MT-CO2,ATP5B
Inhibition of Angiogenesis by TSP1	1,33E00	8,82E-02	NaN	TGFB1,HSPG2,THBS1
UDP-D-xylose and UDP-D-glucuronate Biosynthesis	1,33E00	5E-01	NaN	UGDH
L-cysteine Degradation III	1,33E00	5E-01	NaN	GOT1
Adenine and Adenosine Salvage I	1,33E00	5E-01	NaN	APRT
Glutamate Biosynthesis II	1,33E00	5E-01	NaN	GLUD1
Glutamate Degradation X	1,33E00	5E-01	NaN	GLUD1
Telomere Extension by Telomerase	1,32E00	1,33E-01	NaN	HNRNPA1,HNRNPA2B1
nNOS Signaling in Skeletal Muscle Cells	1,32E00	1,33E-01	NaN	CALM1 (includes others),DAG1
γ-glutamyl Cycle	1,32E00	1,33E-01	NaN	ANPEP,GSS
Vitamin-C Transport	1,32E00	1,33E-01	NaN	GSTO1,TXNRD1
Parkinson's Signaling	1,26E00	1,25E-01	NaN	PARK7,CYCS
α-Adrenergic Signaling	1,25E00	5,75E-02	NaN	GNAI2,PYGB,CALM1 (includes others),GNB2L1,GNB2
Phospholipase C Signaling	1,24E00	4,22E-02	NaN	PEBP1,MYL6,CALM1 (includes others),GNB2L1,ITGB1,ITGA2,MYL12A,ITGA5,AHNAK,GNB2
G Beta Gamma Signaling	1,23E00	5,68E-02	NaN	GNAI2,CDC42,CAV1,GNB2L1,GNB2
CCR3 Signaling in Eosinophils	1,22E00	5,13E-02	NaN	GNAI2,CFL1,CALM1 (includes others),GNB2L1,CFL2,GNB2
Apoptosis Signaling	1,21E00	5,62E-02	NaN	BAX,CYCS,CAPNS1,LMNA,SPTAN1
Diphthamide Biosynthesis	1,16E00	3,33E-01	NaN	EEF2
Trehalose Degradation II (Trehalase)	1,16E00	3,33E-01	NaN	HK1
NADH Repair	1,16E00	3,33E-01	NaN	GAPDH
Glutathione Biosynthesis	1,16E00	3,33E-01	NaN	GSS
Thyroid Hormone Biosynthesis	1,16E00	3,33E-01	NaN	CTSD
Mitotic Roles of Polo-Like Kinase	1,14E00	6,06E-02	NaN	TGFB1,HSP90B1,HSP90AB1,HSP90AA1
IL-8 Signaling	1,13E00	4,35E-02	NaN	IQGAP1,GNAI2,MMP2,GNB2L1,BAX,LASP1,VEGFC,GNB2
Macropinocytosis Signaling	1,1E00	5,88E-02	NaN	CDC42,ITGB1,ACTN4,ITGA5
Granzyme A Signaling	1,09E00	1E-01	NaN	HIST1H1E,NME1
CCR5 Signaling in Macrophages	1,09E00	5,8E-02	NaN	GNAI2,CALM1 (includes others),GNB2L1,GNB2
Cardiac Hypertrophy Signaling	1,06E00	4,04E-02	NaN	HSPB1,MYL6,GNAI2,CALM1 (includes others),TGFB1,GNB2L1,MYL12A,PDIA3,GNB2
Arsenate Detoxification I (Glutaredoxin)	1,04E00	2,5E-01	NaN	GSTO1
Uracil Degradation II (Reductive)	1,04E00	2,5E-01	NaN	DPYSL2
2-ketoglutarate Dehydrogenase Complex	1,04E00	2,5E-01	NaN	DLD
Heme Degradation	1,04E00	2,5E-01	NaN	BLVRB
Branched-chain α-keto acid Dehydrogenase Complex	1,04E00	2,5E-01	NaN	DLD
Ascorbate Recycling (Cytosolic)	1,04E00	2,5E-01	NaN	GSTO1
Glutathione Redox Reactions II	1,04E00	2,5E-01	NaN	PDIA3
Thymine Degradation	1,04E00	2,5E-01	NaN	DPYSL2
Arginine Degradation I (Arginase Pathway)	1,04E00	2,5E-01	NaN	ARG1
N-acetylglucosamine Degradation II	1,04E00	2,5E-01	NaN	NAGK
Tumoricidal Function of Hepatic Natural Killer Cells	9,56E-01	8,33E-02	NaN	BAX,CYCS
Colorectal Cancer Metastasis Signaling	9,51E-01	3,81E-02	NaN	MMP3,TGFB1,MMP2,GNB2L1,LRP1,BAX,VEGFC,MMP1,GNB2
Pentose Phosphate Pathway (Oxidative Branch)	9,45E-01	2E-01	NaN	PGLS
CMP-N-acetylneuraminate Biosynthesis I (Eukaryotes)	9,45E-01	2E-01	NaN	NAGK
2-oxobutanoate Degradation I	9,45E-01	2E-01	NaN	DLD
Heparan Sulfate Biosynthesis (Late Stages)	9,36E-01	6E-02	NaN	PRDX6,EXT1,EXT2
Dendritic Cell Maturation	8,84E-01	3,95E-02	NaN	COL3A1,COL1A2,COL5A3,PDIA3,B2M,COL1A1,FSCN1
Prostate Cancer Signaling	8,81E-01	4,88E-02	NaN	HSP90B1,HSP90AB1,GSTP1,HSP90AA1
Arginine Biosynthesis IV	8,71E-01	1,67E-01	NaN	GLUD1
Urea Cycle	8,71E-01	1,67E-01	NaN	ARG1
Arginine Degradation VI (Arginase 2 Pathway)	8,71E-01	1,67E-01	NaN	ARG1
Thioredoxin Pathway	8,71E-01	1,67E-01	NaN	TXNRD1
Glycine Cleavage Complex	8,71E-01	1,67E-01	NaN	DLD
UDP-N-acetyl-D-glucosamine Biosynthesis II	8,71E-01	1,67E-01	NaN	PGM3
Glycogen Biosynthesis II (from UDP-D-Glucose)	8,71E-01	1,67E-01	NaN	GBE1
GDP-mannose Biosynthesis	8,71E-01	1,67E-01	NaN	GPI
CD28 Signaling in T Helper Cells	8,22E-01	4,24E-02	NaN	CDC42,ACTR2,CALM1 (includes others),ACTR3,ARPC1B
TGF-β Signaling	8,14E-01	4,6E-02	NaN	INHBA,CDC42,TGFB1,SERPINE1
Heparan Sulfate Biosynthesis	8,12E-01	5,26E-02	NaN	PRDX6,EXT1,EXT2
Acetyl-CoA Biosynthesis I (Pyruvate Dehydrogenase Complex)	8,09E-01	1,43E-01	NaN	DLD
Crosstalk between Dendritic Cells and Natural Killer Cells	7,89E-01	4,49E-02	NaN	TLN1,ACTG1,ACTA1,FSCN1
Induction of Apoptosis by HIV1	7,66E-01	5E-02	NaN	SLC25A6,BAX,CYCS
Citrulline Biosynthesis	7,56E-01	1,25E-01	NaN	ARG1
Cytotoxic T Lymphocyte-mediated Apoptosis of Target Cells	7,54E-01	6,25E-02	NaN	B2M,CYCS
G Protein Signaling Mediated by Tubby	7,33E-01	6,06E-02	NaN	GNB2L1,GNB2
PCP pathway	7,23E-01	4,76E-02	NaN	HSPB1,PFN1,CTHRC1
Oncostatin M Signaling	7,13E-01	5,88E-02	NaN	MMP3,MMP1
Cell Cycle: G1/S Checkpoint Regulation	7,09E-01	4,69E-02	NaN	RPL5,TGFB1,RPL11
p53 Signaling	6,88E-01	4,08E-02	NaN	SERPINE2,BAX,THBS1,TP53I3
CDK5 Signaling	6,77E-01	4,04E-02	NaN	ITGB1,ITGA2,LAMB1,LAMC1
Antioxidant Action of Vitamin C	6,77E-01	4,04E-02	NaN	PRDX6,GSTO1,TXNRD1,PDIA3
Calcium Transport I	6,69E-01	1E-01	NaN	ANXA5
IL-12 Signaling and Production in Macrophages	6,67E-01	3,73E-02	NaN	LYZ,TGFB1,CLU,APOE,ALB
Melatonin Signaling	6,33E-01	4,29E-02	NaN	GNAI2,CALM1 (includes others),PDIA3
Renal Cell Carcinoma Signaling	6,22E-01	4,23E-02	NaN	CDC42,TGFB1,FH
Chemokine Signaling	6,22E-01	4,23E-02	NaN	GNAI2,CFL1,CALM1 (includes others)
HGF Signaling	6,19E-01	3,81E-02	NaN	CDC42,ITGB1,ITGA2,ITGA5
Neuroprotective Role of THOP1 in Alzheimer's Disease	6,09E-01	5E-02	NaN	APP,YWHAE
NF-κB Activation by Viruses	5,99E-01	4,11E-02	NaN	ITGB1,ITGA2,ITGA5
PPARα/RXRα Activation	5,94E-01	3,35E-02	NaN	TGFB1,HSP90B1,GOT2,PDIA3,HSP90AB1,HSP90AA1
Role of NFAT in Cardiac Hypertrophy	5,94E-01	3,35E-02	NaN	GNAI2,CALM1 (includes others),TGFB1,GNB2L1,PDIA3,GNB2
Mechanisms of Viral Exit from Host Cells	5,93E-01	4,88E-02	NaN	ACTG1,ACTA1
Guanosine Nucleotides Degradation III	5,7E-01	7,69E-02	NaN	NT5E
HER-2 Signaling in Breast Cancer	5,67E-01	3,95E-02	NaN	CDC42,MMP2,ITGB1
Isoleucine Degradation I	5,43E-01	7,14E-02	NaN	DLD
Superpathway of Citrulline Metabolism	5,43E-01	7,14E-02	NaN	ARG1
Urate Biosynthesis/Inosine 5'-phosphate Degradation	5,43E-01	7,14E-02	NaN	NT5E
CXCR4 Signaling	5,29E-01	3,29E-02	NaN	MYL6,GNAI2,GNB2L1,MYL12A,GNB2
MSP-RON Signaling Pathway	5,24E-01	4,35E-02	NaN	ACTG1,ACTA1
Thrombin Signaling	5,18E-01	3,14E-02	NaN	MYL6,GNAI2,GNB2L1,MYL12A,PDIA3,GNB2
Gα12/13 Signaling	5,17E-01	3,42E-02	NaN	CDH2,MYL6,CDC42,MYL12A
nNOS Signaling in Neurons	5,11E-01	4,26E-02	NaN	CALM1 (includes others),CAPNS1
PTEN Signaling	5,1E-01	3,39E-02	NaN	CDC42,ITGB1,ITGA2,ITGA5
P2Y Purigenic Receptor Signaling Pathway	5,02E-01	3,36E-02	NaN	GNAI2,GNB2L1,PDIA3,GNB2
Xenobiotic Metabolism Signaling	4,97E-01	2,95E-02	NaN	GSTO1,SOD3,HSP90B1,CAT,NQO2,HSP90AB1,GSTP1,HSP90AA1
Granzyme B Signaling	4,95E-01	6,25E-02	NaN	CYCS
Extrinsic Prothrombin Activation Pathway	4,95E-01	6,25E-02	NaN	SERPINC1
Gαi Signaling	4,95E-01	3,33E-02	NaN	GNAI2,CAV1,GNB2L1,GNB2
Sperm Motility	4,88E-01	3,31E-02	NaN	PRDX6,CALM1 (includes others),PDIA3,PTK7
TNFR1 Signaling	4,87E-01	4,08E-02	NaN	CDC42,CYCS
Adenosine Nucleotides Degradation II	4,74E-01	5,88E-02	NaN	NT5E
Amyloid Processing	4,64E-01	3,92E-02	NaN	APP,CAPNS1
Valine Degradation I	4,54E-01	5,56E-02	NaN	DLD
Glutathione Redox Reactions I	4,35E-01	5,26E-02	NaN	PRDX6
D-myo-inositol (1,3,4)-trisphosphate Biosynthesis	4,35E-01	5,26E-02	NaN	MINPP1
IL-1 Signaling	4,33E-01	3,3E-02	NaN	GNAI2,GNB2L1,GNB2
Molecular Mechanisms of Cancer	4,31E-01	2,74E-02	NaN	GNAI2,CDC42,TGFB1,ITGB1,ITGA2,BMP1,LRP1,BAX,CYCS,ITGA5
Factors Promoting Cardiogenesis in Vertebrates	4,26E-01	3,26E-02	NaN	TGFB1,BMP1,LRP1
Purine Nucleotides Degradation II (Aerobic)	4,17E-01	5E-02	NaN	NT5E
CREB Signaling in Neurons	4,15E-01	2,92E-02	NaN	GNAI2,CALM1 (includes others),GNB2L1,PDIA3,GNB2
PPAR Signaling	4,11E-01	3,19E-02	NaN	HSP90B1,HSP90AB1,HSP90AA1
Nur77 Signaling in T Lymphocytes	4,04E-01	3,51E-02	NaN	CALM1 (includes others),CYCS
Phospholipases	3,95E-01	3,45E-02	NaN	PRDX6,PDIA3
Role of Macrophages, Fibroblasts and Endothelial Cells in Rheumatoid Arthritis	3,89E-01	2,7E-02	NaN	MMP3,FN1,CALM1 (includes others),TGFB1,PDIA3,LRP1,VEGFC,MMP1
Maturity Onset Diabetes of Young (MODY) Signaling	3,86E-01	4,55E-02	NaN	GAPDH
Pyrimidine Deoxyribonucleotides De Novo Biosynthesis I	3,86E-01	4,55E-02	NaN	NME1
Ethanol Degradation IV	3,86E-01	4,55E-02	NaN	CAT
Telomerase Signaling	3,77E-01	3,03E-02	NaN	HSP90B1,HSP90AB1,HSP90AA1
Production of Nitric Oxide and Reactive Oxygen Species in Macrophages	3,69E-01	2,78E-02	NaN	LYZ,CLU,CAT,APOE,ALB
Triacylglycerol Degradation	3,57E-01	4,17E-02	NaN	PRDX6
Superpathway of D-myo-inositol (1,4,5)-trisphosphate Metabolism	3,57E-01	4,17E-02	NaN	MINPP1
Antiproliferative Role of Somatostatin Receptor 2	3,52E-01	3,17E-02	NaN	GNB2L1,GNB2
Regulation of the Epithelial-Mesenchymal Transition Pathway	3,51E-01	2,72E-02	NaN	LOX,CDH2,TGFB1,MMP2,FGF7
Pancreatic Adenocarcinoma Signaling	3,34E-01	2,83E-02	NaN	CDC42,TGFB1,VEGFC
Antiproliferative Role of TOB in T Cell Signaling	3,32E-01	3,85E-02	NaN	TGFB1
NAD Salvage Pathway II	3,32E-01	3,85E-02	NaN	NT5E
IL-15 Production	3,2E-01	3,7E-02	NaN	PTK7
Growth Hormone Signaling	3,09E-01	2,9E-02	NaN	A2M,IGFBP3
Role of MAPK Signaling in the Pathogenesis of Influenza	3,09E-01	2,9E-02	NaN	PRDX6,BAX
Corticotropin Releasing Hormone Signaling	3,06E-01	2,7E-02	NaN	GNAI2,CALM1 (includes others),KRT1
Pyrimidine Ribonucleotides Interconversion	2,99E-01	3,45E-02	NaN	NME1
GPCR-Mediated Integration of Enteroendocrine Signaling Exemplified by an L Cell	2,95E-01	2,82E-02	NaN	GNAI2,PDIA3
IL-17 Signaling	2,89E-01	2,78E-02	NaN	MMP3,TIMP1
Role of p14/p19ARF in Tumor Suppression	2,88E-01	3,33E-02	NaN	NPM1
IL-6 Signaling	2,81E-01	2,59E-02	NaN	A2M,HSPB1,COL1A1
Pyrimidine Ribonucleotides De Novo Biosynthesis	2,79E-01	3,23E-02	NaN	NME1
p38 MAPK Signaling	2,76E-01	2,56E-02	NaN	HSPB1,HIST3H3,TGFB1
TREM1 Signaling	2,71E-01	2,67E-02	NaN	ITGB1,ITGA5
Fatty Acid β-oxidation I	2,7E-01	3,12E-02	NaN	ACAA2
VEGF Family Ligand-Receptor Interactions	2,65E-01	2,63E-02	NaN	NRP1,VEGFC
HMGB1 Signaling	2,62E-01	2,5E-02	NaN	CDC42,TGFB1,SERPINE1
VDR/RXR Activation	2,54E-01	2,56E-02	NaN	IGFBP3,IGFBP6
TWEAK Signaling	2,52E-01	2,94E-02	NaN	CYCS
Regulation of IL-2 Expression in Activated and Anergic T Lymphocytes	2,49E-01	2,53E-02	NaN	CALM1 (includes others),TGFB1
IL-17A Signaling in Fibroblasts	2,44E-01	2,86E-02	NaN	MMP1
Thyroid Hormone Metabolism II (via Conjugation and/or Degradation)	2,44E-01	2,86E-02	NaN	EXT2
Ceramide Signaling	2,43E-01	2,5E-02	NaN	CYCS,CTSD
Role of Pattern Recognition Receptors in Recognition of Bacteria and Viruses	2,37E-01	2,38E-02	NaN	C3,TGFB1,PTX3
Interferon Signaling	2,36E-01	2,78E-02	NaN	BAX
GPCR-Mediated Nutrient Sensing in Enteroendocrine Cells	2,24E-01	2,38E-02	NaN	GNAI2,PDIA3
Role of PKR in Interferon Induction and Antiviral Response	2,08E-01	2,5E-02	NaN	CYCS
